# Supplementary material for: Chromosome engineering to correct a complex rearrangement on Chromosome 8 reveals the effects of 8p syndrome on gene expression and neural differentiation
Source: bioRxiv preprint, doi:10.1101/2024.11.17.624023, version 3 (2025-08-22)
Supplement: Table S5 [file 624023_file08.xlsx]

## Sheet: GOBP_Upregulated_in_both
Term	Overlap	P-value	Adjusted P-value	Old P-value	Old Adjusted P-value	Odds Ratio	Combined Score	Genes
Basement Membrane Organization (GO:0071711)	3/9	0.000647628	0.369069	0	0	24.223076923076924	177.85051780731814	HPN;NID1;NID2
Extracellular Matrix Organization (GO:0030198)	9/126	0.00111738	0.369069	0	0	3.7810417928528164	25.698873843267645	COL1A2;COL22A1;COL8A2;PLOD1;NID1;GAS6;NID2;LOXL1;KLK6
Receptor-Mediated Virion Attachment to Host Cell (GO:0046813)	2/3	0.00123216	0.369069	0	0	96.55938697318008	646.8498009387891	GAS6;ICAM1
Homologous Chromosome Pairing at Meiosis (GO:0007129)	3/12	0.00162071	0.369069	0	0	16.144871794871793	103.7290672757222	SYCE2;STAG3;MEIOB
Regulation of Tumor Necrosis Factor Production (GO:0032680)	6/63	0.00176649	0.369069	0	0	5.138234691787836	32.570054675576046	SYT12;OAS3;PLCG2;ARHGEF2;GAS6;AGER
Positive Regulation of Dendritic Cell Cytokine Production (GO:0002732)	2/4	0.00243106	0.369069	0	0	48.275862068965516	290.5931633533215	PLCG2;TICAM1
Synaptonemal Complex Assembly (GO:0007130)	2/4	0.00243106	0.369069	0	0	48.275862068965516	290.5931633533215	SYCE2;STAG3
Synaptonemal Complex Organization (GO:0070193)	2/4	0.00243106	0.369069	0	0	48.275862068965516	290.5931633533215	SYCE2;STAG3
Negative Regulation of Endothelial Cell Apoptotic Process (GO:2000352)	3/16	0.00388337	0.369069	0	0	11.173668639053254	62.02560947379688	IL11;GAS6;ICAM1
Extracellular Matrix Assembly (GO:0085029)	3/16	0.00388337	0.369069	0	0	11.173668639053254	62.02560947379688	TNXB;LTBP4;GAS6
Zymogen Activation (GO:0031638)	3/16	0.00388337	0.369069	0	0	11.173668639053254	62.02560947379688	C1R;C1RL;CUZD1
Amino Acid Biosynthetic Process (GO:0008652)	2/5	0.00399714	0.369069	0	0	32.181353767560665	177.71108671687753	PAH;CARNS1
Glucose Mediated Signaling Pathway (GO:0010255)	2/5	0.00399714	0.369069	0	0	32.181353767560665	177.71108671687753	MLXIPL;AGER
Hexose Mediated Signaling (GO:0009757)	2/5	0.00399714	0.369069	0	0	32.181353767560665	177.71108671687753	MLXIPL;AGER
Regulation of Cell Killing (GO:0031341)	2/5	0.00399714	0.369069	0	0	32.181353767560665	177.71108671687753	IL11;ICAM1
Transport Along Microtubule (GO:0010970)	3/17	0.00464495	0.391378	0	0	10.374725274725275	55.73275483092654	CLIP3;SPG11;DYNC1I1
Regulation of Interleukin-6 Production (GO:0032675)	5/54	0.00480391	0.391378	0	0	4.964799873437747	26.503711633366798	SYT12;PLCG2;ARHGEF2;GAS6;AGER
Elastic Fiber Assembly (GO:0048251)	2/6	0.00591502	0.449137	0	0	24.134099616858236	123.81420060660378	TNXB;LTBP4
Supramolecular Fiber Organization (GO:0097435)	11/224	0.00640937	0.449137	0	0	2.5389186973694016	12.82152312940994	CLIP3;CLIP2;COL1A2;TNXB;KATNAL2;LTBP4;KRT7;ARHGEF2;PLOD1;LOXL1;TRDN
Positive Regulation of Tumor Necrosis Factor Production (GO:0032760)	4/38	0.00729997	0.449137	0	0	5.708834885305474	28.08680773449658	OAS3;PLCG2;ARHGEF2;AGER
Regulation of Small GTPase Mediated Signal Transduction (GO:0051056)	8/138	0.00742123	0.449137	0	0	3.0098340874811464	14.75845210944343	PLEKHG4;DNMBP;ARHGEF25;MCF2L;PLEKHG5;PLEKHG4B;ARHGEF2;NGEF
Calcium Ion Transport (GO:0006816)	6/85	0.00784393	0.449137	0	0	3.7008323893020734	17.94169208500687	SLC24A1;CACNG8;CALCRL;P2RX2;ATP2B4;GAS6
Intestinal Absorption (GO:0050892)	2/7	0.00816977	0.449137	0	0	19.30574712643678	92.80879520800805	HEPH;F11R
Membrane Biogenesis (GO:0044091)	2/7	0.00816977	0.449137	0	0	19.30574712643678	92.80879520800805	CLIP3;TLCD2
Calcium Ion Import (GO:0070509)	3/21	0.00855456	0.449137	0	0	8.066666666666666	38.40774861960658	SLC24A1;ATP2B4;CACNA1F
Positive Regulation of Rho Protein Signal Transduction (GO:0035025)	3/21	0.00855456	0.449137	0	0	8.066666666666666	38.40774861960658	ADGRG1;MCF2L;F11R
Positive Regulation of Tumor Necrosis Factor Superfamily Cytokine Production (GO:1903557)	4/40	0.00875575	0.449137	0	0	5.390819390819391	25.541945159803877	OAS3;PLCG2;ARHGEF2;AGER
Heart Contraction (GO:0060047)	3/22	0.0097578	0.479625	0	0	7.641497975708502	35.3777514974482	GAA;TNNI3;TRDN
Intracellular Calcium Ion Homeostasis (GO:0006874)	6/90	0.0102678	0.479625	0	0	3.4791550861589773	15.930155809127795	SLC24A1;HRC;ATP2B4;TNNI3;CLCC1;TRDN
Heart Process (GO:0003015)	2/8	0.0107469	0.479625	0	0	16.08684546615581	72.92386463251839	TNNI3;TRDN
Regulation of Hormone Secretion (GO:0046883)	2/9	0.0136324	0.479625	0	0	13.787629994526545	59.22205171453918	IL11;SCG5
Positive Regulation of Cellular Extravasation (GO:0002693)	2/9	0.0136324	0.479625	0	0	13.787629994526545	59.22205171453918	AGER;ICAM1
Positive Regulation of Vascular Endothelial Growth Factor Signaling Pathway (GO:1900748)	2/9	0.0136324	0.479625	0	0	13.787629994526545	59.22205171453918	ADGRG1;TNXB
Leukocyte Tethering or Rolling (GO:0050901)	2/9	0.0136324	0.479625	0	0	13.787629994526545	59.22205171453918	GCNT1;MADCAM1
Regulation of Cell Communication by Electrical Coupling Involved in Cardiac Conduction (GO:1901844)	2/9	0.0136324	0.479625	0	0	13.787629994526545	59.22205171453918	HRC;TRDN
Establishment of Endothelial Barrier (GO:0061028)	3/25	0.0139334	0.479625	0	0	6.5979020979020975	28.195916215298936	F11R;TJP3;ICAM1
Potassium Ion Transmembrane Transport (GO:0071805)	5/70	0.0141403	0.479625	0	0	3.7379248658318427	15.9187895805513	SLC24A1;KCNIP1;ABCC8;HPN;ATP1B2
Positive Regulation of Protein Phosphorylation (GO:0001934)	7/127	0.015443	0.479625	0	0	2.8442057291666667	11.862042714532855	CLIP3;IL11;FAXDC2;AGAP2;PDGFA;ARHGEF2;GAS6
Negative Regulation of Synaptic Transmission (GO:0050805)	2/10	0.0168127	0.479625	0	0	12.063218390804598	49.285702028613535	SLC24A1;GRIK3
Establishment of Endothelial Intestinal Barrier (GO:0090557)	2/10	0.0168127	0.479625	0	0	12.063218390804598	49.285702028613535	F11R;TJP3
Meiosis I (GO:0007127)	2/10	0.0168127	0.479625	0	0	12.063218390804598	49.285702028613535	MEIOC;MEIOB
Mesoderm Development (GO:0007498)	2/10	0.0168127	0.479625	0	0	12.063218390804598	49.285702028613535	GDF11;HCK
Cytoplasmic Microtubule Organization (GO:0031122)	4/50	0.0188401	0.479625	0	0	4.215544737283868	16.743158146654775	CLIP3;CLIP2;KATNAL2;TRDN
Regulation of Peptidyl-Tyrosine Phosphorylation (GO:0050730)	3/28	0.0189773	0.479625	0	0	5.804769230769231	23.01308940366592	IL11;PDGFA;ARHGEF2
Inorganic Cation Import Across Plasma Membrane (GO:0098659)	4/51	0.0201245	0.479625	0	0	4.125523699991785	16.113549481486153	SLC24A1;ATP2B4;ATP1B2;CACNA1F
Positive Regulation of Calcium-Mediated Signaling (GO:0050850)	2/11	0.0202747	0.479625	0	0	10.722009365687526	41.798493919016906	P2RX2;PLCG2
Leukocyte Adhesion to Vascular Endothelial Cell (GO:0061756)	2/11	0.0202747	0.479625	0	0	10.722009365687526	41.798493919016906	GCNT1;MADCAM1
Lipopolysaccharide-Mediated Signaling Pathway (GO:0031663)	2/11	0.0202747	0.479625	0	0	10.722009365687526	41.798493919016906	HCK;PLCG2
Membrane Repolarization (GO:0086009)	2/11	0.0202747	0.479625	0	0	10.722009365687526	41.798493919016906	KCNIP1;ATP1B2
Oxygen Transport (GO:0015671)	1/1	0.0204429	0.479625	0	0	Infinity	Infinity	MB
Toxin Metabolic Process (GO:0009404)	1/1	0.0204429	0.479625	0	0	Infinity	Infinity	FMO4
Cellular Response to Glucose Stimulus (GO:0071333)	3/29	0.0208541	0.479625	0	0	5.581065088757397	21.599853963871677	MLXIPL;GAS6;AGER
Regulation of Endothelial Cell Apoptotic Process (GO:2000351)	3/30	0.0228292	0.479625	0	0	5.3739316239316235	20.311925045684895	IL11;GAS6;ICAM1
Regulation of Oxidative Phosphorylation (GO:0002082)	2/12	0.0240055	0.479625	0	0	9.649042145593869	35.98584249294519	MLXIPL;ACTN3
Resolution of Meiotic Recombination Intermediates (GO:0000712)	2/12	0.0240055	0.479625	0	0	9.649042145593869	35.98584249294519	EME1;MEIOB
+ Reg of Myeloid Leukocyte Cytokine Production Inv in Imm Resp (GO:0061081)	2/12	0.0240055	0.479625	0	0	9.649042145593869	35.98584249294519	PLCG2;TICAM1
Protein Localization to Cell-Cell Junction (GO:0150105)	2/12	0.0240055	0.479625	0	0	9.649042145593869	35.98584249294519	F11R;TJP3
Regulation of Cell Communication by Electrical Coupling (GO:0010649)	2/12	0.0240055	0.479625	0	0	9.649042145593869	35.98584249294519	HRC;TRDN
Negative Regulation of Calcium Ion Transmembrane Transporter Activity (GO:1901020)	2/12	0.0240055	0.479625	0	0	9.649042145593869	35.98584249294519	CACNA1F;TRDN
Regulation of Actin Filament-Based Process (GO:0032970)	5/81	0.0250261	0.479625	0	0	3.1941044471644227	11.779330159925147	BCAS3;HCK;PDGFA;F11R;NGEF
Muscle Contraction (GO:0006936)	4/56	0.0273456	0.479625	0	0	3.7273537273537274	13.415491103221669	KCNIP1;HRC;TNNI3;TRDN
Negative Regulation of Interleukin-1 Production (GO:0032692)	2/13	0.0279928	0.479625	0	0	8.77115987460815	31.363981637922333	SERPINB1;GAS6
Regulation of Megakaryocyte Differentiation (GO:0045652)	2/13	0.0279928	0.479625	0	0	8.77115987460815	31.363981637922333	L3MBTL1;FAXDC2
Female Meiotic Nuclear Division (GO:0007143)	2/13	0.0279928	0.479625	0	0	8.77115987460815	31.363981637922333	MEIOC;MEIOB
Monoatomic Cation Transmembrane Transport (GO:0098655)	8/177	0.0291002	0.479625	0	0	2.3080171713655875	8.163479705935613	SLC24A1;GRIN3B;ABCC8;P2RX2;HPN;ATP2B4;ATP6V0A4;GAS6
Regulation of Actin Cytoskeleton Organization (GO:0032956)	5/86	0.0313695	0.479625	0	0	2.9957412192554314	10.37101337845799	BCAS3;HCK;PDGFA;F11R;NGEF
Regulation of Phagocytosis (GO:0050764)	3/34	0.0317098	0.479625	0	0	4.679032258064516	16.147952344421032	HCK;SYT12;GAS6
Negative Regulation of Interleukin-6 Production (GO:0032715)	2/14	0.0322247	0.479625	0	0	8.039591315453384	27.61617773033074	SYT12;GAS6
Sensory Perception of Sound (GO:0007605)	4/60	0.0341041	0.479625	0	0	3.4600110314396026	11.689090297628402	P2RX2;HPN;ATP2B4;ATP6V0A4
Regulation of Calcium Ion Transport (GO:0051924)	3/35	0.0341734	0.479625	0	0	4.532451923076923	15.302954039648759	GRIN3B;CREB3L4;HRC
Regulation of Rho Protein Signal Transduction (GO:0035023)	4/61	0.0359321	0.479625	0	0	3.3990381358802413	11.305621486523785	ADGRG1;MCF2L;ARHGEF2;F11R
Calcium Ion Import Across Plasma Membrane (GO:0098703)	2/15	0.0366895	0.479625	0	0	7.420571765399352	24.526947440729803	SLC24A1;CACNA1F
Calcium Ion Import Into Cytosol (GO:1902656)	2/15	0.0366895	0.479625	0	0	7.420571765399352	24.526947440729803	SLC24A1;CACNA1F
Regulation of Smooth Muscle Cell Migration (GO:0014910)	2/15	0.0366895	0.479625	0	0	7.420571765399352	24.526947440729803	IGFBP5;PDGFA
Positive Regulation of Muscle Cell Differentiation (GO:0051149)	2/15	0.0366895	0.479625	0	0	7.420571765399352	24.526947440729803	OLFM2;NID1
Leukocyte Cell-Cell Adhesion (GO:0007159)	2/15	0.0366895	0.479625	0	0	7.420571765399352	24.526947440729803	F11R;ICAM1
Calcium Ion Homeostasis (GO:0055074)	4/62	0.0378158	0.479625	0	0	3.3401677539608574	10.93913985213322	SLC24A1;ATP2B4;TNNI3;TRDN
Vascular Transport (GO:0010232)	4/62	0.0378158	0.479625	0	0	3.3401677539608574	10.93913985213322	SLC27A1;ATP2B4;ATP1B2;AGER
Collagen Fibril Organization (GO:0030199)	3/37	0.039389	0.479625	0	0	4.265158371040724	13.794666071373948	COL1A2;PLOD1;LOXL1
Regulation of Intracellular Signal Transduction (GO:1902531)	10/258	0.0395549	0.479625	0	0	1.9689532066811168	6.359850318110313	PLEKHG4;DNMBP;ARHGEF25;MCF2L;PLEKHG5;PLEKHG4B;PLCG2;ARHGEF2;AGER;NGEF
Calcium Ion Transmembrane Transport (GO:0070588)	4/63	0.0397553	0.479625	0	0	3.2832929782082325	10.588658699366183	SLC24A1;P2RX2;ATP2B4;GAS6
Transport Across Blood-Brain Barrier (GO:0150104)	4/63	0.0397553	0.479625	0	0	3.2832929782082325	10.588658699366183	SLC27A1;ATP2B4;ATP1B2;AGER
Negative Regulation of Dendritic Cell Apoptotic Process (GO:2000669)	1/2	0.0404696	0.479625	0	0	48.095419847328245	154.25188826825976	GAS6
Regulation of Dendritic Cell Chemotaxis (GO:2000508)	1/2	0.0404696	0.479625	0	0	48.095419847328245	154.25188826825976	GAS6
Negative Regulation of Insulin-Like Growth Factor Receptor Signaling Pathway (GO:0043569)	1/2	0.0404696	0.479625	0	0	48.095419847328245	154.25188826825976	IGFBP5
Negative Regulation of Steroid Metabolic Process (GO:0045939)	1/2	0.0404696	0.479625	0	0	48.095419847328245	154.25188826825976	WNT4
Antifungal Innate Immune Response (GO:0061760)	1/2	0.0404696	0.479625	0	0	48.095419847328245	154.25188826825976	PLCG2
Positive Regulation of Dendritic Cell Chemotaxis (GO:2000510)	1/2	0.0404696	0.479625	0	0	48.095419847328245	154.25188826825976	GAS6
Positive Regulation of Monocyte Chemotactic Protein-1 Production (GO:0071639)	1/2	0.0404696	0.479625	0	0	48.095419847328245	154.25188826825976	OAS3
Positive Regulation of Neuroinflammatory Response (GO:0150078)	1/2	0.0404696	0.479625	0	0	48.095419847328245	154.25188826825976	PLCG2
Interleukin-27-Mediated Signaling Pathway (GO:0070106)	1/2	0.0404696	0.479625	0	0	48.095419847328245	154.25188826825976	OAS3
Mesenchymal Cell Differentiation Involved in Kidney Development (GO:0072161)	1/2	0.0404696	0.479625	0	0	48.095419847328245	154.25188826825976	WNT4
Fc Receptor Mediated Stimulatory Signaling Pathway (GO:0002431)	2/16	0.0413761	0.479625	0	0	6.889983579638752	21.944949408666286	HCK;PLA2G6
Fc-gamma Receptor Signaling Pathway Involved in Phagocytosis (GO:0038096)	2/16	0.0413761	0.479625	0	0	6.889983579638752	21.944949408666286	HCK;PLA2G6
Positive Regulation of Leukocyte Migration (GO:0002687)	2/16	0.0413761	0.479625	0	0	6.889983579638752	21.944949408666286	MADCAM1;ICAM1
Male Meiotic Nuclear Division (GO:0007140)	2/16	0.0413761	0.479625	0	0	6.889983579638752	21.944949408666286	MEIOC;MEIOB
Positive Regulation of ERK1 and ERK2 Cascade (GO:0070374)	5/93	0.0418102	0.479625	0	0	2.7559020436927413	8.74892746994881	NECAB2;PDGFA;GAS6;AGER;ICAM1
Positive Regulation of Small GTPase Mediated Signal Transduction (GO:0051057)	3/39	0.044984	0.479625	0	0	4.027564102564103	12.491285589378467	ADGRG1;MCF2L;F11R
Positive Regulation of G Protein-Coupled Receptor Signaling Pathway (GO:0045745)	2/17	0.0462736	0.479625	0	0	6.430140485312899	19.760998201069714	NECAB2;KLK6
Positive Regulation of Amide Metabolic Process (GO:0034250)	2/17	0.0462736	0.479625	0	0	6.430140485312899	19.760998201069714	GSAP;PLA2G6
Positive Regulation of Amyloid Precursor Protein Catabolic Process (GO:1902993)	2/17	0.0462736	0.479625	0	0	6.430140485312899	19.760998201069714	GSAP;AGER
Synaptic Transmission, Glutamatergic (GO:0035249)	2/17	0.0462736	0.479625	0	0	6.430140485312899	19.760998201069714	GRIN3B;GRIK3
Positive Regulation of Mononuclear Cell Migration (GO:0071677)	2/17	0.0462736	0.479625	0	0	6.430140485312899	19.760998201069714	CREB3L4;GAS6
Regulation of Cell Cycle G1/S Phase Transition (GO:1902806)	4/67	0.0480707	0.479625	0	0	3.073849359563645	9.32938528072924	KLF11;MN1;PLCG2;ATP2B4
Monocarboxylic Acid Metabolic Process (GO:0032787)	4/68	0.0502887	0.479625	0	0	3.0255791505791505	9.046407497590335	ACBD4;LDHD;ACADSB;ACSF2
Fc-gamma Receptor Signaling Pathway (GO:0038094)	2/18	0.0513715	0.479625	0	0	6.027777777777778	17.894491326533135	HCK;PLA2G6
Regulation of Nuclear Division (GO:0051783)	2/18	0.0513715	0.479625	0	0	6.027777777777778	17.894491326533135	CUL9;L3MBTL1
Nucleic Acid Metabolic Process (GO:0090304)	2/18	0.0513715	0.479625	0	0	6.027777777777778	17.894491326533135	RECQL5;DNASE1L1
Regulation of Vascular Endothelial Growth Factor Signaling Pathway (GO:1900746)	2/18	0.0513715	0.479625	0	0	6.027777777777778	17.894491326533135	ADGRG1;TNXB
Axonogenesis (GO:0007409)	7/165	0.052874	0.479625	0	0	2.153579905063291	6.33118808866462	ROBO3;PLEKHG4;ARHGEF25;PLEKHG4B;ULK2;EPHB1;SPG11
Fc-epsilon Receptor Signaling Pathway (GO:0038095)	2/19	0.0566596	0.479625	0	0	5.6727518593644355	16.284731848109683	MAPK10;PLCG2
Nuclear Receptor-Mediated Signaling Pathway (GO:0141193)	2/19	0.0566596	0.479625	0	0	5.6727518593644355	16.284731848109683	CALCOCO1;PDK3
Positive Regulation of Fibroblast Proliferation (GO:0048146)	2/19	0.0566596	0.479625	0	0	5.6727518593644355	16.284731848109683	PDGFA;GAS6
Regulation of Blood Circulation (GO:1903522)	2/19	0.0566596	0.479625	0	0	5.6727518593644355	16.284731848109683	KCNIP1;AGER
Phospholipid Transport (GO:0015914)	3/43	0.0572806	0.479625	0	0	3.623653846153846	10.362902897244306	ATP8B3;ABCA3;ATP11A
Regulation of Complement-Dependent Cytotoxicity (GO:1903659)	1/3	0.0600883	0.479625	0	0	24.045801526717558	67.61535525319093	IL11
B Cell Chemotaxis (GO:0035754)	1/3	0.0600883	0.479625	0	0	24.045801526717558	67.61535525319093	GAS6
Regulation of Interleukin-23 Production (GO:0032667)	1/3	0.0600883	0.479625	0	0	24.045801526717558	67.61535525319093	PLCG2
Regulation of Leukocyte Mediated Cytotoxicity (GO:0001910)	1/3	0.0600883	0.479625	0	0	24.045801526717558	67.61535525319093	ICAM1
Regulation of Male Gonad Development (GO:2000018)	1/3	0.0600883	0.479625	0	0	24.045801526717558	67.61535525319093	WNT4
Regulation of Monocyte Chemotactic Protein-1 Production (GO:0071637)	1/3	0.0600883	0.479625	0	0	24.045801526717558	67.61535525319093	OAS3
Cell Differentiation Involved in Metanephros Development (GO:0072202)	1/3	0.0600883	0.479625	0	0	24.045801526717558	67.61535525319093	WNT4
Cellular Response to Interferon-Alpha (GO:0035457)	1/3	0.0600883	0.479625	0	0	24.045801526717558	67.61535525319093	GAS6
Positive Regulation of Endothelial Cell Development (GO:1901552)	1/3	0.0600883	0.479625	0	0	24.045801526717558	67.61535525319093	F11R
Positive Regulation of Establishment of Endothelial Barrier (GO:1903142)	1/3	0.0600883	0.479625	0	0	24.045801526717558	67.61535525319093	F11R
Positive Regulation of Hormone Metabolic Process (GO:0032352)	1/3	0.0600883	0.479625	0	0	24.045801526717558	67.61535525319093	HPN
Positive Regulation of Interleukin-23 Production (GO:0032747)	1/3	0.0600883	0.479625	0	0	24.045801526717558	67.61535525319093	PLCG2
Ethanol Catabolic Process (GO:0006068)	1/3	0.0600883	0.479625	0	0	24.045801526717558	67.61535525319093	SULT1C4
Ethanol Metabolic Process (GO:0006067)	1/3	0.0600883	0.479625	0	0	24.045801526717558	67.61535525319093	SULT1C4
Type B Pancreatic Cell Proliferation (GO:0044342)	1/3	0.0600883	0.479625	0	0	24.045801526717558	67.61535525319093	SERPINB1
Tyrosine Metabolic Process (GO:0006570)	1/3	0.0600883	0.479625	0	0	24.045801526717558	67.61535525319093	PAH
Gas Transport (GO:0015669)	1/3	0.0600883	0.479625	0	0	24.045801526717558	67.61535525319093	MB
Humoral Immune Response Mediated by Circulating Immunoglobulin (GO:0002455)	1/3	0.0600883	0.479625	0	0	24.045801526717558	67.61535525319093	C1R
Interleukin-5-Mediated Signaling Pathway (GO:0038043)	1/3	0.0600883	0.479625	0	0	24.045801526717558	67.61535525319093	STAT5A
Regulation of Cardiac Muscle Hypertrophy in Response to Stress (GO:1903242)	1/3	0.0600883	0.479625	0	0	24.045801526717558	67.61535525319093	ATP2B4
Negative Regulation of Cardiac Muscle Adaptation (GO:0010616)	1/3	0.0600883	0.479625	0	0	24.045801526717558	67.61535525319093	ATP2B4
Negative Regulation of Cardiac Muscle Hypertrophy in Response to Stress (GO:1903243)	1/3	0.0600883	0.479625	0	0	24.045801526717558	67.61535525319093	ATP2B4
Cellular Response to Calcium Ion (GO:0071277)	3/44	0.0605786	0.479625	0	0	3.5349906191369604	9.911455463831619	PLCG2;DPEP1;RASGRP2
Homophilic Cell Adhesion via Plasma Membrane Adhesion Molecules (GO:0007156)	3/44	0.0605786	0.479625	0	0	3.5349906191369604	9.911455463831619	ROBO3;SDK1;SDK2
Negative Regulation of Small Molecule Metabolic Process (GO:0062014)	2/20	0.0621281	0.479625	0	0	5.3571732652192425	14.885211160842454	ATP2B4;WNT4
Cardiac Muscle Contraction (GO:0060048)	2/20	0.0621281	0.479625	0	0	5.3571732652192425	14.885211160842454	GAA;TNNI3
Lipid Translocation (GO:0034204)	2/20	0.0621281	0.479625	0	0	5.3571732652192425	14.885211160842454	ATP8B3;ATP11A
Regulation of Cardiac Muscle Contraction by Calcium Ion Signaling (GO:0010882)	2/20	0.0621281	0.479625	0	0	5.3571732652192425	14.885211160842454	HRC;TNNI3
Fat Cell Differentiation (GO:0045444)	3/45	0.0639636	0.479625	0	0	3.4505494505494507	9.487083134430822	CLIP3;IL11;ZNF516
Inorganic Cation Transmembrane Transport (GO:0098662)	7/174	0.0664287	0.479625	0	0	2.036045097305389	5.520993079631264	SLC24A1;ABCC8;P2RX2;HPN;ATP2B4;ATP6V0A4;GAS6
Negative Regulation of Tumor Necrosis Factor Production (GO:0032720)	2/21	0.0677674	0.479625	0	0	5.074813470457753	13.659741956027286	SYT12;GAS6
Blood Circulation (GO:0008015)	2/21	0.0677674	0.479625	0	0	5.074813470457753	13.659741956027286	TNNI3;TRDN
Regulation of Release of Sequestered Calcium Ion Into Cytosol by Sarcoplasmic Reticulum (GO:0010880)	2/21	0.0677674	0.479625	0	0	5.074813470457753	13.659741956027286	HRC;TRDN
Regulation of Transmembrane Receptor Protein Serine/Threonine Kinase Signaling Pathway (GO:0090092)	2/21	0.0677674	0.479625	0	0	5.074813470457753	13.659741956027286	LTBP4;FSTL1
Toll-Like Receptor Signaling Pathway (GO:0002224)	2/21	0.0677674	0.479625	0	0	5.074813470457753	13.659741956027286	PLCG2;TICAM1
Maintenance of Blood-Brain Barrier (GO:0035633)	2/21	0.0677674	0.479625	0	0	5.074813470457753	13.659741956027286	F11R;TJP3
Regulation of Calcium-Mediated Signaling (GO:0050848)	2/21	0.0677674	0.479625	0	0	5.074813470457753	13.659741956027286	P2RX2;PLCG2
Fc Receptor Signaling Pathway (GO:0038093)	2/22	0.0735684	0.479625	0	0	4.820689655172414	12.579781598303379	MAPK10;PLCG2
Negative Regulation of Tumor Necrosis Factor Superfamily Cytokine Production (GO:1903556)	2/22	0.0735684	0.479625	0	0	4.820689655172414	12.579781598303379	SYT12;GAS6
Cellular Response to Amyloid-Beta (GO:1904646)	2/22	0.0735684	0.479625	0	0	4.820689655172414	12.579781598303379	AGER;ICAM1
Positive Regulation of Defense Response to Virus by Host (GO:0002230)	2/22	0.0735684	0.479625	0	0	4.820689655172414	12.579781598303379	CREB3L4;ZDHHC11
Regulation of Calcium Ion Transmembrane Transport (GO:1903169)	2/22	0.0735684	0.479625	0	0	4.820689655172414	12.579781598303379	HRC;TRDN
Calcium Ion Transmembrane Import Into Cytosol (GO:0097553)	3/48	0.0746264	0.479625	0	0	3.2197435897435898	8.356075052939179	SLC24A1;PLCG2;CACNA1F
Cellular Response to Metal Ion (GO:0071248)	4/78	0.0754759	0.479625	0	0	2.6146300740895336	6.756051508079682	PLCG2;DPEP1;RASGRP2;ADCY7
Neuron Projection Guidance (GO:0097485)	5/111	0.0772826	0.479625	0	0	2.2846277607137635	5.84930057360875	ROBO3;PLEKHG4;ARHGEF25;PLEKHG4B;EPHB1
Regulation of Protein Phosphorylation (GO:0001932)	5/111	0.0772826	0.479625	0	0	2.2846277607137635	5.84930057360875	CLIP3;KDM4D;FAXDC2;PDGFA;GAS6
Regulation of Dendritic Cell Apoptotic Process (GO:2000668)	1/4	0.0793074	0.479625	0	0	16.029262086513995	40.62494083641583	GAS6
Regulation of Dopamine Secretion (GO:0014059)	1/4	0.0793074	0.479625	0	0	16.029262086513995	40.62494083641583	SYT12
L-histidine Catabolic Process (GO:0006548)	1/4	0.0793074	0.479625	0	0	16.029262086513995	40.62494083641583	CARNS1
L-histidine Metabolic Process (GO:0006547)	1/4	0.0793074	0.479625	0	0	16.029262086513995	40.62494083641583	CARNS1
NADPH Oxidation (GO:0070995)	1/4	0.0793074	0.479625	0	0	16.029262086513995	40.62494083641583	FMO4
RIG-I Signaling Pathway (GO:0039529)	1/4	0.0793074	0.479625	0	0	16.029262086513995	40.62494083641583	OAS3
Negative Regulation of Osteoblast Proliferation (GO:0033689)	1/4	0.0793074	0.479625	0	0	16.029262086513995	40.62494083641583	MN1
Negative Regulation of Skeletal Muscle Cell Differentiation (GO:2001015)	1/4	0.0793074	0.479625	0	0	16.029262086513995	40.62494083641583	EPHB1
Neurotransmitter Receptor Diffusion Trapping (GO:0099628)	1/4	0.0793074	0.479625	0	0	16.029262086513995	40.62494083641583	CACNG8
Axo-Dendritic Transport (GO:0008088)	1/4	0.0793074	0.479625	0	0	16.029262086513995	40.62494083641583	SPG11
Nitric oxide-cGMP-mediated Signaling (GO:0038060)	1/4	0.0793074	0.479625	0	0	16.029262086513995	40.62494083641583	ATP2B4
Brown Fat Cell Differentiation (GO:0050873)	1/4	0.0793074	0.479625	0	0	16.029262086513995	40.62494083641583	ZNF516
Regulation of Relaxation of Cardiac Muscle (GO:1901897)	1/4	0.0793074	0.479625	0	0	16.029262086513995	40.62494083641583	HRC
Regulation of Response to Nutrient Levels (GO:0032107)	1/4	0.0793074	0.479625	0	0	16.029262086513995	40.62494083641583	PRKCG
Organic Acid Metabolic Process (GO:0006082)	1/4	0.0793074	0.479625	0	0	16.029262086513995	40.62494083641583	FMO4
Regulation of Sensory Perception (GO:0051931)	1/4	0.0793074	0.479625	0	0	16.029262086513995	40.62494083641583	ZFHX2
Regulation of Sensory Perception of Pain (GO:0051930)	1/4	0.0793074	0.479625	0	0	16.029262086513995	40.62494083641583	ZFHX2
Regulation of Skeletal Muscle Satellite Cell Proliferation (GO:0014842)	1/4	0.0793074	0.479625	0	0	16.029262086513995	40.62494083641583	EPHB1
Regulation of Sodium Ion Export Across Plasma Membrane (GO:1903276)	1/4	0.0793074	0.479625	0	0	16.029262086513995	40.62494083641583	ATP1B2
Cellular Response to Nitric Oxide (GO:0071732)	1/4	0.0793074	0.479625	0	0	16.029262086513995	40.62494083641583	DPEP1
Cellular Response to Reactive Nitrogen Species (GO:1902170)	1/4	0.0793074	0.479625	0	0	16.029262086513995	40.62494083641583	DPEP1
Detection of Temperature Stimulus Involved in Sensory Perception (GO:0050961)	1/4	0.0793074	0.479625	0	0	16.029262086513995	40.62494083641583	EPHB1
Detection of Temperature Stimulus Involved in Sensory Perception of Pain (GO:0050965)	1/4	0.0793074	0.479625	0	0	16.029262086513995	40.62494083641583	EPHB1
Sulfur Amino Acid Catabolic Process (GO:0000098)	1/4	0.0793074	0.479625	0	0	16.029262086513995	40.62494083641583	MAT1A
Thrombopoietin-Mediated Signaling Pathway (GO:0038163)	1/4	0.0793074	0.479625	0	0	16.029262086513995	40.62494083641583	STAT5A
Glutathione Catabolic Process (GO:0006751)	1/4	0.0793074	0.479625	0	0	16.029262086513995	40.62494083641583	DPEP1
Imidazole-Containing Compound Catabolic Process (GO:0052805)	1/4	0.0793074	0.479625	0	0	16.029262086513995	40.62494083641583	CARNS1
Positive Regulation of Sodium Ion Export Across Plasma Membrane (GO:1903278)	1/4	0.0793074	0.479625	0	0	16.029262086513995	40.62494083641583	ATP1B2
Interleukin-3-Mediated Signaling Pathway (GO:0038156)	1/4	0.0793074	0.479625	0	0	16.029262086513995	40.62494083641583	STAT5A
Positive Regulation of Vitamin D Receptor Signaling Pathway (GO:0070564)	1/4	0.0793074	0.479625	0	0	16.029262086513995	40.62494083641583	MN1
Lactate Metabolic Process (GO:0006089)	1/4	0.0793074	0.479625	0	0	16.029262086513995	40.62494083641583	LDHD
Postsynaptic Neurotransmitter Receptor Diffusion Trapping (GO:0098970)	1/4	0.0793074	0.479625	0	0	16.029262086513995	40.62494083641583	CACNG8
Primary Alcohol Catabolic Process (GO:0034310)	1/4	0.0793074	0.479625	0	0	16.029262086513995	40.62494083641583	SULT1C4
Metanephric Mesenchyme Development (GO:0072075)	1/4	0.0793074	0.479625	0	0	16.029262086513995	40.62494083641583	WNT4
Pyruvate Decarboxylation to acetyl-CoA (GO:0006086)	1/4	0.0793074	0.479625	0	0	16.029262086513995	40.62494083641583	LDHD
Regulation of G Protein-Coupled Receptor Internalization (GO:1904020)	1/4	0.0793074	0.479625	0	0	16.029262086513995	40.62494083641583	NECAB2
Regulation of acyl-CoA Biosynthetic Process (GO:0050812)	1/4	0.0793074	0.479625	0	0	16.029262086513995	40.62494083641583	PDK3
Negative Regulation of T-helper 17 Cell Lineage Commitment (GO:2000329)	1/4	0.0793074	0.479625	0	0	16.029262086513995	40.62494083641583	STAT5A
Regulation of Cardiac Muscle Cell Membrane Potential (GO:0086036)	1/4	0.0793074	0.479625	0	0	16.029262086513995	40.62494083641583	TRDN
Regulation of Cellular Extravasation (GO:0002691)	1/4	0.0793074	0.479625	0	0	16.029262086513995	40.62494083641583	ICAM1
Negative Regulation of Cell Fate Commitment (GO:0010454)	1/4	0.0793074	0.479625	0	0	16.029262086513995	40.62494083641583	STAT5A
Regulation of Metal Ion Transport (GO:0010959)	2/23	0.0795221	0.479625	0	0	4.590768108009487	11.622541195896758	NKAIN4;GRIN3B
Positive Regulation of Chemokine Production (GO:0032722)	2/23	0.0795221	0.479625	0	0	4.590768108009487	11.622541195896758	OAS3;AGER
Regulation of calcineurin-NFAT Signaling Cascade (GO:0070884)	2/23	0.0795221	0.479625	0	0	4.590768108009487	11.622541195896758	PLCG2;ATP2B4
Negative Regulation of Cell Migration (GO:0030336)	6/147	0.0811863	0.479625	0	0	2.0632502690620083	5.180840069062321	ADGRG1;SERPINB1;IGFBP5;DPEP1;FIGNL2;ATP1B2
Regulation of Heart Contraction (GO:0008016)	3/50	0.0821432	0.479625	0	0	3.0822422258592472	7.703421750638279	KCNIP1;ATP2B4;HRC
Regulation of Cell Communication (GO:0010646)	3/50	0.0821432	0.479625	0	0	3.0822422258592472	7.703421750638279	KCNIP1;SCG5;TRDN
Positive Regulation of Signal Transduction (GO:0009967)	7/185	0.085601	0.479625	0	0	1.9085323033707866	4.691283070918286	NECAB2;ADGRG1;TNXB;GAS6;NID1;GAS8;KLK6
Positive Regulation of Catalytic Activity (GO:0043085)	2/24	0.0856199	0.479625	0	0	4.3817485196795545	10.769625118601605	BCAS3;CREB3L4
Interferon-Mediated Signaling Pathway (GO:0140888)	2/24	0.0856199	0.479625	0	0	4.3817485196795545	10.769625118601605	HCK;OAS3
Regulation of Cytoskeleton Organization (GO:0051493)	5/116	0.0893257	0.479625	0	0	2.1808436343320063	5.2677543886575995	BCAS3;HCK;PDGFA;F11R;NGEF
Regulation of ERK1 and ERK2 Cascade (GO:0070372)	6/151	0.0896104	0.479625	0	0	2.0056889843016235	4.838290555403763	NECAB2;PDGFA;GAS6;EPHB1;AGER;ICAM1
Regulation of Cytosolic Calcium Ion Concentration (GO:0051480)	2/25	0.0918535	0.479625	0	0	4.190904547726137	10.006035995257056	ATP2B4;HRC
Protein Localization to Cell Junction (GO:1902414)	2/25	0.0918535	0.479625	0	0	4.190904547726137	10.006035995257056	NPHS1;TJP3
Protein Processing (GO:0016485)	4/84	0.0931182	0.479625	0	0	2.4173745173745176	5.738571048400457	C1R;C1RL;ECEL1;KLK6
Small GTPase-mediated Signal Transduction (GO:0007264)	6/153	0.093995	0.479625	0	0	1.9780830620185819	4.677205416495556	ABR;ADGRG1;COL1A2;PLEKHG5;RGL3;RASGRP2
Fatty Acid Metabolic Process (GO:0006631)	4/85	0.0962338	0.479625	0	0	2.387339720673054	5.588702690253023	SLC27A1;ACBD4;ACADSB;ACSF2
Negative Regulation of Collateral Sprouting (GO:0048671)	1/5	0.098135	0.479625	0	0	12.020992366412214	27.90566473096447	ULK2
Regulation of Collagen Fibril Organization (GO:1904026)	1/5	0.098135	0.479625	0	0	12.020992366412214	27.90566473096447	TNXB
Regulation of Cortisol Biosynthetic Process (GO:2000064)	1/5	0.098135	0.479625	0	0	12.020992366412214	27.90566473096447	WNT4
Negative Regulation of Dendritic Spine Development (GO:0061000)	1/5	0.098135	0.479625	0	0	12.020992366412214	27.90566473096447	NGEF
Negative Regulation of Glial Cell Apoptotic Process (GO:0034351)	1/5	0.098135	0.479625	0	0	12.020992366412214	27.90566473096447	GAS6
Negative Regulation of Hormone Secretion (GO:0046888)	1/5	0.098135	0.479625	0	0	12.020992366412214	27.90566473096447	IL11
Regulation of Glomerular Filtration (GO:0003093)	1/5	0.098135	0.479625	0	0	12.020992366412214	27.90566473096447	GAS6
Negative Regulation of Microglial Cell Activation (GO:1903979)	1/5	0.098135	0.479625	0	0	12.020992366412214	27.90566473096447	SYT12
Regulation of Microtubule Binding (GO:1904526)	1/5	0.098135	0.479625	0	0	12.020992366412214	27.90566473096447	GAS8
Calcitonin Family Receptor Signaling Pathway (GO:0097646)	1/5	0.098135	0.479625	0	0	12.020992366412214	27.90566473096447	CALCRL
Catecholamine Metabolic Process (GO:0006584)	1/5	0.098135	0.479625	0	0	12.020992366412214	27.90566473096447	PAH
Phosphatidylcholine Catabolic Process (GO:0034638)	1/5	0.098135	0.479625	0	0	12.020992366412214	27.90566473096447	PLA2G6
Cellular Response to Interleukin-2 (GO:0071352)	1/5	0.098135	0.479625	0	0	12.020992366412214	27.90566473096447	STAT5A
Cellular Response to Interleukin-7 (GO:0098761)	1/5	0.098135	0.479625	0	0	12.020992366412214	27.90566473096447	STAT5A
Cellular Response to Interleukin-9 (GO:0071355)	1/5	0.098135	0.479625	0	0	12.020992366412214	27.90566473096447	STAT5A
Podocyte Development (GO:0072015)	1/5	0.098135	0.479625	0	0	12.020992366412214	27.90566473096447	NPHS1
Regulation of Vitamin D Receptor Signaling Pathway (GO:0070562)	1/5	0.098135	0.479625	0	0	12.020992366412214	27.90566473096447	MN1
Release of Sequestered Calcium Ion Into Cytosol by Sarcoplasmic Reticulum (GO:0014808)	1/5	0.098135	0.479625	0	0	12.020992366412214	27.90566473096447	TRDN
Cellular Response to Oxidised Low-Density Lipoprotein Particle Stimulus (GO:0140052)	1/5	0.098135	0.479625	0	0	12.020992366412214	27.90566473096447	TICAM1
Response to DNA Damage Checkpoint Signaling (GO:0072423)	1/5	0.098135	0.479625	0	0	12.020992366412214	27.90566473096447	EME1
Response to Yeast (GO:0001878)	1/5	0.098135	0.479625	0	0	12.020992366412214	27.90566473096447	PLCG2
Positive Regulation of Blood Circulation (GO:1903524)	1/5	0.098135	0.479625	0	0	12.020992366412214	27.90566473096447	HRC
Positive Regulation of Calcium Ion Transport Into Cytosol (GO:0010524)	1/5	0.098135	0.479625	0	0	12.020992366412214	27.90566473096447	P2RX2
Detection of Visible Light (GO:0009584)	1/5	0.098135	0.479625	0	0	12.020992366412214	27.90566473096447	PDE6B
Sulfation (GO:0051923)	1/5	0.098135	0.479625	0	0	12.020992366412214	27.90566473096447	SULT1C4
Taurine Metabolic Process (GO:0019530)	1/5	0.098135	0.479625	0	0	12.020992366412214	27.90566473096447	STAT5A
Tight Junction Organization (GO:0120193)	1/5	0.098135	0.479625	0	0	12.020992366412214	27.90566473096447	LNX1
Positive Regulation of Membrane Invagination (GO:1905155)	1/5	0.098135	0.479625	0	0	12.020992366412214	27.90566473096447	PLCG2
Vacuole Organization (GO:0007033)	1/5	0.098135	0.479625	0	0	12.020992366412214	27.90566473096447	SPG11
Positive Regulation of Myeloid Leukocyte Mediated Immunity (GO:0002888)	1/5	0.098135	0.479625	0	0	12.020992366412214	27.90566473096447	TICAM1
Glucan Catabolic Process (GO:0009251)	1/5	0.098135	0.479625	0	0	12.020992366412214	27.90566473096447	GAA
Positive Regulation of Protein Localization to Cilium (GO:1903566)	1/5	0.098135	0.479625	0	0	12.020992366412214	27.90566473096447	GAS8
Homocysteine Metabolic Process (GO:0050667)	1/5	0.098135	0.479625	0	0	12.020992366412214	27.90566473096447	DPEP1
Interleukin-2-Mediated Signaling Pathway (GO:0038110)	1/5	0.098135	0.479625	0	0	12.020992366412214	27.90566473096447	STAT5A
Interleukin-4-Mediated Signaling Pathway (GO:0035771)	1/5	0.098135	0.479625	0	0	12.020992366412214	27.90566473096447	STAT5A
Interleukin-7-Mediated Signaling Pathway (GO:0038111)	1/5	0.098135	0.479625	0	0	12.020992366412214	27.90566473096447	STAT5A
Interleukin-9-Mediated Signaling Pathway (GO:0038113)	1/5	0.098135	0.479625	0	0	12.020992366412214	27.90566473096447	STAT5A
Positive Regulation of Vascular Associated Smooth Muscle Cell Migration (GO:1904754)	1/5	0.098135	0.479625	0	0	12.020992366412214	27.90566473096447	IGFBP5
Long-Term Synaptic Depression (GO:0060292)	1/5	0.098135	0.479625	0	0	12.020992366412214	27.90566473096447	SLC24A1
Lymphocyte Apoptotic Process (GO:0070227)	1/5	0.098135	0.479625	0	0	12.020992366412214	27.90566473096447	EBF4
Marginal Zone B Cell Differentiation (GO:0002315)	1/5	0.098135	0.479625	0	0	12.020992366412214	27.90566473096447	MFNG
Protein Polyglutamylation (GO:0018095)	1/5	0.098135	0.479625	0	0	12.020992366412214	27.90566473096447	TTLL6
Regulation of MDA-5 Signaling Pathway (GO:0039533)	1/5	0.098135	0.479625	0	0	12.020992366412214	27.90566473096447	DDX60
Regulation of acetyl-CoA Biosynthetic Process From Pyruvate (GO:0010510)	1/5	0.098135	0.479625	0	0	12.020992366412214	27.90566473096447	PDK3
Regulation of Aldosterone Biosynthetic Process (GO:0032347)	1/5	0.098135	0.479625	0	0	12.020992366412214	27.90566473096447	WNT4
Regulation of Basement Membrane Organization (GO:0110011)	1/5	0.098135	0.479625	0	0	12.020992366412214	27.90566473096447	NID1
Negative Regulation of Axon Regeneration (GO:0048681)	1/5	0.098135	0.479625	0	0	12.020992366412214	27.90566473096447	FIGNL2
Negative Regulation of Catecholamine Secretion (GO:0033604)	1/5	0.098135	0.479625	0	0	12.020992366412214	27.90566473096447	SYT12
Regulation of Chemokine (C-C Motif) Ligand 5 Production (GO:0071649)	1/5	0.098135	0.479625	0	0	12.020992366412214	27.90566473096447	OAS3
Positive Regulation of MAPK Cascade (GO:0043410)	8/229	0.0982139	0.479625	0	0	1.7575725312749535	4.078636931859114	NECAB2;IL11;PLCG2;PDGFA;GAS6;AGER;ICAM1;WNT4
Phospholipid Translocation (GO:0045332)	2/26	0.0982149	0.479625	0	0	4.015964240102171	9.319436142489073	ATP8B3;ATP11A
Extracellular Matrix Disassembly (GO:0022617)	2/26	0.0982149	0.479625	0	0	4.015964240102171	9.319436142489073	HPN;KLK6
Glutamate Receptor Signaling Pathway (GO:0007215)	2/26	0.0982149	0.479625	0	0	4.015964240102171	9.319436142489073	GRIN3B;GRIK3
Regulation of Endocytosis (GO:0030100)	3/55	0.102271	0.479625	0	0	2.7847633136094676	6.349625298698797	CLIP3;HCK;SYT12
Regulation of Sodium Ion Transport (GO:0002028)	2/27	0.104696	0.479625	0	0	3.8550191570881225	8.699591917156965	NKAIN4;ATP2B4
Response to Amyloid-Beta (GO:1904645)	2/27	0.104696	0.479625	0	0	3.8550191570881225	8.699591917156965	AGER;ICAM1
Cellular Response to Nitrogen Compound (GO:1901699)	5/122	0.104983	0.479625	0	0	2.068011661034917	4.66121799060696	IGFBP5;ATP2B4;ARHGEF2;AGER;ICAM1
Negative Regulation of Neuron Apoptotic Process (GO:0043524)	3/56	0.106512	0.479625	0	0	2.73200290275762	6.118317712364755	PRKCG;TOX3;AGAP2
Negative Regulation of Secretion by Cell (GO:1903531)	2/28	0.11129	0.479625	0	0	3.7064544650751547	8.137950530899827	IL11;SYT12
Endothelial Cell Migration (GO:0043542)	2/28	0.11129	0.479625	0	0	3.7064544650751547	8.137950530899827	PLEKHG5;FSTL1
Positive Regulation of Phagocytosis (GO:0050766)	2/28	0.11129	0.479625	0	0	3.7064544650751547	8.137950530899827	PLCG2;GAS6
Regulation of Cell Cycle Phase Transition (GO:1901987)	2/28	0.11129	0.479625	0	0	3.7064544650751547	8.137950530899827	MN1;ATP2B4
Cellular Component Assembly (GO:0022607)	7/198	0.111918	0.479625	0	0	1.7767711060209423	3.8911040378715973	SYCE2;STAG3;REPS2;PDGFA;TLCD2;GAS6;GAS8
Negative Regulation of Multicellular Organismal Process (GO:0051241)	6/162	0.115115	0.479625	0	0	1.8626159832385514	4.026640228216762	TLE3;ACTN3;SYT12;HPN;GAS6;AGER
Phosphatidylinositol Metabolic Process (GO:0046488)	3/58	0.115196	0.479625	0	0	2.632237762237762	5.688591462800784	PITPNM3;PLCG2;OCRL
Sensory Perception of Mechanical Stimulus (GO:0050954)	3/58	0.115196	0.479625	0	0	2.632237762237762	5.688591462800784	P2RX2;ATP2B4;ATP6V0A4
Negative Regulation of Leukocyte Apoptotic Process (GO:2000107)	1/6	0.116579	0.479625	0	0	9.616030534351145	20.66663660617363	GAS6
IRE1-mediated Unfolded Protein Response (GO:0036498)	1/6	0.116579	0.479625	0	0	9.616030534351145	20.66663660617363	ERN2
Regulation of Hepatocyte Proliferation (GO:2000345)	1/6	0.116579	0.479625	0	0	9.616030534351145	20.66663660617363	HPN
MyD88-independent Toll-Like Receptor Signaling Pathway (GO:0002756)	1/6	0.116579	0.479625	0	0	9.616030534351145	20.66663660617363	TICAM1
Negative Regulation of Neuron Projection Regeneration (GO:0070571)	1/6	0.116579	0.479625	0	0	9.616030534351145	20.66663660617363	FIGNL2
Schwann Cell Development (GO:0014044)	1/6	0.116579	0.479625	0	0	9.616030534351145	20.66663660617363	LGI4
T Cell Apoptotic Process (GO:0070231)	1/6	0.116579	0.479625	0	0	9.616030534351145	20.66663660617363	EBF4
TRIF-dependent Toll-Like Receptor Signaling Pathway (GO:0035666)	1/6	0.116579	0.479625	0	0	9.616030534351145	20.66663660617363	TICAM1
Adrenal Gland Development (GO:0030325)	1/6	0.116579	0.479625	0	0	9.616030534351145	20.66663660617363	WNT4
Negative Regulation of Ryanodine-Sensitive Calcium-Release Channel Activity (GO:0060315)	1/6	0.116579	0.479625	0	0	9.616030534351145	20.66663660617363	TRDN
Negative Regulation of Steroid Biosynthetic Process (GO:0010894)	1/6	0.116579	0.479625	0	0	9.616030534351145	20.66663660617363	WNT4
Negative Regulation of Telomere Capping (GO:1904354)	1/6	0.116579	0.479625	0	0	9.616030534351145	20.66663660617363	ERCC1
Regulation of Podosome Assembly (GO:0071801)	1/6	0.116579	0.479625	0	0	9.616030534351145	20.66663660617363	HCK
Regulation of Protein ADP-ribosylation (GO:0010835)	1/6	0.116579	0.479625	0	0	9.616030534351145	20.66663660617363	ZNF83
cAMP Biosynthetic Process (GO:0006171)	1/6	0.116579	0.479625	0	0	9.616030534351145	20.66663660617363	ADCY7
Peripheral Nervous System Axon Ensheathment (GO:0032292)	1/6	0.116579	0.479625	0	0	9.616030534351145	20.66663660617363	LGI4
Peroxisome Proliferator Activated Receptor Signaling Pathway (GO:0035357)	1/6	0.116579	0.479625	0	0	9.616030534351145	20.66663660617363	PDK3
Phospholipid Homeostasis (GO:0055091)	1/6	0.116579	0.479625	0	0	9.616030534351145	20.66663660617363	TLCD2
Phototransduction, Visible Light (GO:0007603)	1/6	0.116579	0.479625	0	0	9.616030534351145	20.66663660617363	PDE6B
Cellular Response to Interleukin-15 (GO:0071350)	1/6	0.116579	0.479625	0	0	9.616030534351145	20.66663660617363	STAT5A
Platelet Activating Factor Metabolic Process (GO:0046469)	1/6	0.116579	0.479625	0	0	9.616030534351145	20.66663660617363	PLA2G6
Polyketide Metabolic Process (GO:0030638)	1/6	0.116579	0.479625	0	0	9.616030534351145	20.66663660617363	SULT1C4
Release of Sequestered Calcium Ion Into Cytosol by Endoplasmic Reticulum (GO:1903514)	1/6	0.116579	0.479625	0	0	9.616030534351145	20.66663660617363	TRDN
Cochlea Morphogenesis (GO:0090103)	1/6	0.116579	0.479625	0	0	9.616030534351145	20.66663660617363	HPN
Response to Thyroid Hormone (GO:0097066)	1/6	0.116579	0.479625	0	0	9.616030534351145	20.66663660617363	HPN
Retinal Ganglion Cell Axon Guidance (GO:0031290)	1/6	0.116579	0.479625	0	0	9.616030534351145	20.66663660617363	EPHB1
Detection of Stimulus Involved in Sensory Perception of Pain (GO:0062149)	1/6	0.116579	0.479625	0	0	9.616030534351145	20.66663660617363	EPHB1
Sodium-Independent Organic Anion Transport (GO:0043252)	1/6	0.116579	0.479625	0	0	9.616030534351145	20.66663660617363	SLCO1A2
Doxorubicin Metabolic Process (GO:0044598)	1/6	0.116579	0.479625	0	0	9.616030534351145	20.66663660617363	SULT1C4
Genomic Imprinting (GO:0071514)	1/6	0.116579	0.479625	0	0	9.616030534351145	20.66663660617363	CTCFL
Positive Regulation of Natural Killer Cell Activation (GO:0032816)	1/6	0.116579	0.479625	0	0	9.616030534351145	20.66663660617363	GAS6
Glomerular Epithelial Cell Development (GO:0072310)	1/6	0.116579	0.479625	0	0	9.616030534351145	20.66663660617363	NPHS1
Positive Regulation of Phagocytosis, Engulfment (GO:0060100)	1/6	0.116579	0.479625	0	0	9.616030534351145	20.66663660617363	PLCG2
Positive Regulation of Plasminogen Activation (GO:0010756)	1/6	0.116579	0.479625	0	0	9.616030534351145	20.66663660617363	HPN
Positive Regulation of Protein Autophosphorylation (GO:0031954)	1/6	0.116579	0.479625	0	0	9.616030534351145	20.66663660617363	PDGFA
Positive Regulation of Reactive Oxygen Species Biosynthetic Process (GO:1903428)	1/6	0.116579	0.479625	0	0	9.616030534351145	20.66663660617363	PLCG2
Induction of Positive Chemotaxis (GO:0050930)	1/6	0.116579	0.479625	0	0	9.616030534351145	20.66663660617363	CREB3L4
Positive Regulation of Smooth Muscle Cell Differentiation (GO:0051152)	1/6	0.116579	0.479625	0	0	9.616030534351145	20.66663660617363	OLFM2
Interleukin-15-Mediated Signaling Pathway (GO:0035723)	1/6	0.116579	0.479625	0	0	9.616030534351145	20.66663660617363	STAT5A
Mature B Cell Differentiation Involved in Immune Response (GO:0002313)	1/6	0.116579	0.479625	0	0	9.616030534351145	20.66663660617363	MFNG
Muscle Filament Sliding (GO:0030049)	1/6	0.116579	0.479625	0	0	9.616030534351145	20.66663660617363	TNNI3
Regulation of Blood-Brain Barrier Permeability (GO:1905603)	1/6	0.116579	0.479625	0	0	9.616030534351145	20.66663660617363	TJP3
Spermatid Development (GO:0007286)	2/29	0.117989	0.479625	0	0	3.5688945650631476	7.62731410505605	DDX25;MEIOC
Lytic Vacuole Organization (GO:0080171)	2/29	0.117989	0.479625	0	0	3.5688945650631476	7.62731410505605	GAA;SPG11
Pyruvate Metabolic Process (GO:0006090)	2/29	0.117989	0.479625	0	0	3.5688945650631476	7.62731410505605	LDHD;ENO3
Positive Regulation of Biosynthetic Process (GO:0009891)	3/59	0.119635	0.479625	0	0	2.5850274725274724	5.488819680802904	MLXIPL;PLCG2;WNT4
Positive Regulation of Synaptic Transmission (GO:0050806)	3/59	0.119635	0.479625	0	0	2.5850274725274724	5.488819680802904	SLC24A1;CACNG8;AGER
Cellular Response to Oxygen-Containing Compound (GO:1901701)	8/241	0.121652	0.479625	0	0	1.6654380207018429	3.5083981518900775	IGFBP5;ATP2B4;PDK3;DPEP1;ARHGEF2;TICAM1;AGER;ICAM1
Axon Guidance (GO:0007411)	5/128	0.121898	0.479625	0	0	1.9661876851326652	4.137982538449181	ROBO3;PLEKHG4;ARHGEF25;PLEKHG4B;EPHB1
Regulation of Defense Response to Virus by Host (GO:0050691)	2/30	0.124786	0.479625	0	0	3.441160372194855	7.161586019867043	CREB3L4;ZDHHC11
Double-Strand Break Repair (GO:0006302)	6/166	0.125211	0.479625	0	0	1.815466926070039	3.7720990693790633	RECQL5;EME1;KDM4D;ZNF83;ERCC1;MEIOB
Generation of Neurons (GO:0048699)	5/130	0.127804	0.479625	0	0	1.9344186046511629	3.979601069537587	EMX1;ATP2B4;LHX5;KIAA0319L;WNT4
Striated Muscle Contraction (GO:0006941)	2/31	0.131675	0.479625	0	0	3.3222354340071343	6.735571627428583	GAA;TNNI3
Positive Regulation of Leukocyte Chemotaxis (GO:0002690)	2/31	0.131675	0.479625	0	0	3.3222354340071343	6.735571627428583	CREB3L4;GAS6
Positive Regulation of Lipid Biosynthetic Process (GO:0046889)	2/31	0.131675	0.479625	0	0	3.3222354340071343	6.735571627428583	MLXIPL;SLC27A1
Autophagosome Organization (GO:1905037)	3/62	0.13332	0.479625	0	0	2.4529986962190353	4.942803091854408	ATG16L2;ULK2;SPG11
Positive Regulation of Protein Localization to Membrane (GO:1905477)	3/62	0.13332	0.479625	0	0	2.4529986962190353	4.942803091854408	CLIP3;NECAB2;ATP2B4
Regulation of Collateral Sprouting (GO:0048670)	1/7	0.134647	0.479625	0	0	8.012722646310433	16.0662844182027	ULK2
Regulation of Fibroblast Apoptotic Process (GO:2000269)	1/7	0.134647	0.479625	0	0	8.012722646310433	16.0662844182027	GAS6
Regulation of Glutamate Receptor Signaling Pathway (GO:1900449)	1/7	0.134647	0.479625	0	0	8.012722646310433	16.0662844182027	NECAB2
L-amino Acid Catabolic Process (GO:0170035)	1/7	0.134647	0.479625	0	0	8.012722646310433	16.0662844182027	CARNS1
Regulation of Glycoprotein Biosynthetic Process (GO:0010559)	1/7	0.134647	0.479625	0	0	8.012722646310433	16.0662844182027	NECAB2
Negative Regulation of Long-Term Synaptic Potentiation (GO:1900272)	1/7	0.134647	0.479625	0	0	8.012722646310433	16.0662844182027	AGER
Negative Regulation of Neuroinflammatory Response (GO:0150079)	1/7	0.134647	0.479625	0	0	8.012722646310433	16.0662844182027	SYT12
Actin-Myosin Filament Sliding (GO:0033275)	1/7	0.134647	0.479625	0	0	8.012722646310433	16.0662844182027	TNNI3
Activation of Protein Kinase B Activity (GO:0032148)	1/7	0.134647	0.479625	0	0	8.012722646310433	16.0662844182027	GAS6
Regulation of Microglial Cell Activation (GO:1903978)	1/7	0.134647	0.479625	0	0	8.012722646310433	16.0662844182027	SYT12
Negative Regulation of Release of Sequestered Calcium Ion Into Cytosol (GO:0051280)	1/7	0.134647	0.479625	0	0	8.012722646310433	16.0662844182027	TRDN
Regulation of Phagocytosis, Engulfment (GO:0060099)	1/7	0.134647	0.479625	0	0	8.012722646310433	16.0662844182027	PLCG2
Regulation of Protein Localization to Cilium (GO:1903564)	1/7	0.134647	0.479625	0	0	8.012722646310433	16.0662844182027	GAS8
Catecholamine Biosynthetic Process (GO:0042423)	1/7	0.134647	0.479625	0	0	8.012722646310433	16.0662844182027	PAH
Regulation of Steroid Biosynthetic Process (GO:0050810)	1/7	0.134647	0.479625	0	0	8.012722646310433	16.0662844182027	WNT4
Peptidyl-Lysine Hydroxylation (GO:0017185)	1/7	0.134647	0.479625	0	0	8.012722646310433	16.0662844182027	PLOD1
Central Nervous System Neuron Axonogenesis (GO:0021955)	1/7	0.134647	0.479625	0	0	8.012722646310433	16.0662844182027	EPHB1
Positive Regulation of RIG-I Signaling Pathway (GO:1900246)	1/7	0.134647	0.479625	0	0	8.012722646310433	16.0662844182027	DDX60
Response to Nitric Oxide (GO:0071731)	1/7	0.134647	0.479625	0	0	8.012722646310433	16.0662844182027	DPEP1
Retina Homeostasis (GO:0001895)	1/7	0.134647	0.479625	0	0	8.012722646310433	16.0662844182027	ATP1B2
Sarcoplasmic Reticulum Calcium Ion Transport (GO:0070296)	1/7	0.134647	0.479625	0	0	8.012722646310433	16.0662844182027	TRDN
Skin Morphogenesis (GO:0043589)	1/7	0.134647	0.479625	0	0	8.012722646310433	16.0662844182027	COL1A2
Positive Regulation of Chromatin Binding (GO:0035563)	1/7	0.134647	0.479625	0	0	8.012722646310433	16.0662844182027	KDM4D
Positive Regulation of Cytokine Production Involved in Inflammatory Response (GO:1900017)	1/7	0.134647	0.479625	0	0	8.012722646310433	16.0662844182027	TICAM1
Positive Regulation of Defense Response to Bacterium (GO:1900426)	1/7	0.134647	0.479625	0	0	8.012722646310433	16.0662844182027	KLK6
Steroid Hormone Receptor Signaling Pathway (GO:0043401)	1/7	0.134647	0.479625	0	0	8.012722646310433	16.0662844182027	CALCOCO1
Endothelial Cell Chemotaxis (GO:0035767)	1/7	0.134647	0.479625	0	0	8.012722646310433	16.0662844182027	PLEKHG5
Synaptic Vesicle Budding From Presynaptic Endocytic Zone Membrane (GO:0016185)	1/7	0.134647	0.479625	0	0	8.012722646310433	16.0662844182027	DNM1
Positive Regulation of Macrophage Cytokine Production (GO:0060907)	1/7	0.134647	0.479625	0	0	8.012722646310433	16.0662844182027	PLCG2
Fatty Acid Transmembrane Transport (GO:1902001)	1/7	0.134647	0.479625	0	0	8.012722646310433	16.0662844182027	SLC27A1
Positive Regulation of Mesenchymal Cell Proliferation (GO:0002053)	1/7	0.134647	0.479625	0	0	8.012722646310433	16.0662844182027	PDGFA
Positive Regulation of Platelet Aggregation (GO:1901731)	1/7	0.134647	0.479625	0	0	8.012722646310433	16.0662844182027	F11R
Granulocyte Differentiation (GO:0030851)	1/7	0.134647	0.479625	0	0	8.012722646310433	16.0662844182027	STAT5A
Positive Regulation of Ryanodine-Sensitive Calcium-Release Channel Activity (GO:0060316)	1/7	0.134647	0.479625	0	0	8.012722646310433	16.0662844182027	TRDN
Potassium Ion Export Across Plasma Membrane (GO:0097623)	1/7	0.134647	0.479625	0	0	8.012722646310433	16.0662844182027	KCNIP1
Lymphocyte Chemotaxis (GO:0048247)	1/7	0.134647	0.479625	0	0	8.012722646310433	16.0662844182027	GAS6
Macrophage Activation Involved in Immune Response (GO:0002281)	1/7	0.134647	0.479625	0	0	8.012722646310433	16.0662844182027	PLCG2
Maintenance of Gastrointestinal Epithelium (GO:0030277)	1/7	0.134647	0.479625	0	0	8.012722646310433	16.0662844182027	MUC4
Male Meiosis I (GO:0007141)	1/7	0.134647	0.479625	0	0	8.012722646310433	16.0662844182027	MEIOC
Methionine Metabolic Process (GO:0006555)	1/7	0.134647	0.479625	0	0	8.012722646310433	16.0662844182027	MAT1A
Purine Ribonucleoside Bisphosphate Metabolic Process (GO:0034035)	1/7	0.134647	0.479625	0	0	8.012722646310433	16.0662844182027	SULT1C4
Microtubule-Based Transport (GO:0099111)	1/7	0.134647	0.479625	0	0	8.012722646310433	16.0662844182027	DYNC1I1
Reelin-Mediated Signaling Pathway (GO:0038026)	1/7	0.134647	0.479625	0	0	8.012722646310433	16.0662844182027	STAT5A
Negative Regulation of Cell Adhesion Mediated by Integrin (GO:0033629)	1/7	0.134647	0.479625	0	0	8.012722646310433	16.0662844182027	MUC1
Regulation of MAPK Cascade (GO:0043408)	6/171	0.138416	0.479625	0	0	1.759745313052706	3.479885039931456	IL11;PLCG2;PDGFA;EPHB1;AGER;WNT4
Regulation of Cytokine Production Involved in Inflammatory Response (GO:1900015)	2/32	0.138648	0.479625	0	0	3.2112388250319284	6.344820294546316	TICAM1;ADCY7
Positive Regulation of Peptidyl-Tyrosine Phosphorylation (GO:0050731)	2/33	0.1457	0.479625	0	0	3.10740328760351	5.985499174832479	IL11;ARHGEF2
Microtubule Bundle Formation (GO:0001578)	2/33	0.1457	0.479625	0	0	3.10740328760351	5.985499174832479	TTLL6;GAS8
Intracellular Monoatomic Cation Homeostasis (GO:0030003)	5/136	0.146281	0.479625	0	0	1.8449316527605184	3.546373182190493	SLC24A1;ATP2B4;TNNI3;ATP1B2;TRDN
Potassium Ion Transport (GO:0006813)	3/65	0.147518	0.479625	0	0	2.333746898263027	4.466329225012397	SLC24A1;ABCC8;HPN
Positive Regulation of Intracellular Signal Transduction (GO:1902533)	13/460	0.149394	0.479625	0	0	1.4140044742729307	2.6882576037189794	IL11;GDF11;PLEKHG5;PDGFA;TICAM1;DDX60;AGER;MN1;P2RX2;PLCG2;TRIM38;GAS6;WNT4
Negative Regulation of Necroptotic Process (GO:0060546)	1/8	0.152347	0.479625	0	0	6.867502726281352	12.921840321066483	ARHGEF2
T Cell Activation Involved in Immune Response (GO:0002286)	1/8	0.152347	0.479625	0	0	6.867502726281352	12.921840321066483	ICAM1
Regulation of Long-Term Synaptic Depression (GO:1900452)	1/8	0.152347	0.479625	0	0	6.867502726281352	12.921840321066483	AGER
Negative Regulation of Programmed Necrotic Cell Death (GO:0062099)	1/8	0.152347	0.479625	0	0	6.867502726281352	12.921840321066483	ARHGEF2
Regulation of Muscle System Process (GO:0090257)	1/8	0.152347	0.479625	0	0	6.867502726281352	12.921840321066483	TNNI3
Regulation of Neuroinflammatory Response (GO:0150077)	1/8	0.152347	0.479625	0	0	6.867502726281352	12.921840321066483	PLCG2
Aromatic Amino Acid Family Catabolic Process (GO:0009074)	1/8	0.152347	0.479625	0	0	6.867502726281352	12.921840321066483	CARNS1
Nitric Oxide Mediated Signal Transduction (GO:0007263)	1/8	0.152347	0.479625	0	0	6.867502726281352	12.921840321066483	ATP2B4
Calcium-Dependent Activation of Synaptic Vesicle Fusion (GO:0099502)	1/8	0.152347	0.479625	0	0	6.867502726281352	12.921840321066483	SYT12
Cardiolipin Metabolic Process (GO:0032048)	1/8	0.152347	0.479625	0	0	6.867502726281352	12.921840321066483	PLA2G6
Cell Projection Assembly (GO:0030031)	1/8	0.152347	0.479625	0	0	6.867502726281352	12.921840321066483	PDGFA
Cellular Hyperosmotic Response (GO:0071474)	1/8	0.152347	0.479625	0	0	6.867502726281352	12.921840321066483	ARHGEF2
Cellular Response to Fatty Acid (GO:0071398)	1/8	0.152347	0.479625	0	0	6.867502726281352	12.921840321066483	PDK3
Regulation of Vascular Associated Smooth Muscle Cell Migration (GO:1904752)	1/8	0.152347	0.479625	0	0	6.867502726281352	12.921840321066483	IGFBP5
Cellular Response to Interleukin-4 (GO:0071353)	1/8	0.152347	0.479625	0	0	6.867502726281352	12.921840321066483	STAT5A
Regulation of Wound Healing, Spreading of Epidermal Cells (GO:1903689)	1/8	0.152347	0.479625	0	0	6.867502726281352	12.921840321066483	FIGNL2
Response to dsRNA (GO:0043331)	1/8	0.152347	0.479625	0	0	6.867502726281352	12.921840321066483	TICAM1
Cilium Movement Involved in Cell Motility (GO:0060294)	1/8	0.152347	0.479625	0	0	6.867502726281352	12.921840321066483	GAS8
Dendrite Self-Avoidance (GO:0070593)	1/8	0.152347	0.479625	0	0	6.867502726281352	12.921840321066483	ROBO3
Dendritic Cell Differentiation (GO:0097028)	1/8	0.152347	0.479625	0	0	6.867502726281352	12.921840321066483	GAS6
Detection of Mechanical Stimulus Involved in Sensory Perception of Sound (GO:0050910)	1/8	0.152347	0.479625	0	0	6.867502726281352	12.921840321066483	HPN
Sodium Ion Export Across Plasma Membrane (GO:0036376)	1/8	0.152347	0.479625	0	0	6.867502726281352	12.921840321066483	ATP1B2
Endothelium Development (GO:0003158)	1/8	0.152347	0.479625	0	0	6.867502726281352	12.921840321066483	FSTL1
T-Circle Formation (GO:0090656)	1/8	0.152347	0.479625	0	0	6.867502726281352	12.921840321066483	ERCC1
Telomere Maintenance via Telomere Trimming (GO:0090737)	1/8	0.152347	0.479625	0	0	6.867502726281352	12.921840321066483	ERCC1
Tertiary Alcohol Metabolic Process (GO:1902644)	1/8	0.152347	0.479625	0	0	6.867502726281352	12.921840321066483	SULT1C4
Toll-Like Receptor 3 Signaling Pathway (GO:0034138)	1/8	0.152347	0.479625	0	0	6.867502726281352	12.921840321066483	TICAM1
Establishment of Vesicle Localization (GO:0051650)	1/8	0.152347	0.479625	0	0	6.867502726281352	12.921840321066483	SYT12
Positive Regulation of Lipid Transport (GO:0032370)	1/8	0.152347	0.479625	0	0	6.867502726281352	12.921840321066483	ABCA3
Formation of Extrachromosomal Circular DNA (GO:0001325)	1/8	0.152347	0.479625	0	0	6.867502726281352	12.921840321066483	ERCC1
Positive Regulation of Monocyte Chemotaxis (GO:0090026)	1/8	0.152347	0.479625	0	0	6.867502726281352	12.921840321066483	CREB3L4
Innate Immune Response-Activating Signaling Pathway (GO:0002758)	1/8	0.152347	0.479625	0	0	6.867502726281352	12.921840321066483	HCK
Positive Regulation of Synaptic Vesicle Fusion to Presynaptic Active Zone Membrane (GO:0031632)	1/8	0.152347	0.479625	0	0	6.867502726281352	12.921840321066483	SYT12
Long-Chain Fatty Acid Import Into Cell (GO:0044539)	1/8	0.152347	0.479625	0	0	6.867502726281352	12.921840321066483	SLC27A1
Myelination in Peripheral Nervous System (GO:0022011)	1/8	0.152347	0.479625	0	0	6.867502726281352	12.921840321066483	LGI4
Myeloid Cell Activation Involved in Immune Response (GO:0002275)	1/8	0.152347	0.479625	0	0	6.867502726281352	12.921840321066483	PLCG2
Regulation of T-helper 17 Cell Lineage Commitment (GO:2000328)	1/8	0.152347	0.479625	0	0	6.867502726281352	12.921840321066483	STAT5A
Negative Regulation of T-helper 17 Cell Differentiation (GO:2000320)	1/8	0.152347	0.479625	0	0	6.867502726281352	12.921840321066483	STAT5A
Regulation of Chemokine (C-X-C Motif) Ligand 2 Production (GO:2000341)	1/8	0.152347	0.479625	0	0	6.867502726281352	12.921840321066483	OAS3
Negative Regulation of Chemokine Production (GO:0032682)	1/8	0.152347	0.479625	0	0	6.867502726281352	12.921840321066483	OAS3
Cellular Response to Lipopolysaccharide (GO:0071222)	3/66	0.152357	0.479625	0	0	2.2965201465201464	4.320968089174974	HCK;PLCG2;TICAM1
Lipid Transport (GO:0006869)	3/66	0.152357	0.479625	0	0	2.2965201465201464	4.320968089174974	SLC27A1;ABCA3;SLCO1A2
Regulation of Monoatomic Cation Transmembrane Transport (GO:1904062)	2/34	0.152824	0.479625	0	0	3.0100574712643677	5.654291561712503	KCNIP1;HRC
Regulation of Synaptic Transmission, Glutamatergic (GO:0051966)	2/34	0.152824	0.479625	0	0	3.0100574712643677	5.654291561712503	CACNG8;GRIK3
Positive Regulation of Kinase Activity (GO:0033674)	2/34	0.152824	0.479625	0	0	3.0100574712643677	5.654291561712503	AGAP2;GAS6
Cell-Matrix Adhesion (GO:0007160)	3/67	0.157245	0.479625	0	0	2.260456730769231	4.181725509129088	ACTN3;MADCAM1;NID2
Regulation of Programmed Cell Death (GO:0043067)	5/140	0.1592	0.479625	0	0	1.7896927935687625	3.2887334292058887	TOX3;ACTN3;CREB3L4;MAGED1;TNFRSF25
B Cell Differentiation (GO:0030183)	2/35	0.160015	0.479625	0	0	2.918611401370022	5.348314456033305	IL11;PLCG2
Regulation of Fibroblast Proliferation (GO:0048145)	2/35	0.160015	0.479625	0	0	2.918611401370022	5.348314456033305	PDGFA;GAS6
Regulation of Release of Sequestered Calcium Ion Into Cytosol (GO:0051279)	2/35	0.160015	0.479625	0	0	2.918611401370022	5.348314456033305	HRC;TRDN
Pattern Recognition Receptor Signaling Pathway (GO:0002221)	2/35	0.160015	0.479625	0	0	2.918611401370022	5.348314456033305	PLCG2;TICAM1
Regulation of Trans-Synaptic Signaling (GO:0099177)	2/35	0.160015	0.479625	0	0	2.918611401370022	5.348314456033305	GRIN3B;GRIK3
Renal System Development (GO:0072001)	2/35	0.160015	0.479625	0	0	2.918611401370022	5.348314456033305	GREB1L;WNT4
Positive Regulation of Interleukin-6 Production (GO:0032755)	2/35	0.160015	0.479625	0	0	2.918611401370022	5.348314456033305	PLCG2;ARHGEF2
Lysosome Organization (GO:0007040)	2/35	0.160015	0.479625	0	0	2.918611401370022	5.348314456033305	GAA;SPG11
Adenylate Cyclase-Activating G Protein-Coupled Receptor Signaling Pathway (GO:0007189)	3/69	0.167165	0.479625	0	0	2.1916083916083915	3.9202962875001086	ADGRG1;CALCRL;ADCY7
Response to Calcium Ion (GO:0051592)	3/69	0.167165	0.479625	0	0	2.1916083916083915	3.9202962875001086	PLCG2;DPEP1;RASGRP2
Negative Regulation of Cold-Induced Thermogenesis (GO:0120163)	2/36	0.167267	0.479625	0	0	2.8325445120576966	5.065051266434297	TLE3;ACTN3
Cell Chemotaxis (GO:0060326)	2/36	0.167267	0.479625	0	0	2.8325445120576966	5.065051266434297	PLEKHG5;EPHB1
Epidermis Development (GO:0008544)	2/36	0.167267	0.479625	0	0	2.8325445120576966	5.065051266434297	PLOD1;KLK6
Regulation of Cold-Induced Thermogenesis (GO:0120161)	4/105	0.167827	0.479625	0	0	1.9115409610459115	3.411765066615007	TLE3;ACTN3;ZNF516;YBX2
Metal Ion Transport (GO:0030001)	4/105	0.167827	0.479625	0	0	1.9115409610459115	3.411765066615007	SLC24A1;CACNG8;CALCRL;ATP2B4
3'-Phosphoadenosine 5'-Phosphosulfate Metabolic Process (GO:0050427)	1/9	0.169687	0.479625	0	0	6.008587786259542	10.658041841264335	SULT1C4
D-glucose Import (GO:0046323)	1/9	0.169687	0.479625	0	0	6.008587786259542	10.658041841264335	SLC27A1
Regulation of Interleukin-1 Production (GO:0032652)	1/9	0.169687	0.479625	0	0	6.008587786259542	10.658041841264335	GAS6
S-adenosylmethionine Metabolic Process (GO:0046500)	1/9	0.169687	0.479625	0	0	6.008587786259542	10.658041841264335	MAT1A
Regulation of Leukocyte Migration (GO:0002685)	1/9	0.169687	0.479625	0	0	6.008587786259542	10.658041841264335	MADCAM1
Negative Regulation of Transcription by Competitive Promoter Binding (GO:0010944)	1/9	0.169687	0.479625	0	0	6.008587786259542	10.658041841264335	MUC1
Negative Regulation of Type II Interferon Production (GO:0032689)	1/9	0.169687	0.479625	0	0	6.008587786259542	10.658041841264335	GAS6
Biogenic Amine Biosynthetic Process (GO:0042401)	1/9	0.169687	0.479625	0	0	6.008587786259542	10.658041841264335	PAH
cAMP Metabolic Process (GO:0046058)	1/9	0.169687	0.479625	0	0	6.008587786259542	10.658041841264335	ADCY7
cGMP-mediated Signaling (GO:0019934)	1/9	0.169687	0.479625	0	0	6.008587786259542	10.658041841264335	ATP2B4
Carboxylic Acid Biosynthetic Process (GO:0046394)	1/9	0.169687	0.479625	0	0	6.008587786259542	10.658041841264335	CARNS1
Regulation of Sequestering of Calcium Ion (GO:0051282)	1/9	0.169687	0.479625	0	0	6.008587786259542	10.658041841264335	TRDN
Positive Regulation by Symbiont of Entry Into Host (GO:0075294)	1/9	0.169687	0.479625	0	0	6.008587786259542	10.658041841264335	TRIM38
Positive Regulation of Brown Fat Cell Differentiation (GO:0090336)	1/9	0.169687	0.479625	0	0	6.008587786259542	10.658041841264335	FNDC5
Skeletal Muscle Contraction (GO:0003009)	1/9	0.169687	0.479625	0	0	6.008587786259542	10.658041841264335	TNNI3
Positive Regulation of Fatty Acid Biosynthetic Process (GO:0045723)	1/9	0.169687	0.479625	0	0	6.008587786259542	10.658041841264335	MLXIPL
Endothelial Cell Differentiation (GO:0045446)	1/9	0.169687	0.479625	0	0	6.008587786259542	10.658041841264335	FSTL1
Epithelial Structure Maintenance (GO:0010669)	1/9	0.169687	0.479625	0	0	6.008587786259542	10.658041841264335	MUC4
Fatty Acid Homeostasis (GO:0055089)	1/9	0.169687	0.479625	0	0	6.008587786259542	10.658041841264335	MLXIPL
Homologous Chromosome Segregation (GO:0045143)	1/9	0.169687	0.479625	0	0	6.008587786259542	10.658041841264335	MEIOB
Positive Regulation of Sodium Ion Transmembrane Transport (GO:1902307)	1/9	0.169687	0.479625	0	0	6.008587786259542	10.658041841264335	ATP1B2
Positive Regulation of Viral Entry Into Host Cell (GO:0046598)	1/9	0.169687	0.479625	0	0	6.008587786259542	10.658041841264335	TRIM38
Lipid Import Into Cell (GO:0140354)	1/9	0.169687	0.479625	0	0	6.008587786259542	10.658041841264335	SLC27A1
Megakaryocyte Differentiation (GO:0030219)	1/9	0.169687	0.479625	0	0	6.008587786259542	10.658041841264335	IL11
Proteinogenic Amino Acid Catabolic Process (GO:0170040)	1/9	0.169687	0.479625	0	0	6.008587786259542	10.658041841264335	CARNS1
Proteinogenic Amino Acid Metabolic Process (GO:0170039)	1/9	0.169687	0.479625	0	0	6.008587786259542	10.658041841264335	NAT8L
Modulation by Symbiont of Entry Into Host (GO:0052372)	1/9	0.169687	0.479625	0	0	6.008587786259542	10.658041841264335	TRIM38
Multicellular Organismal-Level Iron Ion Homeostasis (GO:0060586)	1/9	0.169687	0.479625	0	0	6.008587786259542	10.658041841264335	HEPH
Regulation of Amyloid Precursor Protein Biosynthetic Process (GO:0042984)	1/9	0.169687	0.479625	0	0	6.008587786259542	10.658041841264335	NECAB2
Regulation of Axon Regeneration (GO:0048679)	1/9	0.169687	0.479625	0	0	6.008587786259542	10.658041841264335	FIGNL2
- Reg of Adenylate Cyclase-Activating GPCR Sgnlng Pway (GO:0106072)	1/9	0.169687	0.479625	0	0	6.008587786259542	10.658041841264335	ATP2B4
Negative Regulation of calcineurin-NFAT Signaling Cascade (GO:0070885)	1/9	0.169687	0.479625	0	0	6.008587786259542	10.658041841264335	ATP2B4
Negative Regulation of Calcineurin-Mediated Signaling (GO:0106057)	1/9	0.169687	0.479625	0	0	6.008587786259542	10.658041841264335	ATP2B4
Negative Regulation of Cardiac Muscle Hypertrophy (GO:0010614)	1/9	0.169687	0.479625	0	0	6.008587786259542	10.658041841264335	ATP2B4
Negative Regulation of Cell Activation (GO:0050866)	1/9	0.169687	0.479625	0	0	6.008587786259542	10.658041841264335	PDGFA
Negative Regulation of Cellular Response to Vascular Endothelial Growth Factor Stimulus (GO:1902548)	1/9	0.169687	0.479625	0	0	6.008587786259542	10.658041841264335	ATP2B4
Negative Regulation of Cytokine Production (GO:0001818)	4/106	0.171813	0.480561	0	0	1.892648951472481	3.333618489943566	SYT12;GAS6;AGER;ADCY7
Nicotinamide Nucleotide Metabolic Process (GO:0046496)	2/37	0.174574	0.480561	0	0	2.7513957307060757	4.802296523978724	FMO4;ENO3
Positive Regulation of Phosphorylation (GO:0042327)	3/71	0.177262	0.480561	0	0	2.126809954751131	3.6796529049679174	CLIP3;FAXDC2;GAS6
Regulation of Macromolecule Biosynthetic Process (GO:0010556)	4/108	0.179883	0.480561	0	0	1.855954855954856	3.1837999210955426	KDM4D;PDGFA;YBX2;TRIM38
Cell-Cell Adhesion via Plasma-Membrane Adhesion Molecules (GO:0098742)	4/108	0.179883	0.480561	0	0	1.855954855954856	3.1837999210955426	SDK1;ROBO3;SDK2;ICAM1
SCF-dependent Proteasomal Ubiquitin-Dependent Protein Catabolic Process (GO:0031146)	2/38	0.181932	0.480561	0	0	2.6747552149851	4.558110195291826	FBXL20;NCCRP1
Glucose Metabolic Process (GO:0006006)	2/38	0.181932	0.480561	0	0	2.6747552149851	4.558110195291826	GAA;ENO3
Receptor Internalization (GO:0031623)	2/38	0.181932	0.480561	0	0	2.6747552149851	4.558110195291826	CALCRL;DNM1
G Protein-Coupled Glutamate Receptor Signaling Pathway (GO:0007216)	1/10	0.186673	0.480561	0	0	5.340542832909245	8.96355865127581	GRIK3
Negative Regulation of Interleukin-1 Beta Production (GO:0032691)	1/10	0.186673	0.480561	0	0	5.340542832909245	8.96355865127581	SERPINB1
- Reg of Intrinsic Apoptotic Sgnlng Pway in Resp to DNA Damage by P53 Cls Mediator (GO:1902166)	1/10	0.186673	0.480561	0	0	5.340542832909245	8.96355865127581	MUC1
Negative Regulation of Macrophage Activation (GO:0043031)	1/10	0.186673	0.480561	0	0	5.340542832909245	8.96355865127581	SYT12
Negative Regulation of Microtubule Polymerization (GO:0031115)	1/10	0.186673	0.480561	0	0	5.340542832909245	8.96355865127581	CLIP3
Regulation of Insulin-Like Growth Factor Receptor Signaling Pathway (GO:0043567)	1/10	0.186673	0.480561	0	0	5.340542832909245	8.96355865127581	IGFBP5
UV-damage Excision Repair (GO:0070914)	1/10	0.186673	0.480561	0	0	5.340542832909245	8.96355865127581	ERCC1
acetyl-CoA Biosynthetic Process (GO:0006085)	1/10	0.186673	0.480561	0	0	5.340542832909245	8.96355865127581	LDHD
Regulation of Mesenchymal Cell Proliferation (GO:0010464)	1/10	0.186673	0.480561	0	0	5.340542832909245	8.96355865127581	PDGFA
Regulation of Multicellular Organism Growth (GO:0040014)	1/10	0.186673	0.480561	0	0	5.340542832909245	8.96355865127581	STAT5A
Aspartate Family Amino Acid Metabolic Process (GO:0009066)	1/10	0.186673	0.480561	0	0	5.340542832909245	8.96355865127581	NAT8L
Canonical Glycolysis (GO:0061621)	1/10	0.186673	0.480561	0	0	5.340542832909245	8.96355865127581	ENO3
Oxoacid Metabolic Process (GO:0043436)	1/10	0.186673	0.480561	0	0	5.340542832909245	8.96355865127581	SULT1C4
Cardiac Myofibril Assembly (GO:0055003)	1/10	0.186673	0.480561	0	0	5.340542832909245	8.96355865127581	NEBL
Cellular Response to Estrogen Stimulus (GO:0071391)	1/10	0.186673	0.480561	0	0	5.340542832909245	8.96355865127581	BCAS3
Podocyte Differentiation (GO:0072112)	1/10	0.186673	0.480561	0	0	5.340542832909245	8.96355865127581	NPHS1
Regulation of Voltage-Gated Calcium Channel Activity (GO:1901385)	1/10	0.186673	0.480561	0	0	5.340542832909245	8.96355865127581	CACNA1F
Removal of Superoxide Radicals (GO:0019430)	1/10	0.186673	0.480561	0	0	5.340542832909245	8.96355865127581	MB
Cellular Response to Superoxide (GO:0071451)	1/10	0.186673	0.480561	0	0	5.340542832909245	8.96355865127581	MB
Central Nervous System Projection Neuron Axonogenesis (GO:0021952)	1/10	0.186673	0.480561	0	0	5.340542832909245	8.96355865127581	EPHB1
Response to Interferon-Alpha (GO:0035455)	1/10	0.186673	0.480561	0	0	5.340542832909245	8.96355865127581	GAS6
Cyclic Nucleotide Biosynthetic Process (GO:0009190)	1/10	0.186673	0.480561	0	0	5.340542832909245	8.96355865127581	ADCY7
Endoplasmic Reticulum Membrane Organization (GO:0090158)	1/10	0.186673	0.480561	0	0	5.340542832909245	8.96355865127581	TRDN
Positive Regulation of Heart Rate (GO:0010460)	1/10	0.186673	0.480561	0	0	5.340542832909245	8.96355865127581	HRC
Epigenetic Programming of Gene Expression (GO:0043045)	1/10	0.186673	0.480561	0	0	5.340542832909245	8.96355865127581	CTCFL
+ Reg of Insulin Secretion Inv in Cellular Resp to Glucose Stimulus (GO:0035774)	1/10	0.186673	0.480561	0	0	5.340542832909245	8.96355865127581	PLA2G6
Glucose Catabolic Process to Pyruvate (GO:0061718)	1/10	0.186673	0.480561	0	0	5.340542832909245	8.96355865127581	ENO3
Glycoside Metabolic Process (GO:0016137)	1/10	0.186673	0.480561	0	0	5.340542832909245	8.96355865127581	SULT1C4
Growth Hormone Receptor Signaling Pathway via JAK-STAT (GO:0060397)	1/10	0.186673	0.480561	0	0	5.340542832909245	8.96355865127581	STAT5A
Positive Regulation of Smooth Muscle Cell Migration (GO:0014911)	1/10	0.186673	0.480561	0	0	5.340542832909245	8.96355865127581	IGFBP5
Positive Regulation of Striated Muscle Cell Differentiation (GO:0051155)	1/10	0.186673	0.480561	0	0	5.340542832909245	8.96355865127581	ATP11A
Positive Regulation of Transmembrane Transport (GO:0034764)	1/10	0.186673	0.480561	0	0	5.340542832909245	8.96355865127581	CLIP3
Positive Regulation of Triglyceride Biosynthetic Process (GO:0010867)	1/10	0.186673	0.480561	0	0	5.340542832909245	8.96355865127581	SLC27A1
Intracellular Potassium Ion Homeostasis (GO:0030007)	1/10	0.186673	0.480561	0	0	5.340542832909245	8.96355865127581	ATP1B2
Intraciliary Retrograde Transport (GO:0035721)	1/10	0.186673	0.480561	0	0	5.340542832909245	8.96355865127581	IFT140
Ionotropic Glutamate Receptor Signaling Pathway (GO:0035235)	1/10	0.186673	0.480561	0	0	5.340542832909245	8.96355865127581	GRIN3B
Male Gamete Generation (GO:0048232)	1/10	0.186673	0.480561	0	0	5.340542832909245	8.96355865127581	MEIOB
Mitotic DNA Replication (GO:1902969)	1/10	0.186673	0.480561	0	0	5.340542832909245	8.96355865127581	RECQL5
Regulation of RNA Metabolic Process (GO:0051252)	1/10	0.186673	0.480561	0	0	5.340542832909245	8.96355865127581	OAS3
Regulation of Ceramide Biosynthetic Process (GO:2000303)	1/10	0.186673	0.480561	0	0	5.340542832909245	8.96355865127581	PLA2G6
External Encapsulating Structure Organization (GO:0045229)	3/73	0.187523	0.481853	0	0	2.065714285714286	3.457707858971319	COL1A2;COL22A1;COL8A2
Positive Regulation of Protein Modification Process (GO:0031401)	3/74	0.19271	0.488021	0	0	2.0364572047670637	3.353166017918301	CLIP3;FAXDC2;GAS6
Response to Peptide Hormone (GO:0043434)	2/40	0.196777	0.488021	0	0	2.5335753176043556	4.1187883294759535	STAT5A;IGFBP5
Skin Development (GO:0043588)	2/40	0.196777	0.488021	0	0	2.5335753176043556	4.1187883294759535	COL1A2;PDGFA
Ephrin Receptor Signaling Pathway (GO:0048013)	2/40	0.196777	0.488021	0	0	2.5335753176043556	4.1187883294759535	EPHB1;NGEF
Glycerophospholipid Metabolic Process (GO:0006650)	2/40	0.196777	0.488021	0	0	2.5335753176043556	4.1187883294759535	PLCG2;PLA2G6
Monocarboxylic Acid Transport (GO:0015718)	2/40	0.196777	0.488021	0	0	2.5335753176043556	4.1187883294759535	SLC27A1;SLCO1A2
Extracellular Structure Organization (GO:0043062)	3/75	0.197933	0.488021	0	0	2.0080128205128207	3.25262997075914	COL1A2;COL22A1;COL8A2
Neuron Differentiation (GO:0030182)	4/113	0.200588	0.488021	0	0	1.7701108710283022	2.8436911367213114	EMX1;ATP2B4;LHX5;WNT4
Reg of Intrinsic Apoptotic Sgnlng Pway in Resp to DNA Damage by P53 Cls Mediator (GO:1902165)	1/11	0.203313	0.488021	0	0	4.806106870229008	7.6561810091329185	MUC1
Regulation of Macrophage Cytokine Production (GO:0010935)	1/11	0.203313	0.488021	0	0	4.806106870229008	7.6561810091329185	PLCG2
Acylglycerol Homeostasis (GO:0055090)	1/11	0.203313	0.488021	0	0	4.806106870229008	7.6561810091329185	MLXIPL
Bile Acid and Bile Salt Transport (GO:0015721)	1/11	0.203313	0.488021	0	0	4.806106870229008	7.6561810091329185	SLCO1A2
Calcium-Ion Regulated Exocytosis (GO:0017156)	1/11	0.203313	0.488021	0	0	4.806106870229008	7.6561810091329185	SYT12
Regulation of Smooth Muscle Cell Differentiation (GO:0051150)	1/11	0.203313	0.488021	0	0	4.806106870229008	7.6561810091329185	OLFM2
Cell Communication by Electrical Coupling Involved in Cardiac Conduction (GO:0086064)	1/11	0.203313	0.488021	0	0	4.806106870229008	7.6561810091329185	ATP1B2
Regulation of Transferase Activity (GO:0051338)	1/11	0.203313	0.488021	0	0	4.806106870229008	7.6561810091329185	ZNF83
Response to Fatty Acid (GO:0070542)	1/11	0.203313	0.488021	0	0	4.806106870229008	7.6561810091329185	PDK3
Dendritic Spine Morphogenesis (GO:0060997)	1/11	0.203313	0.488021	0	0	4.806106870229008	7.6561810091329185	EPHB1
Endocrine System Development (GO:0035270)	1/11	0.203313	0.488021	0	0	4.806106870229008	7.6561810091329185	WNT4
Positive Regulation of Immune Effector Process (GO:0002699)	1/11	0.203313	0.488021	0	0	4.806106870229008	7.6561810091329185	DDX60
Positive Regulation of Integrin-Mediated Signaling Pathway (GO:2001046)	1/11	0.203313	0.488021	0	0	4.806106870229008	7.6561810091329185	NID1
Establishment of Protein Localization to Chromosome (GO:0070199)	1/11	0.203313	0.488021	0	0	4.806106870229008	7.6561810091329185	CTCFL
Thioester Metabolic Process (GO:0035383)	1/11	0.203313	0.488021	0	0	4.806106870229008	7.6561810091329185	ACSF2
Ether Lipid Metabolic Process (GO:0046485)	1/11	0.203313	0.488021	0	0	4.806106870229008	7.6561810091329185	PLA2G6
Glycolytic Process Through Glucose-6-Phosphate (GO:0061620)	1/11	0.203313	0.488021	0	0	4.806106870229008	7.6561810091329185	ENO3
Positive Regulation of Positive Chemotaxis (GO:0050927)	1/11	0.203313	0.488021	0	0	4.806106870229008	7.6561810091329185	CREB3L4
Positive Regulation of Protein Export From Nucleus (GO:0046827)	1/11	0.203313	0.488021	0	0	4.806106870229008	7.6561810091329185	GAS6
Positive Regulation of Response to Cytokine Stimulus (GO:0060760)	1/11	0.203313	0.488021	0	0	4.806106870229008	7.6561810091329185	GAS6
Intracellular Sodium Ion Homeostasis (GO:0006883)	1/11	0.203313	0.488021	0	0	4.806106870229008	7.6561810091329185	ATP1B2
Leukotriene Metabolic Process (GO:0006691)	1/11	0.203313	0.488021	0	0	4.806106870229008	7.6561810091329185	PTGR1
Protein Hydroxylation (GO:0018126)	1/11	0.203313	0.488021	0	0	4.806106870229008	7.6561810091329185	PLOD1
Mammary Gland Epithelium Development (GO:0061180)	1/11	0.203313	0.488021	0	0	4.806106870229008	7.6561810091329185	WNT4
Meiotic Sister Chromatid Cohesion (GO:0051177)	1/11	0.203313	0.488021	0	0	4.806106870229008	7.6561810091329185	STAG3
Mesenchyme Development (GO:0060485)	1/11	0.203313	0.488021	0	0	4.806106870229008	7.6561810091329185	CRELD1
Mitotic intra-S DNA Damage Checkpoint Signaling (GO:0031573)	1/11	0.203313	0.488021	0	0	4.806106870229008	7.6561810091329185	EME1
Regulation of D-glucose Transmembrane Transport (GO:0010827)	1/11	0.203313	0.488021	0	0	4.806106870229008	7.6561810091329185	CLIP3
Negative Regulation of ATP-dependent Activity (GO:0032780)	1/11	0.203313	0.488021	0	0	4.806106870229008	7.6561810091329185	TNNI3
Negative Regulation of Biomineral Tissue Development (GO:0070168)	1/11	0.203313	0.488021	0	0	4.806106870229008	7.6561810091329185	GAS6
Antiviral Innate Immune Response (GO:0140374)	2/41	0.204256	0.488591	0	0	2.4684153649670892	3.920788387373802	OAS3;ZDHHC11
Response to Light Stimulus (GO:0009416)	2/41	0.204256	0.488591	0	0	2.4684153649670892	3.920788387373802	MAPK10;SLC24A1
Negative Regulation of Cell Motility (GO:2000146)	4/114	0.204813	0.489078	0	0	1.753878553878554	2.7810544205623953	SERPINB1;IGFBP5;DPEP1;FIGNL2
Phosphatidylinositol Biosynthetic Process (GO:0006661)	3/77	0.20848	0.492175	0	0	1.9534303534303534	3.0628072161206057	PITPNM3;PLCG2;OCRL
Plasma Membrane Bounded Cell Projection Organization (GO:0120036)	4/115	0.209064	0.492175	0	0	1.737938710911684	2.7200752715413006	TNXB;ATP1B2;AGER;TTC17
Negative Regulation of Protein Catabolic Process (GO:0042177)	2/42	0.211765	0.492175	0	0	2.406513409961686	3.7355789996663686	PRKCG;AGAP2
Regulation of Mitotic Nuclear Division (GO:0007088)	2/42	0.211765	0.492175	0	0	2.406513409961686	3.7355789996663686	CUL9;L3MBTL1
Kidney Development (GO:0001822)	2/42	0.211765	0.492175	0	0	2.406513409961686	3.7355789996663686	GREB1L;WNT4
Protein Homotetramerization (GO:0051289)	2/42	0.211765	0.492175	0	0	2.406513409961686	3.7355789996663686	MAT1A;DNM1
Myelination (GO:0042552)	2/42	0.211765	0.492175	0	0	2.406513409961686	3.7355789996663686	LGI4;KLK6
Lipid Metabolic Process (GO:0006629)	5/157	0.218721	0.492175	0	0	1.5873623011015912	2.4127270813352375	MLXIPL;ACBD4;OCRL;ACADSB;ACSF2
Regulation of Hydrolase Activity (GO:0051336)	2/43	0.219301	0.492175	0	0	2.3476310625175216	3.562086985004223	OAS3;NGEF
Regulation of Blood Vessel Endothelial Cell Migration (GO:0043535)	2/43	0.219301	0.492175	0	0	2.3476310625175216	3.562086985004223	STAT5A;ATP2B4
Negative Regulation of Endopeptidase Activity (GO:0010951)	1/12	0.219613	0.492175	0	0	4.3688410825815405	6.622672094575555	SERPINB1
- Reg of Endoplasmic Reticulum Stress-Induced Intrinsic Apoptotic Sgnlng Pway (GO:1902236)	1/12	0.219613	0.492175	0	0	4.3688410825815405	6.622672094575555	CREB3L4
Regulation of Establishment of Endothelial Barrier (GO:1903140)	1/12	0.219613	0.492175	0	0	4.3688410825815405	6.622672094575555	F11R
Negative Regulation of Intrinsic Apoptotic Signaling Pathway by P53 Class Mediator (GO:1902254)	1/12	0.219613	0.492175	0	0	4.3688410825815405	6.622672094575555	MUC1
Regulation of Heterotypic Cell-Cell Adhesion (GO:0034114)	1/12	0.219613	0.492175	0	0	4.3688410825815405	6.622672094575555	AGER
Negative Regulation of Peptidase Activity (GO:0010466)	1/12	0.219613	0.492175	0	0	4.3688410825815405	6.622672094575555	SERPINB1
Negative Regulation of Phagocytosis (GO:0050765)	1/12	0.219613	0.492175	0	0	4.3688410825815405	6.622672094575555	SYT12
Adipose Tissue Development (GO:0060612)	1/12	0.219613	0.492175	0	0	4.3688410825815405	6.622672094575555	ZNF516
Negative Regulation of Signal Transduction by P53 Class Mediator (GO:1901797)	1/12	0.219613	0.492175	0	0	4.3688410825815405	6.622672094575555	MLXIPL
Regulation of Monocyte Chemotaxis (GO:0090025)	1/12	0.219613	0.492175	0	0	4.3688410825815405	6.622672094575555	CREB3L4
Regulation of Osteoblast Proliferation (GO:0033688)	1/12	0.219613	0.492175	0	0	4.3688410825815405	6.622672094575555	MN1
Regulation of Protein Autophosphorylation (GO:0031952)	1/12	0.219613	0.492175	0	0	4.3688410825815405	6.622672094575555	PDGFA
Non-Proteinogenic Amino Acid Metabolic Process (GO:0170041)	1/12	0.219613	0.492175	0	0	4.3688410825815405	6.622672094575555	DPEP1
Cell Projection Organization (GO:0030030)	1/12	0.219613	0.492175	0	0	4.3688410825815405	6.622672094575555	PDGFA
Cellular Response to Lectin (GO:1990858)	1/12	0.219613	0.492175	0	0	4.3688410825815405	6.622672094575555	PLCG2
Response to Axon Injury (GO:0048678)	1/12	0.219613	0.492175	0	0	4.3688410825815405	6.622672094575555	PLCG2
Defense Response to Fungus (GO:0050832)	1/12	0.219613	0.492175	0	0	4.3688410825815405	6.622672094575555	PLCG2
Signaling Receptor Ligand Precursor Processing (GO:0140448)	1/12	0.219613	0.492175	0	0	4.3688410825815405	6.622672094575555	SCG5
Detection of Mechanical Stimulus Involved in Sensory Perception (GO:0050974)	1/12	0.219613	0.492175	0	0	4.3688410825815405	6.622672094575555	HPN
Steroid Biosynthetic Process (GO:0006694)	1/12	0.219613	0.492175	0	0	4.3688410825815405	6.622672094575555	FAXDC2
Stimulatory C-type Lectin Receptor Signaling Pathway (GO:0002223)	1/12	0.219613	0.492175	0	0	4.3688410825815405	6.622672094575555	PLCG2
Sulfur Amino Acid Metabolic Process (GO:0000096)	1/12	0.219613	0.492175	0	0	4.3688410825815405	6.622672094575555	DPEP1
Positive Regulation of Homotypic Cell-Cell Adhesion (GO:0034112)	1/12	0.219613	0.492175	0	0	4.3688410825815405	6.622672094575555	F11R
Eye Photoreceptor Cell Differentiation (GO:0001754)	1/12	0.219613	0.492175	0	0	4.3688410825815405	6.622672094575555	SDK2
Positive Regulation of Vascular Permeability (GO:0043117)	1/12	0.219613	0.492175	0	0	4.3688410825815405	6.622672094575555	TJP3
Modified Amino Acid Catabolic Process (GO:0042219)	1/12	0.219613	0.492175	0	0	4.3688410825815405	6.622672094575555	DPEP1
Regulation of Brown Fat Cell Differentiation (GO:0090335)	1/12	0.219613	0.492175	0	0	4.3688410825815405	6.622672094575555	FNDC5
Regulation of Carbohydrate Metabolic Process (GO:0006109)	1/12	0.219613	0.492175	0	0	4.3688410825815405	6.622672094575555	PDK3
Negative Regulation of Metabolic Process (GO:0009892)	2/44	0.226859	0.495867	0	0	2.2915526363802226	3.399350715765696	TLE3;ACTN3
Rho Protein Signal Transduction (GO:0007266)	2/44	0.226859	0.495867	0	0	2.2915526363802226	3.399350715765696	COL1A2;PLEKHG5
Phospholipase C-activating G Protein-Coupled Receptor Signaling Pathway (GO:0007200)	2/44	0.226859	0.495867	0	0	2.2915526363802226	3.399350715765696	PRKCG;ADGRG1
Negative Regulation of Cytokine-Mediated Signaling Pathway (GO:0001960)	2/45	0.234435	0.495867	0	0	2.2380825091330303	3.246506316532399	OAS3;GAS6
Phagocytosis (GO:0006909)	2/45	0.234435	0.495867	0	0	2.2380825091330303	3.246506316532399	GAS6;AGER
Endoplasmic Reticulum Unfolded Protein Response (GO:0030968)	2/45	0.234435	0.495867	0	0	2.2380825091330303	3.246506316532399	ERN2;CREB3L4
2-Oxoglutarate Metabolic Process (GO:0006103)	1/13	0.235582	0.495867	0	0	4.004452926208652	5.789230406964141	LDHD
Regulation of Endopeptidase Activity (GO:0052548)	1/13	0.235582	0.495867	0	0	4.004452926208652	5.789230406964141	SERPINB1
L-amino Acid Metabolic Process (GO:0170033)	1/13	0.235582	0.495867	0	0	4.004452926208652	5.789230406964141	NAT8L
Regulation of Inflammatory Response to Antigenic Stimulus (GO:0002861)	1/13	0.235582	0.495867	0	0	4.004452926208652	5.789230406964141	HCK
Negative Regulation of Receptor Internalization (GO:0002091)	1/13	0.235582	0.495867	0	0	4.004452926208652	5.789230406964141	NECAB2
Negative Regulation of Smooth Muscle Cell Migration (GO:0014912)	1/13	0.235582	0.495867	0	0	4.004452926208652	5.789230406964141	IGFBP5
Antibacterial Humoral Response (GO:0019731)	1/13	0.235582	0.495867	0	0	4.004452926208652	5.789230406964141	PLA2G6
Negative Regulation of Tumor Necrosis Factor-Mediated Signaling Pathway (GO:0010804)	1/13	0.235582	0.495867	0	0	4.004452926208652	5.789230406964141	GAS6
Apoptotic Nuclear Changes (GO:0030262)	1/13	0.235582	0.495867	0	0	4.004452926208652	5.789230406964141	ERN2
peptidyl-L-cysteine S-palmitoylation (GO:0018230)	1/13	0.235582	0.495867	0	0	4.004452926208652	5.789230406964141	ZDHHC11
peptidyl-S-diacylglycerol-L-cysteine Biosynthetic Process From Peptidyl-Cysteine (GO:0018231)	1/13	0.235582	0.495867	0	0	4.004452926208652	5.789230406964141	ZDHHC11
Peptidyl-Glutamic Acid Modification (GO:0018200)	1/13	0.235582	0.495867	0	0	4.004452926208652	5.789230406964141	TTLL6
Regulation of Viral Life Cycle (GO:1903900)	1/13	0.235582	0.495867	0	0	4.004452926208652	5.789230406964141	TRIM38
Cellular Response to Low-Density Lipoprotein Particle Stimulus (GO:0071404)	1/13	0.235582	0.495867	0	0	4.004452926208652	5.789230406964141	TICAM1
Polyol Metabolic Process (GO:0019751)	1/13	0.235582	0.495867	0	0	4.004452926208652	5.789230406964141	OCRL
Cilium-Dependent Cell Motility (GO:0060285)	1/13	0.235582	0.495867	0	0	4.004452926208652	5.789230406964141	GAS8
Clathrin Coat Assembly (GO:0048268)	1/13	0.235582	0.495867	0	0	4.004452926208652	5.789230406964141	DNM1
Positive Regulation of Amyloid-Beta Formation (GO:1902004)	1/13	0.235582	0.495867	0	0	4.004452926208652	5.789230406964141	GSAP
Sodium Ion Homeostasis (GO:0055078)	1/13	0.235582	0.495867	0	0	4.004452926208652	5.789230406964141	ATP1B2
Positive Regulation of Collagen Biosynthetic Process (GO:0032967)	1/13	0.235582	0.495867	0	0	4.004452926208652	5.789230406964141	WNT4
Positive Regulation of Collagen Metabolic Process (GO:0010714)	1/13	0.235582	0.495867	0	0	4.004452926208652	5.789230406964141	WNT4
Positive Regulation of Embryonic Development (GO:0040019)	1/13	0.235582	0.495867	0	0	4.004452926208652	5.789230406964141	WNT4
Endocardial Cushion Development (GO:0003197)	1/13	0.235582	0.495867	0	0	4.004452926208652	5.789230406964141	CRELD1
Endolysosomal Toll-Like Receptor Signaling Pathway (GO:0140894)	1/13	0.235582	0.495867	0	0	4.004452926208652	5.789230406964141	TICAM1
Positive Regulation of Glycolytic Process (GO:0045821)	1/13	0.235582	0.495867	0	0	4.004452926208652	5.789230406964141	MLXIPL
Ventricular Cardiac Muscle Tissue Development (GO:0003229)	1/13	0.235582	0.495867	0	0	4.004452926208652	5.789230406964141	TNNI3
Positive Regulation of Purine Nucleotide Catabolic Process (GO:0033123)	1/13	0.235582	0.495867	0	0	4.004452926208652	5.789230406964141	MLXIPL
Innate Immune Response Activating Cell Surface Receptor Signaling Pathway (GO:0002220)	1/13	0.235582	0.495867	0	0	4.004452926208652	5.789230406964141	PLCG2
Protein Autoprocessing (GO:0016540)	1/13	0.235582	0.495867	0	0	4.004452926208652	5.789230406964141	KLK6
Regulation of AMPA Receptor Activity (GO:2000311)	1/13	0.235582	0.495867	0	0	4.004452926208652	5.789230406964141	CACNG8
Mitotic G1 DNA Damage Checkpoint Signaling (GO:0031571)	1/13	0.235582	0.495867	0	0	4.004452926208652	5.789230406964141	MUC1
Regulation of Aerobic Respiration (GO:1903715)	1/13	0.235582	0.495867	0	0	4.004452926208652	5.789230406964141	ACTN3
Regulation of Bicellular Tight Junction Assembly (GO:2000810)	1/13	0.235582	0.495867	0	0	4.004452926208652	5.789230406964141	F11R
Regulation of Cellular Response to Transforming Growth Factor Beta Stimulus (GO:1903844)	1/13	0.235582	0.495867	0	0	4.004452926208652	5.789230406964141	LTBP4
Calcium-Mediated Signaling (GO:0019722)	2/46	0.242026	0.505735	0	0	2.187042842215256	3.1027758352290977	PLCG2;TNNI3
Visual Perception (GO:0007601)	2/46	0.242026	0.505735	0	0	2.187042842215256	3.1027758352290977	SLC24A1;CACNA1F
Positive Regulation of Protein Localization to Plasma Membrane (GO:1903078)	2/46	0.242026	0.505735	0	0	2.187042842215256	3.1027758352290977	CLIP3;ATP2B4
Positive Regulation of DNA-binding Transcription Factor Activity (GO:0051091)	4/124	0.248357	0.505735	0	0	1.6064350064350064	2.2375871061221657	PLCG2;ARHGEF2;TRIM38;AGER
DNA Catabolic Process (GO:0006308)	1/14	0.251224	0.505735	0	0	3.696124486200822	5.105858961960445	DNASE1L1
Negative Regulation of Inflammatory Response to Antigenic Stimulus (GO:0002862)	1/14	0.251224	0.505735	0	0	3.696124486200822	5.105858961960445	HCK
Negative Regulation of Platelet Activation (GO:0010544)	1/14	0.251224	0.505735	0	0	3.696124486200822	5.105858961960445	PDGFA
Negative Regulation of Transcription Elongation by RNA Polymerase II (GO:0034244)	1/14	0.251224	0.505735	0	0	3.696124486200822	5.105858961960445	RECQL5
Regulation of Plasminogen Activation (GO:0010755)	1/14	0.251224	0.505735	0	0	3.696124486200822	5.105858961960445	HPN
Regulation of Ryanodine-Sensitive Calcium-Release Channel Activity (GO:0060314)	1/14	0.251224	0.505735	0	0	3.696124486200822	5.105858961960445	TRDN
Regulation of Triglyceride Biosynthetic Process (GO:0010866)	1/14	0.251224	0.505735	0	0	3.696124486200822	5.105858961960445	SLC27A1
Regulation of Viral Entry Into Host Cell (GO:0046596)	1/14	0.251224	0.505735	0	0	3.696124486200822	5.105858961960445	TRIM38
Positive Regulation by Host of Viral Transcription (GO:0043923)	1/14	0.251224	0.505735	0	0	3.696124486200822	5.105858961960445	HPN
Chemokine-Mediated Signaling Pathway (GO:0070098)	1/14	0.251224	0.505735	0	0	3.696124486200822	5.105858961960445	STAT5A
Positive Regulation of Fatty Acid Metabolic Process (GO:0045923)	1/14	0.251224	0.505735	0	0	3.696124486200822	5.105858961960445	MLXIPL
Positive Regulation of Interleukin-12 Production (GO:0032735)	1/14	0.251224	0.505735	0	0	3.696124486200822	5.105858961960445	PLCG2
Glycogen Catabolic Process (GO:0005980)	1/14	0.251224	0.505735	0	0	3.696124486200822	5.105858961960445	GAA
Growth Hormone Receptor Signaling Pathway (GO:0060396)	1/14	0.251224	0.505735	0	0	3.696124486200822	5.105858961960445	STAT5A
Positive Regulation of Protein Processing (GO:0010954)	1/14	0.251224	0.505735	0	0	3.696124486200822	5.105858961960445	HPN
Import Into Cell (GO:0098657)	1/14	0.251224	0.505735	0	0	3.696124486200822	5.105858961960445	SLC27A1
Inner Ear Morphogenesis (GO:0042472)	1/14	0.251224	0.505735	0	0	3.696124486200822	5.105858961960445	HPN
Positive Regulation of Triglyceride Metabolic Process (GO:0090208)	1/14	0.251224	0.505735	0	0	3.696124486200822	5.105858961960445	SLC27A1
Prostanoid Metabolic Process (GO:0006692)	1/14	0.251224	0.505735	0	0	3.696124486200822	5.105858961960445	PTGR1
Protein Insertion Into Membrane (GO:0051205)	1/14	0.251224	0.505735	0	0	3.696124486200822	5.105858961960445	GRIN3B
Macrophage Activation (GO:0042116)	1/14	0.251224	0.505735	0	0	3.696124486200822	5.105858961960445	PLCG2
rRNA Catabolic Process (GO:0016075)	1/14	0.251224	0.505735	0	0	3.696124486200822	5.105858961960445	ERN2
Mitotic G1/S Transition Checkpoint Signaling (GO:0044819)	1/14	0.251224	0.505735	0	0	3.696124486200822	5.105858961960445	MUC1
Muscle Cell Development (GO:0055001)	1/14	0.251224	0.505735	0	0	3.696124486200822	5.105858961960445	ACTN3
Regulation of Calcium Ion Transmembrane Transporter Activity (GO:1901019)	1/14	0.251224	0.505735	0	0	3.696124486200822	5.105858961960445	AHNAK
Regulation of Cardiac Conduction (GO:1903779)	1/14	0.251224	0.505735	0	0	3.696124486200822	5.105858961960445	ATP2B4
Modulation of Chemical Synaptic Transmission (GO:0050804)	3/85	0.251762	0.506082	0	0	1.7617260787992495	2.429896305687301	GRIN3B;GRIK3;AGER
Sodium Ion Transmembrane Transport (GO:0035725)	2/48	0.257237	0.507798	0	0	2.0916208562385474	2.8399147698130656	SLC24A1;ATP1B2
Positive Regulation of Endocytosis (GO:0045807)	2/48	0.257237	0.507798	0	0	2.0916208562385474	2.8399147698130656	CLIP3;GAS6
Glycoprotein Metabolic Process (GO:0009100)	2/48	0.257237	0.507798	0	0	2.0916208562385474	2.8399147698130656	GCNT1;NCCRP1
Cytokine-Mediated Signaling Pathway (GO:0019221)	4/126	0.257304	0.507798	0	0	1.579846825748465	2.144640192181085	STAT5A;IL11;HCK;OAS3
Positive Regulation of Protein Localization (GO:1903829)	3/87	0.262793	0.507798	0	0	1.7195054945054946	2.297928139316546	NECAB2;SYT12;GAS8
Negative Regulation of Apoptotic Process (GO:0043066)	9/341	0.263891	0.507798	0	0	1.3095294564083104	1.7445780629796008	PRKCG;IL11;HCK;TOX3;HPN;AGAP2;GAS6;FSTL1;ICAM1
Negative Regulation of Intrinsic Apoptotic Signaling Pathway (GO:2001243)	2/49	0.264849	0.507798	0	0	2.0469552457813647	2.7195730645657443	CREB3L4;ARHGEF2
Sensory Perception of Light Stimulus (GO:0050953)	2/49	0.264849	0.507798	0	0	2.0469552457813647	2.7195730645657443	SLC24A1;CACNA1F
Long-Chain Fatty Acid Metabolic Process (GO:0001676)	2/49	0.264849	0.507798	0	0	2.0469552457813647	2.7195730645657443	SLC27A1;PTGR1
Regulation of Collagen Biosynthetic Process (GO:0032965)	1/15	0.266548	0.507798	0	0	3.4318429661941114	4.537582202300817	WNT4
Actin Filament Capping (GO:0051693)	1/15	0.266548	0.507798	0	0	3.4318429661941114	4.537582202300817	TRIOBP
Activin Receptor Signaling Pathway (GO:0032924)	1/15	0.266548	0.507798	0	0	3.4318429661941114	4.537582202300817	GDF11
Amino Acid Catabolic Process (GO:0009063)	1/15	0.266548	0.507798	0	0	3.4318429661941114	4.537582202300817	LDHD
Regulation of Neurotransmitter Receptor Activity (GO:0099601)	1/15	0.266548	0.507798	0	0	3.4318429661941114	4.537582202300817	CACNG8
Neuron Maturation (GO:0042551)	1/15	0.266548	0.507798	0	0	3.4318429661941114	4.537582202300817	LGI4
Barbed-End Actin Filament Capping (GO:0051016)	1/15	0.266548	0.507798	0	0	3.4318429661941114	4.537582202300817	TRIOBP
Branched-Chain Amino Acid Metabolic Process (GO:0009081)	1/15	0.266548	0.507798	0	0	3.4318429661941114	4.537582202300817	LDHD
cAMP-mediated Signaling (GO:0019933)	1/15	0.266548	0.507798	0	0	3.4318429661941114	4.537582202300817	PDE6B
Regulation of Vesicle Size (GO:0097494)	1/15	0.266548	0.507798	0	0	3.4318429661941114	4.537582202300817	DNM1
Positive Regulation of Alcohol Biosynthetic Process (GO:1902932)	1/15	0.266548	0.507798	0	0	3.4318429661941114	4.537582202300817	WNT4
Collagen Catabolic Process (GO:0030574)	1/15	0.266548	0.507798	0	0	3.4318429661941114	4.537582202300817	KLK6
Cytoskeleton-Dependent Intracellular Transport (GO:0030705)	1/15	0.266548	0.507798	0	0	3.4318429661941114	4.537582202300817	DYNC1I1
Positive Regulation of Cholesterol Efflux (GO:0010875)	1/15	0.266548	0.507798	0	0	3.4318429661941114	4.537582202300817	ABCA3
Sulfur Compound Transport (GO:0072348)	1/15	0.266548	0.507798	0	0	3.4318429661941114	4.537582202300817	SLC27A1
Positive Regulation of Immune System Process (GO:0002684)	1/15	0.266548	0.507798	0	0	3.4318429661941114	4.537582202300817	MADCAM1
Positive Regulation of Interleukin-10 Production (GO:0032733)	1/15	0.266548	0.507798	0	0	3.4318429661941114	4.537582202300817	PLCG2
Positive Regulation of Interleukin-2 Production (GO:0032743)	1/15	0.266548	0.507798	0	0	3.4318429661941114	4.537582202300817	PLCG2
Glycerophospholipid Catabolic Process (GO:0046475)	1/15	0.266548	0.507798	0	0	3.4318429661941114	4.537582202300817	PLA2G6
Positive Regulation of Potassium Ion Transmembrane Transport (GO:1901381)	1/15	0.266548	0.507798	0	0	3.4318429661941114	4.537582202300817	ATP1B2
Positive Regulation of Synaptic Transmission, Glutamatergic (GO:0051968)	1/15	0.266548	0.507798	0	0	3.4318429661941114	4.537582202300817	CACNG8
Positive Regulation of Vascular Associated Smooth Muscle Cell Proliferation (GO:1904707)	1/15	0.266548	0.507798	0	0	3.4318429661941114	4.537582202300817	IGFBP5
Mammary Gland Development (GO:0030879)	1/15	0.266548	0.507798	0	0	3.4318429661941114	4.537582202300817	WNT4
Protein Localization to Synapse (GO:0035418)	1/15	0.266548	0.507798	0	0	3.4318429661941114	4.537582202300817	NPHS1
Monocarboxylic Acid Catabolic Process (GO:0072329)	1/15	0.266548	0.507798	0	0	3.4318429661941114	4.537582202300817	LDHD
Regulation of RIG-I Signaling Pathway (GO:0039535)	1/15	0.266548	0.507798	0	0	3.4318429661941114	4.537582202300817	DDX60
Reg of Cardiac Muscle Contraction by Reg of the Release of Sequestered Calcium Ion (GO:0010881)	1/15	0.266548	0.507798	0	0	3.4318429661941114	4.537582202300817	HRC
Negative Regulation of Blood Coagulation (GO:0030195)	1/15	0.266548	0.507798	0	0	3.4318429661941114	4.537582202300817	PDGFA
Negative Regulation of Cell Communication (GO:0010648)	1/15	0.266548	0.507798	0	0	3.4318429661941114	4.537582202300817	IL11
Negative Regulation of Extrinsic Apoptotic Signaling Pathway (GO:2001237)	2/50	0.272462	0.515139	0	0	2.0041507024265646	2.605908821798456	ARHGEF2;ICAM1
Regulation of Neuron Differentiation (GO:0045664)	2/50	0.272462	0.515139	0	0	2.0041507024265646	2.605908821798456	ZFHX2;ARHGEF2
Lymphocyte Differentiation (GO:0030098)	2/50	0.272462	0.515139	0	0	2.0041507024265646	2.605908821798456	IL11;PLCG2
B Cell Activation (GO:0042113)	2/51	0.280072	0.515139	0	0	1.9630932832903276	2.498445909580344	IL11;PLCG2
Negative Regulation of Epithelial Cell Proliferation (GO:0050680)	2/51	0.280072	0.515139	0	0	1.9630932832903276	2.498445909580344	MAGED1;HPN
Positive Regulation of Type I Interferon Production (GO:0032481)	2/51	0.280072	0.515139	0	0	1.9630932832903276	2.498445909580344	OAS3;TICAM1
B Cell Receptor Signaling Pathway (GO:0050853)	1/16	0.28156	0.515139	0	0	3.202798982188295	4.059261101695968	PLCG2
Negative Regulation of Extrinsic Apoptotic Signaling Pathway via Death Domain Receptors (GO:1902042)	1/16	0.28156	0.515139	0	0	3.202798982188295	4.059261101695968	ICAM1
Regulation of Lipid Biosynthetic Process (GO:0046890)	1/16	0.28156	0.515139	0	0	3.202798982188295	4.059261101695968	MLXIPL
Amide Transport (GO:0042886)	1/16	0.28156	0.515139	0	0	3.202798982188295	4.059261101695968	SLC27A1
Regulation of Myeloid Cell Differentiation (GO:0045637)	1/16	0.28156	0.515139	0	0	3.202798982188295	4.059261101695968	L3MBTL1
Negative Regulation of Telomere Maintenance (GO:0032205)	1/16	0.28156	0.515139	0	0	3.202798982188295	4.059261101695968	ERCC1
Amyloid Precursor Protein Metabolic Process (GO:0042982)	1/16	0.28156	0.515139	0	0	3.202798982188295	4.059261101695968	KLK6
Regulation of Necroptotic Process (GO:0060544)	1/16	0.28156	0.515139	0	0	3.202798982188295	4.059261101695968	ARHGEF2
Negative Regulation of Type I Interferon-Mediated Signaling Pathway (GO:0060339)	1/16	0.28156	0.515139	0	0	3.202798982188295	4.059261101695968	OAS3
Branched-Chain Amino Acid Catabolic Process (GO:0009083)	1/16	0.28156	0.515139	0	0	3.202798982188295	4.059261101695968	LDHD
Cardiac Muscle Tissue Morphogenesis (GO:0055008)	1/16	0.28156	0.515139	0	0	3.202798982188295	4.059261101695968	TNNI3
Phosphatidylethanolamine Metabolic Process (GO:0046337)	1/16	0.28156	0.515139	0	0	3.202798982188295	4.059261101695968	PLA2G6
Platelet-Derived Growth Factor Receptor Signaling Pathway (GO:0048008)	1/16	0.28156	0.515139	0	0	3.202798982188295	4.059261101695968	PDGFA
poly(A)+ mRNA Export From Nucleus (GO:0016973)	1/16	0.28156	0.515139	0	0	3.202798982188295	4.059261101695968	DDX25
Response to Exogenous dsRNA (GO:0043330)	1/16	0.28156	0.515139	0	0	3.202798982188295	4.059261101695968	TICAM1
Positive Regulation of NLRP3 Inflammasome Complex Assembly (GO:1900227)	1/16	0.28156	0.515139	0	0	3.202798982188295	4.059261101695968	PLCG2
Cilium Movement (GO:0003341)	1/16	0.28156	0.515139	0	0	3.202798982188295	4.059261101695968	GAS8
Positive Regulation of Heart Contraction (GO:0045823)	1/16	0.28156	0.515139	0	0	3.202798982188295	4.059261101695968	HRC
Positive Regulation of Inflammasome-Mediated Signaling Pathway (GO:0141087)	1/16	0.28156	0.515139	0	0	3.202798982188295	4.059261101695968	PLCG2
Positive Regulation of Lipid Metabolic Process (GO:0045834)	1/16	0.28156	0.515139	0	0	3.202798982188295	4.059261101695968	MLXIPL
Glycoprotein Catabolic Process (GO:0006516)	1/16	0.28156	0.515139	0	0	3.202798982188295	4.059261101695968	NCCRP1
Heterotypic Cell-Cell Adhesion (GO:0034113)	1/16	0.28156	0.515139	0	0	3.202798982188295	4.059261101695968	MADCAM1
Positive Regulation of Smoothened Signaling Pathway (GO:0045880)	1/16	0.28156	0.515139	0	0	3.202798982188295	4.059261101695968	GAS8
Negative Regulation of Cation Channel Activity (GO:2001258)	1/16	0.28156	0.515139	0	0	3.202798982188295	4.059261101695968	TRDN
Adenylate Cyclase-Modulating G Protein-Coupled Receptor Signaling Pathway (GO:0007188)	3/91	0.285022	0.520099	0	0	1.6408216783216782	2.0595410510423826	ADGRG1;CALCRL;ADCY7
Regulation of Neuron Apoptotic Process (GO:0043523)	3/91	0.285022	0.520099	0	0	1.6408216783216782	2.0595410510423826	PRKCG;TOX3;AGAP2
Positive Regulation of Protein Localization to Cell Periphery (GO:1904377)	2/52	0.287676	0.524252	0	0	1.9236781609195401	2.3967501622635394	CLIP3;ATP2B4
Negative Regulation of Cell Population Proliferation (GO:0008285)	7/264	0.295852	0.527413	0	0	1.313457563229572	1.5996537200640006	MN1;KLF11;ADGRG1;IGFBP5;MAGED1;HPN;GAS8
Alpha-Amino Acid Catabolic Process (GO:1901606)	1/17	0.296265	0.527413	0	0	3.002385496183206	3.652403211311509	ACADSB
Apoptotic Cell Clearance (GO:0043277)	1/17	0.296265	0.527413	0	0	3.002385496183206	3.652403211311509	GAS6
Regulation of Reactive Oxygen Species Biosynthetic Process (GO:1903426)	1/17	0.296265	0.527413	0	0	3.002385496183206	3.652403211311509	PLCG2
Regulation of Sodium Ion Transmembrane Transport (GO:1902305)	1/17	0.296265	0.527413	0	0	3.002385496183206	3.652403211311509	ATP2B4
Piecemeal Microautophagy of the Nucleus (GO:0034727)	1/17	0.296265	0.527413	0	0	3.002385496183206	3.652403211311509	ULK2
Positive Regulation of Calcium Ion Transmembrane Transporter Activity (GO:1901021)	1/17	0.296265	0.527413	0	0	3.002385496183206	3.652403211311509	TRDN
Positive Regulation of Cell Cycle Phase Transition (GO:1901989)	1/17	0.296265	0.527413	0	0	3.002385496183206	3.652403211311509	PLCG2
Gluconeogenesis (GO:0006094)	1/17	0.296265	0.527413	0	0	3.002385496183206	3.652403211311509	ENO3
Glycogen Metabolic Process (GO:0005977)	1/17	0.296265	0.527413	0	0	3.002385496183206	3.652403211311509	GAA
Inositol Phosphate Metabolic Process (GO:0043647)	1/17	0.296265	0.527413	0	0	3.002385496183206	3.652403211311509	OCRL
Intermediate Filament Organization (GO:0045109)	1/17	0.296265	0.527413	0	0	3.002385496183206	3.652403211311509	KRT7
Positive Regulation of Viral Life Cycle (GO:1903902)	1/17	0.296265	0.527413	0	0	3.002385496183206	3.652403211311509	TRIM38
Potassium Ion Homeostasis (GO:0055075)	1/17	0.296265	0.527413	0	0	3.002385496183206	3.652403211311509	ATP1B2
Long-Chain Fatty Acid Transport (GO:0015909)	1/17	0.296265	0.527413	0	0	3.002385496183206	3.652403211311509	SLC27A1
Receptor Clustering (GO:0043113)	1/17	0.296265	0.527413	0	0	3.002385496183206	3.652403211311509	MADCAM1
Regulation of Amyloid Precursor Protein Catabolic Process (GO:1902991)	1/17	0.296265	0.527413	0	0	3.002385496183206	3.652403211311509	AGER
Negative Regulation of DNA-templated Transcription, Elongation (GO:0032785)	1/17	0.296265	0.527413	0	0	3.002385496183206	3.652403211311509	RECQL5
Skeletal System Development (GO:0001501)	3/94	0.301796	0.534508	0	0	1.586348267117498	1.9004509989045792	GDF11;COL1A2;NCAN
Glycerophospholipid Biosynthetic Process (GO:0046474)	3/95	0.3074	0.534508	0	0	1.568979933110368	1.8507786842174931	PITPNM3;PLCG2;OCRL
Mitotic DNA Damage Checkpoint Signaling (GO:0044773)	2/55	0.310424	0.534508	0	0	1.8143569724571675	2.1224648938471593	MUC1;EME1
ADP Catabolic Process (GO:0046032)	1/18	0.310671	0.534508	0	0	2.8255500673551865	3.3031298340241917	ENO3
GPCR Sgnlng Pway, Coupled to Cyclic Nucleotide Second Messenger (GO:0007187)	1/18	0.310671	0.534508	0	0	2.8255500673551865	3.3031298340241917	CALCRL
Negative Regulation of Lipid Biosynthetic Process (GO:0051055)	1/18	0.310671	0.534508	0	0	2.8255500673551865	3.3031298340241917	WNT4
NADP Metabolic Process (GO:0006739)	1/18	0.310671	0.534508	0	0	2.8255500673551865	3.3031298340241917	FMO4
Regulation of Integrin-Mediated Signaling Pathway (GO:2001044)	1/18	0.310671	0.534508	0	0	2.8255500673551865	3.3031298340241917	NID1
Negative Regulation of Response to Wounding (GO:1903035)	1/18	0.310671	0.534508	0	0	2.8255500673551865	3.3031298340241917	FIGNL2
Regulation of Muscle Contraction (GO:0006937)	1/18	0.310671	0.534508	0	0	2.8255500673551865	3.3031298340241917	TNNI3
Regulation of Platelet Activation (GO:0010543)	1/18	0.310671	0.534508	0	0	2.8255500673551865	3.3031298340241917	PDGFA
Axoneme Assembly (GO:0035082)	1/18	0.310671	0.534508	0	0	2.8255500673551865	3.3031298340241917	GAS8
Phosphatidylinositol-Mediated Signaling (GO:0048015)	1/18	0.310671	0.534508	0	0	2.8255500673551865	3.3031298340241917	PLCG2
Plasma Membrane Repair (GO:0001778)	1/18	0.310671	0.534508	0	0	2.8255500673551865	3.3031298340241917	SYT12
Chromosome Condensation (GO:0030261)	1/18	0.310671	0.534508	0	0	2.8255500673551865	3.3031298340241917	ERN2
Reticulophagy (GO:0061709)	1/18	0.310671	0.534508	0	0	2.8255500673551865	3.3031298340241917	ULK2
Positive Regulation of Cholesterol Transport (GO:0032376)	1/18	0.310671	0.534508	0	0	2.8255500673551865	3.3031298340241917	ABCA3
Positive Regulation of Extracellular Matrix Organization (GO:1903055)	1/18	0.310671	0.534508	0	0	2.8255500673551865	3.3031298340241917	TNXB
Endothelial Cell Development (GO:0001885)	1/18	0.310671	0.534508	0	0	2.8255500673551865	3.3031298340241917	ICAM1
Triglyceride Homeostasis (GO:0070328)	1/18	0.310671	0.534508	0	0	2.8255500673551865	3.3031298340241917	MLXIPL
Glial Cell Development (GO:0021782)	1/18	0.310671	0.534508	0	0	2.8255500673551865	3.3031298340241917	MXRA8
Glycolytic Process (GO:0006096)	1/18	0.310671	0.534508	0	0	2.8255500673551865	3.3031298340241917	ENO3
Hepaticobiliary System Development (GO:0061008)	1/18	0.310671	0.534508	0	0	2.8255500673551865	3.3031298340241917	WNT4
Prostaglandin Metabolic Process (GO:0006693)	1/18	0.310671	0.534508	0	0	2.8255500673551865	3.3031298340241917	PTGR1
Regulation of Biomineral Tissue Development (GO:0070167)	1/18	0.310671	0.534508	0	0	2.8255500673551865	3.3031298340241917	GAS6
Regulation of Cellular Response to Growth Factor Stimulus (GO:0090287)	1/18	0.310671	0.534508	0	0	2.8255500673551865	3.3031298340241917	FSTL1
Regulation of Chemokine Production (GO:0032642)	1/18	0.310671	0.534508	0	0	2.8255500673551865	3.3031298340241917	AGER
Recombinational Repair (GO:0000725)	3/96	0.313007	0.53786	0	0	1.551985111662531	1.8026753144584047	RECQL5;KDM4D;MEIOB
Ras Protein Signal Transduction (GO:0007265)	2/56	0.317976	0.544372	0	0	1.7806158649070527	2.0401919965698525	RGL3;RASGRP2
Integrin-Mediated Signaling Pathway (GO:0007229)	2/56	0.317976	0.544372	0	0	1.7806158649070527	2.0401919965698525	HCK;MADCAM1
Negative Regulation of Blood Vessel Morphogenesis (GO:2000181)	2/56	0.317976	0.544372	0	0	1.7806158649070527	2.0401919965698525	ATP2B4;WNT4
Protein Phosphorylation (GO:0006468)	8/317	0.322585	0.547231	0	0	1.248099498699156	1.4120859732222382	PRKCG;MAPK10;HCK;ERN2;PDK3;ULK2;GAS6;EPHB1
NADH Metabolic Process (GO:0006734)	1/19	0.324782	0.547231	0	0	2.6683630195080577	3.000840736868314	ENO3
acyl-CoA Metabolic Process (GO:0006637)	1/19	0.324782	0.547231	0	0	2.6683630195080577	3.000840736868314	ACSF2
Alpha-Amino Acid Metabolic Process (GO:1901605)	1/19	0.324782	0.547231	0	0	2.6683630195080577	3.000840736868314	DPEP1
Negative Regulation of Wound Healing (GO:0061045)	1/19	0.324782	0.547231	0	0	2.6683630195080577	3.000840736868314	FIGNL2
Cellular Response to Xenobiotic Stimulus (GO:0071466)	1/19	0.324782	0.547231	0	0	2.6683630195080577	3.000840736868314	GAS6
Positive Regulation of Calcium Ion Transport (GO:0051928)	1/19	0.324782	0.547231	0	0	2.6683630195080577	3.000840736868314	CREB3L4
Positive Regulation of Cytokine Production Involved in Immune Response (GO:0002720)	1/19	0.324782	0.547231	0	0	2.6683630195080577	3.000840736868314	PLCG2
Endoplasmic Reticulum Calcium Ion Homeostasis (GO:0032469)	1/19	0.324782	0.547231	0	0	2.6683630195080577	3.000840736868314	CLCC1
Entrainment of Circadian Clock by Photoperiod (GO:0043153)	1/19	0.324782	0.547231	0	0	2.6683630195080577	3.000840736868314	PDE6B
Type I Interferon-Mediated Signaling Pathway (GO:0060337)	1/19	0.324782	0.547231	0	0	2.6683630195080577	3.000840736868314	OAS3
Focal Adhesion Assembly (GO:0048041)	1/19	0.324782	0.547231	0	0	2.6683630195080577	3.000840736868314	ACTN3
Morphogenesis of an Epithelium (GO:0002009)	1/19	0.324782	0.547231	0	0	2.6683630195080577	3.000840736868314	GREB1L
Positive Regulation of Macromolecule Biosynthetic Process (GO:0010557)	6/229	0.327218	0.550665	0	0	1.295981574217864	1.4477767942526165	CALCOCO1;HPN;PLCG2;GAS6;TICAM1;CTCFL
Regulation of Gene Expression (GO:0010468)	19/825	0.328227	0.551692	0	0	1.1396290119188057	1.2696040574496559	ZNF100;CALCOCO1;AHNAK;KDM4D;MAGED1;HPN;ONECUT1;ATP2B4;YBX2;TICAM1;ZBTB4;MLLT6;CTCFL;MLXIPL;ZNF516;PLCG2;TRIM38;GAS6;WNT4
Membrane Organization (GO:0061024)	4/142	0.330644	0.555081	0	0	1.3948855687986124	1.5437386190293545	GRIN3B;OCRL;TLCD2;TRDN
Regulation of Fatty Acid Biosynthetic Process (GO:0042304)	1/20	0.338606	0.556971	0	0	2.527721976697469	2.7373135964261643	MLXIPL
Negative Regulation of Intrinsic Apoptotic Signaling Pathway in Response to DNA Damage (GO:1902230)	1/20	0.338606	0.556971	0	0	2.527721976697469	2.7373135964261643	MUC1
Regulation of Interleukin-10 Production (GO:0032653)	1/20	0.338606	0.556971	0	0	2.527721976697469	2.7373135964261643	PLCG2
Regulation of Muscle Cell Differentiation (GO:0051147)	1/20	0.338606	0.556971	0	0	2.527721976697469	2.7373135964261643	NID1
Negative Regulation of Stress Fiber Assembly (GO:0051497)	1/20	0.338606	0.556971	0	0	2.527721976697469	2.7373135964261643	F11R
Regulation of Myelination (GO:0031641)	1/20	0.338606	0.556971	0	0	2.527721976697469	2.7373135964261643	LGI4
Regulation of Platelet Aggregation (GO:0090330)	1/20	0.338606	0.556971	0	0	2.527721976697469	2.7373135964261643	F11R
Axon Extension (GO:0048675)	1/20	0.338606	0.556971	0	0	2.527721976697469	2.7373135964261643	ULK2
Regulation of Protein Export From Nucleus (GO:0046825)	1/20	0.338606	0.556971	0	0	2.527721976697469	2.7373135964261643	GAS6
Nucleoside Phosphate Metabolic Process (GO:0006753)	1/20	0.338606	0.556971	0	0	2.527721976697469	2.7373135964261643	ACSF2
Photoperiodism (GO:0009648)	1/20	0.338606	0.556971	0	0	2.527721976697469	2.7373135964261643	PDE6B
Positive Regulation of ATP Metabolic Process (GO:1903580)	1/20	0.338606	0.556971	0	0	2.527721976697469	2.7373135964261643	MLXIPL
Cellular Response to Type I Interferon (GO:0071357)	1/20	0.338606	0.556971	0	0	2.527721976697469	2.7373135964261643	OAS3
Superoxide Metabolic Process (GO:0006801)	1/20	0.338606	0.556971	0	0	2.527721976697469	2.7373135964261643	MB
Toll-Like Receptor 4 Signaling Pathway (GO:0034142)	1/20	0.338606	0.556971	0	0	2.527721976697469	2.7373135964261643	TICAM1
Hexose Biosynthetic Process (GO:0019319)	1/20	0.338606	0.556971	0	0	2.527721976697469	2.7373135964261643	ENO3
Microautophagy (GO:0016237)	1/20	0.338606	0.556971	0	0	2.527721976697469	2.7373135964261643	ULK2
Plasma Membrane Organization (GO:0007009)	2/59	0.340507	0.558771	0	0	1.6864959333198897	1.8168926562974788	SYT12;TLCD2
Wound Healing (GO:0042060)	2/59	0.340507	0.558771	0	0	1.6864959333198897	1.8168926562974788	SYT12;PDGFA
Negative Regulation of Supramolecular Fiber Organization (GO:1902904)	2/60	0.347969	0.562544	0	0	1.657286299379046	1.749502883058714	CLIP3;ARHGEF2
Protein Tetramerization (GO:0051262)	2/60	0.347969	0.562544	0	0	1.657286299379046	1.749502883058714	MAT1A;DNM1
Negative Regulation of Cytokine Production Involved in Inflammatory Response (GO:1900016)	1/21	0.352148	0.562544	0	0	2.401145038167939	2.506082378323433	ADCY7
Reg of Endoplasmic Reticulum Stress-Induced Intrinsic Apoptotic Sgnlng Pway (GO:1902235)	1/21	0.352148	0.562544	0	0	2.401145038167939	2.506082378323433	CREB3L4
DNA Repair-Dependent Chromatin Remodeling (GO:0140861)	1/21	0.352148	0.562544	0	0	2.401145038167939	2.506082378323433	ZNF83
Regulation of Extracellular Matrix Organization (GO:1903053)	1/21	0.352148	0.562544	0	0	2.401145038167939	2.506082378323433	NID1
Regulation of Insulin Secretion Involved in Cellular Response to Glucose Stimulus (GO:0061178)	1/21	0.352148	0.562544	0	0	2.401145038167939	2.506082378323433	PLA2G6
Regulation of Long-Term Synaptic Potentiation (GO:1900271)	1/21	0.352148	0.562544	0	0	2.401145038167939	2.506082378323433	AGER
Actin Filament Polymerization (GO:0030041)	1/21	0.352148	0.562544	0	0	2.401145038167939	2.506082378323433	TTC17
Negative Regulation of Signaling (GO:0023057)	1/21	0.352148	0.562544	0	0	2.401145038167939	2.506082378323433	IL11
Amino Acid Metabolic Process (GO:0006520)	1/21	0.352148	0.562544	0	0	2.401145038167939	2.506082378323433	PAH
Carbohydrate Derivative Catabolic Process (GO:1901136)	1/21	0.352148	0.562544	0	0	2.401145038167939	2.506082378323433	NCCRP1
Carboxylic Acid Catabolic Process (GO:0046395)	1/21	0.352148	0.562544	0	0	2.401145038167939	2.506082378323433	LDHD
Peptide Hormone Processing (GO:0016486)	1/21	0.352148	0.562544	0	0	2.401145038167939	2.506082378323433	SCG5
Cellular Response to Hexose Stimulus (GO:0071331)	1/21	0.352148	0.562544	0	0	2.401145038167939	2.506082378323433	GAS6
Positive Regulation of Cation Channel Activity (GO:2001259)	1/21	0.352148	0.562544	0	0	2.401145038167939	2.506082378323433	TRDN
Dendritic Spine Organization (GO:0097061)	1/21	0.352148	0.562544	0	0	2.401145038167939	2.506082378323433	EPHB1
Development of Primary Male Sexual Characteristics (GO:0046546)	1/21	0.352148	0.562544	0	0	2.401145038167939	2.506082378323433	WNT4
Ventricular Cardiac Muscle Tissue Morphogenesis (GO:0055010)	1/21	0.352148	0.562544	0	0	2.401145038167939	2.506082378323433	TNNI3
Heterophilic Cell-Cell Adhesion via Plasma Membrane Cell Adhesion Molecules (GO:0007157)	1/21	0.352148	0.562544	0	0	2.401145038167939	2.506082378323433	ICAM1
Protein Localization to Chromatin (GO:0071168)	1/21	0.352148	0.562544	0	0	2.401145038167939	2.506082378323433	CTCFL
Male Gonad Development (GO:0008584)	1/21	0.352148	0.562544	0	0	2.401145038167939	2.506082378323433	WNT4
Negative Regulation of Axonogenesis (GO:0050771)	1/21	0.352148	0.562544	0	0	2.401145038167939	2.506082378323433	ULK2
Establishment of Protein Localization to Membrane (GO:0090150)	2/61	0.355401	0.567086	0	0	1.6290668225209428	1.6852815104597847	GRIN3B;ZDHHC11
Regulation of Cell Adhesion (GO:0030155)	3/105	0.363454	0.569289	0	0	1.414027149321267	1.4311422095177126	ADGRG1;TNXB;NID1
Negative Regulation of Endothelial Cell Migration (GO:0010596)	1/22	0.365414	0.569289	0	0	2.286623046165031	2.3019993425388674	ATP2B4
Regulation of Protein Localization to Membrane (GO:1905475)	1/22	0.365414	0.569289	0	0	2.286623046165031	2.3019993425388674	NECAB2
Nucleophagy (GO:0044804)	1/22	0.365414	0.569289	0	0	2.286623046165031	2.3019993425388674	ULK2
Odontogenesis (GO:0042476)	1/22	0.365414	0.569289	0	0	2.286623046165031	2.3019993425388674	COL1A2
Cell Surface Toll-Like Receptor Signaling Pathway (GO:0140895)	1/22	0.365414	0.569289	0	0	2.286623046165031	2.3019993425388674	TICAM1
Sulfur Compound Catabolic Process (GO:0044273)	1/22	0.365414	0.569289	0	0	2.286623046165031	2.3019993425388674	DPEP1
Fatty Acid Transport (GO:0015908)	1/22	0.365414	0.569289	0	0	2.286623046165031	2.3019993425388674	SLC27A1
Vacuolar Acidification (GO:0007035)	1/22	0.365414	0.569289	0	0	2.286623046165031	2.3019993425388674	ATP6V0A4
Vesicle Cytoskeletal Trafficking (GO:0099518)	1/22	0.365414	0.569289	0	0	2.286623046165031	2.3019993425388674	DYNC1I1
Vesicle Transport Along Microtubule (GO:0047496)	1/22	0.365414	0.569289	0	0	2.286623046165031	2.3019993425388674	DYNC1I1
Vitamin Transport (GO:0051180)	1/22	0.365414	0.569289	0	0	2.286623046165031	2.3019993425388674	SLC27A1
Positive Regulation of Release of Sequestered Calcium Ion Into Cytosol (GO:0051281)	1/22	0.365414	0.569289	0	0	2.286623046165031	2.3019993425388674	TRDN
Long-Term Synaptic Potentiation (GO:0060291)	1/22	0.365414	0.569289	0	0	2.286623046165031	2.3019993425388674	SLC24A1
Protein Palmitoylation (GO:0018345)	1/22	0.365414	0.569289	0	0	2.286623046165031	2.3019993425388674	ZDHHC11
Pyridine Nucleotide Catabolic Process (GO:0019364)	1/22	0.365414	0.569289	0	0	2.286623046165031	2.3019993425388674	ENO3
Muscle Cell Differentiation (GO:0042692)	1/22	0.365414	0.569289	0	0	2.286623046165031	2.3019993425388674	ACTN3
Negative Chemotaxis (GO:0050919)	1/22	0.365414	0.569289	0	0	2.286623046165031	2.3019993425388674	PDGFA
Negative Regulation of Actin Filament Bundle Assembly (GO:0032232)	1/22	0.365414	0.569289	0	0	2.286623046165031	2.3019993425388674	F11R
Negative Regulation of Blood Vessel Endothelial Cell Migration (GO:0043537)	1/22	0.365414	0.569289	0	0	2.286623046165031	2.3019993425388674	ATP2B4
Regulation of Cholesterol Efflux (GO:0010874)	1/22	0.365414	0.569289	0	0	2.286623046165031	2.3019993425388674	ABCA3
Regulation of Cell Population Proliferation (GO:0042127)	12/517	0.367767	0.572311	0	0	1.1452329296674688	1.1455845004816665	STAT5A;IL11;HCK;MLXIPL;KLF11;ADGRG1;TNXB;CREB3L4;PDGFA;ARHGEF2;NCCRP1;GAS8
Regulation of Epithelial Cell Proliferation (GO:0050678)	2/64	0.377512	0.581038	0	0	1.549870226177234	1.5098116931542058	MAGED1;HPN
Wnt Signaling Pathway (GO:0016055)	2/64	0.377512	0.581038	0	0	1.549870226177234	1.5098116931542058	PLCG2;WNT4
Positive Regulation of Cell Adhesion (GO:0045785)	2/64	0.377512	0.581038	0	0	1.549870226177234	1.5098116931542058	ADGRG1;NID1
Synapse Assembly (GO:0007416)	2/64	0.377512	0.581038	0	0	1.549870226177234	1.5098116931542058	SDK1;SDK2
Regulation of Extrinsic Apoptotic Signaling Pathway via Death Domain Receptors (GO:1902041)	1/23	0.378409	0.581038	0	0	2.1825121443442055	2.12092071372857	ICAM1
Negative Regulation of Proteolysis Involved in Protein Catabolic Process (GO:1903051)	1/23	0.378409	0.581038	0	0	2.1825121443442055	2.12092071372857	PRKCG
Response to Estrogen (GO:0043627)	1/23	0.378409	0.581038	0	0	2.1825121443442055	2.12092071372857	BCAS3
Positive Regulation of Substrate Adhesion-Dependent Cell Spreading (GO:1900026)	1/23	0.378409	0.581038	0	0	2.1825121443442055	2.12092071372857	TRIOBP
Potassium Ion Import Across Plasma Membrane (GO:1990573)	1/23	0.378409	0.581038	0	0	2.1825121443442055	2.12092071372857	ATP1B2
Regulation of Calcium Ion-Dependent Exocytosis (GO:0017158)	1/23	0.378409	0.581038	0	0	2.1825121443442055	2.12092071372857	SYT12
Regulation of Cation Channel Activity (GO:2001257)	1/23	0.378409	0.581038	0	0	2.1825121443442055	2.12092071372857	AHNAK
Regulation of Cell Junction Assembly (GO:1901888)	1/23	0.378409	0.581038	0	0	2.1825121443442055	2.12092071372857	F11R
Double-Strand Break Repair via Homologous Recombination (GO:0000724)	3/108	0.380172	0.583099	0	0	1.3732967032967034	1.3281581159659934	RECQL5;KDM4D;MEIOB
Autophagosome Assembly (GO:0000045)	2/65	0.384813	0.586285	0	0	1.5251474791704678	1.456512023405032	ATG16L2;ULK2
Regulation of Protein Kinase Activity (GO:0045859)	2/65	0.384813	0.586285	0	0	1.5251474791704678	1.456512023405032	AGAP2;GAS6
Heart Development (GO:0007507)	3/109	0.385725	0.586285	0	0	1.3602322206095792	1.2957983211959743	CCM2L;TNNI3;CRELD1
Regulation of Interleukin-12 Production (GO:0032655)	1/24	0.391139	0.586285	0	0	2.087454364420843	1.9594773459140666	PLCG2
Negative Regulation of Protein Polymerization (GO:0032272)	1/24	0.391139	0.586285	0	0	2.087454364420843	1.9594773459140666	CLIP3
Negative Regulation of Sequestering of Calcium Ion (GO:0051283)	1/24	0.391139	0.586285	0	0	2.087454364420843	1.9594773459140666	PLCG2
Negative Regulation of Smooth Muscle Cell Proliferation (GO:0048662)	1/24	0.391139	0.586285	0	0	2.087454364420843	1.9594773459140666	IGFBP5
Regulation of Potassium Ion Transport (GO:0043266)	1/24	0.391139	0.586285	0	0	2.087454364420843	1.9594773459140666	KCNIP1
Organic Hydroxy Compound Transport (GO:0015850)	1/24	0.391139	0.586285	0	0	2.087454364420843	1.9594773459140666	SLCO1A2
Regulation of Small Molecule Metabolic Process (GO:0062012)	1/24	0.391139	0.586285	0	0	2.087454364420843	1.9594773459140666	PDK3
Cell Surface Receptor Signaling Pathway via JAK-STAT (GO:0007259)	1/24	0.391139	0.586285	0	0	2.087454364420843	1.9594773459140666	STAT5A
Positive Regulation of Carbohydrate Metabolic Process (GO:0045913)	1/24	0.391139	0.586285	0	0	2.087454364420843	1.9594773459140666	MLXIPL
Sterol Biosynthetic Process (GO:0016126)	1/24	0.391139	0.586285	0	0	2.087454364420843	1.9594773459140666	FAXDC2
Synaptic Vesicle Endocytosis (GO:0048488)	1/24	0.391139	0.586285	0	0	2.087454364420843	1.9594773459140666	DNM1
Positive Regulation of Neuron Differentiation (GO:0045666)	1/24	0.391139	0.586285	0	0	2.087454364420843	1.9594773459140666	ARHGEF2
Glutathione Metabolic Process (GO:0006749)	1/24	0.391139	0.586285	0	0	2.087454364420843	1.9594773459140666	DPEP1
Intracellular pH Reduction (GO:0051452)	1/24	0.391139	0.586285	0	0	2.087454364420843	1.9594773459140666	ATP6V0A4
Microtubule Nucleation (GO:0007020)	1/24	0.391139	0.586285	0	0	2.087454364420843	1.9594773459140666	TUBG2
Regulation of DNA Biosynthetic Process (GO:2000278)	1/24	0.391139	0.586285	0	0	2.087454364420843	1.9594773459140666	PDGFA
Negative Regulation of DNA Metabolic Process (GO:0051053)	1/24	0.391139	0.586285	0	0	2.087454364420843	1.9594773459140666	ERCC1
Regulation of Cell Adhesion Mediated by Integrin (GO:0033628)	1/24	0.391139	0.586285	0	0	2.087454364420843	1.9594773459140666	MUC1
Inflammatory Response (GO:0006954)	3/111	0.396796	0.590284	0	0	1.3348290598290597	1.2338272539558937	KDM4D;F11R;AGER
Regulation of Defense Response (GO:0031347)	2/67	0.399303	0.590284	0	0	1.4779840848806367	1.356840927639902	HCK;AGER
Regulation of Epithelial to Mesenchymal Transition (GO:0010717)	2/67	0.399303	0.590284	0	0	1.4779840848806367	1.356840927639902	TNXB;HPN
Positive Regulation of Cold-Induced Thermogenesis (GO:0120162)	2/67	0.399303	0.590284	0	0	1.4779840848806367	1.356840927639902	ZNF516;YBX2
Positive Regulation of Protein Kinase Activity (GO:0045860)	2/67	0.399303	0.590284	0	0	1.4779840848806367	1.356840927639902	AGAP2;GAS6
Negative Regulation of Protein Metabolic Process (GO:0051248)	3/112	0.402312	0.590284	0	0	1.3224770642201835	1.2041530228250066	PRKCG;IGFBP5;AGAP2
Regulation of Dendritic Spine Morphogenesis (GO:0061001)	1/25	0.403609	0.590284	0	0	2.0003180661577606	1.8149048932894103	NGEF
Regulation of Developmental Growth (GO:0048638)	1/25	0.403609	0.590284	0	0	2.0003180661577606	1.8149048932894103	STAT5A
DNA-templated Transcription Elongation (GO:0006354)	1/25	0.403609	0.590284	0	0	2.0003180661577606	1.8149048932894103	TCEA2
Regulation of Glucose Metabolic Process (GO:0010906)	1/25	0.403609	0.590284	0	0	2.0003180661577606	1.8149048932894103	PDK3
Negative Regulation of Response to Endoplasmic Reticulum Stress (GO:1903573)	1/25	0.403609	0.590284	0	0	2.0003180661577606	1.8149048932894103	CREB3L4
Regulation of Regulated Secretory Pathway (GO:1903305)	1/25	0.403609	0.590284	0	0	2.0003180661577606	1.8149048932894103	SYT12
Cellular Response to Osmotic Stress (GO:0071470)	1/25	0.403609	0.590284	0	0	2.0003180661577606	1.8149048932894103	ARHGEF2
Positive Regulation of D-glucose Transmembrane Transport (GO:0010828)	1/25	0.403609	0.590284	0	0	2.0003180661577606	1.8149048932894103	CLIP3
Cytoplasmic Pattern Recognition Receptor Signaling Pathway (GO:0002753)	1/25	0.403609	0.590284	0	0	2.0003180661577606	1.8149048932894103	OAS3
Positive Regulation of Calcium Ion Transmembrane Transport (GO:1904427)	1/25	0.403609	0.590284	0	0	2.0003180661577606	1.8149048932894103	P2RX2
Positive Regulation of Peptidyl-Serine Phosphorylation (GO:0033138)	1/25	0.403609	0.590284	0	0	2.0003180661577606	1.8149048932894103	IL11
Gonad Development (GO:0008406)	1/25	0.403609	0.590284	0	0	2.0003180661577606	1.8149048932894103	WNT4
Intrinsic Apoptotic Signaling Pathway in Response to Endoplasmic Reticulum Stress (GO:0070059)	1/25	0.403609	0.590284	0	0	2.0003180661577606	1.8149048932894103	ERN2
Primary Alcohol Metabolic Process (GO:0034308)	1/25	0.403609	0.590284	0	0	2.0003180661577606	1.8149048932894103	SULT1C4
Liver Development (GO:0001889)	1/25	0.403609	0.590284	0	0	2.0003180661577606	1.8149048932894103	WNT4
Regulation of NLRP3 Inflammasome Complex Assembly (GO:1900225)	1/25	0.403609	0.590284	0	0	2.0003180661577606	1.8149048932894103	PLCG2
Regulation of Cardiac Muscle Contraction (GO:0055117)	1/25	0.403609	0.590284	0	0	2.0003180661577606	1.8149048932894103	TNNI3
Positive Regulation of Endothelial Cell Migration (GO:0010595)	2/68	0.406488	0.593868	0	0	1.4554742830604899	1.3102176566183683	STAT5A;BCAS3
Protein Autophosphorylation (GO:0046777)	3/114	0.4133	0.597425	0	0	1.2984407484407485	1.1472795020614583	HCK;ULK2;EPHB1
Regulation of Double-Strand Break Repair via Nonhomologous End Joining (GO:2001032)	1/26	0.415825	0.597425	0	0	1.9201526717557251	1.6849163293445415	KDM4D
Regulation of Interleukin-2 Production (GO:0032663)	1/26	0.415825	0.597425	0	0	1.9201526717557251	1.6849163293445415	PLCG2
Anterior/Posterior Pattern Specification (GO:0009952)	1/26	0.415825	0.597425	0	0	1.9201526717557251	1.6849163293445415	HES4
Regulation of Neuron Migration (GO:2001222)	1/26	0.415825	0.597425	0	0	1.9201526717557251	1.6849163293445415	ARHGEF2
Regulation of Nitric Oxide Biosynthetic Process (GO:0045428)	1/26	0.415825	0.597425	0	0	1.9201526717557251	1.6849163293445415	ATP2B4
Carbohydrate Catabolic Process (GO:0016052)	1/26	0.415825	0.597425	0	0	1.9201526717557251	1.6849163293445415	ENO3
Cardiac Ventricle Morphogenesis (GO:0003208)	1/26	0.415825	0.597425	0	0	1.9201526717557251	1.6849163293445415	TNNI3
Cell-Substrate Junction Assembly (GO:0007044)	1/26	0.415825	0.597425	0	0	1.9201526717557251	1.6849163293445415	ACTN3
Regulation of Vascular Associated Smooth Muscle Cell Proliferation (GO:1904705)	1/26	0.415825	0.597425	0	0	1.9201526717557251	1.6849163293445415	IGFBP5
Cellular Response to Type II Interferon (GO:0071346)	1/26	0.415825	0.597425	0	0	1.9201526717557251	1.6849163293445415	HCK
Response to Transforming Growth Factor Beta (GO:0071559)	1/26	0.415825	0.597425	0	0	1.9201526717557251	1.6849163293445415	WNT4
Vasculogenesis (GO:0001570)	1/26	0.415825	0.597425	0	0	1.9201526717557251	1.6849163293445415	TNNI3
Positive Regulation of Synapse Assembly (GO:0051965)	1/26	0.415825	0.597425	0	0	1.9201526717557251	1.6849163293445415	EPHB1
Monoatomic Cation Transport (GO:0006812)	1/26	0.415825	0.597425	0	0	1.9201526717557251	1.6849163293445415	GRIN3B
Regulation of Amyloid-Beta Formation (GO:1902003)	1/26	0.415825	0.597425	0	0	1.9201526717557251	1.6849163293445415	GSAP
Positive Regulation of Cell Migration (GO:0030335)	6/254	0.418424	0.600434	0	0	1.1629848123509476	1.0132623137520296	BCAS3;CREB3L4;PLCG2;PDGFA;MADCAM1;ARHGEF2
Chemical Synaptic Transmission (GO:0007268)	4/161	0.418786	0.600434	0	0	1.224208740132307	1.0655442831180892	GRIN3B;KCNIP1;GRIK3;SPG11
Regulation of Catabolic Process (GO:0009894)	2/71	0.427791	0.604583	0	0	1.3918596257426843	1.1818573170137963	ULK2;DEPP1
Negative Regulation of Endocytosis (GO:0045806)	1/27	0.427791	0.604583	0	0	1.8461538461538463	1.5676050695637025	SYT12
Negative Regulation of Epithelial to Mesenchymal Transition (GO:0010719)	1/27	0.427791	0.604583	0	0	1.8461538461538463	1.5676050695637025	HPN
Negative Regulation of Microtubule Polymerization or Depolymerization (GO:0031111)	1/27	0.427791	0.604583	0	0	1.8461538461538463	1.5676050695637025	CLIP3
Regulation of Protein Modification Process (GO:0031399)	1/27	0.427791	0.604583	0	0	1.8461538461538463	1.5676050695637025	KDM4D
Cellular Component Disassembly (GO:0022411)	1/27	0.427791	0.604583	0	0	1.8461538461538463	1.5676050695637025	KLK6
Cellular Response to cAMP (GO:0071320)	1/27	0.427791	0.604583	0	0	1.8461538461538463	1.5676050695637025	IGFBP5
Release of Sequestered Calcium Ion Into Cytosol (GO:0051209)	1/27	0.427791	0.604583	0	0	1.8461538461538463	1.5676050695637025	PLCG2
Clathrin-Dependent Endocytosis (GO:0072583)	1/27	0.427791	0.604583	0	0	1.8461538461538463	1.5676050695637025	DNM1
Positive Regulation of Interferon-Beta Production (GO:0032728)	1/27	0.427791	0.604583	0	0	1.8461538461538463	1.5676050695637025	OAS3
Establishment of Protein Localization to Extracellular Region (GO:0035592)	1/27	0.427791	0.604583	0	0	1.8461538461538463	1.5676050695637025	OLFM2
Positive Regulation of Monoatomic Ion Transport (GO:0043270)	1/27	0.427791	0.604583	0	0	1.8461538461538463	1.5676050695637025	CREB3L4
Icosanoid Metabolic Process (GO:0006690)	1/27	0.427791	0.604583	0	0	1.8461538461538463	1.5676050695637025	PTGR1
Mononuclear Cell Differentiation (GO:1903131)	1/27	0.427791	0.604583	0	0	1.8461538461538463	1.5676050695637025	GAS6
Protein O-linked Glycosylation (GO:0006493)	2/72	0.434803	0.613865	0	0	1.3718664477285167	1.1425766376428386	GCNT1;PLOD1
Negative Regulation of Developmental Growth (GO:0048640)	1/28	0.439514	0.616744	0	0	1.7776364150409951	1.461370513080468	ULK2
DNA Damage Response, Signal Transduction by P53 Class Mediator (GO:0030330)	1/28	0.439514	0.616744	0	0	1.7776364150409951	1.461370513080468	MUC1
Regulation of Neurotransmitter Secretion (GO:0046928)	1/28	0.439514	0.616744	0	0	1.7776364150409951	1.461370513080468	SYT12
Cell Surface Receptor Signaling Pathway via STAT (GO:0097696)	1/28	0.439514	0.616744	0	0	1.7776364150409951	1.461370513080468	STAT5A
Positive Regulation of SMAD Protein Signal Transduction (GO:0060391)	1/28	0.439514	0.616744	0	0	1.7776364150409951	1.461370513080468	GDF11
Positive Regulation of Myeloid Cell Differentiation (GO:0045639)	1/28	0.439514	0.616744	0	0	1.7776364150409951	1.461370513080468	FAXDC2
Regulation of Organelle Assembly (GO:1902115)	2/73	0.441768	0.618654	0	0	1.3524364578274244	1.1048995121423189	HCK;IFT140
Regulation of Protein Localization to Plasma Membrane (GO:1903076)	2/73	0.441768	0.618654	0	0	1.3524364578274244	1.1048995121423189	CLIP3;ATP2B4
Cell Junction Assembly (GO:0034329)	2/74	0.448687	0.622445	0	0	1.333546189868029	1.0687446673486838	SDK1;SDK2
Positive Regulation of NF-kappaB Transcription Factor Activity (GO:0051092)	2/74	0.448687	0.622445	0	0	1.333546189868029	1.0687446673486838	ARHGEF2;TRIM38
Defense Response to Bacterium (GO:0042742)	2/74	0.448687	0.622445	0	0	1.333546189868029	1.0687446673486838	OAS3;PLA2G6
Positive Regulation of Supramolecular Fiber Organization (GO:1902905)	2/74	0.448687	0.622445	0	0	1.333546189868029	1.0687446673486838	HCK;TNXB
Regulation of Nervous System Development (GO:0051960)	1/29	0.450997	0.622445	0	0	1.7140130861504908	1.3648602172826456	LGI4
Neuropeptide Signaling Pathway (GO:0007218)	1/29	0.450997	0.622445	0	0	1.7140130861504908	1.3648602172826456	ECEL1
Nucleobase-Containing Compound Metabolic Process (GO:0006139)	1/29	0.450997	0.622445	0	0	1.7140130861504908	1.3648602172826456	OAS3
Phosphatidic Acid Metabolic Process (GO:0046473)	1/29	0.450997	0.622445	0	0	1.7140130861504908	1.3648602172826456	PLA2G6
Regulation of Type I Interferon-Mediated Signaling Pathway (GO:0060338)	1/29	0.450997	0.622445	0	0	1.7140130861504908	1.3648602172826456	OAS3
Connective Tissue Development (GO:0061448)	1/29	0.450997	0.622445	0	0	1.7140130861504908	1.3648602172826456	ZNF516
Positive Regulation of Bone Mineralization (GO:0030501)	1/29	0.450997	0.622445	0	0	1.7140130861504908	1.3648602172826456	WNT4
Dendrite Morphogenesis (GO:0048813)	1/29	0.450997	0.622445	0	0	1.7140130861504908	1.3648602172826456	EPHB1
Positive Regulation of Insulin Secretion (GO:0032024)	1/29	0.450997	0.622445	0	0	1.7140130861504908	1.3648602172826456	PLA2G6
Positive Regulation of Lymphocyte Differentiation (GO:0045621)	1/29	0.450997	0.622445	0	0	1.7140130861504908	1.3648602172826456	GAS6
Defense Response to Virus (GO:0051607)	3/121	0.451216	0.622445	0	0	1.220730117340287	0.971467656373528	OAS3;ZDHHC11;DDX60
Cell Surface Receptor Protein Tyrosine Kinase Signaling Pathway (GO:0007169)	5/216	0.453289	0.624682	0	0	1.1380836915389985	0.9004800645483976	HCK;SHC2;PDGFA;EPHB1;NGEF
Regulation of Protein Metabolic Process (GO:0051246)	2/75	0.455557	0.627183	0	0	1.3151734634965622	1.0340358608412503	DDX25;GSAP
O-glycan Processing (GO:0016266)	1/30	0.462245	0.631994	0	0	1.6547775730455383	1.276924559168747	GCNT1
Negative Regulation of Transport (GO:0051051)	1/30	0.462245	0.631994	0	0	1.6547775730455383	1.276924559168747	SYT12
Positive Regulation of Actin Filament Polymerization (GO:0030838)	1/30	0.462245	0.631994	0	0	1.6547775730455383	1.276924559168747	HCK
Positive Regulation of Biomineral Tissue Development (GO:0070169)	1/30	0.462245	0.631994	0	0	1.6547775730455383	1.276924559168747	WNT4
Positive Regulation of Cytokine-Mediated Signaling Pathway (GO:0001961)	1/30	0.462245	0.631994	0	0	1.6547775730455383	1.276924559168747	GAS6
Positive Regulation of Non-Canonical NF-kappaB Signal Transduction (GO:1901224)	1/30	0.462245	0.631994	0	0	1.6547775730455383	1.276924559168747	AGER
Negative Regulation of Biosynthetic Process (GO:0009890)	1/30	0.462245	0.631994	0	0	1.6547775730455383	1.276924559168747	ATP2B4
Positive Regulation of Cytokine Production (GO:0001819)	4/171	0.464249	0.634108	0	0	1.1499780362055811	0.8824167082594994	PLCG2;ARHGEF2;TICAM1;AGER
Regulation of Cell Growth (GO:0001558)	4/172	0.468731	0.639484	0	0	1.1430410001838573	0.8661114589953331	CREB3L4;HPN;LTBP4;RASGRP2
JNK Cascade (GO:0007254)	1/31	0.473264	0.639484	0	0	1.5994910941475826	1.1965808676189724	MAPK10
Regulation of Monoatomic Ion Transmembrane Transporter Activity (GO:0032412)	1/31	0.473264	0.639484	0	0	1.5994910941475826	1.1965808676189724	CACNG8
Neuron Projection Extension (GO:1990138)	1/31	0.473264	0.639484	0	0	1.5994910941475826	1.1965808676189724	ULK2
Regulation of Potassium Ion Transmembrane Transport (GO:1901379)	1/31	0.473264	0.639484	0	0	1.5994910941475826	1.1965808676189724	KCNIP1
Response to cAMP (GO:0051591)	1/31	0.473264	0.639484	0	0	1.5994910941475826	1.1965808676189724	IGFBP5
Positive Regulation of Epithelial Cell Migration (GO:0010634)	1/31	0.473264	0.639484	0	0	1.5994910941475826	1.1965808676189724	PLCG2
Positive Regulation of Ossification (GO:0045778)	1/31	0.473264	0.639484	0	0	1.5994910941475826	1.1965808676189724	WNT4
Heart Morphogenesis (GO:0003007)	1/31	0.473264	0.639484	0	0	1.5994910941475826	1.1965808676189724	CCM2L
Purine Nucleotide Metabolic Process (GO:0006163)	1/31	0.473264	0.639484	0	0	1.5994910941475826	1.1965808676189724	FMO4
Purine Ribonucleotide Biosynthetic Process (GO:0009152)	1/31	0.473264	0.639484	0	0	1.5994910941475826	1.1965808676189724	ADCY7
Cellular Response to Transforming Growth Factor Beta Stimulus (GO:0071560)	2/78	0.475868	0.642375	0	0	1.2629562411776567	0.9378911496594673	COL1A2;WNT4
Enzyme-Linked Receptor Protein Signaling Pathway (GO:0007167)	2/79	0.482536	0.64775	0	0	1.2464546947305568	0.9082923693460235	HCK;SHC2
Regulation of Glycolytic Process (GO:0006110)	1/32	0.484059	0.64775	0	0	1.5477714848559467	1.1229848160574034	MLXIPL
Activation of Protein Kinase Activity (GO:0032147)	1/32	0.484059	0.64775	0	0	1.5477714848559467	1.1229848160574034	GAS6
Regulation of Peptidyl-Serine Phosphorylation (GO:0033135)	1/32	0.484059	0.64775	0	0	1.5477714848559467	1.1229848160574034	IL11
Positive Regulation of Cell-Cell Adhesion (GO:0022409)	1/32	0.484059	0.64775	0	0	1.5477714848559467	1.1229848160574034	AGER
Unsaturated Fatty Acid Metabolic Process (GO:0033559)	1/32	0.484059	0.64775	0	0	1.5477714848559467	1.1229848160574034	PTGR1
Positive Regulation of Smooth Muscle Cell Proliferation (GO:0048661)	1/32	0.484059	0.64775	0	0	1.5477714848559467	1.1229848160574034	IGFBP5
Integrated Stress Response Signaling (GO:0140467)	1/32	0.484059	0.64775	0	0	1.5477714848559467	1.1229848160574034	CREB3L4
Regulation of DNA-templated Transcription Elongation (GO:0032784)	1/32	0.484059	0.64775	0	0	1.5477714848559467	1.1229848160574034	TCEA2
Positive Regulation of Cell Population Proliferation (GO:0008284)	7/321	0.485242	0.648706	0	0	1.070063694267516	0.7737718077012616	IL11;HCK;MLXIPL;TNXB;PDGFA;GAS6;NCCRP1
Cilium Organization (GO:0044782)	4/176	0.48652	0.649788	0	0	1.1160994881925115	0.8041248287934001	DNMBP;IFT140;OCRL;TTC17
Positive Regulation of Cellular Process (GO:0048522)	9/419	0.487949	0.651068	0	0	1.053658536585366	0.7560473607824848	IL11;HCK;MLXIPL;ADGRG1;TNXB;HPN;PDGFA;NCCRP1;NID1
Positive Regulation of Cellular Component Organization (GO:0051130)	2/80	0.489151	0.652045	0	0	1.2303762648590235	0.8798219606858201	CLIP3;AHNAK
Neuron Development (GO:0048666)	3/129	0.493276	0.654313	0	0	1.1424908424908424	0.8073835168935206	TNXB;LGI4;AGER
Cellular Response to Lipid (GO:0071396)	3/129	0.493276	0.654313	0	0	1.1424908424908424	0.8073835168935206	PLCG2;PDK3;TICAM1
Negative Regulation of Viral Genome Replication (GO:0045071)	1/33	0.494632	0.654313	0	0	1.4992843511450382	1.05540742903231	OAS3
Regulation of Smooth Muscle Cell Proliferation (GO:0048660)	1/33	0.494632	0.654313	0	0	1.4992843511450382	1.05540742903231	IGFBP5
Sterol Metabolic Process (GO:0016125)	1/33	0.494632	0.654313	0	0	1.4992843511450382	1.05540742903231	FAXDC2
Synaptic Vesicle Exocytosis (GO:0016079)	1/33	0.494632	0.654313	0	0	1.4992843511450382	1.05540742903231	SYT12
Proton Transmembrane Transport (GO:1902600)	1/33	0.494632	0.654313	0	0	1.4992843511450382	1.05540742903231	ATP6V0A4
Microtubule Polymerization (GO:0046785)	1/33	0.494632	0.654313	0	0	1.4992843511450382	1.05540742903231	TUBG2
Positive Regulation of Epithelial Cell Proliferation (GO:0050679)	2/81	0.495714	0.655118	0	0	1.2147048838449974	0.8524270956760057	STAT5A;HPN
Cellular Response to Cytokine Stimulus (GO:0071345)	4/180	0.504066	0.661649	0	0	1.0903825903825903	0.7469645112925519	STAT5A;HCK;ARHGEF2;GAS6
Regulation of Lipid Metabolic Process (GO:0019216)	1/34	0.50499	0.661649	0	0	1.453735831598427	0.9932164687422259	PLCG2
Non-Canonical Wnt Signaling Pathway (GO:0035567)	1/34	0.50499	0.661649	0	0	1.453735831598427	0.9932164687422259	WNT4
Nuclear Receptor-Mediated Steroid Hormone Signaling Pathway (GO:0030518)	1/34	0.50499	0.661649	0	0	1.453735831598427	0.9932164687422259	CALCOCO1
Nucleic Acid Catabolic Process (GO:0141188)	1/34	0.50499	0.661649	0	0	1.453735831598427	0.9932164687422259	DNASE1L1
Cellular Response to Radiation (GO:0071478)	1/34	0.50499	0.661649	0	0	1.453735831598427	0.9932164687422259	KDM4D
Positive Regulation of Gene Expression, Epigenetic (GO:0141137)	1/34	0.50499	0.661649	0	0	1.453735831598427	0.9932164687422259	CTCFL
Learning (GO:0007612)	1/34	0.50499	0.661649	0	0	1.453735831598427	0.9932164687422259	SYT12
Membrane Assembly (GO:0071709)	1/34	0.50499	0.661649	0	0	1.453735831598427	0.9932164687422259	TLCD2
Regulation of Apoptotic Process (GO:0042981)	11/523	0.505433	0.661649	0	0	1.0307384672619047	0.7033136838660582	CLIP3;HCK;TOX3;KLF11;ACTN3;CREB3L4;MAGED1;HPN;TNFRSF25;GAS6;FSTL1
Epithelium Development (GO:0060429)	2/83	0.508678	0.665268	0	0	1.184522964855021	0.800667511436683	GREB1L;WNT4
Cilium Assembly (GO:0060271)	4/182	0.512741	0.667412	0	0	1.0779575723395949	0.7200594902178095	DNMBP;IFT140;OCRL;GAS8
Regulation of Response to External Stimulus (GO:0032101)	2/84	0.515078	0.667412	0	0	1.1699841136342397	0.7762113699656331	HCK;AGER
DNA-templated DNA Replication Maintenance of Fidelity (GO:0045005)	1/35	0.515136	0.667412	0	0	1.4108666367310283	0.9358612670147799	EME1
Antimicrobial Humoral Response (GO:0019730)	1/35	0.515136	0.667412	0	0	1.4108666367310283	0.9358612670147799	PLA2G6
Peptidyl-Tyrosine Modification (GO:0018212)	1/35	0.515136	0.667412	0	0	1.4108666367310283	0.9358612670147799	HCK
Regulation of Tumor Necrosis Factor-Mediated Signaling Pathway (GO:0010803)	1/35	0.515136	0.667412	0	0	1.4108666367310283	0.9358612670147799	GAS6
Chloride Transmembrane Transport (GO:1902476)	1/35	0.515136	0.667412	0	0	1.4108666367310283	0.9358612670147799	GABRP
Sister Chromatid Segregation (GO:0000819)	1/35	0.515136	0.667412	0	0	1.4108666367310283	0.9358612670147799	TUBG2
Tight Junction Assembly (GO:0120192)	1/35	0.515136	0.667412	0	0	1.4108666367310283	0.9358612670147799	LNX1
Positive Regulation of Pattern Recognition Receptor Signaling Pathway (GO:0062208)	1/35	0.515136	0.667412	0	0	1.4108666367310283	0.9358612670147799	DDX60
Regulation of Cytokine-Mediated Signaling Pathway (GO:0001959)	1/36	0.525075	0.67461	0	0	1.3704471101417666	0.8828602846323917	GAS6
Regulation of Interleukin-1 Beta Production (GO:0032651)	1/36	0.525075	0.67461	0	0	1.3704471101417666	0.8828602846323917	SERPINB1
RNA Stabilization (GO:0043489)	1/36	0.525075	0.67461	0	0	1.3704471101417666	0.8828602846323917	MEIOC
Regulation of Metabolic Process (GO:0019222)	1/36	0.525075	0.67461	0	0	1.3704471101417666	0.8828602846323917	PDK3
Carboxylic Acid Transmembrane Transport (GO:1905039)	1/36	0.525075	0.67461	0	0	1.3704471101417666	0.8828602846323917	SLC27A1
Cellular Response to Ketone (GO:1901655)	1/36	0.525075	0.67461	0	0	1.3704471101417666	0.8828602846323917	GAS6
Positive Regulation of Epithelial to Mesenchymal Transition (GO:0010718)	1/36	0.525075	0.67461	0	0	1.3704471101417666	0.8828602846323917	TNXB
Positive Regulation of Osteoblast Differentiation (GO:0045669)	1/36	0.525075	0.67461	0	0	1.3704471101417666	0.8828602846323917	WNT4
Positive Regulation of Reactive Oxygen Species Metabolic Process (GO:2000379)	1/36	0.525075	0.67461	0	0	1.3704471101417666	0.8828602846323917	PLCG2
Transforming Growth Factor Beta Receptor Superfamily Signaling Pathway (GO:0141091)	2/87	0.533945	0.682057	0	0	1.1284201036736534	0.7080404133328381	GDF11;COL1A2
Regulation of Epithelial Cell Migration (GO:0010632)	1/37	0.534812	0.682057	0	0	1.3322731128074639	0.8337908510599007	PLCG2
Negative Regulation of mRNA Catabolic Process (GO:1902373)	1/37	0.534812	0.682057	0	0	1.3322731128074639	0.8337908510599007	MEIOC
Organelle Transport Along Microtubule (GO:0072384)	1/37	0.534812	0.682057	0	0	1.3322731128074639	0.8337908510599007	DYNC1I1
Response to Glucose (GO:0009749)	1/37	0.534812	0.682057	0	0	1.3322731128074639	0.8337908510599007	GAS6
Positive Regulation of Nervous System Development (GO:0051962)	1/37	0.534812	0.682057	0	0	1.3322731128074639	0.8337908510599007	EPHB1
Hexose Metabolic Process (GO:0019318)	1/37	0.534812	0.682057	0	0	1.3322731128074639	0.8337908510599007	GAA
Intracellular Glucose Homeostasis (GO:0001678)	1/37	0.534812	0.682057	0	0	1.3322731128074639	0.8337908510599007	GAS6
Regulation of Cellular Component Organization (GO:0051128)	3/138	0.538614	0.686275	0	0	1.0655555555555556	0.6593184390418924	CREB3L4;LTBP4;RASGRP2
Positive Regulation of Gene Expression (GO:0010628)	6/288	0.539224	0.686421	0	0	1.0199519827800314	0.629946111834104	CALCOCO1;HPN;PLCG2;GAS6;TICAM1;CTCFL
Regulation of Interferon-Beta Production (GO:0032648)	1/38	0.544349	0.687259	0	0	1.296162574788529	0.7882806520805324	OAS3
Negative Regulation of Proteasomal Protein Catabolic Process (GO:1901799)	1/38	0.544349	0.687259	0	0	1.296162574788529	0.7882806520805324	PRKCG
Regulation of Substrate Adhesion-Dependent Cell Spreading (GO:1900024)	1/38	0.544349	0.687259	0	0	1.296162574788529	0.7882806520805324	TRIOBP
Phosphatidylcholine Metabolic Process (GO:0046470)	1/38	0.544349	0.687259	0	0	1.296162574788529	0.7882806520805324	PLA2G6
Positive Regulation of Blood Vessel Endothelial Cell Migration (GO:0043536)	1/38	0.544349	0.687259	0	0	1.296162574788529	0.7882806520805324	STAT5A
Positive Regulation of Cell Cycle G1/S Phase Transition (GO:1902808)	1/38	0.544349	0.687259	0	0	1.296162574788529	0.7882806520805324	PLCG2
Protein Localization to Cilium (GO:0061512)	1/38	0.544349	0.687259	0	0	1.296162574788529	0.7882806520805324	IFT140
Regulation of Bone Mineralization (GO:0030500)	1/38	0.544349	0.687259	0	0	1.296162574788529	0.7882806520805324	WNT4
Regulation of Cellular Component Size (GO:0032535)	1/38	0.544349	0.687259	0	0	1.296162574788529	0.7882806520805324	DNM1
Regulation of Organelle Organization (GO:0033043)	2/89	0.546243	0.689022	0	0	1.1023032545030167	0.6665534631232751	SYT12;F11R
DNA Recombination (GO:0006310)	1/39	0.553691	0.695252	0	0	1.2619525914021696	0.7460006325381844	ERCC1
Regulation of Secretion by Cell (GO:1903530)	1/39	0.553691	0.695252	0	0	1.2619525914021696	0.7460006325381844	SCG5
Regulation of Type II Interferon Production (GO:0032649)	1/39	0.553691	0.695252	0	0	1.2619525914021696	0.7460006325381844	GAS6
Positive Regulation of Transport (GO:0051050)	1/39	0.553691	0.695252	0	0	1.2619525914021696	0.7460006325381844	CLIP3
Membrane Fission (GO:0090148)	1/39	0.553691	0.695252	0	0	1.2619525914021696	0.7460006325381844	DNM1
Nervous System Development (GO:0007399)	7/343	0.555643	0.696911	0	0	0.9982096354166666	0.5865774921506661	GDF11;SDK1;EMX1;NCAN;EPHB1;SDK2;KLK6
Regulation of DNA-templated Transcription (GO:0006355)	32/1583	0.556019	0.696911	0	0	0.9870241514342094	0.5793364432867734	L3MBTL1;CALCOCO1;MAGED1;ZNF518B;ONECUT1;ZBTB4;MLLT6;CREB3L4;ZNF83;ZKSCAN1;WNT4;HES4;STAT5A;ZNF100;KLF11;EMX1;ZNF681;ZFHX2;ZBTB10;ATP2B4;EBF4;CTCFL;TOX3;ERN2;MLXIPL;ZNF70;ZNF619;TEF;ZNF516;TCEA2;LHX5;GAS6
Blood Vessel Morphogenesis (GO:0048514)	1/40	0.562843	0.700393	0	0	1.2294969661381876	0.706659049162662	TNNI3
Regulation of Proteolysis (GO:0030162)	1/40	0.562843	0.700393	0	0	1.2294969661381876	0.706659049162662	GSAP
Cellular Response to Mechanical Stimulus (GO:0071260)	1/40	0.562843	0.700393	0	0	1.2294969661381876	0.706659049162662	F11R
Positive Regulation of Fat Cell Differentiation (GO:0045600)	1/40	0.562843	0.700393	0	0	1.2294969661381876	0.706659049162662	FNDC5
Epidermal Growth Factor Receptor Signaling Pathway (GO:0007173)	1/40	0.562843	0.700393	0	0	1.2294969661381876	0.706659049162662	REPS2
Transcription Initiation-Coupled Chromatin Remodeling (GO:0045815)	1/40	0.562843	0.700393	0	0	1.2294969661381876	0.706659049162662	CTCFL
Fatty Acid Oxidation (GO:0019395)	1/40	0.562843	0.700393	0	0	1.2294969661381876	0.706659049162662	ACAD10
Purine Ribonucleotide Metabolic Process (GO:0009150)	1/40	0.562843	0.700393	0	0	1.2294969661381876	0.706659049162662	SULT1C4
Negative Regulation of Catabolic Process (GO:0009895)	2/92	0.564262	0.701528	0	0	1.0653043848446146	0.6096064463709121	PRKCG;AGAP2
Regulation of Primary Metabolic Process (GO:0080090)	2/93	0.570153	0.704585	0	0	1.053513536272157	0.5919164750005895	AHNAK;PLCG2
Actin Polymerization or Depolymerization (GO:0008154)	1/41	0.571808	0.704585	0	0	1.1986641221374046	0.6699964636415192	TTC17
Neurogenesis (GO:0022008)	1/41	0.571808	0.704585	0	0	1.1986641221374046	0.6699964636415192	EPHB1
Carbohydrate Derivative Biosynthetic Process (GO:1901137)	1/41	0.571808	0.704585	0	0	1.1986641221374046	0.6699964636415192	GCNT1
Peptidyl-Tyrosine Phosphorylation (GO:0018108)	1/41	0.571808	0.704585	0	0	1.1986641221374046	0.6699964636415192	HCK
Replication Fork Processing (GO:0031297)	1/41	0.571808	0.704585	0	0	1.1986641221374046	0.6699964636415192	EME1
Gland Development (GO:0048732)	1/41	0.571808	0.704585	0	0	1.1986641221374046	0.6699964636415192	WNT4
Positive Regulation of Nucleocytoplasmic Transport (GO:0046824)	1/41	0.571808	0.704585	0	0	1.1986641221374046	0.6699964636415192	GAS6
Monoatomic Anion Transmembrane Transport (GO:0098656)	1/41	0.571808	0.704585	0	0	1.1986641221374046	0.6699964636415192	GABRP
Myeloid Cell Differentiation (GO:0030099)	1/41	0.571808	0.704585	0	0	1.1986641221374046	0.6699964636415192	IL11
Macroautophagy (GO:0016236)	3/146	0.576913	0.709613	0	0	1.00529854760624	0.5529784316839501	ATG16L2;ULK2;SPG11
Regulation of Cell Differentiation (GO:0045595)	3/146	0.576913	0.709613	0	0	1.00529854760624	0.5529784316839501	TNXB;ZFHX2;KLK6
Epithelial to Mesenchymal Transition (GO:0001837)	1/42	0.580589	0.712237	0	0	1.1693353193073917	0.6357815087363667	WNT4
Protein Secretion (GO:0009306)	1/42	0.580589	0.712237	0	0	1.1693353193073917	0.6357815087363667	OLFM2
Regulation of SMAD Protein Signal Transduction (GO:0060390)	1/42	0.580589	0.712237	0	0	1.1693353193073917	0.6357815087363667	GDF11
Positive Regulation of Cell Differentiation (GO:0045597)	4/200	0.58741	0.718409	0	0	0.977543140808447	0.520084784031022	TNXB;ARHGEF2;NID1;WNT4
Cellular Response to Alcohol (GO:0097306)	1/43	0.589191	0.718409	0	0	1.1414031261359505	0.6038072928066603	ADCY7
Sulfur Compound Biosynthetic Process (GO:0044272)	1/43	0.589191	0.718409	0	0	1.1414031261359505	0.6038072928066603	MAT1A
Fatty Acid Beta-Oxidation (GO:0006635)	1/43	0.589191	0.718409	0	0	1.1414031261359505	0.6038072928066603	ACAD10
Protein Polymerization (GO:0051258)	1/43	0.589191	0.718409	0	0	1.1414031261359505	0.6038072928066603	TTC17
Mitophagy (GO:0000423)	1/43	0.589191	0.718409	0	0	1.1414031261359505	0.6038072928066603	ULK2
Regulation of Cell Migration (GO:0030334)	7/354	0.589251	0.718409	0	0	0.9656992975504323	0.5107617364332477	SERPINB1;TNXB;IGFBP5;CREB3L4;PDGFA;FIGNL2;DPEP1
Central Nervous System Development (GO:0007417)	4/202	0.59529	0.725134	0	0	0.9675129675129676	0.5018548060397671	EMX1;ADGRG1;NCAN;KLK6
Regulation of Proteasomal Protein Catabolic Process (GO:0061136)	1/44	0.597618	0.726053	0	0	1.1147701047399254	0.5738883351430899	PRKCG
Regulation of Reactive Oxygen Species Metabolic Process (GO:2000377)	1/44	0.597618	0.726053	0	0	1.1147701047399254	0.5738883351430899	PDK3
Signal Transduction by P53 Class Mediator (GO:0072331)	1/44	0.597618	0.726053	0	0	1.1147701047399254	0.5738883351430899	MUC1
Positive Regulation of Metabolic Process (GO:0009893)	2/98	0.598744	0.726697	0	0	0.9982439335887612	0.5120202319294699	ZNF516;YBX2
Regulation of Autophagy (GO:0010506)	4/203	0.599197	0.726697	0	0	0.9625734851865505	0.4929960174206669	ULK2;SNX32;TICAM1;DEPP1
Phosphorylation (GO:0016310)	5/256	0.603648	0.730315	0	0	0.9536273510608728	0.4813573466011893	PRKCG;MAPK10;HCK;ERN2;GAS6
ATP Metabolic Process (GO:0046034)	1/45	0.605872	0.730315	0	0	1.0893476752255378	0.5458579424793409	ENO3
Negative Regulation of Neuron Projection Development (GO:0010977)	1/45	0.605872	0.730315	0	0	1.0893476752255378	0.5458579424793409	NGEF
Canonical Wnt Signaling Pathway (GO:0060070)	1/45	0.605872	0.730315	0	0	1.0893476752255378	0.5458579424793409	WNT4
Double-Strand Break Repair via Nonhomologous End Joining (GO:0006303)	1/45	0.605872	0.730315	0	0	1.0893476752255378	0.5458579424793409	ERCC1
Mesenchymal Cell Differentiation (GO:0048762)	1/45	0.605872	0.730315	0	0	1.0893476752255378	0.5458579424793409	WNT4
Mitotic Nuclear Division (GO:0140014)	1/45	0.605872	0.730315	0	0	1.0893476752255378	0.5458579424793409	TUBG2
Protein Transport (GO:0015031)	5/258	0.610547	0.733676	0	0	0.9459355945705794	0.46672495477020365	ARL11;OLFM2;CALCRL;SCG5;ARHGEF2
ERBB Signaling Pathway (GO:0038127)	1/46	0.613957	0.733676	0	0	1.0650551314673453	0.5195659562439251	REPS2
Negative Regulation of Innate Immune Response (GO:0045824)	1/46	0.613957	0.733676	0	0	1.0650551314673453	0.5195659562439251	OAS3
Regulation of Non-Canonical NF-kappaB Signal Transduction (GO:1901222)	1/46	0.613957	0.733676	0	0	1.0650551314673453	0.5195659562439251	AGER
Cell-Cell Junction Organization (GO:0045216)	1/46	0.613957	0.733676	0	0	1.0650551314673453	0.5195659562439251	TJP3
Cellular Response to Ionizing Radiation (GO:0071479)	1/46	0.613957	0.733676	0	0	1.0650551314673453	0.5195659562439251	KDM4D
Positive Regulation of MAP Kinase Activity (GO:0043406)	1/46	0.613957	0.733676	0	0	1.0650551314673453	0.5195659562439251	PDGFA
Dicarboxylic Acid Metabolic Process (GO:0043648)	1/46	0.613957	0.733676	0	0	1.0650551314673453	0.5195659562439251	LDHD
Endoplasmic Reticulum Organization (GO:0007029)	1/46	0.613957	0.733676	0	0	1.0650551314673453	0.5195659562439251	TRDN
mRNA Stabilization (GO:0048255)	1/46	0.613957	0.733676	0	0	1.0650551314673453	0.5195659562439251	MEIOC
Receptor-Mediated Endocytosis (GO:0006898)	2/101	0.615204	0.734532	0	0	0.967761910290646	0.47014083415791846	CALCRL;DNM1
Positive Regulation of Canonical NF-kappaB Signal Transduction (GO:0043123)	3/155	0.617553	0.736701	0	0	0.9450910931174089	0.4555254308268821	PLEKHG5;TRIM38;TICAM1
Regulation of Microtubule Polymerization (GO:0031113)	1/47	0.621877	0.736784	0	0	1.0418187852638565	0.49487681077486434	CLIP3
Neuron Migration (GO:0001764)	1/47	0.621877	0.736784	0	0	1.0418187852638565	0.49487681077486434	KIAA0319L
Regulation of Smoothened Signaling Pathway (GO:0008589)	1/47	0.621877	0.736784	0	0	1.0418187852638565	0.49487681077486434	GAS8
Regulation of Viral Genome Replication (GO:0045069)	1/47	0.621877	0.736784	0	0	1.0418187852638565	0.49487681077486434	OAS3
Endosome Organization (GO:0007032)	1/47	0.621877	0.736784	0	0	1.0418187852638565	0.49487681077486434	DNM1
Inorganic Anion Transmembrane Transport (GO:0098661)	1/47	0.621877	0.736784	0	0	1.0418187852638565	0.49487681077486434	GABRP
Memory (GO:0007613)	1/47	0.621877	0.736784	0	0	1.0418187852638565	0.49487681077486434	SYT12
Regulation of G Protein-Coupled Receptor Signaling Pathway (GO:0008277)	1/47	0.621877	0.736784	0	0	1.0418187852638565	0.49487681077486434	KLK6
Regulation of Canonical NF-kappaB Signal Transduction (GO:0043122)	4/210	0.625906	0.740923	0	0	0.9293398807961915	0.4354465099984788	PLEKHG5;PLCG2;TRIM38;TICAM1
Negative Regulation of Protein Ubiquitination (GO:0031397)	1/48	0.629636	0.743432	0	0	1.019571219749878	0.4716678548173007	PRKCG
Negative Regulation of Viral Process (GO:0048525)	1/48	0.629636	0.743432	0	0	1.019571219749878	0.4716678548173007	OAS3
Cell-Cell Junction Assembly (GO:0007043)	1/48	0.629636	0.743432	0	0	1.019571219749878	0.4716678548173007	LNX1
Protein Homooligomerization (GO:0051260)	2/105	0.63634	0.748576	0	0	0.9298813376483279	0.4203264846740283	MAT1A;DNM1
Amide Biosynthetic Process (GO:0043604)	1/49	0.637235	0.748576	0	0	0.9982506361323156	0.4498278945749597	CARNS1
Regulation of Synapse Assembly (GO:0051963)	1/49	0.637235	0.748576	0	0	0.9982506361323156	0.4498278945749597	EPHB1
Positive Regulation of Cell Junction Assembly (GO:1901890)	1/49	0.637235	0.748576	0	0	0.9982506361323156	0.4498278945749597	EPHB1
Embryonic Organ Development (GO:0048568)	1/49	0.637235	0.748576	0	0	0.9982506361323156	0.4498278945749597	PDGFA
Heterochromatin Formation (GO:0031507)	1/49	0.637235	0.748576	0	0	0.9982506361323156	0.4498278945749597	L3MBTL1
Synapse Organization (GO:0050808)	2/106	0.641481	0.752217	0	0	0.920866489832007	0.40884253062965675	SDK1;SDK2
Regulation of Signal Transduction (GO:0009966)	3/161	0.643144	0.752217	0	0	0.908763388510224	0.40111541209907065	IGFBP5;KCNIP1;MFNG
Regulation of RNA Biosynthetic Process (GO:2001141)	7/373	0.644171	0.752217	0	0	0.9141478825136612	0.40203461879713104	ZNF100;MLXIPL;MAGED1;ONECUT1;ZNF516;ZBTB4;MLLT6
Nucleotide-Excision Repair (GO:0006289)	1/50	0.64468	0.752217	0	0	0.9778002804175105	0.42925592727675943	ERCC1
Regulation of Signal Transduction by P53 Class Mediator (GO:1901796)	1/50	0.64468	0.752217	0	0	0.9778002804175105	0.42925592727675943	MLXIPL
Chloride Transport (GO:0006821)	1/50	0.64468	0.752217	0	0	0.9778002804175105	0.42925592727675943	GABRP
Positive Regulation of Cell-Substrate Adhesion (GO:0010811)	1/50	0.64468	0.752217	0	0	0.9778002804175105	0.42925592727675943	TRIOBP
Fatty Acid Catabolic Process (GO:0009062)	1/50	0.64468	0.752217	0	0	0.9778002804175105	0.42925592727675943	ACAD10
Regulation of Mitotic Cell Cycle (GO:0007346)	2/107	0.646564	0.753147	0	0	0.9120233534026637	0.3977177404448865	CUL9;L3MBTL1
Regulation of Protein Catabolic Process (GO:0042176)	2/107	0.646564	0.753147	0	0	0.9120233534026637	0.3977177404448865	PRKCG;AGAP2
Protein Localization to Membrane (GO:0072657)	3/162	0.647291	0.75336	0	0	0.9029753265602323	0.39275759664846105	MADCAM1;F11R;GAS6
Neuron Projection Development (GO:0031175)	3/163	0.651403	0.755001	0	0	0.8972596153846154	0.3845889693239609	TNXB;EPHB1;AGER
Regulation of Phosphorylation (GO:0042325)	1/51	0.651972	0.755001	0	0	0.9581679389312977	0.4098600354450776	KDM4D
Regulation of Type I Interferon Production (GO:0032479)	1/51	0.651972	0.755001	0	0	0.9581679389312977	0.4098600354450776	TICAM1
Cellular Response to Hormone Stimulus (GO:0032870)	1/51	0.651972	0.755001	0	0	0.9581679389312977	0.4098600354450776	BCAS3
Positive Regulation of Protein Serine/Threonine Kinase Activity (GO:0071902)	1/51	0.651972	0.755001	0	0	0.9581679389312977	0.4098600354450776	PDGFA
Regulation of MAP Kinase Activity (GO:0043405)	1/51	0.651972	0.755001	0	0	0.9581679389312977	0.4098600354450776	PDGFA
Regulation of GTPase Activity (GO:0043087)	2/109	0.65656	0.759679	0	0	0.8948329573530992	0.37649328105225927	RASGRP2;NGEF
Negative Regulation of Protein Modification by Small Protein Conjugation or Removal (GO:1903321)	1/52	0.659115	0.759936	0	0	0.9393054931896423	0.3915564198495793	PRKCG
Regulation of Telomere Maintenance (GO:0032204)	1/52	0.659115	0.759936	0	0	0.9393054931896423	0.3915564198495793	ERCC1
Positive Regulation of Binding (GO:0051099)	1/52	0.659115	0.759936	0	0	0.9393054931896423	0.3915564198495793	KDM4D
mRNA Export From Nucleus (GO:0006406)	1/52	0.659115	0.759936	0	0	0.9393054931896423	0.3915564198495793	DDX25
Endomembrane System Organization (GO:0010256)	3/165	0.659526	0.759936	0	0	0.886039886039886	0.36880008314318513	ATP8B3;TLCD2;DNM1
Protein Localization to Plasma Membrane (GO:0072659)	2/110	0.661473	0.761546	0	0	0.8864765148290052	0.36636884700049277	F11R;GAS6
Negative Regulation of Immune Response (GO:0050777)	1/53	0.666112	0.763081	0	0	0.9211685261303582	0.374268551145712	HCK
Cellular Response to Unfolded Protein (GO:0034620)	1/53	0.666112	0.763081	0	0	0.9211685261303582	0.374268551145712	CREB3L4
Sodium Ion Transport (GO:0006814)	1/53	0.666112	0.763081	0	0	0.9211685261303582	0.374268551145712	SLC24A1
Positive Regulation of Cytoskeleton Organization (GO:0051495)	1/53	0.666112	0.763081	0	0	0.9211685261303582	0.374268551145712	HCK
Positive Regulation of Telomere Maintenance (GO:0032206)	1/53	0.666112	0.763081	0	0	0.9211685261303582	0.374268551145712	ERCC1
Negative Regulation of Cell Adhesion (GO:0007162)	1/53	0.666112	0.763081	0	0	0.9211685261303582	0.374268551145712	MUC1
T Cell Receptor Signaling Pathway (GO:0050852)	1/54	0.672966	0.767758	0	0	0.9037159729223678	0.35792642331534985	PLCG2
Cell Junction Organization (GO:0034330)	1/54	0.672966	0.767758	0	0	0.9037159729223678	0.35792642331534985	TJP3
mRNA Transport (GO:0051028)	1/54	0.672966	0.767758	0	0	0.9037159729223678	0.35792642331534985	DDX25
Microtubule Cytoskeleton Organization Involved in Mitosis (GO:1902850)	1/54	0.672966	0.767758	0	0	0.9037159729223678	0.35792642331534985	TUBG2
Regulation of BMP Signaling Pathway (GO:0030510)	1/54	0.672966	0.767758	0	0	0.9037159729223678	0.35792642331534985	FSTL1
DNA-templated Transcription (GO:0006351)	3/169	0.67536	0.769174	0	0	0.8644114921223355	0.3392891682324186	CREB3L4;TCEA2;YBX2
Phosphate-Containing Compound Metabolic Process (GO:0006796)	2/113	0.675874	0.769174	0	0	0.8623105864485174	0.33780911121551077	PRKCG;OCRL
+ Reg of Phosphatidylinositol 3-Kinase/Prot Kinase B Signal Transduction (GO:0051897)	2/113	0.675874	0.769174	0	0	0.8623105864485174	0.33780911121551077	PDGFA;GAS6
Autophagy of Mitochondrion (GO:0000422)	1/55	0.67968	0.770341	0	0	0.8869098105739327	0.3424658963738898	ULK2
Response to Tumor Necrosis Factor (GO:0034612)	1/55	0.67968	0.770341	0	0	0.8869098105739327	0.3424658963738898	ARHGEF2
Vesicle Organization (GO:0016050)	1/55	0.67968	0.770341	0	0	0.8869098105739327	0.3424658963738898	DNM1
Positive Regulation of Protein Polymerization (GO:0032273)	1/55	0.67968	0.770341	0	0	0.8869098105739327	0.3424658963738898	HCK
Protein Targeting to Membrane (GO:0006612)	1/55	0.67968	0.770341	0	0	0.8869098105739327	0.3424658963738898	ZDHHC11
Protein Localization to Cell Periphery (GO:1990778)	2/114	0.680563	0.770711	0	0	0.8545429666119321	0.32885830028418206	F11R;GAS6
Positive Regulation of Endothelial Cell Proliferation (GO:0001938)	1/56	0.686256	0.774625	0	0	0.8707147814018042	0.3278281147544742	STAT5A
Post-Transcriptional Regulation of Gene Expression (GO:0010608)	1/56	0.686256	0.774625	0	0	0.8707147814018042	0.3278281147544742	DDX25
Regulation of Actin Filament Polymerization (GO:0030833)	1/56	0.686256	0.774625	0	0	0.8707147814018042	0.3278281147544742	HCK
Negative Regulation of Cellular Response to Growth Factor Stimulus (GO:0090288)	1/56	0.686256	0.774625	0	0	0.8707147814018042	0.3278281147544742	ATP2B4
Response to Endoplasmic Reticulum Stress (GO:0034976)	3/172	0.686877	0.774695	0	0	0.8488620846609012	0.3188321483624105	ERN2;CREB3L4;NCCRP1
Anterograde Trans-Synaptic Signaling (GO:0098916)	2/116	0.689775	0.776697	0	0	0.8394165490354238	0.31175117761602883	KCNIP1;SPG11
Protein Maturation (GO:0051604)	2/116	0.689775	0.776697	0	0	0.8394165490354238	0.31175117761602883	ECEL1;KLK6
Organophosphate Metabolic Process (GO:0019637)	1/57	0.692698	0.778091	0	0	0.8550981461286805	0.31395899225134827	OCRL
Lipid Biosynthetic Process (GO:0008610)	1/57	0.692698	0.778091	0	0	0.8550981461286805	0.31395899225134827	MLXIPL
Regulation of Notch Signaling Pathway (GO:0008593)	1/57	0.692698	0.778091	0	0	0.8550981461286805	0.31395899225134827	MFNG
Organelle Assembly (GO:0070925)	5/284	0.693633	0.77851	0	0	0.8559778833597288	0.3131273705886317	DNMBP;ATG16L2;IFT140;ULK2;OCRL
Cellular Response to Tumor Necrosis Factor (GO:0071356)	1/58	0.699008	0.783274	0	0	0.8400294629704032	0.30080875565659404	ARHGEF2
Monoatomic Cation Homeostasis (GO:0055080)	1/58	0.699008	0.783274	0	0	0.8400294629704032	0.30080875565659404	HEPH
RNA Biosynthetic Process (GO:0032774)	2/119	0.703183	0.785118	0	0	0.8176965648230016	0.2879422530557219	CREB3L4;TCEA2
Actin Filament Organization (GO:0007015)	2/119	0.703183	0.785118	0	0	0.8176965648230016	0.2879422530557219	NEBL;ARHGEF2
Brain Development (GO:0007420)	2/119	0.703183	0.785118	0	0	0.8176965648230016	0.2879422530557219	EMX1;ADGRG1
Regulation of Plasma Membrane Bounded Cell Projection Assembly (GO:0120032)	1/59	0.705189	0.785118	0	0	0.8254803895762043	0.28833153768725406	IFT140
Positive Regulation of Intracellular Protein Transport (GO:0090316)	1/59	0.705189	0.785118	0	0	0.8254803895762043	0.28833153768725406	GAS6
Glycoprotein Biosynthetic Process (GO:0009101)	1/59	0.705189	0.785118	0	0	0.8254803895762043	0.28833153768725406	GCNT1
Negative Regulation of Cell Cycle (GO:0045786)	1/59	0.705189	0.785118	0	0	0.8254803895762043	0.28833153768725406	CREB3L4
Negative Regulation of Cellular Component Organization (GO:0051129)	1/59	0.705189	0.785118	0	0	0.8254803895762043	0.28833153768725406	SYT12
RNA Export From Nucleus (GO:0006405)	1/60	0.711244	0.790588	0	0	0.8114245051106224	0.2764850149388406	DDX25
Regulation of Stress Fiber Assembly (GO:0051492)	1/60	0.711244	0.790588	0	0	0.8114245051106224	0.2764850149388406	F11R
Neuron Projection Morphogenesis (GO:0048812)	2/122	0.716107	0.792727	0	0	0.7970625798212005	0.26615929521029363	EPHB1;SPG11
Actomyosin Structure Organization (GO:0031032)	1/61	0.717174	0.792727	0	0	0.7978371501272264	0.2652300845973655	F11R
Regulation of Protein Binding (GO:0043393)	1/61	0.717174	0.792727	0	0	0.7978371501272264	0.2652300845973655	GAS8
Cellular Response to Molecule of Bacterial Origin (GO:0071219)	1/61	0.717174	0.792727	0	0	0.7978371501272264	0.2652300845973655	TICAM1
Positive Regulation of Growth (GO:0045927)	1/61	0.717174	0.792727	0	0	0.7978371501272264	0.2652300845973655	HPN
Positive Regulation of Inflammatory Response (GO:0050729)	1/61	0.717174	0.792727	0	0	0.7978371501272264	0.2652300845973655	PLCG2
Glucose Homeostasis (GO:0042593)	1/61	0.717174	0.792727	0	0	0.7978371501272264	0.2652300845973655	MLXIPL
Positive Regulation of TOR Signaling (GO:0032008)	1/62	0.722984	0.798511	0	0	0.7846952821924665	0.2545305746151433	GAS6
Peptidyl-Serine Phosphorylation (GO:0018105)	1/63	0.728674	0.802875	0	0	0.7719773454814085	0.2443529844568981	PDK3
Transforming Growth Factor Beta Receptor Signaling Pathway (GO:0007179)	1/63	0.728674	0.802875	0	0	0.7719773454814085	0.2443529844568981	COL1A2
+ Reg of Transmembrane Receptor Prot Serine/Threonine Kinase Sgnlng Pway (GO:0090100)	1/63	0.728674	0.802875	0	0	0.7719773454814085	0.2443529844568981	GDF11
Regulation of Translation (GO:0006417)	3/184	0.729895	0.80358	0	0	0.7918189545261368	0.24930836154949937	IGFBP5;DDX25;YBX2
Regulation of Endothelial Cell Migration (GO:0010594)	1/64	0.734248	0.80645	0	0	0.7596631527929237	0.2346662524626696	BCAS3
Peptidyl-Serine Modification (GO:0018209)	1/64	0.734248	0.80645	0	0	0.7596631527929237	0.2346662524626696	PDK3
Response to Ionizing Radiation (GO:0010212)	1/64	0.734248	0.80645	0	0	0.7596631527929237	0.2346662524626696	KDM4D
Negative Regulation of RNA Biosynthetic Process (GO:1902679)	6/354	0.734964	0.806597	0	0	0.8220850664162083	0.25314734479151546	L3MBTL1;ERN2;MLXIPL;GAS6;ZBTB4;WNT4
Regulation of Cell Cycle Process (GO:0010564)	2/127	0.736599	0.807751	0	0	0.7648735632183908	0.23383070322146152	CUL9;L3MBTL1
Antigen Receptor-Mediated Signaling Pathway (GO:0050851)	1/65	0.739708	0.807962	0	0	0.7477337786259542	0.22544154581448028	PLCG2
Organic Anion Transport (GO:0015711)	1/65	0.739708	0.807962	0	0	0.7477337786259542	0.22544154581448028	SLCO1A2
Cell Morphogenesis Involved in Neuron Differentiation (GO:0048667)	1/65	0.739708	0.807962	0	0	0.7477337786259542	0.22544154581448028	SPG11
Cellular Response to Hypoxia (GO:0071456)	1/65	0.739708	0.807962	0	0	0.7477337786259542	0.22544154581448028	PDK3
Negative Regulation of Angiogenesis (GO:0016525)	1/65	0.739708	0.807962	0	0	0.7477337786259542	0.22544154581448028	ATP2B4
Regulation of Transcription by RNA Polymerase II (GO:0006357)	30/1616	0.742792	0.810691	0	0	0.8943058629964983	0.265912305458955	CALCOCO1;MAGED1;ZNF518B;ONECUT1;ZBTB4;MLLT6;MUC1;CREB3L4;ZNF83;ZKSCAN1;HES4;STAT5A;IL11;BCAS3;KLF11;EMX1;ZNF681;ZFHX2;ZBTB10;ATP2B4;EBF4;CTCFL;TOX3;MLXIPL;ZNF70;ZNF619;TEF;TCEA2;LHX5;ARHGEF2
DNA Replication (GO:0006260)	1/66	0.745056	0.811883	0	0	0.7361714621256606	0.21665207218260993	RECQL5
Monoatomic Ion Transport (GO:0006811)	1/66	0.745056	0.811883	0	0	0.7361714621256606	0.21665207218260993	SLC24A1
Epithelial Cell Differentiation (GO:0030855)	1/67	0.750295	0.816307	0	0	0.7249595188526486	0.20827290932835218	FSTL1
Regulation of TOR Signaling (GO:0032006)	1/67	0.750295	0.816307	0	0	0.7249595188526486	0.20827290932835218	GAS6
Cellular Response to UV (GO:0034644)	1/68	0.755426	0.821244	0	0	0.7140822604534579	0.20028085127062062	ERCC1
Regulation of Endothelial Cell Proliferation (GO:0001936)	1/70	0.765376	0.829457	0	0	0.6932735922115278	0.18537298331589444	STAT5A
Regulation of Osteoblast Differentiation (GO:0045667)	1/70	0.765376	0.829457	0	0	0.6932735922115278	0.18537298331589444	WNT4
Signal Transduction in Response to DNA Damage (GO:0042770)	1/70	0.765376	0.829457	0	0	0.6932735922115278	0.18537298331589444	MUC1
Hemopoiesis (GO:0030097)	1/70	0.765376	0.829457	0	0	0.6932735922115278	0.18537298331589444	L3MBTL1
Regulation of Cilium Assembly (GO:1902017)	1/71	0.770199	0.834031	0	0	0.6833151581243184	0.17841815247212484	IFT140
Positive Regulation of Multicellular Organismal Process (GO:0051240)	4/256	0.772003	0.835332	0	0	0.7568793283078997	0.19585482607677976	TNXB;ZNF516;YBX2;GAS6
Negative Regulation of Inflammatory Response (GO:0050728)	1/72	0.774923	0.837836	0	0	0.6736372433071712	0.17177216571142714	HCK
Positive Regulation of Transcription by RNA Polymerase II (GO:0045944)	12/702	0.778468	0.840869	0	0	0.825359431837866	0.20669267744706976	STAT5A;IL11;TOX3;MLXIPL;BCAS3;CALCOCO1;MUC1;CREB3L4;ONECUT1;EBF4;ARHGEF2;CTCFL
RNA Catabolic Process (GO:0006401)	1/73	0.77955	0.840869	0	0	0.6642281594571671	0.16541854951258483	ERN2
Regulation of mRNA Stability (GO:0043488)	1/73	0.77955	0.840869	0	0	0.6642281594571671	0.16541854951258483	MEIOC
Negative Regulation of Gene Expression, Epigenetic (GO:0045814)	1/75	0.788522	0.847906	0	0	0.6461728904476997	0.1535277099411202	L3MBTL1
Axon Development (GO:0061564)	1/75	0.788522	0.847906	0	0	0.6461728904476997	0.1535277099411202	SPG11
Regulation of Transcription Elongation by RNA Polymerase II (GO:0034243)	1/75	0.788522	0.847906	0	0	0.6461728904476997	0.1535277099411202	RECQL5
Positive Regulation of Cellular Component Biogenesis (GO:0044089)	1/75	0.788522	0.847906	0	0	0.6461728904476997	0.1535277099411202	ERCC1
Regulation of Mitotic Cell Cycle Phase Transition (GO:1901990)	1/76	0.79287	0.85192	0	0	0.6375063613231552	0.14796248482644894	KLF11
Regulation of Inflammatory Response (GO:0050727)	2/143	0.793893	0.852358	0	0	0.6772098584277602	0.15630423875639496	HCK;AGER
Positive Regulation of Protein-Containing Complex Assembly (GO:0031334)	1/77	0.79713	0.85517	0	0	0.6290678987545198	0.1426334890831401	PLCG2
DNA Metabolic Process (GO:0006259)	4/267	0.79941	0.856952	0	0	0.7245768310407094	0.1622193951498461	RECQL5;ZNF83;ERCC1;DNASE1L1
Peptidyl-Lysine Modification (GO:0018205)	1/78	0.801302	0.857653	0	0	0.6208486170318231	0.13752877963561688	PLOD1
Positive Regulation of Neuron Projection Development (GO:0010976)	1/78	0.801302	0.857653	0	0	0.6208486170318231	0.13752877963561688	ATP1B2
Negative Regulation of Macromolecule Biosynthetic Process (GO:0010558)	2/146	0.803328	0.859158	0	0	0.6629416773094934	0.14517916096271563	ATP2B4;WNT4
Positive Regulation of Hydrolase Activity (GO:0051345)	1/79	0.805389	0.860697	0	0	0.6128400861225288	0.13263713187231488	RASGRP2
Regulation of Cell Motility (GO:2000145)	1/81	0.813313	0.868495	0	0	0.5974236641221374	0.12345141553885472	TNXB
Mitotic Spindle Organization (GO:0007052)	1/82	0.817153	0.871924	0	0	0.5900009424182452	0.11913805402469309	TUBG2
Protein Modification Process (GO:0036211)	7/450	0.818398	0.87258	0	0	0.7505026100451467	0.15040559040819348	PRKCG;MAPK10;HCK;ERN2;GAS6;TRIOBP;LOXL1
ERAD Pathway (GO:0036503)	1/83	0.820915	0.873247	0	0	0.5827592627071309	0.1149990861083295	NCCRP1
Positive Regulation of DNA Repair (GO:0045739)	1/83	0.820915	0.873247	0	0	0.5827592627071309	0.1149990861083295	PRKCG
Retrograde Transport, Endosome to Golgi (GO:0042147)	1/83	0.820915	0.873247	0	0	0.5827592627071309	0.1149990861083295	SNX32
DNA Repair (GO:0006281)	4/277	0.821969	0.873697	0	0	0.6974698403269832	0.1367408289620826	RECQL5;EME1;ZNF83;ERCC1
Negative Regulation of Gene Expression (GO:0010629)	4/279	0.826222	0.877544	0	0	0.6922850122850123	0.1321516725251257	IGFBP5;SYT12;ATP2B4;WNT4
Negative Regulation of Developmental Process (GO:0051093)	1/85	0.828209	0.878308	0	0	0.5687931661214104	0.10721153627647825	GAS6
Protein Catabolic Process (GO:0030163)	1/85	0.828209	0.878308	0	0	0.5687931661214104	0.10721153627647825	NCCRP1
Plasma Membrane Bounded Cell Projection Assembly (GO:0120031)	3/220	0.831433	0.880708	0	0	0.6585430698333924	0.12156966190644321	DNMBP;IFT140;OCRL
Positive Regulation of Cell Growth (GO:0030307)	1/86	0.831744	0.880708	0	0	0.5620565783565334	0.10354769865174633	HPN
Response to Lipopolysaccharide (GO:0032496)	1/87	0.835207	0.882351	0	0	0.5554766554233979	0.10002768346648044	TICAM1
Positive Regulation of Autophagy (GO:0010508)	1/87	0.835207	0.882351	0	0	0.5554766554233979	0.10002768346648044	TICAM1
Cytosolic Transport (GO:0016482)	1/87	0.835207	0.882351	0	0	0.5554766554233979	0.10002768346648044	SNX32
Negative Regulation of Programmed Cell Death (GO:0043069)	4/284	0.836488	0.883031	0	0	0.6796469939327082	0.12134593594646922	HCK;HPN;GAS6;FSTL1
Regulation of JNK Cascade (GO:0046328)	1/88	0.838599	0.884585	0	0	0.5490479950864262	0.09664487430521956	EPHB1
Positive Regulation of Double-Strand Break Repair (GO:2000781)	1/89	0.841921	0.885392	0	0	0.542765440666204	0.09339301323067882	KDM4D
rRNA Metabolic Process (GO:0016072)	1/89	0.841921	0.885392	0	0	0.542765440666204	0.09339301323067882	ERN2
Negative Regulation of Canonical Wnt Signaling Pathway (GO:0090090)	1/89	0.841921	0.885392	0	0	0.542765440666204	0.09339301323067882	TLE3
Negative Regulation of Cell Growth (GO:0030308)	1/89	0.841921	0.885392	0	0	0.542765440666204	0.09339301323067882	ULK2
Regulation of Phosphatidylinositol 3-Kinase/Protein Kinase B Signal Transduction (GO:0051896)	2/161	0.844974	0.886794	0	0	0.5996771006530278	0.10101514394188872	PDGFA;GAS6
Negative Regulation of Translation (GO:0017148)	1/90	0.845175	0.886794	0	0	0.536624067244189	0.09026617822385961	IGFBP5
Cellular Response to Insulin Stimulus (GO:0032869)	1/90	0.845175	0.886794	0	0	0.536624067244189	0.09026617822385961	SLC27A1
Positive Regulation of GTPase Activity (GO:0043547)	1/91	0.848363	0.889464	0	0	0.5306191687871077	0.0872587619122431	RASGRP2
Regulation of Macroautophagy (GO:0016241)	1/92	0.851485	0.891388	0	0	0.524746246120292	0.08436545218610118	SNX32
Regulation of G1/S Transition of Mitotic Cell Cycle (GO:2000045)	1/92	0.851485	0.891388	0	0	0.524746246120292	0.08436545218610118	KLF11
Protein Complex Oligomerization (GO:0051259)	1/93	0.854543	0.893914	0	0	0.5190009956853634	0.08158121426932215	DNM1
Intracellular Protein Transport (GO:0006886)	4/295	0.857304	0.895019	0	0	0.6533720760524884	0.10059454967296812	CLIP3;ARL11;SCG5;ARHGEF2
Circulatory System Development (GO:0072359)	1/94	0.857538	0.895019	0	0	0.5133792990232291	0.07890127347712365	TNNI3
Regulation of RNA Splicing (GO:0043484)	1/94	0.857538	0.895019	0	0	0.5133792990232291	0.07890127347712365	AHNAK
Regulation of Cytokine Production (GO:0001817)	1/95	0.860472	0.896729	0	0	0.5078772129283742	0.07632109987146395	SYT12
Positive Regulation of Cell Projection Organization (GO:0031346)	1/95	0.860472	0.896729	0	0	0.5078772129283742	0.07632109987146395	ATP1B2
MAPK Cascade (GO:0000165)	1/96	0.863345	0.897697	0	0	0.50249096022499	0.07383639342907744	MAPK10
Regulation of Transforming Growth Factor Beta Receptor Signaling Pathway (GO:0017015)	1/96	0.863345	0.897697	0	0	0.50249096022499	0.07383639342907744	LTBP4
Protein-Containing Complex Organization (GO:0043933)	1/96	0.863345	0.897697	0	0	0.50249096022499	0.07383639342907744	REPS2
Positive Regulation of RNA Biosynthetic Process (GO:1902680)	6/424	0.869496	0.903415	0	0	0.6805056504012064	0.09516315982256995	MLXIPL;CALCOCO1;CREB3L4;ZNF516;WNT4;CTCFL
Transcription Initiation at RNA Polymerase II Promoter (GO:0006367)	1/99	0.871617	0.90494	0	0	0.48699174326219036	0.06691524951924596	CTCFL
Negative Regulation of Response to External Stimulus (GO:0032102)	1/101	0.876852	0.909012	0	0	0.477175572519084	0.06270883649629301	FIGNL2
Intrinsic Apoptotic Signaling Pathway (GO:0097193)	1/101	0.876852	0.909012	0	0	0.477175572519084	0.06270883649629301	ERN2
Positive Regulation of Cell Motility (GO:2000147)	2/176	0.878476	0.910014	0	0	0.5473202096269872	0.07091466774793562	CREB3L4;PDGFA
Regulation of Protein Ubiquitination (GO:0031396)	1/102	0.87939	0.91028	0	0	0.4724132718615373	0.0607179145750035	PRKCG
Protein Localization (GO:0008104)	4/309	0.88051	0.910759	0	0	0.6226723210329768	0.07923725309440627	ARL11;GRIN3B;SCG5;ARHGEF2
Regulation of Protein-Containing Complex Assembly (GO:0043254)	1/103	0.881875	0.91149	0	0	0.46774434964825623	0.058797767484270506	HCK
Golgi Organization (GO:0007030)	1/106	0.889029	0.917746	0	0	0.4542711741185024	0.05343384973907974	ATP8B3
Intracellular Signaling Cassette (GO:0141124)	3/250	0.889253	0.917746	0	0	0.5771566490189972	0.06774299834348375	CREB3L4;PLCG2;PDE6B
Regulation of DNA Metabolic Process (GO:0051052)	1/108	0.893557	0.921501	0	0	0.44570878219305127	0.050162463646394546	PDGFA
Positive Regulation of Programmed Cell Death (GO:0043068)	2/189	0.901982	0.928895	0	0	0.5087385006249103	0.0524815822952402	CLIP3;KLF11
Mitotic Sister Chromatid Segregation (GO:0000070)	1/112	0.902068	0.928895	0	0	0.4295096623340898	0.044267730207823756	TUBG2
Negative Regulation of Wnt Signaling Pathway (GO:0030178)	1/113	0.904087	0.930283	0	0	0.42564067611777534	0.04291709650388257	TLE3
Nitrogen Compound Transport (GO:0071705)	1/116	0.9099	0.935569	0	0	0.4144374377696648	0.03913123587442957	CALCRL
Proteolysis (GO:0006508)	2/196	0.912817	0.937739	0	0	0.49010546273255123	0.04470744033237277	HPN;ECEL1
Positive Regulation of DNA-templated Transcription (GO:0045893)	14/931	0.913365	0.937739	0	0	0.7164536006621908	0.06492492817825102	STAT5A;IL11;BCAS3;CALCOCO1;ONECUT1;EBF4;CTCFL;TOX3;MLXIPL;MUC1;CREB3L4;ZNF516;ARHGEF2;WNT4
Protein Glycosylation (GO:0006486)	1/119	0.915362	0.939094	0	0	0.40380385560874626	0.03571044809724973	PLOD1
Cellular Response to Growth Factor Stimulus (GO:0071363)	1/120	0.917109	0.940189	0	0	0.40037847199948684	0.03464439412736984	WNT4
Protein Targeting (GO:0006605)	1/121	0.918819	0.941246	0	0	0.39701017811704836	0.03361318028737634	ZDHHC11
Protein Localization to Organelle (GO:0033365)	1/123	0.922135	0.943945	0	0	0.39043924414966835	0.0316502320007673	IFT140
Protein Polyubiquitination (GO:0000209)	2/204	0.923825	0.944976	0	0	0.4703918667728842	0.037270565915525626	WSB1;DZIP3
Negative Regulation of DNA-templated Transcription (GO:0045892)	10/738	0.940271	0.961089	0	0	0.6446814055509708	0.03970407146837873	L3MBTL1;ERN2;MLXIPL;KLF11;MUC1;MAGED1;ZBTB10;GAS6;ZBTB4;WNT4
Regulation of Neuron Projection Development (GO:0010975)	1/143	0.948708	0.968997	0	0	0.33491022470702075	0.017634565405850337	ATP1B2
Regulation of Angiogenesis (GO:0045765)	1/147	0.95282	0.97248	0	0	0.32563003241660565	0.015737581568522337	ATP2B4
DNA Damage Response (GO:0006974)	4/380	0.954376	0.972635	0	0	0.5021769489854596	0.023450543073979885	RECQL5;ZNF83;ERCC1;ZBTB4
Negative Regulation of Cellular Process (GO:0048523)	4/380	0.954376	0.972635	0	0	0.5021769489854596	0.023450543073979885	KLF11;ADGRG1;CREB3L4;GAS8
Chromatin Remodeling (GO:0006338)	2/235	0.955298	0.972858	0	0	0.4067880222978639	0.018603413319375994	KDM4D;ZNF83
Positive Regulation of Apoptotic Process (GO:0043065)	2/236	0.95607	0.97293	0	0	0.40501686478697974	0.018194966840904624	CLIP3;KLF11
Positive Regulation of Catabolic Process (GO:0009896)	1/153	0.95838	0.974564	0	0	0.31262555243069506	0.013290012839671687	TICAM1
Negative Regulation of Cell Differentiation (GO:0045596)	1/157	0.961719	0.977242	0	0	0.30451164611469955	0.01188597279745389	HPN
Protein Ubiquitination (GO:0016567)	3/327	0.965427	0.98029	0	0	0.43725071225071227	0.015384746456281606	CUL9;WSB1;DZIP3
Gene Expression (GO:0010467)	3/330	0.967028	0.981038	0	0	0.4331333803810868	0.014522084259704823	CREB3L4;DDX25;KLK6
Positive Regulation of Protein Metabolic Process (GO:0051247)	1/165	0.967618	0.981038	0	0	0.28947123440700057	0.009528892189414806	AGER
Transcription by RNA Polymerase II (GO:0006366)	1/166	0.968288	0.981038	0	0	0.2876937312051816	0.00927108041835086	YBX2
Regulation of Canonical Wnt Signaling Pathway (GO:0060828)	1/171	0.971439	0.983115	0	0	0.27911989223170186	0.008087998805210892	TLE3
Macromolecule Biosynthetic Process (GO:0009059)	1/172	0.972031	0.983115	0	0	0.27746529172804785	0.007871104605551045	GCNT1
Apoptotic Process (GO:0006915)	1/174	0.973178	0.983115	0	0	0.27421347570930593	0.00745547703437731	TNFRSF25
Protein Stabilization (GO:0050821)	1/174	0.973178	0.983115	0	0	0.27421347570930593	0.00745547703437731	ATP1B2
Chromatin Organization (GO:0006325)	2/266	0.974123	0.983353	0	0	0.35812144432834087	0.009389225898729349	L3MBTL1;KDM4D
Regulation of Cell Cycle (GO:0051726)	2/269	0.975472	0.983997	0	0	0.3540115086027523	0.008791575005431634	L3MBTL1;CREB3L4
Proteasome-Mediated Ubiquitin-Dependent Protein Catabolic Process (GO:0043161)	2/280	0.979861	0.987706	0	0	0.33970065327048704	0.006910967429169138	FBXL20;NCCRP1
Positive Regulation of Developmental Process (GO:0051094)	1/190	0.980817	0.98795	0	0	0.2506765216688881	0.004855385603261154	TNXB
Modification-Dependent Protein Catabolic Process (GO:0019941)	1/193	0.981987	0.98841	0	0	0.24670006361323155	0.00448439833791584	LNX1
Negative Regulation of Transcription by RNA Polymerase II (GO:0000122)	5/525	0.98433	0.990049	0	0	0.45028324388789503	0.007111862219035693	MLXIPL;KLF11;MAGED1;ZBTB10;ZBTB4
Negative Regulation of Signal Transduction (GO:0009968)	1/209	0.987124	0.992138	0	0	0.22742953611274222	0.002947503852067175	IGFBP5
Negative Regulation of Intracellular Signal Transduction (GO:1902532)	1/234	0.992386	0.996703	0	0	0.20261769812927957	0.0015487225291021295	MLXIPL
Protein-Containing Complex Assembly (GO:0065003)	1/258	0.995406	0.998337	0	0	0.18333976891317907	8.442569187577339E-4	REPS2
Organelle Organization (GO:0006996)	2/361	0.995454	0.998337	0	0	0.2613261614318189	0.0011906421854467753	ATP8B3;TTC17
Protein Modification by Small Protein Conjugation (GO:0032446)	1/285	0.9974	0.999565	0	0	0.1655467154069455	4.309644949284593E-4	CUL9
Proteasomal Protein Catabolic Process (GO:0010498)	1/310	0.998467	0.999658	0	0	0.1518441661108229	2.3302863475288448E-4	NCCRP1
Protein Metabolic Process (GO:0019538)	2/449	0.999146	0.999658	0	0	0.2083708332261908	1.7800315641869447E-4	HPN;KLK6
Ubiquitin-Dependent Protein Catabolic Process (GO:0006511)	1/381	0.999658	0.999658	0	0	0.12276014463640016	4.199676306622105E-5	LNX1

## Sheet: GOCC_Upregulated_in_both
Term	Overlap	P-value	Adjusted P-value	Old P-value	Old Adjusted P-value	Odds Ratio	Combined Score	Genes
Collagen-Containing Extracellular Matrix (GO:0062023)	14/228	0.000251235	0.0238297	0	0	3.25474	26.9789	SERPINB1;TNXB;COL22A1;FIBCD1;LTBP4;PLOD1;NID1;NID2;LOXL1;ICAM1;COL1A2;COL8A2;MXRA7;CRELD1
Endoplasmic Reticulum Lumen (GO:0005788)	13/206	0.000319773	0.0238297	0	0	3.34336	26.907	IGFBP5;COL22A1;PDGFA;FSTL1;TRDN;COL1A2;COL8A2;MXRA8;HRC;ARSG;ARSD;GAS6;WNT4
Golgi Lumen (GO:0005796)	6/49	0.00046122	0.0238297	0	0	6.81875	52.3791	MUC1;NCAN;PDGFA;GAS6;MUC4;WNT4
Ionotropic Glutamate Receptor Complex (GO:0008328)	4/24	0.00131394	0.0509151	0	0	9.71583	64.4619	CACNG8;GRIN3B;OLFM2;GRIK3
Lamellar Body (GO:0042599)	2/6	0.00591502	0.15535	0	0	24.1341	123.814	ABCA3;KLK6
Postsynaptic Density Membrane (GO:0098839)	4/36	0.00601355	0.15535	0	0	6.0666	31.023	CACNG8;GRIN3B;GRIK3;ATP2B4
Basement Membrane (GO:0005604)	4/40	0.00875575	0.178924	0	0	5.39082	25.5419	COL22A1;COL8A2;NID1;NID2
Voltage-Gated Calcium Channel Complex (GO:0005891)	3/22	0.0097578	0.178924	0	0	7.6415	35.3778	CACNG8;CACNA2D2;CACNA1F
Postsynaptic Specialization Membrane (GO:0099634)	4/42	0.0103891	0.178924	0	0	5.10628	23.3204	CACNG8;GRIN3B;GRIK3;ATP2B4
Intracellular Organelle Lumen (GO:0070013)	22/695	0.027785	0.430668	0	0	1.61806	5.79793	IGFBP5;NCAN;COL22A1;PDGFA;ACADSB;FSTL1;ACSF2;DHTKD1;MUC1;COL1A2;LDHD;COL8A2;MXRA8;HRC;PDK3;ARSG;ARSD;GAS6;NAT8L;ACAD10;MUC4;WNT4
Alpha-Ketoacid Dehydrogenase Complex (GO:0045240)	2/14	0.0322247	0.454075	0	0	8.03959	27.6162	LDHD;DHTKD1
AMPA Glutamate Receptor Complex (GO:0032281)	2/16	0.0413761	0.534442	0	0	6.88998	21.9449	CACNG8;OLFM2
Calcium Channel Complex (GO:0034704)	3/42	0.0540709	0.536678	0	0	3.71686	10.8438	CACNG8;CACNA2D2;CACNA1F
Cation-Transporting ATPase Complex (GO:0090533)	2/19	0.0566596	0.536678	0	0	5.67275	16.2847	ATP6V0A4;ATP1B2
Apicolateral Plasma Membrane (GO:0016327)	1/3	0.0600883	0.536678	0	0	24.0458	67.6154	LNX1
Vesicle (GO:0031982)	7/172	0.0632512	0.536678	0	0	2.06106	5.68984	MUC1;AHNAK;SYT12;PLCG2;ARHGEF2;MUC4;DYNC1I1
Polymeric Cytoskeletal Fiber (GO:0099513)	8/209	0.0654257	0.536678	0	0	1.93558	5.27801	HCK;ACTN3;KATNAL2;KRT7;TUBG2;ARHGEF2;GAS8;DNM1
Postsynaptic Density (GO:0014069)	6/140	0.0675652	0.536678	0	0	2.17225	5.85349	GRIN3B;CACNG8;SYT12;IQSEC3;GRIK3;ATP2B4
NMDA Selective Glutamate Receptor Complex (GO:0017146)	1/4	0.0793074	0.536678	0	0	16.0293	40.6249	GRIN3B
Astrocyte End-Foot (GO:0097450)	1/4	0.0793074	0.536678	0	0	16.0293	40.6249	ATP1B2
Sodium:Potassium-Exchanging ATPase Complex (GO:0005890)	1/4	0.0793074	0.536678	0	0	16.0293	40.6249	ATP1B2
Golgi Stack (GO:0005795)	2/24	0.0856199	0.536678	0	0	4.38175	10.7696	GCNT1;OCRL
Potassium Channel Complex (GO:0034705)	3/52	0.0899719	0.536678	0	0	2.95597	7.11873	KCNIP1;ABCC8;GRIK3
Perineuronal Net (GO:0072534)	1/5	0.098135	0.536678	0	0	12.021	27.9057	NCAN
Pyruvate Dehydrogenase Complex (GO:0045254)	1/5	0.098135	0.536678	0	0	12.021	27.9057	LDHD
Intermediate Filament Cytoskeleton (GO:0045111)	3/56	0.106512	0.536678	0	0	2.732	6.11832	BCAS3;KRT7;DDX60
9+0 Non-Motile Cilium (GO:0097731)	1/6	0.116579	0.536678	0	0	9.61603	20.6666	C1ORF115
Inhibitory Synapse (GO:0060077)	1/6	0.116579	0.536678	0	0	9.61603	20.6666	SYT12
Intracellular Vesicle (GO:0097708)	1/6	0.116579	0.536678	0	0	9.61603	20.6666	PLCG2
Neuron to Neuron Synapse (GO:0098984)	1/6	0.116579	0.536678	0	0	9.61603	20.6666	ATP1B2
Perisynaptic Extracellular Matrix (GO:0098966)	1/6	0.116579	0.536678	0	0	9.61603	20.6666	NCAN
Chromatoid Body (GO:0033391)	1/6	0.116579	0.536678	0	0	9.61603	20.6666	DDX25
Dendrite Cytoplasm (GO:0032839)	1/6	0.116579	0.536678	0	0	9.61603	20.6666	GRIK3
Bicellular Tight Junction (GO:0005923)	3/59	0.119635	0.536678	0	0	2.58503	5.48882	LNX1;F11R;TJP3
Cytoplasmic Side of Plasma Membrane (GO:0009898)	4/95	0.129952	0.536678	0	0	2.1233	4.33278	HCK;KCNIP1;MCF2L;ESYT2
Neurotransmitter Receptor Complex (GO:0098878)	1/7	0.134647	0.536678	0	0	8.01272	16.0663	GRIN3B
Oxoglutarate Dehydrogenase Complex (GO:0045252)	1/7	0.134647	0.536678	0	0	8.01272	16.0663	LDHD
Cell-Cell Junction (GO:0005911)	8/249	0.138784	0.536678	0	0	1.60911	3.17773	KIRREL2;DNMBP;AHNAK;NPHS1;PLEKHG5;HPN;PLEKHG4B;F11R
Sperm Flagellum (GO:0036126)	2/33	0.1457	0.536678	0	0	3.1074	5.9855	ATP2B4;GAS8
Junctional Sarcoplasmic Reticulum Membrane (GO:0014701)	1/8	0.152347	0.536678	0	0	6.8675	12.9218	TRDN
Keratin Filament (GO:0045095)	1/8	0.152347	0.536678	0	0	6.8675	12.9218	KRT7
Neuron Projection Cytoplasm (GO:0120111)	1/8	0.152347	0.536678	0	0	6.8675	12.9218	GRIK3
Astrocyte Projection (GO:0097449)	1/8	0.152347	0.536678	0	0	6.8675	12.9218	ATP1B2
Pseudopodium (GO:0031143)	1/8	0.152347	0.536678	0	0	6.8675	12.9218	ACTN3
Chromosome (GO:0005694)	5/139	0.155927	0.537082	0	0	1.80319	3.351	L3MBTL1;SYCE2;EMX1;RECQL5;CTCFL
Sarcoplasmic Reticulum (GO:0016529)	2/36	0.167267	0.54593	0	0	2.83254	5.06505	HRC;TRDN
Microfibril (GO:0001527)	1/9	0.169687	0.54593	0	0	6.00859	10.658	LTBP4
Early Phagosome (GO:0032009)	1/9	0.169687	0.54593	0	0	6.00859	10.658	SYT12
Tight Junction (GO:0070160)	3/71	0.177262	0.54593	0	0	2.12681	3.67965	LNX1;F11R;TJP3
Platelet Alpha Granule Lumen (GO:0031093)	2/38	0.181932	0.54593	0	0	2.67476	4.55811	PDGFA;GAS6
Endocytic Vesicle (GO:0030139)	5/148	0.186348	0.54593	0	0	1.68849	2.83689	CACNG8;SYT12;PLEKHG5;DNM1;WNT4
GABA-A Receptor Complex (GO:1902711)	1/10	0.186673	0.54593	0	0	5.34054	8.96356	GABRP
beta-catenin-TCF Complex (GO:1990907)	1/10	0.186673	0.54593	0	0	5.34054	8.96356	TLE3
9+2 Motile Cilium (GO:0097729)	2/40	0.196777	0.564824	0	0	2.53358	4.11879	ATP2B4;GAS8
Proton-Transporting V-type ATPase Complex (GO:0033176)	1/11	0.203313	0.566892	0	0	4.80611	7.65618	ATP6V0A4
Membrane Raft (GO:0045121)	4/114	0.204813	0.566892	0	0	1.75388	2.78105	CLIP3;AHNAK;PLCG2;ATP2B4
Tertiary Granule Membrane (GO:0070821)	2/42	0.211765	0.575852	0	0	2.40651	3.73558	GAA;ATP11A
Microtubule (GO:0005874)	5/157	0.218721	0.584512	0	0	1.58736	2.41273	KATNAL2;TUBG2;ARHGEF2;GAS8;DNM1
Apical Junction Complex (GO:0043296)	3/80	0.224526	0.589856	0	0	1.87687	2.80361	LNX1;F11R;TJP3
Axon (GO:0030424)	5/161	0.233639	0.598544	0	0	1.54616	2.24809	ROBO3;SYT12;PLEKHG5;GRIK3;SPG11
Glial Cell Projection (GO:0097386)	1/13	0.235582	0.598544	0	0	4.00445	5.78923	ATP1B2
trans-Golgi Network (GO:0005802)	6/205	0.242882	0.598544	0	0	1.4551	2.05922	CLIP3;ATP8B3;SYT12;GCNT1;GSAP;OCRL
Cytoskeleton (GO:0005856)	13/509	0.243279	0.598544	0	0	1.26918	1.79404	BCAS3;AHNAK;KLHL14;KRT7;OCRL;TUBG2;PLA2G6;DDX60;TRIOBP;TTC17;TTLL6;KATNAL2;ARHGEF2
Cytoplasmic Dynein Complex (GO:0005868)	1/14	0.251224	0.608434	0	0	3.69612	5.10586	DYNC1I1
Caveola (GO:0005901)	2/48	0.257237	0.613411	0	0	2.09162	2.83991	HCK;ATP2B4
SCF Ubiquitin Ligase Complex (GO:0019005)	2/51	0.280072	0.614673	0	0	1.96309	2.49845	FBXL20;NCCRP1
Microtubule Cytoskeleton (GO:0015630)	8/303	0.280555	0.614673	0	0	1.30882	1.66349	TTLL6;KATNAL2;OCRL;TUBG2;ARHGEF2;PLA2G6;GAS8;DNM1
Myofibril (GO:0030016)	1/16	0.28156	0.614673	0	0	3.2028	4.05926	TNNI3
Brush Border Membrane (GO:0031526)	1/16	0.28156	0.614673	0	0	3.2028	4.05926	ATP6V0A4
Sodium Channel Complex (GO:0034706)	1/16	0.28156	0.614673	0	0	3.2028	4.05926	GRIK3
Vacuolar Proton-Transporting V-type ATPase Complex (GO:0016471)	1/16	0.28156	0.614673	0	0	3.2028	4.05926	ATP6V0A4
Recycling Endosome (GO:0055037)	4/134	0.293666	0.632197	0	0	1.48168	1.81552	CLIP3;SYT12;ATP11A;DYNC1I1
Plasma Membrane Raft (GO:0044853)	2/55	0.310424	0.643274	0	0	1.81436	2.12246	HCK;ATP2B4
GABA-ergic Synapse (GO:0098982)	1/18	0.310671	0.643274	0	0	2.82555	3.30313	ATP2B4
Platelet Alpha Granule (GO:0031091)	2/56	0.317976	0.643274	0	0	1.78062	2.04019	PDGFA;GAS6
Non-Motile Cilium (GO:0097730)	1/19	0.324782	0.643274	0	0	2.66836	3.00084	C1ORF115
Dendrite Membrane (GO:0032590)	1/19	0.324782	0.643274	0	0	2.66836	3.00084	ATP2B4
Excitatory Synapse (GO:0060076)	1/19	0.324782	0.643274	0	0	2.66836	3.00084	SYT12
Lytic Vacuole (GO:0000323)	5/185	0.327862	0.643274	0	0	1.33742	1.49145	HCK;CALCRL;SYT12;GAA;ARSG
Exocytic Vesicle (GO:0070382)	1/20	0.338606	0.65605	0	0	2.52772	2.73731	SYT12
Lysosome (GO:0005764)	10/418	0.351231	0.671795	0	0	1.18131	1.23602	HCK;CALCRL;AHNAK;SYT12;NCAN;GAA;ATP6V0A4;ARSG;ATP11A;SPG11
Actin Filament (GO:0005884)	2/61	0.355401	0.671795	0	0	1.62907	1.68528	HCK;ACTN3
Lysosomal Lumen (GO:0043202)	2/62	0.362804	0.674276	0	0	1.60179	1.62404	NCAN;GAA
Secretory Vesicle (GO:0099503)	1/22	0.365414	0.674276	0	0	2.28662	2.302	SYT12
Sarcoplasmic Reticulum Membrane (GO:0033017)	1/23	0.378409	0.69004	0	0	2.18251	2.12092	TRDN
Cell Projection Membrane (GO:0031253)	2/65	0.384813	0.693559	0	0	1.52515	1.45651	ATP6V0A4;ATP1B2
Supramolecular Fiber (GO:0099512)	1/24	0.391139	0.696857	0	0	2.08745	1.95948	LTBP4
Dendrite (GO:0030425)	5/206	0.413082	0.714725	0	0	1.19567	1.0571	PRKCG;SYT12;GRIK3;EPHB1;SPG11
Aggresome (GO:0016235)	1/26	0.415825	0.714725	0	0	1.92015	1.68492	KLHL14
Autophagosome (GO:0005776)	2/70	0.420734	0.714725	0	0	1.41244	1.22283	ATG16L2;ULK2
Asymmetric Synapse (GO:0032279)	3/116	0.424224	0.714725	0	0	1.27526	1.09352	CACNG8;SYT12;IQSEC3
Endocytic Vesicle Membrane (GO:0030666)	3/116	0.424224	0.714725	0	0	1.27526	1.09352	CACNG8;ATP6V0A4;WNT4
Monoatomic Ion Channel Complex (GO:0034702)	1/28	0.439514	0.732523	0	0	1.77764	1.46137	GRIN3B
Neuron Projection (GO:0043005)	9/404	0.444451	0.732871	0	0	1.09502	0.887966	PRKCG;ROBO3;KLHL14;SYT12;PLEKHG5;GRIK3;OCRL;EPHB1;SPG11
Phagocytic Vesicle (GO:0045335)	2/76	0.462377	0.754405	0	0	1.2973	1.0007	SYT12;ATP6V0A4
Synaptic Membrane (GO:0097060)	1/31	0.473264	0.764125	0	0	1.59949	1.19658	ATP2B4
Intermediate Filament (GO:0005882)	1/32	0.484059	0.765603	0	0	1.54777	1.12298	KRT7
Golgi Cisterna (GO:0031985)	1/32	0.484059	0.765603	0	0	1.54777	1.12298	GCNT1
Extrinsic Component of Cytoplasmic Side of Plasma Membrane (GO:0031234)	1/33	0.494632	0.76668	0	0	1.49928	1.05541	MCF2L
Ficolin-1-Rich Granule Membrane (GO:0101003)	1/33	0.494632	0.76668	0	0	1.49928	1.05541	GAA
Secretory Granule Membrane (GO:0030667)	4/186	0.52988	0.794127	0	0	1.05393	0.669355	ABCA3;GAA;ATP11A;CUZD1
Actin Cytoskeleton (GO:0015629)	6/286	0.53238	0.794127	0	0	1.0274	0.647674	HCK;ACTN3;AHNAK;KLHL14;TRIOBP;TTC17
Microvillus (GO:0005902)	1/37	0.534812	0.794127	0	0	1.33227	0.833791	PDGFA
Golgi-associated Vesicle (GO:0005798)	1/38	0.544349	0.794127	0	0	1.29616	0.788281	OCRL
Specific Granule Lumen (GO:0035580)	1/38	0.544349	0.794127	0	0	1.29616	0.788281	DNASE1L1
Cell-Cell Contact Zone (GO:0044291)	1/39	0.553691	0.794127	0	0	1.26195	0.746001	AHNAK
Focal Adhesion (GO:0005925)	7/345	0.561843	0.794127	0	0	0.992141	0.572003	HCK;KLF11;ACTN3;AHNAK;ARHGEF2;TRIOBP;ICAM1
Phagocytic Vesicle Membrane (GO:0030670)	1/40	0.562843	0.794127	0	0	1.2295	0.706659	ATP6V0A4
Cell-Substrate Junction (GO:0030055)	7/351	0.580207	0.794127	0	0	0.97436	0.530412	HCK;KLF11;ACTN3;AHNAK;ARHGEF2;TRIOBP;ICAM1
Early Endosome Membrane (GO:0031901)	2/95	0.581763	0.794127	0	0	1.03069	0.558318	CLIP3;EPHB1
Mitochondrial Matrix (GO:0005759)	7/352	0.583232	0.794127	0	0	0.971456	0.52378	LDHD;PDK3;NAT8L;ACAD10;ACADSB;ACSF2;DHTKD1
Nuclear Membrane (GO:0031965)	4/199	0.583436	0.794127	0	0	0.982635	0.529463	MLXIPL;CREB3L4;HPN;KLK6
Motile Cilium (GO:0031514)	1/43	0.589191	0.794127	0	0	1.1414	0.603807	GAS8
Azurophil Granule Membrane (GO:0035577)	1/43	0.589191	0.794127	0	0	1.1414	0.603807	GAA
Cortical Actin Cytoskeleton (GO:0030864)	1/43	0.589191	0.794127	0	0	1.1414	0.603807	ACTN3
Vacuolar Membrane (GO:0005774)	1/45	0.605872	0.80856	0	0	1.08935	0.545858	ATP6V0A4
Tertiary Granule (GO:0070820)	2/101	0.615204	0.80856	0	0	0.967762	0.470141	GAA;ATP11A
Cytoplasmic Vesicle Membrane (GO:0030659)	6/312	0.617658	0.80856	0	0	0.938125	0.452008	CACNG8;ABCA3;ATP6V0A4;ZDHHC11;TICAM1;WNT4
Lytic Vacuole Membrane (GO:0098852)	5/261	0.620765	0.80856	0	0	0.934623	0.445631	AHNAK;GAA;ATP6V0A4;ATP11A;SPG11
Voltage-Gated Potassium Channel Complex (GO:0008076)	1/48	0.629636	0.813279	0	0	1.01957	0.471668	KCNIP1
Specific Granule (GO:0042581)	2/105	0.63634	0.815147	0	0	0.929881	0.420326	ATP11A;DNASE1L1
Secretory Granule Lumen (GO:0034774)	4/218	0.655021	0.832199	0	0	0.894021	0.378249	SERPINB1;PDGFA;GAS6;DNASE1L1
Condensed Chromosome (GO:0000793)	1/54	0.672966	0.837447	0	0	0.903716	0.357926	L3MBTL1
Cortical Cytoskeleton (GO:0030863)	1/54	0.672966	0.837447	0	0	0.903716	0.357926	ACTN3
cullin-RING Ubiquitin Ligase Complex (GO:0031461)	3/169	0.67536	0.837447	0	0	0.864411	0.339289	CUL9;FBXL20;NCCRP1
Vacuolar Lumen (GO:0005775)	2/115	0.685196	0.8429	0	0	0.846913	0.320175	NCAN;GAA
Cilium (GO:0005929)	5/285	0.696574	0.850149	0	0	0.852852	0.308375	TTLL6;IFT140;ATP2B4;OCRL;GAS8
Specific Granule Membrane (GO:0035579)	1/59	0.705189	0.85394	0	0	0.82548	0.288332	ATP11A
Actin-Based Cell Projection (GO:0098858)	1/61	0.717174	0.855092	0	0	0.797837	0.26523	PDGFA
Recycling Endosome Membrane (GO:0055038)	1/61	0.717174	0.855092	0	0	0.797837	0.26523	CLIP3
Basolateral Plasma Membrane (GO:0016323)	2/128	0.740543	0.876215	0	0	0.758742	0.227904	HEPH;SLCO1A2
P-body (GO:0000932)	1/70	0.765376	0.8871	0	0	0.693274	0.185373	MEX3A
Lysosomal Membrane (GO:0005765)	5/312	0.768665	0.8871	0	0	0.776141	0.204203	AHNAK;GAA;ATP6V0A4;ATP11A;SPG11
Endosome Membrane (GO:0010008)	5/313	0.771066	0.8871	0	0	0.773558	0.20111	CLIP3;ATP6V0A4;ZDHHC11;TICAM1;EPHB1
Early Endosome (GO:0005769)	4/258	0.777194	0.8871	0	0	0.750798	0.18925	CLIP3;OCRL;TICAM1;EPHB1
Clathrin-Coated Vesicle (GO:0030136)	1/73	0.77955	0.8871	0	0	0.664228	0.165419	OCRL
Coated Vesicle (GO:0030135)	1/74	0.784082	0.8871	0	0	0.655077	0.159342	OCRL
Cytoplasmic Stress Granule (GO:0010494)	1/79	0.805389	0.904603	0	0	0.61284	0.132637	DDX25
Glutamatergic Synapse (GO:0098978)	1/87	0.835207	0.928449	0	0	0.555477	0.100028	ATP2B4
Cytoplasmic Vesicle Lumen (GO:0060205)	1/88	0.838599	0.928449	0	0	0.549048	0.0966449	SERPINB1
trans-Golgi Network Membrane (GO:0032588)	1/90	0.845175	0.929093	0	0	0.536624	0.0902662	CLIP3
Peroxisome (GO:0005777)	1/109	0.895751	0.970629	0	0	0.441547	0.048611	DEPP1
Azurophil Granule (GO:0042582)	1/114	0.906065	0.970629	0	0	0.42184	0.0416119	GAA
Bounding Membrane of Organelle (GO:0098588)	10/693	0.906857	0.970629	0	0	0.689761	0.0674386	CACNG8;CREB3L4;GCNT1;PDGFA;ATP6V0A4;ZDHHC11;TICAM1;HS6ST2;WNT4;TRDN
Golgi Membrane (GO:0000139)	5/395	0.910314	0.970629	0	0	0.606838	0.057022	CREB3L4;GCNT1;PDGFA;ZDHHC11;HS6ST2
Spindle (GO:0005819)	2/197	0.91427	0.970629	0	0	0.487553	0.043699	KATNAL2;TUBG2
Endoplasmic Reticulum Membrane (GO:0005789)	9/667	0.933138	0.982473	0	0	0.64318	0.0445093	SLC27A1;CREB3L4;FAXDC2;HPN;ESYT2;PLOD1;CLCC1;FMO4;TRDN
Ficolin-1-Rich Granule (GO:0101002)	1/134	0.938103	0.982473	0	0	0.357832	0.0228637	GAA
Intracellular Membraneless Organelle (GO:0043232)	14/1059	0.973715	0.9999	0	0	0.62181	0.0165628	L3MBTL1;EMX1;TUBG2;CTCFL;SELENBP1;SYCE2;RECQL5;DNMBP;STAG3;KATNAL2;PDK3;ARHGEF2;KIAA0319L;SPG11
Nucleolus (GO:0005730)	8/693	0.975302	0.9999	0	0	0.545791	0.0136492	L3MBTL1;SELENBP1;EMX1;DNMBP;STAG3;PDK3;KIAA0319L;SPG11
Nuclear Lumen (GO:0031981)	8/701	0.977591	0.9999	0	0	0.539128	0.0122189	L3MBTL1;SELENBP1;EMX1;DNMBP;STAG3;PDK3;KIAA0319L;SPG11
Mitochondrial Inner Membrane (GO:0005743)	1/350	0.999342	0.9999	0	0	0.134003	8.8252e-05	LDHD
Mitochondrial Membrane (GO:0031966)	2/505	0.999711	0.9999	0	0	0.184319	5.33256e-05	LDHD;NAT8L
Intracellular Membrane-Bounded Organelle (GO:0043231)	62/4284	0.999797	0.9999	0	0	0.61224	0.000124442	CALCOCO1;ONECUT1;YBX2;CREB3L4;ZNF83;MEIOC;MEIOB;CLCC1;TLE3;BCAS3;KLF11;EMX1;ZNF681;GAA;KRT7;OCRL;TUBG2;ATP11A;CLIP3;HCK;TOX3;MN1;CLIP2;OLFM2;OAS3;ZNF516;PADI3;GAS8;DNASE1L1;L3MBTL1;TNXB;AHNAK;MAGED1;DDX25;AGAP2;ZBTB4;AGER;DEPP1;MLLT6;RECQL5;LDHD;PLEKHG4B;PLCG2;DYNC1I1;HES4;STAT5A;ZFHX2;KDM4D;ABCA3;ZBTB10;ATP2B4;BTBD8;CTCFL;MAPK10;MLXIPL;ZNF70;ZNF619;STAG3;TEF;TCEA2;LHX5;TJP3
Nucleus (GO:0005634)	51/3754	0.9999	0.9999	0	0	0.578125	5.79607e-05	CALCOCO1;ONECUT1;YBX2;CREB3L4;ZNF83;MEIOC;MEIOB;TLE3;BCAS3;KLF11;EMX1;ZNF681;KRT7;OCRL;TUBG2;CLIP3;TOX3;MN1;CLIP2;OLFM2;ZNF516;PADI3;DNASE1L1;L3MBTL1;AHNAK;MAGED1;DDX25;AGAP2;ZBTB4;AGER;MLLT6;RECQL5;LDHD;PLEKHG4B;DYNC1I1;HES4;STAT5A;ZFHX2;KDM4D;ZBTB10;BTBD8;CTCFL;MAPK10;MLXIPL;ZNF70;ZNF619;STAG3;TEF;TCEA2;LHX5;TJP3

## Sheet: GOMF_Upregulated_in_both
Term	Overlap	P-value	Adjusted P-value	Old P-value	Old Adjusted P-value	Odds Ratio	Combined Score	Genes
Calcium Ion Binding (GO:0005509)	11/189	0.00175809	0.442351	0	0	3.0467273051542714	19.326999094777843	KCNIP1;SYT12;C1R;PITPNM3;HRC;LTBP4;ATP2B4;ESYT2;TNNI3;FKBP9;RASGRP2
Guanyl-Nucleotide Exchange Factor Activity (GO:0005085)	10/183	0.00440781	0.442351	0	0	2.8396810527999268	15.40349877973909	PLEKHG4;DNMBP;ARHGEF25;MCF2L;PLEKHG5;PLEKHG4B;RGL3;ARHGEF2;RASGRP2;NGEF
Calcium Channel Activity (GO:0005262)	5/64	0.00982675	0.442351	0	0	4.120023649980292	19.045415716449753	SLC24A1;GRIN3B;CACNG8;CACNA2D2;CACNA1F
Transmitter-Gated Monoatomic Ion Channel Activity (GO:0022824)	3/24	0.0124461	0.442351	0	0	6.912637362637363	30.321230956666735	GABRP;GRIN3B;GRIK3
Platelet-Derived Growth Factor Binding (GO:0048407)	2/9	0.0136324	0.442351	0	0	13.787629994526545	59.22205171453918	COL1A2;PDGFA
Voltage-Gated Calcium Channel Activity (GO:0005245)	3/26	0.0155173	0.442351	0	0	6.310535117056856	26.28843420182226	CACNG8;CACNA2D2;CACNA1F
Long-Chain Fatty acid-CoA Ligase Activity (GO:0004467)	2/10	0.0168127	0.442351	0	0	12.063218390804598	49.285702028613535	SLC27A1;ACSF2
Arylsulfatase Activity (GO:0004065)	2/10	0.0168127	0.442351	0	0	12.063218390804598	49.285702028613535	ARSG;ARSD
Glutamate-Gated Receptor Activity (GO:0004970)	2/11	0.0202747	0.442351	0	0	10.722009365687526	41.798493919016906	GRIN3B;GRIK3
CCR1 Chemokine Receptor Binding (GO:0031726)	1/1	0.0204429	0.442351	0	0	Infinity	Infinity	CREB3L4
Aryl Sulfotransferase Activity (GO:0004062)	1/1	0.0204429	0.442351	0	0	Infinity	Infinity	SULT1C4
Glutamate Receptor Activity (GO:0008066)	2/12	0.0240055	0.442351	0	0	9.649042145593869	35.98584249294519	GRIN3B;GRIK3
Sulfuric Ester Hydrolase Activity (GO:0008484)	2/12	0.0240055	0.442351	0	0	9.649042145593869	35.98584249294519	ARSG;ARSD
Protein Tyrosine Kinase Binding (GO:1990782)	4/59	0.0323315	0.442351	0	0	3.5232011232011233	12.09061156040918	SHC2;PITPNM3;PLCG2;GAS6
Neurotransmitter Receptor Activity Involved in Regulation of Postsynaptic Membrane Potential (GO:0099529)	2/15	0.0366895	0.442351	0	0	7.420571765399352	24.526947440729803	GRIN3B;GRIK3
Lactate Dehydrogenase Activity (GO:0004457)	1/2	0.0404696	0.442351	0	0	48.095419847328245	154.25188826825976	LDHD
Serine-Type Endopeptidase Activity (GO:0004252)	4/65	0.0438016	0.442351	0	0	3.1751376669409455	9.932102948572973	C1R;C1RL;HPN;KLK6
Microtubule Plus-End Binding (GO:0051010)	2/17	0.0462736	0.442351	0	0	6.430140485312899	19.760998201069714	CLIP3;CLIP2
Metal Ion Binding (GO:0046872)	12/348	0.0542312	0.442351	0	0	1.7453044963005122	5.086689444641049	ERN2;KCNIP1;SYT12;C1R;PITPNM3;HRC;LTBP4;ATP2B4;ESYT2;TNNI3;FKBP9;RASGRP2
ATP-gated Ion Channel Activity (GO:0035381)	1/3	0.0600883	0.442351	0	0	24.045801526717558	67.61535525319093	P2RX2
Nitrite Reductase Activity (GO:0098809)	1/3	0.0600883	0.442351	0	0	24.045801526717558	67.61535525319093	MB
Nucleotide Receptor Activity (GO:0016502)	1/3	0.0600883	0.442351	0	0	24.045801526717558	67.61535525319093	P2RX2
Extracellularly ATP-gated Monoatomic Cation Channel Activity (GO:0004931)	1/3	0.0600883	0.442351	0	0	24.045801526717558	67.61535525319093	P2RX2
Transmitter-Gated Monoatomic Ion Channel Activity Involved in Regulation of Postsynaptic Membrane Potential (GO:1904315)	2/20	0.0621281	0.442351	0	0	5.3571732652192425	14.885211160842454	GRIN3B;GRIK3
Serine-Type Peptidase Activity (GO:0008236)	4/73	0.0622055	0.442351	0	0	2.80521515304124	7.790957065258887	C1R;C1RL;HPN;KLK6
Phospholipase Activity (GO:0004620)	3/46	0.0674342	0.442351	0	0	3.370035778175313	9.087649092423757	PITPNM3;PLCG2;PLA2G6
GTPase Regulator Activity (GO:0030695)	12/361	0.0675339	0.442351	0	0	1.6785123117843812	4.523801195311867	PLEKHG4;DNMBP;ARHGEF25;MCF2L;PLEKHG5;PLEKHG4B;AGAP2;RGL3;OCRL;ARHGEF2;RASGRP2;NGEF
Ligand-Gated Monoatomic Ion Channel Activity (GO:0015276)	2/21	0.0677674	0.442351	0	0	5.074813470457753	13.659741956027286	GRIN3B;P2RX2
Voltage-Gated Monoatomic Cation Channel Activity (GO:0022843)	3/47	0.070989	0.442351	0	0	3.293181818181818	8.711226752321615	CACNG8;CACNA2D2;CACNA1F
Receptor Tyrosine Kinase Binding (GO:0030971)	3/47	0.070989	0.442351	0	0	3.293181818181818	8.711226752321615	SHC2;PITPNM3;GAS6
Receptor Ligand Activity (GO:0048018)	6/142	0.0713103	0.442351	0	0	2.139963378347448	5.6510312103269955	IL11;GDF11;IGFBP5;PDGFA;GAS6;WNT4
RNA Polymerase II Transcription Regulatory Region Sequence-Specific DNA Binding (GO:0000977)	23/818	0.0747987	0.442351	0	0	1.4232756813417191	3.6904901016516214	STAT5A;ZNF100;KLF11;EMX1;ZNF681;CALCOCO1;ZFHX2;ONECUT1;ZBTB10;EBF4;ZBTB4;CTCFL;MLXIPL;MUC1;ZNF70;ZNF619;TEF;CREB3L4;ZNF83;ZNF516;LHX5;ZKSCAN1;HES4
Ferroxidase Activity (GO:0004322)	1/4	0.0793074	0.442351	0	0	16.029262086513995	40.62494083641583	HEPH
Four-Way Junction Helicase Activity (GO:0009378)	1/4	0.0793074	0.442351	0	0	16.029262086513995	40.62494083641583	RECQL5
Tubulin-Glutamic Acid Ligase Activity (GO:0070740)	1/4	0.0793074	0.442351	0	0	16.029262086513995	40.62494083641583	TTLL6
Inositol-1,4,5-Trisphosphate 5-Phosphatase Activity (GO:0052658)	1/4	0.0793074	0.442351	0	0	16.029262086513995	40.62494083641583	OCRL
L-amino-acid N-acetyltransferase Activity (GO:0140085)	1/4	0.0793074	0.442351	0	0	16.029262086513995	40.62494083641583	NAT8L
NMDA Glutamate Receptor Activity (GO:0004972)	1/4	0.0793074	0.442351	0	0	16.029262086513995	40.62494083641583	GRIN3B
Oxidoreductase Activity, Acting on Metal Ions, Oxygen as Acceptor (GO:0016724)	1/4	0.0793074	0.442351	0	0	16.029262086513995	40.62494083641583	HEPH
Oxidoreductase, Paired Donors, W Incorp or Reduction of O2, Another Compound as One Donor, and Incorp of O (GO:0016716)	1/4	0.0793074	0.442351	0	0	16.029262086513995	40.62494083641583	FAXDC2
Protein Phosphatase 2B Binding (GO:0030346)	1/4	0.0793074	0.442351	0	0	16.029262086513995	40.62494083641583	ATP2B4
Single-Stranded DNA 3'-5' DNA Exonuclease Activity (GO:0008310)	1/4	0.0793074	0.442351	0	0	16.029262086513995	40.62494083641583	MEIOB
Cytokine Activity (GO:0005125)	3/50	0.0821432	0.442351	0	0	3.0822422258592472	7.703421750638279	IL11;GDF11;WNT4
Calcium Ion Transmembrane Transporter Activity (GO:0015085)	3/52	0.0899719	0.442351	0	0	2.95596546310832	7.118727907601932	SLC24A1;GRIN3B;ATP2B4
Monocarboxylic Acid Transmembrane Transporter Activity (GO:0008028)	2/25	0.0918535	0.442351	0	0	4.190904547726137	10.006035995257056	SLC27A1;SLCO1A2
1-Alkyl-2-Acetylglycerophosphocholine Esterase Activity (GO:0003847)	1/5	0.098135	0.442351	0	0	12.020992366412214	27.90566473096447	PLA2G6
G Protein-Coupled Glutamate Receptor Binding (GO:0035256)	1/5	0.098135	0.442351	0	0	12.020992366412214	27.90566473096447	NECAB2
Alpha-Glucosidase Activity (GO:0090599)	1/5	0.098135	0.442351	0	0	12.020992366412214	27.90566473096447	GAA
Bile Acid Transmembrane Transporter Activity (GO:0015125)	1/5	0.098135	0.442351	0	0	12.020992366412214	27.90566473096447	SLCO1A2
Phosphatidylinositol Phosphate Phosphatase Activity (GO:0052866)	1/5	0.098135	0.442351	0	0	12.020992366412214	27.90566473096447	OCRL
Purinergic Nucleotide Receptor Activity (GO:0001614)	1/5	0.098135	0.442351	0	0	12.020992366412214	27.90566473096447	P2RX2
Protein Serine/Threonine/Tyrosine Kinase Activity (GO:0004712)	2/27	0.104696	0.442351	0	0	3.8550191570881225	8.699591917156965	PRKCG;MAPK10
Sodium-Independent Organic Anion Transmembrane Transporter Activity (GO:0015347)	1/6	0.116579	0.442351	0	0	9.616030534351145	20.66663660617363	SLCO1A2
CCR Chemokine Receptor Binding (GO:0048020)	1/6	0.116579	0.442351	0	0	9.616030534351145	20.66663660617363	CREB3L4
Tumor Necrosis Factor Receptor Activity (GO:0005031)	1/6	0.116579	0.442351	0	0	9.616030534351145	20.66663660617363	TNFRSF25
Hydrolase Activity, Acting on Carbon-Nitrogen (But Not Peptide) Bonds, in Linear Amidines (GO:0016813)	1/6	0.116579	0.442351	0	0	9.616030534351145	20.66663660617363	PADI3
Insulin-Like Growth Factor II Binding (GO:0031995)	1/6	0.116579	0.442351	0	0	9.616030534351145	20.66663660617363	IGFBP5
GPI Anchor Binding (GO:0034235)	1/6	0.116579	0.442351	0	0	9.616030534351145	20.66663660617363	DPEP1
P-type Calcium Transporter Activity (GO:0005388)	1/6	0.116579	0.442351	0	0	9.616030534351145	20.66663660617363	ATP2B4
Oxidoreductase Activity, Acting on a Sulfur Group of Donors, Oxygen as Acceptor (GO:0016670)	1/6	0.116579	0.442351	0	0	9.616030534351145	20.66663660617363	SELENBP1
Oxidoreductase Activity, Acting on the CH-CH Group of Donors, With a Flavin as Acceptor (GO:0052890)	1/6	0.116579	0.442351	0	0	9.616030534351145	20.66663660617363	ACADSB
Oxidoreductase Activity, Acting on the Aldehyde or Oxo Group of Donors, Disulfide as Acceptor (GO:0016624)	1/6	0.116579	0.442351	0	0	9.616030534351145	20.66663660617363	DHTKD1
Phosphatidylinositol Phosphate 4-Phosphatase Activity (GO:0034596)	1/6	0.116579	0.442351	0	0	9.616030534351145	20.66663660617363	OCRL
Phosphatidylinositol-4,5-Bisphosphate 5-Phosphatase Activity (GO:0004439)	1/6	0.116579	0.442351	0	0	9.616030534351145	20.66663660617363	OCRL
Calcium-Independent Phospholipase A2 Activity (GO:0047499)	1/6	0.116579	0.442351	0	0	9.616030534351145	20.66663660617363	PLA2G6
Cell-Matrix Adhesion Mediator Activity (GO:0098634)	1/6	0.116579	0.442351	0	0	9.616030534351145	20.66663660617363	MADCAM1
Cis-Regulatory Region Sequence-Specific DNA Binding (GO:0000987)	19/692	0.117173	0.442351	0	0	1.3802340876428032	2.9593702640231845	STAT5A;ZNF100;KLF11;EMX1;ZNF681;CALCOCO1;ZFHX2;ONECUT1;EBF4;ZBTB4;CTCFL;MLXIPL;MUC1;TEF;CREB3L4;ZNF83;ZNF516;ZKSCAN1;HES4
RNA Polymerase II Cis-Regulatory Region Sequence-Specific DNA Binding (GO:0000978)	19/694	0.119521	0.442351	0	0	1.375913782635094	2.9228080056582697	STAT5A;ZNF100;KLF11;EMX1;ZNF681;CALCOCO1;ZFHX2;ONECUT1;EBF4;ZBTB4;CTCFL;MLXIPL;MUC1;TEF;CREB3L4;ZNF83;ZNF516;ZKSCAN1;HES4
Phosphatidylinositol Binding (GO:0035091)	4/93	0.122852	0.442351	0	0	2.171359160123205	4.552856189266478	BCAS3;MCF2L;DPEP1;ESYT2
Acetylglucosaminyltransferase Activity (GO:0008375)	2/30	0.124786	0.442351	0	0	3.441160372194855	7.161586019867043	MFNG;GCNT1
Single-Stranded DNA Exodeoxyribonuclease Activity (GO:0008297)	1/7	0.134647	0.442351	0	0	8.012722646310433	16.0662844182027	MEIOB
Solute:Potassium Antiporter Activity (GO:0022821)	1/7	0.134647	0.442351	0	0	8.012722646310433	16.0662844182027	SLC24A1
Glycerophospholipid Flippase Activity (GO:0140333)	1/7	0.134647	0.442351	0	0	8.012722646310433	16.0662844182027	ATP11A
DNA Endonuclease Activity, Producing 3'-Phosphomonoesters (GO:0016889)	1/7	0.134647	0.442351	0	0	8.012722646310433	16.0662844182027	EME1
Inositol-Polyphosphate 5-Phosphatase Activity (GO:0004445)	1/7	0.134647	0.442351	0	0	8.012722646310433	16.0662844182027	OCRL
cAMP Response Element Binding Protein Binding (GO:0008140)	1/7	0.134647	0.442351	0	0	8.012722646310433	16.0662844182027	CREB3L4
Death Receptor Activity (GO:0005035)	1/7	0.134647	0.442351	0	0	8.012722646310433	16.0662844182027	TNFRSF25
Dipeptidase Activity (GO:0016805)	1/7	0.134647	0.442351	0	0	8.012722646310433	16.0662844182027	DPEP1
Phosphotyrosine Residue Binding (GO:0001784)	2/32	0.138648	0.442351	0	0	3.2112388250319284	6.344820294546316	HCK;PLCG2
ATPase Binding (GO:0051117)	3/64	0.142732	0.442351	0	0	2.3721941992433795	4.618163465294906	HRC;ATP6V0A4;ATP1B2
Ligand-Gated Monoatomic Ion Channel Activity Involved in Regulation of Presynaptic Membrane Potential (GO:0099507)	1/8	0.152347	0.442351	0	0	6.867502726281352	12.921840321066483	GRIN3B
Myosin II Binding (GO:0045159)	1/8	0.152347	0.442351	0	0	6.867502726281352	12.921840321066483	TRIOBP
acyl-CoA Dehydrogenase Activity (GO:0003995)	1/8	0.152347	0.442351	0	0	6.867502726281352	12.921840321066483	ACADSB
Phosphatidylinositol Transfer Activity (GO:0008526)	1/8	0.152347	0.442351	0	0	6.867502726281352	12.921840321066483	PITPNM3
Phosphatidylinositol-4,5-Bisphosphate Phosphatase Activity (GO:0106019)	1/8	0.152347	0.442351	0	0	6.867502726281352	12.921840321066483	OCRL
Calcium-Dependent Protein Serine/Threonine Kinase Activity (GO:0009931)	1/8	0.152347	0.442351	0	0	6.867502726281352	12.921840321066483	PRKCG
Calcium Channel Regulator Activity (GO:0005246)	2/35	0.160015	0.442351	0	0	2.918611401370022	5.348314456033305	CACNG8;TNNI3
Single-Stranded DNA Endodeoxyribonuclease Activity (GO:0000014)	1/9	0.169687	0.442351	0	0	6.008587786259542	10.658041841264335	ERCC1
Transforming Growth Factor Beta Receptor Activity (GO:0005024)	1/9	0.169687	0.442351	0	0	6.008587786259542	10.658041841264335	LTBP4
Tropomyosin Binding (GO:0005523)	1/9	0.169687	0.442351	0	0	6.008587786259542	10.658041841264335	NEBL
GABA-gated Chloride Ion Channel Activity (GO:0022851)	1/9	0.169687	0.442351	0	0	6.008587786259542	10.658041841264335	GABRP
Ligand-Gated Sodium Channel Activity (GO:0015280)	1/9	0.169687	0.442351	0	0	6.008587786259542	10.658041841264335	GRIK3
Platelet-Derived Growth Factor Receptor Binding (GO:0005161)	1/9	0.169687	0.442351	0	0	6.008587786259542	10.658041841264335	PDGFA
Cysteine-Type Endopeptidase Inhibitor Activity Involved in Apoptotic Process (GO:0043027)	1/9	0.169687	0.442351	0	0	6.008587786259542	10.658041841264335	GAS6
Endodeoxyribonuclease Activity, Producing 5'-Phosphomonoesters (GO:0016888)	1/9	0.169687	0.442351	0	0	6.008587786259542	10.658041841264335	DNASE1L1
fatty-acyl-CoA Binding (GO:0000062)	1/9	0.169687	0.442351	0	0	6.008587786259542	10.658041841264335	ACBD4
Growth Factor Activity (GO:0008083)	2/37	0.174574	0.442351	0	0	2.7513957307060757	4.802296523978724	IL11;PDGFA
Calcium-Dependent Phospholipid Binding (GO:0005544)	2/38	0.181932	0.442351	0	0	2.6747552149851	4.558110195291826	SYT12;ESYT2
Filamin Binding (GO:0031005)	1/10	0.186673	0.442351	0	0	5.340542832909245	8.96355865127581	NEBL
3'-5'-DNA Exonuclease Activity (GO:0008296)	1/10	0.186673	0.442351	0	0	5.340542832909245	8.96355865127581	MEIOB
Heparan Sulfate Sulfotransferase Activity (GO:0034483)	1/10	0.186673	0.442351	0	0	5.340542832909245	8.96355865127581	HS6ST2
High Voltage-Gated Calcium Channel Activity (GO:0008331)	1/10	0.186673	0.442351	0	0	5.340542832909245	8.96355865127581	CACNA1F
Hydrolase Activity, Acting on Carbon-Nitrogen (But Not Peptide) Bonds, in Cyclic Amides (GO:0016812)	1/10	0.186673	0.442351	0	0	5.340542832909245	8.96355865127581	DPEP1
GABA-A Receptor Activity (GO:0004890)	1/10	0.186673	0.442351	0	0	5.340542832909245	8.96355865127581	GABRP
Insulin-Like Growth Factor I Binding (GO:0031994)	1/10	0.186673	0.442351	0	0	5.340542832909245	8.96355865127581	IGFBP5
Ligand-Gated Channel Activity (GO:0022834)	1/10	0.186673	0.442351	0	0	5.340542832909245	8.96355865127581	P2RX2
Long-Chain Fatty Acid Transmembrane Transporter Activity (GO:0005324)	1/10	0.186673	0.442351	0	0	5.340542832909245	8.96355865127581	SLC27A1
Long-Chain Fatty acyl-CoA Hydrolase Activity (GO:0052816)	1/10	0.186673	0.442351	0	0	5.340542832909245	8.96355865127581	PLA2G6
P-type Ion Transporter Activity (GO:0015662)	1/10	0.186673	0.442351	0	0	5.340542832909245	8.96355865127581	ATP2B4
Tubulin Binding (GO:0015631)	8/270	0.189039	0.442351	0	0	1.4776231103128274	2.4614292632847214	CLIP3;TTLL6;CLIP2;BCAS3;ARHGEF2;GAS8;DYNC1I1;DNM1
Protein Phosphorylated Amino Acid Binding (GO:0045309)	2/39	0.189335	0.442351	0	0	2.602257429843637	4.330779724832666	HCK;PLCG2
Chloride Channel Activity (GO:0005254)	2/40	0.196777	0.442351	0	0	2.5335753176043556	4.1187883294759535	GABRP;CLCC1
Histone H3K9 Demethylase Activity (GO:0032454)	1/11	0.203313	0.442351	0	0	4.806106870229008	7.6561810091329185	KDM4D
Phosphatidylinositol Phosphate 5-Phosphatase Activity (GO:0034595)	1/11	0.203313	0.442351	0	0	4.806106870229008	7.6561810091329185	OCRL
Phosphatidylinositol-3,5-Bisphosphate Phosphatase Activity (GO:0106018)	1/11	0.203313	0.442351	0	0	4.806106870229008	7.6561810091329185	OCRL
Calcium Channel Inhibitor Activity (GO:0019855)	1/11	0.203313	0.442351	0	0	4.806106870229008	7.6561810091329185	TNNI3
Fatty Acid Transmembrane Transporter Activity (GO:0015245)	1/11	0.203313	0.442351	0	0	4.806106870229008	7.6561810091329185	SLC27A1
ATP Binding (GO:0005524)	7/237	0.212259	0.442351	0	0	1.4708559782608697	2.2797486325096905	ERN2;DDX25;P2RX2;OAS3;AGAP2;ATP2B4;PDK3
Metallopeptidase Activity (GO:0008237)	3/79	0.219149	0.442351	0	0	1.9017206477732793	2.8868157464300244	ECEL1;DPEP1;KLK6
Ligand-Gated Monoatomic Cation Channel Activity (GO:0099094)	2/43	0.219301	0.442351	0	0	2.3476310625175216	3.562086985004223	GRIN3B;P2RX2
3',5'-cyclic-AMP Phosphodiesterase Activity (GO:0004115)	1/12	0.219613	0.442351	0	0	4.3688410825815405	6.622672094575555	PDE6B
3',5'-cyclic-GMP Phosphodiesterase Activity (GO:0047555)	1/12	0.219613	0.442351	0	0	4.3688410825815405	6.622672094575555	PDE6B
3',5'-Cyclic-Nucleotide Phosphodiesterase Activity (GO:0004114)	1/12	0.219613	0.442351	0	0	4.3688410825815405	6.622672094575555	PDE6B
GABA Receptor Activity (GO:0016917)	1/12	0.219613	0.442351	0	0	4.3688410825815405	6.622672094575555	GABRP
Insulin-Like Growth Factor Binding (GO:0005520)	1/12	0.219613	0.442351	0	0	4.3688410825815405	6.622672094575555	IGFBP5
Phosphatidylethanolamine Binding (GO:0008429)	1/12	0.219613	0.442351	0	0	4.3688410825815405	6.622672094575555	ESYT2
Transcription Cis-Regulatory Region Binding (GO:0000976)	10/371	0.229134	0.442351	0	0	1.3402603659137442	1.9748067453777638	MLXIPL;KLF11;ZNF70;ZNF619;CREB3L4;ZNF516;ZBTB10;LHX5;ZBTB4;CTCFL
Sequence-Specific DNA Binding (GO:0043565)	11/415	0.230306	0.442351	0	0	1.317951438000943	1.9352067633958463	MLXIPL;KLF11;EMX1;CALCOCO1;TEF;CREB3L4;ONECUT1;ZBTB10;LHX5;ZBTB4;CTCFL
Monoatomic Ion Channel Activity (GO:0005216)	2/45	0.234435	0.442351	0	0	2.2380825091330303	3.246506316532399	GRIN3B;P2RX2
Nuclease Activity (GO:0004518)	2/45	0.234435	0.442351	0	0	2.2380825091330303	3.246506316532399	ERN2;DNASE1L1
Ion Channel Regulator Activity (GO:0099106)	3/82	0.235354	0.442351	0	0	1.8290652385589095	2.646041313449471	CACNG8;KCNIP1;ATP2B4
3'-5' DNA Helicase Activity (GO:0043138)	1/13	0.235582	0.442351	0	0	4.004452926208652	5.789230406964141	RECQL5
Transmembrane Receptor Protein Serine/Threonine Kinase Activity (GO:0004675)	1/13	0.235582	0.442351	0	0	4.004452926208652	5.789230406964141	LTBP4
Transmembrane-Ephrin Receptor Activity (GO:0005005)	1/13	0.235582	0.442351	0	0	4.004452926208652	5.789230406964141	EPHB1
Oxidoreductase, Paired Donors, W Incorp or Reduction of O2, NAD(P)H as One Donor, and Incorp of O (GO:0016709)	1/13	0.235582	0.442351	0	0	4.004452926208652	5.789230406964141	FMO4
Phosphatidylcholine Transporter Activity (GO:0008525)	1/13	0.235582	0.442351	0	0	4.004452926208652	5.789230406964141	ABCA3
Phospholipase A2 Activity (GO:0004623)	1/13	0.235582	0.442351	0	0	4.004452926208652	5.789230406964141	PLA2G6
Diacylglycerol-Dependent Serine/Threonine Kinase Activity (GO:0004697)	1/13	0.235582	0.442351	0	0	4.004452926208652	5.789230406964141	PRKCG
Excitatory Extracellular Ligand-Gated Monoatomic Ion Channel Activity (GO:0005231)	1/13	0.235582	0.442351	0	0	4.004452926208652	5.789230406964141	P2RX2
PDZ Domain Binding (GO:0030165)	2/47	0.249628	0.449107	0	0	2.1382716049382715	2.967457066371513	ATP2B4;F11R
MAP Kinase Activity (GO:0004707)	1/14	0.251224	0.449107	0	0	3.696124486200822	5.105858961960445	MAPK10
MAP Kinase Kinase Activity (GO:0004708)	1/14	0.251224	0.449107	0	0	3.696124486200822	5.105858961960445	MAPK10
Lysophospholipase Activity (GO:0004622)	1/14	0.251224	0.449107	0	0	3.696124486200822	5.105858961960445	PLA2G6
Phosphatidylinositol Phospholipase C Activity (GO:0004435)	1/14	0.251224	0.449107	0	0	3.696124486200822	5.105858961960445	PLCG2
Calcium Ion Sensor Activity (GO:0061891)	1/14	0.251224	0.449107	0	0	3.696124486200822	5.105858961960445	SYT12
Ephrin Receptor Activity (GO:0005003)	1/14	0.251224	0.449107	0	0	3.696124486200822	5.105858961960445	EPHB1
Myosin Binding (GO:0017022)	2/48	0.257237	0.451747	0	0	2.0916208562385474	2.8399147698130656	NPHS1;TRIOBP
Microtubule Binding (GO:0008017)	6/210	0.259947	0.451747	0	0	1.4188601510643168	1.9116009916796102	CLIP3;CLIP2;ARHGEF2;GAS8;DYNC1I1;DNM1
G Protein-Coupled Receptor Activity (GO:0004930)	3/87	0.262793	0.451747	0	0	1.7195054945054946	2.297928139316546	GPR173;ADGRG1;CALCRL
Monoatomic Anion Channel Activity (GO:0005253)	2/49	0.264849	0.451747	0	0	2.0469552457813647	2.7195730645657443	GABRP;CLCC1
Chloride Transmembrane Transporter Activity (GO:0015108)	2/49	0.264849	0.451747	0	0	2.0469552457813647	2.7195730645657443	GABRP;CLCC1
Oxidoreductase Activity, Acting on the CH-CH Group of Donors, NAD or NADP as Acceptor (GO:0016628)	1/15	0.266548	0.451747	0	0	3.4318429661941114	4.537582202300817	PTGR1
Oxidoreductase Activity, Acting on the Aldehyde or Oxo Group of Donors, NAD or NADP as Acceptor (GO:0016620)	1/15	0.266548	0.451747	0	0	3.4318429661941114	4.537582202300817	LDHD
Phospholipase C Activity (GO:0004629)	1/15	0.266548	0.451747	0	0	3.4318429661941114	4.537582202300817	PLCG2
Oxidoreductase Activity, Acting on the CH-OH Group of Donors, NAD or NADP as Acceptor (GO:0016616)	2/50	0.272462	0.458791	0	0	2.0041507024265646	2.605908821798456	LDHD;PTGR1
DNA Nuclease Activity (GO:0004536)	1/16	0.28156	0.471071	0	0	3.202798982188295	4.059261101695968	DNASE1L1
Adenyl Ribonucleotide Binding (GO:0032559)	7/262	0.289396	0.481097	0	0	1.3239736519607843	1.641674496266614	ERN2;DDX25;P2RX2;OAS3;AGAP2;ATP2B4;PDK3
Guanyl Ribonucleotide Binding (GO:0032561)	5/177	0.295777	0.486322	0	0	1.400531819001262	1.7060574823725532	ARL11;AGAP2;SCG5;TUBG2;DNM1
Fatty acyl-CoA Hydrolase Activity (GO:0047617)	1/17	0.296265	0.486322	0	0	3.002385496183206	3.652403211311509	PLA2G6
Frizzled Binding (GO:0005109)	1/18	0.310671	0.497454	0	0	2.8255500673551865	3.3031298340241917	WNT4
Transforming Growth Factor Beta Binding (GO:0050431)	1/18	0.310671	0.497454	0	0	2.8255500673551865	3.3031298340241917	LTBP4
Phospholipid Transfer Activity (GO:0120014)	1/18	0.310671	0.497454	0	0	2.8255500673551865	3.3031298340241917	PITPNM3
Calcium/Calmodulin-Dependent Protein Kinase Activity (GO:0004683)	1/18	0.310671	0.497454	0	0	2.8255500673551865	3.3031298340241917	PNCK
methyl-CpG Binding (GO:0008327)	1/19	0.324782	0.50873	0	0	2.6683630195080577	3.000840736868314	ZBTB4
Adenylyltransferase Activity (GO:0070566)	1/19	0.324782	0.50873	0	0	2.6683630195080577	3.000840736868314	OAS3
Growth Factor Receptor Binding (GO:0070851)	2/57	0.325509	0.50873	0	0	1.7481017067223963	1.9620079781851252	IL11;PDGFA
Double-Stranded RNA Binding (GO:0003725)	2/57	0.325509	0.50873	0	0	1.7481017067223963	1.9620079781851252	OAS3;DDX60
Endopeptidase Activity (GO:0004175)	5/185	0.327862	0.509357	0	0	1.3374246339362619	1.4914456631313782	C1R;HPN;ECEL1;C1RL;KLK6
Metalloendopeptidase Activity (GO:0004222)	2/58	0.33302	0.514309	0	0	1.7167487684729064	1.8876543221588777	ECEL1;KLK6
Voltage-Gated Monoatomic Ion Channel Activity (GO:0005244)	1/20	0.338606	0.51682	0	0	2.527721976697469	2.7373135964261643	GRIN3B
Phosphatidylcholine Binding (GO:0031210)	1/20	0.338606	0.51682	0	0	2.527721976697469	2.7373135964261643	ESYT2
Histone Demethylase Activity (GO:0032452)	1/21	0.352148	0.525204	0	0	2.401145038167939	2.506082378323433	KDM4D
Metal Ion Transmembrane Transporter Activity (GO:0046873)	1/21	0.352148	0.525204	0	0	2.401145038167939	2.506082378323433	ATP2B4
Peptidase Inhibitor Activity (GO:0030414)	1/21	0.352148	0.525204	0	0	2.401145038167939	2.506082378323433	SERPINB1
Protein-Cysteine S-palmitoyltransferase Activity (GO:0019706)	1/21	0.352148	0.525204	0	0	2.401145038167939	2.506082378323433	ZDHHC11
Histone H3 Demethylase Activity (GO:0141052)	1/23	0.378409	0.554858	0	0	2.1825121443442055	2.12092071372857	KDM4D
DNA Endonuclease Activity (GO:0004520)	1/23	0.378409	0.554858	0	0	2.1825121443442055	2.12092071372857	ERCC1
Serine-Type Endopeptidase Inhibitor Activity (GO:0004867)	1/23	0.378409	0.554858	0	0	2.1825121443442055	2.12092071372857	SERPINB1
Inorganic Cation Transmembrane Transporter Activity (GO:0022890)	1/24	0.391139	0.559192	0	0	2.087454364420843	1.9594773459140666	GRIN3B
Ligand-Gated Monoatomic Anion Channel Activity (GO:0099095)	1/24	0.391139	0.559192	0	0	2.087454364420843	1.9594773459140666	GABRP
Non-Membrane Spanning Protein Tyrosine Kinase Activity (GO:0004715)	1/24	0.391139	0.559192	0	0	2.087454364420843	1.9594773459140666	HCK
Palmitoyltransferase Activity (GO:0016409)	1/24	0.391139	0.559192	0	0	2.087454364420843	1.9594773459140666	ZDHHC11
Carboxylic Ester Hydrolase Activity (GO:0052689)	2/66	0.392077	0.559192	0	0	1.5011973180076628	1.4055652188343246	PLA2G6;CES3
Monoatomic Cation Transmembrane Transporter Activity (GO:0008324)	1/25	0.403609	0.572511	0	0	2.0003180661577606	1.8149048932894103	GRIN3B
Sodium Channel Regulator Activity (GO:0017080)	1/26	0.415825	0.583496	0	0	1.9201526717557251	1.6849163293445415	ATP2B4
Beta-Tubulin Binding (GO:0048487)	1/26	0.415825	0.583496	0	0	1.9201526717557251	1.6849163293445415	BCAS3
GTP Binding (GO:0005525)	4/161	0.418786	0.584509	0	0	1.224208740132307	1.0655442831180892	ARL11;AGAP2;SCG5;TUBG2
Sulfotransferase Activity (GO:0008146)	1/27	0.427791	0.593902	0	0	1.8461538461538463	1.5676050695637025	SULT1C4
Monoatomic Cation Channel Activity (GO:0005261)	2/73	0.441768	0.610061	0	0	1.3524364578274244	1.1048995121423189	SLC24A1;GRIN3B
Lipase Activity (GO:0016298)	1/29	0.450997	0.613074	0	0	1.7140130861504908	1.3648602172826456	PITPNM3
RNA Polymerase II Complex Binding (GO:0000993)	1/29	0.450997	0.613074	0	0	1.7140130861504908	1.3648602172826456	RECQL5
Cell Adhesion Mediator Activity (GO:0098631)	1/29	0.450997	0.613074	0	0	1.7140130861504908	1.3648602172826456	ROBO3
RNA Polymerase Core Enzyme Binding (GO:0043175)	1/30	0.462245	0.621887	0	0	1.6547775730455383	1.276924559168747	RECQL5
Phosphatidylinositol-3,4,5-Trisphosphate Binding (GO:0005547)	1/30	0.462245	0.621887	0	0	1.6547775730455383	1.276924559168747	DNM1
Double-Stranded DNA Binding (GO:0003690)	8/364	0.468304	0.626807	0	0	1.0791804362194315	0.8187062986254204	MLXIPL;KLF11;EMX1;TEF;CREB3L4;ONECUT1;LHX5;DDX60
Telomeric DNA Binding (GO:0042162)	1/31	0.473264	0.627015	0	0	1.5994910941475826	1.1965808676189724	ZBTB10
RNA Endonuclease Activity (GO:0004521)	1/31	0.473264	0.627015	0	0	1.5994910941475826	1.1965808676189724	ERN2
Phosphoric Diester Hydrolase Activity (GO:0008081)	1/32	0.484059	0.638077	0	0	1.5477714848559467	1.1229848160574034	PLCG2
Ion Channel Inhibitor Activity (GO:0008200)	1/33	0.494632	0.642284	0	0	1.4992843511450382	1.05540742903231	TNNI3
Basal RNA Polymerase II Transcription Machinery Binding (GO:0001099)	1/33	0.494632	0.642284	0	0	1.4992843511450382	1.05540742903231	RECQL5
Potassium Channel Regulator Activity (GO:0015459)	1/33	0.494632	0.642284	0	0	1.4992843511450382	1.05540742903231	KCNIP1
Hydro-Lyase Activity (GO:0016836)	1/35	0.515136	0.662318	0	0	1.4108666367310283	0.9358612670147799	ENO3
Metalloexopeptidase Activity (GO:0008235)	1/35	0.515136	0.662318	0	0	1.4108666367310283	0.9358612670147799	DPEP1
Single-Stranded DNA Binding (GO:0003697)	2/88	0.540122	0.691039	0	0	1.115209836941994	0.6869239801733757	ERCC1;MEIOB
Cell-Cell Adhesion Mediator Activity (GO:0098632)	1/38	0.544349	0.693049	0	0	1.296162574788529	0.7882806520805324	ROBO3
2-Oxoglutarate-Dependent Dioxygenase Activity (GO:0016706)	1/39	0.553691	0.694776	0	0	1.2619525914021696	0.7460006325381844	KDM4D
Potassium Channel Activity (GO:0005267)	1/39	0.553691	0.694776	0	0	1.2619525914021696	0.7460006325381844	GRIK3
Secondary Active Transmembrane Transporter Activity (GO:0015291)	1/39	0.553691	0.694776	0	0	1.2619525914021696	0.7460006325381844	SLCO1A2
Single-Stranded RNA Binding (GO:0003727)	1/40	0.562843	0.70288	0	0	1.2294969661381876	0.706659049162662	DDX60
Exopeptidase Activity (GO:0008238)	1/42	0.580589	0.719369	0	0	1.1693353193073917	0.6357815087363667	DPEP1
DNA-binding Transcription Repressor Activity, RNA Polymerase II-specific (GO:0001227)	3/147	0.581559	0.719369	0	0	0.9982371794871795	0.5410871732685959	MLXIPL;ZBTB10;ZBTB4
Protein Heterodimerization Activity (GO:0046982)	3/152	0.604303	0.742406	0	0	0.964352090862158	0.4857250141027725	MLXIPL;PDGFA;ATP1B2
Flavin Adenine Dinucleotide Binding (GO:0050660)	1/45	0.605872	0.742406	0	0	1.0893476752255378	0.5458579424793409	LDHD
Sequence-Specific Double-Stranded DNA Binding (GO:1990837)	8/412	0.609268	0.74308	0	0	0.9472335468841002	0.46935078751330445	MLXIPL;KLF11;EMX1;TEF;CREB3L4;ONECUT1;LHX5;CTCFL
Kinase Binding (GO:0019900)	7/363	0.615791	0.747541	0	0	0.9405942766853933	0.45604565461189656	AGAP2;PLCG2;TNNI3;TICAM1;ZBTB4;SPG11;DNM1
Damaged DNA Binding (GO:0003684)	1/47	0.621877	0.751435	0	0	1.0418187852638565	0.49487681077486434	ERCC1
RNA Nuclease Activity (GO:0004540)	1/49	0.637235	0.766444	0	0	0.9982506361323156	0.4498278945749597	ERN2
Endonuclease Activity (GO:0004519)	1/50	0.64468	0.771841	0	0	0.9778002804175105	0.42925592727675943	ERN2
Cytokine Receptor Binding (GO:0005126)	1/51	0.651972	0.777008	0	0	0.9581679389312977	0.4098600354450776	IL11
Carboxylic Acid Transmembrane Transporter Activity (GO:0046943)	1/52	0.659115	0.778412	0	0	0.9393054931896423	0.3915564198495793	GRIK3
Polyubiquitin Modification-Dependent Protein Binding (GO:0031593)	1/52	0.659115	0.778412	0	0	0.9393054931896423	0.3915564198495793	DZIP3
Endopeptidase Inhibitor Activity (GO:0004866)	1/53	0.666112	0.783132	0	0	0.9211685261303582	0.374268551145712	SERPINB1
DNA-binding Transcription Factor Binding (GO:0140297)	4/223	0.672434	0.787019	0	0	0.873256818462298	0.3465533938372561	STAT5A;MLXIPL;CREB3L4;EBF4
GDP Binding (GO:0019003)	1/55	0.67968	0.791948	0	0	0.8869098105739327	0.3424658963738898	DNM1
Methylated Histone Binding (GO:0035064)	1/56	0.686256	0.796057	0	0	0.8707147814018042	0.3278281147544742	L3MBTL1
Methylation-Dependent Protein Binding (GO:0140034)	1/58	0.699008	0.807261	0	0	0.8400294629704032	0.30080875565659404	L3MBTL1
Phosphatase Activity (GO:0016791)	1/59	0.705189	0.810631	0	0	0.8254803895762043	0.28833153768725406	OCRL
Small GTPase Binding (GO:0031267)	3/178	0.708993	0.810631	0	0	0.8193626373626374	0.28178725270393007	OCRL;ARHGEF2;TRIOBP
Phosphatidylinositol-4,5-Bisphosphate Binding (GO:0005546)	1/60	0.711244	0.810631	0	0	0.8114245051106224	0.2764850149388406	DNM1
Protein Kinase Binding (GO:0019901)	7/408	0.733349	0.832192	0	0	0.8319728023690773	0.25802229755049305	AGAP2;PLCG2;TNNI3;TICAM1;ZBTB4;SPG11;DNM1
DNA-binding Transcription Activator Activity, RNA Polymerase II-specific (GO:0001228)	3/188	0.743166	0.839681	0	0	0.7744490644490645	0.22988472856815817	CREB3L4;ONECUT1;CTCFL
Cation Binding (GO:0043169)	1/69	0.760453	0.855509	0	0	0.7035249214189493	0.1926542687522363	ESYT2
Protein Serine/Threonine Kinase Activity (GO:0004674)	5/313	0.771066	0.863726	0	0	0.7735578375113259	0.20111042391432998	PRKCG;ERN2;PNCK;PDK3;ULK2
GTPase Binding (GO:0051020)	3/201	0.782743	0.873059	0	0	0.7228438228438229	0.1770614944393995	OCRL;ARHGEF2;TRIOBP
Protein Homodimerization Activity (GO:0042803)	8/491	0.791171	0.873161	0	0	0.7871716802663095	0.18438825293810016	TOX3;MLXIPL;CREB3L4;PDGFA;TNNI3;F11R;ZBTB4;DNM1
Ubiquitin-Protein Transferase Activity (GO:0004842)	5/322	0.791831	0.873161	0	0	0.7510454111950701	0.17529984513796584	CUL9;LNX1;TRIM38;NCCRP1;DZIP3
Phosphatidylinositol Bisphosphate Binding (GO:1902936)	1/76	0.79287	0.873161	0	0	0.6375063613231552	0.14796248482644894	DNM1
G Protein-Coupled Receptor Binding (GO:0001664)	1/77	0.79713	0.874163	0	0	0.6290678987545198	0.1426334890831401	WNT4
Protein Tyrosine Kinase Activity (GO:0004713)	1/79	0.805389	0.879525	0	0	0.6128400861225288	0.13263713187231488	HCK
Protease Binding (GO:0002020)	1/80	0.809392	0.880213	0	0	0.6050343028311914	0.12794798905433635	COL1A2
Transcription Coregulator Binding (GO:0001221)	1/83	0.820915	0.889041	0	0	0.5827592627071309	0.1149990861083295	CREB3L4
Protein Kinase Activator Activity (GO:0030295)	1/87	0.835207	0.900717	0	0	0.5554766554233979	0.10002768346648044	AGAP2
Phosphatidylinositol Phosphate Binding (GO:1901981)	1/88	0.838599	0.900717	0	0	0.5490479950864262	0.09664487430521956	DNM1
Nuclear Receptor Binding (GO:0016922)	1/94	0.857538	0.91354	0	0	0.5133792990232291	0.07890127347712365	BCAS3
Phosphatase Binding (GO:0019902)	1/94	0.857538	0.91354	0	0	0.5133792990232291	0.07890127347712365	DZIP3
Protein Phosphatase Binding (GO:0019903)	1/96	0.863345	0.915988	0	0	0.50249096022499	0.07383639342907744	ATP2B4
RNA Polymerase II-specific DNA-binding Transcription Factor Binding (GO:0061629)	2/172	0.870259	0.918022	0	0	0.5603786342123056	0.07787286578637143	MLXIPL;BCAS3
Ubiquitin Protein Ligase Activity (GO:0061630)	3/240	0.872296	0.918022	0	0	0.6019961051606622	0.08224837299179683	CUL9;TRIM38;NCCRP1
GTPase Activator Activity (GO:0005096)	2/175	0.876468	0.918707	0	0	0.5505282041060394	0.07259024897748466	AGAP2;OCRL
Ubiquitin-Like Protein Ligase Activity (GO:0061659)	3/253	0.893934	0.933267	0	0	0.5700923076923077	0.0639209538006592	CUL9;TRIM38;NCCRP1
GTPase Activity (GO:0003924)	2/201	0.919859	0.956507	0	0	0.4775987215772348	0.039896129438442576	AGAP2;DNM1
Ribonucleoside Triphosphate Phosphatase Activity (GO:0017111)	2/206	0.926365	0.95945	0	0	0.46570505596874767	0.03562028319095979	AGAP2;DNM1
Cadherin Binding (GO:0045296)	3/289	0.937746	0.96527	0	0	0.49688004303388916	0.031937548284114096	AHNAK;ESYT2;F11R
Magnesium Ion Binding (GO:0000287)	1/135	0.939382	0.96527	0	0	0.3551327332801641	0.022207543622999978	ERN2
Actin Binding (GO:0003779)	1/143	0.948708	0.97103	0	0	0.33491022470702075	0.017634565405850337	TNNI3
Ubiquitin Protein Ligase Binding (GO:0031625)	2/239	0.958312	0.977029	0	0	0.39979307111563767	0.017023770599305214	SYT12;TRIOBP
Ubiquitin-Like Protein Ligase Binding (GO:0044389)	2/253	0.967407	0.982463	0	0	0.3770664468562531	0.012494646469467111	SYT12;TRIOBP
Zinc Ion Binding (GO:0008270)	2/263	0.972702	0.984013	0	0	0.36232586133497746	0.010028109731245405	DPEP1;ARHGEF2
Anion Binding (GO:0043168)	2/306	0.987428	0.995053	0	0	0.3099919338576326	0.003921827912475416	LDHD;DNM1
Transition Metal Ion Binding (GO:0046914)	2/359	0.995281	0.996721	0	0	0.2628331025896949	0.0012432772682604083	DPEP1;ARHGEF2
mRNA Binding (GO:0003729)	1/274	0.996721	0.996721	0	0	0.17237088611134413	5.661336484731335E-4	DDX25

## Sheet: GOBP_Upregulated_in_8p
Term	Overlap	P-value	Adjusted P-value	Old P-value	Old Adjusted P-value	Odds Ratio	Combined Score	Genes
Nervous System Development (GO:0007399)	40/343	5.66595e-06	0.0155077	0	0	2.3389424144208144	28.25684696389614	TRIM71;NLGN3;NLGN1;CHD7;MSI2;SPG7;CELSR1;EFNA5;HAPLN3;NR2C2;UGT8;RPS6KA3;NHLH2;OPHN1;ZIC2;FLRT3;MDK;ZIC3;NTF3;IGF2BP3;IGF2BP2;FARP1;MBD5;JAG1;ADGRV1;LSAMP;VPS13B;SOX11;ZIC5;TGFBR1;CYP26A1;NFASC;DLG1;AXL;TYRO3;SP8;EVL;HAP1;CNTN4;ADGRL3
Central Nervous System Development (GO:0007417)	26/202	4.71024e-05	0.0358918	0	0	2.591175296153334	25.816360439119425	MYRF;CHD7;MSI2;CELSR1;HAPLN3;C3;RPS6KA3;NHLH2;UGT8;ZIC2;ZIC3;SOX15;CDK5RAP3;PBX3;VPS13B;SOX11;ZIC5;SMARCA1;HSPG2;PBX1;CYP26A1;NFASC;NDUFS4;SP8;HAP1;CNTN4
Negative Regulation of Cell Motility (GO:2000146)	18/114	4.85488e-05	0.0358918	0	0	3.2724312590448625	32.50486356469836	EPHA4;GSK3B;JAG1;CITED2;ARID4A;ARID4B;MIA3;PTPRJ;TGFBR1;RAP2C;STK26;DPYSL3;SINHCAF;SLIT2;ARID2;OGT;RECK;SCAI
Positive Regulation of Cell Adhesion Mediated by Integrin (GO:0033630)	5/9	5.24542e-05	0.0358918	0	0	21.576704545454547	212.65072484862532	RET;TGFB2;SYK;PODXL;NCOA3
Regulation of DNA-templated Transcription (GO:0006355)	120/1583	0.000134695	0.0685367	0	0	1.489090839461673	13.271521635100795	ARID4A;ARID4B;SALL1;ZNF608;ZFP30;SALL3;SOX15;CREB3L2;ZNF449;ZNF844;ZNF445;ARID2;ZFP37;ZNF442;ZNF441;DDX17;SKIDA1;ZNF12;ZNF14;POU3F4;MAF;TBL1XR1;PSPC1;ZNF678;ZNF711;ADNP;ZNF555;ZNF311;ZNF431;ZNF275;IGSF1;PSEN1;NHLH2;BRIP1;ZNF549;ZKSCAN8;HIVEP1;PATZ1;ZNF664;ZSCAN18;BARD1;ZNF660;PHC1;ZBTB14;FZD4;NFXL1;NR1D2;SMARCA1;ZFHX4;SP4;ID2;ZNF417;ID1;ZNF658;NFE2L3;SP8;OGT;ZNF652;RET;SETD5;BNC2;CITED2;CHD7;CHD6…
Negative Regulation of Cell Migration (GO:0030336)	20/147	0.000161611	0.0685367	0	0	2.749391449436019	24.003066475151826	EPHA4;GSK3B;JAG1;CITED2;ARID4A;ARID4B;MIA3;PTPRJ;TGFBR1;RAP2C;STK26;DPYSL3;EVL;SINHCAF;SLIT2;ARID2;OGT;RECK;SCAI;PFN2
Regulation of Peroxisome Proliferator Activated Receptor Signaling Pathway (GO:0035358)	5/11	0.000175286	0.0685367	0	0	14.382102272727273	124.39214295794358	PTGIS;CITED2;LMO3;PAQR3;SIRT1
Synapse Organization (GO:0050808)	16/106	0.000215829	0.0738404	0	0	3.0953342953342955	26.127793914693434	NLGN3;FARP1;NLGN1;PTPRS;ANK3;PSEN1;SYN3;REST;FLRT3;PTK7;HMCN2;SLITRK5;APBB2;CNTN4;GPC4;ADGRL3
Neuron Cell-Cell Adhesion (GO:0007158)	5/12	0.000286892	0.0872472	0	0	12.326501623376624	100.53991926496762	NLGN3;RET;NLGN1;CNTN4;ASTN2
Regulation of Transcription by RNA Polymerase II (GO:0006357)	119/1616	0.000465068	0.127289	0	0	1.436116300397405	11.019790749751987	CCNT2;ARID4A;ARID4B;RPS6KA3;SALL1;ZNF608;ZFP30;SALL3;SOX15;CREB3L2;ZNF449;ZNF844;ZNF445;ARID2;ZFP37;ZNF442;TLE4;ZNF441;DDX17;ZBTB39;SKIDA1;LMO3;UBE2E1;SOX11;ZNF12;ZNF14;POU3F4;MAF;TBL1XR1;ZNF711;ADNP;LRIF1;ZNF555;ZNF311;ZNF431;ZNF275;PSEN1;NHLH2;BRIP1;ZNF549;ZKSCAN8;HLTF;HIVEP1;PATZ1;ZSCAN18;BARD1;ZNF660;JAG1;ZBTB14;FZD4;NR1D2;SMARCA1;ZFHX4;PBX1;BCL9;DLG1;SP4;ID2;ZNF417;ID1;ZNF658;NFE2L3;SP8;OGT;…
Regulation of Cell Migration (GO:0030334)	35/354	0.000573808	0.129261	0	0	1.926899714426574	14.380867505539054	RET;GSK3B;CITED2;CLSTN1;ARID4A;MIA3;PTPRJ;ARID4B;MDK;PODXL;DPYSL3;NTF3;CTNNA2;SLIT2;ARID2;GLUL;APPL2;SOCS4;SCAI;EPHA4;HACE1;JAG1;FZD4;SEMA6D;SEMA4C;ADAM10;SORL1;TGFBR1;RAP2C;CXCL12;STK26;SINHCAF;SOS1;OGT;RECK
Skeletal System Development (GO:0001501)	14/94	0.000604281	0.129261	0	0	3.040719424460432	22.536203836897183	TGFB2;CHD7;COL11A2;EIF2AK3;HAPLN3;TGFBR1;RFLNA;KIAA1217;RPS6KA3;MMP16;CREB3L2;ITGB8;COL9A2;FGFR2
Epithelial Tube Formation (GO:0072175)	3/4	0.000639384	0.129261	0	0	51.65014164305949	379.8870468655686	PODXL;CEP290;FGFR2
Embryonic Digestive Tract Development (GO:0048566)	5/14	0.000661184	0.129261	0	0	9.585700757575758	70.18150781152666	TGFB2;SALL1;ID2;SOX11;FGFR2
Axonogenesis (GO:0007409)	20/165	0.000749239	0.132593	0	0	2.404484260047045	17.30375675872676	RET;NLGN3;EPHA4;SEMA6D;SEMA4C;PTPRJ;ANK3;EFNA5;SHTN1;NFASC;CXCL12;OPHN1;SLITRK5;EVL;EMB;CTNNA2;CNTN4;SLIT2;SOS1;FGFR2
Positive Regulation of Developmental Process (GO:0051094)	22/190	0.000780938	0.132593	0	0	2.285090455396132	16.34985704173861	GSK3B;NLGN1;NUMA1;FZD4;NCOA3;ARID4A;ARID4B;PSEN1;NR2C2;SIRT1;SORL1;TGFBR1;ZDHHC15;RPS6KA3;APELA;REST;CXCL12;MDK;SINHCAF;LRIF1;ARID2;OGT
Regulation of Gene Expression (GO:0010468)	67/825	0.000823561	0.132593	0	0	1.569275598188379	11.14479523499357	TRIM71;SETD5;GSK3B;BNC2;CITED2;CLSTN1;CHD7;CHD6;RSF1;AFF4;SOX15;ITGB8;ZFP37;ERMAP;KDM6A;ZBTB39;TGIF2;ATRX;ADAM10;SOX11;ANK2;ANK3;SIRT1;TGFBR1;RBL2;PSPC1;MTF2;RBM12B;ZNF117;ZNF678;ZNF711;ADNP;HNRNPH3;CD46;ZNF431;IGSF1;PSEN1;NR2C2;BRIP1;HNRNPDL;IGF2BP3;APBB2;IGF2BP2;MBNL3;PATZ1;RBM12;ZNF664;APBB3;ATF7IP;TGFB2;ZNF460;ZBTB14;CNBP;EIF2AK3;NFXL1;NR1D2;SMARCA1;PARP14;ACVR2B;HIPK2;ZNF33A;REST;ZNF737;ID2;…
Sensory Perception of Smell (GO:0007608)	4/9	0.00092219	0.140224	0	0	13.78836879432624	96.36358735061974	GNAL;UBR3;GFY;BBS4
Neuron Differentiation (GO:0030182)	15/113	0.00132982	0.174809	0	0	2.6593836381814975	17.612339133880102	IRX1;TGFB2;MYEF2;IRX5;FZD4;PBX3;SOX11;SMARCA1;PBX1;TGFBR1;OPHN1;FUT9;SOX15;ID2;ID1
Regulation of Neuron Differentiation (GO:0045664)	9/50	0.00145791	0.174809	0	0	3.7991289198606273	24.811159766390432	TCF7L2;GPRC5B;IMPACT;NLGN1;REST;ID2;SOX11;CNTN4;CDK5RAP3
Sensory Perception of Chemical Stimulus (GO:0007606)	4/10	0.00147022	0.174809	0	0	11.48936170212766	74.93755152611851	GNAL;UBR3;GFY;BBS4
Negative Regulation of Cell Development (GO:0010721)	4/10	0.00147022	0.174809	0	0	11.48936170212766	74.93755152611851	GSK3B;REST;SORL1;RFLNA
Extracellular Matrix Organization (GO:0030198)	16/126	0.00150235	0.174809	0	0	2.5283484192575103	16.436098696415442	TGFB2;COL14A1;COL11A2;ADAM10;TGFBR1;ADAMTS14;ADAMTS13;COL5A1;MMP16;MMP17;COL4A6;COL9A1;COL4A5;HMCN1;COL9A2;RECK
Positive Regulation of Peroxisome Proliferator Activated Receptor Signaling Pathway (GO:0035360)	3/5	0.00153285	0.174809	0	0	25.822946175637394	167.34890028551638	PTGIS;CITED2;LMO3
Axon Guidance (GO:0007411)	16/128	0.00177403	0.183312	0	0	2.482787054215626	15.727214532289251	RET;EPHA4;SEMA6D;NCOA3;SEMA4C;PTPRJ;EFNA5;NFASC;CXCL12;OPHN1;EVL;NCAM1;CNTN4;EMB;SLIT2;SOS1
Myoblast Differentiation (GO:0045445)	5/17	0.00178001	0.183312	0	0	7.1875	45.50502758244057	TCF7L2;REST;JAG1;SOX15;PLEKHM3
Visual System Development (GO:0150063)	6/25	0.0019706	0.183312	0	0	5.451972748371641	33.96262000436893	C3;TGFB2;CPAMD8;PBX3;PBX1;HIPK2
Generation of Neurons (GO:0048699)	16/130	0.00208572	0.183312	0	0	2.4388243335611755	15.053984785762694	IRX1;TGFB2;MYEF2;IRX5;FZD4;SOX11;CELSR1;SMARCA1;OPHN1;ABI2;FUT9;SOX15;ID2;ID1;ASTN2;ADGRL3
Negative Regulation of Transcription by RNA Polymerase II (GO:0000122)	45/525	0.00210275	0.183312	0	0	1.6485316265060241	10.162385874893939	SATB1;CITED2;ARID4A;ARID4B;PSEN1;NR2C2;N4BP2L2;STRN3;PURA;BRIP1;SALL1;ZNF608;SOX15;HIVEP1;APBB2;PATZ1;MTA3;TLE4;IRX1;ZBTB39;TCF7L2;KLF12;TGIF2;ZBTB14;CNBP;SOX11;NR1D2;SIRT1;ACVR2B;IMPACT;DLG1;REST;MAF;PER3;TBL1XR1;ID2;ID1;ZNF217;LCOR;SINHCAF;LRIF1;OGT;FGFR2;ZNF431;ZNF354B
Regulation of Tissue Remodeling (GO:0034103)	4/11	0.00221019	0.183312	0	0	9.847213779128673	60.21253910175594	LEPROT;MDK;SUCO;THBS4
Embryonic Skeletal System Morphogenesis (GO:0048704)	4/11	0.00221019	0.183312	0	0	9.847213779128673	60.21253910175594	IRX5;SOX11;TGFBR1;FGFR2
Forebrain Neuron Differentiation (GO:0021879)	4/11	0.00221019	0.183312	0	0	9.847213779128673	60.21253910175594	SALL1;OPHN1;CHD6;ZSWIM6
Negative Regulation of Stem Cell Differentiation (GO:2000737)	4/11	0.00221019	0.183312	0	0	9.847213779128673	60.21253910175594	GSK3B;REST;JAG1;N4BP2L2
Cell-Cell Adhesion via Plasma-Membrane Adhesion Molecules (GO:0098742)	14/108	0.00238349	0.191871	0	0	2.584846165620695	15.61038018817371	CADM3;TGFB2;NLGN1;PTPRS;CADM2;FLRT3;PTK7;HMCN2;SLITRK5;HMCN1;CNTN4;EMB;GPC4;ADGRL3
Cell Junction Organization (GO:0034330)	9/54	0.00254325	0.194893	0	0	3.4602857142857144	20.67282621659243	NLGN3;TGFB2;OPHN1;PTK7;HMCN2;APBB2;PSEN1;CNTN4;SYN3
Extracellular Structure Organization (GO:0043062)	11/75	0.00256344	0.194893	0	0	2.977525071633238	17.76512166648117	ADAMTS14;ADAMTS13;MMP16;COL14A1;MMP17;COL4A6;COL9A1;COL4A5;COL9A2;RECK;TGFBR1
Leptin-Mediated Signaling Pathway (GO:0033210)	3/6	0.00294021	0.201891	0	0	17.21388101983003	100.34443643621155	LEPROT;SIRT1;BBS4
Natural Killer Cell Differentiation (GO:0001779)	3/6	0.00294021	0.201891	0	0	17.21388101983003	100.34443643621155	CLSTN1;RABL3;PBX1
Positive Regulation of Signal Transduction (GO:0009967)	20/185	0.00301687	0.201891	0	0	2.109513128381053	12.242636932081476	NLGN3;EPHA4;TEDC1;MBD5;TGFB2;NLGN1;JAG1;CRBN;ARMC9;MIA3;PTPRJ;SIRT1;SORL1;TGFBR1;C3;SALL1;AXL;HAP1;IL6ST;FGFR2
Positive Regulation of Osteoblast Differentiation (GO:0045669)	7/36	0.00307993	0.201891	0	0	4.169810393948325	24.113380889571946	SCUBE3;SUCO;SOX11;IL6ST;SOS1;ACVR2B;ACVR2A
Neuron Projection Guidance (GO:0097485)	14/111	0.00308158	0.201891	0	0	2.5042794630275163	14.480524999518574	RET;EPHA4;SEMA6D;SEMA4C;PTPRJ;EFNA5;NFASC;CXCL12;OPHN1;EVL;CNTN4;EMB;SLIT2;SOS1
Regulation of Synaptic Transmission, GABAergic (GO:0032228)	4/12	0.00317184	0.201891	0	0	8.615602836879432	49.56938409039219	NLGN1;PLCL2;HAP1;SYN3
Ureteric Bud Development (GO:0001657)	4/12	0.00317184	0.201891	0	0	8.615602836879432	49.56938409039219	SALL1;GPC3;SLIT2;FGFR2
Eye Development (GO:0001654)	7/38	0.00423255	0.263284	0	0	3.900147045308336	21.314112950982835	TGFB2;COL5A1;CPAMD8;PBX3;CEP290;PBX1;HIPK2
Regulation of Osteoblast Differentiation (GO:0045667)	10/70	0.00479717	0.27874	0	0	2.88412017167382	15.400418760039274	GSK3B;SCUBE3;REST;SUCO;SOX11;IL6ST;SOS1;ACVR2B;ACVR2A;FGFR2
Regulation of Plasma Membrane Bounded Cell Projection Organization (GO:0120035)	5/21	0.00487369	0.27874	0	0	5.388849431818182	28.689713599295843	GSK3B;CCDC88A;PSEN1;CTNNA2;EFHC2
Regulation of RNA Biosynthetic Process (GO:2001141)	33/373	0.00490923	0.27874	0	0	1.696519317786286	9.01978070807869	SETD5;BNC2;IGSF1;CHD7;RSF1;NR2C2;BRIP1;SOX15;APBB2;PATZ1;ZFP37;ZNF664;APBB3;ATF7IP;ZNF460;TGIF2;CNBP;ATRX;NFXL1;NR1D2;SMARCA1;ACVR2B;TGFBR1;ZNF33A;REST;PSPC1;ZNF737;ZNF217;ZNF117;ZNF678;ZNF732;SSBP2;ZNF431
Positive Regulation of Cardiac Epithelial to Mesenchymal Transition (GO:0062043)	3/7	0.00493535	0.27874	0	0	12.909348441926346	68.56582218369522	TGFB2;JAG1;TGFBR1
Plasma Membrane Bounded Cell Projection Assembly (GO:0120031)	22/220	0.00499024	0.27874	0	0	1.9340126152353228	10.250791896898885	SPAG16;FBXW8;WDR19;ARMC9;IFT80;CDC14A;RAP2C;SHTN1;CCDC88A;FGD6;OPHN1;TCTN2;TMEM67;STK26;CEP70;NEK1;IFT27;POC1B;DZIP1;IFT46;CEP290;BBS4
Ventricular Septum Development (GO:0003281)	6/30	0.00522588	0.286065	0	0	4.314366998577525	22.668254190769648	TGFB2;SALL1;CITED2;SOX11;SLIT2;TGFBR1
Brain Development (GO:0007420)	14/119	0.00579137	0.310804	0	0	2.3119424460431657	11.909708804451377	PBX3;SOX11;SMARCA1;HSPG2;PBX1;NFASC;ZIC2;SOX15;NDUFS4;CNTN4;HAP1;CTNNA2;CDK5RAP3;BBS4
External Encapsulating Structure Organization (GO:0045229)	10/73	0.00648287	0.335134	0	0	2.74609987056339	13.836477471273744	ADAMTS14;ADAMTS13;MMP16;COL14A1;MMP17;COL4A6;COL9A1;COL4A5;COL9A2;RECK
Gland Development (GO:0048732)	7/41	0.00653678	0.335134	0	0	3.5551365845483494	17.883440087417316	SALL1;IGSF3;CITED2;MDK;CDK5RAP3;TGFBR1;FGFR2
Regulation of Cell Differentiation (GO:0045595)	16/146	0.00661206	0.335134	0	0	2.135819735819736	10.719379508358685	DDX17;GSK3B;NLGN1;CCNT2;PLEKHB1;NR1D2;TGFBR1;RPS6KA3;REST;MDK;ID2;SINHCAF;ARID2;MTA3;CDK5RAP3;FGFR2
Neuron Projection Morphogenesis (GO:0048812)	14/122	0.00720233	0.356512	0	0	2.247162270183853	11.086039778110013	EPHA4;FARP1;NLGN1;ANK3;SHTN1;IMPACT;FLRT3;NTF3;SLITRK5;CNTN4;CTNNA2;PPP1R12B;FGFR2;ATP9A
+ Reg of Transmembrane Receptor Prot Serine/Threonine Kinase Sgnlng Pway (GO:0090100)	9/63	0.00729437	0.356512	0	0	2.8814285714285712	14.178509177406234	SCUBE3;TGFB2;NUMA1;CITED2;SOX11;ACVR2B;TGFBR1;ACVR2A;HIPK2
Activin Receptor Signaling Pathway (GO:0032924)	4/15	0.00766388	0.357412	0	0	6.26434558349452	30.51511041625125	CITED2;ACVR2B;ACVR2A;TGFBR1
Wnt Signaling Pathway (GO:0016055)	9/64	0.00808505	0.357412	0	0	2.8288051948051947	13.628443420842116	GSK3B;TCF7L2;BCL9;FZD4;NCOA3;TMEM67;USP34;FZD6;GPC4
Positive Regulation of Cell Adhesion (GO:0045785)	9/64	0.00808505	0.357412	0	0	2.8288051948051947	13.628443420842116	RET;EPHA4;TGFB2;CXCL12;SYK;CITED2;MDK;NCOA3;PTPRJ
Protein N-linked Glycosylation via Asparagine (GO:0018279)	6/33	0.00847437	0.357412	0	0	3.834044570886676	18.291111246934403	ST6GAL1;ALG9;ALG13;UGGT2;NUDT14;ALG10B
Regulation of Hydrolase Activity (GO:0051336)	7/43	0.00852086	0.357412	0	0	3.3570750237416904	15.997260150349408	EPHA4;RABGAP1;FGD6;EFNA5;SIRT1;CDK5RAP3;PRKG1
Amine Transport (GO:0015837)	2/3	0.00876592	0.357412	0	0	34.38472418670438	162.87644447977263	SLC44A2;SLC18A2
Epithelial Tube Branching Involved in Lung Morphogenesis (GO:0060441)	2/3	0.00876592	0.357412	0	0	34.38472418670438	162.87644447977263	CELSR1;FGFR2
Inner Dynein Arm Assembly (GO:0036159)	2/3	0.00876592	0.357412	0	0	34.38472418670438	162.87644447977263	DNAH1;CCDC40
Positive Regulation of Myeloid Cell Apoptotic Process (GO:0033034)	2/3	0.00876592	0.357412	0	0	34.38472418670438	162.87644447977263	CLSTN1;SIRT1
Regulation of Potassium Ion Transport (GO:0043266)	5/24	0.00887981	0.357412	0	0	4.536857057416268	21.43199804839489	DPP10;DLG1;KCNE5;ANK2;ANK3
Ventricular Septum Morphogenesis (GO:0060412)	5/24	0.00887981	0.357412	0	0	4.536857057416268	21.43199804839489	TGFB2;CITED2;SOX11;SLIT2;TGFBR1
Positive Regulation of Neuron Differentiation (GO:0045666)	5/24	0.00887981	0.357412	0	0	4.536857057416268	21.43199804839489	TCF7L2;GPRC5B;IMPACT;REST;SOX11
+ Reg of Phosphatidylinositol 3-Kinase/Prot Kinase B Signal Transduction (GO:0051897)	13/113	0.009222	0.365806	0	0	2.2518390804597703	10.55248521731372	RET;TCF7L2;TGFB2;AKR1C3;PTPRJ;EFNA5;SIRT1;TGFBR1;CCDC88A;AXL;NTF3;TYRO3;SOS1
Homophilic Cell Adhesion via Plasma Membrane Adhesion Molecules (GO:0007156)	7/44	0.00966393	0.37786	0	0	3.266073766073766	15.152475213701505	CADM3;CADM2;PTK7;HMCN2;EMB;HMCN1;CNTN4
Gonad Development (GO:0008406)	5/25	0.0106071	0.387979	0	0	4.309659090909091	19.592699931197384	TGFB2;SALL1;IRX5;SOX15;AKR1C3
Regulation of Leukocyte Cell-Cell Adhesion (GO:1903037)	3/9	0.0109017	0.387979	0	0	8.604815864022664	38.88375290469703	FUT9;MDK;MIA3
Regulation of Leukocyte Migration (GO:0002685)	3/9	0.0109017	0.387979	0	0	8.604815864022664	38.88375290469703	PGAP1;NCOA3;MIA3
Embryonic Cranial Skeleton Morphogenesis (GO:0048701)	3/9	0.0109017	0.387979	0	0	8.604815864022664	38.88375290469703	IRX5;TGFBR1;FGFR2
Homologous Recombination (GO:0035825)	3/9	0.0109017	0.387979	0	0	8.604815864022664	38.88375290469703	BARD1;BRIP1;MRE11
Regulation of Bone Remodeling (GO:0046850)	3/9	0.0109017	0.387979	0	0	8.604815864022664	38.88375290469703	LEPROT;MDK;SUCO
Mesenchymal Cell Differentiation (GO:0048762)	7/45	0.010915	0.387979	0	0	3.179862048283101	14.3653962351304	DDX17;GSK3B;TGFB2;NCAM1;SOS1;TGFBR1;FGFR2
Sensory Organ Development (GO:0007423)	6/35	0.0113161	0.397078	0	0	3.569039093540001	15.99476069231967	TGFB2;CHD7;CPAMD8;PBX3;PBX1;HIPK2
Cilium Assembly (GO:0060271)	18/182	0.0116559	0.403824	0	0	1.9047686280046592	8.479925857227263	SPAG16;FBXW8;WDR19;ARMC9;IFT80;RPGRIP1L;CDC14A;TCTN2;TMEM67;CEP70;NEK1;IFT27;POC1B;DZIP1;IFT46;CEP290;BBS4;CCDC40
miRNA-mediated Gene Silencing by Inhibition of Translation (GO:0035278)	4/17	0.0122415	0.418813	0	0	5.2997272231314785	23.33428499272735	TRIM71;DDX6;AGO4;TNRC6B
Digestive Tract Development (GO:0048565)	5/26	0.0125507	0.418918	0	0	4.104099025974026	17.967659736388235	TGFB2;SALL1;ZIC3;FGFR2;CCDC40
miRNA-mediated Post-Transcriptional Gene Silencing (GO:0035195)	5/26	0.0125507	0.418918	0	0	4.104099025974026	17.967659736388235	TRIM71;DDX6;MOV10;AGO4;TNRC6B
Circulatory System Development (GO:0072359)	11/94	0.0141119	0.429537	0	0	2.292315393378672	9.766947195767088	APELA;TGFB2;SALL1;FLRT3;CITED2;ID2;SMYD4;DZIP1;HSPG2;TGFBR1;KDM6A
Positive Regulation of Multicellular Organismal Process (GO:0051240)	23/256	0.0144108	0.429537	0	0	1.7156683642187716	7.274047529446954	TCF7L2;LEPROT;TGFB2;NUMA1;SYK;NCOA3;CLSTN1;ARID4A;SOX11;ARID4B;GRPR;NR2C2;SIRT1;SORL1;TGFBR1;APELA;REST;CXCL12;MDK;HAP1;SINHCAF;OGT;APPL2
Positive Regulation of Cell Differentiation (GO:0045597)	19/200	0.014519	0.429537	0	0	1.8218031868043878	7.71041789063396	GSK3B;TCF7L2;TGFB2;LMO3;SUCO;SOX11;ACVR2B;TGFBR1;ACVR2A;RPS6KA3;SCUBE3;GPRC5B;IMPACT;REST;MDK;ID2;ARID2;IL6ST;SOS1
Regulation of Leukocyte Chemotaxis (GO:0002688)	3/10	0.0149438	0.429537	0	0	7.374949413193039	31.000305700050088	MDK;SLIT2;SLC8B1
Amyloid Precursor Protein Catabolic Process (GO:0042987)	3/10	0.0149438	0.429537	0	0	7.374949413193039	31.000305700050088	APH1B;ADAM10;PSEN1
Mesonephric Tubule Development (GO:0072164)	3/10	0.0149438	0.429537	0	0	7.374949413193039	31.000305700050088	SALL1;SLIT2;FGFR2
Podocyte Differentiation (GO:0072112)	3/10	0.0149438	0.429537	0	0	7.374949413193039	31.000305700050088	JAG1;PODXL;PROM1
Regulation of Neutrophil Chemotaxis (GO:0090022)	4/18	0.0150665	0.429537	0	0	4.9207700101317124	20.644010778464917	PGAP1;MDK;SLIT2;THBS4
Regulation of Vascular Endothelial Growth Factor Production (GO:0010574)	4/18	0.0150665	0.429537	0	0	4.9207700101317124	20.644010778464917	C3;EIF2AK3;MIA3;IL6ST
Respiratory System Development (GO:0060541)	4/18	0.0150665	0.429537	0	0	4.9207700101317124	20.644010778464917	ZIC3;CHD7;FGFR2;CCDC40
Positive Regulation of Vascular Endothelial Growth Factor Production (GO:0010575)	4/18	0.0150665	0.429537	0	0	4.9207700101317124	20.644010778464917	C3;EIF2AK3;MIA3;IL6ST
Heart Development (GO:0007507)	12/109	0.0167371	0.429537	0	0	2.1403659276131877	8.7543668697496	APELA;TGFB2;SALL1;FLRT3;CITED2;ID2;CHD7;GPC3;SMYD4;DZIP1;TGFBR1;KDM6A
Positive Regulation of Stem Cell Population Maintenance (GO:1902459)	6/38	0.0167474	0.429537	0	0	3.2336415362731152	13.22401086603237	REST;NCOA3;ARID4A;ARID4B;SINHCAF;OGT
Protein Processing (GO:0016485)	10/84	0.0168156	0.429537	0	0	2.33576924564049	9.542659458546838	KEL;ADAMTS13;APH1B;MMP16;MYRF;ADAM10;ATG4B;PSEN1;SPG7;OGT
Reg of Epithelial to Mesenchymal Transition Inv in Endocardial Cushion Formation (GO:1905005)	2/4	0.0168925	0.429537	0	0	17.19094766619519	70.15430279238932	TGFB2;TGFBR1
Regulation of Growth Hormone Receptor Signaling Pathway (GO:0060398)	2/4	0.0168925	0.429537	0	0	17.19094766619519	70.15430279238932	LEPROT;MBD5
T Cell Chemotaxis (GO:0010818)	2/4	0.0168925	0.429537	0	0	17.19094766619519	70.15430279238932	CXCL12;CLSTN1
Cerebral Cortex Neuron Differentiation (GO:0021895)	2/4	0.0168925	0.429537	0	0	17.19094766619519	70.15430279238932	OPHN1;CHD6
Determination of Digestive Tract Left/Right Asymmetry (GO:0071907)	2/4	0.0168925	0.429537	0	0	17.19094766619519	70.15430279238932	ZIC3;CCDC40
Determination of Liver Left/Right Asymmetry (GO:0071910)	2/4	0.0168925	0.429537	0	0	17.19094766619519	70.15430279238932	ZIC3;CCDC40
Gland Morphogenesis (GO:0022612)	2/4	0.0168925	0.429537	0	0	17.19094766619519	70.15430279238932	TGFB2;FGFR2
Negative Regulation of Ruffle Assembly (GO:1900028)	2/4	0.0168925	0.429537	0	0	17.19094766619519	70.15430279238932	EVL;PFN2
Positive Regulation of Pinocytosis (GO:0048549)	2/4	0.0168925	0.429537	0	0	17.19094766619519	70.15430279238932	AXL;APPL2
Protein Catabolic Process in the Vacuole (GO:0007039)	2/4	0.0168925	0.429537	0	0	17.19094766619519	70.15430279238932	LAMP2;TCIRG1
Regulation of Cellular Extravasation (GO:0002691)	2/4	0.0168925	0.429537	0	0	17.19094766619519	70.15430279238932	PGAP1;FUT9
Negative Regulation of Multicellular Organismal Process (GO:0051241)	16/162	0.0169724	0.429537	0	0	1.8992271047065568	7.741565413602187	EPHA4;GSK3B;ARRDC3;PLCL2;ARID4A;ARID4B;USF3;ACVR2B;SPRED1;MDK;ID1;EVL;SINHCAF;OGT;PFN2;MAP2K6
Regulation of Synapse Assembly (GO:0051963)	7/49	0.0171062	0.429537	0	0	2.876068376068376	11.700755769410248	NLGN3;SETD5;NLGN1;CLSTN1;SLITRK5;GPC4;DOCK1
Cilium Organization (GO:0044782)	17/176	0.0173049	0.430577	0	0	1.8536099901843168	7.519663014022487	SPAG16;FBXW8;WDR19;ARMC9;IFT80;CDC14A;TCTN2;TMEM67;CEP70;NEK1;IFT27;POC1B;MNS1;DZIP1;IFT46;CEP290;BBS4
Modulation of Chemical Synaptic Transmission (GO:0050804)	10/85	0.0181513	0.442534	0	0	2.3044349070100143	9.238514809890344	NLGN3;GSK3B;NLGN1;OPHN1;CLSTN1;NTF3;PLCL2;DLGAP1;SYN3;TSPOAP1
acyl-CoA Metabolic Process (GO:0006637)	4/19	0.0182705	0.442534	0	0	4.592340425531915	18.38069856172476	ACSM3;SUCLG2;MLYCD;ACACB
Carboxylic Acid Metabolic Process (GO:0019752)	4/19	0.0182705	0.442534	0	0	4.592340425531915	18.38069856172476	ST6GAL1;PTGIS;GSTO2;PCCA
Lymphocyte Differentiation (GO:0030098)	7/50	0.0189762	0.449755	0	0	2.808951169416286	11.136275425453594	LEPROT;AXL;CHD7;CLSTN1;RABL3;PTPRJ;PBX1
Regulation of Macrophage Cytokine Production (GO:0010935)	3/11	0.0197189	0.449755	0	0	6.4525495750708215	25.333859941913683	TGFB2;GPRC5B;SIRT1
Digestive Tract Morphogenesis (GO:0048546)	3/11	0.0197189	0.449755	0	0	6.4525495750708215	25.333859941913683	ID2;SOX11;FGFR2
Embryo Development Ending in Birth or Egg Hatching (GO:0009792)	3/11	0.0197189	0.449755	0	0	6.4525495750708215	25.333859941913683	TGFB2;CHD7;UBR3
Endocrine System Development (GO:0035270)	3/11	0.0197189	0.449755	0	0	6.4525495750708215	25.333859941913683	SALL1;MDK;TGFBR1
Motor Neuron Axon Guidance (GO:0008045)	3/11	0.0197189	0.449755	0	0	6.4525495750708215	25.333859941913683	EPHA4;NCOA3;SLIT2
Pancreas Development (GO:0031016)	3/11	0.0197189	0.449755	0	0	6.4525495750708215	25.333859941913683	TCF7L2;ZIC3;CCDC40
Negative Regulation of Gene Expression (GO:0010629)	24/279	0.0204089	0.461647	0	0	1.6351738943752683	6.363741639545594	TRIM71;EPHA4;DDX6;GSK3B;TGFB2;TIA1;CITED2;EIF2AK3;ADAM10;SOX11;PSEN1;PARP14;SIRT1;RBL2;REST;AGO4;ID2;MTF2;ITGB8;IGF2BP3;LRIF1;IGF2BP2;CD46;TNRC6B
Skeletal System Morphogenesis (GO:0048705)	4/20	0.0218664	0.476032	0	0	4.304964539007092	16.457039010936988	SOX11;TGFBR1;FGFR2;RFLNA
Positive Regulation of Cilium Assembly (GO:0045724)	4/20	0.0218664	0.476032	0	0	4.304964539007092	16.457039010936988	GSK3B;CCDC88A;HAP1;BBS4
Proteolysis (GO:0006508)	18/196	0.0232008	0.476032	0	0	1.7529065513260378	6.5971841178544395	RET;ADGRV1;FBXO2;ERAP1;ADAM10;PSEN1;SPG7;ADAMTS14;KEL;ADAMTS13;APH1B;CAPN12;MMP16;MMP17;ATG4B;CTSF;SOS1;OGT
Regulation of Monocyte Chemotaxis (GO:0090025)	3/12	0.0252346	0.476032	0	0	5.735127478753541	21.102630086927345	CXCL12;SLIT2;PLA2G7
Eye Photoreceptor Cell Differentiation (GO:0001754)	3/12	0.0252346	0.476032	0	0	5.735127478753541	21.102630086927345	DZANK1;PROM1;CEP290
Positive Regulation of Potassium Ion Transport (GO:0043268)	3/12	0.0252346	0.476032	0	0	5.735127478753541	21.102630086927345	DLG1;KCNE5;ANK2
Positive Regulation of Stress-Activated MAPK Cascade (GO:0032874)	3/12	0.0252346	0.476032	0	0	5.735127478753541	21.102630086927345	TGFB2;TAOK1;SEMA4C
Positive Regulation of Stress-Activated Protein Kinase Signaling Cascade (GO:0070304)	3/12	0.0252346	0.476032	0	0	5.735127478753541	21.102630086927345	TGFB2;TAOK1;SEMA4C
Cellular Component Assembly (GO:0022607)	18/198	0.0253868	0.476032	0	0	1.7331403762662807	6.3667352448714345	SPAG16;NLGN3;NLGN1;WIPF1;NCOA3;WDR19;FANCA;VPS13B;DNAJB14;ANK3;TRAF1;THSD4;OPHN1;MICAL1;DPYSL3;KNTC1;CEP290;CCDC40
Negative Regulation of Cell Adhesion (GO:0007162)	7/53	0.0254359	0.476032	0	0	2.6251083859779514	9.638329714020363	EPHA4;JAG1;MDK;PODXL;FZD4;ADAM10;MIA3
Cell Morphogenesis Involved in Neuron Differentiation (GO:0048667)	8/65	0.0257536	0.476032	0	0	2.42240408439072	8.864016162381251	SHTN1;FARP1;OPHN1;SLITRK5;ANK3;CTNNA2;CNTN4;FGFR2
Positive Regulation of Cation Channel Activity (GO:2001259)	4/21	0.0258647	0.476032	0	0	4.051397580308719	14.807360888417467	ASPH;ANK2;ANK3;HAP1
Regulation of Neuron Projection Development (GO:0010975)	14/143	0.0261864	0.476032	0	0	1.8780659193575373	6.840886700174065	RET;EPHA4;GSK3B;PTPRS;PAQR3;PSEN1;ZDHHC15;CCDC88A;FUT9;PTK7;MDK;DPYSL3;EFHC2;CTNNA2
Epithelial to Mesenchymal Transition (GO:0001837)	6/42	0.0264602	0.476032	0	0	2.873399715504979	10.436513839500327	DDX17;GSK3B;TGFB2;NCAM1;SOS1;TGFBR1
Regulation of Glial Cell Differentiation (GO:0045685)	2/5	0.0271323	0.476032	0	0	11.45968882602546	41.33545575043591	EPHA4;SLC45A3
Aminoglycoside Antibiotic Metabolic Process (GO:0030647)	2/5	0.0271323	0.476032	0	0	11.45968882602546	41.33545575043591	AKR1C3;CBR4
Regulation of Potassium Ion Export Across Plasma Membrane (GO:1903764)	2/5	0.0271323	0.476032	0	0	11.45968882602546	41.33545575043591	DLG1;KCNE5
Cellular Response to Hepatocyte Growth Factor Stimulus (GO:0035729)	2/5	0.0271323	0.476032	0	0	11.45968882602546	41.33545575043591	SOS1;APPL2
Cellular Response to Leptin Stimulus (GO:0044320)	2/5	0.0271323	0.476032	0	0	11.45968882602546	41.33545575043591	LEPROT;SIRT1
Response to Hepatocyte Growth Factor (GO:0035728)	2/5	0.0271323	0.476032	0	0	11.45968882602546	41.33545575043591	SOS1;APPL2
Cranial Nerve Development (GO:0021545)	2/5	0.0271323	0.476032	0	0	11.45968882602546	41.33545575043591	SALL1;CHD7
Daunorubicin Metabolic Process (GO:0044597)	2/5	0.0271323	0.476032	0	0	11.45968882602546	41.33545575043591	AKR1C3;CBR4
Embryonic Digestive Tract Morphogenesis (GO:0048557)	2/5	0.0271323	0.476032	0	0	11.45968882602546	41.33545575043591	ID2;SOX11
Substrate-Dependent Cell Migration, Cell Extension (GO:0006930)	2/5	0.0271323	0.476032	0	0	11.45968882602546	41.33545575043591	SHTN1;OPHN1
Exocrine System Development (GO:0035272)	2/5	0.0271323	0.476032	0	0	11.45968882602546	41.33545575043591	IGSF3;FGFR2
Mast Cell Mediated Immunity (GO:0002448)	2/5	0.0271323	0.476032	0	0	11.45968882602546	41.33545575043591	CLSTN1;SERPINB9
Negative Regulation of Axon Regeneration (GO:0048681)	2/5	0.0271323	0.476032	0	0	11.45968882602546	41.33545575043591	EPHA4;PTPRS
Negative Regulation of Dendritic Spine Development (GO:0061000)	2/5	0.0271323	0.476032	0	0	11.45968882602546	41.33545575043591	NLGN1;PTPRS
Negative Regulation of Transcription Regulatory Region DNA Binding (GO:2000678)	2/5	0.0271323	0.476032	0	0	11.45968882602546	41.33545575043591	SOX11;PSEN1
Neuron Fate Commitment (GO:0048663)	2/5	0.0271323	0.476032	0	0	11.45968882602546	41.33545575043591	ID2;TGFBR1
Nucleoside Metabolic Process (GO:0009116)	2/5	0.0271323	0.476032	0	0	11.45968882602546	41.33545575043591	OARD1;NME4
Podocyte Development (GO:0072015)	2/5	0.0271323	0.476032	0	0	11.45968882602546	41.33545575043591	JAG1;PODXL
Positive Regulation of Leukocyte Apoptotic Process (GO:2000108)	2/5	0.0271323	0.476032	0	0	11.45968882602546	41.33545575043591	CLSTN1;SIRT1
Positive Regulation of Membrane Invagination (GO:1905155)	2/5	0.0271323	0.476032	0	0	11.45968882602546	41.33545575043591	C3;APPL2
Postsynaptic Membrane Assembly (GO:0097104)	2/5	0.0271323	0.476032	0	0	11.45968882602546	41.33545575043591	NLGN3;NLGN1
Negative Regulation of DNA-templated Transcription (GO:0045892)	53/738	0.0280174	0.488431	0	0	1.3529530888374577	4.836710257433082	CITED2;ARID4A;RSF1;ARID4B;N4BP2L2;SALL1;ZNF608;ZIC2;SOX15;TLE4;ZBTB39;KLF12;TGIF2;SOX11;ZNF12;SIRT1;IMPACT;MAF;TBL1XR1;PSPC1;LCOR;SINHCAF;LRIF1;ZNF431;SATB1;PSEN1;NR2C2;STRN3;PURA;BRIP1;BTAF1;HIVEP1;APBB2;PATZ1;MTA3;IRX1;ATF7IP;TCF7L2;PHC1;ZBTB14;CNBP;NR1D2;ACVR2B;DLG1;REST;PER3;ID2;ID1;ZNF658;ZNF217;OGT;FGFR2;ZNF354B
Integrated Stress Response Signaling (GO:0140467)	5/32	0.0293211	0.507923	0	0	3.1904987373737375	11.260698694944574	IMPACT;MAF;MAP3K20;EIF2AK3;NFE2L3
Regulation of Epithelial to Mesenchymal Transition (GO:0010717)	8/67	0.0302638	0.514646	0	0	2.3399018351507532	8.184517708517896	GSK3B;EPHA4;TCF7L2;SPRED1;TGFB2;MDK;USF3;TGFBR1
Cellular Response to Amyloid-Beta (GO:1904646)	4/22	0.0302733	0.514646	0	0	3.826004728132388	13.381409822473344	GSK3B;EPHA4;SYK;PSEN1
Lung Development (GO:0030324)	4/22	0.0302733	0.514646	0	0	3.826004728132388	13.381409822473344	ZIC3;SOX11;FGFR2;CCDC40
Protein N-linked Glycosylation (GO:0006487)	7/55	0.0304925	0.515172	0	0	2.5153133903133904	8.77913700777421	ST6GAL1;ALG9;FUT9;ALG13;UGGT2;NUDT14;ALG10B
Regulation of Regulatory T Cell Differentiation (GO:0045589)	3/13	0.0314899	0.519203	0	0	5.161189801699717	17.847857770596406	MDK;FANCA;CD46
Synaptic Membrane Adhesion (GO:0099560)	3/13	0.0314899	0.519203	0	0	5.161189801699717	17.847857770596406	PTPRS;SLITRK5;GPC4
Eye Photoreceptor Cell Development (GO:0042462)	3/13	0.0314899	0.519203	0	0	5.161189801699717	17.847857770596406	DZANK1;RPGRIP1L;CEP290
Neuromuscular Synaptic Transmission (GO:0007274)	3/13	0.0314899	0.519203	0	0	5.161189801699717	17.847857770596406	FCHSD1;FCHSD2;TSPOAP1
Regulation of Phosphatidylinositol 3-Kinase/Protein Kinase B Signal Transduction (GO:0051896)	15/161	0.0323072	0.526314	0	0	1.7779598120879554	6.102786017259199	RET;TCF7L2;TGFB2;USP49;AKR1C3;PTPRJ;EFNA5;SIRT1;TGFBR1;CCDC88A;AXL;NTF3;TYRO3;SOS1;OTUD3
Positive Regulation of Endothelial Cell Proliferation (GO:0001938)	7/56	0.0332572	0.526314	0	0	2.4637769637769638	8.385427747970589	APELA;MDK;CLSTN1;MIA3;SIRT1;TGFBR1;THBS4
Positive Regulation of Epithelial Cell Proliferation (GO:0050679)	9/81	0.0337069	0.526314	0	0	2.157857142857143	7.315248847856354	TCF7L2;MDK;CLSTN1;SOX11;MIA3;SIRT1;FGFR2;TGFBR1;THBS4
Regulation of Actin Polymerization or Depolymerization (GO:0008064)	4/23	0.0350978	0.526314	0	0	3.6243374393430385	12.140140182660796	FCHSD1;CXCL12;FCHSD2;PFN2
Regulation of Transforming Growth Factor Beta Receptor Signaling Pathway (GO:0017015)	10/96	0.0383749	0.526314	0	0	2.0078517483448115	6.5463051014548235	BCL9;SPRED1;CITED2;ARID4A;ARID4B;SOX11;SINHCAF;OGT;SIRT1;HIPK2
Energy Reserve Metabolic Process (GO:0006112)	3/14	0.0384764	0.526314	0	0	4.691604429564769	15.28389288456245	GSK3B;LEPROT;PPP1R3C
Inner Ear Morphogenesis (GO:0042472)	3/14	0.0384764	0.526314	0	0	4.691604429564769	15.28389288456245	CHD7;FGFR2;POU3F4
Intraciliary Anterograde Transport (GO:0035720)	3/14	0.0384764	0.526314	0	0	4.691604429564769	15.28389288456245	IFT27;IFT80;IFT46
Myotube Differentiation (GO:0014902)	3/14	0.0384764	0.526314	0	0	4.691604429564769	15.28389288456245	MYEF2;DOCK1;CACNA1H
Positive Regulation of Cation Transmembrane Transport (GO:1904064)	3/14	0.0384764	0.526314	0	0	4.691604429564769	15.28389288456245	KCNE5;ANK2;ANK3
Regulation of Glucan Biosynthetic Process (GO:0010962)	2/6	0.0392283	0.526314	0	0	8.594059405940595	27.83062312919904	PPP1R3C;PPP1R3B
Adrenal Gland Development (GO:0030325)	2/6	0.0392283	0.526314	0	0	8.594059405940595	27.83062312919904	SALL1;MDK
Regulation of Neutrophil Migration (GO:1902622)	2/6	0.0392283	0.526314	0	0	8.594059405940595	27.83062312919904	PGAP1;NCOA3
Regulation of Skeletal Muscle Cell Differentiation (GO:2001014)	2/6	0.0392283	0.526314	0	0	8.594059405940595	27.83062312919904	DDX17;NR1D2
Cardiac Right Ventricle Morphogenesis (GO:0003215)	2/6	0.0392283	0.526314	0	0	8.594059405940595	27.83062312919904	TGFB2;JAG1
Cardioblast Differentiation (GO:0010002)	2/6	0.0392283	0.526314	0	0	8.594059405940595	27.83062312919904	REST;TGFB2
Regulation of Superoxide Metabolic Process (GO:0090322)	2/6	0.0392283	0.526314	0	0	8.594059405940595	27.83062312919904	PGAP1;SYK
Response to Leptin (GO:0044321)	2/6	0.0392283	0.526314	0	0	8.594059405940595	27.83062312919904	LEPROT;SIRT1
Coronary Vasculature Morphogenesis (GO:0060977)	2/6	0.0392283	0.526314	0	0	8.594059405940595	27.83062312919904	SPRED1;TGFBR1
Doxorubicin Metabolic Process (GO:0044598)	2/6	0.0392283	0.526314	0	0	8.594059405940595	27.83062312919904	AKR1C3;CBR4
Embryonic Heart Tube Development (GO:0035050)	2/6	0.0392283	0.526314	0	0	8.594059405940595	27.83062312919904	APELA;CITED2
Synaptic Vesicle Clustering (GO:0097091)	2/6	0.0392283	0.526314	0	0	8.594059405940595	27.83062312919904	NLGN1;SYN3
Synaptic Vesicle Localization (GO:0097479)	2/6	0.0392283	0.526314	0	0	8.594059405940595	27.83062312919904	NLGN1;SYN3
Ventricular Trabecula Myocardium Morphogenesis (GO:0003222)	2/6	0.0392283	0.526314	0	0	8.594059405940595	27.83062312919904	TGFB2;TGFBR1
Glomerular Epithelial Cell Development (GO:0072310)	2/6	0.0392283	0.526314	0	0	8.594059405940595	27.83062312919904	JAG1;PODXL
Induction of Positive Chemotaxis (GO:0050930)	2/6	0.0392283	0.526314	0	0	8.594059405940595	27.83062312919904	CXCL12;NTF3
Lymphocyte Mediated Immunity (GO:0002449)	2/6	0.0392283	0.526314	0	0	8.594059405940595	27.83062312919904	JAG1;CD46
Maintenance of Lens Transparency (GO:0036438)	2/6	0.0392283	0.526314	0	0	8.594059405940595	27.83062312919904	VPS13B;APBB2
miRNA-mediated Gene Silencing by mRNA Destabilization (GO:0035279)	2/6	0.0392283	0.526314	0	0	8.594059405940595	27.83062312919904	MOV10;AGO4
Negative Regulation of Neuron Projection Regeneration (GO:0070571)	2/6	0.0392283	0.526314	0	0	8.594059405940595	27.83062312919904	EPHA4;PTPRS
Negative Regulation of Triglyceride Metabolic Process (GO:0090209)	2/6	0.0392283	0.526314	0	0	8.594059405940595	27.83062312919904	SIRT1;SORL1
Polyketide Metabolic Process (GO:0030638)	2/6	0.0392283	0.526314	0	0	8.594059405940595	27.83062312919904	AKR1C3;CBR4
Positive Regulation of Adaptive Immune Response (GO:0002821)	2/6	0.0392283	0.526314	0	0	8.594059405940595	27.83062312919904	IL6ST;SIRT1
Positive Regulation of Adipose Tissue Development (GO:1904179)	2/6	0.0392283	0.526314	0	0	8.594059405940595	27.83062312919904	SIRT1;SORL1
Positive Regulation of Behavior (GO:0048520)	2/6	0.0392283	0.526314	0	0	8.594059405940595	27.83062312919904	NLGN1;GRPR
Positive Regulation of Phagocytosis, Engulfment (GO:0060100)	2/6	0.0392283	0.526314	0	0	8.594059405940595	27.83062312919904	C3;APPL2
Positive Regulation of Synaptic Transmission, GABAergic (GO:0032230)	2/6	0.0392283	0.526314	0	0	8.594059405940595	27.83062312919904	NLGN1;HAP1
Postsynapse Assembly (GO:0099068)	2/6	0.0392283	0.526314	0	0	8.594059405940595	27.83062312919904	NLGN3;NLGN1
Cellular Response to Retinoic Acid (GO:0071300)	4/24	0.0403414	0.535993	0	0	3.4428368794326243	11.052802617225776	RET;GSK3B;FZD4;PTK7
Regulation of Cell Adhesion Mediated by Integrin (GO:0033628)	4/24	0.0403414	0.535993	0	0	3.4428368794326243	11.052802617225776	RET;TGFB2;SYK;NCOA3
Regulation of Cilium Assembly (GO:1902017)	8/71	0.0408484	0.538746	0	0	2.1906120508117657	7.005329922571217	GSK3B;CCDC88A;TBC1D19;MPHOSPH9;RABGAP1;TBC1D8;TBC1D2B;BBS4
Regulation of Small GTPase Mediated Signal Transduction (GO:0051056)	13/138	0.0409985	0.538746	0	0	1.797735632183908	5.742362335680141	DOCK6;DENND4C;ARHGAP5;PREX2;DOCK11;PREX1;ARHGEF9;OBSCN;OPHN1;RABL3;SLIT2;OGT;RALGPS1
Renal System Development (GO:0072001)	5/35	0.041336	0.538746	0	0	2.8707386363636362	9.146234621828864	TGFB2;SALL1;IFT27;CEP290;TGFBR1
Regulation of Cell-Cell Adhesion (GO:0022407)	5/35	0.041336	0.538746	0	0	2.8707386363636362	9.146234621828864	JAG1;CITED2;FUT9;PODXL;EFNA5
Glycolipid Biosynthetic Process (GO:0009247)	6/47	0.0430673	0.55865	0	0	2.521944280609236	7.93149196809115	UGT8;PGAP1;PIGN;FUT9;PIGM;ST6GALNAC5
Negative Regulation of Cold-Induced Thermogenesis (GO:0120163)	5/36	0.0459123	0.566786	0	0	2.7779050586510263	8.558790085793431	ARRDC3;PLCL2;ID1;ACVR2B;MAP2K6
Positive Regulation of Epithelial to Mesenchymal Transition (GO:0010718)	5/36	0.0459123	0.566786	0	0	2.7779050586510263	8.558790085793431	TCF7L2;TGFB2;JAG1;MDK;TGFBR1
Regulation of Glucose Metabolic Process (GO:0010906)	4/25	0.0460051	0.566786	0	0	3.2786220871327254	10.094886945661058	SLC45A3;MLYCD;SIRT1;OGT
Liver Development (GO:0001889)	4/25	0.0460051	0.566786	0	0	3.2786220871327254	10.094886945661058	CITED2;ZIC3;CDK5RAP3;CCDC40
Negative Regulation of MAP Kinase Activity (GO:0043407)	4/25	0.0460051	0.566786	0	0	3.2786220871327254	10.094886945661058	PAQR3;DUSP19;PTPRJ;CDK5RAP3
Response to Estradiol (GO:0032355)	3/15	0.0461795	0.566786	0	0	4.30028328611898	13.22431532609172	NCOA3;LCOR;STRN3
Sphingosine Metabolic Process (GO:0006670)	3/15	0.0461795	0.566786	0	0	4.30028328611898	13.22431532609172	ACER3;SPTSSB;PLPP2
Neutrophil Chemotaxis (GO:0030593)	3/15	0.0461795	0.566786	0	0	4.30028328611898	13.22431532609172	TGFB2;SYK;CLSTN1
Positive Regulation of Cell Communication (GO:0010647)	3/15	0.0461795	0.566786	0	0	4.30028328611898	13.22431532609172	CLSTN1;SOX11;ANK3
Positive Regulation of Immune System Process (GO:0002684)	3/15	0.0461795	0.566786	0	0	4.30028328611898	13.22431532609172	TGFB2;CLSTN1;MIA3
Positive Regulation of Stem Cell Proliferation (GO:2000648)	3/15	0.0461795	0.566786	0	0	4.30028328611898	13.22431532609172	SOX11;N4BP2L2;TGFBR1
Protein Localization to Synapse (GO:0035418)	3/15	0.0461795	0.566786	0	0	4.30028328611898	13.22431532609172	NLGN1;DLG1;ZDHHC15
Regulation of Wnt Signaling Pathway (GO:0030111)	9/86	0.0467803	0.567059	0	0	2.0169016697588127	6.176344540800912	SALL1;CRBN;PTK7;GPC3;SHISA2;PSEN1;CXXC4;RECK;FGFR2
Regulation of Actin Cytoskeleton Organization (GO:0032956)	9/86	0.0467803	0.567059	0	0	2.0169016697588127	6.176344540800912	CCDC88A;PGAP1;ARHGEF26;NCOA3;TAOK1;INPPL1;CELSR1;EFNA5;RHOBTB1
Collagen Fibril Organization (GO:0030199)	5/37	0.050778	0.567059	0	0	2.6908735795454546	8.019588344774201	TGFB2;COL5A1;COL14A1;COL11A2;TGFBR1
Positive Regulation of Nervous System Development (GO:0051962)	5/37	0.050778	0.567059	0	0	2.6908735795454546	8.019588344774201	NLGN3;NLGN1;CLSTN1;SLITRK5;SOX11
Embryonic Organ Development (GO:0048568)	6/49	0.0511987	0.567059	0	0	2.4042475768301963	7.145523806994975	APELA;TGFB2;SALL1;PBX3;PBX1;FGFR2
Regulation of Neuron Migration (GO:2001222)	4/26	0.0520877	0.567059	0	0	3.1293359123146356	9.246642601178953	SHTN1;MDK;CTNNA2;SOCS4
Positive Regulation of Synapse Assembly (GO:0051965)	4/26	0.0520877	0.567059	0	0	3.1293359123146356	9.246642601178953	NLGN3;NLGN1;CLSTN1;SLITRK5
Neuron Development (GO:0048666)	12/129	0.0522951	0.567059	0	0	1.7715483942169739	5.22757833248717	GPRIN2;GSK3B;TGFB2;NLGN1;OPHN1;FLRT3;TAOK1;PBX3;VPS13B;CNTN4;PBX1;CDK16
Cell Surface Receptor Protein Tyrosine Kinase Signaling Pathway (GO:0007169)	18/216	0.0525872	0.567059	0	0	1.5732140507827916	4.633559388626729	RET;TRIM71;EPHA4;GSK3B;CLSTN1;EIF2AK3;PTPRJ;EFNA5;EFS;FLRT3;AXL;NTF3;TYRO3;COL4A6;HAP1;SOS1;SOCS4;FGFR2
Negative Regulation of DNA-binding Transcription Factor Activity (GO:0043433)	9/88	0.0528386	0.567059	0	0	1.9655153707052442	5.779624223370032	TCF7L2;PTGIS;ID2;FZD6;ID1;SIRT1;CDK5RAP3;PBX1;ZNF431
DNA Strand Resection Involved in Replication Fork Processing (GO:0110025)	2/7	0.0529456	0.567059	0	0	6.874681753889675	20.201191611501685	BARD1;MRE11
ER Overload Response (GO:0006983)	2/7	0.0529456	0.567059	0	0	6.874681753889675	20.201191611501685	GSK3B;EIF2AK3
Notch Receptor Processing (GO:0007220)	2/7	0.0529456	0.567059	0	0	6.874681753889675	20.201191611501685	APH1B;PSEN1
Amyloid-Beta Formation (GO:0034205)	2/7	0.0529456	0.567059	0	0	6.874681753889675	20.201191611501685	APH1B;PSEN1
Regulation of Phagocytosis, Engulfment (GO:0060099)	2/7	0.0529456	0.567059	0	0	6.874681753889675	20.201191611501685	C3;APPL2
Regulation of Protein Acetylation (GO:1901983)	2/7	0.0529456	0.567059	0	0	6.874681753889675	20.201191611501685	TAOK1;SIRT1
Base Conversion or Substitution Editing (GO:0016553)	2/7	0.0529456	0.567059	0	0	6.874681753889675	20.201191611501685	ADARB2;APOBEC3B
Regulation of Protein Localization to Cilium (GO:1903564)	2/7	0.0529456	0.567059	0	0	6.874681753889675	20.201191611501685	CCDC88A;GSK3B
Brain Morphogenesis (GO:0048854)	2/7	0.0529456	0.567059	0	0	6.874681753889675	20.201191611501685	CTNNA2;BBS4
Retina Homeostasis (GO:0001895)	2/7	0.0529456	0.567059	0	0	6.874681753889675	20.201191611501685	POC1B;BBS4
Lymphocyte Chemotaxis (GO:0048247)	2/7	0.0529456	0.567059	0	0	6.874681753889675	20.201191611501685	CXCL12;CLSTN1
Negative Regulation of Epithelial Cell Apoptotic Process (GO:1904036)	2/7	0.0529456	0.567059	0	0	6.874681753889675	20.201191611501685	TCF7L2;MDK
Negative Regulation of Glycogen Metabolic Process (GO:0070874)	2/7	0.0529456	0.567059	0	0	6.874681753889675	20.201191611501685	GSK3B;PPP1R3B
Negative Regulation of Regulated Secretory Pathway (GO:1903306)	2/7	0.0529456	0.567059	0	0	6.874681753889675	20.201191611501685	REST;CBARP
Phosphatidylethanolamine Biosynthetic Process (GO:0006646)	2/7	0.0529456	0.567059	0	0	6.874681753889675	20.201191611501685	ETNK1;CEPT1
Positive Regulation of Macrophage Cytokine Production (GO:0060907)	2/7	0.0529456	0.567059	0	0	6.874681753889675	20.201191611501685	GPRC5B;SIRT1
Presynaptic Membrane Assembly (GO:0097105)	2/7	0.0529456	0.567059	0	0	6.874681753889675	20.201191611501685	NLGN3;NLGN1
Presynaptic Membrane Organization (GO:0097090)	2/7	0.0529456	0.567059	0	0	6.874681753889675	20.201191611501685	NLGN3;NLGN1
Regulation of Adipose Tissue Development (GO:1904177)	2/7	0.0529456	0.567059	0	0	6.874681753889675	20.201191611501685	SIRT1;SORL1
Regulation of Dendritic Spine Development (GO:0060998)	3/16	0.0545794	0.567059	0	0	3.9691653955110047	11.542726115713581	NLGN1;PTPRS;PSEN1
Amyloid Precursor Protein Metabolic Process (GO:0042982)	3/16	0.0545794	0.567059	0	0	3.9691653955110047	11.542726115713581	APH1B;ADAM10;PSEN1
Respiratory Tube Development (GO:0030323)	3/16	0.0545794	0.567059	0	0	3.9691653955110047	11.542726115713581	ZIC3;FGFR2;CCDC40
Embryonic Organ Morphogenesis (GO:0048562)	3/16	0.0545794	0.567059	0	0	3.9691653955110047	11.542726115713581	ID2;SOX11;FGFR2
Negative Regulation of Neuron Differentiation (GO:0045665)	3/16	0.0545794	0.567059	0	0	3.9691653955110047	11.542726115713581	GSK3B;REST;CNTN4
Phosphatidylethanolamine Metabolic Process (GO:0046337)	3/16	0.0545794	0.567059	0	0	3.9691653955110047	11.542726115713581	ETNK1;NAPEPLD;CEPT1
Positive Regulation of BMP Signaling Pathway (GO:0030513)	3/16	0.0545794	0.567059	0	0	3.9691653955110047	11.542726115713581	SCUBE3;NUMA1;SOX11
Pulmonary Valve Morphogenesis (GO:0003184)	3/16	0.0545794	0.567059	0	0	3.9691653955110047	11.542726115713581	TGFB2;JAG1;SLIT2
Regulation of Activin Receptor Signaling Pathway (GO:0032925)	3/16	0.0545794	0.567059	0	0	3.9691653955110047	11.542726115713581	IGSF1;ACVR2B;ACVR2A
Host-Mediated Regulation of Intestinal Microbiota Composition (GO:0048874)	1/1	0.0551105	0.567059	0	0	Infinity	Infinity	NAPEPLD
Meiotic DNA Double-Strand Break Formation (GO:0042138)	1/1	0.0551105	0.567059	0	0	Infinity	Infinity	MRE11
Neutrophil Extravasation (GO:0072672)	1/1	0.0551105	0.567059	0	0	Infinity	Infinity	CLSTN1
Olefinic Compound Biosynthetic Process (GO:0120255)	1/1	0.0551105	0.567059	0	0	Infinity	Infinity	CACNA1H
Progesterone Metabolic Process (GO:0042448)	1/1	0.0551105	0.567059	0	0	Infinity	Infinity	AKR1C3
Regulation of Heart Contraction (GO:0008016)	6/50	0.0555926	0.569877	0	0	2.3494116125695075	6.789104892539234	APELA;TGFB2;TMEM65;KCNE5;ANK2;CACNA1H
Regulation of Postsynapse Organization (GO:0099175)	4/27	0.0585862	0.591699	0	0	2.993031144002467	8.491996991321646	EPHA4;ABI2;DOCK1;ZDHHC15
Response to Amyloid-Beta (GO:1904645)	4/27	0.0585862	0.591699	0	0	2.993031144002467	8.491996991321646	GSK3B;EPHA4;SYK;PSEN1
Membrane Protein Proteolysis (GO:0033619)	4/27	0.0585862	0.591699	0	0	2.993031144002467	8.491996991321646	RET;APH1B;ERAP1;PSEN1
Negative Regulation of Epithelial to Mesenchymal Transition (GO:0010719)	4/27	0.0585862	0.591699	0	0	2.993031144002467	8.491996991321646	GSK3B;EPHA4;SPRED1;USF3
Negative Regulation of Translation (GO:0017148)	9/90	0.0593879	0.596473	0	0	1.9166666666666667	5.412025036150848	TRIM71;EPHA4;DDX6;TIA1;AGO4;EIF2AK3;IGF2BP3;IGF2BP2;TNRC6B
Negative Regulation of Macromolecule Biosynthetic Process (GO:0010558)	13/146	0.0594947	0.596473	0	0	1.6884776596664075	4.764659929450386	GSK3B;TGFB2;CITED2;ADAM10;SOX11;PSEN1;PARP14;SIRT1;RBL2;REST;ID2;ITGB8;CD46
Regulation of Cell Adhesion (GO:0030155)	10/105	0.0636509	0.618953	0	0	1.8162788946615465	5.002652527482776	RET;EPHA4;CXCL12;PODXL;MDK;ADAM10;PKP4;MIA3;PTPRJ;EFNA5
Regulation of Neural Precursor Cell Proliferation (GO:2000177)	3/17	0.0636518	0.618953	0	0	3.6853500607041685	10.15066200834644	TRIM71;MDK;ID2
Negative Regulation of Stem Cell Population Maintenance (GO:1902455)	3/17	0.0636518	0.618953	0	0	3.6853500607041685	10.15066200834644	ARID4B;SINHCAF;OGT
Regulation of Stem Cell Population Maintenance (GO:2000036)	6/52	0.0650423	0.618953	0	0	2.2468922011256107	6.14012249188621	REST;NCOA3;ARID4A;ARID4B;SINHCAF;OGT
T Cell Differentiation (GO:0030217)	4/28	0.0654955	0.618953	0	0	2.8680851063829786	7.817753031979902	LEPROT;CHD7;CLSTN1;RABL3
Regulation of Peptidyl-Tyrosine Phosphorylation (GO:0050730)	4/28	0.0654955	0.618953	0	0	2.8680851063829786	7.817753031979902	RAP2C;PGAP1;EFNA5;THBS4
Cortical Cytoskeleton Organization (GO:0030865)	4/28	0.0654955	0.618953	0	0	2.8680851063829786	7.817753031979902	NLGN1;DLG1;NCOA3;RHOBTB1
Neuron Projection Development (GO:0031175)	14/163	0.0660962	0.618953	0	0	1.6232726570421516	4.409852885411893	EPHA4;GSK3B;NLGN1;ADGRV1;VPS13B;SHTN1;GPRIN2;OPHN1;FLRT3;NTF3;CNTN4;PPP1R12B;ATP9A;CDK16
Blood Vessel Morphogenesis (GO:0048514)	5/40	0.0671165	0.618953	0	0	2.4596185064935066	6.644231078969926	APELA;SYK;ID1;ITGB8;TGFBR1
Fatty Acid Biosynthetic Process (GO:0006633)	5/40	0.0671165	0.618953	0	0	2.4596185064935066	6.644231078969926	ACSM3;ABHD3;MLYCD;ACACB;CBR4
Glycerophospholipid Metabolic Process (GO:0006650)	5/40	0.0671165	0.618953	0	0	2.4596185064935066	6.644231078969926	PLCB4;ABHD3;PLCL2;GPCPD1;PLA2G7
Negative Regulation of ERK1 and ERK2 Cascade (GO:0070373)	5/40	0.0671165	0.618953	0	0	2.4596185064935066	6.644231078969926	EPHA4;SPRED1;DLG1;LMO3;DUSP6
Regulation of Glycogen Metabolic Process (GO:0070873)	2/8	0.068069	0.618953	0	0	5.728429985855729	15.393625732858819	PPP1R3C;PPP1R3B
Regulation of Leukocyte Adhesion to Vascular Endothelial Cell (GO:1904994)	2/8	0.068069	0.618953	0	0	5.728429985855729	15.393625732858819	FUT9;MDK
T Cell Activation Involved in Immune Response (GO:0002286)	2/8	0.068069	0.618953	0	0	5.728429985855729	15.393625732858819	MDK;SEMA6D
Regulation of Leukocyte Tethering or Rolling (GO:1903236)	2/8	0.068069	0.618953	0	0	5.728429985855729	15.393625732858819	CXCL12;FUT9
Regulation of Muscle System Process (GO:0090257)	2/8	0.068069	0.618953	0	0	5.728429985855729	15.393625732858819	MYL5;PPP1R12B
Astral Microtubule Organization (GO:0030953)	2/8	0.068069	0.618953	0	0	5.728429985855729	15.393625732858819	DLG1;NUMA1
Cardiolipin Metabolic Process (GO:0032048)	2/8	0.068069	0.618953	0	0	5.728429985855729	15.393625732858819	HADHA;TAMM41
Regulation of Transforming Growth Factor Beta Production (GO:0071634)	2/8	0.068069	0.618953	0	0	5.728429985855729	15.393625732858819	TGFB2;CD46
Dendrite Self-Avoidance (GO:0070593)	2/8	0.068069	0.618953	0	0	5.728429985855729	15.393625732858819	CNTN4;EMB
Ear Morphogenesis (GO:0042471)	2/8	0.068069	0.618953	0	0	5.728429985855729	15.393625732858819	CHD7;FGFR2
Tertiary Alcohol Metabolic Process (GO:1902644)	2/8	0.068069	0.618953	0	0	5.728429985855729	15.393625732858819	AKR1C3;CBR4
Negative Regulation of Nervous System Development (GO:0051961)	2/8	0.068069	0.618953	0	0	5.728429985855729	15.393625732858819	REST;SORL1
Positive Regulation of Keratinocyte Differentiation (GO:0045618)	2/8	0.068069	0.618953	0	0	5.728429985855729	15.393625732858819	NUMA1;NCOA3
Positive Regulation of Monocyte Chemotaxis (GO:0090026)	2/8	0.068069	0.618953	0	0	5.728429985855729	15.393625732858819	CXCL12;PLA2G7
Regulation of ER to Golgi Vesicle-Mediated Transport (GO:0060628)	2/8	0.068069	0.618953	0	0	5.728429985855729	15.393625732858819	PGAP1;SORL1
Regulation of Astrocyte Differentiation (GO:0048710)	2/8	0.068069	0.618953	0	0	5.728429985855729	15.393625732858819	EPHA4;ID2
Enzyme-Linked Receptor Protein Signaling Pathway (GO:0007167)	8/79	0.0687543	0.621058	0	0	1.9424966345864056	5.200482982620624	RET;EFS;AXL;NTF3;TYRO3;IL6ST;ACVR2B;ACVR2A
Positive Regulation of Vasculature Development (GO:1904018)	8/79	0.0687543	0.621058	0	0	1.9424966345864056	5.200482982620624	APELA;CXCL12;PTGIS;CLSTN1;ITGB8;SIRT1;TGFBR1;HIPK2
Connective Tissue Development (GO:0061448)	4/29	0.0728089	0.645115	0	0	2.75313475177305	7.212985790994054	COL11A2;CREB3L2;ITGB8;VPS13B
Positive Regulation of Lymphocyte Differentiation (GO:0045621)	4/29	0.0728089	0.645115	0	0	2.75313475177305	7.212985790994054	SYK;MDK;AXL;ARID2
Actin Polymerization or Depolymerization (GO:0008154)	5/41	0.0731398	0.645115	0	0	2.391098484848485	6.253638683898115	PREX1;ABI2;WIPF1;MICAL1;EVL
Regulation of Neurogenesis (GO:0050767)	5/41	0.0731398	0.645115	0	0	2.391098484848485	6.253638683898115	REST;HLTF;SOX11;SORL1;APPL2
Regulation of Muscle Contraction (GO:0006937)	3/18	0.0733689	0.645115	0	0	3.4393767705382436	8.984531527809658	MYL5;TNNI1;PPP1R12B
Natural Killer Cell Activation (GO:0030101)	3/18	0.0733689	0.645115	0	0	3.4393767705382436	8.984531527809658	CLSTN1;RABL3;PBX1
Negative Regulation of Response to Wounding (GO:1903035)	3/18	0.0733689	0.645115	0	0	3.4393767705382436	8.984531527809658	EPHA4;PTPRS;MDK
Neutrophil Migration (GO:1990266)	3/18	0.0733689	0.645115	0	0	3.4393767705382436	8.984531527809658	TGFB2;SYK;CLSTN1
Negative Regulation of MAPK Cascade (GO:0043409)	9/94	0.0739901	0.645115	0	0	1.8258655462184874	4.75423211392683	EPHA4;DLG1;SPRED1;LMO3;PAQR3;DUSP19;PTPRJ;CDK5RAP3;DUSP6
- Reg of Transmembrane Receptor Prot Serine/Threonine Kinase Sgnlng Pway (GO:0090101)	9/94	0.0739901	0.645115	0	0	1.8258655462184874	4.75423211392683	SPRED1;IGSF1;ARID4A;ARID4B;SINHCAF;OGT;SIRT1;SORL1;HIPK2
Regulation of Macromolecule Biosynthetic Process (GO:0010556)	10/108	0.0740103	0.645115	0	0	1.7602405769174623	4.582875524248584	TOM1L1;HNRNPDL;CHD7;RABL3;CHD6;ZNF711;PSEN1;AFF4;TGFBR1;KDM6A
Regulation of Actin Filament-Based Process (GO:0032970)	8/81	0.0771963	0.67075	0	0	1.888964883825455	4.838400613128943	CCDC88A;PGAP1;ARHGEF26;NCOA3;TAOK1;CELSR1;EFNA5;RHOBTB1
Kidney Development (GO:0001822)	5/42	0.0794478	0.683461	0	0	2.326282248157248	5.891670173007696	TGFB2;SALL1;IFT27;CEP290;TGFBR1
Positive Regulation of Actin Filament Polymerization (GO:0030838)	4/30	0.0805181	0.683461	0	0	2.647026732133115	6.66858327369616	FCHSD1;FCHSD2;EVL;PFN2
Regulation of Ruffle Assembly (GO:1900027)	3/19	0.0836998	0.683461	0	0	3.2241501416430594	7.997564098538463	NLGN1;EVL;PFN2
Pulmonary Valve Development (GO:0003177)	3/19	0.0836998	0.683461	0	0	3.2241501416430594	7.997564098538463	TGFB2;JAG1;SLIT2
Regulation of Lymphocyte Migration (GO:2000401)	2/9	0.0844026	0.683461	0	0	4.909678722974339	12.137498650596775	MIA3;SLC8B1
Regulation of Mesenchymal Stem Cell Differentiation (GO:2000739)	2/9	0.0844026	0.683461	0	0	4.909678722974339	12.137498650596775	GSK3B;REST
Adaptive Imm Resp Based on Som Recomb of Imm Rcptrs Built Frm IgSF Domains (GO:0002460)	2/9	0.0844026	0.683461	0	0	4.909678722974339	12.137498650596775	JAG1;CD46
Aggrephagy (GO:0035973)	2/9	0.0844026	0.683461	0	0	4.909678722974339	12.137498650596775	MAP1LC3C;ATG4B
Regulation of Translation in Response to Endoplasmic Reticulum Stress (GO:0036490)	2/9	0.0844026	0.683461	0	0	4.909678722974339	12.137498650596775	EIF2AK3;MAP3K20
Cellular Response to Estradiol Stimulus (GO:0071392)	2/9	0.0844026	0.683461	0	0	4.909678722974339	12.137498650596775	NCOA3;LCOR
Regulation of Ventricular Cardiac Muscle Cell Action Potential (GO:0098911)	2/9	0.0844026	0.683461	0	0	4.909678722974339	12.137498650596775	DLG1;DSC3
Embryonic Digit Morphogenesis (GO:0042733)	2/9	0.0844026	0.683461	0	0	4.909678722974339	12.137498650596775	SALL1;MAP3K20
Substrate-Dependent Cell Migration (GO:0006929)	2/9	0.0844026	0.683461	0	0	4.909678722974339	12.137498650596775	SHTN1;OPHN1
Fatty Acid Homeostasis (GO:0055089)	2/9	0.0844026	0.683461	0	0	4.909678722974339	12.137498650596775	ACACB;SIRT1
Glucan Metabolic Process (GO:0044042)	2/9	0.0844026	0.683461	0	0	4.909678722974339	12.137498650596775	GSK3B;PPP1R3C
Negative Regulation of RNA Catabolic Process (GO:1902369)	2/9	0.0844026	0.683461	0	0	4.909678722974339	12.137498650596775	IGF2BP2;TENT2
Negative Regulation of Chondrocyte Differentiation (GO:0032331)	2/9	0.0844026	0.683461	0	0	4.909678722974339	12.137498650596775	TGFBR1;RFLNA
Negative Regulation of Mononuclear Cell Migration (GO:0071676)	2/9	0.0844026	0.683461	0	0	4.909678722974339	12.137498650596775	MIA3;SLIT2
Neutrophil Activation (GO:0042119)	2/9	0.0844026	0.683461	0	0	4.909678722974339	12.137498650596775	PREX1;SYK
Pharyngeal System Development (GO:0060037)	2/9	0.0844026	0.683461	0	0	4.909678722974339	12.137498650596775	TGFB2;TGFBR1
Positive Regulation of Mitochondrial Membrane Permeability (GO:0035794)	2/9	0.0844026	0.683461	0	0	4.909678722974339	12.137498650596775	GSK3B;SPG7
Proteinogenic Amino Acid Metabolic Process (GO:0170039)	2/9	0.0844026	0.683461	0	0	4.909678722974339	12.137498650596775	ASPG;RIMKLB
Regulation of Axon Regeneration (GO:0048679)	2/9	0.0844026	0.683461	0	0	4.909678722974339	12.137498650596775	EPHA4;PTPRS
Negative Regulation of Transforming Growth Factor Beta Receptor Signaling Pathway (GO:0030512)	7/69	0.0847206	0.684012	0	0	1.9450877676684128	4.801248676078776	SPRED1;ARID4A;ARID4B;SINHCAF;SIRT1;LTBP1;OGT
Regulation of Protein Phosphorylation (GO:0001932)	10/111	0.0853676	0.687209	0	0	1.7075312681482742	4.201874297702004	C3;MOB1B;PGAP1;PAQR3;NDUFS4;EIF2AK3;SLIT2;SIRT1;CDK5RAP3;ACVR2A
Positive Regulation of Intracellular Transport (GO:0032388)	5/43	0.0860371	0.690568	0	0	2.2648773923444976	5.555691516686518	PGAP1;NUMA1;ASPH;CEP290;SORL1
Positive Regulation of Ossification (GO:0045778)	4/31	0.0886134	0.701851	0	0	2.5487785657998425	6.176892990854139	ADGRV1;SOX11;ACVR2B;ACVR2A
Negative Regulation of Protein Metabolic Process (GO:0051248)	10/112	0.0893761	0.701851	0	0	1.690650509130691	4.082755745593464	TRIM71;EPHA4;DDX6;TIA1;EIF2AK3;IGF2BP3;IGF2BP2;HSPG2;SORL1;CDK5RAP3
Lipid Biosynthetic Process (GO:0008610)	6/57	0.0925138	0.701851	0	0	2.0257719019328926	4.822142518753814	ACSM3;SRD5A1;MLYCD;ACACB;CBR4;AGPAT4
Chordate Embryonic Development (GO:0043009)	5/44	0.0929033	0.701851	0	0	2.2066215034965033	5.243365198218944	TRIM71;KIAA1217;CHD7;TGFBR1;FGFR2
Negative Regulation of Metabolic Process (GO:0009892)	5/44	0.0929033	0.701851	0	0	2.2066215034965033	5.243365198218944	ARRDC3;PLCL2;ID1;ACVR2B;MAP2K6
Positive Regulation of Immune Response (GO:0050778)	5/44	0.0929033	0.701851	0	0	2.2066215034965033	5.243365198218944	TGFB2;PTPRJ;CD46;IL6ST;SIRT1
Negative Regulation of Cell Differentiation (GO:0045596)	13/157	0.0930005	0.701851	0	0	1.5580699233716475	3.7006512219719294	EPHA4;GSK3B;JAG1;ADGRV1;USF3;SIRT1;TGFBR1;SPRED1;REST;COL5A1;ID2;SINHCAF;CNTN4
Regulation of Muscle Cell Differentiation (GO:0051147)	3/20	0.0946116	0.701851	0	0	3.034244292617897	7.154672570098382	CCNT2;ID2;FGFR2
Regulation of Platelet Aggregation (GO:0090330)	3/20	0.0946116	0.701851	0	0	3.034244292617897	7.154672570098382	SYK;IL6ST;PRKG1
Cell Surface Receptor Protein Serine/Threonine Kinase Signaling Pathway (GO:0007178)	3/20	0.0946116	0.701851	0	0	3.034244292617897	7.154672570098382	ACVR2B;ACVR2A;HIPK2
Dolichol-Linked Oligosaccharide Biosynthetic Process (GO:0006488)	3/20	0.0946116	0.701851	0	0	3.034244292617897	7.154672570098382	ALG9;ALG13;ALG10B
in Utero Embryonic Development (GO:0001701)	3/20	0.0946116	0.701851	0	0	3.034244292617897	7.154672570098382	CHD7;TGFBR1;FGFR2
Nucleoside Phosphate Metabolic Process (GO:0006753)	3/20	0.0946116	0.701851	0	0	3.034244292617897	7.154672570098382	ACSM3;MLYCD;NUDT14
Positive Regulation of Notch Signaling Pathway (GO:0045747)	3/20	0.0946116	0.701851	0	0	3.034244292617897	7.154672570098382	TGFB2;JAG1;IL6ST
Negative Regulation of Plasma Membrane Bounded Cell Projection Assembly (GO:0120033)	4/32	0.0970838	0.701851	0	0	2.457548125633232	5.731447134447012	MPHOSPH9;EVL;SLIT2;PFN2
Positive Regulation of Cell-Cell Adhesion (GO:0022409)	4/32	0.0970838	0.701851	0	0	2.457548125633232	5.731447134447012	CITED2;MDK;PODXL;ANK3
Positive Regulation of Stress Fiber Assembly (GO:0051496)	4/32	0.0970838	0.701851	0	0	2.457548125633232	5.731447134447012	CCDC88A;EVL;TGFBR1;PFN2
Positive Regulation of Viral Process (GO:0048524)	4/32	0.0970838	0.701851	0	0	2.457548125633232	5.731447134447012	AXL;TYRO3;RSF1;TMEM39A
Sensory Perception of Mechanical Stimulus (GO:0050954)	6/58	0.0986566	0.701851	0	0	1.9866506182295656	4.601300758468743	COL11A2;PIEZO2;PJVK;CDC14A;CCDC50;POU3F4
Positive Regulation of Organelle Assembly (GO:1902117)	6/58	0.0986566	0.701851	0	0	1.9866506182295656	4.601300758468743	GSK3B;CCDC88A;NUMA1;SDC4;SNX30;BBS4
Regulation of Protein Localization to Nucleus (GO:1900180)	5/45	0.100041	0.701851	0	0	2.151278409090909	4.952610716805512	GSK3B;TCF7L2;EIF2AK3;GLUL;CDK5RAP3
Canonical Wnt Signaling Pathway (GO:0060070)	5/45	0.100041	0.701851	0	0	2.151278409090909	4.952610716805512	GSK3B;TCF7L2;BCL9;FZD4;FZD6
Negative Regulation of Neuron Projection Development (GO:0010977)	5/45	0.100041	0.701851	0	0	2.151278409090909	4.952610716805512	EPHA4;NLGN1;PTPRS;DPYSL3;PAQR3
Plasma Membrane Bounded Cell Projection Morphogenesis (GO:0120039)	5/45	0.100041	0.701851	0	0	2.151278409090909	4.952610716805512	SHTN1;NLGN1;NTF3;PPP1R12B;ATP9A
Protein O-linked Glycosylation (GO:0006493)	7/72	0.100818	0.701851	0	0	1.8548542625465703	4.255848227119062	GALNT12;ST6GAL1;FUT9;POMT1;OGA;TMTC1;OGT
CRD-mediated mRNA Stabilization (GO:0070934)	2/10	0.101767	0.701851	0	0	4.2956152758132955	9.815766930429577	IGF2BP3;IGF2BP2
T Cell Migration (GO:0072678)	2/10	0.101767	0.701851	0	0	4.2956152758132955	9.815766930429577	CXCL12;CLSTN1
Amyloid-Beta Metabolic Process (GO:0050435)	2/10	0.101767	0.701851	0	0	4.2956152758132955	9.815766930429577	APH1B;PSEN1
Regulation of Protein Localization to Centrosome (GO:1904779)	2/10	0.101767	0.701851	0	0	4.2956152758132955	9.815766930429577	GSK3B;CEP72
Sphingoid Biosynthetic Process (GO:0046520)	2/10	0.101767	0.701851	0	0	4.2956152758132955	9.815766930429577	ACER3;SPTSSB
Sphingosine Biosynthetic Process (GO:0046512)	2/10	0.101767	0.701851	0	0	4.2956152758132955	9.815766930429577	ACER3;SPTSSB
Glycoside Metabolic Process (GO:0016137)	2/10	0.101767	0.701851	0	0	4.2956152758132955	9.815766930429577	AKR1C3;CBR4
Icosanoid Biosynthetic Process (GO:0046456)	2/10	0.101767	0.701851	0	0	4.2956152758132955	9.815766930429577	PTGIS;AKR1C3
Kinetochore Assembly (GO:0051382)	2/10	0.101767	0.701851	0	0	4.2956152758132955	9.815766930429577	KNTC1;CENPC
Magnesium Ion Transport (GO:0015693)	2/10	0.101767	0.701851	0	0	4.2956152758132955	9.815766930429577	NIPAL2;NIPA1
Negative Regulation of Inflammasome-Mediated Signaling Pathway (GO:0141086)	2/10	0.101767	0.701851	0	0	4.2956152758132955	9.815766930429577	LAMP2;OGT
Neuron Projection Fasciculation (GO:0106030)	2/10	0.101767	0.701851	0	0	4.2956152758132955	9.815766930429577	EPHA4;CNTN4
Positive Regulation of Insulin Receptor Signaling Pathway (GO:0046628)	2/10	0.101767	0.701851	0	0	4.2956152758132955	9.815766930429577	SIRT1;SORL1
Presynapse Organization (GO:0099172)	2/10	0.101767	0.701851	0	0	4.2956152758132955	9.815766930429577	NLGN3;NLGN1
Protein Localization to Kinetochore (GO:0034501)	2/10	0.101767	0.701851	0	0	4.2956152758132955	9.815766930429577	KNTC1;BUB3
Organelle Assembly (GO:0070925)	21/284	0.104435	0.701851	0	0	1.3802778760279424	3.118304508468934	SPAG16;FBXW8;WDR19;HPS1;ARMC9;IFT80;CDC14A;PACS2;MAP1LC3C;PSPC1;TCTN2;TMEM67;CEP70;NEK1;IFT27;ATG4B;POC1B;DZIP1;IFT46;CEP290;BBS4
post-Golgi Vesicle-Mediated Transport (GO:0006892)	6/59	0.10501	0.701851	0	0	1.949005609382968	4.39247313382373	GGA1;MON2;AP1G2;VTI1A;SORL1;EXOC1
Positive Regulation of Peptidyl-Tyrosine Phosphorylation (GO:0050731)	4/33	0.105917	0.701851	0	0	2.3726094399608706	5.326746844656595	GPRC5B;EFNA5;PARP14;THBS4
Regulation of Glycogen Biosynthetic Process (GO:0005979)	3/21	0.106069	0.701851	0	0	2.865439093484419	6.429074919182951	GSK3B;PPP1R3C;PPP1R3B
Blood Circulation (GO:0008015)	3/21	0.106069	0.701851	0	0	2.865439093484419	6.429074919182951	HTR7;CXCL12;TBC1D8
Blood Vessel Endothelial Cell Migration (GO:0043534)	3/21	0.106069	0.701851	0	0	2.865439093484419	6.429074919182951	ID1;MIA3;SLIT2
Carbohydrate Derivative Catabolic Process (GO:1901136)	3/21	0.106069	0.701851	0	0	2.865439093484419	6.429074919182951	GALT;FBXO2;OGA
Development of Primary Male Sexual Characteristics (GO:0046546)	3/21	0.106069	0.701851	0	0	2.865439093484419	6.429074919182951	TGFB2;SOX15;AKR1C3
Ventricular Cardiac Muscle Tissue Morphogenesis (GO:0055010)	3/21	0.106069	0.701851	0	0	2.865439093484419	6.429074919182951	TGFB2;TGFBR1;FGFR2
Granulocyte Chemotaxis (GO:0071621)	3/21	0.106069	0.701851	0	0	2.865439093484419	6.429074919182951	TGFB2;SYK;CLSTN1
Heterophilic Cell-Cell Adhesion via Plasma Membrane Cell Adhesion Molecules (GO:0007157)	3/21	0.106069	0.701851	0	0	2.865439093484419	6.429074919182951	NLGN1;CADM3;HMCN1
Male Gonad Development (GO:0008584)	3/21	0.106069	0.701851	0	0	2.865439093484419	6.429074919182951	TGFB2;SOX15;AKR1C3
Peptidyl-Tyrosine Dephosphorylation (GO:0035335)	3/21	0.106069	0.701851	0	0	2.865439093484419	6.429074919182951	PTPRS;PTPRJ;DUSP6
Positive Regulation of Filopodium Assembly (GO:0051491)	3/21	0.106069	0.701851	0	0	2.865439093484419	6.429074919182951	DOCK11;NLGN1;DPYSL3
Regulation of Cardiac Muscle Cell Contraction (GO:0086004)	3/21	0.106069	0.701851	0	0	2.865439093484419	6.429074919182951	DLG1;ANK2;DSC3
Transforming Growth Factor Beta Receptor Superfamily Signaling Pathway (GO:0141091)	8/87	0.106072	0.701851	0	0	1.7446324419003594	3.9143152351843176	TGFB2;ID1;HIVEP1;SIRT1;ACVR2B;APPL2;TGFBR1;ACVR2A
Protein Maturation (GO:0051604)	10/116	0.106521	0.701851	0	0	1.6263125219316004	3.641984659292476	PGAP1;KEL;ADAMTS13;APH1B;MMP16;ADAM10;ATG4B;PSEN1;OGT;LMF1
Regulation of Cilium Beat Frequency (GO:0003356)	1/2	0.107188	0.701851	0	0	17.168079096045197	38.3392431385242	CCDC40
His-Purkinje System Development (GO:0003164)	1/2	0.107188	0.701851	0	0	17.168079096045197	38.3392431385242	ID2
N-acylphosphatidylethanolamine Metabolic Process (GO:0070292)	1/2	0.107188	0.701851	0	0	17.168079096045197	38.3392431385242	NAPEPLD
Regulation of Morphogenesis of a Branching Structure (GO:0060688)	1/2	0.107188	0.701851	0	0	17.168079096045197	38.3392431385242	FGFR2
Cell Surface Pattern Recognition Receptor Signaling Pathway (GO:0002752)	1/2	0.107188	0.701851	0	0	17.168079096045197	38.3392431385242	SYK
Diet Induced Thermogenesis (GO:0002024)	1/2	0.107188	0.701851	0	0	17.168079096045197	38.3392431385242	SORL1
Synapse Pruning (GO:0098883)	1/2	0.107188	0.701851	0	0	17.168079096045197	38.3392431385242	C3
Epithelial Cell Differentiation Involved in Kidney Development (GO:0035850)	1/2	0.107188	0.701851	0	0	17.168079096045197	38.3392431385242	SALL1
Fat-Soluble Vitamin Catabolic Process (GO:0042363)	1/2	0.107188	0.701851	0	0	17.168079096045197	38.3392431385242	CYP26A1
Intestinal Epithelial Cell Differentiation (GO:0060575)	1/2	0.107188	0.701851	0	0	17.168079096045197	38.3392431385242	IL6ST
Kidney Epithelium Development (GO:0072073)	1/2	0.107188	0.701851	0	0	17.168079096045197	38.3392431385242	SALL1
Negative Regulation of Cardiac Muscle Cell Apoptotic Process (GO:0010667)	1/2	0.107188	0.701851	0	0	17.168079096045197	38.3392431385242	MDK
Negative Regulation of Dendritic Cell Apoptotic Process (GO:2000669)	1/2	0.107188	0.701851	0	0	17.168079096045197	38.3392431385242	CXCL12
Negative Regulation of Insulin-Like Growth Factor Receptor Signaling Pathway (GO:0043569)	1/2	0.107188	0.701851	0	0	17.168079096045197	38.3392431385242	INPPL1
Negative Regulation of Monocyte Chemotaxis (GO:0090027)	1/2	0.107188	0.701851	0	0	17.168079096045197	38.3392431385242	SLIT2
Nephric Duct Morphogenesis (GO:0072178)	1/2	0.107188	0.701851	0	0	17.168079096045197	38.3392431385242	GPC3
Neurotransmitter Loading Into Synaptic Vesicle (GO:0098700)	1/2	0.107188	0.701851	0	0	17.168079096045197	38.3392431385242	SLC18A2
Positive Regulation of Cell-Cell Adhesion Mediated by Integrin (GO:0033634)	1/2	0.107188	0.701851	0	0	17.168079096045197	38.3392431385242	PODXL
Positive Regulation of Monocyte Chemotactic Protein-1 Production (GO:0071639)	1/2	0.107188	0.701851	0	0	17.168079096045197	38.3392431385242	SYK
Protein Import (GO:0017038)	1/2	0.107188	0.701851	0	0	17.168079096045197	38.3392431385242	LAMP2
Endoplasmic Reticulum Organization (GO:0007029)	5/46	0.107446	0.701859	0	0	2.098634977827051	4.68157114610808	SHTN1;ATL3;EIF2AK3;MIA3;SPTSSB
Sensory Perception of Sound (GO:0007605)	6/60	0.111571	0.702299	0	0	1.912754860123281	4.1948585558125275	REST;COL11A2;PJVK;CDC14A;CCDC50;POU3F4
Endocytic Recycling (GO:0032456)	6/60	0.111571	0.702299	0	0	1.912754860123281	4.1948585558125275	STX16;RAB12;VTI1A;VPS13B;SNX30;VPS39
Cell Junction Assembly (GO:0034329)	7/74	0.112412	0.702299	0	0	1.7991878215758812	3.9322760450882304	NLGN3;FARP1;NLGN1;OPHN1;FLRT3;PKP4;ADGRL3
Response to Retinoic Acid (GO:0032526)	4/34	0.115099	0.702299	0	0	2.2933333333333334	4.958091372940728	RET;GSK3B;FZD4;PTK7
Non-Canonical Wnt Signaling Pathway (GO:0035567)	4/34	0.115099	0.702299	0	0	2.2933333333333334	4.958091372940728	FZD4;TMEM67;FZD6;CELSR1
Regulation of Axon Extension (GO:0030516)	4/34	0.115099	0.702299	0	0	2.2933333333333334	4.958091372940728	GSK3B;SHTN1;PTPRS;SEMA6D
GPI Anchor Biosynthetic Process (GO:0006506)	3/22	0.118037	0.702299	0	0	2.7144028626807812	5.800013863566807	PGAP1;PIGN;PIGM
GPI Anchor Metabolic Process (GO:0006505)	3/22	0.118037	0.702299	0	0	2.7144028626807812	5.800013863566807	PGAP1;PIGN;PIGM
Regulatory ncRNA-mediated Post-Transcriptional Gene Silencing (GO:0035194)	3/22	0.118037	0.702299	0	0	2.7144028626807812	5.800013863566807	MOV10;AGO4;TNRC6B
Sulfur Compound Catabolic Process (GO:0044273)	3/22	0.118037	0.702299	0	0	2.7144028626807812	5.800013863566807	SUCLG2;MLYCD;GNS
Fibroblast Growth Factor Receptor Signaling Pathway (GO:0008543)	3/22	0.118037	0.702299	0	0	2.7144028626807812	5.800013863566807	TRIM71;FLRT3;FGFR2
Protein Targeting to Lysosome (GO:0006622)	3/22	0.118037	0.702299	0	0	2.7144028626807812	5.800013863566807	ZFYVE16;LAMP2;SORL1
Regulation of Calcium Ion Transmembrane Transport (GO:1903169)	3/22	0.118037	0.702299	0	0	2.7144028626807812	5.800013863566807	ANK2;SPG7;CBARP
Glucose Homeostasis (GO:0042593)	6/61	0.118335	0.702299	0	0	1.8778223199275832	4.0077209373069005	TCF7L2;LEPROT;MBD5;SIRT1;SLC8B1;APPL2
Negative Regulation of Gene Expression, Epigenetic (GO:0045814)	7/75	0.118462	0.702299	0	0	1.7725825372884196	3.7812107991187447	MOV10;MTF2;LRIF1;ZNF445;SMARCA1;SIRT1;APOBEC3B
Regulation of Establishment of Protein Localization (GO:0070201)	2/11	0.12	0.702299	0	0	3.818010372465818	8.095179360868592	SPIDR;CEP290
T Cell Mediated Immunity (GO:0002456)	2/11	0.12	0.702299	0	0	3.818010372465818	8.095179360868592	JAG1;CD46
Regulation of Protein Tyrosine Kinase Activity (GO:0061097)	2/11	0.12	0.702299	0	0	3.818010372465818	8.095179360868592	RAP2C;GPRC5B
Thioester Metabolic Process (GO:0035383)	2/11	0.12	0.702299	0	0	3.818010372465818	8.095179360868592	ACSM3;MLYCD
Mesenchyme Development (GO:0060485)	2/11	0.12	0.702299	0	0	3.818010372465818	8.095179360868592	TGFBR1;FGFR2
Myoblast Fusion (GO:0007520)	2/11	0.12	0.702299	0	0	3.818010372465818	8.095179360868592	DOCK1;CACNA1H
Photoreceptor Cell Development (GO:0042461)	2/11	0.12	0.702299	0	0	3.818010372465818	8.095179360868592	DZANK1;CEP290
Positive Regulation of Cellular Response to Insulin Stimulus (GO:1900078)	2/11	0.12	0.702299	0	0	3.818010372465818	8.095179360868592	SIRT1;SORL1
Positive Regulation of Hippo Signaling (GO:0035332)	2/11	0.12	0.702299	0	0	3.818010372465818	8.095179360868592	ARRDC3;SOX11
Positive Regulation of Immune Effector Process (GO:0002699)	2/11	0.12	0.702299	0	0	3.818010372465818	8.095179360868592	CD46;APPL2
Positive Regulation of Neuron Migration (GO:2001224)	2/11	0.12	0.702299	0	0	3.818010372465818	8.095179360868592	SHTN1;MDK
Positive Regulation of Positive Chemotaxis (GO:0050927)	2/11	0.12	0.702299	0	0	3.818010372465818	8.095179360868592	CXCL12;NTF3
Purine-Containing Compound Catabolic Process (GO:0072523)	2/11	0.12	0.702299	0	0	3.818010372465818	8.095179360868592	SUCLG2;MLYCD
Regulation of B Cell Differentiation (GO:0045577)	2/11	0.12	0.702299	0	0	3.818010372465818	8.095179360868592	SYK;ID2
Regulation of Actin Filament Organization (GO:0110053)	2/11	0.12	0.702299	0	0	3.818010372465818	8.095179360868592	CXCL12;INPPL1
Regulation of Adaptive Immune Response (GO:0002819)	2/11	0.12	0.702299	0	0	3.818010372465818	8.095179360868592	IL6ST;SIRT1
Actin Filament Organization (GO:0007015)	10/119	0.120534	0.702299	0	0	1.5811578795395782	3.345449103938413	TMOD1;DLG1;ABI2;WIPF1;NCOA3;DPYSL3;INPPL1;EVL;RHOBTB1;RFLNA
Positive Regulation of Cellular Process (GO:0048522)	29/419	0.121377	0.702299	0	0	1.286628959276018	2.7133114572848154	GSK3B;LEPROT;PGAP1;MYRF;NUMA1;CITED2;PTPRJ;TCIRG1;C3;RPS6KA3;MDK;NTF3;CPAMD8;MAP3K20;ARID2;EPHA4;TGFB2;CNBP;AKR1C3;TBC1D8;ADAM10;SIRT1;TGFBR1;REST;CXCL12;ACER3;SINHCAF;IL6ST;FGFR2
Positive Regulation of Endocytosis (GO:0045807)	5/48	0.123027	0.702299	0	0	2.0006937103594082	4.1921604672267225	C3;NLGN1;AXL;GPC3;PTPRJ
Regulation of Cold-Induced Thermogenesis (GO:0120161)	9/105	0.124588	0.702299	0	0	1.6151785714285714	3.3640040359687746	LEPROT;SYK;ARRDC3;ID1;PLCL2;OGT;ACVR2B;APPL2;MAP2K6
Regulation of Trans-Synaptic Signaling (GO:0099177)	4/35	0.124617	0.702299	0	0	2.2191718142301533	4.621441689425031	NLGN3;NLGN1;NTF3;DLGAP1
Artery Morphogenesis (GO:0048844)	3/23	0.130478	0.702299	0	0	2.578470254957507	5.251181778290147	TGFB2;JAG1;TGFBR1
Embryonic Limb Morphogenesis (GO:0030326)	3/23	0.130478	0.702299	0	0	2.578470254957507	5.251181778290147	TGFB2;SALL1;MAP3K20
Negative Regulation of Proteolysis Involved in Protein Catabolic Process (GO:1903051)	3/23	0.130478	0.702299	0	0	2.578470254957507	5.251181778290147	EPHA4;OPHN1;HIPK2
Positive Regulation of Erythrocyte Differentiation (GO:0045648)	3/23	0.130478	0.702299	0	0	2.578470254957507	5.251181778290147	MIA3;GLUL;ACVR2A
Positive Regulation of Signal Transduction by P53 Class Mediator (GO:1901798)	3/23	0.130478	0.702299	0	0	2.578470254957507	5.251181778290147	SPRED1;CHD6;CDK5RAP3
Positive Regulation of Substrate Adhesion-Dependent Cell Spreading (GO:1900026)	3/23	0.130478	0.702299	0	0	2.578470254957507	5.251181778290147	MDK;NCOA3;DOCK1
Regulation of Cardiac Muscle Cell Action Potential (GO:0098901)	3/23	0.130478	0.702299	0	0	2.578470254957507	5.251181778290147	DLG1;ANK2;DSC3
Regulation of Cation Channel Activity (GO:2001257)	3/23	0.130478	0.702299	0	0	2.578470254957507	5.251181778290147	ASPH;ANK2;ANK3
T Cell Activation (GO:0042110)	5/49	0.131189	0.702299	0	0	1.9550619834710743	3.9709576124952406	LEPROT;MDK;CLSTN1;CHD7;SOS1
Positive Regulation of Cell Junction Assembly (GO:1901890)	5/49	0.131189	0.702299	0	0	1.9550619834710743	3.9709576124952406	NLGN3;NLGN1;CLSTN1;SLITRK5;PTPRJ
Cardiac Conduction (GO:0061337)	4/36	0.134455	0.702299	0	0	2.149645390070922	4.3133107658111225	TMEM65;KCNE5;ANK2;DSC3
Cellular Response to Metal Ion (GO:0071248)	7/78	0.13759	0.702299	0	0	1.6972633521929297	3.366479827554524	NLGN1;ADGRV1;ASPH;ZNF658;AKR1C3;ANK3;CACNA1H
Regulation of Exit From Mitosis (GO:0007096)	2/12	0.138953	0.702299	0	0	3.435926449787836	6.781200980400073	KNTC1;CDC14A
acyl-CoA Biosynthetic Process (GO:0071616)	2/12	0.138953	0.702299	0	0	3.435926449787836	6.781200980400073	MLYCD;CBR4
Regulation of Oligodendrocyte Differentiation (GO:0048713)	2/12	0.138953	0.702299	0	0	3.435926449787836	6.781200980400073	SLC45A3;MDK
Axonal Fasciculation (GO:0007413)	2/12	0.138953	0.702299	0	0	3.435926449787836	6.781200980400073	EPHA4;CNTN4
Axonemal Dynein Complex Assembly (GO:0070286)	2/12	0.138953	0.702299	0	0	3.435926449787836	6.781200980400073	DNAH1;CCDC40
Regulation of Protein Autophosphorylation (GO:0031952)	2/12	0.138953	0.702299	0	0	3.435926449787836	6.781200980400073	MOB1B;TOM1L1
Response to Axon Injury (GO:0048678)	2/12	0.138953	0.702299	0	0	3.435926449787836	6.781200980400073	FLRT3;DPYSL3
Signaling Receptor Ligand Precursor Processing (GO:0140448)	2/12	0.138953	0.702299	0	0	3.435926449787836	6.781200980400073	BCHE;PLA2G7
Detection of Mechanical Stimulus Involved in Sensory Perception (GO:0050974)	2/12	0.138953	0.702299	0	0	3.435926449787836	6.781200980400073	REST;PIEZO2
Ventricular Cardiac Muscle Cell Action Potential (GO:0086005)	2/12	0.138953	0.702299	0	0	3.435926449787836	6.781200980400073	DLG1;KCNE5
Microvillus Organization (GO:0032528)	2/12	0.138953	0.702299	0	0	3.435926449787836	6.781200980400073	RAP2C;STK26
Negative Regulation of Axon Extension (GO:0030517)	2/12	0.138953	0.702299	0	0	3.435926449787836	6.781200980400073	PTPRS;SEMA6D
Negative Regulation of Endopeptidase Activity (GO:0010951)	2/12	0.138953	0.702299	0	0	3.435926449787836	6.781200980400073	SERPINB9;RECK
Negative Regulation of Peptidase Activity (GO:0010466)	2/12	0.138953	0.702299	0	0	3.435926449787836	6.781200980400073	TIMP2;SERPINB9
Negative Regulation of Vascular Permeability (GO:0043116)	2/12	0.138953	0.702299	0	0	3.435926449787836	6.781200980400073	PTPRJ;SLIT2
Oligosaccharide Biosynthetic Process (GO:0009312)	2/12	0.138953	0.702299	0	0	3.435926449787836	6.781200980400073	FUT9;ST6GALNAC5
p38MAPK Cascade (GO:0038066)	2/12	0.138953	0.702299	0	0	3.435926449787836	6.781200980400073	MAP3K20;MAP2K6
Positive Regulation of Epidermal Cell Differentiation (GO:0045606)	2/12	0.138953	0.702299	0	0	3.435926449787836	6.781200980400073	NUMA1;NCOA3
Positive Regulation of Granulocyte Chemotaxis (GO:0071624)	2/12	0.138953	0.702299	0	0	3.435926449787836	6.781200980400073	MDK;THBS4
+ Reg of Myeloid Leukocyte Cytokine Production Inv in Imm Resp (GO:0061081)	2/12	0.138953	0.702299	0	0	3.435926449787836	6.781200980400073	GPRC5B;SIRT1
Positive Regulation of Neutrophil Chemotaxis (GO:0090023)	2/12	0.138953	0.702299	0	0	3.435926449787836	6.781200980400073	MDK;THBS4
Postsynaptic Membrane Organization (GO:0001941)	2/12	0.138953	0.702299	0	0	3.435926449787836	6.781200980400073	NLGN3;NLGN1
Presynapse Assembly (GO:0099054)	2/12	0.138953	0.702299	0	0	3.435926449787836	6.781200980400073	NLGN3;NLGN1
Regulation of Amyloid Fibril Formation (GO:1905906)	2/12	0.138953	0.702299	0	0	3.435926449787836	6.781200980400073	PSEN1;HSPG2
Regulation of Behavior (GO:0050795)	2/12	0.138953	0.702299	0	0	3.435926449787836	6.781200980400073	LEPROT;MBD5
Regulation of Brown Fat Cell Differentiation (GO:0090335)	2/12	0.138953	0.702299	0	0	3.435926449787836	6.781200980400073	NAPEPLD;SIRT1
Regulation of Carbohydrate Metabolic Process (GO:0006109)	2/12	0.138953	0.702299	0	0	3.435926449787836	6.781200980400073	MLYCD;SIRT1
Regulation of Signal Transduction by P53 Class Mediator (GO:1901796)	5/50	0.139589	0.702299	0	0	1.9114583333333333	3.7637675035384697	CHD6;SIRT1;CDK5RAP3;MAP2K6;HIPK2
Nucleotide-Excision Repair (GO:0006289)	5/50	0.139589	0.702299	0	0	1.9114583333333333	3.7637675035384697	SLC30A9;BRIP1;UVSSA;SIRT1;FAN1
Positive Regulation of Intracellular Signal Transduction (GO:1902533)	31/460	0.142589	0.702299	0	0	1.2498607587103163	2.4344621105260327	RET;NLGN1;CITED2;SLC44A2;DUSP19;CHD6;PTPRJ;EFNA5;NTF3;CDK5RAP3;EPHA4;TCF7L2;TGFB2;ADGRV1;PTGIS;LMO3;ARRDC3;PAQR3;AKR1C3;SOX11;SIRT1;TGFBR1;ACVR2A;CCDC88A;GPRC5B;RRAGB;AXL;TRAF5;TYRO3;SOS1;FGFR2
Regulation of Response to Biotic Stimulus (GO:0002831)	3/24	0.143355	0.702299	0	0	2.4554836098745447	4.7696103598002475	ELMOD2;ERAP1;APPL2
Regulation of Stress-Activated MAPK Cascade (GO:0032872)	3/24	0.143355	0.702299	0	0	2.4554836098745447	4.7696103598002475	TGFB2;TAOK1;SEMA4C
Inorganic Anion Transport (GO:0015698)	3/24	0.143355	0.702299	0	0	2.4554836098745447	4.7696103598002475	CLCN5;TTYH1;CLCNKB
Mitotic Cell Cycle Checkpoint Signaling (GO:0007093)	3/24	0.143355	0.702299	0	0	2.4554836098745447	4.7696103598002475	BARD1;MRE11;CDK5RAP3
Positive Regulation of Carbohydrate Metabolic Process (GO:0045913)	3/24	0.143355	0.702299	0	0	2.4554836098745447	4.7696103598002475	SLC45A3;MIA3;PSEN1
Regulation of Epithelial Cell Migration (GO:0010632)	4/37	0.144598	0.702299	0	0	2.084332688588008	4.030674688804306	TGFB2;EVL;DOCK1;PFN2
- Reg of Phosphatidylinositol 3-Kinase/Prot Kinase B Signal Transduction (GO:0051898)	4/37	0.144598	0.702299	0	0	2.084332688588008	4.030674688804306	USP49;PTPRJ;SIRT1;OTUD3
Cellular Response to Hormone Stimulus (GO:0032870)	5/51	0.148217	0.702299	0	0	1.8697504940711462	3.5694982859330673	NCOA3;AKR1C3;SERPINB9;SLIT2;CACNA1H
Regulation of Cell-Matrix Adhesion (GO:0001952)	5/51	0.148217	0.702299	0	0	1.8697504940711462	3.5694982859330673	GSK3B;PGAP1;JAG1;PEAK1;EFNA5
Regulation of Canonical Wnt Signaling Pathway (GO:0060828)	13/171	0.149652	0.702299	0	0	1.4183580678015422	2.694090948718744	TLE4;GSK3B;TCF7L2;FZD6;USP34;PSEN1;GPRC5B;PTK7;TBL1XR1;MDK;GPC3;RECK;FGFR2
Positive Regulation of Cell Projection Organization (GO:0031346)	8/95	0.152551	0.702299	0	0	1.5831570662600227	2.976739024834934	RET;FBXW8;FUT9;FZD4;PTK7;MDK;DPYSL3;SLIT2
Chromatin Remodeling (GO:0006338)	17/235	0.152771	0.702299	0	0	1.3452961764861855	2.527562669376054	BARD1;PHC1;MRE11;SATB1;USP3;CHD7;ATRX;CHD6;RSF1;SMARCA1;SIRT1;HIPK2;REST;MTF2;ARID2;MTA3;KDM6A
Regulation of Hippo Signaling (GO:0035330)	4/38	0.155029	0.702299	0	0	2.0228619107217356	3.770900170788516	ARRDC3;SOX11;SIRT1;STRN3
Regulation of Substrate Adhesion-Dependent Cell Spreading (GO:1900024)	4/38	0.155029	0.702299	0	0	2.0228619107217356	3.770900170788516	MDK;NCOA3;EFNA5;DOCK1
Phosphatidylcholine Metabolic Process (GO:0046470)	4/38	0.155029	0.702299	0	0	2.0228619107217356	3.770900170788516	SLC44A2;ABHD3;CEPT1;PLA2G7
Positive Regulation of Actin Filament Bundle Assembly (GO:0032233)	4/38	0.155029	0.702299	0	0	2.0228619107217356	3.770900170788516	CCDC88A;EVL;TGFBR1;PFN2
Regulation of Cilium Movement (GO:0003352)	1/3	0.156399	0.702299	0	0	8.583333333333334	15.925031802509286	CCDC40
Regulation of Circadian Sleep/Wake Cycle (GO:0042749)	1/3	0.156399	0.702299	0	0	8.583333333333334	15.925031802509286	PER3
Regulation of Complement Activation, Classical Pathway (GO:0030450)	1/3	0.156399	0.702299	0	0	8.583333333333334	15.925031802509286	CD46
Regulation of Complement-Dependent Cytotoxicity (GO:1903659)	1/3	0.156399	0.702299	0	0	8.583333333333334	15.925031802509286	TGFB2
B Cell Chemotaxis (GO:0035754)	1/3	0.156399	0.702299	0	0	8.583333333333334	15.925031802509286	CLSTN1
C21-steroid Hormone Biosynthetic Process (GO:0006700)	1/3	0.156399	0.702299	0	0	8.583333333333334	15.925031802509286	CACNA1H
Regulation of Growth Hormone Secretion (GO:0060123)	1/3	0.156399	0.702299	0	0	8.583333333333334	15.925031802509286	CHD7
L-ornithine Transmembrane Transport (GO:1903352)	1/3	0.156399	0.702299	0	0	8.583333333333334	15.925031802509286	SLC25A29
Regulation of Macrophage Apoptotic Process (GO:2000109)	1/3	0.156399	0.702299	0	0	8.583333333333334	15.925031802509286	SIRT1
Adenosine to Inosine Editing (GO:0006382)	1/3	0.156399	0.702299	0	0	8.583333333333334	15.925031802509286	ADARB2
Regulation of Monocyte Chemotactic Protein-1 Production (GO:0071637)	1/3	0.156399	0.702299	0	0	8.583333333333334	15.925031802509286	SYK
Amino-Acid Betaine Transport (GO:0015838)	1/3	0.156399	0.702299	0	0	8.583333333333334	15.925031802509286	SLC25A29
Regulation of Non-Motile Cilium Assembly (GO:1902855)	1/3	0.156399	0.702299	0	0	8.583333333333334	15.925031802509286	HAP1
Regulation of Prostaglandin Biosynthetic Process (GO:0031392)	1/3	0.156399	0.702299	0	0	8.583333333333334	15.925031802509286	SIRT1
Regulation of Respiratory Burst (GO:0060263)	1/3	0.156399	0.702299	0	0	8.583333333333334	15.925031802509286	NOXA1
Regulation of Retrograde Transport, Endosome to Golgi (GO:1905279)	1/3	0.156399	0.702299	0	0	8.583333333333334	15.925031802509286	ATP9A
Cell Differentiation Involved in Metanephros Development (GO:0072202)	1/3	0.156399	0.702299	0	0	8.583333333333334	15.925031802509286	SALL1
Cell Migration Involved in Heart Development (GO:0060973)	1/3	0.156399	0.702299	0	0	8.583333333333334	15.925031802509286	FLRT3
Choline Metabolic Process (GO:0019695)	1/3	0.156399	0.702299	0	0	8.583333333333334	15.925031802509286	BCHE
Clearance of Foreign Intracellular DNA (GO:0044355)	1/3	0.156399	0.702299	0	0	8.583333333333334	15.925031802509286	APOBEC3B
Clearance of Foreign Intracellular Nucleic Acids (GO:0099046)	1/3	0.156399	0.702299	0	0	8.583333333333334	15.925031802509286	APOBEC3B
Defense Response to Symbiont (GO:0140546)	1/3	0.156399	0.702299	0	0	8.583333333333334	15.925031802509286	GSDMB
Dopamine Biosynthetic Process (GO:0042416)	1/3	0.156399	0.702299	0	0	8.583333333333334	15.925031802509286	TGFB2
Spleen Development (GO:0048536)	1/3	0.156399	0.702299	0	0	8.583333333333334	15.925031802509286	CITED2
Vitamin Metabolic Process (GO:0006766)	1/3	0.156399	0.702299	0	0	8.583333333333334	15.925031802509286	CYP26A1
Inhibitory Postsynaptic Potential (GO:0060080)	1/3	0.156399	0.702299	0	0	8.583333333333334	15.925031802509286	NLGN3
Leukocyte Chemotaxis Involved in Inflammatory Response (GO:0002232)	1/3	0.156399	0.702299	0	0	8.583333333333334	15.925031802509286	MDK
Lysosomal Protein Catabolic Process (GO:1905146)	1/3	0.156399	0.702299	0	0	8.583333333333334	15.925031802509286	LAMP2
Negative Regulation of Arp2/3 Complex-Mediated Actin Nucleation (GO:0034316)	1/3	0.156399	0.702299	0	0	8.583333333333334	15.925031802509286	CTNNA2
Negative Regulation of Cellular Extravasation (GO:0002692)	1/3	0.156399	0.702299	0	0	8.583333333333334	15.925031802509286	CXCL12
Negative Regulation of Complement Activation, Classical Pathway (GO:0045959)	1/3	0.156399	0.702299	0	0	8.583333333333334	15.925031802509286	CD46
Negative Regulation of Leukocyte Migration (GO:0002686)	1/3	0.156399	0.702299	0	0	8.583333333333334	15.925031802509286	SLIT2
Negative Regulation of Nervous System Process (GO:0031645)	1/3	0.156399	0.702299	0	0	8.583333333333334	15.925031802509286	EIF2AK3
Negative Regulation of Peroxisome Proliferator Activated Receptor Signaling Pathway (GO:0035359)	1/3	0.156399	0.702299	0	0	8.583333333333334	15.925031802509286	PAQR3
Negative Regulation of Retinoic Acid Receptor Signaling Pathway (GO:0048387)	1/3	0.156399	0.702299	0	0	8.583333333333334	15.925031802509286	CYP26A1
Noradrenergic Neuron Differentiation (GO:0003357)	1/3	0.156399	0.702299	0	0	8.583333333333334	15.925031802509286	SOX11
Pericardium Morphogenesis (GO:0003344)	1/3	0.156399	0.702299	0	0	8.583333333333334	15.925031802509286	FLRT3
Positive Regulation of Apoptotic Cell Clearance (GO:2000427)	1/3	0.156399	0.702299	0	0	8.583333333333334	15.925031802509286	C3
Positive Regulation of Epithelial Cell Differentiation Involved in Kidney Development (GO:2000698)	1/3	0.156399	0.702299	0	0	8.583333333333334	15.925031802509286	PROM1
Positive Regulation of Hormone Metabolic Process (GO:0032352)	1/3	0.156399	0.702299	0	0	8.583333333333334	15.925031802509286	MIA3
Positive Regulation of Potassium Ion Transmembrane Transporter Activity (GO:1901018)	1/3	0.156399	0.702299	0	0	8.583333333333334	15.925031802509286	ANK2
Regulation of NMDA Receptor Activity (GO:2000310)	1/3	0.156399	0.702299	0	0	8.583333333333334	15.925031802509286	NLGN1
Regulation of Bile Acid Metabolic Process (GO:1904251)	1/3	0.156399	0.702299	0	0	8.583333333333334	15.925031802509286	SIRT1
Regulation of Dendritic Spine Morphogenesis (GO:0061001)	3/25	0.15663	0.702299	0	0	2.3436775688900333	4.3448735436856225	EPHA4;NLGN1;ZDHHC15
Determination of Left/Right Symmetry (GO:0007368)	3/25	0.15663	0.702299	0	0	2.3436775688900333	4.3448735436856225	CITED2;ZIC3;CCDC40
Positive Regulation of Cell Division (GO:0051781)	3/25	0.15663	0.702299	0	0	2.3436775688900333	4.3448735436856225	PKP4;CDC14A;FGFR2
Primary Alcohol Metabolic Process (GO:0034308)	3/25	0.15663	0.702299	0	0	2.3436775688900333	4.3448735436856225	AKR1C3;NAPEPLD;CBR4
Cytokine-Mediated Signaling Pathway (GO:0019221)	10/126	0.156938	0.702299	0	0	1.4848798776577377	2.7498584113568696	LEPROT;CXCL12;SYK;PTPRJ;TRAF1;IL6ST;SOS1;SIRT1;APPL2;SOCS4
Regulation of Endocytic Recycling (GO:2001135)	2/13	0.158492	0.702299	0	0	3.1233123312331235	5.753295811377995	SORL1;ATP9A
G Protein-Coupled Dopamine Receptor Signaling Pathway (GO:0007212)	2/13	0.158492	0.702299	0	0	3.1233123312331235	5.753295811377995	GSK3B;GNAL
Regulation of Fatty Acid Oxidation (GO:0046320)	2/13	0.158492	0.702299	0	0	3.1233123312331235	5.753295811377995	MLYCD;APPL2
L-amino Acid Metabolic Process (GO:0170033)	2/13	0.158492	0.702299	0	0	3.1233123312331235	5.753295811377995	ASPG;RIMKLB
acetyl-CoA Metabolic Process (GO:0006084)	2/13	0.158492	0.702299	0	0	3.1233123312331235	5.753295811377995	MLYCD;ACACB
Regulation of Neuron Projection Arborization (GO:0150011)	2/13	0.158492	0.702299	0	0	3.1233123312331235	5.753295811377995	MOV10;FZD4
Regulation of Ventricular Cardiac Muscle Cell Membrane Repolarization (GO:0060307)	2/13	0.158492	0.702299	0	0	3.1233123312331235	5.753295811377995	KCNE5;ANK2
Regulation of Viral Life Cycle (GO:1903900)	2/13	0.158492	0.702299	0	0	3.1233123312331235	5.753295811377995	AXL;TYRO3
Cellular Response to Low-Density Lipoprotein Particle Stimulus (GO:0071404)	2/13	0.158492	0.702299	0	0	3.1233123312331235	5.753295811377995	SYK;MIA3
Cilium-Dependent Cell Motility (GO:0060285)	2/13	0.158492	0.702299	0	0	3.1233123312331235	5.753295811377995	DNAH3;DNAH1
Ventricular Cardiac Muscle Tissue Development (GO:0003229)	2/13	0.158492	0.702299	0	0	3.1233123312331235	5.753295811377995	ID2;FGFR2
Histone mRNA Catabolic Process (GO:0071044)	2/13	0.158492	0.702299	0	0	3.1233123312331235	5.753295811377995	XRN1;TENT2
Microvillus Assembly (GO:0030033)	2/13	0.158492	0.702299	0	0	3.1233123312331235	5.753295811377995	RAP2C;STK26
Negative Regulation of Amyloid-Beta Formation (GO:1902430)	2/13	0.158492	0.702299	0	0	3.1233123312331235	5.753295811377995	HAP1;SORL1
Negative Regulation of Epithelial Cell Migration (GO:0010633)	2/13	0.158492	0.702299	0	0	3.1233123312331235	5.753295811377995	EVL;PFN2
Negative Regulation of Smooth Muscle Cell Migration (GO:0014912)	2/13	0.158492	0.702299	0	0	3.1233123312331235	5.753295811377995	SLIT2;PRKG1
Neuron Projection Organization (GO:0106027)	2/13	0.158492	0.702299	0	0	3.1233123312331235	5.753295811377995	GSK3B;PSEN1
Neurotrophin Signaling Pathway (GO:0038179)	2/13	0.158492	0.702299	0	0	3.1233123312331235	5.753295811377995	NTF3;HAP1
Nucleobase-Containing Small Molecule Metabolic Process (GO:0055086)	2/13	0.158492	0.702299	0	0	3.1233123312331235	5.753295811377995	NME4;NUDT14
Peptide Catabolic Process (GO:0043171)	2/13	0.158492	0.702299	0	0	3.1233123312331235	5.753295811377995	ADAMTS13;ERAP1
Peptide Hormone Secretion (GO:0030072)	2/13	0.158492	0.702299	0	0	3.1233123312331235	5.753295811377995	CPAMD8;CDK16
Positive Regulation of Glycolytic Process (GO:0045821)	2/13	0.158492	0.702299	0	0	3.1233123312331235	5.753295811377995	MIA3;PSEN1
Positive Regulation of Purine Nucleotide Catabolic Process (GO:0033123)	2/13	0.158492	0.702299	0	0	3.1233123312331235	5.753295811377995	MIA3;PSEN1
pre-miRNA Processing (GO:0031054)	2/13	0.158492	0.702299	0	0	3.1233123312331235	5.753295811377995	LIN28B;AGO4
Protein Localization to Phagophore Assembly Site (GO:0034497)	2/13	0.158492	0.702299	0	0	3.1233123312331235	5.753295811377995	PACS2;ATG4B
Regulation of Cardiac Muscle Cell Proliferation (GO:0060043)	2/13	0.158492	0.702299	0	0	3.1233123312331235	5.753295811377995	TGFBR1;FGFR2
Positive Regulation of Wnt Signaling Pathway (GO:0030177)	8/96	0.15896	0.702299	0	0	1.5650369601867462	2.8782618048632993	GPRC5B;SALL1;CRBN;TBL1XR1;PTK7;USP34;GPC3;FGFR2
Regulation of Defense Response (GO:0031347)	6/67	0.162939	0.702299	0	0	1.6922789916750227	3.0704407239672764	ARMH4;PGAP1;ELMOD2;ERAP1;NR1D2;APPL2
Regulation of TOR Signaling (GO:0032006)	6/67	0.162939	0.702299	0	0	1.6922789916750227	3.0704407239672764	PREX2;GSK3B;PREX1;ARMH4;RRAGB;SIRT1
Positive Regulation of Cell Migration (GO:0030335)	18/254	0.164359	0.702299	0	0	1.3157055605975128	2.3757736396769404	RET;EPHA4;TGFB2;FZD4;SEMA6D;CLSTN1;SEMA4C;ADAM10;MIA3;TGFBR1;SHTN1;APELA;CXCL12;PODXL;MDK;NTF3;SOS1;DOCK1
Regulation of Inflammatory Response (GO:0050727)	11/143	0.165432	0.702299	0	0	1.4355300859598854	2.582794550328444	GPRC5B;ARMH4;PGAP1;PTGIS;MDK;TYRO3;NAPEPLD;NR1D2;MIA3;PLA2G7;TRIM45
DNA Recombination (GO:0006310)	4/39	0.165732	0.702299	0	0	1.964903748733536	3.5316850676905127	BARD1;RAD51B;BRIP1;MRE11
Monocarboxylic Acid Biosynthetic Process (GO:0072330)	4/39	0.165732	0.702299	0	0	1.964903748733536	3.5316850676905127	ACSM3;MLYCD;ACACB;CBR4
Positive Regulation of Cytoskeleton Organization (GO:0051495)	5/53	0.166125	0.702299	0	0	1.7915482954545454	3.2158606465227133	FCHSD1;FCHSD2;NUMA1;EVL;PFN2
GPI Anchored Protein Biosynthesis (GO:0180046)	3/26	0.170266	0.702299	0	0	2.241593792338958	3.9685058622114573	PGAP1;PIGN;PIGM
Acylglycerol Metabolic Process (GO:0006639)	3/26	0.170266	0.702299	0	0	2.241593792338958	3.9685058622114573	DGKE;SEL1L;LMF1
Cardiac Ventricle Morphogenesis (GO:0003208)	3/26	0.170266	0.702299	0	0	2.241593792338958	3.9685058622114573	TGFB2;JAG1;FGFR2
Retinoid Metabolic Process (GO:0001523)	3/26	0.170266	0.702299	0	0	2.241593792338958	3.9685058622114573	CYP26A1;CYP4V2;AKR1C3
Triglyceride Metabolic Process (GO:0006641)	3/26	0.170266	0.702299	0	0	2.241593792338958	3.9685058622114573	SEL1L;SIRT1;LMF1
Tube Closure (GO:0060606)	3/26	0.170266	0.702299	0	0	2.241593792338958	3.9685058622114573	TGFB2;SEMA4C;CELSR1
Vasculogenesis (GO:0001570)	3/26	0.170266	0.702299	0	0	2.241593792338958	3.9685058622114573	APELA;SPRED1;ITGB8
Glycosphingolipid Biosynthetic Process (GO:0006688)	3/26	0.170266	0.702299	0	0	2.241593792338958	3.9685058622114573	UGT8;FUT9;ST6GALNAC5
Monoatomic Anion Transport (GO:0006820)	3/26	0.170266	0.702299	0	0	2.241593792338958	3.9685058622114573	CLCN5;TTYH1;CLCNKB
Primary Neural Tube Formation (GO:0014020)	3/26	0.170266	0.702299	0	0	2.241593792338958	3.9685058622114573	TGFB2;SEMA4C;CELSR1
Protein Localization to Golgi Apparatus (GO:0034067)	3/26	0.170266	0.702299	0	0	2.241593792338958	3.9685058622114573	PAQR3;SORL1;ZDHHC15
Regulation of Amyloid-Beta Formation (GO:1902003)	3/26	0.170266	0.702299	0	0	2.241593792338958	3.9685058622114573	EPHA4;HAP1;SORL1
Positive Regulation of Cell Population Proliferation (GO:0008284)	22/321	0.171357	0.702299	0	0	1.269900152375945	2.2401080214175897	EPHA4;TCF7L2;LEPROT;TGFB2;PGAP1;CNBP;AKR1C3;TBC1D8;ADAM10;SOX11;TCIRG1;SIRT1;TGFBR1;MDK;SOX15;ID2;NTF3;CPAMD8;ACER3;SINHCAF;IL6ST;FGFR2
Positive Regulation of Cell Motility (GO:2000147)	13/176	0.173538	0.702299	0	0	1.3742772018898526	2.4068539583516184	RET;EPHA4;FZD4;SEMA6D;CLSTN1;SEMA4C;ADAM10;TGFBR1;CXCL12;PODXL;MDK;NTF3;SOS1
Supramolecular Fiber Organization (GO:0097435)	16/224	0.173746	0.702299	0	0	1.3262293262293263	2.3211113962854717	TMOD1;TGFB2;COL14A1;NCOA3;COL11A2;INPPL1;RHOBTB1;TGFBR1;THSD4;CCDC88A;ADAMTS14;DLG1;KIF18A;BFSP1;COL5A1;EVL
Regulation of Immune Response (GO:0050776)	5/54	0.175385	0.702299	0	0	1.7548411410018554	3.0547807822799475	TGFB2;SYK;ERAP1;INPPL1;APPL2
Regulation of BMP Signaling Pathway (GO:0030510)	5/54	0.175385	0.702299	0	0	1.7548411410018554	3.0547807822799475	SCUBE3;NUMA1;SOX11;SORL1;HIPK2
Negative Regulation of Protein Modification Process (GO:0031400)	4/40	0.176689	0.702299	0	0	1.9101654846335698	3.3110092828642563	PAQR3;SLIT2;SIRT1;CDK5RAP3
Chemical Synaptic Transmission (GO:0007268)	12/161	0.177767	0.702299	0	0	1.3873840909747432	2.396402439081635	FCHSD1;NLGN3;RPS6KA3;DLG1;HTR7;PTPRN2;FCHSD2;DLGAP1;HAP1;SLC12A7;TSPOAP1;SLC18A2
3'-UTR-mediated mRNA Destabilization (GO:0061158)	2/14	0.178495	0.702299	0	0	2.8628005657708626	4.93316388023884	TRIM71;MOV10
Regulation of Exosomal Secretion (GO:1903541)	2/14	0.178495	0.702299	0	0	2.8628005657708626	4.93316388023884	SDC4;ATP9A
Golgi to Vacuole Transport (GO:0006896)	2/14	0.178495	0.702299	0	0	2.8628005657708626	4.93316388023884	AP1G2;VTI1A
Regulation of Granulocyte Chemotaxis (GO:0071622)	2/14	0.178495	0.702299	0	0	2.8628005657708626	4.93316388023884	PGAP1;MDK
Response to Ketone (GO:1901654)	2/14	0.178495	0.702299	0	0	2.8628005657708626	4.93316388023884	TGFB2;SLIT2
Determination of Bilateral Symmetry (GO:0009855)	2/14	0.178495	0.702299	0	0	2.8628005657708626	4.93316388023884	CITED2;ZIC3
Diol Biosynthetic Process (GO:0034312)	2/14	0.178495	0.702299	0	0	2.8628005657708626	4.93316388023884	ACER3;SPTSSB
Stress-Activated MAPK Cascade (GO:0051403)	2/14	0.178495	0.702299	0	0	2.8628005657708626	4.93316388023884	MAP3K20;MAP2K6
Hormone Biosynthetic Process (GO:0042446)	2/14	0.178495	0.702299	0	0	2.8628005657708626	4.93316388023884	SRD5A1;ASMT
miRNA Metabolic Process (GO:0010586)	2/14	0.178495	0.702299	0	0	2.8628005657708626	4.93316388023884	DDX17;LIN28B
Negative Regulation of Amyloid Precursor Protein Catabolic Process (GO:1902992)	2/14	0.178495	0.702299	0	0	2.8628005657708626	4.93316388023884	HAP1;SORL1
Negative Regulation of Cation Transmembrane Transport (GO:1904063)	2/14	0.178495	0.702299	0	0	2.8628005657708626	4.93316388023884	KCNE5;CBARP
Placenta Development (GO:0001890)	2/14	0.178495	0.702299	0	0	2.8628005657708626	4.93316388023884	APELA;ITGB8
Positive Regulation of Fatty Acid Metabolic Process (GO:0045923)	2/14	0.178495	0.702299	0	0	2.8628005657708626	4.93316388023884	SLC45A3;MLYCD
Positive Regulation of Glial Cell Differentiation (GO:0045687)	2/14	0.178495	0.702299	0	0	2.8628005657708626	4.93316388023884	MDK;ID2
Positive Regulation of Interleukin-12 Production (GO:0032735)	2/14	0.178495	0.702299	0	0	2.8628005657708626	4.93316388023884	SYK;MDK
Positive Regulation of Ion Transmembrane Transporter Activity (GO:0032414)	2/14	0.178495	0.702299	0	0	2.8628005657708626	4.93316388023884	ANK2;ANK3
Positive Regulation of Regulated Secretory Pathway (GO:1903307)	2/14	0.178495	0.702299	0	0	2.8628005657708626	4.93316388023884	NLGN1;RAB3D
Prostanoid Metabolic Process (GO:0006692)	2/14	0.178495	0.702299	0	0	2.8628005657708626	4.93316388023884	PTGIS;AKR1C3
rRNA Catabolic Process (GO:0016075)	2/14	0.178495	0.702299	0	0	2.8628005657708626	4.93316388023884	SLFN13;XRN1
Regulation of Autophagosome Maturation (GO:1901096)	2/14	0.178495	0.702299	0	0	2.8628005657708626	4.93316388023884	TMEM39A;TECPR1
Regulation of Calcium Ion Transmembrane Transporter Activity (GO:1901019)	2/14	0.178495	0.702299	0	0	2.8628005657708626	4.93316388023884	ASPH;ANK2
Regulation of Cardiac Conduction (GO:1903779)	2/14	0.178495	0.702299	0	0	2.8628005657708626	4.93316388023884	TMEM65;ANK2
Regulation of Cardiac Muscle Cell Membrane Repolarization (GO:0099623)	2/14	0.178495	0.702299	0	0	2.8628005657708626	4.93316388023884	KCNE5;ANK2
Regulation of Cellular Response to Heat (GO:1900034)	2/14	0.178495	0.702299	0	0	2.8628005657708626	4.93316388023884	GSK3B;SIRT1
Regulation of Chondrocyte Differentiation (GO:0032330)	2/14	0.178495	0.702299	0	0	2.8628005657708626	4.93316388023884	MDK;TGFBR1
Macroautophagy (GO:0016236)	11/146	0.18192	0.702299	0	0	1.4032792104425342	2.391454640331576	MAP1LC3C;LAMP2;VTI1A;ATG4B;PJVK;KLHL3;TCIRG1;SNX30;OGT;VPS39;TECPR1
Plasma Membrane Bounded Cell Projection Organization (GO:0120036)	9/115	0.183164	0.702299	0	0	1.4615902964959568	2.480868129841364	GPRIN2;GSK3B;NLGN1;OPHN1;FLRT3;VPS13B;CNTN4;MNS1;CDK16
Regulatory ncRNA-mediated Gene Silencing (GO:0031047)	3/27	0.184226	0.702299	0	0	2.148016997167139	3.6335717028445815	MOV10;AGO4;TNRC6B
Release of Sequestered Calcium Ion Into Cytosol (GO:0051209)	3/27	0.184226	0.702299	0	0	2.148016997167139	3.6335717028445815	PLCB4;PLCL2;SLC8B1
Constitutive Heterochromatin Formation (GO:0140719)	3/27	0.184226	0.702299	0	0	2.148016997167139	3.6335717028445815	ATRX;LRIF1;SIRT1
Smoothened Signaling Pathway (GO:0007224)	3/27	0.184226	0.702299	0	0	2.148016997167139	3.6335717028445815	TCTN2;IFT27;HIPK2
Establishment of Protein Localization to Extracellular Region (GO:0035592)	3/27	0.184226	0.702299	0	0	2.148016997167139	3.6335717028445815	SEL1L;MIA3;LTBP1
Neural Tube Closure (GO:0001843)	3/27	0.184226	0.702299	0	0	2.148016997167139	3.6335717028445815	TGFB2;SEMA4C;CELSR1
Positive Regulation of Monoatomic Ion Transport (GO:0043270)	3/27	0.184226	0.702299	0	0	2.148016997167139	3.6335717028445815	DLG1;ANK2;ANK3
Regulation of Insulin Secretion (GO:0050796)	5/55	0.184836	0.702299	0	0	1.7196022727272726	2.903180015791826	TCF7L2;REST;EFNA5;SLC8B1;CDK16
Positive Regulation of Protein Polymerization (GO:0032273)	5/55	0.184836	0.702299	0	0	1.7196022727272726	2.903180015791826	FCHSD1;FCHSD2;NUMA1;EVL;PFN2
Fatty Acid Metabolic Process (GO:0006631)	7/85	0.1875	0.702299	0	0	1.5440499671268901	2.5847043982541726	ACBD7;PHYH;ACSM3;PCCA;MLYCD;ACACB;CBR4
Regulation of Angiogenesis (GO:0045765)	11/147	0.187581	0.702299	0	0	1.392845103657509	2.3309910144045385	APELA;TGFB2;SPRED1;PTGIS;CLSTN1;ITGB8;GLUL;HSPG2;SIRT1;THBS4;HIPK2
Carbohydrate Derivative Biosynthetic Process (GO:1901137)	4/41	0.187884	0.702299	0	0	1.8583860456200882	3.107094022980917	ALG9;FUT9;ALG13;ALG10B
Negative Regulation of Protein-Containing Complex Assembly (GO:0031333)	4/41	0.187884	0.702299	0	0	1.8583860456200882	3.107094022980917	GSK3B;LAMP2;SORL1;OGT
Regulation of Cytoskeleton Organization (GO:0051493)	9/116	0.18961	0.702299	0	0	1.4478104138851802	2.407398054351426	CCDC88A;GSK3B;PGAP1;ARHGEF26;NCOA3;TAOK1;CELSR1;EFNA5;RHOBTB1
Integrin-Mediated Signaling Pathway (GO:0007229)	5/56	0.194469	0.702299	0	0	1.685745320855615	2.7603816337491707	ADAMTS13;SYK;ITGB8;ADAM10;DOCK1
Negative Regulation of Neuron Apoptotic Process (GO:0043524)	5/56	0.194469	0.702299	0	0	1.685745320855615	2.7603816337491707	MDK;NTF3;TYRO3;IL6ST;HSPG2
Regulation of Actin Filament Polymerization (GO:0030833)	5/56	0.194469	0.702299	0	0	1.685745320855615	2.7603816337491707	FCHSD1;FCHSD2;EVL;SLIT2;PFN2
Positive Regulation of Macromolecule Biosynthetic Process (GO:0010557)	16/229	0.196331	0.702299	0	0	1.2945552100481679	2.107476607493701	GSK3B;TGFB2;CITED2;CLSTN1;EIF2AK3;ANK2;SOX11;ANK3;PSEN1;SIRT1;TGFBR1;REST;ID2;ITGB8;CD46;SOS1
Negative Regulation of G2/M Transition of Mitotic Cell Cycle (GO:0010972)	3/28	0.198473	0.702299	0	0	2.061926345609065	3.3343420079727393	BARD1;MRE11;CDK5RAP3
Negative Regulation of Cell-Cell Adhesion (GO:0022408)	3/28	0.198473	0.702299	0	0	2.061926345609065	3.3343420079727393	JAG1;PODXL;MIA3
Non-Motile Cilium Assembly (GO:1905515)	3/28	0.198473	0.702299	0	0	2.061926345609065	3.3343420079727393	RPGRIP1L;CEP290;BBS4
Positive Regulation of SMAD Protein Signal Transduction (GO:0060391)	3/28	0.198473	0.702299	0	0	2.061926345609065	3.3343420079727393	TGFB2;ACVR2A;TGFBR1
Positive Regulation of Myeloid Cell Differentiation (GO:0045639)	3/28	0.198473	0.702299	0	0	2.061926345609065	3.3343420079727393	MIA3;GLUL;ACVR2A
Positive Regulation of Phagocytosis (GO:0050766)	3/28	0.198473	0.702299	0	0	2.061926345609065	3.3343420079727393	C3;PTPRJ;APPL2
Rac Protein Signal Transduction (GO:0016601)	2/15	0.198851	0.702299	0	0	2.6423675334566425	4.2679485867331	HACE1;NCOA3
Branched-Chain Amino Acid Metabolic Process (GO:0009081)	2/15	0.198851	0.702299	0	0	2.6423675334566425	4.2679485867331	PCCA;DBT
Regulation of Smooth Muscle Cell Migration (GO:0014910)	2/15	0.198851	0.702299	0	0	2.6423675334566425	4.2679485867331	SLIT2;SORL1
Cardiac Ventricle Development (GO:0003231)	2/15	0.198851	0.702299	0	0	2.6423675334566425	4.2679485867331	SALL1;TMEM65
Cellular Response to Misfolded Protein (GO:0071218)	2/15	0.198851	0.702299	0	0	2.6423675334566425	4.2679485867331	KLHL15;DNAJB14
Renal Absorption (GO:0070293)	2/15	0.198851	0.702299	0	0	2.6423675334566425	4.2679485867331	CLCNKB;KLHL3
Response to Purine-Containing Compound (GO:0014074)	2/15	0.198851	0.702299	0	0	2.6423675334566425	4.2679485867331	ASPH;NDUFS4
Collagen Catabolic Process (GO:0030574)	2/15	0.198851	0.702299	0	0	2.6423675334566425	4.2679485867331	MMP16;MMP17
Endothelial Cell Proliferation (GO:0001935)	2/15	0.198851	0.702299	0	0	2.6423675334566425	4.2679485867331	DLG1;TGFBR1
Fatty Acid Derivative Biosynthetic Process (GO:1901570)	2/15	0.198851	0.702299	0	0	2.6423675334566425	4.2679485867331	ACSS3;CBR4
Glycerophospholipid Catabolic Process (GO:0046475)	2/15	0.198851	0.702299	0	0	2.6423675334566425	4.2679485867331	GPCPD1;PLA2G7
Heart Trabecula Morphogenesis (GO:0061384)	2/15	0.198851	0.702299	0	0	2.6423675334566425	4.2679485867331	TGFB2;TGFBR1
Lysosomal Lumen Acidification (GO:0007042)	2/15	0.198851	0.702299	0	0	2.6423675334566425	4.2679485867331	LAMP2;TCIRG1
Negative Regulation of Ossification (GO:0030279)	2/15	0.198851	0.702299	0	0	2.6423675334566425	4.2679485867331	MDK;ACVR2B
Negative Regulation of Receptor Signaling Pathway via JAK-STAT (GO:0046426)	2/15	0.198851	0.702299	0	0	2.6423675334566425	4.2679485867331	LEPROT;PARP14
Nucleoside Phosphate Catabolic Process (GO:1901292)	2/15	0.198851	0.702299	0	0	2.6423675334566425	4.2679485867331	SUCLG2;MLYCD
Positive Regulation of T Cell Migration (GO:2000406)	2/15	0.198851	0.702299	0	0	2.6423675334566425	4.2679485867331	CXCL12;ADAM10
Positive Regulation of Interleukin-10 Production (GO:0032733)	2/15	0.198851	0.702299	0	0	2.6423675334566425	4.2679485867331	SYK;CD46
Positive Regulation of Potassium Ion Transmembrane Transport (GO:1901381)	2/15	0.198851	0.702299	0	0	2.6423675334566425	4.2679485867331	KCNE5;ANK2
Positive Regulation of Synaptic Transmission, Glutamatergic (GO:0051968)	2/15	0.198851	0.702299	0	0	2.6423675334566425	4.2679485867331	NLGN3;NLGN1
Positive Regulation of Translational Initiation (GO:0045948)	2/15	0.198851	0.702299	0	0	2.6423675334566425	4.2679485867331	DAZL;SH3BGRL
Protein O-linked Mannosylation (GO:0035269)	2/15	0.198851	0.702299	0	0	2.6423675334566425	4.2679485867331	POMT1;TMTC1
Pyroptotic Inflammatory Response (GO:0070269)	2/15	0.198851	0.702299	0	0	2.6423675334566425	4.2679485867331	GSDMB;MAP3K20
Regulation of Circadian Sleep/Wake Cycle, Sleep (GO:0045187)	1/4	0.202901	0.702299	0	0	5.721751412429379	9.12639239313668	PER3
Regulation of Dendritic Cell Apoptotic Process (GO:2000668)	1/4	0.202901	0.702299	0	0	5.721751412429379	9.12639239313668	CXCL12
Regulation of Dopamine Uptake Involved in Synaptic Transmission (GO:0051584)	1/4	0.202901	0.702299	0	0	5.721751412429379	9.12639239313668	RAB3B
Regulation of Glial Cell Proliferation (GO:0060251)	1/4	0.202901	0.702299	0	0	5.721751412429379	9.12639239313668	SOX11
ISG15-protein Conjugation (GO:0032020)	1/4	0.202901	0.702299	0	0	5.721751412429379	9.12639239313668	UBE2E1
L-ascorbic Acid Metabolic Process (GO:0019852)	1/4	0.202901	0.702299	0	0	5.721751412429379	9.12639239313668	GSTO2
Regulation of Hormone Biosynthetic Process (GO:0046885)	1/4	0.202901	0.702299	0	0	5.721751412429379	9.12639239313668	MIA3
Regulation of Mesenchymal Stem Cell Proliferation (GO:1902460)	1/4	0.202901	0.702299	0	0	5.721751412429379	9.12639239313668	TGFBR1
Adenylate Cyclase-Activating Dopamine Receptor Signaling Pathway (GO:0007191)	1/4	0.202901	0.702299	0	0	5.721751412429379	9.12639239313668	GNAL
Regulation of Nephron Tubule Epithelial Cell Differentiation (GO:0072182)	1/4	0.202901	0.702299	0	0	5.721751412429379	9.12639239313668	PROM1
Androgen Biosynthetic Process (GO:0006702)	1/4	0.202901	0.702299	0	0	5.721751412429379	9.12639239313668	SRD5A1
Antigen Processing and Presentation of Endogenous Peptide Antigen via MHC Class I (GO:0019885)	1/4	0.202901	0.702299	0	0	5.721751412429379	9.12639239313668	ERAP1
Bundle of His cell-Purkinje Myocyte Adhesion Involved in Cell Communication (GO:0086073)	1/4	0.202901	0.702299	0	0	5.721751412429379	9.12639239313668	DSC3
Cardiac Muscle Cell Myoblast Differentiation (GO:0060379)	1/4	0.202901	0.702299	0	0	5.721751412429379	9.12639239313668	REST
Cardiac Muscle Cell-Cardiac Muscle Cell Adhesion (GO:0086042)	1/4	0.202901	0.702299	0	0	5.721751412429379	9.12639239313668	DSC3
Regulation of Transforming Growth Factor Beta2 Production (GO:0032909)	1/4	0.202901	0.702299	0	0	5.721751412429379	9.12639239313668	TGFB2
Cellular Response to Cold (GO:0070417)	1/4	0.202901	0.702299	0	0	5.721751412429379	9.12639239313668	EIF2AK3
Renal Filtration Cell Differentiation (GO:0061318)	1/4	0.202901	0.702299	0	0	5.721751412429379	9.12639239313668	PROM1
Response to Auditory Stimulus (GO:0010996)	1/4	0.202901	0.702299	0	0	5.721751412429379	9.12639239313668	MDK
Cellular Response to Vitamin D (GO:0071305)	1/4	0.202901	0.702299	0	0	5.721751412429379	9.12639239313668	NCOA3
Retinal Rod Cell Development (GO:0046548)	1/4	0.202901	0.702299	0	0	5.721751412429379	9.12639239313668	RPGRIP1L
Serotonin Uptake (GO:0051610)	1/4	0.202901	0.702299	0	0	5.721751412429379	9.12639239313668	SLC18A2
Short-Chain Fatty Acid Catabolic Process (GO:0019626)	1/4	0.202901	0.702299	0	0	5.721751412429379	9.12639239313668	PCCA
Small Molecule Biosynthetic Process (GO:0044283)	1/4	0.202901	0.702299	0	0	5.721751412429379	9.12639239313668	ACSS3
Endochondral Ossification (GO:0001958)	1/4	0.202901	0.702299	0	0	5.721751412429379	9.12639239313668	INPPL1
Endothelin Receptor Signaling Pathway (GO:0086100)	1/4	0.202901	0.702299	0	0	5.721751412429379	9.12639239313668	PLCB4
tRNA Decay (GO:0016078)	1/4	0.202901	0.702299	0	0	5.721751412429379	9.12639239313668	SLFN13
Epithelial Cilium Movement Involved in Determination of Left/Right Asymmetry (GO:0060287)	1/4	0.202901	0.702299	0	0	5.721751412429379	9.12639239313668	CCDC40
Galactolipid Biosynthetic Process (GO:0019375)	1/4	0.202901	0.702299	0	0	5.721751412429379	9.12639239313668	UGT8
Galactosylceramide Biosynthetic Process (GO:0006682)	1/4	0.202901	0.702299	0	0	5.721751412429379	9.12639239313668	UGT8
Ventricular Compact Myocardium Morphogenesis (GO:0003223)	1/4	0.202901	0.702299	0	0	5.721751412429379	9.12639239313668	TGFBR1
Glial Cell Migration (GO:0008347)	1/4	0.202901	0.702299	0	0	5.721751412429379	9.12639239313668	TGFB2
Glomerular Epithelial Cell Differentiation (GO:0072311)	1/4	0.202901	0.702299	0	0	5.721751412429379	9.12639239313668	PROM1
Vesicle Fusion With Golgi Apparatus (GO:0048280)	1/4	0.202901	0.702299	0	0	5.721751412429379	9.12639239313668	VTI1A
White Fat Cell Differentiation (GO:0050872)	1/4	0.202901	0.702299	0	0	5.721751412429379	9.12639239313668	SIRT1
Zinc Ion Import Across Plasma Membrane (GO:0071578)	1/4	0.202901	0.702299	0	0	5.721751412429379	9.12639239313668	SLC39A4
Hepatocyte Growth Factor Receptor Signaling Pathway (GO:0048012)	1/4	0.202901	0.702299	0	0	5.721751412429379	9.12639239313668	SOS1
Interleukin-3-Mediated Signaling Pathway (GO:0038156)	1/4	0.202901	0.702299	0	0	5.721751412429379	9.12639239313668	SYK
Ketone Biosynthetic Process (GO:0042181)	1/4	0.202901	0.702299	0	0	5.721751412429379	9.12639239313668	CACNA1H
Lens Fiber Cell Differentiation (GO:0070306)	1/4	0.202901	0.702299	0	0	5.721751412429379	9.12639239313668	MAF
Leukotriene Transport (GO:0071716)	1/4	0.202901	0.702299	0	0	5.721751412429379	9.12639239313668	ABCC6
Low-Density Lipoprotein Particle Remodeling (GO:0034374)	1/4	0.202901	0.702299	0	0	5.721751412429379	9.12639239313668	PLA2G7
Lymphocyte Migration Into Lymphoid Organs (GO:0097021)	1/4	0.202901	0.702299	0	0	5.721751412429379	9.12639239313668	RET
Maintenance of Protein Location in Extracellular Region (GO:0071694)	1/4	0.202901	0.702299	0	0	5.721751412429379	9.12639239313668	LTBP1
Mast Cell Activation Involved in Immune Response (GO:0002279)	1/4	0.202901	0.702299	0	0	5.721751412429379	9.12639239313668	CLSTN1
Mast Cell Degranulation (GO:0043303)	1/4	0.202901	0.702299	0	0	5.721751412429379	9.12639239313668	CLSTN1
Medium-Chain Fatty Acid Biosynthetic Process (GO:0051792)	1/4	0.202901	0.702299	0	0	5.721751412429379	9.12639239313668	ABHD3
Mesenchymal to Epithelial Transition (GO:0060231)	1/4	0.202901	0.702299	0	0	5.721751412429379	9.12639239313668	SALL1
Myoblast Migration (GO:0051451)	1/4	0.202901	0.702299	0	0	5.721751412429379	9.12639239313668	THBS4
Negative Regulation of Chemokine-Mediated Signaling Pathway (GO:0070100)	1/4	0.202901	0.702299	0	0	5.721751412429379	9.12639239313668	SLIT2
Negative Regulation of Glial Cell Proliferation (GO:0060253)	1/4	0.202901	0.702299	0	0	5.721751412429379	9.12639239313668	SOX11
Negative Regulation of Humoral Immune Response Mediated by Circulating Immunoglobulin (GO:0002924)	1/4	0.202901	0.702299	0	0	5.721751412429379	9.12639239313668	CD46
Negative Regulation of Lamellipodium Organization (GO:1902744)	1/4	0.202901	0.702299	0	0	5.721751412429379	9.12639239313668	SLIT2
Negative Regulation of miRNA Processing (GO:1903799)	1/4	0.202901	0.702299	0	0	5.721751412429379	9.12639239313668	LIN28B
Negative Regulation of p38MAPK Cascade (GO:1903753)	1/4	0.202901	0.702299	0	0	5.721751412429379	9.12639239313668	DLG1
Negative Regulation of Striated Muscle Cell Apoptotic Process (GO:0010664)	1/4	0.202901	0.702299	0	0	5.721751412429379	9.12639239313668	MDK
Negative Regulation of Striated Muscle Tissue Development (GO:0045843)	1/4	0.202901	0.702299	0	0	5.721751412429379	9.12639239313668	SOX15
Neurotransmitter Reuptake (GO:0098810)	1/4	0.202901	0.702299	0	0	5.721751412429379	9.12639239313668	SLC18A2
Nucleobase Catabolic Process (GO:0046113)	1/4	0.202901	0.702299	0	0	5.721751412429379	9.12639239313668	DPYSL3
Pharyngeal Arch Artery Morphogenesis (GO:0061626)	1/4	0.202901	0.702299	0	0	5.721751412429379	9.12639239313668	TGFB2
Phosphatidylglycerol Acyl-Chain Remodeling (GO:0036148)	1/4	0.202901	0.702299	0	0	5.721751412429379	9.12639239313668	SERAC1
Pituitary Gland Development (GO:0021983)	1/4	0.202901	0.702299	0	0	5.721751412429379	9.12639239313668	SALL1
Positive Regulation of Blood Pressure (GO:0045777)	1/4	0.202901	0.702299	0	0	5.721751412429379	9.12639239313668	ID2
Positive Regulation of Cardiocyte Differentiation (GO:1905209)	1/4	0.202901	0.702299	0	0	5.721751412429379	9.12639239313668	TGFB2
Positive Regulation of Keratinocyte Proliferation (GO:0010838)	1/4	0.202901	0.702299	0	0	5.721751412429379	9.12639239313668	MDK
Positive Regulation of Mesenchymal Stem Cell Proliferation (GO:1902462)	1/4	0.202901	0.702299	0	0	5.721751412429379	9.12639239313668	TGFBR1
Positive Regulation of Neurotransmitter Secretion (GO:0001956)	1/4	0.202901	0.702299	0	0	5.721751412429379	9.12639239313668	NLGN1
Positive Regulation of Phospholipase Activity (GO:0010518)	1/4	0.202901	0.702299	0	0	5.721751412429379	9.12639239313668	FGFR2
Postsynaptic Density Protein 95 Clustering (GO:0097119)	1/4	0.202901	0.702299	0	0	5.721751412429379	9.12639239313668	NLGN1
Primary Alcohol Catabolic Process (GO:0034310)	1/4	0.202901	0.702299	0	0	5.721751412429379	9.12639239313668	AKR1C3
Protection From Natural Killer Cell Mediated Cytotoxicity (GO:0042270)	1/4	0.202901	0.702299	0	0	5.721751412429379	9.12639239313668	SERPINB9
Protein Localization to Endoplasmic Reticulum Exit Site (GO:0070973)	1/4	0.202901	0.702299	0	0	5.721751412429379	9.12639239313668	MIA3
Protein Targeting to Vacuole Involved in Autophagy (GO:0071211)	1/4	0.202901	0.702299	0	0	5.721751412429379	9.12639239313668	LAMP2
Proton-Transporting V-type ATPase Complex Assembly (GO:0070070)	1/4	0.202901	0.702299	0	0	5.721751412429379	9.12639239313668	VMA21
Pyrimidine-Containing Compound Catabolic Process (GO:0072529)	1/4	0.202901	0.702299	0	0	5.721751412429379	9.12639239313668	DPYSL3
Regulation of Fc Receptor Mediated Stimulatory Signaling Pathway (GO:0060368)	1/4	0.202901	0.702299	0	0	5.721751412429379	9.12639239313668	PTPRJ
Regulation of Animal Organ Morphogenesis (GO:2000027)	1/4	0.202901	0.702299	0	0	5.721751412429379	9.12639239313668	CITED2
Regulation of Atrial Cardiac Muscle Cell Membrane Repolarization (GO:0060372)	1/4	0.202901	0.702299	0	0	5.721751412429379	9.12639239313668	KCNE5
Regulation of cGMP-mediated Signaling (GO:0010752)	1/4	0.202901	0.702299	0	0	5.721751412429379	9.12639239313668	PDE10A
Regulation of Cardiac Muscle Cell Apoptotic Process (GO:0010665)	1/4	0.202901	0.702299	0	0	5.721751412429379	9.12639239313668	MDK
Regulation of Cardiac Muscle Cell Membrane Potential (GO:0086036)	1/4	0.202901	0.702299	0	0	5.721751412429379	9.12639239313668	SLC8B1
Regulation of Cell-Cell Adhesion Mediated by Integrin (GO:0033632)	1/4	0.202901	0.702299	0	0	5.721751412429379	9.12639239313668	PODXL
Regulation of Notch Signaling Pathway (GO:0008593)	5/57	0.204272	0.702299	0	0	1.6531905594405594	2.6257673548697396	TGFB2;JAG1;CD46;IL6ST;DLK1
Negative Regulation of Inflammatory Response (GO:0050728)	6/72	0.204764	0.702299	0	0	1.5634294581663002	2.479438422721991	PTGIS;SYK;MDK;TYRO3;MIA3;TRIM45
Positive Regulation of Plasma Membrane Bounded Cell Projection Assembly (GO:0120034)	6/72	0.204764	0.702299	0	0	1.5634294581663002	2.479438422721991	GSK3B;DOCK11;CCDC88A;NLGN1;DPYSL3;BBS4
Regulation of Insulin Receptor Signaling Pathway (GO:0046626)	4/43	0.210915	0.702299	0	0	1.7627932351336606	2.743437978649843	FBXW8;SIRT1;SORL1;OGT
Mitophagy (GO:0000423)	4/43	0.210915	0.702299	0	0	1.7627932351336606	2.743437978649843	MAP1LC3C;ATG4B;SNX30;OGT
Negative Regulation of Cell Projection Organization (GO:0031345)	4/43	0.210915	0.702299	0	0	1.7627932351336606	2.743437978649843	EPHA4;PTPRS;DPYSL3;PAQR3
Cellular Response to Glucose Stimulus (GO:0071333)	3/29	0.212973	0.702299	0	0	1.982458051863151	3.066048632910084	PTPRN2;ZNF236;OGT
Mitotic G2 DNA Damage Checkpoint Signaling (GO:0007095)	3/29	0.212973	0.702299	0	0	1.982458051863151	3.066048632910084	MRE11;TAOK1;CDK5RAP3
Negative Regulation of G Protein-Coupled Receptor Signaling Pathway (GO:0045744)	3/29	0.212973	0.702299	0	0	1.982458051863151	3.066048632910084	SLIT2;RPGRIP1L;GPRASP1
Phospholipid Dephosphorylation (GO:0046839)	3/29	0.212973	0.702299	0	0	1.982458051863151	3.066048632910084	INPP5B;MTMR11;PLPP2
Positive Regulation of Bone Mineralization (GO:0030501)	3/29	0.212973	0.702299	0	0	1.982458051863151	3.066048632910084	ADGRV1;ACVR2B;ACVR2A
Monoatomic Cation Homeostasis (GO:0055080)	5/58	0.214236	0.702299	0	0	1.6218642795883362	2.498771366298485	ASPH;ANK3;PSEN1;SLC12A7;SLC39A4
Phosphatidylinositol Metabolic Process (GO:0046488)	5/58	0.214236	0.702299	0	0	1.6218642795883362	2.498771366298485	INPP5B;PLCB4;MTMR11;PLCL2;INPPL1
Regulation of Translation (GO:0006417)	13/184	0.215351	0.702299	0	0	1.3091096995361968	2.010122525949261	TRIM71;EPHA4;DDX6;TIA1;EIF2AK3;MSI2;LARP1B;LRPPRC;RPS6KA3;IMPACT;IGF2BP3;IGF2BP2;OGT
B Cell Receptor Signaling Pathway (GO:0050853)	2/16	0.219461	0.702299	0	0	2.4534249343301675	3.7208123735134895	SYK;CLSTN1
COPII-coated Vesicle Cargo Loading (GO:0090110)	2/16	0.219461	0.702299	0	0	2.4534249343301675	3.7208123735134895	SEC23A;MIA3
Regulation of Keratinocyte Proliferation (GO:0010837)	2/16	0.219461	0.702299	0	0	2.4534249343301675	3.7208123735134895	MDK;FGFR2
Regulation of Lipid Storage (GO:0010883)	2/16	0.219461	0.702299	0	0	2.4534249343301675	3.7208123735134895	C3;SIRT1
Cardiac Epithelial to Mesenchymal Transition (GO:0060317)	2/16	0.219461	0.702299	0	0	2.4534249343301675	3.7208123735134895	TGFB2;TGFBR1
Cellular Response to Interleukin-6 (GO:0071354)	2/16	0.219461	0.702299	0	0	2.4534249343301675	3.7208123735134895	PTGIS;IL6ST
Response to Alcohol (GO:0097305)	2/16	0.219461	0.702299	0	0	2.4534249343301675	3.7208123735134895	SLIT2;TGFBR1
Cilium Movement (GO:0003341)	2/16	0.219461	0.702299	0	0	2.4534249343301675	3.7208123735134895	DNAH3;CCDC40
Diterpenoid Metabolic Process (GO:0016101)	2/16	0.219461	0.702299	0	0	2.4534249343301675	3.7208123735134895	CYP4V2;AKR1C3
Stress-Activated Protein Kinase Signaling Cascade (GO:0031098)	2/16	0.219461	0.702299	0	0	2.4534249343301675	3.7208123735134895	MAP3K20;MAP2K6
Transposable Element Silencing (GO:0010526)	2/16	0.219461	0.702299	0	0	2.4534249343301675	3.7208123735134895	MOV10;APOBEC3B
Glycoprotein Catabolic Process (GO:0006516)	2/16	0.219461	0.702299	0	0	2.4534249343301675	3.7208123735134895	FBXO2;OGA
Maintenance of Protein Location in Nucleus (GO:0051457)	2/16	0.219461	0.702299	0	0	2.4534249343301675	3.7208123735134895	BARD1;BBS4
Negative Regulation of Actin Filament Polymerization (GO:0030837)	2/16	0.219461	0.702299	0	0	2.4534249343301675	3.7208123735134895	SLIT2;PFN2
Negative Regulation of Lymphocyte Proliferation (GO:0050672)	2/16	0.219461	0.702299	0	0	2.4534249343301675	3.7208123735134895	SDC4;SOX11
Outflow Tract Septum Morphogenesis (GO:0003148)	2/16	0.219461	0.702299	0	0	2.4534249343301675	3.7208123735134895	TGFB2;FGFR2
Phosphatidylcholine Biosynthetic Process (GO:0006656)	2/16	0.219461	0.702299	0	0	2.4534249343301675	3.7208123735134895	SLC44A2;CEPT1
Positive Regulation of Glucose Metabolic Process (GO:0010907)	2/16	0.219461	0.702299	0	0	2.4534249343301675	3.7208123735134895	SLC45A3;SIRT1
Positive Regulation of Heart Contraction (GO:0045823)	2/16	0.219461	0.702299	0	0	2.4534249343301675	3.7208123735134895	TGFB2;APELA
Positive Regulation of Leukocyte Migration (GO:0002687)	2/16	0.219461	0.702299	0	0	2.4534249343301675	3.7208123735134895	MDK;MIA3
Protein Mannosylation (GO:0035268)	2/16	0.219461	0.702299	0	0	2.4534249343301675	3.7208123735134895	POMT1;TMTC1
Positive Regulation of Canonical Wnt Signaling Pathway (GO:0090263)	6/74	0.222486	0.702299	0	0	1.517195213789641	2.280179355809557	GPRC5B;TBL1XR1;PTK7;USP34;GPC3;FGFR2
Positive Regulation of Supramolecular Fiber Organization (GO:1902905)	6/74	0.222486	0.702299	0	0	1.517195213789641	2.280179355809557	FCHSD1;FCHSD2;NUMA1;EVL;PSEN1;PFN2
Cellular Response to Calcium Ion (GO:0071277)	4/44	0.222716	0.702299	0	0	1.718581560283688	2.581066700207918	NLGN1;ADGRV1;ASPH;AKR1C3
Mitotic G2/M Transition Checkpoint (GO:0044818)	4/44	0.222716	0.702299	0	0	1.718581560283688	2.581066700207918	BARD1;MRE11;TAOK1;CDK5RAP3
Negative Regulation of Phosphorylation (GO:0042326)	4/44	0.222716	0.702299	0	0	1.718581560283688	2.581066700207918	PAQR3;SLIT2;SIRT1;CDK5RAP3
Regulation of Plasma Membrane Bounded Cell Projection Assembly (GO:0120032)	5/59	0.224349	0.702299	0	0	1.5916982323232323	2.378875060776756	TBC1D19;RABGAP1;PODXL;TBC1D8;TBC1D2B
Positive Regulation of Intracellular Protein Transport (GO:0090316)	5/59	0.224349	0.702299	0	0	1.5916982323232323	2.378875060776756	GSK3B;ASPH;PSEN1;CEP290;SORL1
Positive Regulation of Angiogenesis (GO:0045766)	7/90	0.227044	0.702299	0	0	1.4504342154944565	2.150430604662693	APELA;PTGIS;MDK;CLSTN1;ITGB8;SIRT1;HIPK2
Regulation of Heart Rate by Cardiac Conduction (GO:0086091)	3/30	0.22769	0.702299	0	0	1.908876298394712	2.824695604213348	KCNE5;ANK2;DSC3
Regulation of Ossification (GO:0030278)	3/30	0.22769	0.702299	0	0	1.908876298394712	2.824695604213348	MDK;SOX11;ACVR2B
Regulation of Protein Polymerization (GO:0032271)	3/30	0.22769	0.702299	0	0	1.908876298394712	2.824695604213348	FCHSD1;FCHSD2;PFN2
Regulation of Synapse Organization (GO:0050807)	3/30	0.22769	0.702299	0	0	1.908876298394712	2.824695604213348	SETD5;EPHA4;CTNNA2
Negative Regulation of Cell-Substrate Adhesion (GO:0010812)	3/30	0.22769	0.702299	0	0	1.908876298394712	2.824695604213348	JAG1;FZD4;EFNA5
Positive Regulation of Biomineral Tissue Development (GO:0070169)	3/30	0.22769	0.702299	0	0	1.908876298394712	2.824695604213348	ADGRV1;ACVR2B;ACVR2A
Positive Regulation of Exocytosis (GO:0045921)	3/30	0.22769	0.702299	0	0	1.908876298394712	2.824695604213348	RAB2B;SDC4;RAB3D
Regulation of T Cell Differentiation (GO:0045580)	3/30	0.22769	0.702299	0	0	1.908876298394712	2.824695604213348	MDK;FANCA;ARID2
Golgi Organization (GO:0007030)	8/106	0.229363	0.702299	0	0	1.404174794026027	2.067579193048532	RAB2B;SPTBN5;HACE1;FBXW8;ATL3;GOLGB1;VTI1A;VPS13B
Axon Development (GO:0061564)	6/75	0.231532	0.702299	0	0	1.4950831838703693	2.1873651538534915	SHTN1;SLITRK5;ANK3;CNTN4;CTNNA2;FGFR2
Positive Regulation of Cellular Component Biogenesis (GO:0044089)	6/75	0.231532	0.702299	0	0	1.4950831838703693	2.1873651538534915	GSK3B;SYK;SDC4;SPIDR;TGFBR1;PFN2
Fat Cell Differentiation (GO:0045444)	4/45	0.234684	0.702299	0	0	1.6765265524995676	2.430150666407874	TCF7L2;ERAP1;SIRT1;BBS4
Negative Regulation of RNA Biosynthetic Process (GO:1902679)	23/354	0.234781	0.702299	0	0	1.1977795002334124	1.7357050549180084	ATF7IP;TCF7L2;PHC1;ZBTB14;CITED2;ARID4A;NR1D2;RSF1;ZNF12;SIRT1;STRN3;REST;BTAF1;SALL1;ZIC2;PSPC1;ID2;ID1;ZNF658;ZNF217;PATZ1;MTA3;APOBEC3B
Regulation of Neuron Apoptotic Process (GO:0043523)	7/91	0.23528	0.702299	0	0	1.433048433048433	2.0735930614341025	GSK3B;TGFB2;MDK;NTF3;TYRO3;IL6ST;HSPG2
Regulation of Synaptic Vesicle Exocytosis (GO:2000300)	2/17	0.240236	0.702299	0	0	2.2896746817538896	3.265381468861419	NLGN1;RIMS3
Response to Glucocorticoid (GO:0051384)	2/17	0.240236	0.702299	0	0	2.2896746817538896	3.265381468861419	REST;SLIT2
Embryonic Skeletal System Development (GO:0048706)	2/17	0.240236	0.702299	0	0	2.2896746817538896	3.265381468861419	KIAA1217;SOX11
Glutamate Metabolic Process (GO:0006536)	2/17	0.240236	0.702299	0	0	2.2896746817538896	3.265381468861419	DGLUCY;GLUL
Zinc Ion Transport (GO:0006829)	2/17	0.240236	0.702299	0	0	2.2896746817538896	3.265381468861419	SLC30A9;SLC39A4
Glycogen Metabolic Process (GO:0005977)	2/17	0.240236	0.702299	0	0	2.2896746817538896	3.265381468861419	GSK3B;PPP1R3C
Left/Right Pattern Formation (GO:0060972)	2/17	0.240236	0.702299	0	0	2.2896746817538896	3.265381468861419	CITED2;ZIC3
Membrane Protein Ectodomain Proteolysis (GO:0006509)	2/17	0.240236	0.702299	0	0	2.2896746817538896	3.265381468861419	ERAP1;PSEN1
Peripheral Nervous System Development (GO:0007422)	2/17	0.240236	0.702299	0	0	2.2896746817538896	3.265381468861419	UGT8;NFASC
Piecemeal Microautophagy of the Nucleus (GO:0034727)	2/17	0.240236	0.702299	0	0	2.2896746817538896	3.265381468861419	ATG4B;SNX30
Positive Regulation of Calcium Ion Transmembrane Transporter Activity (GO:1901021)	2/17	0.240236	0.702299	0	0	2.2896746817538896	3.265381468861419	ASPH;HAP1
Positive Regulation of Mononuclear Cell Migration (GO:0071677)	2/17	0.240236	0.702299	0	0	2.2896746817538896	3.265381468861419	CXCL12;PLA2G7
Positive Regulation of Neutrophil Migration (GO:1902624)	2/17	0.240236	0.702299	0	0	2.2896746817538896	3.265381468861419	MDK;THBS4
Positive Regulation of Receptor Internalization (GO:0002092)	2/17	0.240236	0.702299	0	0	2.2896746817538896	3.265381468861419	APELA;NTF3
Receptor Clustering (GO:0043113)	2/17	0.240236	0.702299	0	0	2.2896746817538896	3.265381468861419	NLGN1;DLG1
Regulation of Amyloid Precursor Protein Catabolic Process (GO:1902991)	2/17	0.240236	0.702299	0	0	2.2896746817538896	3.265381468861419	EPHA4;SORL1
Regulation of Mitotic Cell Cycle Phase Transition (GO:1901990)	6/76	0.240691	0.702299	0	0	1.4736029262345052	2.0987689377212475	ID2;MAP3K20;KNTC1;ARID2;CDC14A;APPL2
BMP Signaling Pathway (GO:0030509)	3/31	0.242591	0.702299	0	0	1.8405503844597328	2.606912596631472	HIVEP1;ACVR2B;ACVR2A
Actin Filament Bundle Organization (GO:0061572)	3/31	0.242591	0.702299	0	0	1.8405503844597328	2.606912596631472	MICAL1;DPYSL3;RFLNA
Regulation of Potassium Ion Transmembrane Transport (GO:1901379)	3/31	0.242591	0.702299	0	0	1.8405503844597328	2.606912596631472	DPP10;DLG1;KCNE5
Cellular Response to Fibroblast Growth Factor Stimulus (GO:0044344)	3/31	0.242591	0.702299	0	0	1.8405503844597328	2.606912596631472	TRIM71;FLRT3;FGFR2
Glycosphingolipid Metabolic Process (GO:0006687)	3/31	0.242591	0.702299	0	0	1.8405503844597328	2.606912596631472	UGT8;FUT9;ST6GALNAC5
Heart Morphogenesis (GO:0003007)	3/31	0.242591	0.702299	0	0	1.8405503844597328	2.606912596631472	TGFB2;CHD7;TGFBR1
Neuron Projection Extension (GO:1990138)	3/31	0.242591	0.702299	0	0	1.8405503844597328	2.606912596631472	NLGN3;IMPACT;FLRT3
Positive Regulation of B Cell Activation (GO:0050871)	3/31	0.242591	0.702299	0	0	1.8405503844597328	2.606912596631472	PGAP1;SYK;LRIF1
Positive Regulation of Leukocyte Chemotaxis (GO:0002690)	3/31	0.242591	0.702299	0	0	1.8405503844597328	2.606912596631472	CXCL12;MDK;PLA2G7
Regulation of Axonogenesis (GO:0050770)	3/31	0.242591	0.702299	0	0	1.8405503844597328	2.606912596631472	GSK3B;EPHA4;SLIT2
Positive Regulation of Inflammatory Response (GO:0050729)	5/61	0.244983	0.702299	0	0	1.5345982142857142	2.1585157069137146	GPRC5B;MDK;NAPEPLD;IL6ST;PLA2G7
Cellular Response to Ionizing Radiation (GO:0071479)	4/46	0.246802	0.702299	0	0	1.6364741641337386	2.28970385980961	BARD1;MAP3K20;SIRT1;SPIDR
mRNA Stabilization (GO:0048255)	4/46	0.246802	0.702299	0	0	1.6364741641337386	2.28970385980961	DAZL;CPAMD8;IGF2BP3;IGF2BP2
5S Class rRNA Transcription by RNA Polymerase III (GO:0042791)	1/5	0.246844	0.702299	0	0	4.290960451977401	6.00305185893298	GTF3C3
Regulation of Cortisol Biosynthetic Process (GO:2000064)	1/5	0.246844	0.702299	0	0	4.290960451977401	6.00305185893298	REST
B Cell Homeostasis (GO:0001782)	1/5	0.246844	0.702299	0	0	4.290960451977401	6.00305185893298	DOCK11
C21-steroid Hormone Metabolic Process (GO:0008207)	1/5	0.246844	0.702299	0	0	4.290960451977401	6.00305185893298	AKR1C3
DNA Cytosine Deamination (GO:0070383)	1/5	0.246844	0.702299	0	0	4.290960451977401	6.00305185893298	APOBEC3B
Regulation of Endodeoxyribonuclease Activity (GO:0032071)	1/5	0.246844	0.702299	0	0	4.290960451977401	6.00305185893298	SIRT1
Regulation of Endoplasmic Reticulum Tubular Network Organization (GO:1903371)	1/5	0.246844	0.702299	0	0	4.290960451977401	6.00305185893298	ATL3
Regulation of Epithelial Cell Apoptotic Process (GO:1904035)	1/5	0.246844	0.702299	0	0	4.290960451977401	6.00305185893298	MDK
Regulation of Extracellular Exosome Assembly (GO:1903551)	1/5	0.246844	0.702299	0	0	4.290960451977401	6.00305185893298	SDC4
Regulation of Feeding Behavior (GO:0060259)	1/5	0.246844	0.702299	0	0	4.290960451977401	6.00305185893298	LEPROT
L-fucose Catabolic Process (GO:0042355)	1/5	0.246844	0.702299	0	0	4.290960451977401	6.00305185893298	FUT9
L-fucose Metabolic Process (GO:0042354)	1/5	0.246844	0.702299	0	0	4.290960451977401	6.00305185893298	FUT9
Regulation of Hematopoietic Stem Cell Proliferation (GO:1902033)	1/5	0.246844	0.702299	0	0	4.290960451977401	6.00305185893298	N4BP2L2
Regulation of Lens Fiber Cell Differentiation (GO:1902746)	1/5	0.246844	0.702299	0	0	4.290960451977401	6.00305185893298	SPRED1
Regulation of Leukocyte Degranulation (GO:0043300)	1/5	0.246844	0.702299	0	0	4.290960451977401	6.00305185893298	SYK
Regulation of Lymphocyte Proliferation (GO:0050670)	1/5	0.246844	0.702299	0	0	4.290960451977401	6.00305185893298	SOX11
Regulation of Metaphase Plate Congression (GO:0090235)	1/5	0.246844	0.702299	0	0	4.290960451977401	6.00305185893298	NUMA1
Regulation of miRNA Catabolic Process (GO:2000625)	1/5	0.246844	0.702299	0	0	4.290960451977401	6.00305185893298	TENT2
Regulation of Microvillus Organization (GO:0032530)	1/5	0.246844	0.702299	0	0	4.290960451977401	6.00305185893298	PODXL
Adiponectin-Activated Signaling Pathway (GO:0033211)	1/5	0.246844	0.702299	0	0	4.290960451977401	6.00305185893298	APPL2
Regulation of Nuclear Receptor-Mediated Glucocorticoid Signaling Pathway (GO:2000322)	1/5	0.246844	0.702299	0	0	4.290960451977401	6.00305185893298	LMO3
Regulation of Peptidyl-Lysine Acetylation (GO:2000756)	1/5	0.246844	0.702299	0	0	4.290960451977401	6.00305185893298	SIRT1
Astrocyte Activation (GO:0048143)	1/5	0.246844	0.702299	0	0	4.290960451977401	6.00305185893298	PSEN1
Atrial Cardiac Muscle Cell to AV Node Cell Signaling (GO:0086026)	1/5	0.246844	0.702299	0	0	4.290960451977401	6.00305185893298	KCNE5
Regulation of Phospholipase Activity (GO:0010517)	1/5	0.246844	0.702299	0	0	4.290960451977401	6.00305185893298	FGFR2
Attachment of GPI Anchor to Protein (GO:0016255)	1/5	0.246844	0.702299	0	0	4.290960451977401	6.00305185893298	PGAP1
Auditory Receptor Cell Stereocilium Organization (GO:0060088)	1/5	0.246844	0.702299	0	0	4.290960451977401	6.00305185893298	REST
Axon Extension Involved in Axon Guidance (GO:0048846)	1/5	0.246844	0.702299	0	0	4.290960451977401	6.00305185893298	SLIT2
Regulation of Protein Lipidation (GO:1903059)	1/5	0.246844	0.702299	0	0	4.290960451977401	6.00305185893298	RABL3
Bone Resorption (GO:0045453)	1/5	0.246844	0.702299	0	0	4.290960451977401	6.00305185893298	RAB3D
Bundle of His Cell to Purkinje Myocyte Communication (GO:0086069)	1/5	0.246844	0.702299	0	0	4.290960451977401	6.00305185893298	DSC3
Regulation of Respiratory Gaseous Exchange (GO:0043576)	1/5	0.246844	0.702299	0	0	4.290960451977401	6.00305185893298	GRPR
Regulation of Respiratory System Process (GO:0044065)	1/5	0.246844	0.702299	0	0	4.290960451977401	6.00305185893298	NLGN3
Regulation of Stem Cell Division (GO:2000035)	1/5	0.246844	0.702299	0	0	4.290960451977401	6.00305185893298	NCOA3
Regulation of Triglyceride Catabolic Process (GO:0010896)	1/5	0.246844	0.702299	0	0	4.290960451977401	6.00305185893298	SORL1
Cellular Response to Oxidised Low-Density Lipoprotein Particle Stimulus (GO:0140052)	1/5	0.246844	0.702299	0	0	4.290960451977401	6.00305185893298	MIA3
Response to Corticosteroid (GO:0031960)	1/5	0.246844	0.702299	0	0	4.290960451977401	6.00305185893298	AKR1C3
Cerebellar Granule Cell Differentiation (GO:0021707)	1/5	0.246844	0.702299	0	0	4.290960451977401	6.00305185893298	OPHN1
Chondrocyte Development (GO:0002063)	1/5	0.246844	0.702299	0	0	4.290960451977401	6.00305185893298	EIF2AK3
Response to Yeast (GO:0001878)	1/5	0.246844	0.702299	0	0	4.290960451977401	6.00305185893298	CPAMD8
Columnar/Cuboidal Epithelial Cell Differentiation (GO:0002065)	1/5	0.246844	0.702299	0	0	4.290960451977401	6.00305185893298	SOX11
Retinoic Acid Metabolic Process (GO:0042573)	1/5	0.246844	0.702299	0	0	4.290960451977401	6.00305185893298	CYP26A1
Coronary Vasculature Development (GO:0060976)	1/5	0.246844	0.702299	0	0	4.290960451977401	6.00305185893298	GPC3
Cytidine to Uridine Editing (GO:0016554)	1/5	0.246844	0.702299	0	0	4.290960451977401	6.00305185893298	APOBEC3B
Sequestering of Extracellular Ligand From Receptor (GO:0035581)	1/5	0.246844	0.702299	0	0	4.290960451977401	6.00305185893298	LTBP1
Serotonin Transport (GO:0006837)	1/5	0.246844	0.702299	0	0	4.290960451977401	6.00305185893298	SLC18A2
Short-Chain Fatty Acid Metabolic Process (GO:0046459)	1/5	0.246844	0.702299	0	0	4.290960451977401	6.00305185893298	PCCA
Dorsal/Ventral Axis Specification (GO:0009950)	1/5	0.246844	0.702299	0	0	4.290960451977401	6.00305185893298	CXXC4
Spermidine Metabolic Process (GO:0008216)	1/5	0.246844	0.702299	0	0	4.290960451977401	6.00305185893298	NPR2
succinyl-CoA Catabolic Process (GO:1901289)	1/5	0.246844	0.702299	0	0	4.290960451977401	6.00305185893298	SUCLG2
Sulfation (GO:0051923)	1/5	0.246844	0.702299	0	0	4.290960451977401	6.00305185893298	SULT4A1
Thymus Development (GO:0048538)	1/5	0.246844	0.702299	0	0	4.290960451977401	6.00305185893298	TGFBR1
Transepithelial Chloride Transport (GO:0030321)	1/5	0.246844	0.702299	0	0	4.290960451977401	6.00305185893298	CLCNKB
Fatty Acid Alpha-Oxidation (GO:0001561)	1/5	0.246844	0.702299	0	0	4.290960451977401	6.00305185893298	PHYH
Fucose Catabolic Process (GO:0019317)	1/5	0.246844	0.702299	0	0	4.290960451977401	6.00305185893298	FUT9
Galactosylceramide Metabolic Process (GO:0006681)	1/5	0.246844	0.702299	0	0	4.290960451977401	6.00305185893298	UGT8
Vasoconstriction (GO:0042310)	1/5	0.246844	0.702299	0	0	4.290960451977401	6.00305185893298	KEL
Glutamatergic Neuron Differentiation (GO:1905962)	1/5	0.246844	0.702299	0	0	4.290960451977401	6.00305185893298	OPHN1
Glycosylceramide Biosynthetic Process (GO:0046476)	1/5	0.246844	0.702299	0	0	4.290960451977401	6.00305185893298	UGT8
Ketone Body Metabolic Process (GO:1902224)	1/5	0.246844	0.702299	0	0	4.290960451977401	6.00305185893298	ACSS3
Lens Fiber Cell Development (GO:0070307)	1/5	0.246844	0.702299	0	0	4.290960451977401	6.00305185893298	BFSP1
Lymphocyte Activation Involved in Immune Response (GO:0002285)	1/5	0.246844	0.702299	0	0	4.290960451977401	6.00305185893298	MDK
Lymphocyte Migration (GO:0072676)	1/5	0.246844	0.702299	0	0	4.290960451977401	6.00305185893298	RET
Maintenance of DNA Repeat Elements (GO:0043570)	1/5	0.246844	0.702299	0	0	4.290960451977401	6.00305185893298	TCF7L2
Marginal Zone B Cell Differentiation (GO:0002315)	1/5	0.246844	0.702299	0	0	4.290960451977401	6.00305185893298	DOCK11
Monoamine Transport (GO:0015844)	1/5	0.246844	0.702299	0	0	4.290960451977401	6.00305185893298	SLC18A2
Morphogenesis of an Epithelial Sheet (GO:0002011)	1/5	0.246844	0.702299	0	0	4.290960451977401	6.00305185893298	SOX11
Myeloid Leukocyte Mediated Immunity (GO:0002444)	1/5	0.246844	0.702299	0	0	4.290960451977401	6.00305185893298	SERPINB9
Negative Regulation of T Cell Apoptotic Process (GO:0070233)	1/5	0.246844	0.702299	0	0	4.290960451977401	6.00305185893298	TSC22D3
Negative Regulation of Actin Nucleation (GO:0051126)	1/5	0.246844	0.702299	0	0	4.290960451977401	6.00305185893298	CTNNA2
Negative Regulation of Appetite (GO:0032099)	1/5	0.246844	0.702299	0	0	4.290960451977401	6.00305185893298	BBS4
Negative Regulation of Bone Mineralization (GO:0030502)	1/5	0.246844	0.702299	0	0	4.290960451977401	6.00305185893298	RFLNA
Negative Regulation of Cellular Response to Hypoxia (GO:1900038)	1/5	0.246844	0.702299	0	0	4.290960451977401	6.00305185893298	EPHA4
Negative Regulation of Collateral Sprouting (GO:0048671)	1/5	0.246844	0.702299	0	0	4.290960451977401	6.00305185893298	PTPRS
Negative Regulation of Hydrogen Peroxide-Mediated Programmed Cell Death (GO:1901299)	1/5	0.246844	0.702299	0	0	4.290960451977401	6.00305185893298	SOS1
Negative Regulation of Inflammatory Response to Wounding (GO:0106015)	1/5	0.246844	0.702299	0	0	4.290960451977401	6.00305185893298	MDK
Negative Regulation of Keratinocyte Proliferation (GO:0010839)	1/5	0.246844	0.702299	0	0	4.290960451977401	6.00305185893298	FGFR2
Negative Regulation of Lens Fiber Cell Differentiation (GO:1902747)	1/5	0.246844	0.702299	0	0	4.290960451977401	6.00305185893298	SPRED1
Negative Regulation of Leukocyte Chemotaxis (GO:0002689)	1/5	0.246844	0.702299	0	0	4.290960451977401	6.00305185893298	SLIT2
Negative Regulation of Response to Type II Interferon (GO:0060331)	1/5	0.246844	0.702299	0	0	4.290960451977401	6.00305185893298	PARP14
Negative Regulation of Type II Interferon-Mediated Signaling Pathway (GO:0060336)	1/5	0.246844	0.702299	0	0	4.290960451977401	6.00305185893298	PARP14
Negative Regulation of Voltage-Gated Calcium Channel Activity (GO:1901386)	1/5	0.246844	0.702299	0	0	4.290960451977401	6.00305185893298	CBARP
Neuron Projection Extension Involved in Neuron Projection Guidance (GO:1902284)	1/5	0.246844	0.702299	0	0	4.290960451977401	6.00305185893298	SLIT2
Neurotransmitter-Gated Ion Channel Clustering (GO:0072578)	1/5	0.246844	0.702299	0	0	4.290960451977401	6.00305185893298	NLGN1
Phosphatidylcholine Catabolic Process (GO:0034638)	1/5	0.246844	0.702299	0	0	4.290960451977401	6.00305185893298	PLA2G7
Phosphatidylglycerol Biosynthetic Process (GO:0006655)	1/5	0.246844	0.702299	0	0	4.290960451977401	6.00305185893298	TAMM41
Positive Regulation of Acute Inflammatory Response (GO:0002675)	1/5	0.246844	0.702299	0	0	4.290960451977401	6.00305185893298	IL6ST
Positive Regulation of Astrocyte Differentiation (GO:0048711)	1/5	0.246844	0.702299	0	0	4.290960451977401	6.00305185893298	ID2
Positive Regulation of Blood Circulation (GO:1903524)	1/5	0.246844	0.702299	0	0	4.290960451977401	6.00305185893298	TGFB2
Positive Regulation of Centriole Elongation (GO:1903724)	1/5	0.246844	0.702299	0	0	4.290960451977401	6.00305185893298	POC1B
Positive Regulation of Endocytic Recycling (GO:2001137)	1/5	0.246844	0.702299	0	0	4.290960451977401	6.00305185893298	SORL1
Positive Regulation of Lipase Activity (GO:0060193)	1/5	0.246844	0.702299	0	0	4.290960451977401	6.00305185893298	FGFR2
Positive Regulation of Mitotic Sister Chromatid Segregation (GO:0062033)	1/5	0.246844	0.702299	0	0	4.290960451977401	6.00305185893298	NUMA1
Positive Regulation of Protein Localization to Centrosome (GO:1904781)	1/5	0.246844	0.702299	0	0	4.290960451977401	6.00305185893298	GSK3B
Positive Regulation of Protein Localization to Cilium (GO:1903566)	1/5	0.246844	0.702299	0	0	4.290960451977401	6.00305185893298	GSK3B
Positive Regulation of Transforming Growth Factor Beta Production (GO:0071636)	1/5	0.246844	0.702299	0	0	4.290960451977401	6.00305185893298	CD46
Pyrimidine Nucleobase Catabolic Process (GO:0006208)	1/5	0.246844	0.702299	0	0	4.290960451977401	6.00305185893298	DPYSL3
Regulation of Rab Protein Signal Transduction (GO:0032483)	1/5	0.246844	0.702299	0	0	4.290960451977401	6.00305185893298	DENND4C
Regulation of Aldosterone Biosynthetic Process (GO:0032347)	1/5	0.246844	0.702299	0	0	4.290960451977401	6.00305185893298	REST
Regulation of Blood Vessel Branching (GO:1905553)	1/5	0.246844	0.702299	0	0	4.290960451977401	6.00305185893298	MDK
Regulation of Calcium Import Into the Mitochondrion (GO:0110097)	1/5	0.246844	0.702299	0	0	4.290960451977401	6.00305185893298	SPG7
Regulation of Cardiac Epithelial to Mesenchymal Transition (GO:0062042)	1/5	0.246844	0.702299	0	0	4.290960451977401	6.00305185893298	JAG1
Regulation of Cell Killing (GO:0031341)	1/5	0.246844	0.702299	0	0	4.290960451977401	6.00305185893298	TGFB2
Regulation of Cellular Response to Hypoxia (GO:1900037)	1/5	0.246844	0.702299	0	0	4.290960451977401	6.00305185893298	EPHA4
Regulation of Primary Metabolic Process (GO:0080090)	7/93	0.252036	0.711628	0	0	1.399489829722388	1.9287531502463162	ID2;RBM12B;NR1D2;HNRNPH3;RBM12;MBNL3;BBS4
Calcium Ion Homeostasis (GO:0055074)	5/62	0.255481	0.711628	0	0	1.5075508373205742	2.0572121688748664	CXCL12;ASPH;ANK2;PSEN1;SLC8B1
Regulation of Intracellular Signal Transduction (GO:1902531)	17/258	0.257009	0.711628	0	0	1.2145623965653707	1.6501596036610255	EPHA4;NLGN1;PGAP1;AKR1C3;TRAF1;ARHGAP5;SIRT1;HIPK2;PREX2;PREX1;ARHGEF9;DLG1;SPRED1;OBSCN;RRAGB;TRAF5;MAP2K6
Regulation of Erythrocyte Differentiation (GO:0045646)	3/32	0.257644	0.711628	0	0	1.7769366025202695	2.40984010048327	MIA3;GLUL;ACVR2A
Regulation of Glycolytic Process (GO:0006110)	3/32	0.257644	0.711628	0	0	1.7769366025202695	2.40984010048327	MIA3;PSEN1;OGT
Regulation of Intracellular Protein Transport (GO:0033157)	3/32	0.257644	0.711628	0	0	1.7769366025202695	2.40984010048327	GSK3B;ASPH;CEP290
Activation of Protein Kinase Activity (GO:0032147)	3/32	0.257644	0.711628	0	0	1.7769366025202695	2.40984010048327	TOM1L1;CCDC88A;TGFB2
Cartilage Development (GO:0051216)	3/32	0.257644	0.711628	0	0	1.7769366025202695	2.40984010048327	CREB3L2;COL11A2;ITGB8
Water-Soluble Vitamin Metabolic Process (GO:0006767)	3/32	0.257644	0.711628	0	0	1.7769366025202695	2.40984010048327	DHFR2;GSTO2;SP8
miRNA Processing (GO:0035196)	3/32	0.257644	0.711628	0	0	1.7769366025202695	2.40984010048327	TRIM71;LIN28B;AGO4
Positive Regulation of Lymphocyte Proliferation (GO:0050671)	3/32	0.257644	0.711628	0	0	1.7769366025202695	2.40984010048327	PGAP1;CD46;IL6ST
Positive Regulation of Protein Binding (GO:0032092)	3/32	0.257644	0.711628	0	0	1.7769366025202695	2.40984010048327	GSK3B;TCF7L2;HIPK2
Regulation of DNA-templated Transcription Elongation (GO:0032784)	3/32	0.257644	0.711628	0	0	1.7769366025202695	2.40984010048327	SETD5;CCNT2;INTS6
Regulation of Smoothened Signaling Pathway (GO:0008589)	4/47	0.259052	0.711628	0	0	1.598284677552367	2.1588428509741022	TEDC1;ARMC9;GPC3;FGFR2
Negative Regulation of Response to Stimulus (GO:0048585)	4/47	0.259052	0.711628	0	0	1.598284677552367	2.1588428509741022	EPHA4;SLIT2;SIRT1;APPL2
Neuron Migration (GO:0001764)	4/47	0.259052	0.711628	0	0	1.598284677552367	2.1588428509741022	ABI2;CELSR1;ASTN2;ADGRL3
Regulation of G Protein-Coupled Receptor Signaling Pathway (GO:0008277)	4/47	0.259052	0.711628	0	0	1.598284677552367	2.1588428509741022	C3;GNG7;RGS12;RPGRIP1L
Positive Regulation of Neuron Projection Development (GO:0010976)	6/78	0.259319	0.711628	0	0	1.4324324324324325	1.9333465203252846	RET;FUT9;PTK7;MDK;DPYSL3;ZDHHC15
Regulation of Keratinocyte Differentiation (GO:0045616)	2/18	0.261094	0.711628	0	0	2.1463932107496464	2.8823337760797942	NUMA1;NCOA3
Regulation of Lysosomal Lumen pH (GO:0035751)	2/18	0.261094	0.711628	0	0	2.1463932107496464	2.8823337760797942	LAMP2;TCIRG1
Regulation of Postsynaptic Membrane Potential (GO:0060078)	2/18	0.261094	0.711628	0	0	2.1463932107496464	2.8823337760797942	NLGN3;GSK3B
Axoneme Assembly (GO:0035082)	2/18	0.261094	0.711628	0	0	2.1463932107496464	2.8823337760797942	SPAG16;CCDC40
Carbohydrate Biosynthetic Process (GO:0016051)	2/18	0.261094	0.711628	0	0	2.1463932107496464	2.8823337760797942	FUT9;ST6GALNAC5
Cell Migration Involved in Sprouting Angiogenesis (GO:0002042)	2/18	0.261094	0.711628	0	0	2.1463932107496464	2.8823337760797942	MIA3;SLIT2
Chemical Synaptic Transmission, Postsynaptic (GO:0099565)	2/18	0.261094	0.711628	0	0	2.1463932107496464	2.8823337760797942	NLGN3;GSK3B
Glial Cell Development (GO:0021782)	2/18	0.261094	0.711628	0	0	2.1463932107496464	2.8823337760797942	MYRF;MDK
Hepaticobiliary System Development (GO:0061008)	2/18	0.261094	0.711628	0	0	2.1463932107496464	2.8823337760797942	CITED2;CDK5RAP3
Negative Regulation of DNA Binding (GO:0043392)	2/18	0.261094	0.711628	0	0	2.1463932107496464	2.8823337760797942	RSF1;SOX11
Negative Regulation of Amide Metabolic Process (GO:0034249)	2/18	0.261094	0.711628	0	0	2.1463932107496464	2.8823337760797942	HAP1;SORL1
Negative Regulation of Lipid Biosynthetic Process (GO:0051055)	2/18	0.261094	0.711628	0	0	2.1463932107496464	2.8823337760797942	AKR1C3;SIRT1
Negative Regulation of Neurogenesis (GO:0050768)	2/18	0.261094	0.711628	0	0	2.1463932107496464	2.8823337760797942	REST;SORL1
Phosphatidylinositol Dephosphorylation (GO:0046856)	2/18	0.261094	0.711628	0	0	2.1463932107496464	2.8823337760797942	INPP5B;MTMR11
Phosphatidylinositol-Mediated Signaling (GO:0048015)	2/18	0.261094	0.711628	0	0	2.1463932107496464	2.8823337760797942	PLCB4;PLCL2
Positive Regulation of Dendritic Spine Development (GO:0060999)	2/18	0.261094	0.711628	0	0	2.1463932107496464	2.8823337760797942	NLGN1;PSEN1
Positive Regulation of Morphogenesis of an Epithelium (GO:1905332)	2/18	0.261094	0.711628	0	0	2.1463932107496464	2.8823337760797942	MDK;CLSTN1
Presynaptic Endocytosis (GO:0140238)	2/18	0.261094	0.711628	0	0	2.1463932107496464	2.8823337760797942	NLGN3;OPHN1
Prostaglandin Metabolic Process (GO:0006693)	2/18	0.261094	0.711628	0	0	2.1463932107496464	2.8823337760797942	PTGIS;AKR1C3
Protein K48-linked Deubiquitination (GO:0071108)	2/18	0.261094	0.711628	0	0	2.1463932107496464	2.8823337760797942	USP34;OTUD3
Transforming Growth Factor Beta Receptor Signaling Pathway (GO:0007179)	5/63	0.266087	0.711628	0	0	1.4814361285266457	1.9613204108642954	TGFB2;ID1;SIRT1;APPL2;TGFBR1
Regulation of Cytokine Production (GO:0001817)	7/95	0.269137	0.711628	0	0	1.3674566174566174	1.794836760812311	ZBTB39;ZBTB14;CLSTN1;IGF2BP3;IGF2BP2;PATZ1;ERMAP
Glycerophospholipid Biosynthetic Process (GO:0046474)	7/95	0.269137	0.711628	0	0	1.3674566174566174	1.794836760812311	DGKE;TAMM41;SLC44A2;ETNK1;INPPL1;CEPT1;AGPAT4
Positive Regulation of TORC1 Signaling (GO:1904263)	4/48	0.271418	0.711628	0	0	1.5618310767246937	2.0367742160665103	SYK;RRAGB;OGT;GPR137C
Regulation of Filopodium Assembly (GO:0051489)	3/33	0.272817	0.711628	0	0	1.7175637393767706	2.2310386271601343	DOCK11;NLGN1;DPYSL3
Cognition (GO:0050890)	3/33	0.272817	0.711628	0	0	1.7175637393767706	2.2310386271601343	SETD5;CHD7;BBS4
Stem Cell Differentiation (GO:0048863)	3/33	0.272817	0.711628	0	0	1.7175637393767706	2.2310386271601343	TGFB2;MTF2;FGFR2
Lipid Modification (GO:0030258)	3/33	0.272817	0.711628	0	0	1.7175637393767706	2.2310386271601343	DGKE;PLPP2;PLA2G7
Microtubule Bundle Formation (GO:0001578)	3/33	0.272817	0.711628	0	0	1.7175637393767706	2.2310386271601343	SPAG16;NUMA1;CCDC40
Regulation of T Cell Proliferation (GO:0042129)	3/33	0.272817	0.711628	0	0	1.7175637393767706	2.2310386271601343	SDC4;CD46;IL6ST
Synapse Assembly (GO:0007416)	5/64	0.276789	0.711628	0	0	1.4562066640986133	1.8704976708136198	NLGN3;FARP1;NLGN1;FLRT3;ADGRL3
Positive Regulation of Cellular Component Organization (GO:0051130)	6/80	0.278313	0.711628	0	0	1.393487370727769	1.7822805726540394	GSK3B;TGFB2;SYK;GPC3;SPIDR;TGFBR1
Cellular Response to Lipid (GO:0071396)	9/129	0.281192	0.711628	0	0	1.2895714285714286	1.63610015099408	RET;GSK3B;SYK;FZD4;PTK7;AXL;NCOA3;AKR1C3;LCOR
Fc-epsilon Receptor Signaling Pathway (GO:0038095)	2/19	0.281964	0.711628	0	0	2.0199683833929614	2.5572284797491096	SYK;SOS1
Endoplasmic Reticulum Calcium Ion Homeostasis (GO:0032469)	2/19	0.281964	0.711628	0	0	2.0199683833929614	2.5572284797491096	PACS2;PSEN1
Entrainment of Circadian Clock by Photoperiod (GO:0043153)	2/19	0.281964	0.711628	0	0	2.0199683833929614	2.5572284797491096	PER3;ID2
Intracellular Zinc Ion Homeostasis (GO:0006882)	2/19	0.281964	0.711628	0	0	2.0199683833929614	2.5572284797491096	SLC30A9;SLC39A4
Positive Regulation of Epidermal Growth Factor Receptor Signaling Pathway (GO:0045742)	2/19	0.281964	0.711628	0	0	2.0199683833929614	2.5572284797491096	CCDC88A;HAP1
Positive Regulation of Excitatory Postsynaptic Potential (GO:2000463)	2/19	0.281964	0.711628	0	0	2.0199683833929614	2.5572284797491096	NLGN3;NLGN1
Regulation of Blood Circulation (GO:1903522)	2/19	0.281964	0.711628	0	0	2.0199683833929614	2.5572284797491096	KCNE5;CACNA1H
Positive Regulation of Secretion by Cell (GO:1903532)	4/49	0.283883	0.711628	0	0	1.5269976359338062	1.9227837290891527	RAB2B;TGFB2;SOX11;APBB3
Cellular Response to Hypoxia (GO:0071456)	5/65	0.287576	0.711628	0	0	1.4318181818181819	1.7844271849451943	PTGIS;TBL2;CITED2;SIRT1;HIPK2
Negative Regulation of Angiogenesis (GO:0016525)	5/65	0.287576	0.711628	0	0	1.4318181818181819	1.7844271849451943	SPRED1;TGFB2;HSPG2;THBS4;ZNF354C
Regulation of Protein Localization (GO:0032880)	6/81	0.287929	0.711628	0	0	1.3747937411095306	1.7116758540624204	DLG1;CPAMD8;INPPL1;GPC3;CEP72;CEP290
Notch Signaling Pathway (GO:0007219)	3/34	0.28808	0.711628	0	0	1.6620213835328521	2.068416336911644	APH1B;JAG1;PSEN1
Regulation of Lipid Metabolic Process (GO:0019216)	3/34	0.28808	0.711628	0	0	1.6620213835328521	2.068416336911644	ID2;NR1D2;BBS4
Regulation of Monoatomic Cation Transmembrane Transport (GO:1904062)	3/34	0.28808	0.711628	0	0	1.6620213835328521	2.068416336911644	DPP10;DLG1;KCNE5
Regulation of Synaptic Transmission, Glutamatergic (GO:0051966)	3/34	0.28808	0.711628	0	0	1.6620213835328521	2.068416336911644	NLGN3;NLGN1;OPHN1
Cellular Response to Radiation (GO:0071478)	3/34	0.28808	0.711628	0	0	1.6620213835328521	2.068416336911644	BARD1;SIRT1;SPIDR
Vacuolar Transport (GO:0007034)	3/34	0.28808	0.711628	0	0	1.6620213835328521	2.068416336911644	SPTBN5;AP1G2;VTI1A
Negative Regulation of Double-Strand Break Repair (GO:2000780)	3/34	0.28808	0.711628	0	0	1.6620213835328521	2.068416336911644	MRE11;KLHL15;LRIF1
L-arginine Transmembrane Transport (GO:1903826)	1/6	0.288367	0.711628	0	0	3.432485875706215	4.2683706976058575	SLC25A29
Regulation of Hepatocyte Proliferation (GO:2000345)	1/6	0.288367	0.711628	0	0	3.432485875706215	4.2683706976058575	MDK
NAD Biosynthesis via Nicotinamide Riboside Salvage Pathway (GO:0034356)	1/6	0.288367	0.711628	0	0	3.432485875706215	4.2683706976058575	PTGIS
Regulation of Inflammatory Response to Wounding (GO:0106014)	1/6	0.288367	0.711628	0	0	3.432485875706215	4.2683706976058575	MDK
PERK-mediated Unfolded Protein Response (GO:0036499)	1/6	0.288367	0.711628	0	0	3.432485875706215	4.2683706976058575	EIF2AK3
T-helper 17 Cell Differentiation (GO:0072539)	1/6	0.288367	0.711628	0	0	3.432485875706215	4.2683706976058575	IL6ST
T-helper 17 Cell Lineage Commitment (GO:0072540)	1/6	0.288367	0.711628	0	0	3.432485875706215	4.2683706976058575	IL6ST
Regulation of Myeloid Leukocyte Mediated Immunity (GO:0002886)	1/6	0.288367	0.711628	0	0	3.432485875706215	4.2683706976058575	SYK
Astrocyte Development (GO:0014002)	1/6	0.288367	0.711628	0	0	3.432485875706215	4.2683706976058575	PSEN1
Atrial Septum Morphogenesis (GO:0060413)	1/6	0.288367	0.711628	0	0	3.432485875706215	4.2683706976058575	TGFB2
Regulation of Pinocytosis (GO:0048548)	1/6	0.288367	0.711628	0	0	3.432485875706215	4.2683706976058575	AXL
Auditory Receptor Cell Morphogenesis (GO:0002093)	1/6	0.288367	0.711628	0	0	3.432485875706215	4.2683706976058575	REST
Axon Ensheathment in Central Nervous System (GO:0032291)	1/6	0.288367	0.711628	0	0	3.432485875706215	4.2683706976058575	MYRF
Basic Amino Acid Transmembrane Transport (GO:1990822)	1/6	0.288367	0.711628	0	0	3.432485875706215	4.2683706976058575	SLC25A29
Branching Involved in Ureteric Bud Morphogenesis (GO:0001658)	1/6	0.288367	0.711628	0	0	3.432485875706215	4.2683706976058575	SALL1
Cardiac Cell Development (GO:0055006)	1/6	0.288367	0.711628	0	0	3.432485875706215	4.2683706976058575	JAG1
Regulation of Store-Operated Calcium Entry (GO:2001256)	1/6	0.288367	0.711628	0	0	3.432485875706215	4.2683706976058575	SLC8B1
Regulation of Translational Initiation in Response to Stress (GO:0043558)	1/6	0.288367	0.711628	0	0	3.432485875706215	4.2683706976058575	IMPACT
Cellular Response to Dopamine (GO:1903351)	1/6	0.288367	0.711628	0	0	3.432485875706215	4.2683706976058575	GSK3B
Regulation of Type B Pancreatic Cell Development (GO:2000074)	1/6	0.288367	0.711628	0	0	3.432485875706215	4.2683706976058575	GSK3B
Renal Sodium Ion Absorption (GO:0070294)	1/6	0.288367	0.711628	0	0	3.432485875706215	4.2683706976058575	KLHL3
Renal Sodium Ion Transport (GO:0003096)	1/6	0.288367	0.711628	0	0	3.432485875706215	4.2683706976058575	KLHL3
Cellular Response to Prostaglandin Stimulus (GO:0071379)	1/6	0.288367	0.711628	0	0	3.432485875706215	4.2683706976058575	AKR1C3
Choline Transport (GO:0015871)	1/6	0.288367	0.711628	0	0	3.432485875706215	4.2683706976058575	SLC44A2
Cochlea Morphogenesis (GO:0090103)	1/6	0.288367	0.711628	0	0	3.432485875706215	4.2683706976058575	POU3F4
Collagen-Activated Signaling Pathway (GO:0038065)	1/6	0.288367	0.711628	0	0	3.432485875706215	4.2683706976058575	COL4A6
Retinal Ganglion Cell Axon Guidance (GO:0031290)	1/6	0.288367	0.711628	0	0	3.432485875706215	4.2683706976058575	SLIT2
Retinal Rod Cell Differentiation (GO:0060221)	1/6	0.288367	0.711628	0	0	3.432485875706215	4.2683706976058575	RPGRIP1L
Sperm DNA Condensation (GO:0035092)	1/6	0.288367	0.711628	0	0	3.432485875706215	4.2683706976058575	CHD6
Embryonic Axis Specification (GO:0000578)	1/6	0.288367	0.711628	0	0	3.432485875706215	4.2683706976058575	CXXC4
Subtelomeric Heterochromatin Formation (GO:0031509)	1/6	0.288367	0.711628	0	0	3.432485875706215	4.2683706976058575	LRIF1
Establishment of Centrosome Localization (GO:0051660)	1/6	0.288367	0.711628	0	0	3.432485875706215	4.2683706976058575	DLG1
Establishment of Mitochondrion Localization, Microtubule-Mediated (GO:0034643)	1/6	0.288367	0.711628	0	0	3.432485875706215	4.2683706976058575	LRPPRC
Facultative Heterochromatin Formation (GO:0140718)	1/6	0.288367	0.711628	0	0	3.432485875706215	4.2683706976058575	SIRT1
Ureteric Bud Morphogenesis (GO:0060675)	1/6	0.288367	0.711628	0	0	3.432485875706215	4.2683706976058575	SALL1
Heparan Sulfate Proteoglycan Catabolic Process (GO:0030200)	1/6	0.288367	0.711628	0	0	3.432485875706215	4.2683706976058575	GNS
Icosanoid Transport (GO:0071715)	1/6	0.288367	0.711628	0	0	3.432485875706215	4.2683706976058575	ABCC6
Insulin Secretion Involved in Cellular Response to Glucose Stimulus (GO:0035773)	1/6	0.288367	0.711628	0	0	3.432485875706215	4.2683706976058575	PTPRN2
Integrin Activation (GO:0033622)	1/6	0.288367	0.711628	0	0	3.432485875706215	4.2683706976058575	CXCL12
Locomotor Rhythm (GO:0045475)	1/6	0.288367	0.711628	0	0	3.432485875706215	4.2683706976058575	ID2
Mammary Gland Epithelial Cell Differentiation (GO:0060644)	1/6	0.288367	0.711628	0	0	3.432485875706215	4.2683706976058575	ID2
Mature B Cell Differentiation Involved in Immune Response (GO:0002313)	1/6	0.288367	0.711628	0	0	3.432485875706215	4.2683706976058575	DOCK11
Mitochondrion-Endoplasmic Reticulum Membrane Tethering (GO:1990456)	1/6	0.288367	0.711628	0	0	3.432485875706215	4.2683706976058575	PACS2
Monosaccharide Metabolic Process (GO:0005996)	1/6	0.288367	0.711628	0	0	3.432485875706215	4.2683706976058575	GSTO2
Myelin Maintenance (GO:0043217)	1/6	0.288367	0.711628	0	0	3.432485875706215	4.2683706976058575	MYRF
Negative Regulation of T Cell Differentiation (GO:0045581)	1/6	0.288367	0.711628	0	0	3.432485875706215	4.2683706976058575	MDK
Negative Regulation of Fatty Acid Oxidation (GO:0046322)	1/6	0.288367	0.711628	0	0	3.432485875706215	4.2683706976058575	APPL2
Negative Regulation of Glycogen Biosynthetic Process (GO:0045719)	1/6	0.288367	0.711628	0	0	3.432485875706215	4.2683706976058575	GSK3B
Negative Regulation of Leukocyte Apoptotic Process (GO:2000107)	1/6	0.288367	0.711628	0	0	3.432485875706215	4.2683706976058575	CXCL12
Negative Regulation of Membrane Protein Ectodomain Proteolysis (GO:0051045)	1/6	0.288367	0.711628	0	0	3.432485875706215	4.2683706976058575	TIMP2
Negative Regulation of Muscle Cell Differentiation (GO:0051148)	1/6	0.288367	0.711628	0	0	3.432485875706215	4.2683706976058575	ID2
Negative Regulation of Nitric Oxide Biosynthetic Process (GO:0045019)	1/6	0.288367	0.711628	0	0	3.432485875706215	4.2683706976058575	PTGIS
Negative Regulation of Nitric Oxide Metabolic Process (GO:1904406)	1/6	0.288367	0.711628	0	0	3.432485875706215	4.2683706976058575	PTGIS
Negative Regulation of Protein-Containing Complex Disassembly (GO:0043242)	1/6	0.288367	0.711628	0	0	3.432485875706215	4.2683706976058575	TMEM39A
- Reg of Single Stranded Viral RNA Replication via Double Stranded DNA Intermediate (GO:0045869)	1/6	0.288367	0.711628	0	0	3.432485875706215	4.2683706976058575	APOBEC3B
Negative Regulation of Stress-Activated Protein Kinase Signaling Cascade (GO:0070303)	1/6	0.288367	0.711628	0	0	3.432485875706215	4.2683706976058575	MAP3K20
Nerve Growth Factor Signaling Pathway (GO:0038180)	1/6	0.288367	0.711628	0	0	3.432485875706215	4.2683706976058575	NTF3
Neuroepithelial Cell Differentiation (GO:0060563)	1/6	0.288367	0.711628	0	0	3.432485875706215	4.2683706976058575	SOX11
Neuron Projection Arborization (GO:0140058)	1/6	0.288367	0.711628	0	0	3.432485875706215	4.2683706976058575	NLGN1
Neurotrophin TRK Receptor Signaling Pathway (GO:0048011)	1/6	0.288367	0.711628	0	0	3.432485875706215	4.2683706976058575	HAP1
Placenta Blood Vessel Development (GO:0060674)	1/6	0.288367	0.711628	0	0	3.432485875706215	4.2683706976058575	ITGB8
Platelet Activating Factor Metabolic Process (GO:0046469)	1/6	0.288367	0.711628	0	0	3.432485875706215	4.2683706976058575	PLA2G7
Positive Regulation of B Cell Differentiation (GO:0045579)	1/6	0.288367	0.711628	0	0	3.432485875706215	4.2683706976058575	SYK
+ Reg of Blood Vessel Endothelial Cell Proliferation Inv in Sprouting Angiogenesis (GO:1903589)	1/6	0.288367	0.711628	0	0	3.432485875706215	4.2683706976058575	APELA
Positive Regulation of Cytoplasmic Translational Initiation (GO:1904690)	1/6	0.288367	0.711628	0	0	3.432485875706215	4.2683706976058575	SH3BGRL
Positive Regulation of Lipid Localization (GO:1905954)	1/6	0.288367	0.711628	0	0	3.432485875706215	4.2683706976058575	C3
Positive Regulation of Oligodendrocyte Differentiation (GO:0048714)	1/6	0.288367	0.711628	0	0	3.432485875706215	4.2683706976058575	MDK
Positive Regulation of Protein Autophosphorylation (GO:0031954)	1/6	0.288367	0.711628	0	0	3.432485875706215	4.2683706976058575	TOM1L1
Positive Regulation of Spindle Assembly (GO:1905832)	1/6	0.288367	0.711628	0	0	3.432485875706215	4.2683706976058575	NUMA1
Positive Regulation of Trophoblast Cell Migration (GO:1901165)	1/6	0.288367	0.711628	0	0	3.432485875706215	4.2683706976058575	APELA
Protein Localization to Ciliary Membrane (GO:1903441)	1/6	0.288367	0.711628	0	0	3.432485875706215	4.2683706976058575	WDR19
Protein Localization to Ciliary Transition Zone (GO:1904491)	1/6	0.288367	0.711628	0	0	3.432485875706215	4.2683706976058575	TCTN2
protein-DNA Complex Organization (GO:0071824)	1/6	0.288367	0.711628	0	0	3.432485875706215	4.2683706976058575	TCF7L2
rDNA Heterochromatin Formation (GO:0000183)	1/6	0.288367	0.711628	0	0	3.432485875706215	4.2683706976058575	SIRT1
Regulation of Bile Acid Biosynthetic Process (GO:0070857)	1/6	0.288367	0.711628	0	0	3.432485875706215	4.2683706976058575	SIRT1
Regulation of Cell Activation (GO:0050865)	1/6	0.288367	0.711628	0	0	3.432485875706215	4.2683706976058575	SYK
Regulation of Chemokine-Mediated Signaling Pathway (GO:0070099)	1/6	0.288367	0.711628	0	0	3.432485875706215	4.2683706976058575	SLIT2
Protein Autophosphorylation (GO:0046777)	8/114	0.292259	0.711628	0	0	1.2973380346136247	1.5958748429313225	EPHA4;GSK3B;PEAK1;STK26;TYRO3;MAP3K20;EIF2AK3;FGFR2
Chloride Transport (GO:0006821)	4/50	0.296431	0.711628	0	0	1.4936786925686094	1.816227045144624	CLCN5;TTYH1;CLCNKB;SLC12A7
Fatty Acid Catabolic Process (GO:0009062)	4/50	0.296431	0.711628	0	0	1.4936786925686094	1.816227045144624	HADHA;PHYH;PCCA;ABHD3
Positive Regulation of Cell-Substrate Adhesion (GO:0010811)	4/50	0.296431	0.711628	0	0	1.4936786925686094	1.816227045144624	GSK3B;MDK;NCOA3;DOCK1
Protein K48-linked Ubiquitination (GO:0070936)	6/82	0.297613	0.711628	0	0	1.3565920491128247	1.6441357613952832	UBE2H;HACE1;UBE2E1;ANAPC4;KLHL3;TRIM45
Cellular Response to Decreased Oxygen Levels (GO:0036294)	5/66	0.298439	0.711628	0	0	1.4082293219076005	1.70281586179626	PTGIS;TBL2;CITED2;SIRT1;HIPK2
Monoatomic Ion Transport (GO:0006811)	5/66	0.298439	0.711628	0	0	1.4082293219076005	1.70281586179626	SLC9A8;PIEZO2;SLC5A12;SLC12A7;SLC8B1
Endomembrane System Organization (GO:0010256)	11/165	0.301208	0.711628	0	0	1.228203029062628	1.473788073129879	RAB2B;SPTBN5;HACE1;ATL3;FBXW8;GOLGB1;EIF2AK3;VPS13B;MIA3;SPTSSB;ANK3
Regulation of Interleukin-10 Production (GO:0032653)	2/20	0.302781	0.711628	0	0	1.9075907590759076	2.2790832187201224	SYK;CD46
Regulation of Myelination (GO:0031641)	2/20	0.302781	0.711628	0	0	1.9075907590759076	2.2790832187201224	MYRF;EIF2AK3
Axon Extension (GO:0048675)	2/20	0.302781	0.711628	0	0	1.9075907590759076	2.2790832187201224	NLGN3;SLIT2
Regulation of Protein Export From Nucleus (GO:0046825)	2/20	0.302781	0.711628	0	0	1.9075907590759076	2.2790832187201224	BARD1;GSK3B
Cardiac Muscle Contraction (GO:0060048)	2/20	0.302781	0.711628	0	0	1.9075907590759076	2.2790832187201224	KCNE5;TNNI1
Chondrocyte Differentiation (GO:0002062)	2/20	0.302781	0.711628	0	0	1.9075907590759076	2.2790832187201224	CREB3L2;EIF2AK3
Superoxide Metabolic Process (GO:0006801)	2/20	0.302781	0.711628	0	0	1.9075907590759076	2.2790832187201224	PREX1;NOXA1
Limb Development (GO:0060173)	2/20	0.302781	0.711628	0	0	1.9075907590759076	2.2790832187201224	SALL1;MAP3K20
Microautophagy (GO:0016237)	2/20	0.302781	0.711628	0	0	1.9075907590759076	2.2790832187201224	ATG4B;SNX30
Negative Regulation of Intrinsic Apoptotic Signaling Pathway in Response to DNA Damage (GO:1902230)	2/20	0.302781	0.711628	0	0	1.9075907590759076	2.2790832187201224	CXCL12;SIRT1
Photoperiodism (GO:0009648)	2/20	0.302781	0.711628	0	0	1.9075907590759076	2.2790832187201224	PER3;ID2
Positive Regulation of ATP Metabolic Process (GO:1903580)	2/20	0.302781	0.711628	0	0	1.9075907590759076	2.2790832187201224	MIA3;PSEN1
Post-Transcriptional Gene Silencing (GO:0016441)	2/20	0.302781	0.711628	0	0	1.9075907590759076	2.2790832187201224	MOV10;AGO4
Protein Localization to Cell Surface (GO:0034394)	2/20	0.302781	0.711628	0	0	1.9075907590759076	2.2790832187201224	GGA1;ANK2
Protein Localization to Centrosome (GO:0071539)	2/20	0.302781	0.711628	0	0	1.9075907590759076	2.2790832187201224	CCDC14;GOLGB1
B Cell Differentiation (GO:0030183)	3/35	0.303404	0.711628	0	0	1.6099504249291785	1.920170905259715	CLSTN1;RABL3;PTPRJ
Regulation of Microtubule Cytoskeleton Organization (GO:0070507)	3/35	0.303404	0.711628	0	0	1.6099504249291785	1.920170905259715	GSK3B;TAOK1;EFNA5
Cellular Response to BMP Stimulus (GO:0071773)	3/35	0.303404	0.711628	0	0	1.6099504249291785	1.920170905259715	HIVEP1;ACVR2B;ACVR2A
Synaptic Vesicle Cycle (GO:0099504)	3/35	0.303404	0.711628	0	0	1.6099504249291785	1.920170905259715	NLGN1;SYN3;SLC18A2
Pattern Recognition Receptor Signaling Pathway (GO:0002221)	3/35	0.303404	0.711628	0	0	1.6099504249291785	1.920170905259715	RNF144A;RPS6KA3;SYK
Peptidyl-Tyrosine Modification (GO:0018212)	3/35	0.303404	0.711628	0	0	1.6099504249291785	1.920170905259715	EPHA4;SYK;FGFR2
Epithelium Development (GO:0060429)	6/83	0.307359	0.711628	0	0	1.3388631283368126	1.579507021694252	TRIM71;APELA;TGFB2;SALL1;HNRNPH3;FGFR2
Anterograde Trans-Synaptic Signaling (GO:0098916)	8/116	0.308623	0.711628	0	0	1.2731019178950704	1.4967009370513409	NLGN3;RPS6KA3;DLG1;HTR7;DLGAP1;HAP1;SLC12A7;SLC18A2
B Cell Activation (GO:0042113)	4/51	0.309044	0.711628	0	0	1.4617775765806549	1.7165216456541024	C3;CLSTN1;RABL3;PTPRJ
Regulation of Phosphorylation (GO:0042325)	4/51	0.309044	0.711628	0	0	1.4617775765806549	1.7165216456541024	BARD1;NDUFS4;PSEN1;SIRT1
Regulation of Alternative mRNA Splicing, via Spliceosome (GO:0000381)	4/51	0.309044	0.711628	0	0	1.4617775765806549	1.7165216456541024	DDX17;TIA1;REST;ARGLU1
Epithelial Cell Differentiation (GO:0030855)	5/67	0.309367	0.711628	0	0	1.385401392961877	1.6253921967572644	TGFB2;MAF;JAG1;HNRNPH3;FGFR2
Positive Regulation of Protein Kinase Activity (GO:0045860)	5/67	0.309367	0.711628	0	0	1.385401392961877	1.6253921967572644	TOM1L1;CCDC88A;GPRC5B;TGFB2;DUSP19
Negative Regulation of Intracellular Signal Transduction (GO:1902532)	15/234	0.309937	0.711628	0	0	1.1781019304409617	1.3800134574543759	GSK3B;USP49;PAQR3;PTPRJ;SIRT1;DUSP6;STRN3;PREX2;PREX1;CYP26A1;SPRED1;PDE10A;MAP3K20;SLIT2;OTUD3
Positive Regulation of DNA-templated Transcription (GO:0045893)	55/931	0.311887	0.711628	0	0	1.0829039420217	1.2617054084411656	RET;CCNT2;CITED2;CHD6;MIA3;RSF1;RPS6KA3;MED14;SALL1;ZIC2;ZIC3;SOX15;CREB3L2;CEP290;DDX17;NCOA3;LMO3;ATRX;UBE2E1;SOX11;SIRT1;TGFBR1;MSL1;ASPH;TBL1XR1;ZNF711;SOS1;MYRF;PSEN1;NR2C2;STRN3;NHLH2;HLTF;HIVEP1;APBB2;MTA3;ATF7IP;TCF7L2;TGFB2;JAG1;FZD4;CNBP;EIF2AK3;NR1D2;SMARCA1;USF3;PBX1;ACVR2A;HIPK2;BCL9;REST;ID2;SSBP2;OGT;FGFR2
Positive Regulation of RNA Biosynthetic Process (GO:1902680)	26/424	0.313813	0.711628	0	0	1.1246128151739665	1.3033780623428943	RET;MYRF;CITED2;RSF1;PSEN1;MED14;SALL1;ZIC2;ZIC3;CREB3L2;CEP290;MTA3;ATF7IP;TCF7L2;FZD4;CNBP;NR1D2;SMARCA1;TGFBR1;MSL1;REST;ASPH;TBL1XR1;ID2;ZNF711;OGT
Regulation of Response to External Stimulus (GO:0032101)	6/84	0.31716	0.711628	0	0	1.3215887952730059	1.5176454324832716	ARMH4;PGAP1;ELMOD2;ERAP1;NR1D2;APPL2
RNA Stabilization (GO:0043489)	3/36	0.318763	0.711628	0	0	1.5610352819984548	1.7847425000180257	CPAMD8;IGF2BP2;TRDMT1
Regulation of Metabolic Process (GO:0019222)	3/36	0.318763	0.711628	0	0	1.5610352819984548	1.7847425000180257	TCF7L2;BRIP1;NOXA1
Cell Chemotaxis (GO:0060326)	3/36	0.318763	0.711628	0	0	1.5610352819984548	1.7847425000180257	CXCL12;NCOA3;SOS1
Ceramide Metabolic Process (GO:0006672)	3/36	0.318763	0.711628	0	0	1.5610352819984548	1.7847425000180257	ACER3;SPTSSB;PLPP2
Positive Regulation of Protein Transport (GO:0051222)	4/52	0.321709	0.711628	0	0	1.4312056737588652	1.6231398504302863	TGFB2;ASPH;CEP290;APBB3
Negative Regulation of Response to External Stimulus (GO:0032102)	7/101	0.322062	0.711628	0	0	1.2795356731526943	1.4497268226349673	EPHA4;PTPRS;PTGIS;TYRO3;MIA3;CTNNA2;TRIM45
DNA Repair-Dependent Chromatin Remodeling (GO:0140861)	2/21	0.323488	0.711628	0	0	1.8070423583711754	2.039416515869982	USP3;SIRT1
Regulation of Insulin Secretion Involved in Cellular Response to Glucose Stimulus (GO:0061178)	2/21	0.323488	0.711628	0	0	1.8070423583711754	2.039416515869982	EFNA5;CDK16
Regulation of Long-Term Synaptic Potentiation (GO:1900271)	2/21	0.323488	0.711628	0	0	1.8070423583711754	2.039416515869982	GSK3B;EPHA4
Wnt Signaling Pathway, Planar Cell Polarity Pathway (GO:0060071)	2/21	0.323488	0.711628	0	0	1.8070423583711754	2.039416515869982	FZD6;CELSR1
Amino Acid Metabolic Process (GO:0006520)	2/21	0.323488	0.711628	0	0	1.8070423583711754	2.039416515869982	PCCA;BPHL
Regulation of Release of Sequestered Calcium Ion Into Cytosol by Sarcoplasmic Reticulum (GO:0010880)	2/21	0.323488	0.711628	0	0	1.8070423583711754	2.039416515869982	ASPH;ANK2
Cellular Response to Hexose Stimulus (GO:0071331)	2/21	0.323488	0.711628	0	0	1.8070423583711754	2.039416515869982	ZNF236;OGT
Epithelial Tube Morphogenesis (GO:0060562)	2/21	0.323488	0.711628	0	0	1.8070423583711754	2.039416515869982	PODXL;SLIT2
Glutamine Family Amino Acid Metabolic Process (GO:0009064)	2/21	0.323488	0.711628	0	0	1.8070423583711754	2.039416515869982	DGLUCY;RIMKLB
Heart Looping (GO:0001947)	2/21	0.323488	0.711628	0	0	1.8070423583711754	2.039416515869982	ZIC3;CCDC40
Intrinsic Apoptotic Signaling Pathway in Response to DNA Damage by P53 Class Mediator (GO:0042771)	2/21	0.323488	0.711628	0	0	1.8070423583711754	2.039416515869982	SIRT1;HIPK2
Keratinocyte Differentiation (GO:0030216)	2/21	0.323488	0.711628	0	0	1.8070423583711754	2.039416515869982	JAG1;AKR1C3
Negative Regulation of Axonogenesis (GO:0050771)	2/21	0.323488	0.711628	0	0	1.8070423583711754	2.039416515869982	PTPRS;SEMA6D
Peptide Hormone Processing (GO:0016486)	2/21	0.323488	0.711628	0	0	1.8070423583711754	2.039416515869982	BCHE;PLA2G7
Positive Regulation of ERBB Signaling Pathway (GO:1901186)	2/21	0.323488	0.711628	0	0	1.8070423583711754	2.039416515869982	CCDC88A;HAP1
Positive Regulation of Cellular Response to Transforming Growth Factor Beta Stimulus (GO:1903846)	2/21	0.323488	0.711628	0	0	1.8070423583711754	2.039416515869982	CITED2;HIPK2
Positive Regulation of Reproductive Process (GO:2000243)	2/21	0.323488	0.711628	0	0	1.8070423583711754	2.039416515869982	APELA;CACNA1H
Positive Regulation of Transforming Growth Factor Beta Receptor Signaling Pathway (GO:0030511)	2/21	0.323488	0.711628	0	0	1.8070423583711754	2.039416515869982	CITED2;HIPK2
Regulation of Calcium-Mediated Signaling (GO:0050848)	2/21	0.323488	0.711628	0	0	1.8070423583711754	2.039416515869982	PGAP1;PTPRJ
Regulation of Cell-Substrate Junction Assembly (GO:0090109)	2/21	0.323488	0.711628	0	0	1.8070423583711754	2.039416515869982	PEAK1;EFNA5
Protein Catabolic Process (GO:0030163)	6/85	0.327008	0.711628	0	0	1.3047517870968903	1.4584152289368735	FBXO2;RAB12;LAMP2;OGA;TCIRG1;CTSF
Regulation of Collateral Sprouting (GO:0048670)	1/7	0.327604	0.711628	0	0	2.860169491525424	3.191807334174284	PTPRS
CD40 Signaling Pathway (GO:0023035)	1/7	0.327604	0.711628	0	0	2.860169491525424	3.191807334174284	TRAF5
Regulation of Glutamate Receptor Signaling Pathway (GO:1900449)	1/7	0.327604	0.711628	0	0	2.860169491525424	3.191807334174284	NLGN3
NAD Biosynthetic Process via the Salvage Pathway (GO:0034355)	1/7	0.327604	0.711628	0	0	2.860169491525424	3.191807334174284	PTGIS
Regulation of Ketone Biosynthetic Process (GO:0010566)	1/7	0.327604	0.711628	0	0	2.860169491525424	3.191807334174284	AKR1C3
Regulation of Mononuclear Cell Migration (GO:0071675)	1/7	0.327604	0.711628	0	0	2.860169491525424	3.191807334174284	SLIT2
Amino Sugar Metabolic Process (GO:0006040)	1/7	0.327604	0.711628	0	0	2.860169491525424	3.191807334174284	ST6GAL1
Aminoglycan Catabolic Process (GO:0006026)	1/7	0.327604	0.711628	0	0	2.860169491525424	3.191807334174284	GNS
Antifungal Humoral Response (GO:0019732)	1/7	0.327604	0.711628	0	0	2.860169491525424	3.191807334174284	CPAMD8
Regulation of Nuclear Cell Cycle DNA Replication (GO:0033262)	1/7	0.327604	0.711628	0	0	2.860169491525424	3.191807334174284	ATRX
Apical Protein Localization (GO:0045176)	1/7	0.327604	0.711628	0	0	2.860169491525424	3.191807334174284	CELSR1
Aromatic Amino Acid Transport (GO:0015801)	1/7	0.327604	0.711628	0	0	2.860169491525424	3.191807334174284	SLC25A29
Regulation of Pattern Recognition Receptor Signaling Pathway (GO:0062207)	1/7	0.327604	0.711628	0	0	2.860169491525424	3.191807334174284	APPL2
Autophagosome-Lysosome Fusion (GO:0061909)	1/7	0.327604	0.711628	0	0	2.860169491525424	3.191807334174284	VPS39
Regulation of Protein Exit From Endoplasmic Reticulum (GO:0070861)	1/7	0.327604	0.711628	0	0	2.860169491525424	3.191807334174284	SORL1
Regulation of Protein Localization to Cell Cortex (GO:1904776)	1/7	0.327604	0.711628	0	0	2.860169491525424	3.191807334174284	NUMA1
Regulation of Protein Localization to Nucleolus (GO:1904749)	1/7	0.327604	0.711628	0	0	2.860169491525424	3.191807334174284	GLUL
Cardiocyte Differentiation (GO:0035051)	1/7	0.327604	0.711628	0	0	2.860169491525424	3.191807334174284	TGFB2
Catecholamine Biosynthetic Process (GO:0042423)	1/7	0.327604	0.711628	0	0	2.860169491525424	3.191807334174284	TGFB2
Regulation of Steroid Biosynthetic Process (GO:0050810)	1/7	0.327604	0.711628	0	0	2.860169491525424	3.191807334174284	SIRT1
Regulation of Stress-Activated Protein Kinase Signaling Cascade (GO:0070302)	1/7	0.327604	0.711628	0	0	2.860169491525424	3.191807334174284	MAP3K20
Regulation of Striated Muscle Tissue Development (GO:0016202)	1/7	0.327604	0.711628	0	0	2.860169491525424	3.191807334174284	SOX15
Regulation of Toll-Like Receptor 9 Signaling Pathway (GO:0034163)	1/7	0.327604	0.711628	0	0	2.860169491525424	3.191807334174284	PTPRS
Cellular Response to Hydroxyurea (GO:0072711)	1/7	0.327604	0.711628	0	0	2.860169491525424	3.191807334174284	SPIDR
Chloride Ion Homeostasis (GO:0055064)	1/7	0.327604	0.711628	0	0	2.860169491525424	3.191807334174284	SLC12A7
Response to Interleukin-6 (GO:0070741)	1/7	0.327604	0.711628	0	0	2.860169491525424	3.191807334174284	PTGIS
Response to Sterol (GO:0036314)	1/7	0.327604	0.711628	0	0	2.860169491525424	3.191807334174284	TGFBR1
Secondary Palate Development (GO:0062009)	1/7	0.327604	0.711628	0	0	2.860169491525424	3.191807334174284	TGFB2
Sex-Chromosome Dosage Compensation (GO:0007549)	1/7	0.327604	0.711628	0	0	2.860169491525424	3.191807334174284	LRIF1
Dopamine Transport (GO:0015872)	1/7	0.327604	0.711628	0	0	2.860169491525424	3.191807334174284	SLC18A2
Embryonic Appendage Morphogenesis (GO:0035113)	1/7	0.327604	0.711628	0	0	2.860169491525424	3.191807334174284	TGFB2
Endochondral Bone Morphogenesis (GO:0060350)	1/7	0.327604	0.711628	0	0	2.860169491525424	3.191807334174284	INPPL1
Superoxide Anion Generation (GO:0042554)	1/7	0.327604	0.711628	0	0	2.860169491525424	3.191807334174284	NOXA1
Synaptic Vesicle Docking (GO:0016081)	1/7	0.327604	0.711628	0	0	2.860169491525424	3.191807334174284	RIMS3
Epigenetic Programming in the Zygotic Pronuclei (GO:0044725)	1/7	0.327604	0.711628	0	0	2.860169491525424	3.191807334174284	ZNF445
Establishment of Planar Polarity (GO:0001736)	1/7	0.327604	0.711628	0	0	2.860169491525424	3.191807334174284	CELSR1
Extracellular Transport (GO:0006858)	1/7	0.327604	0.711628	0	0	2.860169491525424	3.191807334174284	CCDC40
Forebrain Neuron Development (GO:0021884)	1/7	0.327604	0.711628	0	0	2.860169491525424	3.191807334174284	FGFR2
Glutamine Metabolic Process (GO:0006541)	1/7	0.327604	0.711628	0	0	2.860169491525424	3.191807334174284	GLUL
Wound Healing, Spreading of Epidermal Cells (GO:0035313)	1/7	0.327604	0.711628	0	0	2.860169491525424	3.191807334174284	COL5A1
Granulocyte Activation (GO:0036230)	1/7	0.327604	0.711628	0	0	2.860169491525424	3.191807334174284	PREX1
Intracellular Triglyceride Homeostasis (GO:0035356)	1/7	0.327604	0.711628	0	0	2.860169491525424	3.191807334174284	SIRT1
Killing by Host of Symbiont Cells (GO:0051873)	1/7	0.327604	0.711628	0	0	2.860169491525424	3.191807334174284	GSDMB
Lipid Phosphorylation (GO:0046834)	1/7	0.327604	0.711628	0	0	2.860169491525424	3.191807334174284	DGKE
Macrophage Activation Involved in Immune Response (GO:0002281)	1/7	0.327604	0.711628	0	0	2.860169491525424	3.191807334174284	SYK
Microtubule-Based Transport (GO:0099111)	1/7	0.327604	0.711628	0	0	2.860169491525424	3.191807334174284	CCDC40
Monoatomic Anion Homeostasis (GO:0055081)	1/7	0.327604	0.711628	0	0	2.860169491525424	3.191807334174284	SLC12A7
[truncated: 1,515 more rows]

## Sheet: GOCC_Upregulated_in_8p
Term	Overlap	P-value	Adjusted P-value	Old P-value	Old Adjusted P-value	Odds Ratio	Combined Score	Genes
[truncated: 255 more rows]

[truncated: 4 more sheets: GOMF_Upregulated_in_8p, GOBP_Upregulated_in_21, GOCC_Upregulated_in_21, GOMF_Upregulated_in_21]
