# Supplementary material for: Chromosome engineering to correct a complex rearrangement on Chromosome 8 reveals the effects of 8p syndrome on gene expression and neural differentiation
Source: bioRxiv preprint, doi:10.1101/2024.11.17.624023, version 3 (2025-08-22)
Supplement: Table S6 [file 624023_file09.xlsx]

## Sheet: GOBP_Downregulated_in_both
Term	Overlap	P-value	Adjusted P-value	Old P-value	Old Adjusted P-value	Odds Ratio	Combined Score	Genes
Ribosome Biogenesis (GO:0042254)	23/148	4.65427e-14	6.43685e-11	0	0	9.32790243902439	286.3517447890257	LTV1;NOP14;UTP6;DDX49;NOP16;UTP4;DIMT1;PAK1IP1;HEATR1;GTF3A;IMP4;URB2;BOP1;RPS17;EMG1;GRWD1;EXOSC9;XRN2;DHX37;RRS1;RRP36;UTP20;DHX29
Ribonucleoprotein Complex Biogenesis (GO:0022613)	19/112	1.59239e-12	1.10114e-09	0	0	10.217505376344086	277.5665544820348	LTV1;NOP14;UTP6;NOP16;UTP4;DIMT1;PAK1IP1;HEATR1;GTF3A;IMP4;URB2;BOP1;RPS17;EMG1;GRWD1;DHX37;RRS1;RRP36;UTP20
Maturation of SSU-rRNA Frm Tricistronic rRNA Trnscpt (GO:0000462)	9/26	1.53026e-09	7.05451e-07	0	0	25.613348416289593	519.8953124811928	NOP14;UTP6;UTP4;HEATR1;DHX37;RRS1;RRP36;UTP20;NOP9
Ribosomal Small Subunit Biogenesis (GO:0042274)	13/82	1.34786e-08	4.66022e-06	0	0	9.219372735507246	167.07499022220537	LTV1;NOP14;UTP6;UTP4;DIMT1;HEATR1;IMP4;RPS17;EMG1;DHX37;RRP36;UTP20;NOL11
Regulation of DNA-templated DNA Replication (GO:0090329)	6/13	1.19929e-07	3.31723e-05	0	0	41.02878870179251	653.8498257414757	TIPIN;MCM7;MCM3;MCM4;MCM5;MCM6
Maturation of SSU-rRNA (GO:0030490)	8/37	7.51432e-07	0.000153982	0	0	13.28260007927071	187.30173844896478	NOP14;UTP6;UTP4;HEATR1;DHX37;RRP36;IMP4;NOL11
Double-Strand Break Repair via Break-Induced Replication (GO:0000727)	5/10	8.90712e-07	0.000153982	0	0	47.69318181818182	664.4253618819952	MCM7;MCM3;MCM4;MCM5;MCM6
Regulation of DNA-templated DNA Replication Initiation (GO:0030174)	5/10	8.90712e-07	0.000153982	0	0	47.69318181818182	664.4253618819952	MCM7;MCM3;MCM4;MCM5;MCM6
rRNA Metabolic Process (GO:0016072)	11/89	2.34834e-06	0.000360861	0	0	6.842476644802226	88.69082915688594	RPS17;EMG1;NOP14;DDX49;EXOSC9;XRN2;HEATR1;GTF3A;RRP36;IMP4;UTP20
mRNA Splicing, via Spliceosome (GO:0000398)	16/198	4.06705e-06	0.000562474	0	0	4.313599444034226	53.54294773398637	HSPA8;SF3B3;DDX46;NCBP1;DHX9;DDX20;PLRG1;HNRNPM;DDX39A;PHF5A;PUF60;U2AF2;HNRNPF;GEMIN5;TXNL4A;SNRPB
Endonuc Clvg in ITS1 to Sep SSU-rRNA Fm 5.8S rRNA and LSU-rRNA Fm Tricist rRNA Trnscpt (GO:0000447)	4/7	6.22644e-06	0.000782833	0	0	63.36100628930818	759.4897875962608	NOP14;RRS1;UTP20;NOP9
rRNA Processing (GO:0006364)	11/104	1.08755e-05	0.0012534	0	0	5.731974660331749	65.51073243811302	RPS17;EMG1;NOP14;DDX49;UTP4;EXOSC9;XRN2;RRP36;IMP4;UTP20;NOL11
protein-RNA Complex Assembly (GO:0022618)	12/129	1.62967e-05	0.00173372	0	0	4.980145664970568	54.90384797587296	BOP1;EIF3M;NCBP1;PUF60;DHX9;U2AF2;RRS1;DDX20;GEMIN5;DHX29;TXNL4A;SNRPB
RNA Catabolic Process (GO:0006401)	9/73	2.01462e-05	0.00199016	0	0	6.778125	73.28843783513938	SUPV3L1;FEN1;PNPT1;NCBP1;WDR82;C1QBP;EXOSC9;XRN2;PPP1R8
Maturation of 5.8S rRNA Frm Tricistronic rRNA Trnscpt (GO:0000466)	5/18	2.63941e-05	0.00243354	0	0	18.331876456876458	193.26139706880465	NOP14;EXOSC9;RRS1;UTP20;NOP9
RNA Splicing, via Transesterification Reactions With Bulged Adenosine as Nucleophile (GO:0000377)	13/161	3.31775e-05	0.0027035	0	0	4.271114864864865	44.050738645961914	HSPA8;SF3B3;DDX46;NCBP1;PLRG1;HNRNPM;DDX39A;PHF5A;U2AF2;HNRNPF;GEMIN5;TXNL4A;SNRPB
DNA Replication Initiation (GO:0006270)	5/19	3.52114e-05	0.0027035	0	0	17.021103896103895	174.53677073277734	MCM7;MCM3;MCM10;MCM5;CDC6
Mitotic DNA Replication (GO:1902969)	4/10	3.55466e-05	0.0027035	0	0	31.67295597484277	324.4788122346221	MCM7;MCM3;MCM4;MCM6
Spliceosomal Complex Assembly (GO:0000245)	8/61	3.71413e-05	0.0027035	0	0	7.253957926697029	73.99603795991835	SF3B3;PHF5A;DDX46;NCBP1;PUF60;U2AF2;TXNL4A;SNRPB
Nucleic Acid Catabolic Process (GO:0141188)	6/34	6.49686e-05	0.00435955	0	0	10.240086909288431	98.73088279665284	SUPV3L1;PNPT1;NCBP1;EXOSC9;PPP1R8;XRN2
DNA Replication (GO:0006260)	8/66	6.6197e-05	0.00435955	0	0	6.62597436913727	63.760925308028476	FEN1;DUT;MCM7;GRWD1;POLR1B;MCM4;MCM5;MCM6
DNA Strand Elongation Involved in DNA Replication (GO:0006271)	4/12	8.10609e-05	0.00509578	0	0	23.750943396226415	223.74124451090833	PCNA;MCM7;MCM3;MCM4
Endonucleolytic Clvg of Tricistronic rRNA Trnscpt (GO:0000479)	4/13	0.000115168	0.00692511	0	0	21.11027253668763	191.45153267698703	NOP14;RRS1;UTP20;NOP9
RNA Processing (GO:0006396)	16/267	0.000158094	0.00911015	0	0	3.110404232870888	27.22326062298649	NOP14;SF3B3;DDX49;NCBP1;YJU2;DDX20;IMP4;RPS17;EMG1;U2AF2;HNRNPF;EXOSC9;XRN2;RRP36;UTP20;SNRPB
RNA Metabolic Process (GO:0016070)	7/58	0.000195395	0.0108092	0	0	6.571995210297859	56.1280550920797	SUPV3L1;PNPT1;NCBP1;EXOSC9;XRN2;HEATR1;PPP1R8
Positive Regulation of Transcription by RNA Polymerase I (GO:0045943)	5/32	0.000488269	0.0257127	0	0	8.816638608305276	67.22372487260915	DHX33;MYBBP1A;HEATR1;NOL11;ATF4
DNA Metabolic Process (GO:0006259)	15/267	0.000501983	0.0257127	0	0	2.892763404574428	21.976164877566525	FEN1;DUT;MCM7;MCM10;CDC6;SUPV3L1;GRWD1;POLR1B;PSME4;UBE2N;MCM3;MCM4;MCM5;MCM6;DCTPP1
mRNA Processing (GO:0006397)	13/212	0.000521884	0.0257773	0	0	3.163493247487437	23.90988982138648	HSPA8;SF3B3;DDX46;NCBP1;PLRG1;HNRNPM;DDX39A;PHF5A;U2AF2;HNRNPF;GEMIN5;TXNL4A;SNRPB
Alternative mRNA Splicing, via Spliceosome (GO:0000380)	4/19	0.000565497	0.0260694	0	0	12.660125786163523	94.6699694082304	HNRNPM;NCBP1;PUF60;DHX9
Positive Regulation of RNA Metabolic Process (GO:0051254)	4/19	0.000565497	0.0260694	0	0	12.660125786163523	94.6699694082304	SUPV3L1;PNPT1;DIMT1;HEATR1
DNA-templated DNA Replication (GO:0006261)	6/51	0.000646403	0.0288379	0	0	6.362991128010139	46.7303652979657	MCM7;MCM3;MCM4;MCM10;MCM5;CDC6
Fatty Acid Transport (GO:0015908)	4/22	0.00101586	0.0439043	0	0	10.547589098532494	72.69415938686407	LYN;SLC25A17;FABP5;SLC27A4
U2-type Prespliceosome Assembly (GO:1903241)	4/23	0.0012097	0.0506974	0	0	9.991658391261172	67.11779973981088	SF3B3;PHF5A;DDX46;SNRPB
Gene Expression (GO:0010467)	16/330	0.00158668	0.0645404	0	0	2.4736537348002314	15.945453985557242	MRPS15;NCBP1;DDX20;MRPL32;NUP160;MRPL11;MRPL3;NXF1;RPS17;DDX39A;HNRNPF;EXOSC9;XRN2;MRRF;EIF4E;FARSB
DNA Strand Elongation (GO:0022616)	3/12	0.00172913	0.0668488	0	0	15.773182957393484	100.31958046587248	MCM7;MCM3;MCM4
Ribosomal Large Subunit Biogenesis (GO:0042273)	5/42	0.0017401	0.0668488	0	0	6.428644553644554	40.8464111027222	BOP1;NOP16;PAK1IP1;RRS1;GTF3A
Double-Strand Break Repair via Homologous Recombination (GO:0000724)	8/108	0.00191056	0.0707624	0	0	3.830191570881226	23.97836916851968	FEN1;MCM7;POLR1B;UBE2N;MCM3;MCM4;MCM5;MCM6
Regulation of Transcription by RNA Polymerase III (GO:0006359)	4/26	0.0019443	0.0707624	0	0	8.627101200686106	53.85771376962648	ZNF143;ICE1;MYBBP1A;POLR3G
Protein Alkylation (GO:0008213)	3/13	0.00221332	0.0784879	0	0	14.194736842105263	86.77611355304994	ETF1;FAM98A;SNRPB
Negative Regulation of mRNA Splicing, via Spliceosome (GO:0048025)	3/14	0.00277371	0.0959009	0	0	12.903280929596718	75.96897346057264	PTBP1;U2AF2;C1QBP
Regulation of Transcription by RNA Polymerase I (GO:0006356)	4/30	0.00333837	0.107307	0	0	7.297532656023222	41.612518359383806	DHX33;MYBBP1A;HEATR1;ATF4
Negative Regulation of mRNA Processing (GO:0050686)	3/15	0.00341396	0.107307	0	0	11.827067669172932	67.17636379167075	PTBP1;U2AF2;C1QBP
Regulation of mRNA Metabolic Process (GO:1903311)	3/15	0.00341396	0.107307	0	0	11.827067669172932	67.17636379167075	NCBP1;SLTM;DHX9
Regulation of RIG-I Signaling Pathway (GO:0039535)	3/15	0.00341396	0.107307	0	0	11.827067669172932	67.17636379167075	USP15;C1QBP;UFD1
Regulation of Signal Transduction by P53 Class Mediator (GO:1901796)	5/50	0.00378527	0.116334	0	0	5.282407407407407	29.458077549294597	BOP1;COPS3;PAK1IP1;RRS1;URB2
Positive Regulation of Transcription by RNA Polymerase III (GO:0045945)	3/16	0.00413741	0.117273	0	0	10.916425679583574	59.90589774485593	ZNF143;ICE1;MYBBP1A
Mitochondrial Calcium Ion Transmembrane Transport (GO:0006851)	3/16	0.00413741	0.117273	0	0	10.916425679583574	59.90589774485593	HSPA9;LETM1;MCUB
Dicarboxylic Acid Biosynthetic Process (GO:0043650)	2/5	0.00417802	0.117273	0	0	31.44319600499376	172.2432534921201	MTHFD1;MTHFD1L
Mitochondrial RNA Catabolic Process (GO:0000957)	2/5	0.00417802	0.117273	0	0	31.44319600499376	172.2432534921201	SUPV3L1;PNPT1
'De Novo' Post-Translational Protein Folding (GO:0051084)	4/32	0.00423981	0.117273	0	0	6.775202156334232	37.01453948546075	HSPA9;CCT2;HSPA8;TCP1
Translation (GO:0006412)	11/208	0.00437788	0.118718	0	0	2.683449415653406	14.574326948930091	MRPL3;RPS17;MRPS15;MARS2;RPL22L1;ETF1;ABCE1;MRRF;MRPL32;MRPL11;FARSB
mRNA Export From Nucleus (GO:0006406)	5/52	0.00448904	0.119391	0	0	5.056818181818182	27.337746509096817	NXF1;DDX39A;NCBP1;EIF4E;NUP160
mRNA Transport (GO:0051028)	5/54	0.0052813	0.137812	0	0	4.849644403215832	25.429512631473848	NXF1;DDX39A;NCBP1;EIF4E;NUP160
Negative Regulation of Muscle Cell Differentiation (GO:0051148)	2/6	0.00618076	0.155418	0	0	23.580524344569287	119.93795873757243	PTBP1;RBPMS2
Mitochondrial RNA 3'-End Processing (GO:0000965)	2/6	0.00618076	0.155418	0	0	23.580524344569287	119.93795873757243	SUPV3L1;PNPT1
Negative Regulation of RNA Splicing (GO:0033119)	3/19	0.00683581	0.16882	0	0	8.867481203007518	44.20953681600828	PTBP1;U2AF2;C1QBP
Ribosome Assembly (GO:0042255)	4/37	0.00717812	0.174164	0	0	5.746369353916524	28.368204394999143	C1QBP;DHX37;RRS1;DHX29
Import Into the Mitochondrion (GO:0170036)	4/38	0.00789332	0.188215	0	0	5.576914539400666	27.001959110314367	HSPA9;PNPT1;MCUB;TIMM44
RNA Export From Nucleus (GO:0006405)	5/60	0.00824485	0.193265	0	0	4.318526170798898	20.72100575299429	NXF1;DDX39A;NCBP1;EIF4E;NUP160
Granulocyte Differentiation (GO:0030851)	2/7	0.00853415	0.196712	0	0	18.862921348314607	89.85691745331046	LYN;LBR
Regulation of mRNA Splicing, via Spliceosome (GO:0048024)	6/85	0.00871643	0.196999	0	0	3.614670067863503	17.14273715935075	PTBP1;NCBP1;PUF60;U2AF2;C1QBP;RBPMS2
Positive Regulation of Growth (GO:0045927)	5/61	0.00883146	0.196999	0	0	4.241071428571429	20.05787163220485	SUPV3L1;DDX49;NCBP1;EXOSC9;CRK
Monocarboxylic Acid Transport (GO:0015718)	4/40	0.00946061	0.207683	0	0	5.266247379454927	24.543972087219792	LYN;SLC25A17;FABP5;SLC27A4
Transport Across Blood-Brain Barrier (GO:0150104)	5/63	0.01009	0.218038	0	0	4.094174503657262	18.817702081311754	SLC22A3;TFRC;FABP5;SLC38A5;SLC27A4
Postreplication Repair (GO:0006301)	3/22	0.0103747	0.220742	0	0	7.465571824297586	34.10558704707459	PCNA;UBE2N;DTL
Regulation of Sister Chromatid Cohesion (GO:0007063)	2/8	0.0112228	0.231658	0	0	15.71785268414482	70.57019799418187	FEN1;ESPL1
Protein Localization to Nucleolus (GO:1902570)	2/8	0.0112228	0.231658	0	0	15.71785268414482	70.57019799418187	HEATR1;RRS1
Macromolecule Methylation (GO:0043414)	3/23	0.0117495	0.232136	0	0	7.091729323308271	31.515260462777942	ETF1;FAM98A;SNRPB
Mismatch Repair (GO:0006298)	3/23	0.0117495	0.232136	0	0	7.091729323308271	31.515260462777942	PCNA;POLR1B;MLH1
Mitochondrial RNA Metabolic Process (GO:0000959)	3/23	0.0117495	0.232136	0	0	7.091729323308271	31.515260462777942	SUPV3L1;PNPT1;POLRMT
Lipid Transport (GO:0006869)	5/66	0.0122002	0.237646	0	0	3.891890213611525	17.14885120895556	LYN;PRELID1;SLC25A17;FABP5;SLC27A4
Nuclear Export (GO:0051168)	4/44	0.0131716	0.250531	0	0	4.73811320754717	20.51458577272312	LSG1;DDX39A;XPO6;NUTF2
Protein Methylation (GO:0006479)	3/24	0.013224	0.250531	0	0	6.753490870032223	29.21373033899481	ETF1;FAM98A;SNRPB
Embryonic Cranial Skeleton Morphogenesis (GO:0048701)	2/9	0.0142316	0.262432	0	0	13.471375066880684	57.28415532875399	MTHFD1;MTHFD1L
Positive Regulation of rRNA Processing (GO:2000234)	2/9	0.0142316	0.262432	0	0	13.471375066880684	57.28415532875399	DIMT1;HEATR1
Positive Regulation of Microtubule Polymerization or Depolymerization (GO:0031112)	3/25	0.0147992	0.265809	0	0	6.446001367053999	27.158172675978026	NAV3;SLTM;KATNB1
Glycosaminoglycan Metabolic Process (GO:0030203)	3/25	0.0147992	0.265809	0	0	6.446001367053999	27.158172675978026	DDX18;CLN6;HS3ST2
mRNA Catabolic Process (GO:0006402)	4/46	0.0153301	0.270534	0	0	4.511769991015274	18.849902796827376	SUPV3L1;PNPT1;EXOSC9;XRN2
Hemopoiesis (GO:0030097)	5/70	0.0154535	0.270534	0	0	3.6512237762237763	15.225305351205304	PRDX3;LYN;ARMC6;ARIH2;ATF4
Phosphate Ion Transport (GO:0006817)	2/10	0.0175463	0.302197	0	0	11.786516853932584	47.65182074890804	SLC20A2;SLC20A1
RNA Methylation (GO:0001510)	4/48	0.0176992	0.302197	0	0	4.3060034305317325	17.371439606781394	DIMT1;THADA;MTO1;SNRPB
Positive Regulation of Microtubule Polymerization (GO:0031116)	3/27	0.0182548	0.307882	0	0	5.907894736842105	23.651245794638363	NAV3;SLTM;PDE4DIP
Positive Regulation of NF-kappaB Transcription Factor Activity (GO:0051092)	5/74	0.0192407	0.3206	0	0	3.4384606938954767	13.584429163491818	PRDX3;DHX33;CHUK;DHX9;UBE2N
Pronephros Development (GO:0048793)	1/1	0.0209093	0.325049	0	0	Infinity	Infinity	SEC61A1
Regulation of Antigen Processing and Presentation (GO:0002577)	1/1	0.0209093	0.325049	0	0	Infinity	Infinity	YTHDF1
Regulation of Leukocyte Activation (GO:0002694)	2/11	0.0211529	0.325049	0	0	10.476071577195173	40.39552727228834	LYN;MCUB
Calcium Import Into the Mitochondrion (GO:0036444)	2/11	0.0211529	0.325049	0	0	10.476071577195173	40.39552727228834	HSPA9;MCUB
Pyrimidine Deoxyribonucleotide Catabolic Process (GO:0009223)	2/11	0.0211529	0.325049	0	0	10.476071577195173	40.39552727228834	DUT;UNG
Mitochondrial RNA Processing (GO:0000963)	2/11	0.0211529	0.325049	0	0	10.476071577195173	40.39552727228834	SUPV3L1;PNPT1
Regulation of Cellular Respiration (GO:0043457)	2/11	0.0211529	0.325049	0	0	10.476071577195173	40.39552727228834	PRELID1;PNPT1
Positive Regulation of Type I Interferon Production (GO:0032481)	4/51	0.0216595	0.329177	0	0	4.030188679245283	15.444930464077984	CHUK;DHX33;DHX9;POLR3G
Protein K63-linked Ubiquitination (GO:0070534)	4/52	0.0230904	0.347109	0	0	3.9459119496855344	14.869529283751405	KCMF1;ARIH2;UBE2N;ZNF598
Maturation of LSU-rRNA Frm Tricistronic rRNA Trnscpt (GO:0000463)	2/12	0.0250376	0.372333	0	0	9.427715355805244	34.7635339780441	DDX18;PAK1IP1
Transcription by RNA Polymerase III (GO:0006383)	3/31	0.0263966	0.388367	0	0	5.062298603651987	18.39902170282109	ICE1;GTF3A;POLR3G
Macromolecule Biosynthetic Process (GO:0009059)	8/172	0.0281896	0.410382	0	0	2.3235211662461452	8.2921845494048	DDX18;MRPL3;RPS17;MRPS15;MRRF;MRPL32;MRPL11;FARSB
Regulation of Erythrocyte Differentiation (GO:0045646)	3/32	0.0286887	0.413297	0	0	4.887347679543687	17.35620131120996	HSPA9;LYN;ETS1
Nuclear RNA Surveillance (GO:0071027)	2/13	0.0291875	0.416147	0	0	8.56996935648621	30.286401917295393	WDR82;EXOSC9
Regulation of mRNA Processing (GO:0050684)	3/33	0.0310829	0.436289	0	0	4.72406015037594	16.39766893690342	NCBP1;SLTM;DHX9
RNA Splicing (GO:0008380)	5/84	0.0312311	0.436289	0	0	3.0008151131568854	10.401849865171938	SF3B3;NCBP1;YJU2;TXNL4A;SNRPB
Regulation of rRNA Processing (GO:2000232)	2/14	0.0335898	0.455728	0	0	7.855181023720349	26.656816400427225	DIMT1;HEATR1
Regulation of RNA Export From Nucleus (GO:0046831)	2/14	0.0335898	0.455728	0	0	7.855181023720349	26.656816400427225	DDX39A;DHX9
Mitochondrion Organization (GO:0007005)	6/115	0.0336112	0.455728	0	0	2.6135277496773295	8.86742821193167	PRDX3;SUPV3L1;LETM1;PNPT1;CLUH;GDAP1
Positive Regulation of Cell Growth (GO:0030307)	5/86	0.0340844	0.457658	0	0	2.9262532734754956	9.887562212448906	SUPV3L1;DDX49;NCBP1;EXOSC9;CRK
Response to UV (GO:0009411)	5/87	0.0355698	0.47301	0	0	2.8903362897265334	9.642911102600864	FEN1;PCNA;DTL;MAP4K3;ATF4
Cytoplasmic Translational Initiation (GO:0002183)	3/35	0.0361756	0.476485	0	0	4.4281015037593985	14.698503620696112	EIF3M;NCBP1;DHX29
Regulation of Defense Response to Virus (GO:0050688)	2/15	0.0382322	0.484645	0	0	7.250360126764621	23.665727875539464	DHX9;C1QBP
Lysosomal Lumen Acidification (GO:0007042)	2/15	0.0382322	0.484645	0	0	7.250360126764621	23.665727875539464	ATP6V0B;CLN6
Pyroptotic Inflammatory Response (GO:0070269)	2/15	0.0382322	0.484645	0	0	7.250360126764621	23.665727875539464	DHX9;DPP9
Regulation of Translational Initiation (GO:0006446)	4/61	0.0385382	0.484645	0	0	3.320489904005296	10.8118676418345	YTHDF1;NCBP1;BZW1;ZNF598
Spliceosomal snRNP Assembly (GO:0000387)	3/36	0.0388728	0.484645	0	0	4.293574846206425	13.943215266907966	DDX20;GEMIN5;SNRPB
Regulation of Translation (GO:0006417)	8/184	0.0396366	0.484645	0	0	2.1630094043887147	6.982198994794791	YTHDF1;NCBP1;DHX9;IFRD2;GEMIN5;ETF1;BZW1;EIF4E
Vascular Transport (GO:0010232)	4/62	0.0405445	0.484645	0	0	3.2629798308392974	10.459008639932271	SLC22A3;TFRC;SLC38A5;SLC27A4
Endothelial Cell Morphogenesis (GO:0001886)	1/2	0.0413831	0.484645	0	0	46.99626865671642	149.67764449640944	SLTM
Positive Regulation of Gonad Development (GO:1905941)	1/2	0.0413831	0.484645	0	0	46.99626865671642	149.67764449640944	DHX37
Positive Regulation of Male Gonad Development (GO:2000020)	1/2	0.0413831	0.484645	0	0	46.99626865671642	149.67764449640944	DHX37
Immune Response-Inhibiting Cell Surface Receptor Signaling Pathway (GO:0002767)	1/2	0.0413831	0.484645	0	0	46.99626865671642	149.67764449640944	LYN
Base-Excision Repair (GO:0006284)	3/37	0.0416694	0.484645	0	0	4.166961521450686	13.242555858099033	FEN1;POLR1B;UNG
Protein Monoubiquitination (GO:0006513)	3/37	0.0416694	0.484645	0	0	4.166961521450686	13.242555858099033	UBE2N;DTL;ZNF598
DNA Replication Checkpoint Signaling (GO:0000076)	2/16	0.0431029	0.484645	0	0	6.731942215088282	21.166331470775926	TIPIN;CDC6
Regulation of Myeloid Cell Differentiation (GO:0045637)	2/16	0.0431029	0.484645	0	0	6.731942215088282	21.166331470775926	HSPA9;LYN
Cellular Response to Steroid Hormone Stimulus (GO:0071383)	2/16	0.0431029	0.484645	0	0	6.731942215088282	21.166331470775926	HSPA8;NR3C1
Extracellular Matrix Assembly (GO:0085029)	2/16	0.0431029	0.484645	0	0	6.731942215088282	21.166331470775926	DDX18;GPM6B
Positive Regulation of Smoothened Signaling Pathway (GO:0045880)	2/16	0.0431029	0.484645	0	0	6.731942215088282	21.166331470775926	TEDC2;RAB34
Positive Regulation of DNA Biosynthetic Process (GO:2000573)	3/38	0.0445645	0.497038	0	0	4.047583243823845	12.591295095983298	CCT2;PCNA;TCP1
Regulation of Intracellular Signal Transduction (GO:1902531)	10/258	0.0449284	0.497088	0	0	1.922406277244987	5.964619400089373	LYN;BOP1;PAK1IP1;SPATA13;RRS1;WWC3;UBE2N;URB2;PPM1D;CRK
Positive Regulation of DNA-binding Transcription Factor Activity (GO:0051091)	6/124	0.0458152	0.500529	0	0	2.4124508603467163	7.437922766641932	PRDX3;TFDP1;DHX33;CHUK;DHX9;UBE2N
Negative Regulation of Microtubule Depolymerization (GO:0007026)	2/17	0.0481904	0.500529	0	0	6.282646691635455	19.052727264649334	NAV3;KATNB1
Negative Regulation of Nucleocytoplasmic Transport (GO:0046823)	2/17	0.0481904	0.500529	0	0	6.282646691635455	19.052727264649334	DDX39A;YWHAB
Long-Chain Fatty Acid Transport (GO:0015909)	2/17	0.0481904	0.500529	0	0	6.282646691635455	19.052727264649334	FABP5;SLC27A4
Mitochondrial Calcium Ion Homeostasis (GO:0051560)	2/17	0.0481904	0.500529	0	0	6.282646691635455	19.052727264649334	LETM1;MCUB
DNA Integrity Checkpoint Signaling (GO:0031570)	3/40	0.0506459	0.500529	0	0	3.828185328185328	11.419078753290021	LYN;TIPIN;CDC6
Positive Regulation of miRNA Metabolic Process (GO:2000630)	3/40	0.0506459	0.500529	0	0	3.828185328185328	11.419078753290021	PNPT1;NR3C1;ETS1
Mitochondrial Gene Expression (GO:0140053)	5/96	0.0507302	0.500529	0	0	2.6026057276057277	7.758975085645166	MRPL3;MRPS15;POLRMT;MRPL32;MRPL11
Negative Regulation of Cell Population Proliferation (GO:0008285)	10/264	0.0510399	0.500529	0	0	1.8760830571854195	5.581622299594634	LYN;TFDP1;DDAH1;WWC3;TNFRSF8;UTP20;CDC6;PPM1D;ETS1;NME1
Positive Regulation of Protein Localization to Nucleus (GO:1900182)	4/67	0.0514509	0.500529	0	0	3.002815214135969	8.909734275396266	CCT2;TFRC;TCP1;IPO5
Regulation of Lysosomal Lumen pH (GO:0035751)	2/18	0.0534835	0.500529	0	0	5.889513108614232	17.24674738765684	ATP6V0B;CLN6
Positive Regulation of Chromosome Segregation (GO:0051984)	2/18	0.0534835	0.500529	0	0	5.889513108614232	17.24674738765684	CDC6;NCAPD3
tRNA Aminoacylation for Protein Translation (GO:0006418)	2/18	0.0534835	0.500529	0	0	5.889513108614232	17.24674738765684	MARS2;FARSB
Hematopoietic Progenitor Cell Differentiation (GO:0002244)	2/18	0.0534835	0.500529	0	0	5.889513108614232	17.24674738765684	LYN;ARMC6
Maturation of LSU-rRNA (GO:0000470)	2/18	0.0534835	0.500529	0	0	5.889513108614232	17.24674738765684	DDX18;PAK1IP1
Response to Light Stimulus (GO:0009416)	3/41	0.05383	0.500529	0	0	3.727146814404432	10.890441665884602	COPS3;DTL;MAP4K3
Myeloid Cell Differentiation (GO:0030099)	3/41	0.05383	0.500529	0	0	3.727146814404432	10.890441665884602	PRDX3;HSPA9;LYN
Alpha-Amino Acid Metabolic Process (GO:1901605)	2/19	0.0589714	0.500529	0	0	5.542630535360211	15.689535109448267	DDAH1;MTHFD1
Transcription by RNA Polymerase II (GO:0006366)	7/166	0.0598289	0.500529	0	0	2.0898506889433004	5.885577154076748	TFDP1;ICE1;NCBP1;POLR2B;XRN2;ETS1;ATF4
C-X-C Chemokine Receptor CXCR4 Signaling Pathway (GO:0038159)	1/3	0.0614303	0.500529	0	0	23.496268656716417	65.55112153455234	LYN
Regulation of Male Gonad Development (GO:2000018)	1/3	0.0614303	0.500529	0	0	23.496268656716417	65.55112153455234	DHX37
Alpha-Amino Acid Biosynthetic Process (GO:1901607)	1/3	0.0614303	0.500529	0	0	23.496268656716417	65.55112153455234	MTHFD1
Negative Regulation of Toll-Like Receptor 2 Signaling Pathway (GO:0034136)	1/3	0.0614303	0.500529	0	0	23.496268656716417	65.55112153455234	LYN
Norepinephrine Transport (GO:0015874)	1/3	0.0614303	0.500529	0	0	23.496268656716417	65.55112153455234	SLC22A3
Catecholamine Uptake (GO:0090493)	1/3	0.0614303	0.500529	0	0	23.496268656716417	65.55112153455234	SLC22A3
Cellular Response to Histamine (GO:0071420)	1/3	0.0614303	0.500529	0	0	23.496268656716417	65.55112153455234	DIAPH1
Polyamine Transport (GO:0015846)	1/3	0.0614303	0.500529	0	0	23.496268656716417	65.55112153455234	SLC22A3
Centriole Assembly (GO:0098534)	1/3	0.0614303	0.500529	0	0	23.496268656716417	65.55112153455234	E2F4
Citrulline Metabolic Process (GO:0000052)	1/3	0.0614303	0.500529	0	0	23.496268656716417	65.55112153455234	DDAH1
Positive Regulation of Interleukin-18 Production (GO:0032741)	1/3	0.0614303	0.500529	0	0	23.496268656716417	65.55112153455234	DHX9
Interleukin-5-Mediated Signaling Pathway (GO:0038043)	1/3	0.0614303	0.500529	0	0	23.496268656716417	65.55112153455234	LYN
Regulation of NK T Cell Activation (GO:0051133)	1/3	0.0614303	0.500529	0	0	23.496268656716417	65.55112153455234	HSPH1
Proteasomal Protein Catabolic Process (GO:0010498)	11/310	0.061448	0.500529	0	0	1.7534805942288247	4.8914461423032405	KCMF1;PSMA3;BRSK2;PSMA2;PSME4;GID8;PSMC2;ARIH2;UBE2N;UFD1;DTL
DNA-templated Transcription (GO:0006351)	7/169	0.064582	0.500529	0	0	2.050654980680426	5.618423789289287	TFDP1;POLR2B;GTF3A;POLR3G;POLRMT;ETS1;ATF4
Negative Regulation of Protein Depolymerization (GO:1901880)	2/20	0.0646439	0.500529	0	0	5.234290470245527	14.335997034876945	NAV3;KATNB1
Positive Regulation of DNA Replication (GO:0045740)	2/20	0.0646439	0.500529	0	0	5.234290470245527	14.335997034876945	PCNA;DHX9
Hippo Signaling (GO:0035329)	2/20	0.0646439	0.500529	0	0	5.234290470245527	14.335997034876945	TEAD4;WWC3
Positive Regulation of Telomere Maintenance via Telomerase (GO:0032212)	2/20	0.0646439	0.500529	0	0	5.234290470245527	14.335997034876945	CCT2;TCP1
Mitochondrial Cytochrome C Oxidase Assembly (GO:0033617)	2/20	0.0646439	0.500529	0	0	5.234290470245527	14.335997034876945	COA3;SCO1
Cholesterol Metabolic Process (GO:0008203)	3/45	0.0674908	0.500529	0	0	3.3711063372717507	9.08770631463423	DHCR24;LBR;CLN6
Regulation of Insulin Secretion Involved in Cellular Response to Glucose Stimulus (GO:0061178)	2/21	0.0704908	0.500529	0	0	4.9584072540902815	13.15105097038517	BRSK2;STXBP4
Aminoglycan Biosynthetic Process (GO:0006023)	2/21	0.0704908	0.500529	0	0	4.9584072540902815	13.15105097038517	DDX18;HS3ST2
Regulation of Plasma Membrane Bounded Cell Projection Organization (GO:0120035)	2/21	0.0704908	0.500529	0	0	4.9584072540902815	13.15105097038517	BRSK2;KIF26A
Secondary Alcohol Biosynthetic Process (GO:1902653)	2/21	0.0704908	0.500529	0	0	4.9584072540902815	13.15105097038517	DHCR24;LBR
Regulation of mRNA Catabolic Process (GO:0061013)	3/46	0.0711299	0.500529	0	0	3.2924462318587167	8.702748363887943	YTHDF1;PNPT1;VIM
RNA 3'-End Processing (GO:0031123)	3/47	0.0748555	0.500529	0	0	3.2173615857826383	8.340029283634275	SUPV3L1;PNPT1;NCBP1
Negative Regulation of Response to Stimulus (GO:0048585)	3/47	0.0748555	0.500529	0	0	3.2173615857826383	8.340029283634275	LYN;DDAH1;KIF26A
Nucleocytoplasmic Transport (GO:0006913)	3/47	0.0748555	0.500529	0	0	3.2173615857826383	8.340029283634275	LSG1;NUP205;NUP160
Negative Regulation of Programmed Cell Death (GO:0043069)	10/284	0.0753173	0.500529	0	0	1.736324437054364	4.490214384828982	PRDX3;HSPA9;SUPV3L1;PRELID1;TFRC;SLTM;DPP9;ARHGDIA;BAG1;NAA15
Regulation of Mitochondrial Translation (GO:0070129)	2/22	0.0765024	0.500529	0	0	4.710112359550561	12.107029034058503	COA3;C1QBP
Regulatory ncRNA-mediated Post-Transcriptional Gene Silencing (GO:0035194)	2/22	0.0765024	0.500529	0	0	4.710112359550561	12.107029034058503	NCBP1;DHX9
Chaperone Cofactor-Dependent Protein Refolding (GO:0051085)	2/22	0.0765024	0.500529	0	0	4.710112359550561	12.107029034058503	HSPA9;HSPA8
Cholesterol Biosynthetic Process (GO:0006695)	2/22	0.0765024	0.500529	0	0	4.710112359550561	12.107029034058503	DHCR24;LBR
Vacuolar Acidification (GO:0007035)	2/22	0.0765024	0.500529	0	0	4.710112359550561	12.107029034058503	ATP6V0B;CLN6
Glycosaminoglycan Biosynthetic Process (GO:0006024)	2/22	0.0765024	0.500529	0	0	4.710112359550561	12.107029034058503	DDX18;HS3ST2
Protein Export From Nucleus (GO:0006611)	2/22	0.0765024	0.500529	0	0	4.710112359550561	12.107029034058503	XPO6;NUTF2
Regulation of Chromosome Segregation (GO:0051983)	2/22	0.0765024	0.500529	0	0	4.710112359550561	12.107029034058503	CDC6;NCAPD3
Regulation of Dendritic Cell Apoptotic Process (GO:2000668)	1/4	0.0810598	0.500529	0	0	15.662935323383085	39.354193814407296	LYN
Regulation of Fat Cell Proliferation (GO:0070344)	1/4	0.0810598	0.500529	0	0	15.662935323383085	39.354193814407296	TFDP1
Negative Regulation of Leukocyte Proliferation (GO:0070664)	1/4	0.0810598	0.500529	0	0	15.662935323383085	39.354193814407296	LYN
Regulation of Interleukin-18 Production (GO:0032661)	1/4	0.0810598	0.500529	0	0	15.662935323383085	39.354193814407296	DHX9
Regulation of Mast Cell Activation (GO:0033003)	1/4	0.0810598	0.500529	0	0	15.662935323383085	39.354193814407296	LYN
Arginine Catabolic Process (GO:0006527)	1/4	0.0810598	0.500529	0	0	15.662935323383085	39.354193814407296	DDAH1
Regulation of Phospholipid Transport (GO:2001138)	1/4	0.0810598	0.500529	0	0	15.662935323383085	39.354193814407296	PRELID1
Neurotransmitter Reuptake (GO:0098810)	1/4	0.0810598	0.500529	0	0	15.662935323383085	39.354193814407296	SLC22A3
Catecholamine Transport (GO:0051937)	1/4	0.0810598	0.500529	0	0	15.662935323383085	39.354193814407296	SLC22A3
Dendrite Extension (GO:0097484)	1/4	0.0810598	0.500529	0	0	15.662935323383085	39.354193814407296	LLPH
Serotonin Uptake (GO:0051610)	1/4	0.0810598	0.500529	0	0	15.662935323383085	39.354193814407296	SLC22A3
Dopamine Uptake (GO:0090494)	1/4	0.0810598	0.500529	0	0	15.662935323383085	39.354193814407296	SLC22A3
Positive Regulation of Endopeptidase Activity (GO:0010950)	1/4	0.0810598	0.500529	0	0	15.662935323383085	39.354193814407296	PRELID1
Enteric Nervous System Development (GO:0048484)	1/4	0.0810598	0.500529	0	0	15.662935323383085	39.354193814407296	KIF26A
Positive Regulation of Keratinocyte Proliferation (GO:0010838)	1/4	0.0810598	0.500529	0	0	15.662935323383085	39.354193814407296	STXBP4
Positive Regulation of Lymphocyte Apoptotic Process (GO:0070230)	1/4	0.0810598	0.500529	0	0	15.662935323383085	39.354193814407296	PRELID1
Glycine Transport (GO:0015816)	1/4	0.0810598	0.500529	0	0	15.662935323383085	39.354193814407296	SLC38A5
Histamine Metabolic Process (GO:0001692)	1/4	0.0810598	0.500529	0	0	15.662935323383085	39.354193814407296	SLC22A3
Hyaluronan Biosynthetic Process (GO:0030213)	1/4	0.0810598	0.500529	0	0	15.662935323383085	39.354193814407296	DDX18
Positive Regulation of Skeletal Muscle Cell Differentiation (GO:2001016)	1/4	0.0810598	0.500529	0	0	15.662935323383085	39.354193814407296	MCUB
Intracellular Distribution of Mitochondria (GO:0048312)	1/4	0.0810598	0.500529	0	0	15.662935323383085	39.354193814407296	CLUH
Protein Oxidation (GO:0018158)	1/4	0.0810598	0.500529	0	0	15.662935323383085	39.354193814407296	PRDX3
Protein Targeting to Vacuole Involved in Autophagy (GO:0071211)	1/4	0.0810598	0.500529	0	0	15.662935323383085	39.354193814407296	HSPA8
Purine Ribonucleoside Monophosphate Catabolic Process (GO:0009169)	1/4	0.0810598	0.500529	0	0	15.662935323383085	39.354193814407296	PRTFDC1
Pyrimidine-Containing Compound Biosynthetic Process (GO:0072528)	1/4	0.0810598	0.500529	0	0	15.662935323383085	39.354193814407296	CTPS1
Quaternary Ammonium Group Transport (GO:0015697)	1/4	0.0810598	0.500529	0	0	15.662935323383085	39.354193814407296	SLC22A3
Regulation of MHC Class I Biosynthetic Process (GO:0045343)	1/4	0.0810598	0.500529	0	0	15.662935323383085	39.354193814407296	HSPH1
Regulation of Antigen Receptor-Mediated Signaling Pathway (GO:0050854)	1/4	0.0810598	0.500529	0	0	15.662935323383085	39.354193814407296	LYN
Regulation of Axon Guidance (GO:1902667)	1/4	0.0810598	0.500529	0	0	15.662935323383085	39.354193814407296	YTHDF1
Regulation of Apoptotic Process (GO:0042981)	16/523	0.0826107	0.500529	0	0	1.5079324243203842	3.760203989137927	HSPA9;PRELID1;TFRC;DDX20;ETS1;NME1;PRDX3;SUPV3L1;C1QBP;ARHGDIA;BAG1;TNFRSF8;NAA15;IFT57;ATF4;SLC27A4
RNA Splicing, via Transesterification Reactions (GO:0000375)	2/23	0.0826694	0.500529	0	0	4.485464597824149	11.181843193613021	SF3B3;TXNL4A
Regulation of Microtubule Depolymerization (GO:0031114)	2/23	0.0826694	0.500529	0	0	4.485464597824149	11.181843193613021	NAV3;KATNB1
Respiratory Chain Complex IV Assembly (GO:0008535)	2/23	0.0826694	0.500529	0	0	4.485464597824149	11.181843193613021	COA3;SCO1
Positive Regulation of Substrate Adhesion-Dependent Cell Spreading (GO:1900026)	2/23	0.0826694	0.500529	0	0	4.485464597824149	11.181843193613021	C1QBP;CRK
Positive Regulation of Telomere Maintenance via Telomere Lengthening (GO:1904358)	2/23	0.0826694	0.500529	0	0	4.485464597824149	11.181843193613021	CCT2;TCP1
Regulation of DNA Damage Response, Signal Transduction by P53 Class Mediator (GO:0043516)	2/23	0.0826694	0.500529	0	0	4.485464597824149	11.181843193613021	COPS3;YJU2
Mitochondrial Respiratory Chain Complex Assembly (GO:0033108)	4/80	0.0864796	0.500529	0	0	2.4865938430983117	6.086800062088015	COA3;SCO1;NDUFAF4;NDUFS3
Cilium Assembly (GO:0060271)	7/182	0.0877592	0.500529	0	0	1.8963358778625954	4.614085584380578	ACTR3;C2CD3;ARL6;TMEM237;RAB34;E2F4;IFT57
DNA Synthesis Involved in DNA Repair (GO:0000731)	2/24	0.0889826	0.500529	0	0	4.281239359891045	10.357665520797799	PCNA;DTL
Nuclear-Transcribed mRNA Catabolic Process, Nonsense-Mediated Decay (GO:0000184)	2/24	0.0889826	0.500529	0	0	4.281239359891045	10.357665520797799	NCBP1;PNRC2
Sterol Biosynthetic Process (GO:0016126)	2/24	0.0889826	0.500529	0	0	4.281239359891045	10.357665520797799	DHCR24;LBR
Regulation of Alternative mRNA Splicing, via Spliceosome (GO:0000381)	3/51	0.0905892	0.500529	0	0	2.9483082706766917	7.080125675655537	PTBP1;PUF60;RBPMS2
Nuclear-Transcribed mRNA Catabolic Process (GO:0000956)	4/82	0.0926864	0.500529	0	0	2.422447992259313	5.761873653526108	NCBP1;EXOSC9;XRN2;PNRC2
Positive Regulation of Binding (GO:0051099)	3/52	0.0947218	0.500529	0	0	2.8879085468773975	6.80625389847335	NCBP1;SLTM;NME1
Response to Steroid Hormone (GO:0048545)	2/25	0.0954333	0.500529	0	0	4.094772838299951	9.619963051236903	HSPA8;NR3C1
Intrinsic Apoptotic Signaling Pathway in Response to Endoplasmic Reticulum Stress (GO:0070059)	2/25	0.0954333	0.500529	0	0	4.094772838299951	9.619963051236903	BRSK2;ATF4
Regulation of NLRP3 Inflammasome Complex Assembly (GO:1900225)	2/25	0.0954333	0.500529	0	0	4.094772838299951	9.619963051236903	HSPA8;DHX33
7-Methylguanosine RNA Capping (GO:0009452)	1/5	0.10028	0.500529	0	0	11.746268656716419	27.013908724031285	NCBP1
7-Methylguanosine mRNA Capping (GO:0006370)	1/5	0.10028	0.500529	0	0	11.746268656716419	27.013908724031285	NCBP1
B Cell Homeostasis (GO:0001782)	1/5	0.10028	0.500529	0	0	11.746268656716419	27.013908724031285	LYN
Negative Regulation of Erythrocyte Differentiation (GO:0045647)	1/5	0.10028	0.500529	0	0	11.746268656716419	27.013908724031285	HSPA9
Regulation of Establishment of Protein Localization to Telomere (GO:0070203)	1/5	0.10028	0.500529	0	0	11.746268656716419	27.013908724031285	TCP1
Negative Regulation of Hydrogen Peroxide-Mediated Programmed Cell Death (GO:1901299)	1/5	0.10028	0.500529	0	0	11.746268656716419	27.013908724031285	SLTM
L-alanine Transport (GO:0015808)	1/5	0.10028	0.500529	0	0	11.746268656716419	27.013908724031285	SLC38A5
L-methionine Salvage (GO:0071267)	1/5	0.10028	0.500529	0	0	11.746268656716419	27.013908724031285	ENOPH1
Negative Regulation of Mitochondrial Membrane Potential (GO:0010917)	1/5	0.10028	0.500529	0	0	11.746268656716419	27.013908724031285	PRELID1
Regulation of Leukocyte Degranulation (GO:0043300)	1/5	0.10028	0.500529	0	0	11.746268656716419	27.013908724031285	LYN
Regulation of miRNA Catabolic Process (GO:2000625)	1/5	0.10028	0.500529	0	0	11.746268656716419	27.013908724031285	PNPT1
Cap-Dependent Translational Initiation (GO:0002191)	1/5	0.10028	0.500529	0	0	11.746268656716419	27.013908724031285	NCBP1
Cellular Response to Platelet-Derived Growth Factor Stimulus (GO:0036120)	1/5	0.10028	0.500529	0	0	11.746268656716419	27.013908724031285	DDX18
Response to Histamine (GO:0034776)	1/5	0.10028	0.500529	0	0	11.746268656716419	27.013908724031285	DIAPH1
Columnar/Cuboidal Epithelial Cell Differentiation (GO:0002065)	1/5	0.10028	0.500529	0	0	11.746268656716419	27.013908724031285	E2F4
Ribosome-Associated Ubiquitin-Dependent Protein Catabolic Process (GO:1990116)	1/5	0.10028	0.500529	0	0	11.746268656716419	27.013908724031285	ZNF598
Serotonin Transport (GO:0006837)	1/5	0.10028	0.500529	0	0	11.746268656716419	27.013908724031285	SLC22A3
Embryonic Digestive Tract Morphogenesis (GO:0048557)	1/5	0.10028	0.500529	0	0	11.746268656716419	27.013908724031285	RBPMS2
Sulfur Amino Acid Biosynthetic Process (GO:0000097)	1/5	0.10028	0.500529	0	0	11.746268656716419	27.013908724031285	MTHFD1
tRNA Pseudouridine Synthesis (GO:0031119)	1/5	0.10028	0.500529	0	0	11.746268656716419	27.013908724031285	PUSL1
Positive Regulation of Leukocyte Apoptotic Process (GO:2000108)	1/5	0.10028	0.500529	0	0	11.746268656716419	27.013908724031285	LYN
Transcription Elongation-Coupled Chromatin Remodeling (GO:0140673)	1/5	0.10028	0.500529	0	0	11.746268656716419	27.013908724031285	USP15
Fatty Acid Alpha-Oxidation (GO:0001561)	1/5	0.10028	0.500529	0	0	11.746268656716419	27.013908724031285	SLC25A17
Glycerol Ether Biosynthetic Process (GO:0046504)	1/5	0.10028	0.500529	0	0	11.746268656716419	27.013908724031285	SELENOI
Positive Regulation of Protein K63-linked Ubiquitination (GO:1902523)	1/5	0.10028	0.500529	0	0	11.746268656716419	27.013908724031285	UBE2N
Positive Regulation of Protein Localization to Chromosome, Telomeric Region (GO:1904816)	1/5	0.10028	0.500529	0	0	11.746268656716419	27.013908724031285	TCP1
Lens Fiber Cell Development (GO:0070307)	1/5	0.10028	0.500529	0	0	11.746268656716419	27.013908724031285	ATF4
Lipid Glycosylation (GO:0030259)	1/5	0.10028	0.500529	0	0	11.746268656716419	27.013908724031285	B3GALT1
Protein Histidyl Modification to Diphthamide (GO:0017183)	1/5	0.10028	0.500529	0	0	11.746268656716419	27.013908724031285	DPH2
Monoamine Transport (GO:0015844)	1/5	0.10028	0.500529	0	0	11.746268656716419	27.013908724031285	SLC22A3
Regulation of MDA-5 Signaling Pathway (GO:0039533)	1/5	0.10028	0.500529	0	0	11.746268656716419	27.013908724031285	C1QBP
Multi-Ciliated Epithelial Cell Differentiation (GO:1903251)	1/5	0.10028	0.500529	0	0	11.746268656716419	27.013908724031285	E2F4
Regulation of Calcium Import Into the Mitochondrion (GO:0110097)	1/5	0.10028	0.500529	0	0	11.746268656716419	27.013908724031285	MCUB
Regulation of Cellular Response to Hypoxia (GO:1900037)	1/5	0.10028	0.500529	0	0	11.746268656716419	27.013908724031285	DDAH1
Tube Closure (GO:0060606)	2/26	0.102013	0.500529	0	0	3.923845193508115	8.956781433172763	MTHFD1L;MTHFD1
Primary Neural Tube Formation (GO:0014020)	2/26	0.102013	0.500529	0	0	3.923845193508115	8.956781433172763	MTHFD1L;MTHFD1
Protein Insertion Into ER Membrane (GO:0045048)	2/26	0.102013	0.500529	0	0	3.923845193508115	8.956781433172763	SEC61A1;EMC8
miRNA-mediated Post-Transcriptional Gene Silencing (GO:0035195)	2/26	0.102013	0.500529	0	0	3.923845193508115	8.956781433172763	NCBP1;DHX9
Mitochondrial Membrane Organization (GO:0007006)	2/26	0.102013	0.500529	0	0	3.923845193508115	8.956781433172763	HSPA9;LETM1
Negative Regulation of Cellular Process (GO:0048523)	12/380	0.102506	0.500529	0	0	1.5515141262053798	3.534092426701	LYN;DDAH1;DPP9;WWC3;TNFRSF8;UTP20;CDC6;PPM1D;ETS1;CRK;NME1;IPO5
Response to Tumor Necrosis Factor (GO:0034612)	3/55	0.107569	0.500529	0	0	2.720647773279352	6.066026226966135	SMPD4;CHUK;MAP4K3
Mitotic DNA Damage Checkpoint Signaling (GO:0044773)	3/55	0.107569	0.500529	0	0	2.720647773279352	6.066026226966135	TIPIN;POLR1B;DTL
Negative Regulation of Microtubule Polymerization or Depolymerization (GO:0031111)	2/27	0.108714	0.500529	0	0	3.7665917602996255	8.358206040755087	NAV3;KATNB1
Neural Tube Closure (GO:0001843)	2/27	0.108714	0.500529	0	0	3.7665917602996255	8.358206040755087	MTHFD1L;MTHFD1
Regulatory ncRNA-mediated Gene Silencing (GO:0031047)	2/27	0.108714	0.500529	0	0	3.7665917602996255	8.358206040755087	NCBP1;DHX9
Positive Regulation of Interferon-Beta Production (GO:0032728)	2/27	0.108714	0.500529	0	0	3.7665917602996255	8.358206040755087	DHX9;POLR3G
Protein Targeting (GO:0006605)	5/121	0.109792	0.500529	0	0	2.0376175548589344	4.501440973942392	SEC61A1;ARL6;KATNB1;TIMM44;GDAP1
Modification-Dependent Protein Catabolic Process (GO:0019941)	7/193	0.110611	0.500529	0	0	1.7826069112698022	3.924824506221197	KCMF1;COPS3;HECW1;PSMC2;ARIH2;UFD1;DTL
Positive Regulation of Cell Cycle Process (GO:0090068)	4/88	0.112522	0.500529	0	0	2.2483378256963165	4.911740689225028	RANBP1;FEN1;CDC6;NCAPD3
Non-Motile Cilium Assembly (GO:1905515)	2/28	0.115527	0.500529	0	0	3.6214347450302506	7.815951582491202	C2CD3;IFT57
Positive Regulation of RNA Splicing (GO:0033120)	2/28	0.115527	0.500529	0	0	3.6214347450302506	7.815951582491202	NCBP1;U2AF2
Positive Regulation of Response to Biotic Stimulus (GO:0002833)	2/28	0.115527	0.500529	0	0	3.6214347450302506	7.815951582491202	DHX9;POLR3G
7-Methylguanosine Cap Hypermethylation (GO:0036261)	1/6	0.1191	0.500529	0	0	9.396268656716417	19.993288665166396	SNRPB
B Cell Proliferation (GO:0042100)	1/6	0.1191	0.500529	0	0	9.396268656716417	19.993288665166396	CTPS1
HRI-mediated Signaling (GO:0140468)	1/6	0.1191	0.500529	0	0	9.396268656716417	19.993288665166396	ATF4
Negative Regulation of Mitochondrial Fusion (GO:0010637)	1/6	0.1191	0.500529	0	0	9.396268656716417	19.993288665166396	TFRC
RNA Capping (GO:0036260)	1/6	0.1191	0.500529	0	0	9.396268656716417	19.993288665166396	SNRPB
T Cell Apoptotic Process (GO:0070231)	1/6	0.1191	0.500529	0	0	9.396268656716417	19.993288665166396	SIVA1
TRAMP-dependent tRNA Surveillance Pathway (GO:0071038)	1/6	0.1191	0.500529	0	0	9.396268656716417	19.993288665166396	EXOSC9
Regulation of Myeloid Leukocyte Mediated Immunity (GO:0002886)	1/6	0.1191	0.500529	0	0	9.396268656716417	19.993288665166396	LYN
Regulation of Organ Growth (GO:0046620)	1/6	0.1191	0.500529	0	0	9.396268656716417	19.993288665166396	WWC3
Aspartate Family Amino Acid Biosynthetic Process (GO:0009067)	1/6	0.1191	0.500529	0	0	9.396268656716417	19.993288665166396	MTHFD1
Axon Ensheathment in Central Nervous System (GO:0032291)	1/6	0.1191	0.500529	0	0	9.396268656716417	19.993288665166396	GPM6B
Nuclear Polyadenylation-Dependent rRNA Catabolic Process (GO:0071035)	1/6	0.1191	0.500529	0	0	9.396268656716417	19.993288665166396	EXOSC9
Nuclear-Transcribed mRNA Catabolic Process, Deadenylation-Independent Decay (GO:0031086)	1/6	0.1191	0.500529	0	0	9.396268656716417	19.993288665166396	PNRC2
Peptidyl-Histidine Modification (GO:0018202)	1/6	0.1191	0.500529	0	0	9.396268656716417	19.993288665166396	DPH2
Cellular Response to Muramyl Dipeptide (GO:0071225)	1/6	0.1191	0.500529	0	0	9.396268656716417	19.993288665166396	VIM
Chaperone Mediated Protein Folding Independent of Cofactor (GO:0051086)	1/6	0.1191	0.500529	0	0	9.396268656716417	19.993288665166396	TCP1
Positive Regulation of T Cell Apoptotic Process (GO:0070234)	1/6	0.1191	0.500529	0	0	9.396268656716417	19.993288665166396	PRELID1
Response to Platelet-Derived Growth Factor (GO:0036119)	1/6	0.1191	0.500529	0	0	9.396268656716417	19.993288665166396	DDX18
Ribosomal Small Subunit Export From Nucleus (GO:0000056)	1/6	0.1191	0.500529	0	0	9.396268656716417	19.993288665166396	NOP9
Serine Transport (GO:0032329)	1/6	0.1191	0.500529	0	0	9.396268656716417	19.993288665166396	SLC38A5
Somite Development (GO:0061053)	1/6	0.1191	0.500529	0	0	9.396268656716417	19.993288665166396	MTHFD1
Sperm DNA Condensation (GO:0035092)	1/6	0.1191	0.500529	0	0	9.396268656716417	19.993288665166396	PSME4
Termination of RNA Polymerase II Transcription (GO:0006369)	1/6	0.1191	0.500529	0	0	9.396268656716417	19.993288665166396	XRN2
Exonucleolytic Trimming to Gen Mat 3'-End of 5.8S rRNA Frm Tricistronic rRNA Trnscpt (GO:0000467)	1/6	0.1191	0.500529	0	0	9.396268656716417	19.993288665166396	EXOSC9
Tubulin Complex Assembly (GO:0007021)	1/6	0.1191	0.500529	0	0	9.396268656716417	19.993288665166396	TCP1
Hematopoietic Stem Cell Proliferation (GO:0071425)	1/6	0.1191	0.500529	0	0	9.396268656716417	19.993288665166396	ARIH2
Positive Regulation of Trophoblast Cell Migration (GO:1901165)	1/6	0.1191	0.500529	0	0	9.396268656716417	19.993288665166396	C1QBP
Post-Translational Protein Targeting to Membrane, Translocation (GO:0031204)	1/6	0.1191	0.500529	0	0	9.396268656716417	19.993288665166396	SEC61A1
Macropinocytosis (GO:0044351)	1/6	0.1191	0.500529	0	0	9.396268656716417	19.993288665166396	RAB34
rRNA Base Methylation (GO:0070475)	1/6	0.1191	0.500529	0	0	9.396268656716417	19.993288665166396	EMG1
Negative Regulation of RIG-I Signaling Pathway (GO:0039536)	1/6	0.1191	0.500529	0	0	9.396268656716417	19.993288665166396	UFD1
Mitochondrial Translation (GO:0032543)	4/90	0.11952	0.500529	0	0	2.195699868363317	4.664261553746256	MRPL3;MRPS15;MRPL32;MRPL11
Positive Regulation of Response to Stimulus (GO:0048584)	3/58	0.12105	0.500529	0	0	2.571633629528366	5.430138315783983	PCNA;DHX9;UBE2N
Regulation of Mitochondrial Membrane Potential (GO:0051881)	2/29	0.122446	0.500529	0	0	3.487030101262311	7.323046032481839	PRDX3;PRELID1
Nucleobase-Containing Compound Metabolic Process (GO:0006139)	2/29	0.122446	0.500529	0	0	3.487030101262311	7.323046032481839	DUT;CTPS1
Positive Regulation of G1/S Transition of Mitotic Cell Cycle (GO:1900087)	2/29	0.122446	0.500529	0	0	3.487030101262311	7.323046032481839	TFDP1;CDC6
Positive Regulation of Bone Mineralization (GO:0030501)	2/29	0.122446	0.500529	0	0	3.487030101262311	7.323046032481839	SLC20A2;GPM6B
Negative Regulation of G Protein-Coupled Receptor Signaling Pathway (GO:0045744)	2/29	0.122446	0.500529	0	0	3.487030101262311	7.323046032481839	SLTM;YWHAB
mRNA Metabolic Process (GO:0016071)	4/91	0.123088	0.500529	0	0	2.170288440685318	4.546432758141671	PNPT1;NCBP1;U2AF2;EXOSC9
Positive Regulation of Mitotic Cell Cycle Phase Transition (GO:1901992)	3/59	0.125676	0.500529	0	0	2.5255102040816326	5.2380335236813735	TFDP1;ESPL1;DTL
Negative Regulation of Cytoplasmic Pattern Recognition Receptor Signaling Pathway (GO:0039532)	2/30	0.129464	0.500529	0	0	3.3622257891920815	6.87358468544293	C1QBP;UFD1
Positive Regulation of Biomineral Tissue Development (GO:0070169)	2/30	0.129464	0.500529	0	0	3.3622257891920815	6.87358468544293	SLC20A2;GPM6B
Negative Regulation of Supramolecular Fiber Organization (GO:1902904)	3/60	0.130365	0.500529	0	0	2.4810051444400476	5.054851220445992	HSPA8;NAV3;KATNB1
Proteasome-Mediated Ubiquitin-Dependent Protein Catabolic Process (GO:0043161)	9/280	0.133545	0.500529	0	0	1.5742974737439681	3.1695625237425955	KCMF1;PSMA3;PSMA2;GID8;PSMC2;ARIH2;UBE2N;ZNF598;DTL
Cellular Response to Lipid (GO:0071396)	5/129	0.13364	0.500529	0	0	1.9049364613880744	3.8338814931813685	LYN;HSPA8;MGST1;VIM;NR3C1
Regulation of RNA Splicing (GO:0043484)	4/94	0.134061	0.500529	0	0	2.0974423480083857	4.214725266724732	PTBP1;SF3B3;U2AF2;HNRNPF
Protein Polyubiquitination (GO:0000209)	7/204	0.136315	0.500529	0	0	1.6815786414538691	3.3510325993928842	KCMF1;WSB2;ARIH2;UBE2N;TPP2;ZNF598;DTL
Positive Regulation of Innate Immune Response (GO:0045089)	2/31	0.136572	0.500529	0	0	3.2460286710577297	6.462536935965398	DHX9;POLR3G
Positive Regulation of Ossification (GO:0045778)	2/31	0.136572	0.500529	0	0	3.2460286710577297	6.462536935965398	SLC20A2;GPM6B
Negative Regulation of Chromosome Organization (GO:2001251)	1/7	0.137528	0.500529	0	0	7.829601990049751	15.533371508050202	ESPL1
GMP Metabolic Process (GO:0046037)	1/7	0.137528	0.500529	0	0	7.829601990049751	15.533371508050202	PRTFDC1
Golgi Lumen Acidification (GO:0061795)	1/7	0.137528	0.500529	0	0	7.829601990049751	15.533371508050202	ATP6V0B
Negative Regulation of Membrane Potential (GO:0045837)	1/7	0.137528	0.500529	0	0	7.829601990049751	15.533371508050202	PRELID1
- Reg of Oxidative Stress-Induced Neuron Intrinsic Apoptotic Sgnlng Pway (GO:1903377)	1/7	0.137528	0.500529	0	0	7.829601990049751	15.533371508050202	ATF4
T Cell Proliferation (GO:0042098)	1/7	0.137528	0.500529	0	0	7.829601990049751	15.533371508050202	CTPS1
Regulation of Lymphocyte Differentiation (GO:0045619)	1/7	0.137528	0.500529	0	0	7.829601990049751	15.533371508050202	PRELID1
U4 snRNA 3'-End Processing (GO:0034475)	1/7	0.137528	0.500529	0	0	7.829601990049751	15.533371508050202	EXOSC9
Regulation of Mast Cell Degranulation (GO:0043304)	1/7	0.137528	0.500529	0	0	7.829601990049751	15.533371508050202	LYN
Actin-Myosin Filament Sliding (GO:0033275)	1/7	0.137528	0.500529	0	0	7.829601990049751	15.533371508050202	MYH2
Regulation of Mitotic Centrosome Separation (GO:0046602)	1/7	0.137528	0.500529	0	0	7.829601990049751	15.533371508050202	RANBP1
Negative Regulation of Smooth Muscle Cell Apoptotic Process (GO:0034392)	1/7	0.137528	0.500529	0	0	7.829601990049751	15.533371508050202	DNMT1
Regulation of Mononuclear Cell Migration (GO:0071675)	1/7	0.137528	0.500529	0	0	7.829601990049751	15.533371508050202	LYN
Regulation of Nuclear Cell Cycle DNA Replication (GO:0033262)	1/7	0.137528	0.500529	0	0	7.829601990049751	15.533371508050202	TIPIN
Aromatic Amino Acid Transport (GO:0015801)	1/7	0.137528	0.500529	0	0	7.829601990049751	15.533371508050202	SLC38A5
Nucleoside Triphosphate Metabolic Process (GO:0009141)	1/7	0.137528	0.500529	0	0	7.829601990049751	15.533371508050202	DCTPP1
Regulation of Response to Wounding (GO:1903034)	1/7	0.137528	0.500529	0	0	7.829601990049751	15.533371508050202	CRK
Regulation of Toll-Like Receptor 2 Signaling Pathway (GO:0034135)	1/7	0.137528	0.500529	0	0	7.829601990049751	15.533371508050202	LYN
Phosphate Ion Transmembrane Transport (GO:0035435)	1/7	0.137528	0.500529	0	0	7.829601990049751	15.533371508050202	SLC20A2
Phosphatidylethanolamine Biosynthetic Process (GO:0006646)	1/7	0.137528	0.500529	0	0	7.829601990049751	15.533371508050202	SELENOI
Polysaccharide Metabolic Process (GO:0005976)	1/7	0.137528	0.500529	0	0	7.829601990049751	15.533371508050202	DDX18
Positive Regulation of RIG-I Signaling Pathway (GO:1900246)	1/7	0.137528	0.500529	0	0	7.829601990049751	15.533371508050202	USP15
Serine Family Amino Acid Biosynthetic Process (GO:0009070)	1/7	0.137528	0.500529	0	0	7.829601990049751	15.533371508050202	MTHFD1
Serine Family Amino Acid Metabolic Process (GO:0009069)	1/7	0.137528	0.500529	0	0	7.829601990049751	15.533371508050202	MTHFD1
Depyrimidination (GO:0045008)	1/7	0.137528	0.500529	0	0	7.829601990049751	15.533371508050202	UNG
Positive Regulation of Chromosome Condensation (GO:1905821)	1/7	0.137528	0.500529	0	0	7.829601990049751	15.533371508050202	NCAPD3
Dolichol Metabolic Process (GO:0019348)	1/7	0.137528	0.500529	0	0	7.829601990049751	15.533371508050202	NUS1
Dopamine Transport (GO:0015872)	1/7	0.137528	0.500529	0	0	7.829601990049751	15.533371508050202	SLC22A3
Somatic Hypermutation of Immunoglobulin Genes (GO:0016446)	1/7	0.137528	0.500529	0	0	7.829601990049751	15.533371508050202	MLH1
Steroid Hormone Receptor Signaling Pathway (GO:0043401)	1/7	0.137528	0.500529	0	0	7.829601990049751	15.533371508050202	NR3C1
Synaptic Signaling (GO:0099536)	1/7	0.137528	0.500529	0	0	7.829601990049751	15.533371508050202	KCMF1
tRNA Surveillance (GO:0106354)	1/7	0.137528	0.500529	0	0	7.829601990049751	15.533371508050202	EXOSC9
Establishment of Planar Polarity (GO:0001736)	1/7	0.137528	0.500529	0	0	7.829601990049751	15.533371508050202	BRSK2
Transferrin Transport (GO:0033572)	1/7	0.137528	0.500529	0	0	7.829601990049751	15.533371508050202	TFRC
Positive Regulation of Microtubule Nucleation (GO:0090063)	1/7	0.137528	0.500529	0	0	7.829601990049751	15.533371508050202	PDE4DIP
+ Reg of Mt Outer Membrane Permeabilization Inv in Apoptotic Sgnlng Pway (GO:1901030)	1/7	0.137528	0.500529	0	0	7.829601990049751	15.533371508050202	SIVA1
Positive Regulation of Nitric-Oxide Synthase Activity (GO:0051000)	1/7	0.137528	0.500529	0	0	7.829601990049751	15.533371508050202	NUS1
Positive Regulation of Phospholipid Transport (GO:2001140)	1/7	0.137528	0.500529	0	0	7.829601990049751	15.533371508050202	PRELID1
Positive Regulation of Protein Polyubiquitination (GO:1902916)	1/7	0.137528	0.500529	0	0	7.829601990049751	15.533371508050202	UBE2N
Immune Response-Activating Cell Surface Receptor Signaling Pathway (GO:0002429)	1/7	0.137528	0.500529	0	0	7.829601990049751	15.533371508050202	LYN
Positive Regulation of Telomerase RNA Localization to Cajal Body (GO:1904874)	1/7	0.137528	0.500529	0	0	7.829601990049751	15.533371508050202	TCP1
Protein Localization to Cytoplasmic Stress Granule (GO:1903608)	1/7	0.137528	0.500529	0	0	7.829601990049751	15.533371508050202	DHX9
Methionine Metabolic Process (GO:0006555)	1/7	0.137528	0.500529	0	0	7.829601990049751	15.533371508050202	MTHFD1
Pyrimidine Ribonucleotide Biosynthetic Process (GO:0009220)	1/7	0.137528	0.500529	0	0	7.829601990049751	15.533371508050202	CTPS1
Motile Cilium Assembly (GO:0044458)	1/7	0.137528	0.500529	0	0	7.829601990049751	15.533371508050202	E2F4
Regulation of T Cell Apoptotic Process (GO:0070232)	1/7	0.137528	0.500529	0	0	7.829601990049751	15.533371508050202	PRELID1
Negative Regulation of DNA Damage Response, Signal Transduction by P53 Class Mediator (GO:0043518)	1/7	0.137528	0.500529	0	0	7.829601990049751	15.533371508050202	YJU2
Negative Regulation of DNA-templated DNA Replication (GO:2000104)	1/7	0.137528	0.500529	0	0	7.829601990049751	15.533371508050202	TIPIN
Negative Regulation of NLRP3 Inflammasome Complex Assembly (GO:1900226)	1/7	0.137528	0.500529	0	0	7.829601990049751	15.533371508050202	HSPA8
Regulation of Chromosome Condensation (GO:0060623)	1/7	0.137528	0.500529	0	0	7.829601990049751	15.533371508050202	NCAPD3
Regulation of DNA Replication (GO:0006275)	3/62	0.139923	0.504419	0	0	2.396520963425513	4.713152577316397	PCNA;DHX9;CDC6
Positive Regulation of Translation (GO:0045727)	4/96	0.141591	0.504419	0	0	2.051517637407711	4.0103326180945285	COA3;YTHDF1;DHX9;C1QBP
Protein-Containing Complex Organization (GO:0043933)	4/96	0.141591	0.504419	0	0	2.051517637407711	4.0103326180945285	NUP205;DHX9;GEMIN5;PDE4DIP
Positive Regulation of Smooth Muscle Cell Proliferation (GO:0048661)	2/32	0.143764	0.504419	0	0	3.137578027465668	6.085593143012419	DNMT1;RBPMS2
Regulation of Innate Immune Response (GO:0045088)	3/63	0.144788	0.504419	0	0	2.356390977443609	4.553681652270306	DDX39A;DHX9;POLR3G
Cytoplasmic Translation (GO:0002181)	4/98	0.149285	0.504419	0	0	2.0075471698113208	3.8181507080800183	RPS17;EIF3M;ETF1;RPL22L1
Ribosome Disassembly (GO:0032790)	2/33	0.151034	0.504419	0	0	3.036124199589223	5.739042261335963	MRRF;ZNF598
tRNA Methylation (GO:0030488)	2/33	0.151034	0.504419	0	0	3.036124199589223	5.739042261335963	THADA;MTO1
Regulation of Cell Growth (GO:0001558)	6/172	0.152013	0.504419	0	0	1.708277978835494	3.2180395647465008	SUPV3L1;DDX49;TFRC;NCBP1;EXOSC9;CRK
Regulation of Cellular Response to Stress (GO:0080135)	4/99	0.153191	0.504419	0	0	1.9862562065541212	3.7263509821398006	COPS3;SF3B3;POLR1B;UBE2N
Organic Anion Transport (GO:0015711)	3/65	0.154683	0.504419	0	0	2.280014552510308	4.255363848677071	SLC22A3;SLC25A17;MGST1
Negative Regulation of Locomotion (GO:0040013)	1/8	0.155571	0.504419	0	0	6.710554371002132	12.485992672357913	CRK
Regulation of mRNA 3'-End Processing (GO:0031440)	1/8	0.155571	0.504419	0	0	6.710554371002132	12.485992672357913	NCBP1
Negative Regulation of Protein Localization to Cell Surface (GO:2000009)	1/8	0.155571	0.504419	0	0	6.710554371002132	12.485992672357913	GPM6B
Aminoglycan Metabolic Process (GO:0006022)	1/8	0.155571	0.504419	0	0	6.710554371002132	12.485992672357913	CLN6
Negative Regulation of Toll-Like Receptor 4 Signaling Pathway (GO:0034144)	1/8	0.155571	0.504419	0	0	6.710554371002132	12.485992672357913	LYN
Arginine Metabolic Process (GO:0006525)	1/8	0.155571	0.504419	0	0	6.710554371002132	12.485992672357913	DDAH1
Astral Microtubule Organization (GO:0030953)	1/8	0.155571	0.504419	0	0	6.710554371002132	12.485992672357913	PDE4DIP
Neurotransmitter Uptake (GO:0001504)	1/8	0.155571	0.504419	0	0	6.710554371002132	12.485992672357913	SLC22A3
Nitric Oxide Mediated Signal Transduction (GO:0007263)	1/8	0.155571	0.504419	0	0	6.710554371002132	12.485992672357913	DDAH1
Regulation of Protein Localization to Cajal Body (GO:1904869)	1/8	0.155571	0.504419	0	0	6.710554371002132	12.485992672357913	TCP1
Biogenic Amine Metabolic Process (GO:0006576)	1/8	0.155571	0.504419	0	0	6.710554371002132	12.485992672357913	SLC22A3
Phagosome-Lysosome Fusion (GO:0090385)	1/8	0.155571	0.504419	0	0	6.710554371002132	12.485992672357913	RAB34
Polysaccharide Biosynthetic Process (GO:0000271)	1/8	0.155571	0.504419	0	0	6.710554371002132	12.485992672357913	DDX18
Positive Regulation of DNA-directed DNA Polymerase Activity (GO:1900264)	1/8	0.155571	0.504419	0	0	6.710554371002132	12.485992672357913	PCNA
Positive Regulation of Alpha-Beta T Cell Activation (GO:0046635)	1/8	0.155571	0.504419	0	0	6.710554371002132	12.485992672357913	HSPH1
Dendritic Cell Differentiation (GO:0097028)	1/8	0.155571	0.504419	0	0	6.710554371002132	12.485992672357913	LYN
Skeletal Muscle Tissue Regeneration (GO:0043403)	1/8	0.155571	0.504419	0	0	6.710554371002132	12.485992672357913	MCUB
Positive Regulation of Cellular Respiration (GO:1901857)	1/8	0.155571	0.504419	0	0	6.710554371002132	12.485992672357913	PRELID1
snRNA Transcription by RNA Polymerase III (GO:0042796)	1/8	0.155571	0.504419	0	0	6.710554371002132	12.485992672357913	ICE1
Sphingomyelin Metabolic Process (GO:0006684)	1/8	0.155571	0.504419	0	0	6.710554371002132	12.485992672357913	SMPD4
Positive Regulation of Lipid Transport (GO:0032370)	1/8	0.155571	0.504419	0	0	6.710554371002132	12.485992672357913	PRELID1
Formation of Translation Preinitiation Complex (GO:0001731)	1/8	0.155571	0.504419	0	0	6.710554371002132	12.485992672357913	DHX29
Glutamine Family Amino Acid Catabolic Process (GO:0009065)	1/8	0.155571	0.504419	0	0	6.710554371002132	12.485992672357913	DDAH1
Glutamine Transport (GO:0006868)	1/8	0.155571	0.504419	0	0	6.710554371002132	12.485992672357913	SLC38A5
Glycerol Metabolic Process (GO:0006071)	1/8	0.155571	0.504419	0	0	6.710554371002132	12.485992672357913	PGP
Positive Regulation of Protein Localization to Cajal Body (GO:1904871)	1/8	0.155571	0.504419	0	0	6.710554371002132	12.485992672357913	TCP1
Positive Regulation of Transcription of Nucleolar Large rRNA by RNA Polymerase I (GO:1901838)	1/8	0.155571	0.504419	0	0	6.710554371002132	12.485992672357913	NOL11
Lactation (GO:0007595)	1/8	0.155571	0.504419	0	0	6.710554371002132	12.485992672357913	COPS3
Long-Chain Fatty Acid Import Into Cell (GO:0044539)	1/8	0.155571	0.504419	0	0	6.710554371002132	12.485992672357913	SLC27A4
Protein Homotrimerization (GO:0070207)	1/8	0.155571	0.504419	0	0	6.710554371002132	12.485992672357913	PNPT1
Protein Trimerization (GO:0070206)	1/8	0.155571	0.504419	0	0	6.710554371002132	12.485992672357913	PNPT1
Mitochondrial tRNA Modification (GO:0070900)	1/8	0.155571	0.504419	0	0	6.710554371002132	12.485992672357913	MTO1
Monoubiquitinated Protein Deubiquitination (GO:0035520)	1/8	0.155571	0.504419	0	0	6.710554371002132	12.485992672357913	USP15
Protein Stabilization (GO:0050821)	6/174	0.157839	0.504419	0	0	1.6876697447039652	3.1157397079086486	CCT2;COPS3;STXBP4;TCP1;BAG1;NAA15
NADH Dehydrogenase Complex Assembly (GO:0010257)	2/34	0.158375	0.504419	0	0	2.941011235955056	5.41967331180144	NDUFAF4;NDUFS3
Positive Regulation of miRNA Transcription (GO:1902895)	2/34	0.158375	0.504419	0	0	2.941011235955056	5.41967331180144	NR3C1;ETS1
Inner Mitochondrial Membrane Organization (GO:0007007)	2/34	0.158375	0.504419	0	0	2.941011235955056	5.41967331180144	HSPA9;LETM1
mRNA Transcription by RNA Polymerase II (GO:0042789)	2/34	0.158375	0.504419	0	0	2.941011235955056	5.41967331180144	NCBP1;ATF4
Mitochondrial Respiratory Chain Complex I Assembly (GO:0032981)	2/34	0.158375	0.504419	0	0	2.941011235955056	5.41967331180144	NDUFAF4;NDUFS3
tRNA Modification (GO:0006400)	3/66	0.159708	0.504419	0	0	2.243644826351593	4.115753299529532	THADA;PUSL1;MTO1
Intrinsic Apoptotic Signaling Pathway (GO:0097193)	4/101	0.161119	0.504419	0	0	1.9449912468391364	3.550804782156166	BRSK2;SIVA1;MYBBP1A;ATF4
Cilium Organization (GO:0044782)	6/176	0.163762	0.504419	0	0	1.6675464101990607	3.01715774949271	ACTR3;C2CD3;ARL6;TMEM237;RAB34;IFT57
DNA-templated DNA Replication Maintenance of Fidelity (GO:0045005)	2/35	0.165781	0.504419	0	0	2.8516626943593235	5.124695480202617	TIPIN;PCNA
Nuclear Transport (GO:0051169)	2/35	0.165781	0.504419	0	0	2.8516626943593235	5.124695480202617	NUP205;NUP160
Sister Chromatid Segregation (GO:0000819)	2/35	0.165781	0.504419	0	0	2.8516626943593235	5.124695480202617	PPP1CC;ESPL1
Lysosome Localization (GO:0032418)	2/35	0.165781	0.504419	0	0	2.8516626943593235	5.124695480202617	RAB34;FAM98A
Positive Regulation of Endothelial Cell Migration (GO:0010595)	3/68	0.169905	0.504419	0	0	2.1742625795257373	3.8539138699498996	NUS1;SLTM;ETS1
D-glucose Import (GO:0046323)	1/9	0.173239	0.504419	0	0	5.871268656716418	10.292822889671738	SLC27A4
RISC Complex Assembly (GO:0070922)	1/9	0.173239	0.504419	0	0	5.871268656716418	10.292822889671738	DHX9
Negative Regulation of Smooth Muscle Cell Differentiation (GO:0051151)	1/9	0.173239	0.504419	0	0	5.871268656716418	10.292822889671738	RBPMS2
Regulation of Nitric-Oxide Synthase Activity (GO:0050999)	1/9	0.173239	0.504419	0	0	5.871268656716418	10.292822889671738	NUS1
Negative Regulation of Type II Interferon Production (GO:0032689)	1/9	0.173239	0.504419	0	0	5.871268656716418	10.292822889671738	C1QBP
One-Carbon Metabolic Process (GO:0006730)	1/9	0.173239	0.504419	0	0	5.871268656716418	10.292822889671738	MTHFD1
Regulation of Sequestering of Calcium Ion (GO:0051282)	1/9	0.173239	0.504419	0	0	5.871268656716418	10.292822889671738	DIAPH1
Regulation of Smooth Muscle Cell Apoptotic Process (GO:0034391)	1/9	0.173239	0.504419	0	0	5.871268656716418	10.292822889671738	BAG1
Peptidyl-Threonine Dephosphorylation (GO:0035970)	1/9	0.173239	0.504419	0	0	5.871268656716418	10.292822889671738	PPM1D
Pinocytosis (GO:0006907)	1/9	0.173239	0.504419	0	0	5.871268656716418	10.292822889671738	RAB34
Central Nervous System Myelination (GO:0022010)	1/9	0.173239	0.504419	0	0	5.871268656716418	10.292822889671738	GPM6B
Single Strand Break Repair (GO:0000012)	1/9	0.173239	0.504419	0	0	5.871268656716418	10.292822889671738	UNG
snRNA Transcription by RNA Polymerase II (GO:0042795)	1/9	0.173239	0.504419	0	0	5.871268656716418	10.292822889671738	ICE1
Spermatid Nucleus Differentiation (GO:0007289)	1/9	0.173239	0.504419	0	0	5.871268656716418	10.292822889671738	PSME4
Endosomal Lumen Acidification (GO:0048388)	1/9	0.173239	0.504419	0	0	5.871268656716418	10.292822889671738	ATP6V0B
Tetrahydrofolate Metabolic Process (GO:0046653)	1/9	0.173239	0.504419	0	0	5.871268656716418	10.292822889671738	MTHFD1
Ether Lipid Biosynthetic Process (GO:0008611)	1/9	0.173239	0.504419	0	0	5.871268656716418	10.292822889671738	SELENOI
Positive Regulation of Leukocyte Proliferation (GO:0070665)	1/9	0.173239	0.504419	0	0	5.871268656716418	10.292822889671738	LYN
Translational Termination (GO:0006415)	1/9	0.173239	0.504419	0	0	5.871268656716418	10.292822889671738	ETF1
Positive Regulation of Mitochondrial Membrane Permeability (GO:0035794)	1/9	0.173239	0.504419	0	0	5.871268656716418	10.292822889671738	SIVA1
Positive Regulation of Peptidase Activity (GO:0010952)	1/9	0.173239	0.504419	0	0	5.871268656716418	10.292822889671738	PRELID1
Glycophagy (GO:0061723)	1/9	0.173239	0.504419	0	0	5.871268656716418	10.292822889671738	WDR45
Positive Regulation of Protein Depolymerization (GO:1901881)	1/9	0.173239	0.504419	0	0	5.871268656716418	10.292822889671738	KATNB1
Hydrogen Peroxide Catabolic Process (GO:0042744)	1/9	0.173239	0.504419	0	0	5.871268656716418	10.292822889671738	PRDX3
Immune Response-Regulating Cell Surface Receptor Signaling Pathway (GO:0002768)	1/9	0.173239	0.504419	0	0	5.871268656716418	10.292822889671738	LYN
Lipid Import Into Cell (GO:0140354)	1/9	0.173239	0.504419	0	0	5.871268656716418	10.292822889671738	SLC27A4
mRNA Methylguanosine-Cap Decapping (GO:0110156)	1/9	0.173239	0.504419	0	0	5.871268656716418	10.292822889671738	PNRC2
Protein Insertion Into ER Membrane by Stop-Transfer Membrane-Anchor Sequence (GO:0045050)	1/9	0.173239	0.504419	0	0	5.871268656716418	10.292822889671738	EMC8
Protein Localization to Microtubule (GO:0035372)	1/9	0.173239	0.504419	0	0	5.871268656716418	10.292822889671738	DIAPH1
Protein Localization to Microtubule Cytoskeleton (GO:0072698)	1/9	0.173239	0.504419	0	0	5.871268656716418	10.292822889671738	DIAPH1
Pyrimidine Nucleobase Metabolic Process (GO:0006206)	1/9	0.173239	0.504419	0	0	5.871268656716418	10.292822889671738	CTPS1
rRNA 3'-End Processing (GO:0031125)	1/9	0.173239	0.504419	0	0	5.871268656716418	10.292822889671738	EXOSC9
Regulation of DNA-templated Transcription Initiation (GO:2000142)	1/9	0.173239	0.504419	0	0	5.871268656716418	10.292822889671738	PPM1D
Modified Amino Acid Transport (GO:0072337)	1/9	0.173239	0.504419	0	0	5.871268656716418	10.292822889671738	MGST1
Multicellular Organismal-Level Iron Ion Homeostasis (GO:0060586)	1/9	0.173239	0.504419	0	0	5.871268656716418	10.292822889671738	TFRC
Negative Regulation of Organelle Organization (GO:0010639)	2/36	0.173246	0.504419	0	0	2.767569949328046	4.851672891079127	PRELID1;TFRC
Ceramide Metabolic Process (GO:0006672)	2/36	0.173246	0.504419	0	0	2.767569949328046	4.851672891079127	SMPD4;CLN6
Ubiquitin-Dependent Protein Catabolic Process (GO:0006511)	11/381	0.175609	0.509699	0	0	1.4088204483553322	2.45063861122524	KCMF1;COPS3;PSMA3;PSMA2;HECW1;GID8;PSMC2;ARIH2;UBE2N;UFD1;DTL
Plasma Membrane Bounded Cell Projection Assembly (GO:0120031)	7/220	0.178377	0.509699	0	0	1.5532559223022615	2.677592387590356	ACTR3;C2CD3;ARL6;TMEM237;RAB34;SPATA13;IFT57
Erythrocyte Differentiation (GO:0030218)	2/37	0.180764	0.509699	0	0	2.6882825040128413	4.598471026206475	HSPA9;LYN
Regulation of Interferon-Beta Production (GO:0032648)	2/38	0.188331	0.509699	0	0	2.613399916770703	4.363212453617786	DHX9;POLR3G
RNA Transport (GO:0050658)	2/38	0.188331	0.509699	0	0	2.613399916770703	4.363212453617786	PNPT1;DDX39A
Negative Regulation of Response to Biotic Stimulus (GO:0002832)	2/38	0.188331	0.509699	0	0	2.613399916770703	4.363212453617786	DDX39A;C1QBP
Regulation of Protein Import Into Nucleus (GO:0042306)	2/38	0.188331	0.509699	0	0	2.613399916770703	4.363212453617786	YWHAB;IPO5
Regulation of Substrate Adhesion-Dependent Cell Spreading (GO:1900024)	2/38	0.188331	0.509699	0	0	2.613399916770703	4.363212453617786	C1QBP;CRK
Response to Unfolded Protein (GO:0006986)	2/38	0.188331	0.509699	0	0	2.613399916770703	4.363212453617786	HSPA8;HSPH1
Positive Regulation of Blood Vessel Endothelial Cell Migration (GO:0043536)	2/38	0.188331	0.509699	0	0	2.613399916770703	4.363212453617786	NUS1;ETS1
Positive Regulation of Cell Cycle G1/S Phase Transition (GO:1902808)	2/38	0.188331	0.509699	0	0	2.613399916770703	4.363212453617786	TFDP1;STXBP4
Positive Regulation of Tumor Necrosis Factor Production (GO:0032760)	2/38	0.188331	0.509699	0	0	2.613399916770703	4.363212453617786	DHX9;TNFRSF8
mRNA Transcription (GO:0009299)	2/38	0.188331	0.509699	0	0	2.613399916770703	4.363212453617786	NCBP1;ATF4
Regulation of Bone Mineralization (GO:0030500)	2/38	0.188331	0.509699	0	0	2.613399916770703	4.363212453617786	SLC20A2;GPM6B
CRD-mediated mRNA Stabilization (GO:0070934)	1/10	0.190538	0.509699	0	0	5.21849087893864	8.65175040068074	DHX9
Negative Regulation of Gene Expression via Chromosomal CpG Island Methylation (GO:0044027)	1/10	0.190538	0.509699	0	0	5.21849087893864	8.65175040068074	DNMT1
Negative Regulation of Inflammasome-Mediated Signaling Pathway (GO:0141086)	1/10	0.190538	0.509699	0	0	5.21849087893864	8.65175040068074	HSPA8
Regulation of Homotypic Cell-Cell Adhesion (GO:0034110)	1/10	0.190538	0.509699	0	0	5.21849087893864	8.65175040068074	LYN
N-terminal Protein Amino Acid Acetylation (GO:0006474)	1/10	0.190538	0.509699	0	0	5.21849087893864	8.65175040068074	NAA15
N-terminal Protein Amino Acid Modification (GO:0031365)	1/10	0.190538	0.509699	0	0	5.21849087893864	8.65175040068074	NAA15
RNA Localization to Cajal Body (GO:0090670)	1/10	0.190538	0.509699	0	0	5.21849087893864	8.65175040068074	TCP1
Regulation of Leukocyte Chemotaxis (GO:0002688)	1/10	0.190538	0.509699	0	0	5.21849087893864	8.65175040068074	LYN
Negative Regulation of Protein Import Into Nucleus (GO:0042308)	1/10	0.190538	0.509699	0	0	5.21849087893864	8.65175040068074	YWHAB
Aspartate Family Amino Acid Metabolic Process (GO:0009066)	1/10	0.190538	0.509699	0	0	5.21849087893864	8.65175040068074	MTHFD1
Regulation of Protein K63-linked Ubiquitination (GO:1900044)	1/10	0.190538	0.509699	0	0	5.21849087893864	8.65175040068074	UBE2N
Nuclear mRNA Surveillance (GO:0071028)	1/10	0.190538	0.509699	0	0	5.21849087893864	8.65175040068074	EXOSC9
Nuclear Pore Complex Assembly (GO:0051292)	1/10	0.190538	0.509699	0	0	5.21849087893864	8.65175040068074	NUP205
Body Fluid Secretion (GO:0007589)	1/10	0.190538	0.509699	0	0	5.21849087893864	8.65175040068074	COPS3
Regulation of Telomerase RNA Localization to Cajal Body (GO:1904872)	1/10	0.190538	0.509699	0	0	5.21849087893864	8.65175040068074	TCP1
Regulation of Transcription of Nucleolar Large rRNA by RNA Polymerase I (GO:1901836)	1/10	0.190538	0.509699	0	0	5.21849087893864	8.65175040068074	NOL11
Response to Muramyl Dipeptide (GO:0032495)	1/10	0.190538	0.509699	0	0	5.21849087893864	8.65175040068074	VIM
Cristae Formation (GO:0042407)	1/10	0.190538	0.509699	0	0	5.21849087893864	8.65175040068074	LETM1
Positive Regulation of mRNA Metabolic Process (GO:1903313)	1/10	0.190538	0.509699	0	0	5.21849087893864	8.65175040068074	PNPT1
Positive Regulation of Monooxygenase Activity (GO:0032770)	1/10	0.190538	0.509699	0	0	5.21849087893864	8.65175040068074	NUS1
Glycerolipid Metabolic Process (GO:0046486)	1/10	0.190538	0.509699	0	0	5.21849087893864	8.65175040068074	PGP
Growth Hormone Receptor Signaling Pathway via JAK-STAT (GO:0060397)	1/10	0.190538	0.509699	0	0	5.21849087893864	8.65175040068074	LYN
Hyaluronan Metabolic Process (GO:0030212)	1/10	0.190538	0.509699	0	0	5.21849087893864	8.65175040068074	DDX18
Positive Regulation of Ruffle Assembly (GO:1900029)	1/10	0.190538	0.509699	0	0	5.21849087893864	8.65175040068074	FAM98A
Protein Deneddylation (GO:0000338)	1/10	0.190538	0.509699	0	0	5.21849087893864	8.65175040068074	COPS3
Protein Localization to Nuclear Envelope (GO:0090435)	1/10	0.190538	0.509699	0	0	5.21849087893864	8.65175040068074	NUTF2
Regulation of B Cell Receptor Signaling Pathway (GO:0050855)	1/10	0.190538	0.509699	0	0	5.21849087893864	8.65175040068074	LYN
Regulation of Cell Cycle Checkpoint (GO:1901976)	1/10	0.190538	0.509699	0	0	5.21849087893864	8.65175040068074	POLR1B
Regulation of Cell Population Proliferation (GO:0042127)	14/517	0.195264	0.512393	0	0	1.3199391883990177	2.1559894203872965	LYN;TIPIN;TFRC;CDC6;PPM1D;ETS1;NME1;PRDX3;DDAH1;GID8;WWC3;TNFRSF8;UTP20;FAM98A
Positive Regulation of Defense Response (GO:0031349)	3/73	0.19616	0.512393	0	0	2.018152524167562	3.287214474076003	DHX9;POLR3G;ETS1
Positive Regulation of Supramolecular Fiber Organization (GO:1902905)	3/74	0.201527	0.512393	0	0	1.9895689929047973	3.1869532338062436	NAV3;SLTM;KATNB1
Cellular Response to Glucose Starvation (GO:0042149)	2/40	0.203588	0.512393	0	0	2.475458308693081	3.94008624976042	MYBBP1A;ATF4
Ephrin Receptor Signaling Pathway (GO:0048013)	2/40	0.203588	0.512393	0	0	2.475458308693081	3.94008624976042	LYN;CRK
Glycerophospholipid Metabolic Process (GO:0006650)	2/40	0.203588	0.512393	0	0	2.475458308693081	3.94008624976042	SMPD4;PGP
Positive Regulation of Tumor Necrosis Factor Superfamily Cytokine Production (GO:1903557)	2/40	0.203588	0.512393	0	0	2.475458308693081	3.94008624976042	DHX9;TNFRSF8
Positive Regulation of Programmed Cell Death (GO:0043068)	6/189	0.204437	0.512393	0	0	1.54746618462881	2.456598526564962	HSPA9;C1QBP;DDX20;TNFRSF8;ATF4;SLC27A4
Protein Localization to Nucleus (GO:0034504)	4/112	0.20715	0.512393	0	0	1.7453529000698813	2.7477289495305537	HEATR1;RRS1;NUTF2;IPO5
Mitotic Sister Chromatid Segregation (GO:0000070)	4/112	0.20715	0.512393	0	0	1.7453529000698813	2.7477289495305537	PPP1CC;ESPL1;RRS1;NCAPD3
Regulation of Chromosome Separation (GO:1905818)	1/11	0.207477	0.512393	0	0	4.696268656716418	7.38599174185838	NCAPD3
Negative Regulation of Defense Response to Virus (GO:0050687)	1/11	0.207477	0.512393	0	0	4.696268656716418	7.38599174185838	C1QBP
Negative Regulation of Gluconeogenesis (GO:0045721)	1/11	0.207477	0.512393	0	0	4.696268656716418	7.38599174185838	PGP
Negative Regulation of Interleukin-2 Production (GO:0032703)	1/11	0.207477	0.512393	0	0	4.696268656716418	7.38599174185838	NAV3
RNA Splicing, via Endonucleolytic Cleavage and Ligation (GO:0000394)	1/11	0.207477	0.512393	0	0	4.696268656716418	7.38599174185838	FAM98A
- Reg of Nuclear-Transcribed mRNA Cat Proc, Deadenylation-Dep Decay (GO:1900152)	1/11	0.207477	0.512393	0	0	4.696268656716418	7.38599174185838	DHX9
T Cell Homeostasis (GO:0043029)	1/11	0.207477	0.512393	0	0	4.696268656716418	7.38599174185838	SIVA1
Regulation of Mitochondrial Fusion (GO:0010635)	1/11	0.207477	0.512393	0	0	4.696268656716418	7.38599174185838	TFRC
Autonomic Nervous System Development (GO:0048483)	1/11	0.207477	0.512393	0	0	4.696268656716418	7.38599174185838	KIF26A
Base-Excision Repair, AP Site Formation (GO:0006285)	1/11	0.207477	0.512393	0	0	4.696268656716418	7.38599174185838	UNG
Base-Excision Repair, Gap-Filling (GO:0006287)	1/11	0.207477	0.512393	0	0	4.696268656716418	7.38599174185838	FEN1
Nuclear Body Organization (GO:0030575)	1/11	0.207477	0.512393	0	0	4.696268656716418	7.38599174185838	ETS1
Regulation of Retrograde Protein Transport, ER to Cytosol (GO:1904152)	1/11	0.207477	0.512393	0	0	4.696268656716418	7.38599174185838	BRSK2
Regulation of Smooth Muscle Cell Differentiation (GO:0051150)	1/11	0.207477	0.512393	0	0	4.696268656716418	7.38599174185838	RBPMS2
Pancreas Development (GO:0031016)	1/11	0.207477	0.512393	0	0	4.696268656716418	7.38599174185838	SLTM
Phagolysosome Assembly (GO:0001845)	1/11	0.207477	0.512393	0	0	4.696268656716418	7.38599174185838	RAB34
Cellular Response to Exogenous dsRNA (GO:0071360)	1/11	0.207477	0.512393	0	0	4.696268656716418	7.38599174185838	DHX9
Cellular Response to Interferon-Beta (GO:0035458)	1/11	0.207477	0.512393	0	0	4.696268656716418	7.38599174185838	PNPT1
Response to Misfolded Protein (GO:0051788)	1/11	0.207477	0.512393	0	0	4.696268656716418	7.38599174185838	UFD1
Skin Epidermis Development (GO:0098773)	1/11	0.207477	0.512393	0	0	4.696268656716418	7.38599174185838	SLTM
Digestive Tract Morphogenesis (GO:0048546)	1/11	0.207477	0.512393	0	0	4.696268656716418	7.38599174185838	RBPMS2
tRNA Splicing, via Endonucleolytic Cleavage and Ligation (GO:0006388)	1/11	0.207477	0.512393	0	0	4.696268656716418	7.38599174185838	FAM98A
Establishment of Skin Barrier (GO:0061436)	1/11	0.207477	0.512393	0	0	4.696268656716418	7.38599174185838	SLTM
Establishment of Spindle Localization (GO:0051293)	1/11	0.207477	0.512393	0	0	4.696268656716418	7.38599174185838	ESPL1
Ether Lipid Metabolic Process (GO:0046485)	1/11	0.207477	0.512393	0	0	4.696268656716418	7.38599174185838	SELENOI
Positive Regulation of Metaphase/Anaphase Transition of Cell Cycle (GO:1902101)	1/11	0.207477	0.512393	0	0	4.696268656716418	7.38599174185838	ESPL1
Folic Acid-Containing Compound Metabolic Process (GO:0006760)	1/11	0.207477	0.512393	0	0	4.696268656716418	7.38599174185838	MTHFD1L
Vascular Endothelial Growth Factor Signaling Pathway (GO:0038084)	1/11	0.207477	0.512393	0	0	4.696268656716418	7.38599174185838	NUS1
Positive Regulation of Response to Cytokine Stimulus (GO:0060760)	1/11	0.207477	0.512393	0	0	4.696268656716418	7.38599174185838	DHX9
Lipopolysaccharide-Mediated Signaling Pathway (GO:0031663)	1/11	0.207477	0.512393	0	0	4.696268656716418	7.38599174185838	LYN
Purine Ribonucleotide Catabolic Process (GO:0009154)	1/11	0.207477	0.512393	0	0	4.696268656716418	7.38599174185838	PRTFDC1
Mitochondrial Fission (GO:0000266)	1/11	0.207477	0.512393	0	0	4.696268656716418	7.38599174185838	GDAP1
Mitotic intra-S DNA Damage Checkpoint Signaling (GO:0031573)	1/11	0.207477	0.512393	0	0	4.696268656716418	7.38599174185838	TIPIN
Organic Cation Transport (GO:0015695)	2/41	0.211267	0.51819	0	0	2.4117929511187937	3.749447325203615	SLC22A3;SLC38A5
Regulation of Telomere Maintenance via Telomerase (GO:0032210)	2/41	0.211267	0.51819	0	0	2.4117929511187937	3.749447325203615	CCT2;TCP1
Positive Regulation of Nucleocytoplasmic Transport (GO:0046824)	2/41	0.211267	0.51819	0	0	2.4117929511187937	3.749447325203615	DHX9;IPO5
Positive Regulation of Protein-Containing Complex Assembly (GO:0031334)	3/77	0.217827	0.51819	0	0	1.908453566348303	2.9085847460494296	ICE1;TFRC;DHX33
Establishment of Protein Localization to Mitochondrion (GO:0072655)	2/42	0.218975	0.51819	0	0	2.351310861423221	3.5711615839903654	TIMM44;GDAP1
Myelination (GO:0042552)	2/42	0.218975	0.51819	0	0	2.351310861423221	3.5711615839903654	SELENOI;GPM6B
ATP Transport (GO:0015867)	1/12	0.224062	0.51819	0	0	4.26899592944369	6.3857011378195105	SLC25A17
Negative Regulation of Myeloid Cell Differentiation (GO:0045638)	1/12	0.224062	0.51819	0	0	4.26899592944369	6.3857011378195105	HSPA9
Regulation of Intrinsic Apoptotic Signaling Pathway in Response to DNA Damage (GO:1902229)	1/12	0.224062	0.51819	0	0	4.26899592944369	6.3857011378195105	DDIAS
Negative Regulation of Release of Cytochrome C From Mitochondria (GO:0090201)	1/12	0.224062	0.51819	0	0	4.26899592944369	6.3857011378195105	PRELID1
Negative Regulation of Signal Transduction by P53 Class Mediator (GO:1901797)	1/12	0.224062	0.51819	0	0	4.26899592944369	6.3857011378195105	YJU2
Regulation of Monocyte Chemotaxis (GO:0090025)	1/12	0.224062	0.51819	0	0	4.26899592944369	6.3857011378195105	LYN
Negative Regulation of Vascular Permeability (GO:0043116)	1/12	0.224062	0.51819	0	0	4.26899592944369	6.3857011378195105	DDAH1
Regulation of Phosphate Metabolic Process (GO:0019220)	1/12	0.224062	0.51819	0	0	4.26899592944369	6.3857011378195105	MCM7
Non-Proteinogenic Amino Acid Metabolic Process (GO:0170041)	1/12	0.224062	0.51819	0	0	4.26899592944369	6.3857011378195105	DDAH1
Regulation of Systemic Arterial Blood Pressure (GO:0003073)	1/12	0.224062	0.51819	0	0	4.26899592944369	6.3857011378195105	DDAH1
Cellular Response to Corticosteroid Stimulus (GO:0071384)	1/12	0.224062	0.51819	0	0	4.26899592944369	6.3857011378195105	NR3C1
Cellular Response to Lectin (GO:1990858)	1/12	0.224062	0.51819	0	0	4.26899592944369	6.3857011378195105	LYN
Positive Chemotaxis (GO:0050918)	1/12	0.224062	0.51819	0	0	4.26899592944369	6.3857011378195105	SLTM
Positive Regulation of DNA Binding (GO:0043388)	1/12	0.224062	0.51819	0	0	4.26899592944369	6.3857011378195105	NME1
Positive Regulation of calcineurin-NFAT Signaling Cascade (GO:0070886)	1/12	0.224062	0.51819	0	0	4.26899592944369	6.3857011378195105	PTBP1
Positive Regulation of Calcineurin-Mediated Signaling (GO:0106058)	1/12	0.224062	0.51819	0	0	4.26899592944369	6.3857011378195105	PTBP1
snRNA Transcription (GO:0009301)	1/12	0.224062	0.51819	0	0	4.26899592944369	6.3857011378195105	ICE1
Positive Regulation of Endothelial Cell Chemotaxis (GO:2001028)	1/12	0.224062	0.51819	0	0	4.26899592944369	6.3857011378195105	SLTM
Stimulatory C-type Lectin Receptor Signaling Pathway (GO:0002223)	1/12	0.224062	0.51819	0	0	4.26899592944369	6.3857011378195105	LYN
Sulfur Amino Acid Metabolic Process (GO:0000096)	1/12	0.224062	0.51819	0	0	4.26899592944369	6.3857011378195105	MTHFD1
tRNA Aminoacylation (GO:0043039)	1/12	0.224062	0.51819	0	0	4.26899592944369	6.3857011378195105	MARS2
Epithelial Cell Morphogenesis (GO:0003382)	1/12	0.224062	0.51819	0	0	4.26899592944369	6.3857011378195105	SLTM
Positive Regulation of Immunoglobulin Mediated Immune Response (GO:0002891)	1/12	0.224062	0.51819	0	0	4.26899592944369	6.3857011378195105	TFRC
Positive Regulation of Leukocyte Adhesion to Vascular Endothelial Cell (GO:1904996)	1/12	0.224062	0.51819	0	0	4.26899592944369	6.3857011378195105	ETS1
Xenobiotic Transport (GO:0042908)	1/12	0.224062	0.51819	0	0	4.26899592944369	6.3857011378195105	SLC22A3
Glycerolipid Catabolic Process (GO:0046503)	1/12	0.224062	0.51819	0	0	4.26899592944369	6.3857011378195105	SMPD4
Hydrogen Peroxide Metabolic Process (GO:0042743)	1/12	0.224062	0.51819	0	0	4.26899592944369	6.3857011378195105	PRDX3
Post-Translational Protein Targeting to Endoplasmic Reticulum Membrane (GO:0006620)	1/12	0.224062	0.51819	0	0	4.26899592944369	6.3857011378195105	SEC61A1
Primary miRNA Processing (GO:0031053)	1/12	0.224062	0.51819	0	0	4.26899592944369	6.3857011378195105	NCBP1
Protein Heterotetramerization (GO:0051290)	1/12	0.224062	0.51819	0	0	4.26899592944369	6.3857011378195105	FARSB
Mitochondrial Transcription (GO:0006390)	1/12	0.224062	0.51819	0	0	4.26899592944369	6.3857011378195105	POLRMT
Mitochondrion Distribution (GO:0048311)	1/12	0.224062	0.51819	0	0	4.26899592944369	6.3857011378195105	CLUH
Organelle Organization (GO:0006996)	10/361	0.224905	0.519118	0	0	1.346951346951347	2.009754650758534	PRDX3;LETM1;SUPV3L1;DIAPH1;SEC61A1;YTHDF1;SMPD4;CLUH;PNPT1;RAB34
Positive Regulation of Apoptotic Process (GO:0043065)	7/236	0.225214	0.519118	0	0	1.4428647621587387	2.150885684362797	HSPA9;MYBBP1A;C1QBP;DDX20;TNFRSF8;ATF4;SLC27A4
Protein Polymerization (GO:0051258)	2/43	0.226707	0.520823	0	0	2.2937791175664564	3.4041909903852914	DIAPH1;ARL6
Regulation of Blood Vessel Endothelial Cell Migration (GO:0043535)	2/43	0.226707	0.520823	0	0	2.2937791175664564	3.4041909903852914	NUS1;ETS1
Enzyme-Linked Receptor Protein Signaling Pathway (GO:0007167)	3/79	0.228842	0.521722	0	0	1.857934309457855	2.739939588483121	LYN;SLTM;CRK
Negative Regulation of Phosphorylation (GO:0042326)	2/44	0.234458	0.521722	0	0	2.238986980560014	3.2476055009778944	PRDX3;LYN
Regulation of Proteasomal Protein Catabolic Process (GO:0061136)	2/44	0.234458	0.521722	0	0	2.238986980560014	3.2476055009778944	PSME3;PSMC2
Positive Regulation of Immune Response (GO:0050778)	2/44	0.234458	0.521722	0	0	2.238986980560014	3.2476055009778944	DHX9;POLR3G
Positive Regulation of mRNA Catabolic Process (GO:0061014)	2/44	0.234458	0.521722	0	0	2.238986980560014	3.2476055009778944	YTHDF1;PNPT1
Mitotic G2/M Transition Checkpoint (GO:0044818)	2/44	0.234458	0.521722	0	0	2.238986980560014	3.2476055009778944	CDC6;DTL
Cellular Component Assembly (GO:0022607)	6/198	0.234529	0.521722	0	0	1.4738593155893536	2.137358296636614	DDX18;YTHDF1;DHX9;GEMIN5;PDE4DIP;GPM6B
RNA Biosynthetic Process (GO:0032774)	4/119	0.238206	0.521722	0	0	1.6381952420016408	2.350189720702184	HNRNPF;EXOSC9;XRN2;DDX20
Membraneless Organelle Assembly (GO:0140694)	4/119	0.238206	0.521722	0	0	1.6381952420016408	2.350189720702184	YTHDF1;DHX37;DHX29;E2F4
Arp2/3 Complex-Mediated Actin Nucleation (GO:0034314)	1/13	0.240302	0.521722	0	0	3.9129353233830844	5.5792991697157674	ACTR3
Regulation of Endopeptidase Activity (GO:0052548)	1/13	0.240302	0.521722	0	0	3.9129353233830844	5.5792991697157674	PRELID1
DNA-templated Transcription Termination (GO:0006353)	1/13	0.240302	0.521722	0	0	3.9129353233830844	5.5792991697157674	XRN2
Regulation of Inflammatory Response to Antigenic Stimulus (GO:0002861)	1/13	0.240302	0.521722	0	0	3.9129353233830844	5.5792991697157674	LYN
Regulation of Isotype Switching (GO:0045191)	1/13	0.240302	0.521722	0	0	3.9129353233830844	5.5792991697157674	TFRC
Regulation of Protein-Containing Complex Disassembly (GO:0043244)	1/13	0.240302	0.521722	0	0	3.9129353233830844	5.5792991697157674	ETF1
Regulation of Response to Cytokine Stimulus (GO:0060759)	1/13	0.240302	0.521722	0	0	3.9129353233830844	5.5792991697157674	DHX9
Regulation of Trophoblast Cell Migration (GO:1901163)	1/13	0.240302	0.521722	0	0	3.9129353233830844	5.5792991697157674	C1QBP
Cellular Response to Glucocorticoid Stimulus (GO:0071385)	1/13	0.240302	0.521722	0	0	3.9129353233830844	5.5792991697157674	NR3C1
Positive Regulation of Chromosome Separation (GO:1905820)	1/13	0.240302	0.521722	0	0	3.9129353233830844	5.5792991697157674	NCAPD3
Positive Regulation of Collagen Biosynthetic Process (GO:0032967)	1/13	0.240302	0.521722	0	0	3.9129353233830844	5.5792991697157674	VIM
Positive Regulation of Collagen Metabolic Process (GO:0010714)	1/13	0.240302	0.521722	0	0	3.9129353233830844	5.5792991697157674	VIM
Positive Regulation of Cytoplasmic Translation (GO:2000767)	1/13	0.240302	0.521722	0	0	3.9129353233830844	5.5792991697157674	DHX9
Spliceosomal tri-snRNP Complex Assembly (GO:0000244)	1/13	0.240302	0.521722	0	0	3.9129353233830844	5.5792991697157674	DDX20
Tail-Anchored Membrane Protein Insertion Into ER Membrane (GO:0071816)	1/13	0.240302	0.521722	0	0	3.9129353233830844	5.5792991697157674	EMC8
Positive Regulation of Isotype Switching (GO:0045830)	1/13	0.240302	0.521722	0	0	3.9129353233830844	5.5792991697157674	TFRC
Filopodium Assembly (GO:0046847)	1/13	0.240302	0.521722	0	0	3.9129353233830844	5.5792991697157674	SPATA13
Formation of Cytoplasmic Translation Initiation Complex (GO:0001732)	1/13	0.240302	0.521722	0	0	3.9129353233830844	5.5792991697157674	EIF3M
Positive Regulation of Mitotic Metaphase/Anaphase Transition (GO:0045842)	1/13	0.240302	0.521722	0	0	3.9129353233830844	5.5792991697157674	ESPL1
Innate Immune Response Activating Cell Surface Receptor Signaling Pathway (GO:0002220)	1/13	0.240302	0.521722	0	0	3.9129353233830844	5.5792991697157674	LYN
Lymphocyte Proliferation (GO:0046651)	1/13	0.240302	0.521722	0	0	3.9129353233830844	5.5792991697157674	CTPS1
Protein Localization to Phagophore Assembly Site (GO:0034497)	1/13	0.240302	0.521722	0	0	3.9129353233830844	5.5792991697157674	WDR45
Pseudouridine Synthesis (GO:0001522)	1/13	0.240302	0.521722	0	0	3.9129353233830844	5.5792991697157674	PUSL1
Microtubule Depolymerization (GO:0007019)	1/13	0.240302	0.521722	0	0	3.9129353233830844	5.5792991697157674	KATNB1
Mitotic G1 DNA Damage Checkpoint Signaling (GO:0031571)	1/13	0.240302	0.521722	0	0	3.9129353233830844	5.5792991697157674	POLR1B
Regulation of DNA Damage Checkpoint (GO:2000001)	1/13	0.240302	0.521722	0	0	3.9129353233830844	5.5792991697157674	POLR1B
Positive Regulation of Chromosome Organization (GO:2001252)	2/45	0.242224	0.524249	0	0	2.1867433150422437	3.1005696962507985	FEN1;NCAPD3
Mitotic Nuclear Division (GO:0140014)	2/45	0.242224	0.524249	0	0	2.1867433150422437	3.1005696962507985	PPP1CC;ESPL1
Regulation of DNA Repair (GO:0006282)	4/120	0.242731	0.524526	0	0	1.623942745608328	2.299180738152164	PCNA;SF3B3;DHX9;UBE2N
Organelle Assembly (GO:0070925)	8/284	0.244354	0.527211	0	0	1.368204786495641	1.9279863176883996	ACTR3;YTHDF1;C2CD3;ARL6;TMEM237;RAB34;WDR45;IFT57
Negative Regulation of Innate Immune Response (GO:0045824)	2/46	0.250001	0.530883	0	0	2.136874361593463	2.962331323454745	USP15;DDX39A
Endoplasmic Reticulum Organization (GO:0007029)	2/46	0.250001	0.530883	0	0	2.136874361593463	2.962331323454745	SEC61A1;SMPD4
Positive Regulation of DNA Repair (GO:0045739)	3/83	0.251165	0.530883	0	0	1.7644736842105264	2.4378780328648797	PCNA;DHX9;UBE2N
Negative Regulation of Inflammatory Response to Antigenic Stimulus (GO:0002862)	1/14	0.256203	0.530883	0	0	3.6116532721010333	4.918302162683273	LYN
Actin Nucleation (GO:0045010)	1/14	0.256203	0.530883	0	0	3.6116532721010333	4.918302162683273	ACTR3
Nuclear Pore Organization (GO:0006999)	1/14	0.256203	0.530883	0	0	3.6116532721010333	4.918302162683273	NUP205
Oligodendrocyte Development (GO:0014003)	1/14	0.256203	0.530883	0	0	3.6116532721010333	4.918302162683273	GPM6B
Cellular Response to dsRNA (GO:0071359)	1/14	0.256203	0.530883	0	0	3.6116532721010333	4.918302162683273	DHX9
Positive Regulation of B Cell Proliferation (GO:0030890)	1/14	0.256203	0.530883	0	0	3.6116532721010333	4.918302162683273	TFRC
Chemokine-Mediated Signaling Pathway (GO:0070098)	1/14	0.256203	0.530883	0	0	3.6116532721010333	4.918302162683273	LYN
Cotranslational Protein Targeting to Membrane (GO:0006613)	1/14	0.256203	0.530883	0	0	3.6116532721010333	4.918302162683273	SEC61A1
Ribosomal Large Subunit Assembly (GO:0000027)	1/14	0.256203	0.530883	0	0	3.6116532721010333	4.918302162683273	RRS1
Embryonic Digestive Tract Development (GO:0048566)	1/14	0.256203	0.530883	0	0	3.6116532721010333	4.918302162683273	RBPMS2
tRNA Wobble Uridine Modification (GO:0002098)	1/14	0.256203	0.530883	0	0	3.6116532721010333	4.918302162683273	MTO1
Positive Regulation of Mitochondrial Translation (GO:0070131)	1/14	0.256203	0.530883	0	0	3.6116532721010333	4.918302162683273	COA3
Glycogen Catabolic Process (GO:0005980)	1/14	0.256203	0.530883	0	0	3.6116532721010333	4.918302162683273	WDR45
Growth Hormone Receptor Signaling Pathway (GO:0060396)	1/14	0.256203	0.530883	0	0	3.6116532721010333	4.918302162683273	LYN
Import Into Cell (GO:0098657)	1/14	0.256203	0.530883	0	0	3.6116532721010333	4.918302162683273	SLC27A4
Intraciliary Anterograde Transport (GO:0035720)	1/14	0.256203	0.530883	0	0	3.6116532721010333	4.918302162683273	IFT57
Iron Ion Transport (GO:0006826)	1/14	0.256203	0.530883	0	0	3.6116532721010333	4.918302162683273	TFRC
Protein Insertion Into Membrane (GO:0051205)	1/14	0.256203	0.530883	0	0	3.6116532721010333	4.918302162683273	SEC61A1
rRNA Catabolic Process (GO:0016075)	1/14	0.256203	0.530883	0	0	3.6116532721010333	4.918302162683273	EXOSC9
rRNA Transcription (GO:0009303)	1/14	0.256203	0.530883	0	0	3.6116532721010333	4.918302162683273	GTF3A
Mitotic G1/S Transition Checkpoint Signaling (GO:0044819)	1/14	0.256203	0.530883	0	0	3.6116532721010333	4.918302162683273	POLR1B
Mitotic Chromosome Condensation (GO:0007076)	1/14	0.256203	0.530883	0	0	3.6116532721010333	4.918302162683273	NCAPD3
Cellular Response to Starvation (GO:0009267)	4/123	0.256421	0.530883	0	0	1.5826224829554463	2.1538471968831154	HSPA8;MYBBP1A;WDR45;ATF4
Protein Localization to Organelle (GO:0033365)	4/123	0.256421	0.530883	0	0	1.5826224829554463	2.1538471968831154	SEC61A1;ARL6;DHX9;POLR1B
Regulation of Microtubule Polymerization (GO:0031113)	2/47	0.257785	0.531321	0	0	2.089221806075739	2.8322114413938055	NAV3;SLTM
Regulation of Smoothened Signaling Pathway (GO:0008589)	2/47	0.257785	0.531321	0	0	2.089221806075739	2.8322114413938055	TEDC2;RAB34
Inorganic Anion Transmembrane Transport (GO:0098661)	2/47	0.257785	0.531321	0	0	2.089221806075739	2.8322114413938055	SLC20A2;SLC20A1
Positive Regulation of Cellular Process (GO:0048522)	11/419	0.262119	0.539449	0	0	1.2736358109135126	1.7053454727664616	PRDX3;LYN;SUPV3L1;TIPIN;DDX49;NCBP1;C1QBP;EXOSC9;GID8;FAM98A;CRK
Regulation of Mitotic Metaphase/Anaphase Transition (GO:0030071)	2/48	0.265573	0.540029	0	0	2.043641100797916	2.7095959157585483	ESPL1;CDC6
Regulation of Collagen Biosynthetic Process (GO:0032965)	1/15	0.271772	0.540029	0	0	3.353411513859275	4.368798660934114	VIM
DNA Double-Strand Break Processing (GO:0000729)	1/15	0.271772	0.540029	0	0	3.353411513859275	4.368798660934114	UBE2N
DNA Methylation-Dependent Constitutive Heterochromatin Formation (GO:0006346)	1/15	0.271772	0.540029	0	0	3.353411513859275	4.368798660934114	PPM1D
Negative Regulation of Intracellular Protein Transport (GO:0090317)	1/15	0.271772	0.540029	0	0	3.353411513859275	4.368798660934114	YWHAB
Negative Regulation of Ossification (GO:0030279)	1/15	0.271772	0.540029	0	0	3.353411513859275	4.368798660934114	CHSY1
Autophagy of Peroxisome (GO:0030242)	1/15	0.271772	0.540029	0	0	3.353411513859275	4.368798660934114	WDR45
Nucleotide Biosynthetic Process (GO:0009165)	1/15	0.271772	0.540029	0	0	3.353411513859275	4.368798660934114	MTHFD1
Pexophagy (GO:0000425)	1/15	0.271772	0.540029	0	0	3.353411513859275	4.368798660934114	WDR45
Phagosome Maturation (GO:0090382)	1/15	0.271772	0.540029	0	0	3.353411513859275	4.368798660934114	RAB34
Cellular Response to Misfolded Protein (GO:0071218)	1/15	0.271772	0.540029	0	0	3.353411513859275	4.368798660934114	UFD1
Sulfur Compound Transport (GO:0072348)	1/15	0.271772	0.540029	0	0	3.353411513859275	4.368798660934114	MGST1
Positive Regulation of Interferon-Alpha Production (GO:0032727)	1/15	0.271772	0.540029	0	0	3.353411513859275	4.368798660934114	DHX9
Excitatory Postsynaptic Potential (GO:0060079)	1/15	0.271772	0.540029	0	0	3.353411513859275	4.368798660934114	SLTM
Positive Regulation of Mitotic Sister Chromatid Separation (GO:1901970)	1/15	0.271772	0.540029	0	0	3.353411513859275	4.368798660934114	ESPL1
Positive Regulation of Nitric Oxide Biosynthetic Process (GO:0045429)	1/15	0.271772	0.540029	0	0	3.353411513859275	4.368798660934114	DDAH1
Positive Regulation of Nitric Oxide Metabolic Process (GO:1904407)	1/15	0.271772	0.540029	0	0	3.353411513859275	4.368798660934114	DDAH1
Glycerophospholipid Catabolic Process (GO:0046475)	1/15	0.271772	0.540029	0	0	3.353411513859275	4.368798660934114	SMPD4
Positive Regulation of Translational Initiation (GO:0045948)	1/15	0.271772	0.540029	0	0	3.353411513859275	4.368798660934114	YTHDF1
Positive Regulation of Vascular Associated Smooth Muscle Cell Proliferation (GO:1904707)	1/15	0.271772	0.540029	0	0	3.353411513859275	4.368798660934114	DNMT1
Mammary Gland Development (GO:0030879)	1/15	0.271772	0.540029	0	0	3.353411513859275	4.368798660934114	COPS3
Regulation of Golgi Organization (GO:1903358)	1/15	0.271772	0.540029	0	0	3.353411513859275	4.368798660934114	PDE4DIP
Negative Regulation of Calcium Ion Transmembrane Transport (GO:1903170)	1/15	0.271772	0.540029	0	0	3.353411513859275	4.368798660934114	MCUB
Negative Regulation of Cell Communication (GO:0010648)	1/15	0.271772	0.540029	0	0	3.353411513859275	4.368798660934114	KIF26A
Regulation of miRNA Transcription (GO:1902893)	2/49	0.27336	0.540855	0	0	2.0	2.5939280539945915	NR3C1;ETS1
Embryonic Organ Development (GO:0048568)	2/49	0.27336	0.540855	0	0	2.0	2.5939280539945915	TEAD4;ATF4
Negative Regulation of NF-kappaB Transcription Factor Activity (GO:0032088)	2/49	0.27336	0.540855	0	0	2.0	2.5939280539945915	CHUK;SIVA1
Cellular Response to Chemical Stress (GO:0062197)	3/87	0.27379	0.540932	0	0	1.6799140708915146	2.176147419177074	PRDX3;PNPT1;ATF4
Cytoplasmic Microtubule Organization (GO:0031122)	2/50	0.281145	0.546002	0	0	1.9581772784019975	2.484702206929207	KATNB1;PDE4DIP
Positive Regulation of Cell-Substrate Adhesion (GO:0010811)	2/50	0.281145	0.546002	0	0	1.9581772784019975	2.484702206929207	C1QBP;CRK
Regulation of Dendritic Spine Development (GO:0060998)	1/16	0.287016	0.546002	0	0	3.129601990049751	3.9064183320167127	LLPH
Regulation of Endothelial Cell Chemotaxis (GO:2001026)	1/16	0.287016	0.546002	0	0	3.129601990049751	3.9064183320167127	SLTM
Fc Receptor Mediated Stimulatory Signaling Pathway (GO:0002431)	1/16	0.287016	0.546002	0	0	3.129601990049751	3.9064183320167127	LYN
Fc-gamma Receptor Signaling Pathway Involved in Phagocytosis (GO:0038096)	1/16	0.287016	0.546002	0	0	3.129601990049751	3.9064183320167127	LYN
Regulation of Fibroblast Migration (GO:0010762)	1/16	0.287016	0.546002	0	0	3.129601990049751	3.9064183320167127	DDX18
Regulation of Generation of Precursor Metabolites and Energy (GO:0043467)	1/16	0.287016	0.546002	0	0	3.129601990049751	3.9064183320167127	PNPT1
Regulation of Interferon-Alpha Production (GO:0032647)	1/16	0.287016	0.546002	0	0	3.129601990049751	3.9064183320167127	DHX9
Regulation of Keratinocyte Proliferation (GO:0010837)	1/16	0.287016	0.546002	0	0	3.129601990049751	3.9064183320167127	STXBP4
Amide Transport (GO:0042886)	1/16	0.287016	0.546002	0	0	3.129601990049751	3.9064183320167127	SLC38A5
Negative Regulation of Translational Initiation (GO:0045947)	1/16	0.287016	0.546002	0	0	3.129601990049751	3.9064183320167127	ZNF598
Phosphatidylethanolamine Metabolic Process (GO:0046337)	1/16	0.287016	0.546002	0	0	3.129601990049751	3.9064183320167127	SELENOI
poly(A)+ mRNA Export From Nucleus (GO:0016973)	1/16	0.287016	0.546002	0	0	3.129601990049751	3.9064183320167127	NXF1
Response to Exogenous dsRNA (GO:0043330)	1/16	0.287016	0.546002	0	0	3.129601990049751	3.9064183320167127	DHX9
Positive Regulation of NLRP3 Inflammasome Complex Assembly (GO:1900227)	1/16	0.287016	0.546002	0	0	3.129601990049751	3.9064183320167127	DHX33
Response to Interferon-Beta (GO:0035456)	1/16	0.287016	0.546002	0	0	3.129601990049751	3.9064183320167127	PNPT1
Positive Regulation of Autophagosome Assembly (GO:2000786)	1/16	0.287016	0.546002	0	0	3.129601990049751	3.9064183320167127	WDR45
Embryonic Organ Morphogenesis (GO:0048562)	1/16	0.287016	0.546002	0	0	3.129601990049751	3.9064183320167127	RBPMS2
Endoplasmic Reticulum to Cytosol Transport (GO:1903513)	1/16	0.287016	0.546002	0	0	3.129601990049751	3.9064183320167127	UFD1
Positive Regulation of Inflammasome-Mediated Signaling Pathway (GO:0141087)	1/16	0.287016	0.546002	0	0	3.129601990049751	3.9064183320167127	DHX33
Establishment of Protein Localization to Endoplasmic Reticulum (GO:0072599)	1/16	0.287016	0.546002	0	0	3.129601990049751	3.9064183320167127	SEC61A1
Ganglioside Metabolic Process (GO:0001573)	1/16	0.287016	0.546002	0	0	3.129601990049751	3.9064183320167127	CLN6
Protein Import Into Mitochondrial Matrix (GO:0030150)	1/16	0.287016	0.546002	0	0	3.129601990049751	3.9064183320167127	TIMM44
Mitochondrial Fusion (GO:0008053)	1/16	0.287016	0.546002	0	0	3.129601990049751	3.9064183320167127	GDAP1
Regulation of Anoikis (GO:2000209)	1/16	0.287016	0.546002	0	0	3.129601990049751	3.9064183320167127	MYBBP1A
Negative Regulation of Rho Protein Signal Transduction (GO:0035024)	1/16	0.287016	0.546002	0	0	3.129601990049751	3.9064183320167127	SLTM
Regulation of Phosphorylation (GO:0042325)	2/51	0.288923	0.54737	0	0	1.918061606665138	2.3814581976638167	LYN;MCM7
Regulation of Type I Interferon Production (GO:0032479)	2/51	0.288923	0.54737	0	0	1.918061606665138	2.3814581976638167	DHX33;UFD1
Cellular Response to Hormone Stimulus (GO:0032870)	2/51	0.288923	0.54737	0	0	1.918061606665138	2.3814581976638167	HSPA8;NR3C1
Cellular Response to Insulin Stimulus (GO:0032869)	3/90	0.290898	0.549606	0	0	1.6215970961887478	2.0023205139622284	TBC1D4;STXBP4;SLC27A4
Intracellular Calcium Ion Homeostasis (GO:0006874)	3/90	0.290898	0.549606	0	0	1.6215970961887478	2.0023205139622284	LETM1;ATP13A1;MCUB
Protein-Containing Complex Assembly (GO:0065003)	7/258	0.295483	0.557507	0	0	1.3140567500988414	1.602025980349028	CCT2;CDC123;DHX9;ARL6;TCP1;GEMIN5;PDE4DIP
DNA Modification (GO:0006304)	1/17	0.301943	0.557526	0	0	2.933768656716418	3.513236978463212	UNG
Regulation of Microtubule Nucleation (GO:0010968)	1/17	0.301943	0.557526	0	0	2.933768656716418	3.513236978463212	PDE4DIP
Nitric Oxide Metabolic Process (GO:0046209)	1/17	0.301943	0.557526	0	0	2.933768656716418	3.513236978463212	DDAH1
Nucleosome Disassembly (GO:0006337)	1/17	0.301943	0.557526	0	0	2.933768656716418	3.513236978463212	GRWD1
Chaperone-Mediated Protein Complex Assembly (GO:0051131)	1/17	0.301943	0.557526	0	0	2.933768656716418	3.513236978463212	CCT2
Response to Glucocorticoid (GO:0051384)	1/17	0.301943	0.557526	0	0	2.933768656716418	3.513236978463212	NR3C1
Positive Regulation of Amyloid Precursor Protein Catabolic Process (GO:1902993)	1/17	0.301943	0.557526	0	0	2.933768656716418	3.513236978463212	LYN
Positive Regulation of Cell Cycle Phase Transition (GO:1901989)	1/17	0.301943	0.557526	0	0	2.933768656716418	3.513236978463212	STXBP4
Positive Regulation of mRNA Splicing, via Spliceosome (GO:0048026)	1/17	0.301943	0.557526	0	0	2.933768656716418	3.513236978463212	NCBP1
Positive Regulation of Mononuclear Cell Migration (GO:0071677)	1/17	0.301943	0.557526	0	0	2.933768656716418	3.513236978463212	C1QBP
Positive Regulation of Neutrophil Migration (GO:1902624)	1/17	0.301943	0.557526	0	0	2.933768656716418	3.513236978463212	C1QBP
Intermediate Filament Organization (GO:0045109)	1/17	0.301943	0.557526	0	0	2.933768656716418	3.513236978463212	VIM
Purine Nucleotide Biosynthetic Process (GO:0006164)	1/17	0.301943	0.557526	0	0	2.933768656716418	3.513236978463212	MTHFD1
Purine Ribonucleotide Transport (GO:0015868)	1/17	0.301943	0.557526	0	0	2.933768656716418	3.513236978463212	SLC25A17
Regulation of Amyloid Precursor Protein Catabolic Process (GO:1902991)	1/17	0.301943	0.557526	0	0	2.933768656716418	3.513236978463212	LYN
Negative Regulation of DNA-templated Transcription, Elongation (GO:0032785)	1/17	0.301943	0.557526	0	0	2.933768656716418	3.513236978463212	WDR82
Negative Regulation of Catabolic Process (GO:0009895)	3/92	0.302346	0.557526	0	0	1.5849032694094787	1.8958337277773005	SF3B3;SLTM;EIF4E
Negative Regulation of Immune Response (GO:0050777)	2/53	0.304446	0.559905	0	0	1.8425497539839906	2.1912737251808068	LYN;DDX39A
Negative Regulation of Autophagy (GO:0010507)	2/53	0.304446	0.559905	0	0	1.8425497539839906	2.1912737251808068	SLTM;EIF4E
Regulation of Primary Metabolic Process (GO:0080090)	3/93	0.308079	0.562725	0	0	1.5671679197994988	1.8451816704877688	PTBP1;SF3B3;HNRNPF
Positive Regulation of Response to External Stimulus (GO:0032103)	3/93	0.308079	0.562725	0	0	1.5671679197994988	1.8451816704877688	DHX9;POLR3G;ETS1
Microtubule Cytoskeleton Organization Involved in Mitosis (GO:1902850)	2/54	0.312186	0.562725	0	0	1.8069720541630654	2.103599369411122	ESPL1;WDR62
Fc-gamma Receptor Signaling Pathway (GO:0038094)	1/18	0.316558	0.562725	0	0	2.760974539069359	3.175804447850317	LYN
GPCR Sgnlng Pway, Coupled to Cyclic Nucleotide Second Messenger (GO:0007187)	1/18	0.316558	0.562725	0	0	2.760974539069359	3.175804447850317	LPAR3
Adenine Nucleotide Transport (GO:0051503)	1/18	0.316558	0.562725	0	0	2.760974539069359	3.175804447850317	SLC25A17
Negative Regulation of Response to Wounding (GO:1903035)	1/18	0.316558	0.562725	0	0	2.760974539069359	3.175804447850317	CRK
Negative Regulation of Transferase Activity (GO:0051348)	1/18	0.316558	0.562725	0	0	2.760974539069359	3.175804447850317	PRDX3
Regulation of Platelet Activation (GO:0010543)	1/18	0.316558	0.562725	0	0	2.760974539069359	3.175804447850317	LYN
Regulation of Postsynaptic Membrane Potential (GO:0060078)	1/18	0.316558	0.562725	0	0	2.760974539069359	3.175804447850317	SLTM
Non-Canonical NF-kappaB Signal Transduction (GO:0038061)	1/18	0.316558	0.562725	0	0	2.760974539069359	3.175804447850317	CHUK
Nucleic Acid Metabolic Process (GO:0090304)	1/18	0.316558	0.562725	0	0	2.760974539069359	3.175804447850317	XRN2
Carbohydrate Biosynthetic Process (GO:0016051)	1/18	0.316558	0.562725	0	0	2.760974539069359	3.175804447850317	DDX18
Phospholipid Catabolic Process (GO:0009395)	1/18	0.316558	0.562725	0	0	2.760974539069359	3.175804447850317	SMPD4
Pore Complex Assembly (GO:0046931)	1/18	0.316558	0.562725	0	0	2.760974539069359	3.175804447850317	NUP205
Chemical Synaptic Transmission, Postsynaptic (GO:0099565)	1/18	0.316558	0.562725	0	0	2.760974539069359	3.175804447850317	SLTM
Chromosome Condensation (GO:0030261)	1/18	0.316558	0.562725	0	0	2.760974539069359	3.175804447850317	NCAPD3
Retrograde Protein Transport, ER to Cytosol (GO:0030970)	1/18	0.316558	0.562725	0	0	2.760974539069359	3.175804447850317	UFD1
Positive Regulation of Dendritic Spine Development (GO:0060999)	1/18	0.316558	0.562725	0	0	2.760974539069359	3.175804447850317	LLPH
Endothelial Cell Development (GO:0001885)	1/18	0.316558	0.562725	0	0	2.760974539069359	3.175804447850317	SLTM
Positive Regulation of Lamellipodium Assembly (GO:0010592)	1/18	0.316558	0.562725	0	0	2.760974539069359	3.175804447850317	ACTR3
Hepaticobiliary System Development (GO:0061008)	1/18	0.316558	0.562725	0	0	2.760974539069359	3.175804447850317	SLTM
Protein Heterooligomerization (GO:0051291)	1/18	0.316558	0.562725	0	0	2.760974539069359	3.175804447850317	FARSB
Protein Localization to Microtubule Organizing Center (GO:1905508)	1/18	0.316558	0.562725	0	0	2.760974539069359	3.175804447850317	C2CD3
rRNA Methylation (GO:0031167)	1/18	0.316558	0.562725	0	0	2.760974539069359	3.175804447850317	EMG1
Regulation of Cholesterol Transport (GO:0032374)	1/18	0.316558	0.562725	0	0	2.760974539069359	3.175804447850317	NUS1
Regulation of Insulin Secretion (GO:0050796)	2/55	0.319907	0.566494	0	0	1.7727369090523637	2.020432019000774	BRSK2;STXBP4
Positive Regulation of Protein Polymerization (GO:0032273)	2/55	0.319907	0.566494	0	0	1.7727369090523637	2.020432019000774	NAV3;SLTM
Protein Targeting to Membrane (GO:0006612)	2/55	0.319907	0.566494	0	0	1.7727369090523637	2.020432019000774	SEC61A1;ARL6
Recombinational Repair (GO:0000725)	3/96	0.325296	0.570563	0	0	1.516250303177298	1.7027781547348433	FEN1;POLR1B;UBE2N
Post-Transcriptional Regulation of Gene Expression (GO:0010608)	2/56	0.327608	0.570563	0	0	1.7397697322790955	1.9414766841329125	GEMIN5;EIF4E
Fc-epsilon Receptor Signaling Pathway (GO:0038095)	1/19	0.330869	0.570563	0	0	2.607379767827529	2.88384937993226	LYN
Negative Regulation of Oxidative Stress-Induced Intrinsic Apoptotic Signaling Pathway (GO:1902176)	1/19	0.330869	0.570563	0	0	2.607379767827529	2.88384937993226	ATF4
Regulation of Macrophage Activation (GO:0043030)	1/19	0.330869	0.570563	0	0	2.607379767827529	2.88384937993226	MCUB
Reg of Mt Outer Membrane Permeabilization Inv in Apoptotic Sgnlng Pway (GO:1901028)	1/19	0.330869	0.570563	0	0	2.607379767827529	2.88384937993226	SIVA1
Amino Acid Import Across Plasma Membrane (GO:0089718)	1/19	0.330869	0.570563	0	0	2.607379767827529	2.88384937993226	SLC38A5
Regulation of Nuclear-Transcribed mRNA Catabolic Process, Deadenylation-Dependent Decay (GO:1900151)	1/19	0.330869	0.570563	0	0	2.607379767827529	2.88384937993226	DHX9
Negative Regulation of Wound Healing (GO:0061045)	1/19	0.330869	0.570563	0	0	2.607379767827529	2.88384937993226	CRK
Nuclear Receptor-Mediated Signaling Pathway (GO:0141193)	1/19	0.330869	0.570563	0	0	2.607379767827529	2.88384937993226	NR3C1
Regulation of Protein Neddylation (GO:2000434)	1/19	0.330869	0.570563	0	0	2.607379767827529	2.88384937993226	COPS3
Regulation of Ruffle Assembly (GO:1900027)	1/19	0.330869	0.570563	0	0	2.607379767827529	2.88384937993226	FAM98A
Cellular Response to Xenobiotic Stimulus (GO:0071466)	1/19	0.330869	0.570563	0	0	2.607379767827529	2.88384937993226	TFRC
Positive Regulation of G2/M Transition of Mitotic Cell Cycle (GO:0010971)	1/19	0.330869	0.570563	0	0	2.607379767827529	2.88384937993226	DTL
snRNA 3'-End Processing (GO:0034472)	1/19	0.330869	0.570563	0	0	2.607379767827529	2.88384937993226	EXOSC9
Endoplasmic Reticulum Calcium Ion Homeostasis (GO:0032469)	1/19	0.330869	0.570563	0	0	2.607379767827529	2.88384937993226	THADA
Positive Regulation of Fibroblast Proliferation (GO:0048146)	1/19	0.330869	0.570563	0	0	2.607379767827529	2.88384937993226	DHX9
Entrainment of Circadian Clock by Photoperiod (GO:0043153)	1/19	0.330869	0.570563	0	0	2.607379767827529	2.88384937993226	PPP1CC
Protein Neddylation (GO:0045116)	1/19	0.330869	0.570563	0	0	2.607379767827529	2.88384937993226	COPS3
protein-DNA Complex Disassembly (GO:0032986)	1/19	0.330869	0.570563	0	0	2.607379767827529	2.88384937993226	GRWD1
Regulation of B Cell Proliferation (GO:0030888)	1/19	0.330869	0.570563	0	0	2.607379767827529	2.88384937993226	TFRC
Lipid Biosynthetic Process (GO:0008610)	2/57	0.335285	0.57674	0	0	1.7080013619339462	1.8664621716687497	B3GALT1;SELENOI
Protein Targeting to Mitochondrion (GO:0006626)	2/57	0.335285	0.57674	0	0	1.7080013619339462	1.8664621716687497	TIMM44;GDAP1
Regulation of Programmed Cell Death (GO:0043067)	4/140	0.336189	0.577578	0	0	1.3829078801331853	1.5074809340496802	DPP9;IFT57;ETS1;NME1
Positive Regulation of DNA Metabolic Process (GO:0051054)	3/98	0.336777	0.577868	0	0	1.4840918084685397	1.6151901202590548	PCNA;DHX9;UBE2N
Cellular Response to Tumor Necrosis Factor (GO:0071356)	2/58	0.342936	0.578847	0	0	1.6773675762439808	1.7951387989404324	SMPD4;CHUK
Negative Regulation of Intrinsic Apoptotic Signaling Pathway in Response to DNA Damage (GO:1902230)	1/20	0.344881	0.578847	0	0	2.4699528672427338	2.6294057447313377	DDIAS
Negative Regulation of Small Molecule Metabolic Process (GO:0062014)	1/20	0.344881	0.578847	0	0	2.4699528672427338	2.6294057447313377	PGP
Regulation of Muscle Cell Differentiation (GO:0051147)	1/20	0.344881	0.578847	0	0	2.4699528672427338	2.6294057447313377	PTBP1
Negative Regulation of Stress Fiber Assembly (GO:0051497)	1/20	0.344881	0.578847	0	0	2.4699528672427338	2.6294057447313377	SLTM
Regulation of Platelet Aggregation (GO:0090330)	1/20	0.344881	0.578847	0	0	2.4699528672427338	2.6294057447313377	LYN
Regulation of Protein Transport (GO:0051223)	1/20	0.344881	0.578847	0	0	2.4699528672427338	2.6294057447313377	HSPA8
Nucleotide-Sugar Biosynthetic Process (GO:0009226)	1/20	0.344881	0.578847	0	0	2.4699528672427338	2.6294057447313377	UXS1
Organelle Fission (GO:0048285)	1/20	0.344881	0.578847	0	0	2.4699528672427338	2.6294057447313377	GDAP1
Photoperiodism (GO:0009648)	1/20	0.344881	0.578847	0	0	2.4699528672427338	2.6294057447313377	PPP1CC
Dolichol-Linked Oligosaccharide Biosynthetic Process (GO:0006488)	1/20	0.344881	0.578847	0	0	2.4699528672427338	2.6294057447313377	NUS1
Positive Regulation of mRNA Processing (GO:0050685)	1/20	0.344881	0.578847	0	0	2.4699528672427338	2.6294057447313377	NCBP1
Hexose Biosynthetic Process (GO:0019319)	1/20	0.344881	0.578847	0	0	2.4699528672427338	2.6294057447313377	ATF4
Positive Regulation of Vacuole Organization (GO:0044090)	1/20	0.344881	0.578847	0	0	2.4699528672427338	2.6294057447313377	WDR45
Post-Transcriptional Gene Silencing (GO:0016441)	1/20	0.344881	0.578847	0	0	2.4699528672427338	2.6294057447313377	NCBP1
Lamellipodium Assembly (GO:0030032)	1/20	0.344881	0.578847	0	0	2.4699528672427338	2.6294057447313377	SPATA13
Protein Localization to Centrosome (GO:0071539)	1/20	0.344881	0.578847	0	0	2.4699528672427338	2.6294057447313377	C2CD3
Microtubule Polymerization or Depolymerization (GO:0031109)	1/20	0.344881	0.578847	0	0	2.4699528672427338	2.6294057447313377	KATNB1
Positive Regulation of Macromolecule Biosynthetic Process (GO:0010557)	6/229	0.346167	0.580302	0	0	1.2658016334464355	1.3428043682567865	DNMT1;HSPH1;TFRC;FAM98A;ETS1;ATF4
Regulation of Neuron Projection Development (GO:0010975)	4/143	0.350465	0.584124	0	0	1.3527351703542827	1.4183370483481628	LYN;BRSK2;YTHDF1;KIF26A
Positive Regulation of Biosynthetic Process (GO:0009891)	2/59	0.350559	0.584124	0	0	1.6478086602273474	1.7272763623656129	DDAH1;VIM
Positive Regulation of Intracellular Protein Transport (GO:0090316)	2/59	0.350559	0.584124	0	0	1.6478086602273474	1.7272763623656129	ICE1;IPO5
Protein-Containing Complex Disassembly (GO:0032984)	2/59	0.350559	0.584124	0	0	1.6478086602273474	1.7272763623656129	HSPA8;ETF1
Negative Regulation of Cell Cycle (GO:0045786)	2/59	0.350559	0.584124	0	0	1.6478086602273474	1.7272763623656129	ETS1;IPO5
Negative Regulation of Response to External Stimulus (GO:0032102)	3/101	0.353975	0.584151	0	0	1.438315175694338	1.4937308143251105	DDX39A;C1QBP;CRK
Positive Regulation of Cell Population Proliferation (GO:0008284)	8/321	0.357394	0.584151	0	0	1.2028447969838296	1.2376273006904805	PRDX3;LYN;TIPIN;DHX9;GID8;RBPMS2;FAM98A;NME1
Negative Regulation of Apoptotic Signaling Pathway (GO:2001234)	2/60	0.358152	0.584151	0	0	1.619269017176805	1.6626623272155923	PRELID1;PSME3
RNA Destabilization (GO:0050779)	1/21	0.3586	0.584151	0	0	2.346268656716418	2.4062099869559574	YTHDF1
Regulation of Kinase Activity (GO:0043549)	1/21	0.3586	0.584151	0	0	2.346268656716418	2.4062099869559574	PRDX3
Regulation of Long-Term Synaptic Potentiation (GO:1900271)	1/21	0.3586	0.584151	0	0	2.346268656716418	2.4062099869559574	YTHDF1
Negative Regulation of Protein Localization to Nucleus (GO:1900181)	1/21	0.3586	0.584151	0	0	2.346268656716418	2.4062099869559574	YWHAB
Actin Filament Polymerization (GO:0030041)	1/21	0.3586	0.584151	0	0	2.346268656716418	2.4062099869559574	DIAPH1
Negative Regulation of Signaling (GO:0023057)	1/21	0.3586	0.584151	0	0	2.346268656716418	2.4062099869559574	KIF26A
Regulation of Toll-Like Receptor 4 Signaling Pathway (GO:0034143)	1/21	0.3586	0.584151	0	0	2.346268656716418	2.4062099869559574	LYN
Phospholipid Biosynthetic Process (GO:0008654)	1/21	0.3586	0.584151	0	0	2.346268656716418	2.4062099869559574	NUS1
Positive Regulation of Immunoglobulin Production (GO:0002639)	1/21	0.3586	0.584151	0	0	2.346268656716418	2.4062099869559574	TFRC
Epithelial Tube Morphogenesis (GO:0060562)	1/21	0.3586	0.584151	0	0	2.346268656716418	2.4062099869559574	SLTM
Positive Regulation of Mitotic Nuclear Division (GO:0045840)	1/21	0.3586	0.584151	0	0	2.346268656716418	2.4062099869559574	ESPL1
Positive Regulation of Reproductive Process (GO:2000243)	1/21	0.3586	0.584151	0	0	2.346268656716418	2.4062099869559574	C1QBP
Iron-Sulfur Cluster Assembly (GO:0016226)	1/21	0.3586	0.584151	0	0	2.346268656716418	2.4062099869559574	HSPA9
Metallo-Sulfur Cluster Assembly (GO:0031163)	1/21	0.3586	0.584151	0	0	2.346268656716418	2.4062099869559574	HSPA9
Purine-Containing Compound Biosynthetic Process (GO:0072522)	1/21	0.3586	0.584151	0	0	2.346268656716418	2.4062099869559574	MTHFD1
Regulation of Cell-Substrate Junction Assembly (GO:0090109)	1/21	0.3586	0.584151	0	0	2.346268656716418	2.4062099869559574	GPM6B
DNA Repair (GO:0006281)	7/277	0.359542	0.584997	0	0	1.2197059655074922	1.2476653310715708	FEN1;PCNA;POLR1B;PSME4;UBE2N;MLH1;UNG
Regulation of Protein-Containing Complex Assembly (GO:0043254)	3/103	0.365413	0.592085	0	0	1.4093233082706766	1.41880469708279	HSPA8;ICE1;TFRC
Positive Regulation of Inflammatory Response (GO:0050729)	2/61	0.365712	0.592085	0	0	1.5916968196533994	1.6011002134674543	DHX9;ETS1
Regulation of Rho Protein Signal Transduction (GO:0035023)	2/61	0.365712	0.592085	0	0	1.5916968196533994	1.6011002134674543	SLTM;ARHGDIA
Negative Regulation of Gene Expression (GO:0010629)	7/279	0.366381	0.592085	0	0	1.210541086663673	1.2154813538904436	PTBP1;YTHDF1;DNMT1;PNPT1;IFRD2;EXOSC9;PPM1D
Fc Receptor Signaling Pathway (GO:0038093)	1/22	0.372033	0.592085	0	0	2.234363894811656	2.209276298556069	LYN
GPI Anchor Biosynthetic Process (GO:0006506)	1/22	0.372033	0.592085	0	0	2.234363894811656	2.209276298556069	PGAP2
GPI Anchor Metabolic Process (GO:0006505)	1/22	0.372033	0.592085	0	0	2.234363894811656	2.209276298556069	PGAP2
L-amino Acid Transport (GO:0015807)	1/22	0.372033	0.592085	0	0	2.234363894811656	2.209276298556069	SLC38A5
Nucleophagy (GO:0044804)	1/22	0.372033	0.592085	0	0	2.234363894811656	2.209276298556069	WDR45
Organelle Fusion (GO:0048284)	1/22	0.372033	0.592085	0	0	2.234363894811656	2.209276298556069	GDAP1
Organophosphate Ester Transport (GO:0015748)	1/22	0.372033	0.592085	0	0	2.234363894811656	2.209276298556069	PRELID1
Positive Regulation of Cell Cycle G2/M Phase Transition (GO:1902751)	1/22	0.372033	0.592085	0	0	2.234363894811656	2.209276298556069	DTL
Positive Regulation of Mitotic Cell Cycle (GO:0045931)	1/22	0.372033	0.592085	0	0	2.234363894811656	2.209276298556069	EIF4E
Histone mRNA Metabolic Process (GO:0008334)	1/22	0.372033	0.592085	0	0	2.234363894811656	2.209276298556069	NCBP1
Intracellular Protein Transmembrane Transport (GO:0065002)	1/22	0.372033	0.592085	0	0	2.234363894811656	2.209276298556069	SEC61A1
Protein Targeting to Lysosome (GO:0006622)	1/22	0.372033	0.592085	0	0	2.234363894811656	2.209276298556069	HSPA8
Negative Regulation of Actin Filament Bundle Assembly (GO:0032232)	1/22	0.372033	0.592085	0	0	2.234363894811656	2.209276298556069	SLTM
Regulation of Calcium Ion Transmembrane Transport (GO:1903169)	1/22	0.372033	0.592085	0	0	2.234363894811656	2.209276298556069	DIAPH1
Regulation of Chemotaxis (GO:0050920)	1/22	0.372033	0.592085	0	0	2.234363894811656	2.209276298556069	YTHDF1
Cellular Response to Oxidative Stress (GO:0034599)	3/105	0.376817	0.598322	0	0	1.381468376824414	1.3483067658001018	PRDX3;PNPT1;ATF4
Regulation of Anatomical Structure Morphogenesis (GO:0022603)	3/105	0.376817	0.598322	0	0	1.381468376824414	1.3483067658001018	BRSK2;HECW1;ETS1
Calcium Ion Transmembrane Transport (GO:0070588)	2/63	0.380729	0.601935	0	0	1.53926444403512	1.4864175882983377	LETM1;MCUB
Regulation of Tumor Necrosis Factor Production (GO:0032680)	2/63	0.380729	0.601935	0	0	1.53926444403512	1.4864175882983377	DHX9;TNFRSF8
Negative Regulation of Cytokine Production (GO:0001818)	3/106	0.382504	0.601935	0	0	1.367946565442733	1.314618444698418	NAV3;C1QBP;UFD1
Negative Regulation of Double-Strand Break Repair via Homologous Recombination (GO:2000042)	1/23	0.385186	0.601935	0	0	2.132632293080054	2.034591839558561	C1QBP
Negative Regulation of Hippo Signaling (GO:0035331)	1/23	0.385186	0.601935	0	0	2.132632293080054	2.034591839558561	WWC3
Regulation of Proteolysis Involved in Protein Catabolic Process (GO:1903050)	1/23	0.385186	0.601935	0	0	2.132632293080054	2.034591839558561	PSME3
Positive Regulation of Erythrocyte Differentiation (GO:0045648)	1/23	0.385186	0.601935	0	0	2.132632293080054	2.034591839558561	ETS1
Transition Metal Ion Transport (GO:0000041)	1/23	0.385186	0.601935	0	0	2.132632293080054	2.034591839558561	TFRC
Translesion Synthesis (GO:0019985)	1/23	0.385186	0.601935	0	0	2.132632293080054	2.034591839558561	PCNA
Protein Depolymerization (GO:0051261)	1/23	0.385186	0.601935	0	0	2.132632293080054	2.034591839558561	KATNB1
Membrane Fusion (GO:0061025)	1/23	0.385186	0.601935	0	0	2.132632293080054	2.034591839558561	USO1
Protein Targeting to ER (GO:0045047)	1/23	0.385186	0.601935	0	0	2.132632293080054	2.034591839558561	SEC61A1
Regulation of calcineurin-NFAT Signaling Cascade (GO:0070884)	1/23	0.385186	0.601935	0	0	2.132632293080054	2.034591839558561	PTBP1
Negative Regulation of Carbohydrate Metabolic Process (GO:0045912)	1/23	0.385186	0.601935	0	0	2.132632293080054	2.034591839558561	PGP
Regulation of Protein Catabolic Process (GO:0042176)	3/107	0.38818	0.605928	0	0	1.3546847888953153	1.2819207676620972	SF3B3;PSME3;DTL
Positive Regulation of Gene Expression (GO:0010628)	7/288	0.397243	0.611014	0	0	1.1709135856129962	1.0809946295344863	YTHDF1;DNMT1;TFRC;U2AF2;FAM98A;ETS1;ATF4
Regulation of Cytoplasmic Translation (GO:2000765)	1/24	0.398065	0.611014	0	0	2.0397469175859833	1.8788943946576453	DHX9
Regulation of Interleukin-12 Production (GO:0032655)	1/24	0.398065	0.611014	0	0	2.0397469175859833	1.8788943946576453	C1QBP
Branching Morphogenesis of an Epithelial Tube (GO:0048754)	1/24	0.398065	0.611014	0	0	2.0397469175859833	1.8788943946576453	SLTM
Organic Hydroxy Compound Transport (GO:0015850)	1/24	0.398065	0.611014	0	0	2.0397469175859833	1.8788943946576453	SLC22A3
Cellular Response to Retinoic Acid (GO:0071300)	1/24	0.398065	0.611014	0	0	2.0397469175859833	1.8788943946576453	LYN
Cellular Response to Topologically Incorrect Protein (GO:0035967)	1/24	0.398065	0.611014	0	0	2.0397469175859833	1.8788943946576453	UFD1
Sphingolipid Catabolic Process (GO:0030149)	1/24	0.398065	0.611014	0	0	2.0397469175859833	1.8788943946576453	SMPD4
Positive Regulation of Establishment of Protein Localization (GO:1904951)	1/24	0.398065	0.611014	0	0	2.0397469175859833	1.8788943946576453	TCP1
Intracellular pH Reduction (GO:0051452)	1/24	0.398065	0.611014	0	0	2.0397469175859833	1.8788943946576453	ATP6V0B
Protein Acetylation (GO:0006473)	1/24	0.398065	0.611014	0	0	2.0397469175859833	1.8788943946576453	NAA15
Protein Exit From Endoplasmic Reticulum (GO:0032527)	1/24	0.398065	0.611014	0	0	2.0397469175859833	1.8788943946576453	UFD1
Regulation of DNA Recombination (GO:0000018)	1/24	0.398065	0.611014	0	0	2.0397469175859833	1.8788943946576453	POLR1B
Negative Regulation of DNA Metabolic Process (GO:0051053)	1/24	0.398065	0.611014	0	0	2.0397469175859833	1.8788943946576453	CDC6
Regulation of Cell Adhesion Mediated by Integrin (GO:0033628)	1/24	0.398065	0.611014	0	0	2.0397469175859833	1.8788943946576453	LYN
Cellular Response to Lipopolysaccharide (GO:0071222)	2/66	0.402965	0.617166	0	0	1.466760299625468	1.3331455555297334	LYN;VIM
Monoatomic Ion Transport (GO:0006811)	2/66	0.402965	0.617166	0	0	1.466760299625468	1.3331455555297334	SLC20A2;SLC20A1
Positive Regulation of Canonical NF-kappaB Signal Transduction (GO:0043123)	4/155	0.407444	0.61948	0	0	1.2440334874422092	1.1169570972398317	TFRC;CHUK;SLC20A1;UBE2N
Regulation of Cell Cycle G1/S Phase Transition (GO:1902806)	2/67	0.410294	0.61948	0	0	1.4440795159896282	1.2865035472314301	STXBP4;PSME3
Regulation of Lamellipodium Assembly (GO:0010591)	1/25	0.410674	0.61948	0	0	1.9546019900497513	1.7395077389812899	ACTR3
Regulation of Supramolecular Fiber Organization (GO:1902903)	1/25	0.410674	0.61948	0	0	1.9546019900497513	1.7395077389812899	HSPA8
Cellular Response to Acid Chemical (GO:0071229)	1/25	0.410674	0.61948	0	0	1.9546019900497513	1.7395077389812899	IPO5
Cytoplasmic Pattern Recognition Receptor Signaling Pathway (GO:0002753)	1/25	0.410674	0.61948	0	0	1.9546019900497513	1.7395077389812899	IPO5
Positive Regulation of Cell Division (GO:0051781)	1/25	0.410674	0.61948	0	0	1.9546019900497513	1.7395077389812899	CDC6
Stress Granule Assembly (GO:0034063)	1/25	0.410674	0.61948	0	0	1.9546019900497513	1.7395077389812899	YTHDF1
Tumor Necrosis Factor-Mediated Signaling Pathway (GO:0033209)	1/25	0.410674	0.61948	0	0	1.9546019900497513	1.7395077389812899	CHUK
Lamellipodium Organization (GO:0097581)	1/25	0.410674	0.61948	0	0	1.9546019900497513	1.7395077389812899	SPATA13
Liver Development (GO:0001889)	1/25	0.410674	0.61948	0	0	1.9546019900497513	1.7395077389812899	SLTM
Purine Ribonucleoside Triphosphate Metabolic Process (GO:0009205)	1/25	0.410674	0.61948	0	0	1.9546019900497513	1.7395077389812899	HSPA8
Negative Regulation of MAP Kinase Activity (GO:0043407)	1/25	0.410674	0.61948	0	0	1.9546019900497513	1.7395077389812899	LYN
Inflammatory Response (GO:0006954)	3/111	0.410747	0.61948	0	0	1.304093567251462	1.1603527599452341	CHUK;DHX9;DPP9
Cellular Response to UV (GO:0034644)	2/68	0.417578	0.623043	0	0	1.4220860288276018	1.241883236855273	PCNA;ATF4
Monocarboxylic Acid Metabolic Process (GO:0032787)	2/68	0.417578	0.623043	0	0	1.4220860288276018	1.241883236855273	MTHFD1L;SLC27A4
Negative Regulation of Apoptotic Process (GO:0043066)	8/341	0.421079	0.623043	0	0	1.1287609448528988	0.9763042009737769	PRDX3;HSPA9;SUPV3L1;PRELID1;TFRC;ARHGDIA;BAG1;NAA15
Intracellular Protein Transport (GO:0006886)	7/295	0.421258	0.623043	0	0	1.1418044953350297	0.9871015725636232	HSPA9;ARL6;XPO6;USO1;NUTF2;TIMM44;IPO5
Neuron Differentiation (GO:0030182)	3/113	0.421937	0.623043	0	0	1.2801777170198223	1.1046634974308993	BRSK2;SLTM;ANOS1
ER-nucleus Signaling Pathway (GO:0006984)	1/26	0.423021	0.623043	0	0	1.876268656716418	1.61421806649387	ATF4
GPI Anchored Protein Biosynthesis (GO:0180046)	1/26	0.423021	0.623043	0	0	1.876268656716418	1.61421806649387	PGAP2
Regulation of Interleukin-2 Production (GO:0032663)	1/26	0.423021	0.623043	0	0	1.876268656716418	1.61421806649387	NAV3
Activation of GTPase Activity (GO:0090630)	1/26	0.423021	0.623043	0	0	1.876268656716418	1.61421806649387	SLC27A4
Regulation of Neuron Migration (GO:2001222)	1/26	0.423021	0.623043	0	0	1.876268656716418	1.61421806649387	KIF26A
Regulation of Nitric Oxide Biosynthetic Process (GO:0045428)	1/26	0.423021	0.623043	0	0	1.876268656716418	1.61421806649387	DDAH1
Neutral Amino Acid Transport (GO:0015804)	1/26	0.423021	0.623043	0	0	1.876268656716418	1.61421806649387	SLC38A5
Regulation of Vascular Associated Smooth Muscle Cell Proliferation (GO:1904705)	1/26	0.423021	0.623043	0	0	1.876268656716418	1.61421806649387	DNMT1
Rescue of Stalled Ribosome (GO:0072344)	1/26	0.423021	0.623043	0	0	1.876268656716418	1.61421806649387	ZNF598
Response to Amino Acid (GO:0043200)	1/26	0.423021	0.623043	0	0	1.876268656716418	1.61421806649387	IPO5
Cellular Response to Virus (GO:0098586)	1/26	0.423021	0.623043	0	0	1.876268656716418	1.61421806649387	CHUK
Positive Regulation of T Cell Proliferation (GO:0042102)	1/26	0.423021	0.623043	0	0	1.876268656716418	1.61421806649387	TFRC
Response to Transforming Growth Factor Beta (GO:0071559)	1/26	0.423021	0.623043	0	0	1.876268656716418	1.61421806649387	NR3C1
Positive Regulation of Cytokinesis (GO:0032467)	1/26	0.423021	0.623043	0	0	1.876268656716418	1.61421806649387	CDC6
Positive Regulation of Lamellipodium Organization (GO:1902745)	1/26	0.423021	0.623043	0	0	1.876268656716418	1.61421806649387	ACTR3
Transcription Elongation by RNA Polymerase II (GO:0006368)	1/26	0.423021	0.623043	0	0	1.876268656716418	1.61421806649387	USP15
Positive Regulation of Protein Import Into Nucleus (GO:0042307)	1/26	0.423021	0.623043	0	0	1.876268656716418	1.61421806649387	IPO5
Import Into Nucleus (GO:0051170)	2/69	0.424817	0.62436	0	0	1.400749063670412	1.1991752650554812	NUTF2;IPO5
Protein Import Into Nucleus (GO:0006606)	2/69	0.424817	0.62436	0	0	1.400749063670412	1.1991752650554812	NUTF2;IPO5
Regulation of Dendrite Morphogenesis (GO:0048814)	1/27	0.435109	0.631434	0	0	1.8039609644087256	1.5011800959356993	HECW1
Amino Acid Transport (GO:0006865)	1/27	0.435109	0.631434	0	0	1.8039609644087256	1.5011800959356993	SLC38A5
Regulation of Protein Modification by Small Protein Conjugation or Removal (GO:1903320)	1/27	0.435109	0.631434	0	0	1.8039609644087256	1.5011800959356993	COPS3
Regulation of Protein Modification Process (GO:0031399)	1/27	0.435109	0.631434	0	0	1.8039609644087256	1.5011800959356993	LYN
Regulation of Vasculature Development (GO:1901342)	1/27	0.435109	0.631434	0	0	1.8039609644087256	1.5011800959356993	ETS1
Release of Sequestered Calcium Ion Into Cytosol (GO:0051209)	1/27	0.435109	0.631434	0	0	1.8039609644087256	1.5011800959356993	LETM1
Constitutive Heterochromatin Formation (GO:0140719)	1/27	0.435109	0.631434	0	0	1.8039609644087256	1.5011800959356993	PPM1D
Intracellular Receptor Signaling Pathway (GO:0030522)	1/27	0.435109	0.631434	0	0	1.8039609644087256	1.5011800959356993	IPO5
mRNA 3'-End Processing (GO:0031124)	1/27	0.435109	0.631434	0	0	1.8039609644087256	1.5011800959356993	NCBP1
mRNA Splice Site Recognition (GO:0006376)	1/27	0.435109	0.631434	0	0	1.8039609644087256	1.5011800959356993	PUF60
Mononuclear Cell Differentiation (GO:1903131)	1/27	0.435109	0.631434	0	0	1.8039609644087256	1.5011800959356993	LYN
Regulation of Cellular Senescence (GO:2000772)	1/27	0.435109	0.631434	0	0	1.8039609644087256	1.5011800959356993	PNPT1
Regulation of Signal Transduction (GO:0009966)	4/161	0.435615	0.631504	0	0	1.1959139526499218	0.9938007600683159	KIF26A;TMEM237;PPM1D;CRK
Regulation of Cytoskeleton Organization (GO:0051493)	3/116	0.438586	0.635145	0	0	1.2458912768647281	1.0268640072778072	DIAPH1;CRK;GPM6B
Negative Regulation of Signal Transduction (GO:0009968)	5/209	0.444372	0.639882	0	0	1.1504753416518123	0.9331416561238407	LYN;WIF1;KIF26A;YWHAB;SLC27A4
Regulation of Double-Strand Break Repair via Homologous Recombination (GO:0010569)	2/72	0.446249	0.639882	0	0	1.3403959336543607	1.0815370021319877	C1QBP;POLR1B
Positive Regulation of Plasma Membrane Bounded Cell Projection Assembly (GO:0120034)	2/72	0.446249	0.639882	0	0	1.3403959336543607	1.0815370021319877	ACTR3;FAM98A
Negative Regulation of Developmental Growth (GO:0048640)	1/28	0.446946	0.639882	0	0	1.7370093974571585	1.3988449101571112	WWC3
Regulation of Gluconeogenesis (GO:0006111)	1/28	0.446946	0.639882	0	0	1.7370093974571585	1.3988449101571112	PGP
Regulation of Protein Localization to Cell Surface (GO:2000008)	1/28	0.446946	0.639882	0	0	1.7370093974571585	1.3988449101571112	GPM6B
Canonical NF-kappaB Signal Transduction (GO:0007249)	1/28	0.446946	0.639882	0	0	1.7370093974571585	1.3988449101571112	CHUK
Response to Hydrogen Peroxide (GO:0042542)	1/28	0.446946	0.639882	0	0	1.7370093974571585	1.3988449101571112	PRDX3
Secondary Alcohol Metabolic Process (GO:1902652)	1/28	0.446946	0.639882	0	0	1.7370093974571585	1.3988449101571112	CLN6
Positive Regulation of Myeloid Cell Differentiation (GO:0045639)	1/28	0.446946	0.639882	0	0	1.7370093974571585	1.3988449101571112	ETS1
Positive Regulation of Protein Targeting to Mitochondrion (GO:1903955)	1/28	0.446946	0.639882	0	0	1.7370093974571585	1.3988449101571112	ARIH2
Regulation of mRNA Stability (GO:0043488)	2/73	0.453293	0.648299	0	0	1.3214116157619877	1.04552132444248	YTHDF1;VIM
Positive Regulation of Protein Metabolic Process (GO:0051247)	4/165	0.454191	0.648422	0	0	1.1658267901089887	0.9201144610946831	LYN;YTHDF1;DTL;CLN6
Protein Transport (GO:0015031)	6/258	0.454318	0.648422	0	0	1.1175086003983343	0.8816682843588003	HSPA9;TFRC;ARL6;RAB34;USO1;TIMM44
Golgi to Plasma Membrane Protein Transport (GO:0043001)	1/29	0.458535	0.649083	0	0	1.6748400852878464	1.3059039212382657	RAB34
Negative Regulation of Type I Interferon Production (GO:0032480)	1/29	0.458535	0.649083	0	0	1.6748400852878464	1.3059039212382657	UFD1
Ceramide Biosynthetic Process (GO:0046513)	1/29	0.458535	0.649083	0	0	1.6748400852878464	1.3059039212382657	SMPD4
Positive Regulation of Leukocyte Cell-Cell Adhesion (GO:1903039)	1/29	0.458535	0.649083	0	0	1.6748400852878464	1.3059039212382657	ETS1
Positive Regulation of Neuron Apoptotic Process (GO:0043525)	1/29	0.458535	0.649083	0	0	1.6748400852878464	1.3059039212382657	ATF4
Positive Regulation of Transferase Activity (GO:0051347)	1/29	0.458535	0.649083	0	0	1.6748400852878464	1.3059039212382657	PCNA
Lytic Vacuole Organization (GO:0080171)	1/29	0.458535	0.649083	0	0	1.6748400852878464	1.3059039212382657	CLN6
Mitotic G2 DNA Damage Checkpoint Signaling (GO:0007095)	1/29	0.458535	0.649083	0	0	1.6748400852878464	1.3059039212382657	DTL
Protein Metabolic Process (GO:0019538)	10/449	0.465008	0.649847	0	0	1.0692078345836888	0.8186935706791677	MRPL3;RPS17;MRPS15;DPP9;MRRF;CAPN15;MRPL32;CLN6;MRPL11;FARSB
Defense Response to Virus (GO:0051607)	3/121	0.465915	0.649847	0	0	1.1926213839683955	0.9108660050436302	NCBP1;NDUFAF4;UBE2N
Negative Regulation of Gene Expression, Epigenetic (GO:0045814)	2/75	0.467228	0.649847	0	0	1.2850033348725052	0.9778068769544185	DNMT1;PPM1D
Axon Development (GO:0061564)	2/75	0.467228	0.649847	0	0	1.2850033348725052	0.9778068769544185	BRSK2;GPM6B
Regulation of Protein Metabolic Process (GO:0051246)	2/75	0.467228	0.649847	0	0	1.2850033348725052	0.9778068769544185	GEMIN5;EIF4E
Positive Regulation of Cellular Component Biogenesis (GO:0044089)	2/75	0.467228	0.649847	0	0	1.2850033348725052	0.9778068769544185	ICE1;TFRC
Protein Dephosphorylation (GO:0006470)	2/75	0.467228	0.649847	0	0	1.2850033348725052	0.9778068769544185	PPP1CC;PPM1D
Regulation of Defense Response to Virus by Host (GO:0050691)	1/30	0.469882	0.649847	0	0	1.6169583118888318	1.221244940584529	DHX9
Negative Regulation of Insulin Receptor Signaling Pathway (GO:0046627)	1/30	0.469882	0.649847	0	0	1.6169583118888318	1.221244940584529	SLC27A4
L-alpha-amino Acid Transmembrane Transport (GO:1902475)	1/30	0.469882	0.649847	0	0	1.6169583118888318	1.221244940584529	SLC38A5
Regulation of Metaphase/Anaphase Transition of Cell Cycle (GO:1902099)	1/30	0.469882	0.649847	0	0	1.6169583118888318	1.221244940584529	CDC6
Antimicrobial Humoral Immune Response Mediated by Antimicrobial Peptide (GO:0061844)	1/30	0.469882	0.649847	0	0	1.6169583118888318	1.221244940584529	HMGN2
Regulation of Ossification (GO:0030278)	1/30	0.469882	0.649847	0	0	1.6169583118888318	1.221244940584529	CHSY1
Regulation of Release of Cytochrome C From Mitochondria (GO:0090199)	1/30	0.469882	0.649847	0	0	1.6169583118888318	1.221244940584529	PRELID1
Phosphatidylinositol 3-Kinase/Protein Kinase B Signal Transduction (GO:0043491)	1/30	0.469882	0.649847	0	0	1.6169583118888318	1.221244940584529	C1QBP
Positive Regulation of Establishment of Protein Localization to Mitochondrion (GO:1903749)	1/30	0.469882	0.649847	0	0	1.6169583118888318	1.221244940584529	ARIH2
Positive Regulation of Exocytosis (GO:0045921)	1/30	0.469882	0.649847	0	0	1.6169583118888318	1.221244940584529	CADPS2
Positive Regulation of Proteolysis Involved in Protein Catabolic Process (GO:1903052)	1/30	0.469882	0.649847	0	0	1.6169583118888318	1.221244940584529	PSMC2
Protein Transmembrane Import Into Intracellular Organelle (GO:0044743)	1/30	0.469882	0.649847	0	0	1.6169583118888318	1.221244940584529	TIMM44
Regulation of DNA Binding (GO:0051101)	1/30	0.469882	0.649847	0	0	1.6169583118888318	1.221244940584529	NME1
Regulation of T Cell Differentiation (GO:0045580)	1/30	0.469882	0.649847	0	0	1.6169583118888318	1.221244940584529	PRELID1
Negative Regulation of DNA Recombination (GO:0045910)	1/30	0.469882	0.649847	0	0	1.6169583118888318	1.221244940584529	C1QBP
Negative Regulation of Biosynthetic Process (GO:0009890)	1/30	0.469882	0.649847	0	0	1.6169583118888318	1.221244940584529	PGP
Cell Surface Receptor Protein Tyrosine Kinase Signaling Pathway (GO:0007169)	5/216	0.472848	0.653296	0	0	1.111679592129829	0.8326271244473413	LYN;NUS1;SLTM;STXBP4;CRK
Regulation of Mitotic Cell Cycle Phase Transition (GO:1901990)	2/76	0.474117	0.653742	0	0	1.2675372001214698	0.9459655829557513	PSME3;CDC6
Protein Modification by Small Protein Removal (GO:0070646)	2/76	0.474117	0.653742	0	0	1.2675372001214698	0.9459655829557513	COPS3;USP15
BMP Signaling Pathway (GO:0030509)	1/31	0.480993	0.654737	0	0	1.5629353233830845	1.1439174276083763	USP15
JNK Cascade (GO:0007254)	1/31	0.480993	0.654737	0	0	1.5629353233830845	1.1439174276083763	MAP4K3
Neuron Projection Extension (GO:1990138)	1/31	0.480993	0.654737	0	0	1.5629353233830845	1.1439174276083763	LLPH
Positive Regulation of B Cell Activation (GO:0050871)	1/31	0.480993	0.654737	0	0	1.5629353233830845	1.1439174276083763	TFRC
Cellular Response to Vascular Endothelial Growth Factor Stimulus (GO:0035924)	1/31	0.480993	0.654737	0	0	1.5629353233830845	1.1439174276083763	NUS1
Substantia Nigra Development (GO:0021762)	1/31	0.480993	0.654737	0	0	1.5629353233830845	1.1439174276083763	NDUFS3
Positive Regulation of Leukocyte Chemotaxis (GO:0002690)	1/31	0.480993	0.654737	0	0	1.5629353233830845	1.1439174276083763	C1QBP
Glycosphingolipid Metabolic Process (GO:0006687)	1/31	0.480993	0.654737	0	0	1.5629353233830845	1.1439174276083763	CLN6
Purine Nucleotide Metabolic Process (GO:0006163)	1/31	0.480993	0.654737	0	0	1.5629353233830845	1.1439174276083763	MTHFD1
Negative Regulation of BMP Signaling Pathway (GO:0030514)	1/31	0.480993	0.654737	0	0	1.5629353233830845	1.1439174276083763	RBPMS2
Regulation of Axonogenesis (GO:0050770)	1/31	0.480993	0.654737	0	0	1.5629353233830845	1.1439174276083763	BRSK2
Negative Regulation of Cell Cycle Process (GO:0010948)	1/31	0.480993	0.654737	0	0	1.5629353233830845	1.1439174276083763	ESPL1
Negative Regulation of Cellular Response to Insulin Stimulus (GO:1900077)	1/31	0.480993	0.654737	0	0	1.5629353233830845	1.1439174276083763	SLC27A4
Chromatin Organization (GO:0006325)	6/266	0.483644	0.657271	0	0	1.082421760748757	0.7862770451161384	DNMT1;MYBBP1A;DHX9;GRWD1;PSME4;HMGN2
Positive Regulation of DNA-templated Transcription (GO:0045893)	20/931	0.483804	0.657271	0	0	1.0302461216986496	0.7480353532998982	ACTR3;ZNF143;SF3B3;ICE1;CHUK;DHX9;YWHAB;HEATR1;PPRC1;NR3C1;ETS1;PHF5A;TFDP1;DHX33;SLTM;MYBBP1A;MYBL2;E2F4;NAA15;ATF4
Cellular Response to Transforming Growth Factor Beta Stimulus (GO:0071560)	2/78	0.487731	0.660444	0	0	1.2339838359944806	0.8859903620491341	USP15;NR3C1
Establishment of Protein Localization to Organelle (GO:0072594)	2/78	0.487731	0.660444	0	0	1.2339838359944806	0.8859903620491341	NUTF2;IPO5
Regulation of Intracellular Protein Transport (GO:0033157)	1/32	0.491871	0.660444	0	0	1.5123976889744823	1.0731047767303383	ICE1
Neurotransmitter Transport (GO:0006836)	1/32	0.491871	0.660444	0	0	1.5123976889744823	1.0731047767303383	SLC22A3
Oligosaccharide Metabolic Process (GO:0009311)	1/32	0.491871	0.660444	0	0	1.5123976889744823	1.0731047767303383	B3GALT1
Positive Regulation of Lymphocyte Proliferation (GO:0050671)	1/32	0.491871	0.660444	0	0	1.5123976889744823	1.0731047767303383	TFRC
Integrated Stress Response Signaling (GO:0140467)	1/32	0.491871	0.660444	0	0	1.5123976889744823	1.0731047767303383	ATF4
Positive Regulation of Viral Process (GO:0048524)	1/32	0.491871	0.660444	0	0	1.5123976889744823	1.0731047767303383	DHX9
miRNA Processing (GO:0035196)	1/32	0.491871	0.660444	0	0	1.5123976889744823	1.0731047767303383	NCBP1
Mitochondrial Electron Transport, NADH to Ubiquinone (GO:0006120)	1/32	0.491871	0.660444	0	0	1.5123976889744823	1.0731047767303383	NDUFS3
Regulation of DNA-templated Transcription Elongation (GO:0032784)	1/32	0.491871	0.660444	0	0	1.5123976889744823	1.0731047767303383	WDR82
Regulation of G2/M Transition of Mitotic Cell Cycle (GO:0010389)	1/32	0.491871	0.660444	0	0	1.5123976889744823	1.0731047767303383	DTL
Negative Regulation of Defense Response (GO:0031348)	2/79	0.494455	0.662627	0	0	1.2178607908944987	0.8577381037039055	DDX39A;C1QBP
Positive Regulation of Protein Catabolic Process (GO:0045732)	2/79	0.494455	0.662627	0	0	1.2178607908944987	0.8577381037039055	PSMC2;DTL
Regulation of Double-Strand Break Repair (GO:2000779)	2/80	0.501123	0.666975	0	0	1.202151157207337	0.8305696051086945	POLR1B;UBE2N
Positive Regulation of Cellular Component Organization (GO:0051130)	2/80	0.501123	0.666975	0	0	1.202151157207337	0.8305696051086945	ICE1;TFRC
DNA Damage Checkpoint Signaling (GO:0000077)	1/33	0.502522	0.666975	0	0	1.4650186567164178	1.0081020446632982	LYN
Regulation of Protein Targeting to Mitochondrion (GO:1903214)	1/33	0.502522	0.666975	0	0	1.4650186567164178	1.0081020446632982	ARIH2
Regulation of Smooth Muscle Cell Proliferation (GO:0048660)	1/33	0.502522	0.666975	0	0	1.4650186567164178	1.0081020446632982	RBPMS2
Positive Regulation of Chemotaxis (GO:0050921)	1/33	0.502522	0.666975	0	0	1.4650186567164178	1.0081020446632982	SLTM
Sterol Metabolic Process (GO:0016125)	1/33	0.502522	0.666975	0	0	1.4650186567164178	1.0081020446632982	CLN6
Lipid Modification (GO:0030258)	1/33	0.502522	0.666975	0	0	1.4650186567164178	1.0081020446632982	B3GALT1
Proton Transmembrane Transport (GO:1902600)	1/33	0.502522	0.666975	0	0	1.4650186567164178	1.0081020446632982	ATP6V0B
Regulation of T Cell Proliferation (GO:0042129)	1/33	0.502522	0.666975	0	0	1.4650186567164178	1.0081020446632982	TFRC
Positive Regulation of Transcription by RNA Polymerase II (GO:0045944)	15/702	0.503778	0.668002	0	0	1.023708008114706	0.7018733088977714	ACTR3;ZNF143;CHUK;NCBP1;DHX9;YWHAB;PPRC1;NR3C1;ETS1;TFDP1;SLTM;MYBBP1A;MYBL2;E2F4;ATF4
Positive Regulation of Epithelial Cell Proliferation (GO:0050679)	2/81	0.507735	0.671317	0	0	1.1868392357654198	0.8044339610817026	STXBP4;NME1
Regulation of Actin Filament-Based Process (GO:0032970)	2/81	0.507735	0.671317	0	0	1.1868392357654198	0.8044339610817026	CRK;GPM6B
Regulation of Cell Motility (GO:2000145)	2/81	0.507735	0.671317	0	0	1.1868392357654198	0.8044339610817026	SPATA13;CRK
Negative Regulation of Double-Strand Break Repair (GO:2000780)	1/34	0.512951	0.671791	0	0	1.4205110809588422	0.9482979215265223	C1QBP
Nuclear Receptor-Mediated Steroid Hormone Signaling Pathway (GO:0030518)	1/34	0.512951	0.671791	0	0	1.4205110809588422	0.9482979215265223	NR3C1
Nucleosome Assembly (GO:0006334)	1/34	0.512951	0.671791	0	0	1.4205110809588422	0.9482979215265223	GRWD1
Cellular Response to Amino Acid Stimulus (GO:0071230)	1/34	0.512951	0.671791	0	0	1.4205110809588422	0.9482979215265223	IPO5
Response to Retinoic Acid (GO:0032526)	1/34	0.512951	0.671791	0	0	1.4205110809588422	0.9482979215265223	LYN
Establishment of Mitotic Spindle Localization (GO:0040001)	1/34	0.512951	0.671791	0	0	1.4205110809588422	0.9482979215265223	ESPL1
Learning (GO:0007612)	1/34	0.512951	0.671791	0	0	1.4205110809588422	0.9482979215265223	YTHDF1
Regulated Exocytosis (GO:0045055)	1/34	0.512951	0.671791	0	0	1.4205110809588422	0.9482979215265223	LYN
Muscle Organ Development (GO:0007517)	1/34	0.512951	0.671791	0	0	1.4205110809588422	0.9482979215265223	TEAD4
Regulation of Cellular Component Biogenesis (GO:0044087)	1/34	0.512951	0.671791	0	0	1.4205110809588422	0.9482979215265223	HSPA8
Generation of Neurons (GO:0048699)	3/130	0.513553	0.671943	0	0	1.1073056657391511	0.7379115221682264	BRSK2;SLTM;ANOS1
Protein K48-linked Ubiquitination (GO:0070936)	2/82	0.51429	0.672271	0	0	1.1719101123595506	0.7792831682726946	KCMF1;ARIH2
ERAD Pathway (GO:0036503)	2/83	0.520787	0.67368	0	0	1.1573496092846904	0.755071928942708	BRSK2;UFD1
Epithelium Development (GO:0060429)	2/83	0.520787	0.67368	0	0	1.1573496092846904	0.755071928942708	PCNA;MTHFD1
Regulation of Fibroblast Proliferation (GO:0048145)	1/35	0.523162	0.67368	0	0	1.3786215978928884	0.8931600404079558	DHX9
Antimicrobial Humoral Response (GO:0019730)	1/35	0.523162	0.67368	0	0	1.3786215978928884	0.8931600404079558	HMGN2
Regulation of Release of Sequestered Calcium Ion Into Cytosol (GO:0051279)	1/35	0.523162	0.67368	0	0	1.3786215978928884	0.8931600404079558	DIAPH1
Carboxylic Acid Transport (GO:0046942)	1/35	0.523162	0.67368	0	0	1.3786215978928884	0.8931600404079558	SLC38A5
Pattern Recognition Receptor Signaling Pathway (GO:0002221)	1/35	0.523162	0.67368	0	0	1.3786215978928884	0.8931600404079558	IPO5
Peptidyl-Tyrosine Modification (GO:0018212)	1/35	0.523162	0.67368	0	0	1.3786215978928884	0.8931600404079558	LYN
Cellular Response to BMP Stimulus (GO:0071773)	1/35	0.523162	0.67368	0	0	1.3786215978928884	0.8931600404079558	USP15
Regulation of Trans-Synaptic Signaling (GO:0099177)	1/35	0.523162	0.67368	0	0	1.3786215978928884	0.8931600404079558	FABP5
Regulation of Wound Healing (GO:0061041)	1/35	0.523162	0.67368	0	0	1.3786215978928884	0.8931600404079558	CRK
Positive Regulation of Interleukin-6 Production (GO:0032755)	1/35	0.523162	0.67368	0	0	1.3786215978928884	0.8931600404079558	DHX9
Positive Regulation of Pattern Recognition Receptor Signaling Pathway (GO:0062208)	1/35	0.523162	0.67368	0	0	1.3786215978928884	0.8931600404079558	USP15
Intrinsic Apoptotic Signaling Pathway by P53 Class Mediator (GO:0072332)	1/35	0.523162	0.67368	0	0	1.3786215978928884	0.8931600404079558	MYBBP1A
Lysosome Organization (GO:0007040)	1/35	0.523162	0.67368	0	0	1.3786215978928884	0.8931600404079558	CLN6
Regulation of T Cell Activation (GO:0050863)	1/35	0.523162	0.67368	0	0	1.3786215978928884	0.8931600404079558	PRELID1
Negative Regulation of Cold-Induced Thermogenesis (GO:0120163)	1/36	0.533159	0.682049	0	0	1.3391257995735608	0.8422229307292493	ATF4
Regulation of Exocytosis (GO:0017157)	1/36	0.533159	0.682049	0	0	1.3391257995735608	0.8422229307292493	CADPS2
Negative Regulation of Protein Localization (GO:1903828)	1/36	0.533159	0.682049	0	0	1.3391257995735608	0.8422229307292493	GPM6B
Regulation of Metabolic Process (GO:0019222)	1/36	0.533159	0.682049	0	0	1.3391257995735608	0.8422229307292493	LPAR3
Carboxylic Acid Transmembrane Transport (GO:1905039)	1/36	0.533159	0.682049	0	0	1.3391257995735608	0.8422229307292493	SLC38A5
Cellular Response to Ketone (GO:1901655)	1/36	0.533159	0.682049	0	0	1.3391257995735608	0.8422229307292493	NR3C1
Epidermis Development (GO:0008544)	1/36	0.533159	0.682049	0	0	1.3391257995735608	0.8422229307292493	FABP5
Protein Catabolic Process (GO:0030163)	2/85	0.533606	0.682049	0	0	1.1292811696223095	0.7092993746863635	HSPA8;CLN6
Dephosphorylation (GO:0016311)	2/86	0.539927	0.68822	0	0	1.1157481719279472	0.6876594322646779	PPP1CC;PPM1D
Regulation of Wnt Signaling Pathway (GO:0030111)	2/86	0.539927	0.68822	0	0	1.1157481719279472	0.6876594322646779	TMEM237;WIF1
Regulation of Actin Cytoskeleton Organization (GO:0032956)	2/86	0.539927	0.68822	0	0	1.1157481719279472	0.6876594322646779	CRK;GPM6B
Negative Regulation of Immune System Process (GO:0002683)	1/37	0.542948	0.688265	0	0	1.3018242122719734	0.7950780826431117	LYN
Negative Regulation of Kinase Activity (GO:0033673)	1/37	0.542948	0.688265	0	0	1.3018242122719734	0.7950780826431117	PRDX3
Negative Regulation of mRNA Catabolic Process (GO:1902373)	1/37	0.542948	0.688265	0	0	1.3018242122719734	0.7950780826431117	DHX9
Response to Molecule of Bacterial Origin (GO:0002237)	1/37	0.542948	0.688265	0	0	1.3018242122719734	0.7950780826431117	PRDX3
Semaphorin-Plexin Signaling Pathway (GO:0071526)	1/37	0.542948	0.688265	0	0	1.3018242122719734	0.7950780826431117	SLTM
Establishment of Protein Localization to Plasma Membrane (GO:0061951)	1/37	0.542948	0.688265	0	0	1.3018242122719734	0.7950780826431117	RAB34
Response to Lipopolysaccharide (GO:0032496)	2/87	0.546189	0.691739	0	0	1.1025335977087465	0.6668014916815945	PRDX3;VIM
Negative Regulation of DNA-binding Transcription Factor Activity (GO:0043433)	2/88	0.552391	0.693423	0	0	1.089626339169062	0.6466913317498805	SIVA1;CHUK
Regulation of Cyclin-Dependent Protein Serine/Threonine Kinase Activity (GO:0000079)	1/38	0.552532	0.693423	0	0	1.2665389269866882	0.7513657052708927	CDC6
Regulation of Dendrite Development (GO:0050773)	1/38	0.552532	0.693423	0	0	1.2665389269866882	0.7513657052708927	HECW1
Regulation of Hippo Signaling (GO:0035330)	1/38	0.552532	0.693423	0	0	1.2665389269866882	0.7513657052708927	WWC3
Glucose Metabolic Process (GO:0006006)	1/38	0.552532	0.693423	0	0	1.2665389269866882	0.7513657052708927	ATF4
Macromolecule Catabolic Process (GO:0009057)	1/38	0.552532	0.693423	0	0	1.2665389269866882	0.7513657052708927	CLN6
Macromolecule Glycosylation (GO:0043413)	1/38	0.552532	0.693423	0	0	1.2665389269866882	0.7513657052708927	NUS1
Protein Localization to Cilium (GO:0061512)	1/38	0.552532	0.693423	0	0	1.2665389269866882	0.7513657052708927	ARL6
protein-DNA Complex Assembly (GO:0065004)	1/38	0.552532	0.693423	0	0	1.2665389269866882	0.7513657052708927	GRWD1
Receptor Internalization (GO:0031623)	1/38	0.552532	0.693423	0	0	1.2665389269866882	0.7513657052708927	TFRC
Regulation of Organelle Organization (GO:0033043)	2/89	0.558534	0.70032	0	0	1.0770157992164966	0.6272965386928069	DIAPH1;PDE4DIP
DNA Recombination (GO:0006310)	1/39	0.561916	0.701381	0	0	1.2331107619795758	0.7107678559111696	SUPV3L1
Negative Regulation of Protein Serine/Threonine Kinase Activity (GO:0071901)	1/39	0.561916	0.701381	0	0	1.2331107619795758	0.7107678559111696	LYN
Regulation of Type II Interferon Production (GO:0032649)	1/39	0.561916	0.701381	0	0	1.2331107619795758	0.7107678559111696	C1QBP
Positive Regulation of Transport (GO:0051050)	1/39	0.561916	0.701381	0	0	1.2331107619795758	0.7107678559111696	SIVA1
Regulation of Autophagosome Assembly (GO:2000785)	1/39	0.561916	0.701381	0	0	1.2331107619795758	0.7107678559111696	WDR45
Negative Regulation of Translation (GO:0017148)	2/90	0.564617	0.704116	0	0	1.0646918624446715	0.6085863934621382	IFRD2;ZNF598
G2/M Transition of Mitotic Cell Cycle (GO:0000086)	1/40	0.571104	0.706473	0	0	1.2013968618446231	0.6730026825265518	BRSK2
Negative Regulation of Protein Modification Process (GO:0031400)	1/40	0.571104	0.706473	0	0	1.2013968618446231	0.6730026825265518	LYN
Regulation of Microtubule-Based Process (GO:0032886)	1/40	0.571104	0.706473	0	0	1.2013968618446231	0.6730026825265518	DIAPH1
Regulation of Proteolysis (GO:0030162)	1/40	0.571104	0.706473	0	0	1.2013968618446231	0.6730026825265518	CLN6
Cellular Response to Mechanical Stimulus (GO:0071260)	1/40	0.571104	0.706473	0	0	1.2013968618446231	0.6730026825265518	TNFRSF8
Skin Development (GO:0043588)	1/40	0.571104	0.706473	0	0	1.2013968618446231	0.6730026825265518	DHCR24
Fatty Acid Oxidation (GO:0019395)	1/40	0.571104	0.706473	0	0	1.2013968618446231	0.6730026825265518	SLC25A17
Purine Ribonucleotide Metabolic Process (GO:0009150)	1/40	0.571104	0.706473	0	0	1.2013968618446231	0.6730026825265518	HSPA8
Negative Regulation of ERK1 and ERK2 Cascade (GO:0070373)	1/40	0.571104	0.706473	0	0	1.2013968618446231	0.6730026825265518	LYN
Regulation of G1/S Transition of Mitotic Cell Cycle (GO:2000045)	2/92	0.576601	0.71061	0	0	1.0408655846858095	0.5731050200957661	TFDP1;PSME3
Actin Polymerization or Depolymerization (GO:0008154)	1/41	0.5801	0.71061	0	0	1.1712686567164179	0.6378195778041658	DIAPH1
Negative Regulation of Protein-Containing Complex Assembly (GO:0031333)	1/41	0.5801	0.71061	0	0	1.1712686567164179	0.6378195778041658	HSPA8
Antiviral Innate Immune Response (GO:0140374)	1/41	0.5801	0.71061	0	0	1.1712686567164179	0.6378195778041658	UBE2N
Neurogenesis (GO:0022008)	1/41	0.5801	0.71061	0	0	1.1712686567164179	0.6378195778041658	WDR62
Peptidyl-Tyrosine Phosphorylation (GO:0018108)	1/41	0.5801	0.71061	0	0	1.1712686567164179	0.6378195778041658	LYN
Replication Fork Processing (GO:0031297)	1/41	0.5801	0.71061	0	0	1.1712686567164179	0.6378195778041658	PCNA
Translational Elongation (GO:0006414)	1/41	0.5801	0.71061	0	0	1.1712686567164179	0.6378195778041658	ZNF598
Gland Development (GO:0048732)	1/41	0.5801	0.71061	0	0	1.1712686567164179	0.6378195778041658	SLTM
Positive Regulation of Proteolysis (GO:0045862)	1/41	0.5801	0.71061	0	0	1.1712686567164179	0.6378195778041658	CLN6
Insulin Receptor Signaling Pathway (GO:0008286)	1/41	0.5801	0.71061	0	0	1.1712686567164179	0.6378195778041658	STXBP4
Protein Complex Oligomerization (GO:0051259)	2/93	0.582503	0.712922	0	0	1.0293451866485575	0.5562799191817293	LETM1;PNPT1
- Reg of Transmembrane Receptor Prot Serine/Threonine Kinase Sgnlng Pway (GO:0090101)	2/94	0.588344	0.716954	0	0	1.018075232046898	0.5400315456042859	USP15;RBPMS2
Skeletal System Development (GO:0001501)	2/94	0.588344	0.716954	0	0	1.018075232046898	0.5400315456042859	TEAD4;UFD1
Negative Regulation of Protein Catabolic Process (GO:0042177)	1/42	0.588908	0.716954	0	0	1.1426101201310521	0.604995080518446	SF3B3
Organelle Disassembly (GO:1903008)	1/42	0.588908	0.716954	0	0	1.1426101201310521	0.604995080518446	MRRF
Intracellular Iron Ion Homeostasis (GO:0006879)	1/42	0.588908	0.716954	0	0	1.1426101201310521	0.604995080518446	TFRC
Protein Localization to Chromosome (GO:0034502)	1/42	0.588908	0.716954	0	0	1.1426101201310521	0.604995080518446	POLR1B
Regulation of Hydrolase Activity (GO:0051336)	1/43	0.597532	0.723631	0	0	1.115316275764037	0.5743293969255064	CRK
Regulation of Insulin Receptor Signaling Pathway (GO:0046626)	1/43	0.597532	0.723631	0	0	1.115316275764037	0.5743293969255064	SLC27A4
Cell Cycle G2/M Phase Transition (GO:0044839)	1/43	0.597532	0.723631	0	0	1.115316275764037	0.5743293969255064	BRSK2
Phospholipid Transport (GO:0015914)	1/43	0.597532	0.723631	0	0	1.115316275764037	0.5743293969255064	PRELID1
Positive Regulation of Intracellular Transport (GO:0032388)	1/43	0.597532	0.723631	0	0	1.115316275764037	0.5743293969255064	ICE1
Fatty Acid Beta-Oxidation (GO:0006635)	1/43	0.597532	0.723631	0	0	1.115316275764037	0.5743293969255064	SLC25A17
MAPK Cascade (GO:0000165)	2/96	0.599844	0.725796	0	0	0.9962546816479401	0.5091714337164793	PPP1CC;MAP4K3
Intracellular Signaling Cassette (GO:0141124)	5/250	0.602621	0.726225	0	0	0.9547773654916512	0.48356270831470555	PPP1CC;CHUK;DDAH1;C1QBP;ATF4
Negative Regulation of Metabolic Process (GO:0009892)	1/44	0.605976	0.726225	0	0	1.0892919125303715	0.54564343421408	ATF4
Rho Protein Signal Transduction (GO:0007266)	1/44	0.605976	0.726225	0	0	1.0892919125303715	0.54564343421408	ARHGDIA
Negative Regulation of Small GTPase Mediated Signal Transduction (GO:0051058)	1/44	0.605976	0.726225	0	0	1.0892919125303715	0.54564343421408	SLTM
Nucleus Organization (GO:0006997)	1/44	0.605976	0.726225	0	0	1.0892919125303715	0.54564343421408	NUP205
Phospholipid Metabolic Process (GO:0006644)	1/44	0.605976	0.726225	0	0	1.0892919125303715	0.54564343421408	PGP
Response to Reactive Oxygen Species (GO:0000302)	1/44	0.605976	0.726225	0	0	1.0892919125303715	0.54564343421408	PRDX3
Signal Transduction by P53 Class Mediator (GO:0072331)	1/44	0.605976	0.726225	0	0	1.0892919125303715	0.54564343421408	MYBBP1A
Steroid Metabolic Process (GO:0008202)	1/44	0.605976	0.726225	0	0	1.0892919125303715	0.54564343421408	DHCR24
tRNA Processing (GO:0008033)	1/44	0.605976	0.726225	0	0	1.0892919125303715	0.54564343421408	FAM98A
Negative Regulation of TORC1 Signaling (GO:1904262)	1/44	0.605976	0.726225	0	0	1.0892919125303715	0.54564343421408	UBE2N
Positive Regulation of Metabolic Process (GO:0009893)	2/98	0.611102	0.731695	0	0	0.9753433208489388	0.48034885347521133	PRELID1;FABP5
ATP Metabolic Process (GO:0046034)	1/45	0.614243	0.731695	0	0	1.0644504748982362	0.5187762626389449	HSPA8
Regulation of Extrinsic Apoptotic Signaling Pathway (GO:2001236)	1/45	0.614243	0.731695	0	0	1.0644504748982362	0.5187762626389449	PSME3
Regulation of Protein Localization to Nucleus (GO:1900180)	1/45	0.614243	0.731695	0	0	1.0644504748982362	0.5187762626389449	TFRC
Positive Regulation of Cell Cycle (GO:0045787)	1/45	0.614243	0.731695	0	0	1.0644504748982362	0.5187762626389449	EIF4E
Endoplasmic Reticulum Unfolded Protein Response (GO:0030968)	1/45	0.614243	0.731695	0	0	1.0644504748982362	0.5187762626389449	ATF4
Positive Regulation of Transcription Elongation by RNA Polymerase II (GO:0032968)	1/45	0.614243	0.731695	0	0	1.0644504748982362	0.5187762626389449	NCBP1
Regulation of Focal Adhesion Assembly (GO:0051893)	1/46	0.622337	0.740062	0	0	1.0407131011608624	0.4935829356693541	GPM6B
mRNA Stabilization (GO:0048255)	1/46	0.622337	0.740062	0	0	1.0407131011608624	0.4935829356693541	DHX9
Positive Regulation of Catabolic Process (GO:0009896)	3/153	0.624049	0.74146	0	0	0.9357894736842105	0.4412496679200265	SUPV3L1;PNPT1;DTL
Receptor-Mediated Endocytosis (GO:0006898)	2/101	0.627534	0.743731	0	0	0.9455604736503613	0.4405911174431528	TFRC;RABEPK
Mitotic Cell Cycle Phase Transition (GO:0044772)	2/101	0.627534	0.743731	0	0	0.9455604736503613	0.4405911174431528	BRSK2;EIF4E
Protein Localization (GO:0008104)	6/309	0.630128	0.743731	0	0	0.9255731656815872	0.42745915026833814	HSPA9;ARL6;YWHAB;USO1;TIMM44;WDR45
Endosome Organization (GO:0007032)	1/47	0.630262	0.743731	0	0	1.0180077871512005	0.46993261143744386	ATP6V0B
Glycolipid Biosynthetic Process (GO:0009247)	1/47	0.630262	0.743731	0	0	1.0180077871512005	0.46993261143744386	PGAP2
mRNA Destabilization (GO:0061157)	1/47	0.630262	0.743731	0	0	1.0180077871512005	0.46993261143744386	YTHDF1
Memory (GO:0007613)	1/47	0.630262	0.743731	0	0	1.0180077871512005	0.46993261143744386	YTHDF1
Regulation of G Protein-Coupled Receptor Signaling Pathway (GO:0008277)	1/47	0.630262	0.743731	0	0	1.0180077871512005	0.46993261143744386	YWHAB
Negative Regulation of Protein Ubiquitination (GO:0031397)	1/48	0.638021	0.751604	0	0	0.996268656716418	0.4477069289636285	U2AF2
Proton Motive Force-Driven Mitochondrial ATP Synthesis (GO:0042776)	1/48	0.638021	0.751604	0	0	0.996268656716418	0.4477069289636285	NDUFS3
Lipid Metabolic Process (GO:0006629)	3/157	0.641425	0.754971	0	0	0.9111903134459526	0.40462555833578884	FABP5;DHCR24;SLC27A4
Regulation of Canonical NF-kappaB Signal Transduction (GO:0043122)	4/210	0.643538	0.755406	0	0	0.9078585821579044	0.40016101585718833	TFRC;CHUK;SLC20A1;UBE2N
Negative Regulation of Intrinsic Apoptotic Signaling Pathway (GO:2001243)	1/49	0.645618	0.755406	0	0	0.9754353233830846	0.4267985993494933	DDIAS
T Cell Activation (GO:0042110)	1/49	0.645618	0.755406	0	0	0.9754353233830846	0.4267985993494933	CTPS1
Amide Biosynthetic Process (GO:0043604)	1/49	0.645618	0.755406	0	0	0.9754353233830846	0.4267985993494933	SMPD4
Epigenetic Regulation of Gene Expression (GO:0040029)	1/49	0.645618	0.755406	0	0	0.9754353233830846	0.4267985993494933	PPM1D
Positive Regulation of Secretion by Cell (GO:1903532)	1/49	0.645618	0.755406	0	0	0.9754353233830846	0.4267985993494933	CADPS2
Long-Chain Fatty Acid Metabolic Process (GO:0001676)	1/49	0.645618	0.755406	0	0	0.9754353233830846	0.4267985993494933	SLC27A4
Regulation of Cold-Induced Thermogenesis (GO:0120161)	2/105	0.648601	0.756974	0	0	0.908548780044362	0.39334541361556263	FABP5;ATF4
Protein Homooligomerization (GO:0051260)	2/105	0.648601	0.756974	0	0	0.908548780044362	0.39334541361556263	LETM1;PNPT1
Regulation of Cell Adhesion (GO:0030155)	2/105	0.648601	0.756974	0	0	0.908548780044362	0.39334541361556263	LYN;C1QBP
Negative Regulation of Extrinsic Apoptotic Signaling Pathway (GO:2001237)	1/50	0.653057	0.758335	0	0	0.9554523301858057	0.40711018028507356	PSME3
Nucleotide-Excision Repair (GO:0006289)	1/50	0.653057	0.758335	0	0	0.9554523301858057	0.40711018028507356	POLR1B
Cellular Response to Light Stimulus (GO:0071482)	1/50	0.653057	0.758335	0	0	0.9554523301858057	0.40711018028507356	PCNA
Telomere Organization (GO:0032200)	1/50	0.653057	0.758335	0	0	0.9554523301858057	0.40711018028507356	POLR1B
Fatty Acid Catabolic Process (GO:0009062)	1/50	0.653057	0.758335	0	0	0.9554523301858057	0.40711018028507356	SLC25A17
Regulation of Cell Communication (GO:0010646)	1/50	0.653057	0.758335	0	0	0.9554523301858057	0.40711018028507356	CRK
B Cell Activation (GO:0042113)	1/51	0.660339	0.762311	0	0	0.9362686567164179	0.38855300713379937	CTPS1
Nucleosome Organization (GO:0034728)	1/51	0.660339	0.762311	0	0	0.9362686567164179	0.38855300713379937	GRWD1
Positive Regulation of DNA Recombination (GO:0045911)	1/51	0.660339	0.762311	0	0	0.9362686567164179	0.38855300713379937	TFRC
Positive Regulation of DNA-templated Transcription, Elongation (GO:0032786)	1/51	0.660339	0.762311	0	0	0.9362686567164179	0.38855300713379937	NCBP1
Extrinsic Apoptotic Signaling Pathway (GO:0097191)	1/51	0.660339	0.762311	0	0	0.9362686567164179	0.38855300713379937	SIVA1
Regulation of MAP Kinase Activity (GO:0043405)	1/51	0.660339	0.762311	0	0	0.9362686567164179	0.38855300713379937	LYN
Regulation of Cell-Matrix Adhesion (GO:0001952)	1/51	0.660339	0.762311	0	0	0.9362686567164179	0.38855300713379937	GPM6B
Negative Regulation of Multicellular Organismal Process (GO:0051241)	3/162	0.662345	0.763989	0	0	0.8821818697687616	0.36343195258882266	CHSY1;WWC3;ATF4
Regulation of DNA Metabolic Process (GO:0051052)	2/108	0.663774	0.765	0	0	0.882623136174122	0.3617103182403303	SF3B3;UBE2N
Regulation of RNA Biosynthetic Process (GO:2001141)	7/373	0.667319	0.766067	0	0	0.8927752054394528	0.36111602638813667	ZNF143;TFDP1;UTP4;MYBBP1A;WWC3;NR3C1;ATF4
Negative Regulation of Protein Modification by Small Protein Conjugation or Removal (GO:1903321)	1/52	0.66747	0.766067	0	0	0.9178372841673983	0.37104625797304497	U2AF2
Positive Regulation of Protein Transport (GO:0051222)	1/52	0.66747	0.766067	0	0	0.9178372841673983	0.37104625797304497	ICE1
Proton Motive Force-Driven ATP Synthesis (GO:0015986)	1/52	0.66747	0.766067	0	0	0.9178372841673983	0.37104625797304497	NDUFS3
Metaphase Chromosome Alignment (GO:0051310)	1/52	0.66747	0.766067	0	0	0.9178372841673983	0.37104625797304497	RRS1
G1/S Transition of Mitotic Cell Cycle (GO:0000082)	1/53	0.674451	0.772157	0	0	0.9001148105625718	0.35451613246213776	EIF4E
Golgi to Plasma Membrane Transport (GO:0006893)	1/53	0.674451	0.772157	0	0	0.9001148105625718	0.35451613246213776	RAB34
Cellular Response to Unfolded Protein (GO:0034620)	1/53	0.674451	0.772157	0	0	0.9001148105625718	0.35451613246213776	ATF4
Double-Strand Break Repair (GO:0006302)	3/166	0.678436	0.776077	0	0	0.8602564693943447	0.3337492821691616	FEN1;POLR1B;UBE2N
Regulation of Immune Response (GO:0050776)	1/54	0.681286	0.776127	0	0	0.8830611095466065	0.3388951311708179	LYN
Regulation of Interleukin-6 Production (GO:0032675)	1/54	0.681286	0.776127	0	0	0.8830611095466065	0.3388951311708179	DHX9
T Cell Receptor Signaling Pathway (GO:0050852)	1/54	0.681286	0.776127	0	0	0.8830611095466065	0.3388951311708179	UBE2N
Regulation of BMP Signaling Pathway (GO:0030510)	1/54	0.681286	0.776127	0	0	0.8830611095466065	0.3388951311708179	RBPMS2
Mitotic Metaphase Chromosome Alignment (GO:0007080)	1/54	0.681286	0.776127	0	0	0.8830611095466065	0.3388951311708179	RRS1
Negative Regulation of Protein Metabolic Process (GO:0051248)	2/112	0.683183	0.777648	0	0	0.8502553626149132	0.32394056345301847	SF3B3;IFRD2
Protein Ubiquitination (GO:0016567)	6/327	0.68379	0.777699	0	0	0.8723925944351658	0.3316000049466216	WSB2;ARIH2;UBE2N;TPP2;ZNF598;DTL
DNA Damage Response (GO:0006974)	7/380	0.686086	0.779258	0	0	0.8755193090886765	0.3298537572688685	LYN;FEN1;MCM7;STXBP4;PSME4;MCM10;DTL
Phosphate-Containing Compound Metabolic Process (GO:0006796)	2/113	0.68789	0.779258	0	0	0.8425279211796066	0.31521136199870203	PPA1;SLC20A1
Negative Regulation of Wnt Signaling Pathway (GO:0030178)	2/113	0.68789	0.779258	0	0	0.8425279211796066	0.31521136199870203	WIF1;HECW1
Autophagy of Mitochondrion (GO:0000422)	1/55	0.687978	0.779258	0	0	0.8666390270867883	0.32412141919852255	WDR45
Cell Cycle G1/S Phase Transition (GO:0044843)	1/55	0.687978	0.779258	0	0	0.8666390270867883	0.32412141919852255	EIF4E
Negative Regulation of Cell Motility (GO:2000146)	2/114	0.69254	0.782832	0	0	0.8349384697699305	0.30674726528565277	NAV3;CRK
Negative Regulation of Neuron Apoptotic Process (GO:0043524)	1/56	0.69453	0.782832	0	0	0.8508141112618725	0.31013826437292275	ATF4
Oxidative Phosphorylation (GO:0006119)	1/56	0.69453	0.782832	0	0	0.8508141112618725	0.31013826437292275	NDUFS3
Regulation of Transcription Initiation by RNA Polymerase II (GO:0060260)	1/56	0.69453	0.782832	0	0	0.8508141112618725	0.31013826437292275	PPM1D
Muscle Contraction (GO:0006936)	1/56	0.69453	0.782832	0	0	0.8508141112618725	0.31013826437292275	MYH2
Negative Regulation of Cellular Response to Growth Factor Stimulus (GO:0090288)	1/56	0.69453	0.782832	0	0	0.8508141112618725	0.31013826437292275	RBPMS2
Positive Regulation of Cytokine Production (GO:0001819)	3/171	0.697747	0.785818	0	0	0.8343179377013964	0.30027008949264783	DHX33;DHX9;ATF4
Mitotic Cytokinesis (GO:0000281)	1/57	0.700945	0.788309	0	0	0.8355543710021321	0.29689353968548704	ESPL1
Response to Endoplasmic Reticulum Stress (GO:0034976)	3/172	0.701502	0.788309	0	0	0.8293144102860702	0.2940178134664006	BRSK2;UFD1;ATF4
Nitrogen Compound Transport (GO:0071705)	2/116	0.701669	0.788309	0	0	0.8201590117616138	0.29057735002513185	SLC22A3;SLC38A5
Positive Regulation of Organelle Assembly (GO:1902117)	1/58	0.707226	0.793264	0	0	0.8208300602251899	0.2843392813858683	WDR45
Monoatomic Cation Homeostasis (GO:0055080)	1/58	0.707226	0.793264	0	0	0.8208300602251899	0.2843392813858683	TFRC
Apoptotic Process (GO:0006915)	3/174	0.708907	0.794504	0	0	0.8194829178208679	0.28192778915711725	MCM7;ESPL1;IFT57
DNA-templated Transcription Initiation (GO:0006352)	1/59	0.713376	0.796929	0	0	0.8066134843026248	0.2724312965196928	POLRMT
Cellular Response to Reactive Oxygen Species (GO:0034614)	1/59	0.713376	0.796929	0	0	0.8066134843026248	0.2724312965196928	PRDX3
Glycoprotein Biosynthetic Process (GO:0009101)	1/59	0.713376	0.796929	0	0	0.8066134843026248	0.2724312965196928	NUS1
Negative Regulation of Cellular Component Organization (GO:0051129)	1/59	0.713376	0.796929	0	0	0.8066134843026248	0.2724312965196928	HSPA8
Protein Glycosylation (GO:0006486)	2/119	0.71494	0.798032	0	0	0.798937225903518	0.26808911049672685	NUS1;B3GALT1
Cellular Response to Growth Factor Stimulus (GO:0071363)	2/120	0.719252	0.799779	0	0	0.7921030914746398	0.2610321366266981	DDX18;NR3C1
Aerobic Electron Transport Chain (GO:0019646)	1/60	0.719396	0.799779	0	0	0.7928788262079434	0.2611288124442653	NDUFS3
Regulation of Protein Serine/Threonine Kinase Activity (GO:0071900)	1/60	0.719396	0.799779	0	0	0.7928788262079434	0.2611288124442653	CDC6
Regulation of Stress Fiber Assembly (GO:0051492)	1/60	0.719396	0.799779	0	0	0.7928788262079434	0.2611288124442653	SLTM
Protein Tetramerization (GO:0051262)	1/60	0.719396	0.799779	0	0	0.7928788262079434	0.2611288124442653	FARSB
Cellular Response to Molecule of Bacterial Origin (GO:0071219)	1/61	0.725291	0.803748	0	0	0.7796019900497513	0.2503941647605874	VIM
Telomere Maintenance (GO:0000723)	1/61	0.725291	0.803748	0	0	0.7796019900497513	0.2503941647605874	POLR1B
Establishment of Protein Localization to Membrane (GO:0090150)	1/61	0.725291	0.803748	0	0	0.7796019900497513	0.2503941647605874	ARL6
Mitochondrial ATP Synthesis Coupled Electron Transport (GO:0042775)	1/61	0.725291	0.803748	0	0	0.7796019900497513	0.2503941647605874	NDUFS3
Cellular Response to Nitrogen Compound (GO:1901699)	2/122	0.727713	0.805787	0	0	0.7787765293383271	0.24753265363153637	DIAPH1;VIM
Cellular Response to Cytokine Stimulus (GO:0071345)	3/180	0.730277	0.807556	0	0	0.7913215241493564	0.24873763154890383	SMPD4;PNPT1;CHUK
Autophagosome Organization (GO:1905037)	1/62	0.731063	0.807556	0	0	0.7667604599951064	0.24019251701473684	WDR45
Calcium Ion Homeostasis (GO:0055074)	1/62	0.731063	0.807556	0	0	0.7667604599951064	0.24019251701473684	ATP13A1
Positive Regulation of T Cell Activation (GO:0050870)	1/63	0.736713	0.811852	0	0	0.7543331728454502	0.2304916106996307	TFRC
Transforming Growth Factor Beta Receptor Signaling Pathway (GO:0007179)	1/63	0.736713	0.811852	0	0	0.7543331728454502	0.2304916106996307	USP15
Negative Regulation of TOR Signaling (GO:0032007)	1/63	0.736713	0.811852	0	0	0.7543331728454502	0.2304916106996307	UBE2N
Regulation of Cytokinesis (GO:0032465)	1/64	0.742245	0.814057	0	0	0.7423004027481639	0.2212615400450536	CDC6
Regulation of Endothelial Cell Migration (GO:0010594)	1/64	0.742245	0.814057	0	0	0.7423004027481639	0.2212615400450536	ETS1
Regulation of Epithelial Cell Proliferation (GO:0050678)	1/64	0.742245	0.814057	0	0	0.7423004027481639	0.2212615400450536	NME1
Wnt Signaling Pathway (GO:0016055)	1/64	0.742245	0.814057	0	0	0.7423004027481639	0.2212615400450536	ARL6
Cytoskeleton-Dependent Cytokinesis (GO:0061640)	1/64	0.742245	0.814057	0	0	0.7423004027481639	0.2212615400450536	ESPL1
Positive Regulation of Cell Adhesion (GO:0045785)	1/64	0.742245	0.814057	0	0	0.7423004027481639	0.2212615400450536	C1QBP
Cytokine-Mediated Signaling Pathway (GO:0019221)	2/126	0.74399	0.814678	0	0	0.753413072369216	0.22280507183231155	LYN;CHUK
Extracellular Matrix Organization (GO:0030198)	2/126	0.74399	0.814678	0	0	0.753413072369216	0.22280507183231155	DDX18;GPM6B
Positive Regulation of Signal Transduction (GO:0009967)	3/185	0.747132	0.815117	0	0	0.7692720813021565	0.2242536278221094	TEDC2;RAB34;UBE2N
Antigen Receptor-Mediated Signaling Pathway (GO:0050851)	1/65	0.747662	0.815117	0	0	0.730643656716418	0.2124745494451563	UBE2N
Autophagosome Assembly (GO:0000045)	1/65	0.747662	0.815117	0	0	0.730643656716418	0.2124745494451563	WDR45
Cell Morphogenesis Involved in Neuron Differentiation (GO:0048667)	1/65	0.747662	0.815117	0	0	0.730643656716418	0.2124745494451563	BRSK2
Sphingolipid Biosynthetic Process (GO:0030148)	1/65	0.747662	0.815117	0	0	0.730643656716418	0.2124745494451563	SMPD4
Regulation of Cell Cycle Process (GO:0010564)	2/127	0.747927	0.815117	0	0	0.7473258426966292	0.2170605007924197	TIPIN;MYBBP1A
Regulation of Gene Expression (GO:0010468)	15/825	0.749603	0.8163	0	0	0.8592884222805482	0.24765722639339063	LYN;ZNF143;DNMT1;SF3B3;TFRC;UTP4;NR3C1;ETS1;PTBP1;TFDP1;MYBBP1A;HNRNPF;WWC3;FAM98A;ATF4
Positive Regulation of Intracellular Signal Transduction (GO:1902533)	8/460	0.750977	0.817152	0	0	0.8235174448174143	0.23583944440018095	LYN;USP15;TFRC;DHX33;CHUK;SLC20A1;C1QBP;UBE2N
Positive Regulation of Organelle Organization (GO:0010638)	1/66	0.752965	0.818672	0	0	0.719345579793341	0.2041048514660631	SIVA1
Positive Regulation of Cold-Induced Thermogenesis (GO:0120162)	1/67	0.758157	0.822377	0	0	0.70838986883763	0.19612846235888434	FABP5
Epithelial Cell Differentiation (GO:0030855)	1/67	0.758157	0.822377	0	0	0.70838986883763	0.19612846235888434	PCNA
Positive Regulation of Macroautophagy (GO:0016239)	1/67	0.758157	0.822377	0	0	0.70838986883763	0.19612846235888434	WDR45
Positive Regulation of Developmental Process (GO:0051094)	3/190	0.763138	0.825947	0	0	0.7484017530457159	0.2023051978602754	TFRC;C1QBP;LLPH
Response to Insulin (GO:0032868)	1/68	0.76324	0.825947	0	0	0.6977611940298507	0.1885230532175084	TBC1D4
Protein Deubiquitination (GO:0016579)	1/68	0.76324	0.825947	0	0	0.6977611940298507	0.1885230532175084	USP15
Adenylate Cyclase-Activating G Protein-Coupled Receptor Signaling Pathway (GO:0007189)	1/69	0.768217	0.830034	0	0	0.6874451273046532	0.1812678156680693	LPAR3
Negative Regulation of Transforming Growth Factor Beta Receptor Signaling Pathway (GO:0030512)	1/69	0.768217	0.830034	0	0	0.6874451273046532	0.1812678156680693	USP15
Regulation of Osteoblast Differentiation (GO:0045667)	1/70	0.773089	0.832697	0	0	0.6774280770062729	0.17434333998408175	ATF4
Cellular Response to Peptide Hormone Stimulus (GO:0071375)	1/70	0.773089	0.832697	0	0	0.6774280770062729	0.17434333998408175	TBC1D4
Signal Transduction in Response to DNA Damage (GO:0042770)	1/70	0.773089	0.832697	0	0	0.6774280770062729	0.17434333998408175	LYN
Potassium Ion Transmembrane Transport (GO:0071805)	1/70	0.773089	0.832697	0	0	0.6774280770062729	0.17434333998408175	LETM1
Intracellular Monoatomic Cation Homeostasis (GO:0030003)	2/136	0.781079	0.840647	0	0	0.6966292134831461	0.1721228483424734	TFRC;ATP13A1
Negative Regulation of Inflammatory Response (GO:0050728)	1/72	0.78253	0.840901	0	0	0.6582404877023335	0.16141537467205508	LYN
Protein O-linked Glycosylation (GO:0006493)	1/72	0.78253	0.840901	0	0	0.6582404877023335	0.16141537467205508	B3GALT1
Phosphorylation (GO:0016310)	4/256	0.786902	0.84471	0	0	0.7393830488170111	0.17719399395927782	LYN;BRSK2;MAPK6;MAP4K3
Regulation of Small GTPase Mediated Signal Transduction (GO:0051056)	2/138	0.787907	0.84471	0	0	0.6862745098039216	0.1635904767103236	ARHGDIA;SPATA13
Regulation of Cellular Component Organization (GO:0051128)	2/138	0.787907	0.84471	0	0	0.6862745098039216	0.1635904767103236	HSPA8;TFRC
Negative Regulation of Protein Phosphorylation (GO:0001933)	1/74	0.79158	0.847334	0	0	0.640104273154774	0.14960789169118038	LYN
Positive Regulation of Canonical Wnt Signaling Pathway (GO:0090263)	1/74	0.79158	0.847334	0	0	0.640104273154774	0.14960789169118038	GID8
Regulation of Transcription Elongation by RNA Polymerase II (GO:0034243)	1/75	0.795963	0.851367	0	0	0.631403791851553	0.1440878233916878	NCBP1
Regulation of Autophagy (GO:0010506)	3/203	0.800937	0.855437	0	0	0.6990225563909774	0.15516452918035645	ATP6V0B;SLTM;EIF4E
Membrane Organization (GO:0061024)	2/142	0.801006	0.855437	0	0	0.6664526484751204	0.14787700956515043	HSPA8;USO1
Regulation of Inflammatory Response (GO:0050727)	2/143	0.804167	0.857136	0	0	0.66167290886392	0.14421048615740106	DHX9;ETS1
Aerobic Respiration (GO:0009060)	1/77	0.804456	0.857136	0	0	0.6146897093479968	0.13374985871192066	NDUFS3
Phosphatidylinositol Biosynthetic Process (GO:0006661)	1/77	0.804456	0.857136	0	0	0.6146897093479968	0.13374985871192066	PGAP2
Positive Regulation of Neuron Projection Development (GO:0010976)	1/78	0.808569	0.860855	0	0	0.6066582671060283	0.1289082702173327	LYN
Positive Regulation of Vasculature Development (GO:1904018)	1/79	0.812596	0.864477	0	0	0.5988327592805205	0.12427033843781791	ETS1
Regulation of Cell Differentiation (GO:0045595)	2/146	0.813384	0.864651	0	0	0.6477320016645859	0.1337899599586557	PTBP1;ATF4
Negative Regulation of Cell Migration (GO:0030336)	2/147	0.81637	0.866007	0	0	0.64321322484825	0.1304999626038742	DDX18;NAV3
Cellular Respiration (GO:0045333)	1/80	0.816539	0.866007	0	0	0.5912053655771774	0.11982592518700023	NDUFS3
Positive Regulation of Proteasomal Protein Catabolic Process (GO:1901800)	1/80	0.816539	0.866007	0	0	0.5912053655771774	0.11982592518700023	PSMC2
Regulation of Cell Cycle (GO:0051726)	4/269	0.817929	0.866817	0	0	0.7023709505161979	0.14116225480934963	BOP1;ETS1;DTL;IPO5
Mitotic Spindle Organization (GO:0007052)	1/82	0.824178	0.87277	0	0	0.5765155702966648	0.11148005035102414	WDR62
Response to Cytokine (GO:0034097)	1/84	0.8315	0.879851	0	0	0.5625337169573817	0.10380078108372195	MAP4K3
Negative Regulation of Developmental Process (GO:0051093)	1/85	0.835047	0.881475	0	0	0.5557924662402275	0.10019144148043499	TFRC
Calcium Ion Transport (GO:0006816)	1/85	0.835047	0.881475	0	0	0.5557924662402275	0.10019144148043499	LETM1
Fatty Acid Metabolic Process (GO:0006631)	1/85	0.835047	0.881475	0	0	0.5557924662402275	0.10019144148043499	SLC27A4
Protein Modification Process (GO:0036211)	7/450	0.835585	0.881475	0	0	0.7329536642944532	0.13165559289943735	LYN;NUS1;PPP1CC;BRSK2;PPM1D;MAPK6;MAP4K3
Transforming Growth Factor Beta Receptor Superfamily Signaling Pathway (GO:0141091)	1/87	0.841918	0.886803	0	0	0.5427802846233947	0.09339778511654892	USP15
Positive Regulation of Protein Localization (GO:1903829)	1/87	0.841918	0.886803	0	0	0.5427802846233947	0.09339778511654892	TFRC
Positive Regulation of Double-Strand Break Repair (GO:2000781)	1/89	0.848504	0.892381	0	0	0.530359565807327	0.08712788535270637	UBE2N
Negative Regulation of Canonical Wnt Signaling Pathway (GO:0090090)	1/89	0.848504	0.892381	0	0	0.530359565807327	0.08712788535270637	HECW1
Protein Modification by Small Protein Conjugation (GO:0032446)	4/285	0.850936	0.893697	0	0	0.6615188343517089	0.10678112295774507	COPS3;ARIH2;UBE2N;ZNF598
Positive Regulation of Angiogenesis (GO:0045766)	1/90	0.851693	0.893697	0	0	0.5243585443568674	0.08417453650050201	ETS1
Regulation of TORC1 Signaling (GO:1903432)	1/90	0.851693	0.893697	0	0	0.5243585443568674	0.08417453650050201	UBE2N
Adenylate Cyclase-Modulating G Protein-Coupled Receptor Signaling Pathway (GO:0007188)	1/91	0.854816	0.894936	0	0	0.5184908789386401	0.08133498773817492	LPAR3
Regulation of Neuron Apoptotic Process (GO:0043523)	1/91	0.854816	0.894936	0	0	0.5184908789386401	0.08133498773817492	ATF4
Positive Regulation of GTPase Activity (GO:0043547)	1/91	0.854816	0.894936	0	0	0.5184908789386401	0.08133498773817492	SLC27A4
Regulation of Macroautophagy (GO:0016241)	1/92	0.857874	0.897458	0	0	0.5127521731999344	0.07860414822237856	ATP6V0B
Neuron Projection Development (GO:0031175)	2/163	0.858654	0.897596	0	0	0.5785470025821761	0.08816404394923874	LYN;GPM6B
Axonogenesis (GO:0007409)	2/165	0.863266	0.898895	0	0	0.5713563567013625	0.08400772915762238	BRSK2;ANOS1
Endomembrane System Organization (GO:0010256)	2/165	0.863266	0.898895	0	0	0.5713563567013625	0.08400772915762238	SEC61A1;SMPD4
Negative Regulation of Transcription by RNA Polymerase II (GO:0000122)	8/525	0.863393	0.898895	0	0	0.7161267850923023	0.1051882710598026	C1QBP;WWC3;DDX20;ETF1;NR3C1;ATF4;THAP11;JAZF1
Circulatory System Development (GO:0072359)	1/94	0.863797	0.898895	0	0	0.5016450008024395	0.07344954979152724	MTHFD1
Cytoskeleton Organization (GO:0007010)	1/94	0.863797	0.898895	0	0	0.5016450008024395	0.07344954979152724	DIAPH1
Negative Regulation of MAPK Cascade (GO:0043409)	1/94	0.863797	0.898895	0	0	0.5016450008024395	0.07344954979152724	LYN
Regulation of Cytokine Production (GO:0001817)	1/95	0.866666	0.899849	0	0	0.4962686567164179	0.07101687778969906	LYN
Positive Regulation of Cell Projection Organization (GO:0031346)	1/95	0.866666	0.899849	0	0	0.4962686567164179	0.07101687778969906	LYN
Glycerophospholipid Biosynthetic Process (GO:0046474)	1/95	0.866666	0.899849	0	0	0.4962686567164179	0.07101687778969906	SELENOI
Regulation of Transforming Growth Factor Beta Receptor Signaling Pathway (GO:0017015)	1/96	0.869475	0.901412	0	0	0.49100549882168104	0.06867505976240842	USP15
Positive Regulation of Wnt Signaling Pathway (GO:0030177)	1/96	0.869475	0.901412	0	0	0.49100549882168104	0.06867505976240842	GID8
Regulation of MAPK Cascade (GO:0043408)	2/171	0.876289	0.907116	0	0	0.5508055758703987	0.07273922448362757	LYN;DHX33
Regulation of Canonical Wnt Signaling Pathway (GO:0060828)	2/171	0.876289	0.907116	0	0	0.5508055758703987	0.07273922448362757	HECW1;GID8
Endoplasmic Reticulum to Golgi Vesicle-Mediated Transport (GO:0006888)	1/99	0.877552	0.907744	0	0	0.4758604934511118	0.062156598987372774	USO1
Cellular Response to Oxygen-Containing Compound (GO:1901701)	3/241	0.883562	0.913278	0	0	0.5856131926454793	0.07249530096816907	PRDX3;LYN;VIM
Regulation of Protein Ubiquitination (GO:0031396)	1/102	0.885131	0.914216	0	0	0.46161519136988327	0.05632622510464272	U2AF2
Metal Ion Transport (GO:0030001)	1/105	0.892242	0.920874	0	0	0.4481917336394948	0.051101698158903926	LETM1
Regulation of Mitotic Cell Cycle (GO:0007346)	1/107	0.896738	0.924824	0	0	0.43966488313151225	0.04791978399891034	EIF4E
Heart Development (GO:0007507)	1/109	0.901047	0.927883	0	0	0.4314538419016031	0.04495673714907039	MTHFD1
Regulation of GTPase Activity (GO:0043087)	1/109	0.901047	0.927883	0	0	0.4314538419016031	0.04495673714907039	CRK
Protein Phosphorylation (GO:0006468)	4/317	0.901973	0.928146	0	0	0.5923443245524143	0.06111274392249684	LYN;BRSK2;MAPK6;MAP4K3
Protein Localization to Plasma Membrane (GO:0072659)	1/110	0.903133	0.928649	0	0	0.42746131726687664	0.04355192604201315	RAB34
Positive Regulation of Cell Migration (GO:0030335)	3/254	0.903888	0.928735	0	0	0.5546984992361381	0.05605187740093484	HSPA8;C1QBP;ETS1
Regulation of Protein Phosphorylation (GO:0001932)	1/111	0.905176	0.929368	0	0	0.4235413839891452	0.04219558979812702	LYN
+ Reg of Phosphatidylinositol 3-Kinase/Prot Kinase B Signal Transduction (GO:0051897)	1/113	0.909134	0.93263	0	0	0.41591151385927505	0.03962087474090576	C1QBP
Negative Regulation of DNA-templated Transcription (GO:0045892)	11/738	0.90997	0.93263	0	0	0.6960696501498139	0.06566984954253373	HSPA8;MYBBP1A;WDR82;C1QBP;WWC3;DDX20;ETF1;NR3C1;ATF4;THAP11;JAZF1
Protein Autophosphorylation (GO:0046777)	1/114	0.911051	0.93263	0	0	0.41219786025624094	0.03839896851349152	LYN
Protein Localization to Cell Periphery (GO:1990778)	1/114	0.911051	0.93263	0	0	0.41219786025624094	0.03839896851349152	RAB34
Plasma Membrane Bounded Cell Projection Organization (GO:0120036)	1/115	0.912927	0.93386	0	0	0.40854935847080387	0.03721847390379049	LYN
Anterograde Trans-Synaptic Signaling (GO:0098916)	1/116	0.914764	0.934357	0	0	0.40496430889033097	0.03607781491380517	LPAR3
Protein Maturation (GO:0051604)	1/116	0.914764	0.934357	0	0	0.40496430889033097	0.03607781491380517	NAA15
Proteolysis (GO:0006508)	2/196	0.919153	0.938147	0	0	0.4788601876520329	0.0403690649542196	DPP9;CAPN15
Brain Development (GO:0007420)	1/119	0.920047	0.938366	0	0	0.3945737414621806	0.032880097255357926	DHX37
Neuron Projection Morphogenesis (GO:0048812)	1/122	0.925003	0.942726	0	0	0.3846984087825336	0.029990356804648198	BRSK2
Axon Guidance (GO:0007411)	1/128	0.934016	0.951211	0	0	0.3663473968738982	0.025007446102095248	ANOS1
Neuron Development (GO:0048666)	1/129	0.93541	0.951929	0	0	0.3634561567164179	0.024268230303505427	LYN
Regulation of Cell Migration (GO:0030334)	4/354	0.941283	0.957202	0	0	0.5281293800539083	0.031957817632745605	HSPA8;NAV3;KIF26A;SPATA13
Positive Regulation of RNA Biosynthetic Process (GO:1902680)	5/424	0.945043	0.960319	0	0	0.5504176610978521	0.031112396932126037	SF3B3;PHF5A;NAA15;ETS1;ATF4
Supramolecular Fiber Organization (GO:0097435)	2/224	0.950483	0.965138	0	0	0.4175186422377434	0.021203730185647605	KATNB1;VIM
Positive Regulation of MAPK Cascade (GO:0043410)	2/229	0.954694	0.967672	0	0	0.4081572043755878	0.018924044970586116	LYN;DHX33
Negative Regulation of Macromolecule Biosynthetic Process (GO:0010558)	1/146	0.955077	0.967672	0	0	0.3204065877509007	0.014726825666329203	DNMT1
Macroautophagy (GO:0016236)	1/146	0.955077	0.967672	0	0	0.3204065877509007	0.014726825666329203	WDR45
Regulation of Angiogenesis (GO:0045765)	1/147	0.956027	0.967925	0	0	0.318186464935596	0.014308430257648793	ETS1
Negative Regulation of Intracellular Signal Transduction (GO:1902532)	2/234	0.958562	0.969445	0	0	0.39919927676611133	0.01689452515989392	LYN;WWC3
Chromatin Remodeling (GO:0006338)	2/235	0.959297	0.969445	0	0	0.3974538264937069	0.016516083999706735	USP15;MYBBP1A
Regulation of ERK1 and ERK2 Cascade (GO:0070372)	1/151	0.959632	0.969445	0	0	0.30960199004975125	0.01275742167240012	LYN
Small GTPase-mediated Signal Transduction (GO:0007264)	1/153	0.961322	0.970444	0	0	0.3054791830322074	0.012049997070946013	ARHGDIA
Regulation of Transcription by RNA Polymerase II (GO:0006357)	25/1616	0.962385	0.970808	0	0	0.7087124295473514	0.027172566399253927	DHX9;YWHAB;DDX20;PRDM14;NR3C1;PPM1D;ETS1;C1QBP;NKX1-2;WWC3;MYBL2;E2F4;JAZF1;TEAD4;ACTR3;ZNF143;CHUK;PPRC1;THAP11;TFDP1;SLTM;MYBBP1A;ETF1;CRK;ATF4
Negative Regulation of Cell Differentiation (GO:0045596)	1/157	0.964493	0.972226	0	0	0.29755070799846917	0.01075717555344671	PTBP1
Regulation of Phosphatidylinositol 3-Kinase/Protein Kinase B Signal Transduction (GO:0051896)	1/161	0.967406	0.973728	0	0	0.2900186567164179	0.00961044182539133	C1QBP
Chemical Synaptic Transmission (GO:0007268)	1/161	0.967406	0.973728	0	0	0.2900186567164179	0.00961044182539133	LPAR3
Protein Localization to Membrane (GO:0072657)	1/162	0.968096	0.973728	0	0	0.2881941225549272	0.009344466131230373	RAB34
Positive Regulation of Multicellular Organismal Process (GO:0051240)	2/256	0.972134	0.97708	0	0	0.3639741661505795	0.010286409502900072	FABP5;C1QBP
Inorganic Cation Transmembrane Transport (GO:0098662)	1/174	0.975325	0.978984	0	0	0.2679449572944526	0.006694566450906007	ATP6V0B
Nervous System Development (GO:0007399)	3/343	0.976355	0.978984	0	0	0.4065457762052189	0.009728224823073211	NAV3;WDR62;GPM6B
Positive Regulation of Cell Motility (GO:2000147)	1/176	0.97636	0.978984	0	0	0.26484008528784647	0.006336124187049152	HSPA8
Monoatomic Cation Transmembrane Transport (GO:0098655)	1/177	0.976861	0.978984	0	0	0.26331411126187243	0.006164505668806514	ATP6V0B
Negative Regulation of RNA Biosynthetic Process (GO:1902679)	3/354	0.980295	0.981714	0	0	0.393451577662104	0.007830545400703177	HSPA8;MYBBP1A;NR3C1
Central Nervous System Development (GO:0007417)	1/202	0.986464	0.987178	0	0	0.2300995024875622	0.003135945264969542	DHX37
Regulation of DNA-templated Transcription (GO:0006355)	22/1583	0.98865	0.98865	0	0	0.6296441344824635	0.007187377974618011	TEAD4;ZNF143;HSPA8;SF3B3;UTP4;DHX9;PRDM14;NR3C1;ETS1;THAP11;PHF5A;TFDP1;SLTM;MYBBP1A;NKX1-2;WWC3;POLR3G;ETF1;E2F4;NAA15;CRK;ATF4

## Sheet: GOCC_Downregulated_in_both
Term	Overlap	P-value	Adjusted P-value	Old P-value	Old Adjusted P-value	Odds Ratio	Combined Score	Genes
Nucleolus (GO:0005730)	42/693	3.89095e-10	6.45898e-08	0	0	3.39491	73.5582	FEN1;MRPS15;SF3B3;MCM7;DHX9;PAK1IP1;HEATR1;MCM10;PPM1D;NOP9;CLN6;PPP1CC;PTBP1;EMG1;DHX33;XPO6;EXOSC9;RRS1;DHX37;RRP36;UTP20;RRP12;LLPH;DDX18;UTP6;NOP14;UTP4;NOP16;DIMT1;IMP4;URB2;CDC6;BOP1;MYBBP1A;WDR82;GRWD1;POLR1B;XRN2;MCM3;CCDC86;NOL11;DTL
Nuclear Lumen (GO:0031981)	41/701	1.86413e-09	1.54723e-07	0	0	3.2521	65.3687	FEN1;MRPS15;SF3B3;MCM7;DHX9;PAK1IP1;HEATR1;MCM10;PPM1D;NOP9;CLN6;PPP1CC;PTBP1;EMG1;DHX33;XPO6;EXOSC9;RRS1;DHX37;RRP36;UTP20;RRP12;LLPH;DDX18;UTP6;NOP14;UTP4;NOP16;DIMT1;IMP4;URB2;CDC6;BOP1;MYBBP1A;WDR82;GRWD1;XRN2;MCM3;CCDC86;NOL11;DTL
Intracellular Membraneless Organelle (GO:0043232)	49/1059	8.9272e-08	4.93972e-06	0	0	2.55497	41.4712	FEN1;MRPS15;MCM7;PAK1IP1;MCM10;PPP1CC;PTBP1;RPS17;XPO6;ARHGDIA;RRP12;DDX18;DIMT1;IMP4;URB2;WDR82;GRWD1;POLR1B;XRN2;SPATA13;MCM3;CCDC86;DTL;SF3B3;DHX9;HEATR1;DDX20;KATNB1;PPM1D;NOP9;CLN6;EMG1;DHX33;EXOSC9;RRS1;DHX37;RRP36;UTP20;LLPH;UTP6;NOP14;UTP4;NOP16;CDC6;MLH1;BOP1;MYBBP1A;NOL11;VIM
CMG Complex (GO:0071162)	5/9	4.5309e-07	1.88032e-05	0	0	59.6212	870.897	MCM7;MCM3;MCM4;MCM5;MCM6
Small-Subunit Processome (GO:0032040)	10/70	1.77619e-06	5.89695e-05	0	0	8.06692	106.814	RPS17;EMG1;NOP14;UTP6;UTP4;DIMT1;HEATR1;DHX37;IMP4;UTP20
90S Preribosome (GO:0030686)	4/9	2.16842e-05	0.000514225	0	0	38.0106	408.193	NOP14;RRP36;UTP20;NOP9
Preribosome, Small Subunit Precursor (GO:0030688)	4/9	2.16842e-05	0.000514225	0	0	38.0106	408.193	LTV1;NOP14;UTP20;NOP9
Nuclear Chromosome (GO:0000228)	8/80	0.000259713	0.00538905	0	0	5.33163	44.0176	MCM7;EXOSC9;MCM3;RRS1;MCM4;MCM5;MCM6;NCAPD3
U2-type Spliceosomal Complex (GO:0005684)	8/87	0.000461728	0.00771793	0	0	4.85649	37.3005	SF3B3;PHF5A;DDX46;U2AF2;YJU2;PLRG1;TXNL4A;SNRPB
Nucleus (GO:0005634)	104/3754	0.000464936	0.00771793	0	0	1.54485	11.8546	LTV1;NR3C1;ETS1;IPO5;PPP1CC;NKX1-2;HMGN2;TXNL4A;TIPIN;IFRD2;GTF3A;DDX39A;PSME3;GRWD1;PSME4;XRN2;CCDC86;GEMIN5;ATF4;SNRPB;DNMT1;DHX9;PRDM14;WDR62;EMG1;HSPH1;DHX33;BAG1;LYN;HSPA8;DDIAS;DHCR24;CDC6;HNRNPM;DIAPH1;COPS3;ADI1;HNRNPF;UBE2N;FEN1;DDX49;DDX46;MCM7;YWHAB;MCM10;PTBP1;XPO6;C1QBP;ARIH2;RBPMS2;UFD1;MYBL2;LBR;TEAD4;ACTR3;NCBP1;PLRG1;PPRC1;NME1;SUPV3L1;PSMA3;TFDP1;SLTM;ESPL1;PSMA2;POLR1B;MCM3;MCM…
Chromosome (GO:0005694)	10/139	0.00067498	0.0101861	0	0	3.73141	27.2424	DDX18;BOP1;EMG1;UTP6;UTP4;POLR1B;EXOSC9;CCDC86;LLPH;MLH1
Mitochondrial Matrix (GO:0005759)	17/352	0.00119207	0.0154469	0	0	2.46905	16.6218	HSPA9;MRPS15;PNPT1;MARS2;TIMM44;NR3C1;POLRMT;MRPL32;MRPL11;ETNPPL;PRDX3;SUPV3L1;MTHFD1L;C1QBP;NDUFS3;ABCE1;MRRF
U2 snRNP (GO:0005686)	4/23	0.0012097	0.0154469	0	0	9.99166	67.1178	SF3B3;PHF5A;DDX46;SNRPB
Intracellular Membrane-Bounded Organelle (GO:0043231)	113/4284	0.00158459	0.0187888	0	0	1.46313	9.43344	LTV1;TFRC;NR3C1;ETS1;IPO5;PPP1CC;NKX1-2;HMGN2;TXNL4A;CADPS2;TIPIN;IFRD2;GTF3A;DDX39A;PSME3;GRWD1;PSME4;XRN2;CCDC86;GEMIN5;ATF4;SNRPB;DNMT1;DHX9;ARL6;PRDM14;WDR62;PRDX3;EMG1;HSPH1;DHX33;BAG1;PUSL1;LYN;HSPA8;NOP16;DDIAS;DHCR24;CDC6;HNRNPM;DIAPH1;COPS3;ADI1;HNRNPF;UBE2N;FEN1;DDX49;DDX46;MCM7;YWHAB;MCM10;RABEPK;PTBP1;XPO6;C1QBP;ARIH2;RBPMS2;UFD1;MYBL2;RRP12;LBR;TEAD4;ACTR3;NCBP1;PLRG1;PPRC1;NME1;SUPV…
Myofibril (GO:0030016)	3/16	0.00413741	0.0457874	0	0	10.9164	59.9059	MYH2;SCO1;PDE4DIP
Spliceosomal snRNP Complex (GO:0097525)	5/56	0.00616769	0.0603533	0	0	4.65872	23.7056	SF3B3;PHF5A;DDX46;TXNL4A;SNRPB
PTW/PP1 Phosphatase Complex (GO:0072357)	2/6	0.00618076	0.0603533	0	0	23.5805	119.938	PPP1CC;WDR82
U12-type Spliceosomal Complex (GO:0005689)	3/24	0.013224	0.121955	0	0	6.75349	29.2137	SF3B3;PHF5A;SNRPB
P-body (GO:0000932)	5/70	0.0154535	0.135015	0	0	3.65122	15.2253	YTHDF1;PSMA2;PSMC2;EIF4E;PNRC2
U2-type Precatalytic Spliceosome (GO:0071005)	4/47	0.0164879	0.13685	0	0	4.40649	18.0892	SF3B3;PHF5A;TXNL4A;SNRPB
Precatalytic Spliceosome (GO:0071011)	4/48	0.0176992	0.139908	0	0	4.306	17.3714	SF3B3;PHF5A;TXNL4A;SNRPB
RISC Complex (GO:0016442)	2/13	0.0291875	0.220233	0	0	8.56997	30.2864	DHX9;EIF4E
Mitochondrial Inner Membrane (GO:0005743)	13/350	0.0327374	0.235057	0	0	1.84726	6.31623	HSPA9;COA3;MRPS15;MCUB;TIMM44;MRPL32;MRPL11;LETM1;MRPL3;SCO1;MPC1;NDUFAF4;NDUFS3
Intracellular Organelle Lumen (GO:0070013)	22/695	0.034538	0.235057	0	0	1.57796	5.31093	KCMF1;HSPA9;HSPA8;MRPS15;PNPT1;MARS2;TIMM44;NR3C1;POLRMT;MRPL32;CLN6;ETNPPL;PRDX3;SUPV3L1;HSPH1;MTHFD1L;PSMA2;C1QBP;PSMC2;NDUFS3;ABCE1;MRRF
TIM23 Mitochondrial Import Inner Membrane Translocase Complex (GO:0005744)	2/15	0.0382322	0.235057	0	0	7.25036	23.6657	HSPA9;TIMM44
U2-type Prespliceosome (GO:0071004)	2/15	0.0382322	0.235057	0	0	7.25036	23.6657	U2AF2;SNRPB
Prespliceosome (GO:0071010)	2/15	0.0382322	0.235057	0	0	7.25036	23.6657	U2AF2;SNRPB
U5 snRNP (GO:0005682)	2/17	0.0481904	0.2857	0	0	6.28265	19.0527	TXNL4A;SNRPB
Proton-Transporting V-type ATPase, V0 Domain (GO:0033179)	1/4	0.0810598	0.410309	0	0	15.6629	39.3542	ATP6V0B
Uniplex Complex (GO:1990246)	1/4	0.0810598	0.410309	0	0	15.6629	39.3542	MCUB
Vacuolar Proton-Transporting V-type ATPase, V0 Domain (GO:0000220)	1/4	0.0810598	0.410309	0	0	15.6629	39.3542	ATP6V0B
Microbody Membrane (GO:0031903)	3/50	0.0865346	0.410309	0	0	3.01128	7.36923	SLC25A17;MGST1;GDAP1
Peroxisomal Membrane (GO:0005778)	3/50	0.0865346	0.410309	0	0	3.01128	7.36923	SLC25A17;MGST1;GDAP1
Golgi Stack (GO:0005795)	2/24	0.0889826	0.410309	0	0	4.28124	10.3577	RAB34;USO1
Supramolecular Fiber (GO:0099512)	2/24	0.0889826	0.410309	0	0	4.28124	10.3577	MYH2;CTPS1
Condensed Nuclear Chromosome (GO:0000794)	2/24	0.0889826	0.410309	0	0	4.28124	10.3577	RRS1;NCAPD3
HFE-transferrin Receptor Complex (GO:1990712)	1/5	0.10028	0.423354	0	0	11.7463	27.0139	TFRC
Muscle Myosin Complex (GO:0005859)	1/5	0.10028	0.423354	0	0	11.7463	27.0139	MYH2
Sec61 Translocon Complex (GO:0005784)	1/5	0.10028	0.423354	0	0	11.7463	27.0139	SEC61A1
Aggresome (GO:0016235)	2/26	0.102013	0.423354	0	0	3.92385	8.95678	XRN2;URB2
Mitochondrial Membrane (GO:0031966)	15/505	0.109127	0.439347	0	0	1.45902	3.23208	HSPA9;SLC22A3;COA3;MRPS15;MCUB;TIMM44;GDAP1;MRPL32;MRPL11;LETM1;MRPL3;SCO1;MPC1;NDUFAF4;NDUFS3
U2-type Catalytic Step 2 Spliceosome (GO:0071007)	2/28	0.115527	0.439347	0	0	3.62143	7.81595	PLRG1;SNRPB
U7 snRNP (GO:0005683)	1/6	0.1191	0.439347	0	0	9.39627	19.9933	SNRPB
Clathrin-Sculpted Gamma-Aminobutyric Acid Transport Vesicle (GO:0061200)	1/6	0.1191	0.439347	0	0	9.39627	19.9933	HSPA8
Clathrin-Sculpted Gamma-Aminobutyric Acid Transport Vesicle Membrane (GO:0061202)	1/6	0.1191	0.439347	0	0	9.39627	19.9933	HSPA8
Nuclear Membrane (GO:0031965)	7/199	0.124289	0.44852	0	0	1.72607	3.5991	NUP205;SMPD4;DHX37;NUTF2;PLRG1;LBR;IPO5
B-WICH Complex (GO:0110016)	1/7	0.137528	0.465911	0	0	7.8296	15.5334	MYBBP1A
Myosin Filament (GO:0032982)	1/7	0.137528	0.465911	0	0	7.8296	15.5334	MYH2
RISC-loading Complex (GO:0070578)	1/7	0.137528	0.465911	0	0	7.8296	15.5334	DHX9
Ficolin-1-Rich Granule (GO:0101002)	5/134	0.149627	0.483048	0	0	1.83037	3.47698	KCMF1;HSPA8;DIAPH1;PSMA2;PSMC2
RNA Polymerase I Complex (GO:0005736)	1/8	0.155571	0.483048	0	0	6.71055	12.486	POLR1B
U4 snRNP (GO:0005687)	1/8	0.155571	0.483048	0	0	6.71055	12.486	SNRPB
Condensed Chromosome, Centromeric Region (GO:0000779)	1/8	0.155571	0.483048	0	0	6.71055	12.486	NCAPD3
Ficolin-1-Rich Granule Lumen (GO:1904813)	4/100	0.157136	0.483048	0	0	1.96541	3.63727	KCMF1;HSPA8;PSMA2;PSMC2
U4/U6 X U5 tri-snRNP Complex (GO:0046540)	2/35	0.165781	0.491421	0	0	2.85166	5.1247	TXNL4A;SNRPB
Spliceosomal tri-snRNP Complex (GO:0097526)	2/35	0.165781	0.491421	0	0	2.85166	5.1247	TXNL4A;SNRPB
Cul5-RING Ubiquitin Ligase Complex (GO:0031466)	1/9	0.173239	0.494208	0	0	5.87127	10.2928	ARIH2
Nucleolar Exosome (RNase Complex) (GO:0101019)	1/9	0.173239	0.494208	0	0	5.87127	10.2928	EXOSC9
Small Ribosomal Subunit (GO:0015935)	2/38	0.188331	0.494208	0	0	2.6134	4.36321	RPS17;DHX29
Cytosolic Small Ribosomal Subunit (GO:0022627)	2/38	0.188331	0.494208	0	0	2.6134	4.36321	RPS17;DHX29
CD40 Receptor Complex (GO:0035631)	1/10	0.190538	0.494208	0	0	5.21849	8.65175	CHUK
MIB Complex (GO:0140275)	1/10	0.190538	0.494208	0	0	5.21849	8.65175	HSPA9
SAM Complex (GO:0001401)	1/10	0.190538	0.494208	0	0	5.21849	8.65175	HSPA9
U2-type Catalytic Step 1 Spliceosome (GO:0071006)	1/10	0.190538	0.494208	0	0	5.21849	8.65175	YJU2
Peroxisome (GO:0005777)	4/109	0.194224	0.496018	0	0	1.79565	2.94261	SLC25A17;MGST1;VIM;GDAP1
Cul4A-RING E3 Ubiquitin Ligase Complex (GO:0031464)	1/11	0.207477	0.514047	0	0	4.69627	7.38599	DTL
Proton-Transporting V-type ATPase Complex (GO:0033176)	1/11	0.207477	0.514047	0	0	4.69627	7.38599	ATP6V0B
Nuclear Outer Membrane (GO:0005640)	1/12	0.224062	0.531347	0	0	4.269	6.3857	SMPD4
Set1C/COMPASS Complex (GO:0048188)	1/12	0.224062	0.531347	0	0	4.269	6.3857	WDR82
Endocytic Vesicle Lumen (GO:0071682)	1/12	0.224062	0.531347	0	0	4.269	6.3857	HSPH1
Cytoplasmic Stress Granule (GO:0010494)	3/79	0.228842	0.535039	0	0	1.85793	2.73994	YTHDF1;RBPMS2;EIF4E
Cilium (GO:0005929)	8/285	0.247252	0.570054	0	0	1.36315	1.9048	CADPS2;TEDC2;MCM7;ARL6;TMEM237;PSME3;LPAR3;IFT57
RNA Polymerase II, Core Complex (GO:0005665)	1/14	0.256203	0.574725	0	0	3.61165	4.9183	POLR2B
Preribosome, Large Subunit Precursor (GO:0030687)	1/14	0.256203	0.574725	0	0	3.61165	4.9183	RRS1
RNA Polymerase III Complex (GO:0005666)	1/15	0.271772	0.588207	0	0	3.35341	4.3688	POLR3G
Polymeric Cytoskeletal Fiber (GO:0099513)	6/209	0.273007	0.588207	0	0	1.39276	1.80816	CCT2;DIAPH1;DPP9;TCP1;KATNB1;VIM
Cytoplasmic Vesicle Lumen (GO:0060205)	3/88	0.279482	0.588207	0	0	1.66002	2.11622	HSPA8;PSMA2;PSMC2
U1 snRNP (GO:0005685)	1/16	0.287016	0.588207	0	0	3.1296	3.90642	SNRPB
Brush Border Membrane (GO:0031526)	1/16	0.287016	0.588207	0	0	3.1296	3.90642	SLC20A2
Vacuolar Proton-Transporting V-type ATPase Complex (GO:0016471)	1/16	0.287016	0.588207	0	0	3.1296	3.90642	ATP6V0B
Endoribonuclease Complex (GO:1902555)	1/16	0.287016	0.588207	0	0	3.1296	3.90642	DHX9
Mitochondrial Outer Membrane Translocase Complex (GO:0005742)	1/17	0.301943	0.603886	0	0	2.93377	3.51324	HSPA9
Podosome (GO:0002102)	1/17	0.301943	0.603886	0	0	2.93377	3.51324	SPATA13
Condensed Chromosome (GO:0000793)	2/54	0.312186	0.616938	0	0	1.80697	2.1036	RRS1;NCAPD3
Cation-Transporting ATPase Complex (GO:0090533)	1/19	0.330869	0.64326	0	0	2.60738	2.88385	ATP6V0B
Mitochondrial Ribosome (GO:0005761)	1/20	0.344881	0.64326	0	0	2.46995	2.62941	MRPL32
Nuclear Inner Membrane (GO:0005637)	1/20	0.344881	0.64326	0	0	2.46995	2.62941	LBR
Pericentric Heterochromatin (GO:0005721)	1/20	0.344881	0.64326	0	0	2.46995	2.62941	NCAPD3
Cytoplasmic Side of Endoplasmic Reticulum Membrane (GO:0098554)	1/20	0.344881	0.64326	0	0	2.46995	2.62941	THADA
Mitochondrial Intermembrane Space (GO:0005758)	2/61	0.365712	0.674536	0	0	1.5917	1.6011	PRELID1;PNPT1
Heterotrimeric G-protein Complex (GO:0005834)	1/22	0.372033	0.678654	0	0	2.23436	2.20928	GNG12
Clathrin-Coated Vesicle Membrane (GO:0030665)	2/63	0.380729	0.685512	0	0	1.53926	1.48642	HSPA8;TFRC
SAGA Complex (GO:0000124)	1/23	0.385186	0.685512	0	0	2.13263	2.03459	SF3B3
Azurophil Granule Lumen (GO:0035578)	2/64	0.388181	0.685512	0	0	1.51432	1.43297	CCT2;FABP5
Microtubule (GO:0005874)	4/157	0.416869	0.728424	0	0	1.22757	1.07411	CCT2;DPP9;TCP1;KATNB1
Membrane Raft (GO:0045121)	3/114	0.427506	0.731608	0	0	1.26854	1.07799	LYN;GPM6B;CLN6
Azurophil Granule (GO:0042582)	3/114	0.427506	0.731608	0	0	1.26854	1.07799	CCT2;FABP5;MGST1
Vacuolar Lumen (GO:0005775)	3/115	0.433055	0.733543	0	0	1.25712	1.05207	HSPA8;CCT2;FABP5
Endocytic Vesicle Membrane (GO:0030666)	3/116	0.438586	0.735406	0	0	1.24589	1.02686	LYN;ATP6V0B;TFRC
Cul4-RING E3 Ubiquitin Ligase Complex (GO:0080008)	1/30	0.469882	0.779241	0	0	1.61696	1.22124	DTL
Phagocytic Vesicle (GO:0045335)	2/76	0.474117	0.779241	0	0	1.26754	0.945966	ATP6V0B;RAB34
Secretory Granule Lumen (GO:0034774)	5/218	0.480902	0.782644	0	0	1.10106	0.80608	CCT2;HSPA8;FABP5;PSMA2;PSMC2
Intermediate Filament (GO:0005882)	1/32	0.491871	0.785102	0	0	1.5124	1.0731	VIM
Golgi Cisterna (GO:0031985)	1/32	0.491871	0.785102	0	0	1.5124	1.0731	RAB34
Extrinsic Component of Cytoplasmic Side of Plasma Membrane (GO:0031234)	1/33	0.502522	0.786969	0	0	1.46502	1.0081	GNG12
Ficolin-1-Rich Granule Membrane (GO:0101003)	1/33	0.502522	0.786969	0	0	1.46502	1.0081	DIAPH1
SAGA-type Complex (GO:0070461)	1/36	0.533159	0.802868	0	0	1.33913	0.842223	SF3B3
Sarcolemma (GO:0042383)	1/36	0.533159	0.802868	0	0	1.33913	0.842223	SMPD4
Mitotic Spindle (GO:0072686)	3/134	0.533994	0.802868	0	0	1.07315	0.673262	DIAPH1;ESPL1;CDC6
Cation Channel Complex (GO:0034703)	1/37	0.542948	0.802868	0	0	1.30182	0.795078	MCUB
Phagocytic Vesicle Membrane (GO:0030670)	1/40	0.571104	0.802868	0	0	1.2014	0.673003	ATP6V0B
Extracellular Membrane-Bounded Organelle (GO:0065010)	1/41	0.5801	0.802868	0	0	1.17127	0.63782	TFRC
Focal Adhesion (GO:0005925)	7/345	0.585844	0.802868	0	0	0.968946	0.518097	HSPA9;ACTR3;PPP1CC;HSPA8;RPS17;YWHAB;VIM
Ribosome (GO:0005840)	1/42	0.588908	0.802868	0	0	1.14261	0.604995	RPS17
Calcium Channel Complex (GO:0034704)	1/42	0.588908	0.802868	0	0	1.14261	0.604995	MCUB
Spindle (GO:0005819)	4/197	0.593319	0.802868	0	0	0.970026	0.506376	DIAPH1;ESPL1;KATNB1;CDC6
Cytoplasmic Side of Plasma Membrane (GO:0009898)	2/95	0.594124	0.802868	0	0	1.00705	0.524336	LYN;CHUK
Azurophil Granule Membrane (GO:0035577)	1/43	0.597532	0.802868	0	0	1.11532	0.574329	MGST1
Coated Vesicle Membrane (GO:0030662)	1/43	0.597532	0.802868	0	0	1.11532	0.574329	USO1
Extracellular Vesicle (GO:1903561)	1/43	0.597532	0.802868	0	0	1.11532	0.574329	TFRC
Endocytic Vesicle (GO:0030139)	3/148	0.601536	0.802868	0	0	0.968447	0.492231	LYN;HSPH1;RAB34
Cell-Substrate Junction (GO:0030055)	7/351	0.604114	0.802868	0	0	0.95158	0.479589	HSPA9;ACTR3;PPP1CC;HSPA8;RPS17;YWHAB;VIM
ER to Golgi Transport Vesicle Membrane (GO:0012507)	1/44	0.605976	0.802868	0	0	1.08929	0.545643	USO1
Clathrin-Coated Endocytic Vesicle Membrane (GO:0030669)	1/44	0.605976	0.802868	0	0	1.08929	0.545643	TFRC
Filopodium (GO:0030175)	1/44	0.605976	0.802868	0	0	1.08929	0.545643	SPATA13
Microtubule Cytoskeleton (GO:0015630)	6/303	0.611126	0.802868	0	0	0.944732	0.465235	CCT2;ARL6;DPP9;TMEM237;TCP1;KATNB1
Transport Vesicle Membrane (GO:0030658)	1/45	0.614243	0.802868	0	0	1.06445	0.518776	USO1
Cytoplasmic Vesicle Membrane (GO:0030659)	6/312	0.639426	0.828024	0	0	0.916275	0.409744	LYN;DIAPH1;ATP6V0B;TFRC;FABP5;VOPP1
Endoplasmic Reticulum Membrane (GO:0005789)	13/667	0.643464	0.828024	0	0	0.927263	0.408819	NUS1;PGAP2;ATP13A1;MGST1;DHCR24;THADA;SELENOI;SEC61A1;SMPD4;CLPTM1L;EMC8;LBR;SLC27A4
SCF Ubiquitin Ligase Complex (GO:0019005)	1/51	0.660339	0.843202	0	0	0.936269	0.388553	TMEM183A
Clathrin-Coated Endocytic Vesicle (GO:0045334)	1/54	0.681286	0.863309	0	0	0.883061	0.338895	TFRC
cullin-RING Ubiquitin Ligase Complex (GO:0031461)	3/169	0.69013	0.866857	0	0	0.844506	0.313207	TMEM183A;ARIH2;DTL
Intermediate Filament Cytoskeleton (GO:0045111)	1/56	0.69453	0.866857	0	0	0.850814	0.310138	VIM
Vesicle Membrane (GO:0012506)	1/60	0.719396	0.87882	0	0	0.792879	0.261129	VOPP1
Golgi Membrane (GO:0000139)	7/395	0.723988	0.87882	0	0	0.840639	0.27151	ATP6V0B;PGAP2;CHSY1;UXS1;B3GALT1;USO1;HS3ST2
Actin Filament (GO:0005884)	1/61	0.725291	0.87882	0	0	0.779602	0.250394	DIAPH1
Actin-Based Cell Projection (GO:0098858)	1/61	0.725291	0.87882	0	0	0.779602	0.250394	SPATA13
Lysosomal Lumen (GO:0043202)	1/62	0.731063	0.878879	0	0	0.76676	0.240193	HSPA8
COPII-coated ER to Golgi Transport Vesicle (GO:0030134)	1/63	0.736713	0.878879	0	0	0.754333	0.230492	USO1
Cell Projection Membrane (GO:0031253)	1/65	0.747662	0.878879	0	0	0.730644	0.212475	SLC20A2
Secretory Granule Membrane (GO:0030667)	3/186	0.7504	0.878879	0	0	0.765007	0.219671	DIAPH1;FABP5;MGST1
Basolateral Plasma Membrane (GO:0016323)	2/128	0.751812	0.878879	0	0	0.741335	0.211479	SLC22A3;TFRC
Cytoskeleton (GO:0005856)	8/509	0.840359	0.969645	0	0	0.739976	0.128701	ACTR3;DHX9;ARL6;TMEM237;ARHGDIA;DDX20;KATNB1;VIM
Glutamatergic Synapse (GO:0098978)	1/87	0.841918	0.969645	0	0	0.54278	0.0933978	CADPS2
trans-Golgi Network Membrane (GO:0032588)	1/90	0.851693	0.969645	0	0	0.524359	0.0841745	RABEPK
Actin Cytoskeleton (GO:0015629)	4/286	0.852821	0.969645	0	0	0.659119	0.104936	ACTR3;DIAPH1;DHX9;SPATA13
Bounding Membrane of Organelle (GO:0098588)	11/693	0.864306	0.976019	0	0	0.744811	0.108615	LYN;DIAPH1;ATP6V0B;TFRC;PGAP2;FABP5;CHSY1;UXS1;B3GALT1;USO1;HS3ST2
Vesicle (GO:0031982)	2/172	0.878345	0.983364	0	0	0.547521	0.0710222	TFRC;RAB34
Tertiary Granule (GO:0070820)	1/101	0.882658	0.983364	0	0	0.466269	0.0581986	DIAPH1
Lysosomal Membrane (GO:0005765)	4/312	0.895174	0.990659	0	0	0.602205	0.0666865	LYN;HSPA8;ATP6V0B;MGST1
Early Endosome (GO:0005769)	3/258	0.909468	0.992489	0	0	0.54582	0.0517962	PRDX3;CLN6;NME1
Lytic Vacuole Membrane (GO:0098852)	3/261	0.913458	0.992489	0	0	0.539343	0.0488201	LYN;HSPA8;ATP6V0B
Asymmetric Synapse (GO:0032279)	1/116	0.914764	0.992489	0	0	0.404964	0.0360778	FABP5
trans-Golgi Network (GO:0005802)	2/205	0.930839	0.998304	0	0	0.457298	0.0327741	SMPD4;RABEPK
Recycling Endosome (GO:0055037)	1/134	0.941949	0.998304	0	0	0.349652	0.0209105	TFRC
Mitochondrial Outer Membrane (GO:0005741)	1/139	0.947829	0.998304	0	0	0.336848	0.0180486	GDAP1
Postsynaptic Density (GO:0014069)	1/140	0.948932	0.998304	0	0	0.334398	0.0175285	FABP5
Axon (GO:0030424)	1/161	0.967406	0.998304	0	0	0.290019	0.00961044	VIM
Late Endosome (GO:0005770)	1/166	0.970714	0.998304	0	0	0.281117	0.00835584	VOPP1
Lysosome (GO:0005764)	4/418	0.977184	0.998304	0	0	0.444153	0.0102511	LYN;HSPA8;ATP6V0B;VOPP1
Lytic Vacuole (GO:0000323)	1/185	0.980507	0.998304	0	0	0.251703	0.00495499	VOPP1
Endoplasmic Reticulum Lumen (GO:0005788)	1/206	0.987578	0.998304	0	0	0.225537	0.00281922	CLN6
Endosome Membrane (GO:0010008)	2/313	0.990295	0.998304	0	0	0.295892	0.00288562	ATP6V0B;TFRC
Collagen-Containing Extracellular Matrix (GO:0062023)	1/228	0.992258	0.998304	0	0	0.203317	0.00158024	HNRNPM
Cell-Cell Junction (GO:0005911)	1/249	0.995073	0.998304	0	0	0.185785	0.000917572	MYH2
Neuron Projection (GO:0043005)	2/404	0.998304	0.998304	0	0	0.227216	0.000385721	VIM;ATF4

## Sheet: GOMF_Downregulated_in_both
Term	Overlap	P-value	Adjusted P-value	Old P-value	Old Adjusted P-value	Odds Ratio	Combined Score	Genes
Ribosome Binding (GO:0043022)	14/86	2.57661e-09	7.5237e-07	0	0	9.54989	188.866	YTHDF1;DHX9;IFRD2;NME1;UNG;SEC61A1;DHX33;C1QBP;GEMIN5;ETF1;DHX29;NAA15;MRRF;ZNF598
Single-Stranded DNA Helicase Activity (GO:0017116)	6/20	2.39447e-06	0.000349592	0	0	20.503	265.357	MCM7;DHX9;MCM3;MCM4;MCM5;MCM6
DNA Replication Origin Binding (GO:0003688)	4/12	8.10609e-05	0.00658886	0	0	23.7509	223.741	DHX9;GRWD1;MCM10;CDC6
Single-Stranded DNA Binding (GO:0003697)	9/88	9.02583e-05	0.00658886	0	0	5.48457	51.0769	MCM7;DHX9;POLR1B;MCM3;MCM4;MCM10;MCM5;MCM6;MLH1
3'-5' DNA Helicase Activity (GO:0043138)	4/13	0.000115168	0.00672582	0	0	21.1103	191.452	MCM7;DHX9;MCM5;MCM6
snoRNA Binding (GO:0030515)	5/31	0.000419061	0.0195368	0	0	9.15647	71.2144	NOP14;UTP6;HEATR1;DHX37;IMP4
Nucleoside Triphosphate Diphosphatase Activity (GO:0047429)	3/8	0.000468348	0.0195368	0	0	28.4008	217.729	DUT;DHX9;DCTPP1
mRNA Binding (GO:0003729)	15/274	0.000656684	0.023969	0	0	2.81298	20.6144	YTHDF1;CLUH;NCBP1;DHX9;DDX20;HNRNPM;PTBP1;DDX39A;DHX33;C1QBP;PPP1R8;RBPMS2;GEMIN5;ETF1;EIF4E
3'-5' Exonuclease Activity (GO:0008408)	5/36	0.000853895	0.0277041	0	0	7.67656	54.2403	PNPT1;EXOSC9;XRN2;POLRMT;NME1
DNA-directed RNA Polymerase Activity (GO:0003899)	4/24	0.00142801	0.0416979	0	0	9.49132	62.1821	POLR2B;POLR1B;POLR3G;POLRMT
RNA 7-Methylguanosine Cap Binding (GO:0000340)	3/12	0.00172913	0.0459006	0	0	15.7732	100.32	NCBP1;GEMIN5;EIF4E
5'-3' RNA Polymerase Activity (GO:0034062)	4/26	0.0019443	0.0473114	0	0	8.6271	53.8577	POLR2B;POLR1B;POLR3G;POLRMT
Magnesium Ion Binding (GO:0000287)	9/135	0.00211038	0.0474024	0	0	3.42582	21.1061	BRSK2;FEN1;CDC123;DUT;PGP;DCTPP1;PRTFDC1;FARSB;NME1
Sodium:Phosphate Symporter Activity (GO:0005436)	2/4	0.00254186	0.0501671	0	0	47.1685	281.825	SLC20A2;SLC20A1
RNA Exonuclease Activity, Producing 5'-Phosphomonoesters (GO:0016896)	4/28	0.00257708	0.0501671	0	0	7.90692	47.1339	PNPT1;EXOSC9;XRN2;POLRMT
3'-5'-RNA Exonuclease Activity (GO:0000175)	4/29	0.00294092	0.0536718	0	0	7.59004	44.2426	PNPT1;EXOSC9;XRN2;POLRMT
3'-5' RNA Helicase Activity (GO:0034458)	2/5	0.00417802	0.0717636	0	0	31.4432	172.243	SUPV3L1;DHX9
RNA Cap Binding (GO:0000339)	3/18	0.00584576	0.0948312	0	0	9.4594	48.6406	NCBP1;GEMIN5;EIF4E
Double-Stranded RNA Binding (GO:0003725)	5/57	0.00664791	0.0998029	0	0	4.56876	22.9053	SUPV3L1;TFRC;DHX33;DHX9;VIM
Ribosomal Small Subunit Binding (GO:0043024)	3/19	0.00683581	0.0998029	0	0	8.86748	44.2095	DHX29;NME1;UNG
Single-Stranded RNA Binding (GO:0003727)	4/40	0.00946061	0.125568	0	0	5.26625	24.544	PTBP1;DHX9;U2AF2;HNRNPF
Exonuclease Activity (GO:0004527)	4/40	0.00946061	0.125568	0	0	5.26625	24.544	FEN1;EXOSC9;XRN2;NME1
rRNA Binding (GO:0019843)	4/41	0.0103148	0.130953	0	0	5.12351	23.4358	EMG1;RRS1;GTF3A;MRPL11
Phosphate Transmembrane Transporter Activity (GO:0005315)	2/8	0.0112228	0.136544	0	0	15.7179	70.5702	SLC20A2;SLC20A1
Poly-Pyrimidine Tract Binding (GO:0008187)	3/23	0.0117495	0.137234	0	0	7.09173	31.5153	PTBP1;PNPT1;U2AF2
Damaged DNA Binding (GO:0003684)	4/47	0.0164879	0.182983	0	0	4.40649	18.0892	FEN1;PCNA;POLR1B;UNG
Long-Chain Fatty Acid Transmembrane Transporter Activity (GO:0005324)	2/10	0.0175463	0.182983	0	0	11.7865	47.6518	FABP5;SLC27A4
Sequence-Specific mRNA Binding (GO:1990825)	2/10	0.0175463	0.182983	0	0	11.7865	47.6518	DHX9;ETF1
Pyrophosphatase Activity (GO:0016462)	4/49	0.0189645	0.190952	0	0	4.20998	16.6934	PPA1;DHX9;DHX29;DCTPP1
Ribosomal Large Subunit Binding (GO:0043023)	2/11	0.0211529	0.199246	0	0	10.4761	40.3955	DHX33;MRRF
Fatty Acid Transmembrane Transporter Activity (GO:0015245)	2/11	0.0211529	0.199246	0	0	10.4761	40.3955	FABP5;SLC27A4
5'-3' Exonuclease Activity (GO:0008409)	2/12	0.0250376	0.228468	0	0	9.42772	34.7635	FEN1;XRN2
Oxidoreductase Activity, Acting on the CH-CH Group of Donors, NAD or NADP as Acceptor (GO:0016628)	2/15	0.0382322	0.338297	0	0	7.25036	23.6657	DHCR24;LBR
Solute:Sodium Symporter Activity (GO:0015370)	2/17	0.0481904	0.41387	0	0	6.28265	19.0527	SLC20A2;SLC20A1
Virus Receptor Activity (GO:0001618)	2/19	0.0589714	0.451215	0	0	5.54263	15.6895	SLC20A2;SIVA1
ATP Binding (GO:0005524)	9/237	0.0614108	0.451215	0	0	1.87773	5.23919	HSPA8;CDC123;BRSK2;MTHFD1L;DHX9;MCM6;ABCE1;MAP4K3;NME1
Sulfatide Binding (GO:0120146)	1/3	0.0614303	0.451215	0	0	23.4963	65.5511	CLN6
MutLalpha Complex Binding (GO:0032405)	1/3	0.0614303	0.451215	0	0	23.4963	65.5511	PCNA
aminoacyl-tRNA Ligase Activity (GO:0004812)	2/20	0.0646439	0.451215	0	0	5.23429	14.336	MARS2;FARSB
Ephrin Receptor Binding (GO:0046875)	2/20	0.0646439	0.451215	0	0	5.23429	14.336	LYN;CRK
Nuclease Activity (GO:0004518)	3/45	0.0674908	0.451215	0	0	3.37111	9.08771	FEN1;XRN2;NME1
glucuronosyl-N-acetylgalactosaminyl-proteoglycan 4-beta-N-acetylgalactosaminyltransferase Activity (GO:0047238)	1/4	0.0810598	0.451215	0	0	15.6629	39.3542	CHSY1
5'-Flap Endonuclease Activity (GO:0017108)	1/4	0.0810598	0.451215	0	0	15.6629	39.3542	FEN1
MutSalpha Complex Binding (GO:0032407)	1/4	0.0810598	0.451215	0	0	15.6629	39.3542	MLH1
Chromo Shadow Domain Binding (GO:0070087)	1/4	0.0810598	0.451215	0	0	15.6629	39.3542	LBR
rDNA Binding (GO:0000182)	1/4	0.0810598	0.451215	0	0	15.6629	39.3542	DHX33
Protein Serine/Threonine Phosphatase Activity (GO:0004722)	3/52	0.0947218	0.451215	0	0	2.88791	6.80625	PPP1CC;CTDSPL;PPM1D
Inorganic Anion Transmembrane Transporter Activity (GO:0015103)	2/25	0.0954333	0.451215	0	0	4.09477	9.61996	SLC20A2;SLC20A1
Monocarboxylic Acid Transmembrane Transporter Activity (GO:0008028)	2/25	0.0954333	0.451215	0	0	4.09477	9.61996	MPC1;SLC27A4
Adenyl Ribonucleotide Binding (GO:0032559)	9/262	0.0993781	0.451215	0	0	1.68877	3.89906	HSPA8;CDC123;BRSK2;MTHFD1L;DHX9;MCM6;ABCE1;MAP4K3;NME1
DNA-binding Transcription Activator Activity, RNA Polymerase II-specific (GO:0001228)	7/188	0.0998616	0.451215	0	0	1.83259	4.22223	ZNF143;TFDP1;MYBL2;E2F4;NR3C1;ETS1;ATF4
Flap Endonuclease Activity (GO:0048256)	1/5	0.10028	0.451215	0	0	11.7463	27.0139	FEN1
snRNP Binding (GO:0070990)	1/5	0.10028	0.451215	0	0	11.7463	27.0139	SNRPB
Glycine Transmembrane Transporter Activity (GO:0015187)	1/5	0.10028	0.451215	0	0	11.7463	27.0139	SLC38A5
tRNA-specific Adenosine Deaminase Activity (GO:0008251)	1/5	0.10028	0.451215	0	0	11.7463	27.0139	ADAT3
Leucine Zipper Domain Binding (GO:0043522)	1/5	0.10028	0.451215	0	0	11.7463	27.0139	ATF4
MAP Kinase Kinase Kinase Kinase Activity (GO:0008349)	1/5	0.10028	0.451215	0	0	11.7463	27.0139	MAP4K3
U4 snRNA Binding (GO:0030621)	1/5	0.10028	0.451215	0	0	11.7463	27.0139	GEMIN5
[Heparan Sulfate]-Glucosamine 3-Sulfotransferase Activity (GO:0008467)	1/5	0.10028	0.451215	0	0	11.7463	27.0139	HS3ST2
Calcium:Monoatomic Cation Antiporter Activity (GO:0015368)	1/5	0.10028	0.451215	0	0	11.7463	27.0139	LETM1
siRNA Binding (GO:0035197)	1/5	0.10028	0.451215	0	0	11.7463	27.0139	DHX9
Sodium:Proton Antiporter Activity (GO:0015385)	1/6	0.1191	0.451215	0	0	9.39627	19.9933	SLC38A5
CDP-alcohol Phosphatidyltransferase Activity (GO:0017169)	1/6	0.1191	0.451215	0	0	9.39627	19.9933	SELENOI
Hydrolase Activity, Acting on Carbon-Nitrogen (But Not Peptide) Bonds, in Linear Amidines (GO:0016813)	1/6	0.1191	0.451215	0	0	9.39627	19.9933	DDAH1
Ubiquitin-Modified Histone Reader Activity (GO:0061649)	1/6	0.1191	0.451215	0	0	9.39627	19.9933	USP15
RNA Polymerase II CTD Heptapeptide Repeat Phosphatase Activity (GO:0008420)	1/6	0.1191	0.451215	0	0	9.39627	19.9933	CTDSPL
Monoamine Transmembrane Transporter Activity (GO:0008504)	1/6	0.1191	0.451215	0	0	9.39627	19.9933	SLC22A3
Nucleotide Transmembrane Transporter Activity (GO:0015215)	1/6	0.1191	0.451215	0	0	9.39627	19.9933	SLC25A17
Phosphatidic Acid Transfer Activity (GO:1990050)	1/6	0.1191	0.451215	0	0	9.39627	19.9933	PRELID1
Prenyl Diphosphate Synthase Activity (GO:0120531)	1/6	0.1191	0.451215	0	0	9.39627	19.9933	NUS1
Prenyltransferase Activity (GO:0004659)	1/6	0.1191	0.451215	0	0	9.39627	19.9933	NUS1
Estrogen Response Element Binding (GO:0034056)	1/6	0.1191	0.451215	0	0	9.39627	19.9933	NR3C1
Serine-Type Exopeptidase Activity (GO:0070008)	1/6	0.1191	0.451215	0	0	9.39627	19.9933	TPP2
Peptidase Activator Activity (GO:0016504)	2/29	0.122446	0.451215	0	0	3.48703	7.32305	PSME3;PSME4
Protein Phosphatase Inhibitor Activity (GO:0004864)	2/29	0.122446	0.451215	0	0	3.48703	7.32305	YWHAB;PPP1R8
Phosphatase Activity (GO:0016791)	3/59	0.125676	0.451215	0	0	2.52551	5.23803	PPP1CC;PGP;ENOPH1
Ubiquitin Protein Ligase Binding (GO:0031625)	8/239	0.128897	0.451215	0	0	1.64071	3.36139	HSPA9;CCT2;HSPA8;PSMA3;POLR1B;TCP1;BAG1;UBE2N
pre-mRNA Binding (GO:0036002)	2/30	0.129464	0.451215	0	0	3.36223	6.87358	PTBP1;U2AF2
Cysteine-Type Endopeptidase Activity (GO:0004197)	3/60	0.130365	0.451215	0	0	2.48101	5.05485	USP15;ESPL1;CAPN15
L-serine Transmembrane Transporter Activity (GO:0015194)	1/7	0.137528	0.451215	0	0	7.8296	15.5334	SLC38A5
N-acetyl-beta-D-glucosaminide Beta-(1,3)-Galactosyltransferase Activity (GO:0008499)	1/7	0.137528	0.451215	0	0	7.8296	15.5334	B3GALT1
NADH Dehydrogenase Activity (GO:0003954)	1/7	0.137528	0.451215	0	0	7.8296	15.5334	NDUFS3
U1 snRNA Binding (GO:0030619)	1/7	0.137528	0.451215	0	0	7.8296	15.5334	GEMIN5
Acetyltransferase Activator Activity (GO:0010698)	1/7	0.137528	0.451215	0	0	7.8296	15.5334	NAA15
Phosphorylation-Dependent Protein Binding (GO:0140031)	1/7	0.137528	0.451215	0	0	7.8296	15.5334	LYN
poly(G) Binding (GO:0034046)	1/7	0.137528	0.451215	0	0	7.8296	15.5334	PNPT1
Purine Nucleotide Transmembrane Transporter Activity (GO:0015216)	1/7	0.137528	0.451215	0	0	7.8296	15.5334	SLC25A17
Quaternary Ammonium Group Transmembrane Transporter Activity (GO:0015651)	1/7	0.137528	0.451215	0	0	7.8296	15.5334	SLC22A3
rRNA Methyltransferase Activity (GO:0008649)	1/7	0.137528	0.451215	0	0	7.8296	15.5334	EMG1
Basal RNA Polymerase II Transcription Machinery Binding (GO:0001099)	2/33	0.151034	0.46409	0	0	3.03612	5.73904	DHX9;LLPH
5S rRNA Binding (GO:0008097)	1/8	0.155571	0.46409	0	0	6.71055	12.486	RRS1
ADP Transmembrane Transporter Activity (GO:0015217)	1/8	0.155571	0.46409	0	0	6.71055	12.486	SLC25A17
Transferrin Receptor Binding (GO:1990459)	1/8	0.155571	0.46409	0	0	6.71055	12.486	CHUK
L-glutamine Transmembrane Transporter Activity (GO:0015186)	1/8	0.155571	0.46409	0	0	6.71055	12.486	SLC38A5
Aromatic Amino Acid Transmembrane Transporter Activity (GO:0015173)	1/8	0.155571	0.46409	0	0	6.71055	12.486	SLC38A5
Phosphoserine Residue Binding (GO:0050815)	1/8	0.155571	0.46409	0	0	6.71055	12.486	YWHAB
Regulatory RNA Binding (GO:0061980)	2/34	0.158375	0.46409	0	0	2.94101	5.41967	PNPT1;DHX9
Ubiquitin-Like Protein Ligase Binding (GO:0044389)	8/253	0.161259	0.46409	0	0	1.5452	2.8196	HSPA9;CCT2;HSPA8;PSMA3;POLR1B;TCP1;BAG1;UBE2N
Kinase Inhibitor Activity (GO:0019210)	2/35	0.165781	0.46409	0	0	2.85166	5.1247	YWHAB;PAK1IP1
Tau-Protein Kinase Activity (GO:0050321)	1/9	0.173239	0.46409	0	0	5.87127	10.2928	BRSK2
G-rich Strand Telomeric DNA Binding (GO:0098505)	1/9	0.173239	0.46409	0	0	5.87127	10.2928	POLR1B
Ubiquitin-Protein Transferase Activator Activity (GO:0097027)	1/9	0.173239	0.46409	0	0	5.87127	10.2928	UBE2N
LRR Domain Binding (GO:0030275)	1/9	0.173239	0.46409	0	0	5.87127	10.2928	ATF4
U3 snoRNA Binding (GO:0034511)	1/9	0.173239	0.46409	0	0	5.87127	10.2928	DHX37
Beta-1,3-Galactosyltransferase Activity (GO:0048531)	1/9	0.173239	0.46409	0	0	5.87127	10.2928	B3GALT1
Calcium-Dependent Cysteine-Type Endopeptidase Activity (GO:0004198)	1/9	0.173239	0.46409	0	0	5.87127	10.2928	CAPN15
Protein Serine/Threonine Phosphatase Inhibitor Activity (GO:0004865)	1/9	0.173239	0.46409	0	0	5.87127	10.2928	PPP1R8
Cysteine-Type Endopeptidase Inhibitor Activity Involved in Apoptotic Process (GO:0043027)	1/9	0.173239	0.46409	0	0	5.87127	10.2928	PRDX3
Endodeoxyribonuclease Activity, Producing 5'-Phosphomonoesters (GO:0016888)	1/9	0.173239	0.46409	0	0	5.87127	10.2928	FEN1
Heparan Sulfate Sulfotransferase Activity (GO:0034483)	1/10	0.190538	0.466025	0	0	5.21849	8.65175	HS3ST2
GDP-dissociation Inhibitor Activity (GO:0005092)	1/10	0.190538	0.466025	0	0	5.21849	8.65175	RANBP1
Long-Chain Fatty acid-CoA Ligase Activity (GO:0004467)	1/10	0.190538	0.466025	0	0	5.21849	8.65175	SLC27A4
Metal Cation:Proton Antiporter Activity (GO:0051139)	1/10	0.190538	0.466025	0	0	5.21849	8.65175	LETM1
Purine Ribonucleotide Transmembrane Transporter Activity (GO:0005346)	1/10	0.190538	0.466025	0	0	5.21849	8.65175	SLC25A17
Dipeptidyl-Peptidase Activity (GO:0008239)	1/10	0.190538	0.466025	0	0	5.21849	8.65175	DPP9
Metal Ion Binding (GO:0046872)	10/348	0.193976	0.466025	0	0	1.40024	2.29642	LETM1;FEN1;CDC123;BRSK2;DUT;PGP;DCTPP1;PRTFDC1;FARSB;NME1
Protein Phosphorylated Amino Acid Binding (GO:0045309)	2/39	0.19594	0.466025	0	0	2.54257	4.14424	YWHAB;CRK
Secondary Active Transmembrane Transporter Activity (GO:0015291)	2/39	0.19594	0.466025	0	0	2.54257	4.14424	SLC20A2;SLC20A1
Single-Stranded Telomeric DNA Binding (GO:0043047)	1/11	0.207477	0.466025	0	0	4.69627	7.38599	POLR1B
ATP Transmembrane Transporter Activity (GO:0005347)	1/11	0.207477	0.466025	0	0	4.69627	7.38599	SLC25A17
DNA Exonuclease Activity, Producing 5'-Phosphomonoesters (GO:0016895)	1/11	0.207477	0.466025	0	0	4.69627	7.38599	FEN1
GTPase Inhibitor Activity (GO:0005095)	1/11	0.207477	0.466025	0	0	4.69627	7.38599	IPO5
N6-methyladenosine-containing RNA Reader Activity (GO:1990247)	1/11	0.207477	0.466025	0	0	4.69627	7.38599	YTHDF1
RNA Stem-Loop Binding (GO:0035613)	1/11	0.207477	0.466025	0	0	4.69627	7.38599	DHX9
Acetylgalactosaminyltransferase Activity (GO:0008376)	1/11	0.207477	0.466025	0	0	4.69627	7.38599	CHSY1
Alanine Transmembrane Transporter Activity (GO:0022858)	1/11	0.207477	0.466025	0	0	4.69627	7.38599	SLC38A5
Basic Amino Acid Transmembrane Transporter Activity (GO:0015174)	1/11	0.207477	0.466025	0	0	4.69627	7.38599	SLC38A5
Calcium Channel Inhibitor Activity (GO:0019855)	1/11	0.207477	0.466025	0	0	4.69627	7.38599	MCUB
Protein Serine/Threonine Kinase Binding (GO:0120283)	1/11	0.207477	0.466025	0	0	4.69627	7.38599	CDC6
Pseudouridine Synthase Activity (GO:0009982)	1/11	0.207477	0.466025	0	0	4.69627	7.38599	PUSL1
snRNA Binding (GO:0017069)	2/41	0.211267	0.470917	0	0	2.41179	3.74945	SF3B3;GEMIN5
Exopeptidase Activity (GO:0008238)	2/42	0.218975	0.4844	0	0	2.35131	3.57116	DPP9;TPP2
Nucleoside Diphosphate Kinase Activity (GO:0004550)	1/12	0.224062	0.484638	0	0	4.269	6.3857	NME1
Nucleotidyltransferase Activity (GO:0016779)	1/12	0.224062	0.484638	0	0	4.269	6.3857	PNPT1
Oxidoreductase Activity, Acting on the CH-NH Group of Donors, NAD or NADP as Acceptor (GO:0016646)	1/12	0.224062	0.484638	0	0	4.269	6.3857	MTHFD1
NAD+ Binding (GO:0070403)	1/13	0.240302	0.497646	0	0	3.91294	5.5793	UXS1
NADPH Binding (GO:0070402)	1/13	0.240302	0.497646	0	0	3.91294	5.5793	LBR
RNA Exonuclease Activity (GO:0004532)	1/13	0.240302	0.497646	0	0	3.91294	5.5793	EXOSC9
Adenine Nucleotide Transmembrane Transporter Activity (GO:0000295)	1/13	0.240302	0.497646	0	0	3.91294	5.5793	SLC25A17
Adrenergic Receptor Binding (GO:0031690)	1/13	0.240302	0.497646	0	0	3.91294	5.5793	C1QBP
Phospholipid Scramblase Activity (GO:0017128)	1/13	0.240302	0.497646	0	0	3.91294	5.5793	CLPTM1L
Glucuronosyltransferase Activity (GO:0015020)	1/14	0.256203	0.51557	0	0	3.61165	4.9183	CHSY1
K48-linked Deubiquitinase Activity (GO:1990380)	1/14	0.256203	0.51557	0	0	3.61165	4.9183	USP15
MAP Kinase Activity (GO:0004707)	1/14	0.256203	0.51557	0	0	3.61165	4.9183	MAPK6
MHC Class II Protein Complex Binding (GO:0023026)	1/14	0.256203	0.51557	0	0	3.61165	4.9183	HSPA8
Receptor Tyrosine Kinase Binding (GO:0030971)	2/47	0.257785	0.51557	0	0	2.08922	2.83221	PCNA;CRK
Protein Kinase Inhibitor Activity (GO:0004860)	2/48	0.265573	0.527532	0	0	2.04364	2.7096	YWHAB;PAK1IP1
4 Iron, 4 Sulfur Cluster Binding (GO:0051539)	1/15	0.271772	0.532142	0	0	3.35341	4.3688	DPH2
Histone Acetyltransferase Binding (GO:0035035)	1/15	0.271772	0.532142	0	0	3.35341	4.3688	PCNA
RNA Nuclease Activity (GO:0004540)	2/49	0.27336	0.532142	0	0	2	2.59393	EXOSC9;PPP1R8
Glutathione Transferase Activity (GO:0004364)	1/16	0.287016	0.54777	0	0	3.1296	3.90642	MGST1
DNA Nuclease Activity (GO:0004536)	1/16	0.287016	0.54777	0	0	3.1296	3.90642	NME1
Ubiquitin-Modified Protein Reader Activity (GO:0140036)	1/16	0.287016	0.54777	0	0	3.1296	3.90642	USP15
Lysine-Acetylated Histone Binding (GO:0070577)	1/17	0.301943	0.565176	0	0	2.93377	3.51324	PSME4
TBP-class Protein Binding (GO:0017025)	1/17	0.301943	0.565176	0	0	2.93377	3.51324	NR3C1
UDP-galactosyltransferase Activity (GO:0035250)	1/17	0.301943	0.565176	0	0	2.93377	3.51324	B3GALT1
Transforming Growth Factor Beta Receptor Binding (GO:0005160)	1/18	0.316558	0.570587	0	0	2.76097	3.1758	USP15
DNA Polymerase Binding (GO:0070182)	1/18	0.316558	0.570587	0	0	2.76097	3.1758	PCNA
RNA Polymerase Binding (GO:0070063)	1/18	0.316558	0.570587	0	0	2.76097	3.1758	DHX9
Acetylation-Dependent Protein Binding (GO:0140033)	1/18	0.316558	0.570587	0	0	2.76097	3.1758	PSME4
Nucleobase-Containing Compound Kinase Activity (GO:0019205)	1/18	0.316558	0.570587	0	0	2.76097	3.1758	NME1
Phospholipid Transfer Activity (GO:0120014)	1/18	0.316558	0.570587	0	0	2.76097	3.1758	PRELID1
DNA-binding Transcription Factor Binding (GO:0140297)	6/223	0.32392	0.580274	0	0	1.30143	1.46705	TFDP1;DHX9;DDX20;ETS1;EIF4E;ATF4
Nuclear Localization Sequence Binding (GO:0008139)	1/19	0.330869	0.589108	0	0	2.60738	2.88385	IPO5
poly(U) RNA Binding (GO:0008266)	1/20	0.344881	0.606657	0	0	2.46995	2.62941	PNPT1
Endopeptidase Activator Activity (GO:0061133)	1/20	0.344881	0.606657	0	0	2.46995	2.62941	PSME3
Protein Tyrosine Kinase Binding (GO:1990782)	2/59	0.350559	0.612953	0	0	1.64781	1.72728	PCNA;CRK
Telomerase RNA Binding (GO:0070034)	1/21	0.3586	0.619272	0	0	2.34627	2.40621	SNRPB
Phosphatidylinositol-3,5-Bisphosphate Binding (GO:0080025)	1/21	0.3586	0.619272	0	0	2.34627	2.40621	WDR45
Sequence-Specific Double-Stranded DNA Binding (GO:1990837)	10/412	0.360535	0.619272	0	0	1.17117	1.19479	DHX33;DHX9;GRWD1;MCM10;MYBL2;CDC6;E2F4;NR3C1;ETS1;ATF4
N-methyltransferase Activity (GO:0008170)	1/22	0.372033	0.620764	0	0	2.23436	2.20928	DIMT1
SH2 Domain Binding (GO:0042169)	1/22	0.372033	0.620764	0	0	2.23436	2.20928	CRK
Acetyltransferase Activity (GO:0016407)	1/22	0.372033	0.620764	0	0	2.23436	2.20928	NAA15
Phosphotransferase Activity, Phosphate Group as Acceptor (GO:0016776)	1/22	0.372033	0.620764	0	0	2.23436	2.20928	NME1
Carboxy-Lyase Activity (GO:0016831)	1/22	0.372033	0.620764	0	0	2.23436	2.20928	UXS1
DNA Endonuclease Activity (GO:0004520)	1/23	0.385186	0.628348	0	0	2.13263	2.03459	FEN1
Tumor Necrosis Factor Receptor Superfamily Binding (GO:0032813)	1/23	0.385186	0.628348	0	0	2.13263	2.03459	SIVA1
RNA Endonuclease Activity, Producing 5'-Phosphomonoesters (GO:0016891)	1/23	0.385186	0.628348	0	0	2.13263	2.03459	FEN1
Mitogen-Activated Protein Kinase Binding (GO:0051019)	1/23	0.385186	0.628348	0	0	2.13263	2.03459	PPM1D
Histone Reader Activity (GO:0140566)	1/24	0.398065	0.631711	0	0	2.03975	1.87889	USP15
Ubiquitin Conjugating Enzyme Binding (GO:0031624)	1/24	0.398065	0.631711	0	0	2.03975	1.87889	ARIH2
NADP Binding (GO:0050661)	1/24	0.398065	0.631711	0	0	2.03975	1.87889	LBR
Non-Membrane Spanning Protein Tyrosine Kinase Activity (GO:0004715)	1/24	0.398065	0.631711	0	0	2.03975	1.87889	LYN
Aminopeptidase Activity (GO:0004177)	1/24	0.398065	0.631711	0	0	2.03975	1.87889	TPP2
Cadherin Binding (GO:0045296)	7/289	0.400676	0.632418	0	0	1.16667	1.06704	RANBP1;HSPA8;PUF60;YWHAB;USO1;DHX29;BZW1
Cysteine-Type Peptidase Activity (GO:0008234)	3/110	0.405127	0.636006	0	0	1.31639	1.18943	USP15;ESPL1;UFD1
Hsp90 Protein Binding (GO:0051879)	1/25	0.410674	0.637856	0	0	1.9546	1.73951	NR3C1
mRNA 3'-UTR AU-rich Region Binding (GO:0035925)	1/25	0.410674	0.637856	0	0	1.9546	1.73951	EXOSC9
NAD Binding (GO:0051287)	1/26	0.423021	0.653556	0	0	1.87627	1.61422	UXS1
Cysteine-Type Deubiquitinase Activity (GO:0004843)	2/70	0.43201	0.65582	0	0	1.38004	1.15828	USP15;UFD1
Ribonucleoside Triphosphate Phosphatase Activity (GO:0017111)	5/206	0.432053	0.65582	0	0	1.16793	0.980133	LSG1;DHX9;RAB34;DHX29;ABCE1
Sulfotransferase Activity (GO:0008146)	1/27	0.435109	0.65582	0	0	1.80396	1.50118	HS3ST2
GTP Binding (GO:0005525)	4/161	0.435615	0.65582	0	0	1.19591	0.993801	LSG1;ARL6;RAB34;NME1
General Transcription Initiation Factor Binding (GO:0140296)	1/28	0.446946	0.65582	0	0	1.73701	1.39884	NR3C1
Iron-Sulfur Cluster Binding (GO:0051536)	1/28	0.446946	0.65582	0	0	1.73701	1.39884	DPH2
Neutral L-amino Acid Transmembrane Transporter Activity (GO:0015175)	1/28	0.446946	0.65582	0	0	1.73701	1.39884	SLC38A5
Phosphatase Inhibitor Activity (GO:0019212)	1/28	0.446946	0.65582	0	0	1.73701	1.39884	YWHAB
Poly-Purine Tract Binding (GO:0070717)	1/28	0.446946	0.65582	0	0	1.73701	1.39884	PNPT1
Endopeptidase Regulator Activity (GO:0061135)	1/28	0.446946	0.65582	0	0	1.73701	1.39884	PSME3
Ubiquitin-Like Protein Peptidase Activity (GO:0019783)	1/29	0.458535	0.662833	0	0	1.67484	1.3059	USP15
miRNA Binding (GO:0035198)	1/29	0.458535	0.662833	0	0	1.67484	1.3059	PNPT1
RNA Polymerase II Complex Binding (GO:0000993)	1/29	0.458535	0.662833	0	0	1.67484	1.3059	DHX9
Ubiquitin Conjugating Enzyme Activity (GO:0061631)	1/30	0.469882	0.669296	0	0	1.61696	1.22124	UBE2N
Ubiquitin-Like Protein Conjugating Enzyme Binding (GO:0044390)	1/30	0.469882	0.669296	0	0	1.61696	1.22124	ARIH2
RNA Polymerase Core Enzyme Binding (GO:0043175)	1/30	0.469882	0.669296	0	0	1.61696	1.22124	DHX9
G Protein-Coupled Receptor Binding (GO:0001664)	2/77	0.480951	0.674302	0	0	1.25054	0.91538	HSPA8;C1QBP
Telomeric DNA Binding (GO:0042162)	1/31	0.480993	0.674302	0	0	1.56294	1.14392	POLR1B
Protein Kinase Binding (GO:0019901)	9/408	0.483067	0.674302	0	0	1.05816	0.769913	PRDX3;PPP1CC;TFRC;CDC6;WDR45;NR3C1;PPM1D;CRK;ATF4
Kinase Binding (GO:0019900)	8/363	0.490625	0.674302	0	0	1.05691	0.7526	PRDX3;PPP1CC;TFRC;WWC3;WDR45;NR3C1;CRK;ATF4
Phosphoric Diester Hydrolase Activity (GO:0008081)	1/32	0.491871	0.674302	0	0	1.5124	1.0731	SMPD4
Phosphotyrosine Residue Binding (GO:0001784)	1/32	0.491871	0.674302	0	0	1.5124	1.0731	CRK
Channel Activity (GO:0015267)	1/32	0.491871	0.674302	0	0	1.5124	1.0731	MCUB
Core Promoter Sequence-Specific DNA Binding (GO:0001046)	1/32	0.491871	0.674302	0	0	1.5124	1.0731	NR3C1
Protein Tyrosine Kinase Activity (GO:0004713)	2/79	0.494455	0.674677	0	0	1.21786	0.857738	LYN;SLTM
Ion Channel Inhibitor Activity (GO:0008200)	1/33	0.502522	0.680792	0	0	1.46502	1.0081	MCUB
Sequence-Specific DNA Binding (GO:0043565)	9/415	0.5036	0.680792	0	0	1.03931	0.712942	SLTM;MYBBP1A;POLR1B;MYBL2;ETF1;E2F4;NR3C1;POLRMT;ATF4
Guanyl Ribonucleotide Binding (GO:0032561)	4/177	0.508588	0.684368	0	0	1.08391	0.732851	LSG1;ARL6;RAB34;NME1
Deubiquitinase Activity (GO:0101005)	2/83	0.520787	0.691236	0	0	1.15735	0.755072	USP15;UFD1
Tau Protein Binding (GO:0048156)	1/35	0.523162	0.691236	0	0	1.37862	0.89316	BRSK2
Ubiquitin-Like Protein Conjugating Enzyme Activity (GO:0061650)	1/35	0.523162	0.691236	0	0	1.37862	0.89316	UBE2N
Calcium Channel Regulator Activity (GO:0005246)	1/35	0.523162	0.691236	0	0	1.37862	0.89316	MCUB
Phosphatidylinositol-3-Phosphate Binding (GO:0032266)	1/36	0.533159	0.701273	0	0	1.33913	0.842223	WDR45
Methyltransferase Activity (GO:0008168)	1/37	0.542948	0.704626	0	0	1.30182	0.795078	DNMT1
UDP-glycosyltransferase Activity (GO:0008194)	1/37	0.542948	0.704626	0	0	1.30182	0.795078	DDX18
Catalytic Activity, Acting on a tRNA (GO:0140101)	1/37	0.542948	0.704626	0	0	1.30182	0.795078	ETF1
mRNA 3'-UTR Binding (GO:0003730)	2/91	0.570639	0.731414	0	0	1.05264	0.590532	EXOSC9;GEMIN5
Transcription Corepressor Binding (GO:0001222)	1/40	0.571104	0.731414	0	0	1.2014	0.673003	ETS1
SH3 Domain Binding (GO:0017124)	1/40	0.571104	0.731414	0	0	1.2014	0.673003	CRK
Transmembrane Receptor Protein Tyrosine Kinase Activity (GO:0004714)	1/41	0.5801	0.736475	0	0	1.17127	0.63782	SLTM
Phosphoric Ester Hydrolase Activity (GO:0042578)	1/41	0.5801	0.736475	0	0	1.17127	0.63782	PPP1CC
Phosphatase Binding (GO:0019902)	2/94	0.588344	0.741212	0	0	1.01808	0.540032	SLTM;POLR1B
Syntaxin Binding (GO:0019905)	1/42	0.588908	0.741212	0	0	1.14261	0.604995	STXBP4
Protein Kinase Regulator Activity (GO:0019887)	2/95	0.594124	0.74218	0	0	1.00705	0.524336	YWHAB;PAK1IP1
DNA-binding Transcription Repressor Activity, RNA Polymerase II-specific (GO:0001227)	3/147	0.596929	0.74218	0	0	0.975251	0.503187	ETF1;NR3C1;THAP11
L-amino Acid Transmembrane Transporter Activity (GO:0015179)	1/43	0.597532	0.74218	0	0	1.11532	0.574329	SLC38A5
Protein Phosphatase Binding (GO:0019903)	2/96	0.599844	0.74218	0	0	0.996255	0.509171	SLTM;POLR1B
Flavin Adenine Dinucleotide Binding (GO:0050660)	1/45	0.614243	0.750455	0	0	1.06445	0.518776	MTO1
Manganese Ion Binding (GO:0030145)	1/45	0.614243	0.750455	0	0	1.06445	0.518776	FEN1
Monoatomic Ion Channel Activity (GO:0005216)	1/45	0.614243	0.750455	0	0	1.06445	0.518776	MCUB
Protein Heterodimerization Activity (GO:0046982)	3/152	0.619616	0.753867	0	0	0.942146	0.450963	CHUK;KATNB1;ATF4
Phospholipase Activity (GO:0004620)	1/46	0.622337	0.754035	0	0	1.04071	0.493583	SMPD4
PDZ Domain Binding (GO:0030165)	1/47	0.630262	0.757352	0	0	1.01801	0.469933	GNG12
S-adenosylmethionine-dependent Methyltransferase Activity (GO:0008757)	1/47	0.630262	0.757352	0	0	1.01801	0.469933	DNMT1
Endonuclease Activity (GO:0004519)	1/50	0.653057	0.781527	0	0	0.955452	0.40711	FEN1
Cytokine Receptor Binding (GO:0005126)	1/51	0.660339	0.781863	0	0	0.936269	0.388553	USP15
Transcription Cis-Regulatory Region Binding (GO:0000976)	7/371	0.661834	0.781863	0	0	0.897827	0.37057	TFDP1;XRN2;PRDM14;NR3C1;POLRMT;ETS1;ATF4
Calcium Ion Transmembrane Transporter Activity (GO:0015085)	1/52	0.66747	0.781863	0	0	0.917837	0.371046	SEC61A1
Carboxylic Acid Transmembrane Transporter Activity (GO:0046943)	1/52	0.66747	0.781863	0	0	0.917837	0.371046	SLC38A5
Polyubiquitin Modification-Dependent Protein Binding (GO:0031593)	1/52	0.66747	0.781863	0	0	0.917837	0.371046	UFD1
Ubiquitin-Protein Transferase Activity (GO:0004842)	6/322	0.669404	0.781863	0	0	0.886557	0.355836	KCMF1;HECW1;ARIH2;UBE2N;ZNF598;DTL
Acyltransferase Activity, Transferring Groups Other Than Amino-Acyl Groups (GO:0016747)	1/55	0.687978	0.800357	0	0	0.866639	0.324121	NAA15
Methylated Histone Binding (GO:0035064)	1/56	0.69453	0.804773	0	0	0.850814	0.310138	NCAPD3
RNA Polymerase II-specific DNA-binding Transcription Factor Binding (GO:0061629)	3/172	0.701502	0.809639	0	0	0.829314	0.294018	DHX9;ETS1;ATF4
Methylation-Dependent Protein Binding (GO:0140034)	1/58	0.707226	0.813032	0	0	0.82083	0.284339	NCAPD3
Small GTPase Binding (GO:0031267)	3/178	0.723293	0.828241	0	0	0.800494	0.259313	RANBP1;RAB34;NUTF2
Hexosyltransferase Activity (GO:0016758)	1/62	0.731063	0.833868	0	0	0.76676	0.240193	DDX18
ATPase Binding (GO:0051117)	1/64	0.742245	0.837816	0	0	0.7423	0.221262	BRSK2
Calcium Channel Activity (GO:0005262)	1/64	0.742245	0.837816	0	0	0.7423	0.221262	SEC61A1
Ubiquitin Protein Ligase Activity (GO:0061630)	4/240	0.743132	0.837816	0	0	0.790534	0.234696	KCMF1;HECW1;ARIH2;ZNF598
Endopeptidase Activity (GO:0004175)	3/185	0.747132	0.839086	0	0	0.769272	0.224254	USP15;ESPL1;TPP2
Carboxylic Ester Hydrolase Activity (GO:0052689)	1/66	0.752965	0.842397	0	0	0.719346	0.204105	ETF1
Protein Phosphatase Regulator Activity (GO:0019888)	1/67	0.758157	0.844969	0	0	0.70839	0.196128	YWHAB
Histone Deacetylase Binding (GO:0042826)	1/68	0.76324	0.8474	0	0	0.697761	0.188523	YWHAB
Protein Tyrosine Phosphatase Activity (GO:0004725)	1/70	0.773089	0.855084	0	0	0.677428	0.174343	PGP
Double-Stranded DNA Binding (GO:0003690)	6/364	0.777314	0.855335	0	0	0.779871	0.196458	FEN1;DHX9;MYBL2;E2F4;NR3C1;ATF4
Ubiquitin-Like Protein Ligase Activity (GO:0061659)	4/253	0.779175	0.855335	0	0	0.748473	0.186759	KCMF1;HECW1;ARIH2;ZNF598
Monoatomic Cation Channel Activity (GO:0005261)	1/73	0.787103	0.857111	0	0	0.649046	0.155379	SEC61A1
Protein Serine/Threonine Kinase Activity (GO:0004674)	5/313	0.787652	0.857111	0	0	0.755608	0.180363	BRSK2;CHUK;PPM1D;MAPK6;MAP4K3
Ubiquitin Binding (GO:0043130)	1/74	0.79158	0.857111	0	0	0.640104	0.149608	UBE2N
GTPase Activity (GO:0003924)	3/201	0.795469	0.857111	0	0	0.706197	0.161594	LSG1;RAB34;ABCE1
GTPase Binding (GO:0051020)	3/201	0.795469	0.857111	0	0	0.706197	0.161594	RANBP1;RAB34;NUTF2
Phosphatidylinositol Bisphosphate Binding (GO:1902936)	1/76	0.800254	0.857303	0	0	0.622935	0.138806	WDR45
Zinc Ion Binding (GO:0008270)	4/263	0.804097	0.857303	0	0	0.718992	0.156765	PHF5A;SIVA1;POLR1B;THAP11
Kinase Activity (GO:0016301)	1/77	0.804456	0.857303	0	0	0.61469	0.13375	LYN
Protein Homodimerization Activity (GO:0042803)	8/491	0.81093	0.86106	0	0	0.768695	0.161098	SUPV3L1;TFRC;MTHFD1L;CHUK;UXS1;RBPMS2;PRTFDC1;CLN6
Protease Binding (GO:0002020)	1/80	0.816539	0.863475	0	0	0.591205	0.119826	TNFRSF8
Microtubule Binding (GO:0008017)	3/210	0.819118	0.863475	0	0	0.675003	0.134681	NAV3;KIF26A;KATNB1
Transcription Coregulator Binding (GO:0001221)	1/83	0.827878	0.86957	0	0	0.569439	0.107561	ETS1
G Protein-Coupled Receptor Activity (GO:0004930)	1/87	0.841918	0.881147	0	0	0.54278	0.0933978	LPAR3
Phosphatidylinositol Phosphate Binding (GO:1901981)	1/88	0.845246	0.88147	0	0	0.536499	0.0902004	WDR45
Phosphatidylinositol Binding (GO:0035091)	1/93	0.860867	0.894566	0	0	0.507138	0.0759772	WDR45
Transition Metal Ion Binding (GO:0046914)	5/359	0.874644	0.90566	0	0	0.654961	0.087724	FEN1;PHF5A;SIVA1;POLR1B;THAP11
GTPase Activator Activity (GO:0005096)	2/175	0.884327	0.911446	0	0	0.537897	0.066123	RANBP1;TBC1D4
Anion Binding (GO:0043168)	4/306	0.886474	0.911446	0	0	0.61447	0.0740454	UXS1;WDR45;MTO1;LBR
Cis-Regulatory Region Sequence-Specific DNA Binding (GO:0000987)	10/692	0.919158	0.940074	0	0	0.674487	0.0568571	TEAD4;ZNF143;DHX9;NKX1-2;MYBL2;E2F4;NR3C1;ETS1;ATF4;THAP11
RNA Polymerase II Cis-Regulatory Region Sequence-Specific DNA Binding (GO:0000978)	10/694	0.920758	0.940074	0	0	0.672402	0.0555123	TEAD4;ZNF143;DHX9;NKX1-2;MYBL2;E2F4;NR3C1;ETS1;ATF4;THAP11
Tubulin Binding (GO:0015631)	3/270	0.924491	0.940597	0	0	0.520782	0.0408875	NAV3;KIF26A;KATNB1
RNA Polymerase II Transcription Regulatory Region Sequence-Specific DNA Binding (GO:0000977)	12/818	0.927775	0.940661	0	0	0.68301	0.0512023	TEAD4;ZNF143;TFDP1;DHX9;NKX1-2;PRDM14;MYBL2;E2F4;NR3C1;ETS1;ATF4;THAP11
GTPase Regulator Activity (GO:0030695)	4/361	0.946869	0.956699	0	0	0.517478	0.0282512	RANBP1;TBC1D4;SPATA13;IPO5
Receptor Ligand Activity (GO:0048018)	1/142	0.951068	0.957627	0	0	0.329602	0.0165359	HSPA8
Guanyl-Nucleotide Exchange Factor Activity (GO:0005085)	1/183	0.979653	0.982109	0	0	0.25451	0.005232	SPATA13
Calcium Ion Binding (GO:0005509)	1/189	0.982109	0.982109	0	0	0.246269	0.0044459	LETM1

## Sheet: GOBP_Downregulated_in_8p
Term	Overlap	P-value	Adjusted P-value	Old P-value	Old Adjusted P-value	Odds Ratio	Combined Score	Genes
Translation (GO:0006412)	59/208	9.76103e-22	2.56227e-18	0	0	5.678974984746797	274.74014587219807	MRPS16;MRPS10;MRPL36;MRPL37;RPL8;MRPL34;MRPL35;RPL6;RPS15;MRPL4;RPL18A;RPS19;RPL36;RPL35;RPS13;RPS12;EIF5AL1;MRPS26;RPL23;PABPC4;RPS5;MRPS23;MRPS18B;MRPL49;MRPS2;MRPL47;MRPS7;FTSJ1;MRPL43;MRPL44;TUFM;LARS2;MRPL50;MRPS9;MRPL51;RPL27;RPL26;AURKAIP1;RPL28;UBA52;MRPS35;MRPS34;MRPL14;MRPL12;GSPT1;RPS3;RPS2;RPS27A;ZC3H15;RPL19;ABCF1;GADD45GIP1;MRPL21;RPS26;RPS28;RPL27A;RPS6KB2;FAU;EIF4G1
Ribosome Biogenesis (GO:0042254)	48/148	1.321e-20	1.73382e-17	0	0	6.821626794258373	312.2484464388602	DDX27;RPS19BP1;WDR3;NOL7;NOLC1;NAT10;NOC4L;MALSU1;NOC2L;RPF2;WDR46;WDR43;MRM2;RRP9;NOL6;RPS15;FBL;EXOSC5;RPS19;NOB1;BMS1;PES1;RIOK1;EXOSC3;RPS27A;LYAR;RPS13;RPS12;PELP1;ABCF1;NOP56;NPM1;UTP11;PNO1;RPS5;WDR18;DDX10;WDR75;DDX54;UTP18;GTPBP4;BYSL;RCL1;EBNA1BP2;RPS28;TBL3;RPL27;RPL26
rRNA Processing (GO:0006364)	34/104	4.36578e-15	3.71879e-12	0	0	6.806285714285714	225.04969568562925	DDX27;WDR3;NOL7;NOLC1;NAT10;NOC4L;MRM2;RRP9;RPF1;NOL6;RPS15;FBL;SART1;EXOSC5;RPS19;NOB1;PES1;RIOK1;EXOSC3;LYAR;PELP1;NOP56;WDR18;DDX10;DDX54;BYSL;RCL1;EBNA1BP2;RPS28;NSA2;EIF6;TSR1;RPL27;RPL26
Ribosomal Small Subunit Biogenesis (GO:0042274)	30/82	5.66673e-15	3.71879e-12	0	0	8.05868312015853	264.35836249470645	RPS19BP1;WDR3;NOL7;NAT10;WDR46;WDR43;RRP9;NOL6;RPS15;FBL;NOB1;RPS19;BMS1;RIOK1;RPS27A;RPS13;RPS12;NOP56;NPM1;UTP11;PNO1;RPS5;WDR75;ERAL1;MRPS7;UTP18;RCL1;RPS28;TBL3;FAU
Ribonucleoprotein Complex Biogenesis (GO:0022613)	35/112	8.20856e-15	4.3095e-12	0	0	6.373273369739801	206.70818984740885	RPS19BP1;WDR3;NOL7;NAT10;MALSU1;NOC2L;RPF2;WDR46;WDR43;RRP9;NOL6;RPS15;FBL;RPS19;BMS1;PES1;RIOK1;RPS27A;RPS13;RPS12;ABCF1;NOP56;NPM1;UTP11;PNO1;RPS5;WDR75;UTP18;GTPBP4;BYSL;RCL1;EBNA1BP2;RPS28;TBL3;RPL26
Gene Expression (GO:0010467)	64/330	1.89537e-14	8.29225e-12	0	0	3.4373739226114064	108.60993563871207	MRPS16;EIF4A3;MRPL36;MRPL37;RPL8;MRPL34;PWP1;MRPL35;RPL6;RPS15;CHCHD4;RPL18A;RPS19;RPL36;RPL35;RPS13;RPS12;RPL23;PABPC4;RPS5;MRPS18B;DDX54;AEN;MRPS7;MRPL43;REXO4;AFG3L2;MRPL51;RPL27;RPL26;AURKAIP1;RPL28;UBA52;MRPS34;ISG20L2;MRPL12;GSPT1;CIAO1;HSPD1;EXOSC5;RPS3;NUP88;RPS2;EXOSC3;RPS27A;EXOSC1;RPL19;ABCF1;ALYREF;UBAC1;HNRNPL;RPS26;XAB2;PPP5C;RPS28;SNRNP40;HNRNPK;RPL27A;RPS6KB2;RNPS1;CALR;FAU;EIF4G1…
mRNA Splicing, via Spliceosome (GO:0000398)	46/198	1.20689e-13	4.52583e-11	0	0	4.2718722522296195	127.06923396483145	SF3B4;SF3B5;SF3B2;TSSC4;DDX1;EIF4A3;DDX23;PRPF19;USP39;ESS2;PRPF8;PQBP1;EFTUD2;SART1;SART3;SNRNP70;DHX38;SNRPB2;RBM10;CTNNBL1;SF3A3;PRMT5;RBM17;SF3A1;PRMT7;BUD31;LSM3;WDR77;XAB2;LSM7;SNRNP40;HNRNPK;GEMIN4;SNRPG;RBM42;RNPS1;GEMIN6;SNRPE;SRSF4;BUD13;PABPC1;SNRPF;GEMIN8;SNRNP200;SNRPC;SRSF9
Macromolecule Biosynthetic Process (GO:0009059)	42/172	2.37261e-13	7.78512e-11	0	0	4.54725013703636	132.18681889013232	ALAS1;MRPS16;MRPS34;MRPL36;MRPL37;RPL8;MRPL12;MRPL34;MRPL35;RPL6;GSPT1;RPS15;RPL18A;RPS19;RPL36;RPS3;RPL35;RPS2;RPS27A;RPS13;RPS12;ABCF1;RPL19;EIF5AL1;RPL23;RPS5;PABPC4;MRPS18B;MRPS7;MRPL43;TUFM;RPS26;RPS28;MRPL51;RPL27A;RPS6KB2;RPL27;RPL26;FAU;RPL28;UBA52;EIF4G1
RNA Processing (GO:0006396)	54/267	3.85153e-13	1.12336e-10	0	0	3.5945019514678433	102.7493248633165	POP7;USP39;TSEN54;RRP9;RPS15;FBL;RPS19;NOB1;KHSRP;PELP1;PRMT1;PABPC4;DDX10;DDX54;AEN;REXO4;EBNA1BP2;SNRPG;RPL27;SRSF4;RPL26;SNRPF;SRSF9;SF3B4;SF3B2;DDX27;CSTF3;DDX23;ISG20L2;NOLC1;NOC4L;PRPF8;MRM2;NOL6;TBRG4;EXOSC5;PES1;EXOSC3;LYAR;EXOSC1;SF3A3;NOP56;SF3A1;SSB;WDR18;LSM3;BYSL;HNRNPL;RPS28;SNRNP40;HNRNPK;RNPS1;TARDBP;INTS8
protein-RNA Complex Assembly (GO:0022618)	35/129	8.90546e-13	2.33768e-10	0	0	5.213204520963336	144.65048411874355	HSP90AB1;TSSC4;DDX1;DDX23;PRPF19;USP39;RPS15;SART1;SART3;RPS19;EIF4H;BRIX1;PRMT5;HSP90AA1;PRMT7;RPS5;ERAL1;MRPS7;WDR77;XAB2;RPS28;EIF6;EIF3I;GEMIN4;SNRPG;GEMIN6;SNRPE;SNRPF;FAU;GEMIN8;SNRNP200;SNRPC;EIF3D;SRSF9;EIF3B
Cytoplasmic Translation (GO:0002181)	29/98	7.7081e-12	1.83943e-09	0	0	5.855547080261039	149.83612996870394	RPL8;RPL6;RPS15;RPL18A;RPS19;RPL36;RPS3;RPL35;RPS2;EIF2B1;RPS27A;RPS13;ZC3H15;RPS12;RPL19;EIF2B4;EIF2B2;RPL23;RPS5;FTSJ1;RPS26;RPS28;RPL27A;EIF3I;RPL27;RPL26;FAU;RPL28;UBA52
Mitochondrial Gene Expression (GO:0140053)	28/96	2.60439e-11	5.69711e-09	0	0	5.730552501374381	139.6606453058086	MRPS16;MRPS35;MRPS34;MRPS10;MRPL14;MRPL36;MRPL37;MRPL12;MRPL34;MRPL35;TBRG4;MRPL4;GADD45GIP1;MRPS26;MRPS23;TWNK;MRPS18B;MRPL49;MRPS2;MRPL47;MRPS7;MRPL21;MRPL43;MRPL44;LARS2;MRPL50;MRPS9;MRPL51
Mitochondrial Translation (GO:0032543)	27/90	2.85914e-11	5.77326e-09	0	0	5.959993332222037	144.69621775985652	MRPS16;MRPS35;MRPS34;MRPS10;MRPL36;MRPL14;MRPL37;MRPL34;MRPL12;MRPL35;MRPL4;GADD45GIP1;MRPS26;MRPS23;MRPL49;MRPS18B;MRPS2;MRPL47;MRPS7;MRPL43;MRPL21;MRPL44;TUFM;LARS2;MRPL50;MRPS9;MRPL51
RNA Splicing, via Transesterification Reactions With Bulged Adenosine as Nucleophile (GO:0000377)	36/161	1.834e-10	3.43876e-08	0	0	4.026566037735849	90.2729893421323	SF3B4;SF3B5;SF3B2;EIF4A3;DDX23;PRPF19;USP39;ESS2;PRPF8;EFTUD2;SART1;SART3;SNRNP70;DHX38;SNRPB2;RBM10;CTNNBL1;SF3A3;SF3A1;BUD31;LSM3;XAB2;LSM7;SNRNP40;HNRNPK;SNRPG;RBM42;GEMIN6;SNRPE;SRSF4;RNPS1;BUD13;SNRPF;PABPC1;SNRNP200;SNRPC
Proton Motive Force-Driven ATP Synthesis (GO:0015986)	19/52	5.78142e-10	1.01175e-07	0	0	7.952776318094237	169.16510722509662	NDUFB9;NDUFA8;NDUFB7;NDUFA11;NDUFB10;NDUFB6;NDUFB11;ATP5PB;ATP5MC3;SDHD;ATP5F1C;SDHB;ATP5F1D;ATP5MC1;ATP5F1B;NDUFS6;NDUFS1;ATP5MF;ATP5ME
rRNA Metabolic Process (GO:0016072)	25/89	7.33232e-10	1.20296e-07	0	0	5.419182916181606	113.98470459354728	DDX27;NOLC1;NOC4L;MRM2;RRP9;NOL6;RPS15;FBL;EXOSC5;RPS19;NOB1;MYC;PES1;EXOSC3;LYAR;PELP1;NOP56;WDR18;DDX10;DDX54;BYSL;EBNA1BP2;RPS28;RPL27;RPL26
Proteasomal Protein Catabolic Process (GO:0010498)	52/310	1.44583e-09	2.23254e-07	0	0	2.839874031007752	57.80444379253224	CCDC47;PRPF19;PSMD8;PSMD6;UCHL1;PSMD7;MAEA;PSMD4;TRIM28;PSMD2;PSMD3;PSMD1;SEC61B;TRIM21;FBXW5;AXIN1;RNF41;PSMA5;RNF126;PSMA4;CANX;VCP;PSMD11;PSMD14;PSMD13;AMBRA1;UBE2J2;DTX4;PSMA7;USP19;ECPAS;HSP90B1;PCNP;PSMB6;PSMB7;PSMB4;PSMB5;PSMB2;PSMB3;PSMB1;TBL1X;KLHDC3;HSPA5;SEM1;PSMC5;PSMC6;PSMC3;PSMC4;PSMC1;CALR;SPSB4;RNF187
Oxidative Phosphorylation (GO:0006119)	19/56	2.4709e-09	3.6034e-07	0	0	7.090642087173879	140.5271815724907	NDUFB9;NDUFA8;NDUFB7;NDUFA11;NDUFB10;NDUFB6;NDUFB11;ATP5PB;CHCHD10;SDHD;ATP5F1C;SDHB;ATP5F1D;ATP5F1B;NDUFS6;UQCRC1;NDUFS1;ATP5MF;ATP5ME
Spliceosomal snRNP Assembly (GO:0000387)	15/36	4.53768e-09	6.26916e-07	0	0	9.830675653460464	188.85563721189715	PRMT5;TSSC4;PRMT7;PRPF19;PRPF8;WDR77;SART1;SART3;GEMIN4;SNRPG;GEMIN6;SNRPE;SNRPF;GEMIN8;SNRPC
Proton Motive Force-Driven Mitochondrial ATP Synthesis (GO:0042776)	17/48	8.13417e-09	1.06761e-06	0	0	7.558507273877293	140.79376313553124	NDUFB9;NDUFA8;NDUFB7;NDUFA11;NDUFB10;NDUFB6;NDUFB11;ATP5PB;SDHD;ATP5F1C;SDHB;ATP5F1D;ATP5F1B;NDUFS6;NDUFS1;ATP5MF;ATP5ME
mRNA Processing (GO:0006397)	39/212	1.25993e-08	1.57491e-06	0	0	3.1502000889284125	57.30095422464415	SF3B4;SF3B5;SF3B2;EIF4A3;DDX23;PRPF19;USP39;ESS2;PRPF8;TBRG4;EFTUD2;SART1;SART3;SNRNP70;PAPOLA;DHX38;SNRPB2;RBM10;CTNNBL1;SF3A3;SF3A1;BUD31;LSM3;XAB2;LSM7;SNRNP40;HNRNPK;SNRPG;RBM42;RNPS1;GEMIN6;SNRPE;SRSF4;BUD13;PABPC1;SNRPF;SNRNP200;SNRPC;SRSF9
Proteasome-Mediated Ubiquitin-Dependent Protein Catabolic Process (GO:0043161)	46/280	2.51986e-08	3.00665e-06	0	0	2.755655508638802	48.21426938725871	RNF10;VCP;PSMD11;PSMD14;PSMD13;CCNF;CUL2;AMBRA1;DTX4;PSMA7;CDC20;PSMD8;PCNP;PSMB6;PSMB7;PSMD6;UCHL1;PSMB4;PSMD7;PSMB5;MAEA;PSMD4;TRIM28;PSMB2;PSMB3;PSMD2;PSMD3;PSMB1;PSMD1;TBL1X;KLHDC3;FBXW5;ANAPC7;AXIN1;PSMA5;SEM1;RNF126;PSMC5;PSMA4;PSMC6;PSMC3;PSMC4;PSMC1;FBXL6;SPSB4;RNF187
ATP Biosynthetic Process (GO:0006754)	10/18	5.88138e-08	6.71245e-06	0	0	17.123855835240274	285.0931691326381	ATP5F1B;ATP5PB;ATP5MC3;PRKAG2;ATP5F1C;ATP5F1D;ATP5MF;ATP5MC1;ATP5ME;SLC25A13
Mitochondrial ATP Synthesis Coupled Electron Transport (GO:0042775)	18/61	7.68153e-08	8.40167e-06	0	0	5.770556957946184	94.53246795205708	COX8A;NDUFB9;NDUFA8;NDUFB7;NDUFB10;NDUFB6;COX4I1;SDHD;SDHB;COX5A;COX6B1;NDUFS6;UQCRQ;UQCRC1;UQCRFS1;CYCS;NDUFS1;COA6
Protein Targeting to Mitochondrion (GO:0006626)	17/57	1.48482e-07	1.55906e-05	0	0	5.85343137254902	92.03232837463234	TOMM70;BCAP31;MTCH2;HSP90AA1;TOMM40;HSPA4;TOMM34;TIMM13;TIMM21;TOMM40L;TOMM22;HSPD1;TIMM50;CHCHD4;TIMM17A;PMPCA;AURKAIP1
Aerobic Electron Transport Chain (GO:0019646)	17/60	3.38396e-07	3.4165e-05	0	0	5.443684450524396	81.10571616638066	COX8A;NDUFB9;NDUFA8;NDUFB7;NDUFB10;NDUFB6;COX4I1;SDHD;SDHB;COX5A;COX6B1;NDUFS6;UQCRQ;UQCRC1;UQCRFS1;CYCS;NDUFS1
Protein Metabolic Process (GO:0019538)	60/449	4.50995e-07	4.38468e-05	0	0	2.169865475328824	31.705660354727094	MRPS16;MRPL36;MRPL37;IDE;RPL8;MRPL34;MRPL35;RPL6;CNDP2;RPS15;CHCHD4;UCHL1;RPL18A;RPS19;RPL36;CPNE1;RPL35;SEPHS1;CTSD;RPS13;RPS12;RPL23;RPS5;PABPC4;MRPS18B;MRPS7;MRPL43;AFG3L2;MRPL51;RPL27;RPL26;AURKAIP1;RPL28;UBA52;PIGH;MRPS34;MRPL12;GSPT1;CIAO1;HSPD1;PSMB5;RPS3;RPS2;TBL1X;RPS27A;RPL19;ABCF1;ST14;UBAC1;RPS26;RPS28;SPCS1;PSMC4;RPL27A;RPS6KB2;CALR;FAU;TARDBP;EIF4G1;FBXL6
Ribosomal Small Subunit Assembly (GO:0000028)	8/14	9.96605e-07	9.34317e-05	0	0	18.226788432267885	251.87437713152858	RPS15;RPS28;RPS19;RPS5;FAU;MRPS7;MCAT;RCC1L
Cellular Respiration (GO:0045333)	19/80	1.39427e-06	0.000126205	0	0	4.292239173694684	57.87287222188371	COX8A;NDUFB9;NDUFA8;NDUFB7;NDUFA11;NDUFB10;NDUFB6;NDUFB11;COX4I1;SDHB;COX5A;COX6B1;NDUFS6;UQCRQ;UQCRC1;UQCRFS1;CYCS;NDUFS1;SLC25A13
Establishment of Protein Localization to Mitochondrion (GO:0072655)	13/42	2.73795e-06	0.00023957	0	0	6.151312403499743	78.78786581012771	BCAP31;TOMM70;TOMM40;TIMM13;TOMM34;TIMM21;TOMM40L;HSPD1;TIMM50;TOMM22;CHCHD4;TIMM17A;AURKAIP1
Aerobic Respiration (GO:0009060)	18/77	3.35794e-06	0.000284342	0	0	4.200023486123615	52.93785797294455	NDUFB9;NDUFA8;NDUFB7;NDUFA11;NDUFB10;NDUFB6;NDUFB11;CHCHD10;SDHD;ATP5F1C;SDHB;ATP5F1D;CSKMT;NDUFS6;UQCRC1;OGDH;NDUFS1;DLAT
Ribosome Assembly (GO:0042255)	12/37	3.82646e-06	0.000304377	0	0	6.5812844036697244	82.09211722191502	RPS15;NPM1;RPS28;RPS19;EIF6;RPS5;MPV17L2;MRPS2;BRIX1;ERAL1;FAU;MRPS7
Maturation of SSU-rRNA (GO:0030490)	12/37	3.82646e-06	0.000304377	0	0	6.5812844036697244	82.09211722191502	RPS28;NOB1;RPS19;WDR3;NOL7;TSR2;NAT10;TSR1;NOL10;RIOK1;WDR46;WDR43
U2-type Prespliceosome Assembly (GO:1903241)	9/23	1.11276e-05	0.000849381	0	0	8.792081632653062	100.28320870466206	SF3A3;SF3B4;SF3B5;SF3A1;SF3B2;SNRPG;SNRPB2;SNRPE;SNRPF
Spliceosomal Complex Assembly (GO:0000245)	15/61	1.13251e-05	0.000849381	0	0	4.47853604843148	51.003767491129295	SF3B4;SF3A3;SF3B5;SF3B2;SF3A1;DDX1;DDX23;PRPF19;USP39;SNRPG;SNRPE;SNRPB2;SNRPF;SNRNP200;SRSF9
Ribosomal Large Subunit Biogenesis (GO:0042273)	12/42	1.65868e-05	0.00120945	0	0	5.482110091743119	60.341066762273144	NPM1;EBNA1BP2;NSA2;EIF6;PES1;BRIX1;MALSU1;RPL26;NOC2L;RPF2;GTPBP4;RPF1
Protein Stabilization (GO:0050821)	28/174	2.02227e-05	0.00143472	0	0	2.651549097426706	28.65981217837259	HSP90AB1;PHB2;RTN4;USP19;SAV1;HSPD1;LAMP1;RUVBL2;TBL1X;CCT7;CCT5;CCT3;USP7;HSP90AA1;PAQR4;RPL23;GLMP;GTPBP4;MTOR;CCT6A;TNIP2;CDC37;DNAJA3;CALR;PFN1;PPIB;GAPDH;PFDN6
Ubiquitin-Dependent Protein Catabolic Process (GO:0006511)	47/381	6.37292e-05	0.00440235	0	0	1.9581231801629715	18.917168093924165	VCP;PSMD11;PSMD14;PSMD13;PTPN23;AMBRA1;UBE2J2;DTX4;PSMA7;CCAR1;PSMD8;PSMB6;PCNP;PSMB7;HERC4;PSMD6;PSMB4;UCHL1;PSMD7;PSMB5;MAEA;PSMD4;PSMB2;TRIM28;PSMB3;PSMD2;PSMD3;PSMB1;CHMP1A;PSMD1;PSMF1;TBL1X;KLHDC3;FBXW5;AXIN1;PSMA5;SEM1;RNF167;RNF126;PSMC5;PSMA4;PSMC6;PSMC3;PSMC4;PSMC1;SPSB4;RNF187
RNA Splicing, via Transesterification Reactions (GO:0000375)	8/23	9.31605e-05	0.00627042	0	0	7.285235920852359	67.61563649643381	SF3A3;SF3B4;SNRNP40;KHSRP;DDX23;SRSF4;PRPF8;SMNDC1
Maturation of LSU-rRNA (GO:0000470)	7/18	0.00011479	0.0075331	0	0	8.685601741474033	78.79930423360925	NSA2;EIF6;PES1;RPL35;RPF2;FTSJ3;RPF1
tRNA Transcription by RNA Polymerase III (GO:0042797)	5/9	0.000151136	0.00967637	0	0	17.032138794084187	149.83738286261197	GTF3C2;GTF3C5;GTF3C6;POLR2F;POLR2L
Energy Derivation by Oxidation of Organic Compounds (GO:0015980)	9/32	0.000217727	0.013608	0	0	5.34767701863354	45.093038280584715	COX8A;UQCRQ;COX4I1;UQCRC1;CYCS;NDUFS1;COX5A;COX6B1;SLC25A13
Maturation of SSU-rRNA Frm Tricistronic rRNA Trnscpt (GO:0000462)	8/26	0.000246718	0.0150613	0	0	6.069507864028412	50.42101512709554	TBL3;RPS19;BMS1;TSR2;TSR1;NOL10;WDR46;WDR43
Positive Regulation of Translation (GO:0045727)	17/96	0.000261704	0.015613	0	0	2.954082898982378	24.366154405023085	EIF5AL1;NPM1;SSB;PRMT1;EIF4A3;MPV17L2;NAT10;ELAVL1;MTOR;RCC1L;RPUSD4;EIF6;RPS6KB2;POLR2G;RPL26;PABPC1;EIF3D
tRNA Transcription (GO:0009304)	5/10	0.000285172	0.0165258	0	0	13.62457337883959	111.20945699674134	GTF3C2;GTF3C5;GTF3C6;POLR2F;POLR2L
Chaperone Mediated Protein Folding Independent of Cofactor (GO:0051086)	4/6	0.000296934	0.0165258	0	0	27.225	221.1214406517483	CCT3;CCT6A;CCT7;CCT5
Ribosomal Small Subunit Export From Nucleus (GO:0000056)	4/6	0.000296934	0.0165258	0	0	27.225	221.1214406517483	RPS15;NPM1;NUP88;RAN
Mitochondrial Ribosome Assembly (GO:0061668)	6/15	0.000302185	0.0165258	0	0	9.090356871678056	73.67252306699064	DHX30;MPV17L2;MRPS2;MCAT;MRM2;RCC1L
Regulation of Translation (GO:0006417)	26/184	0.000348484	0.0186688	0	0	2.267548906789413	18.054039866849227	DDX1;EIF4A3;NOLC1;NAT10;MALSU1;ELAVL1;GSPT1;TCOF1;ALKBH1;OGFOD1;RPS6KA1;RPS3;EIF4H;EIF2B4;NPM1;EIF2B2;SSB;PRMT1;MTOR;EIF6;RPL26;CALR;GAPDH;EIF3D;EIF4G1;EIF3B
Protein Import Into Mitochondrial Matrix (GO:0030150)	6/16	0.00045553	0.0239153	0	0	8.180637813211845	62.942229147937105	TOMM70;TOMM40;TIMM17A;TIMM21;TOMM40L;TIMM50
RNA Splicing (GO:0008380)	15/84	0.00053944	0.0277653	0	0	2.979936959023365	22.42396076145467	SF3B4;SF3A3;SF3B2;PRMT1;DDX23;USP39;PRPF8;SNRNP40;KHSRP;SNRPG;SRSF4;RNPS1;SNRPF;TARDBP;SMNDC1
Positive Regulation of Telomerase RNA Localization to Cajal Body (GO:1904874)	4/7	0.000655104	0.0328539	0	0	18.14848484848485	133.04140346944524	CCT3;CCT6A;CCT7;CCT5
Chaperone-Mediated Protein Complex Assembly (GO:0051131)	6/17	0.000663336	0.0328539	0	0	7.436322219921308	54.42071057528793	HSP90AA1;MKKS;HSP90AB1;HSPA4;PFDN6;HSPD1
Regulation of Transcription by RNA Polymerase I (GO:0006356)	8/30	0.000722903	0.0345022	0	0	4.9643005396430055	35.902989868322216	RASL11A;DDX56;WDR75;MAF1;LYAR;WDR43;POLR2K;POLR2L
Protein Transmembrane Import Into Intracellular Organelle (GO:0044743)	8/30	0.000722903	0.0345022	0	0	4.9643005396430055	35.902989868322216	CHCHD4;TOMM70;TOMM40;TIMM17A;TIMM21;TOMM40L;HSPD1;TIMM50
ATP Metabolic Process (GO:0046034)	10/45	0.000781564	0.0361152	0	0	3.905197777051324	27.938620684998696	ATP5F1A;NT5E;PARG;ATP5F1B;OLA1;PRKAG2;NUDT5;ATP5F1C;GAPDH;SLC25A13
Outer Mitochondrial Membrane Organization (GO:0007008)	5/12	0.000797973	0.0361152	0	0	9.730212904274337	69.40984673421575	TOMM70;MTCH2;TOMM40;HSPA4;TOMM22
Protein Insertion Into Mitochondrial Outer Membrane (GO:0045040)	5/12	0.000797973	0.0361152	0	0	9.730212904274337	69.40984673421575	TOMM70;MTCH2;TOMM40;HSPA4;TOMM22
Protein-Containing Complex Assembly (GO:0065003)	32/258	0.000825526	0.0367289	0	0	1.953550209813453	13.869209152873688	STOML2;PSMD11;HSP90AB1;PEF1;POMP;CLTA;HSPD1;CHCHD4;PSMB5;PPP2R1A;PDZD11;HSF1;AP2S1;EIF4H;TMED2;ELOB;AP2M1;HSP90AA1;MKKS;TRAPPC2L;HSPA4;TRAPPC4;ADRM1;AXIN1;CHCHD10;MITF;FASN;CSNK2B;PREB;CASQ1;MCU;PFDN6
Response to Unfolded Protein (GO:0006986)	9/38	0.000871851	0.0375182	0	0	4.239133004926108	29.864236221485527	DAXX;HSP90AA1;HSP90AB1;HSPA4;HSF1;BAX;TMBIM6;HSPE1;HSPD1
Import Into the Mitochondrion (GO:0170036)	9/38	0.000871851	0.0375182	0	0	4.239133004926108	29.864236221485527	TOMM70;TOMM40;SLC25A39;TIMM17A;VDAC1;TIMM21;TOMM40L;MCU;TIMM50
rRNA Modification (GO:0000154)	6/18	0.00093761	0.0396972	0	0	6.816059225512529	47.52276767156582	RPUSD4;FBL;NAT10;MRM2;NOP10;FTSJ3
Positive Regulation of Transcription by RNA Polymerase I (GO:0045943)	8/32	0.00114932	0.0478883	0	0	4.549847792998478	30.796036507407702	RASL11A;DDX56;WDR75;PWP1;LYAR;WDR43;MTOR;SMARCA4
RNA Biosynthetic Process (GO:0032774)	18/119	0.00123626	0.0485431	0	0	2.4448357075892346	16.369794779968807	PRMT5;PABPC4;ISG20L2;DDX54;AEN;PWP1;REXO4;HNRNPL;XAB2;PPP5C;EXOSC5;SNRNP40;HNRNPK;TAF7;RNPS1;EXOSC3;EXOSC1;NFKBIB
Regulation of Protein Localization to Cajal Body (GO:1904869)	4/8	0.001239	0.0485431	0	0	13.610227272727272	91.09933103058879	CCT3;CCT6A;CCT7;CCT5
Malate-Aspartate Shuttle (GO:0043490)	4/8	0.001239	0.0485431	0	0	13.610227272727272	91.09933103058879	GOT2;SLC25A11;SLC25A22;SLC25A13
Positive Regulation of Protein Localization to Cajal Body (GO:1904871)	4/8	0.001239	0.0485431	0	0	13.610227272727272	91.09933103058879	CCT3;CCT6A;CCT7;CCT5
Negative Regulation of RNA Splicing (GO:0033119)	6/19	0.00129142	0.0491301	0	0	6.291221307166637	41.84928125105193	RPS26;RNPS1;SRSF4;TMBIM6;RPS13;SRSF9
protein-DNA Complex Disassembly (GO:0032986)	6/19	0.00129142	0.0491301	0	0	6.291221307166637	41.84928125105193	SET;RPL23;MYC;HMGA1;SSRP1;SMARCA4
Transcription Elongation by RNA Polymerase II (GO:0006368)	7/26	0.00146122	0.0547958	0	0	5.025145532017044	32.80657712626237	CDK9;CTDP1;ELOF1;SART3;CTR9;POLR2I;IWS1
Mitochondrial Transport (GO:0006839)	9/41	0.00155644	0.0571879	0	0	3.84075	24.831803657253076	TOMM70;MTCH2;HSP90AA1;TOMM40;HSPA4;TIMM13;SLC25A5;TOMM22;SLC25A13
RNA Modification (GO:0009451)	10/49	0.00156858	0.0571879	0	0	3.5034911693950597	22.624087692660552	PUS3;TRMU;SSB;ALKBH1;NAT10;FTSJ1;HNRNPAB;MRM2;NOP10;FTSJ3
Positive Regulation of Telomere Maintenance via Telomerase (GO:0032212)	6/20	0.00173877	0.0620563	0	0	5.8413602342987305	37.11936007419342	CCT3;CCT6A;HSP90AA1;CCT7;CCT5;WRAP53
Ribosomal Large Subunit Assembly (GO:0000027)	5/14	0.00179668	0.0620563	0	0	7.566679307293642	47.835149900987375	DHX30;EIF6;BRIX1;MRM2;RCC1L
tRNA Wobble Base Modification (GO:0002097)	5/14	0.00179668	0.0620563	0	0	7.566679307293642	47.835149900987375	CTU2;CTU1;URM1;ALKBH1;NAT10
tRNA Wobble Uridine Modification (GO:0002098)	5/14	0.00179668	0.0620563	0	0	7.566679307293642	47.835149900987375	TRMU;CTU2;CTU1;URM1;DPH3
Cellular Response to Light Stimulus (GO:0071482)	10/50	0.00184233	0.062504	0	0	3.4156178489702516	21.507195983050114	NPM1;MYC;RUVBL2;POLD1;TRIAP1;RPL26;NOC2L;EIF2S1;AURKB;COPS9
Establishment of Protein Localization to Mitochondrial Membrane (GO:0090151)	7/27	0.00185726	0.062504	0	0	4.773489167616876	30.018809959085143	TOMM70;MTCH2;HSP90AA1;TOMM40;HSPA4;TIMM13;TOMM22
Positive Regulation of Protein Metabolic Process (GO:0051247)	22/165	0.00206879	0.0687414	0	0	2.112796716044976	13.058755620260623	NPM1;VCP;HSP90AA1;SSB;PRMT1;PLK2;RAB1B;EIF4A3;AXIN1;NAT10;IDE;OAZ1;ELAVL1;MTOR;RNF41;EIF6;RPL26;AURKAIP1;EIF3D;RAB7A;EIF4G1;ABCF1
Purine Ribonucleoside Triphosphate Biosynthetic Process (GO:0009206)	4/9	0.0021093	0.0692116	0	0	10.887272727272727	67.08080770645408	ATP5F1B;PRKAG2;ATP5F1C;SLC25A13
Cytoplasmic Translational Initiation (GO:0002183)	8/35	0.00214095	0.0693827	0	0	4.0432944359885	24.852126999909927	EIF2B4;EIF2B2;EIF3I;EIF4H;EIF2B1;EIF3D;EIF3B;EIF4G1
Maturation of 5.8S rRNA (GO:0000460)	5/15	0.00254393	0.0814367	0	0	6.809442548350398	40.6799208738805	NSA2;EIF6;PES1;FTSJ3;RPF1
tRNA Processing (GO:0008033)	9/44	0.00261739	0.082779	0	0	3.510661224489796	20.872903656986363	PUS3;TRMU;POP7;SSB;DDX1;RTCB;FTSJ1;TSEN54;RTRAF
Regulation of Translational Initiation (GO:0006446)	11/61	0.00265582	0.0829943	0	0	3.006666666666667	17.83254655768991	NPM1;EIF2B2;ALKBH1;DDX1;RPS6KB2;EIF4H;POLR2G;MTOR;PPP1CA;EIF3B;EIF4G1
DNA-templated Transcription (GO:0006351)	22/169	0.00280138	0.085854	0	0	2.0546111716148174	12.076270301620278	PRMT5;GTF3C2;GTF3C5;GTF3C6;CCDC124;DDX56;TWNK;MRPL12;PWP1;CDK9;XAB2;PPP5C;POLR2F;TAF7;RNPS1;POLR2G;TRIP13;POLR2I;POLR2J;POLR2K;NFKBIB;POLR2L
G1/S Transition of Mitotic Cell Cycle (GO:0000082)	10/53	0.00290199	0.085854	0	0	3.1765206747911234	18.55837298315181	CCNA2;PLK3;CCNB1;CCNE1;CDK4;MYC;PLK2;CCNF;CUL2;GSPT1
5S Class rRNA Transcription by RNA Polymerase III (GO:0042791)	3/5	0.00291086	0.085854	0	0	20.395573212258796	119.09602065192615	GTF3C2;GTF3C5;GTF3C6
Regulation of Establishment of Protein Localization to Telomere (GO:0070203)	3/5	0.00291086	0.085854	0	0	20.395573212258796	119.09602065192615	CCT6A;USP7;WRAP53
Negative Regulation of Stress-Activated MAPK Cascade (GO:0032873)	3/5	0.00291086	0.085854	0	0	20.395573212258796	119.09602065192615	GSTP1;MYC;PPIA
Negative Regulation of Kinase Activity (GO:0033673)	8/37	0.00310896	0.090678	0	0	3.7638167217760983	21.730272934067486	GSTP1;DNAJA3;GSKIP;PRKAG2;TAF7;TRIM27;PPIA;RTRAF
Regulation of Telomerase RNA Localization to Cajal Body (GO:1904872)	4/10	0.0033254	0.0948823	0	0	9.071969696969697	51.766161966502324	CCT3;CCT6A;CCT7;CCT5
Regulation of DNA-templated DNA Replication Initiation (GO:0030174)	4/10	0.0033254	0.0948823	0	0	9.071969696969697	51.766161966502324	CDT1;GMNN;KAT7;WRNIP1
mRNA Metabolic Process (GO:0016071)	14/91	0.00353421	0.0997561	0	0	2.4877742946708463	14.044143023075746	SF3B4;SF3A3;SF3B2;SF3A1;SSB;USP39;PRPF8;HNRNPAB;LSM3;TBRG4;EXOSC5;SRSF4;EXOSC3;SRSF9
Positive Regulation of Telomere Maintenance via Telomere Lengthening (GO:1904358)	6/23	0.00379322	0.105133	0	0	4.809326008307651	26.809785290707026	CCT3;CCT6A;HSP90AA1;CCT7;CCT5;WRAP53
Intracellular Protein Transport (GO:0006886)	33/295	0.00381439	0.105133	0	0	1.7344973582942385	9.659369541671415	IPO13;IPO11;MTCH2;TOMM40;RAB1B;TIMM13;PTPN23;PHB2;TOMM22;TIMM50;SCFD2;TIMM17A;TMED2;NUP88;KPNA2;YWHAH;TOMM70;NPM1;HSP90AA1;RANBP3;HSPA4;AP3D1;SIRT6;TIMM21;EHD1;SEC23IP;SNX17;HGS;PEX3;ERP29;CALR;RAN;RAB7A
Cell Cycle G1/S Phase Transition (GO:0044843)	10/55	0.00384486	0.105133	0	0	3.034833460462751	16.876763629927222	CCNA2;PLK3;CCNB1;CCNE1;CDK4;MYC;PLK2;CCNF;CUL2;GSPT1
Transcription by RNA Polymerase III (GO:0006383)	7/31	0.00432467	0.115839	0	0	3.9765773470163435	21.64618026255015	GTF3C2;ELL;GTF3C5;GTF3C6;POLR2F;POLR2K;POLR2L
Purine Ribonucleotide Biosynthetic Process (GO:0009152)	7/31	0.00432467	0.115839	0	0	3.9765773470163435	21.64618026255015	ATP5F1A;ATIC;ATP5F1B;PRKAG2;AMPD2;ATP5F1C;SLC25A13
Regulation of Apoptotic Process (GO:0042981)	52/523	0.00441145	0.11697	0	0	1.5273354564755839	8.283581467102588	MTCH2;TRIAP1;PHB2;CCAR1;MYDGF;MYC;RUVBL2;RPS6KA1;CTSD;CTNNBL1;PHLDA3;TOMM70;DAXX;HSP90AA1;TNFRSF12A;UTP11;RHOB;MORF4L2;NAA35;TMBIM6;VDAC1;PPIA;LTF;BEX2;VCP;HDAC3;GSTP1;RTN4;HSP90B1;SAV1;HSPD1;BCL2L12;RPS3;PLK3;JUN;NPM1;HSPA5;PLK2;PA2G4;MTOR;RSL1D1;HNRNPK;STK17A;FASN;DNAJA3;ANP32E;BAX;RNPS1;CIAPIN1;CALR;TARDBP;LAMTOR5
TORC1 Signaling (GO:0038202)	5/17	0.00467232	0.121284	0	0	5.673587409935533	30.445034584925576	RPS6KA1;RPS6KB2;LAMTOR1;MTOR;LAMTOR5
Protein Methylation (GO:0006479)	6/24	0.00476845	0.121284	0	0	4.541761579347001	24.279046363930984	PRMT5;SETD3;PRMT7;CSKMT;PRMT1;GSPT1
Regulation of Centrosome Duplication (GO:0010824)	6/24	0.00476845	0.121284	0	0	4.541761579347001	24.279046363930984	NPM1;FBXW5;PLK2;CCNF;CHMP1A;NAT10
NADH Oxidation (GO:0006116)	4/11	0.00494375	0.121284	0	0	7.775324675324676	41.28410266181559	GOT2;SLC25A11;SLC25A22;SLC25A13
RNA Splicing, via Endonucleolytic Cleavage and Ligation (GO:0000394)	4/11	0.00494375	0.121284	0	0	7.775324675324676	41.28410266181559	DDX1;RTCB;TSEN54;RTRAF
tRNA Splicing, via Endonucleolytic Cleavage and Ligation (GO:0006388)	4/11	0.00494375	0.121284	0	0	7.775324675324676	41.28410266181559	DDX1;RTCB;TSEN54;RTRAF
Mitochondrial Electron Transport, Cytochrome C to Oxygen (GO:0006123)	4/11	0.00494375	0.121284	0	0	7.775324675324676	41.28410266181559	COX8A;CYCS;COX5A;COX6B1
Mitochondrial Electron Transport, Ubiquinol to Cytochrome C (GO:0006122)	4/11	0.00494375	0.121284	0	0	7.775324675324676	41.28410266181559	UQCRQ;UQCRC1;CYCS;UQCRFS1
Purine Ribonucleotide Metabolic Process (GO:0009150)	8/40	0.00516051	0.123954	0	0	3.4101027397260273	17.960053343936426	TPST2;HINT1;NT5E;OLA1;ABHD14B;AMPD2;RAN;EPHA2
'De Novo' Post-Translational Protein Folding (GO:0051084)	7/32	0.00521377	0.123954	0	0	3.817194982896237	20.064903793309373	CCT3;CCT6A;HSPA5;DNAJC7;CCT7;HSPE1;CCT5
Mitochondrial Electron Transport, NADH to Ubiquinone (GO:0006120)	7/32	0.00521377	0.123954	0	0	3.817194982896237	20.064903793309373	NDUFB9;NDUFA8;NDUFB7;NDUFB10;NDUFB6;NDUFS6;NDUFS1
7-Methylguanosine Cap Hypermethylation (GO:0036261)	3/6	0.00552479	0.123954	0	0	13.595913734392736	70.67848253887645	SNRPG;SNRPE;SNRPF
RNA Capping (GO:0036260)	3/6	0.00552479	0.123954	0	0	13.595913734392736	70.67848253887645	SNRPG;SNRPE;SNRPF
Ribosomal Large Subunit Export From Nucleus (GO:0000055)	3/6	0.00552479	0.123954	0	0	13.595913734392736	70.67848253887645	NPM1;NUP88;RAN
Telomerase RNA Localization (GO:0090672)	3/6	0.00552479	0.123954	0	0	13.595913734392736	70.67848253887645	RUVBL2;NOP10;WRAP53
Telomerase RNA Localization to Cajal Body (GO:0090671)	3/6	0.00552479	0.123954	0	0	13.595913734392736	70.67848253887645	RUVBL2;NOP10;WRAP53
Mitochondrial Large Ribosomal Subunit Assembly (GO:1902775)	3/6	0.00552479	0.123954	0	0	13.595913734392736	70.67848253887645	DHX30;MRM2;RCC1L
Negative Regulation of Stress-Activated Protein Kinase Signaling Cascade (GO:0070303)	3/6	0.00552479	0.123954	0	0	13.595913734392736	70.67848253887645	GSTP1;MYC;PPIA
RNA Metabolic Process (GO:0016070)	10/58	0.00569613	0.126715	0	0	2.844441266209001	14.699983779133891	EXOSC5;RNASEH2A;DDX24;KHSRP;MYC;PABPC4;DDX54;EXOSC3;EXOSC1;TBRG4
Nucleic Acid Metabolic Process (GO:0090304)	5/18	0.00610875	0.134752	0	0	5.236720049006738	26.69697085744832	NT5E;DDX24;DDX54;KPNA2;RAN
Protein N-linked Glycosylation via Asparagine (GO:0018279)	7/33	0.00623326	0.136353	0	0	3.6700728006315235	18.63609820167098	DPAGT1;DPM1;DAD1;RPN1;ALG3;DDOST;MPDU1
Maturation of LSU-rRNA Frm Tricistronic rRNA Trnscpt (GO:0000463)	4/12	0.00701665	0.152221	0	0	6.802840909090909	33.73848263963598	PES1;RPL35;RPF2;FTSJ3
Positive Regulation of Protein Catabolic Process (GO:0045732)	12/79	0.00738218	0.158838	0	0	2.4470765438860744	12.01193089964263	PLK3;VCP;HSP90AA1;PSMC5;PSMC6;PSMC3;PLK2;AXIN1;IDE;OAZ1;RNF41;RAB7A
Regulation of Mitotic Cell Cycle Spindle Assembly Checkpoint (GO:0090266)	5/19	0.00782923	0.16574	0	0	4.862262311067772	23.581441779457137	CCNB1;INCENP;SKA3;AURKB;MAD2L1
Positive Regulation of RNA Metabolic Process (GO:0051254)	5/19	0.00782923	0.16574	0	0	4.862262311067772	23.581441779457137	WDR75;ZC3H18;RIOK1;HRAS;WDR43
Negative Regulation of Protein Kinase Activity (GO:0006469)	9/52	0.00831309	0.174575	0	0	2.8556013289036546	13.678113043281257	NPM1;GSTP1;DNAJA3;PRKAG2;GSKIP;TAF7;TRIM27;PPIA;RTRAF
Spliceosomal tri-snRNP Complex Assembly (GO:0000244)	4/13	0.00959128	0.195171	0	0	6.0464646464646465	28.09732118395182	TSSC4;SART3;PRPF19;PRPF8
Endonucleolytic Clvg of Tricistronic rRNA Trnscpt (GO:0000479)	4/13	0.00959128	0.195171	0	0	6.0464646464646465	28.09732118395182	RCL1;TBL3;BMS1;TSR1
Pseudouridine Synthesis (GO:0001522)	4/13	0.00959128	0.195171	0	0	6.0464646464646465	28.09732118395182	PUS3;RPUSD4;PUS1;NOP10
Regulation of DNA-templated DNA Replication (GO:0090329)	4/13	0.00959128	0.195171	0	0	6.0464646464646465	28.09732118395182	CDT1;GMNN;WRNIP1;KAT7
Negative Regulation of Protein Phosphorylation (GO:0001933)	11/74	0.0118131	0.236606	0	0	2.3836433389697995	10.579919358246945	SMOX;GSTP1;DNAJA3;PRKAG2;GSKIP;TAF7;TRIM27;TARDBP;PPIA;RTRAF;EIF4G1
Mitochondrion Organization (GO:0007005)	15/115	0.0120856	0.236606	0	0	2.0508055235903337	9.055819109730201	TRABD;STOML2;CHCHD10;PHB2;HSD17B10;RCC1L;TIMM50;HSPD1;CHCHD4;CHCHD3;DNAJA3;MYH14;BAX;SSBP1;CEP89
COPII Vesicle Coating (GO:0048208)	5/21	0.0122234	0.236606	0	0	4.253768486916951	18.735300843911286	TRAPPC2L;PEF1;TRAPPC4;TMED2;PREB
Vesicle Targeting, Rough ER to cis-Golgi (GO:0048207)	5/21	0.0122234	0.236606	0	0	4.253768486916951	18.735300843911286	TRAPPC2L;PEF1;TRAPPC4;TMED2;PREB
Protein Localization to Chromatin (GO:0071168)	5/21	0.0122234	0.236606	0	0	4.253768486916951	18.735300843911286	RAD21;RUVBL2;TONSL;LRWD1;PPHLN1
Vesicle Coating (GO:0006901)	6/29	0.0125554	0.236606	0	0	3.5529365157967714	15.55333654424196	TRAPPC2L;PEF1;TRAPPC4;AP3D1;TMED2;PREB
Cellular Response to Gamma Radiation (GO:0071480)	4/14	0.0127091	0.236606	0	0	5.441363636363636	23.753916992256848	XRCC6;HSF1;RPL26;HRAS
mRNA Modification (GO:0016556)	4/14	0.0127091	0.236606	0	0	5.441363636363636	23.753916992256848	PUS3;RPUSD4;PUS1;HNRNPAB
Positive Regulation by Host of Viral Transcription (GO:0043923)	4/14	0.0127091	0.236606	0	0	5.441363636363636	23.753916992256848	CDK9;JUN;CTDP1;SMARCA4
Protein Localization to Vacuole (GO:0072665)	4/14	0.0127091	0.236606	0	0	5.441363636363636	23.753916992256848	RRAGA;GLMP;RTN4;LAMTOR5
rRNA Transcription (GO:0009303)	4/14	0.0127091	0.236606	0	0	5.441363636363636	23.753916992256848	GTF3C2;GTF3C5;TCOF1;GTF3C6
Regulation of Cellular Response to Heat (GO:1900034)	4/14	0.0127091	0.236606	0	0	5.441363636363636	23.753916992256848	DNAJB6;DNAJC7;HSF1;MTOR
Protein Catabolic Process (GO:0030163)	12/85	0.0130374	0.240739	0	0	2.2448158853839386	9.742350921886393	AFG3L2;VCP;UCHL1;HSP90AA1;PSMB1;IDE;DTX4;PRPF19;TRIM21;CTSD;RNF41;RAB7A
Regulation of Retrograde Transport, Endosome to Golgi (GO:1905279)	2/3	0.0135028	0.240739	0	0	27.165532879818596	116.9437866343904	USP7;EIPR1
Tyrosine Metabolic Process (GO:0006570)	2/3	0.0135028	0.240739	0	0	27.165532879818596	116.9437866343904	THAP4;FAH
Negative Regulation of Execution Phase of Apoptosis (GO:1900118)	2/3	0.0135028	0.240739	0	0	27.165532879818596	116.9437866343904	DFFA;HSPD1
Positive Regulation of DNA Biosynthetic Process (GO:2000573)	7/38	0.0136707	0.240739	0	0	3.07683819472542	13.207327877832814	CCT3;CCT6A;HSP90AA1;RFC2;CCT7;CCT5;WRAP53
Regulation of Translation in Response to Stress (GO:0043555)	3/8	0.0139399	0.240739	0	0	8.156186152099886	34.8513634112865	RPS6KA1;EIF2S1;PPP1CA
Co-Transcriptional mRNA 3'-End Processing, Cleavage and Polyadenylation Pathway (GO:0180010)	3/8	0.0139399	0.240739	0	0	8.156186152099886	34.8513634112865	CSTF3;PAPOLA;SSU72
Transcription-Coupled Nucleotide-Excision Repair (GO:0006283)	3/8	0.0139399	0.240739	0	0	8.156186152099886	34.8513634112865	XAB2;USP7;POLR2I
Mitochondrial tRNA Modification (GO:0070900)	3/8	0.0139399	0.240739	0	0	8.156186152099886	34.8513634112865	RPUSD4;PUS1;HSD17B10
Positive Regulation of Transcription of Nucleolar Large rRNA by RNA Polymerase I (GO:1901838)	3/8	0.0139399	0.240739	0	0	8.156186152099886	34.8513634112865	PWP1;MTOR;SMARCA4
Proteasome Assembly (GO:0043248)	3/8	0.0139399	0.240739	0	0	8.156186152099886	34.8513634112865	PSMB5;PSMD11;POMP
tRNA Modification (GO:0006400)	10/66	0.0140653	0.241317	0	0	2.436457992808107	10.389157706954311	PUS3;TRMU;CTU2;CTU1;SSB;ALKBH1;PUS1;URM1;NAT10;FTSJ1
Response to Endoplasmic Reticulum Stress (GO:0034976)	20/172	0.0144027	0.245501	0	0	1.8014437134502923	7.638729631510999	BCAP31;PDIA3;JUN;VCP;HSPA5;CCDC47;UBE2J2;PDIA6;EIF2S1;USP19;ECPAS;PDIA4;HSP90B1;PSMC6;TMEM258;CANX;BAX;HYOU1;CALR;SEC61B
Positive Regulation of Proteolysis Involved in Protein Catabolic Process (GO:1903052)	6/30	0.0148056	0.250739	0	0	3.4046127562642368	14.342792954616522	BCAP31;PSMC5;PSMC6;PSMC3;AXIN1;MTOR
Response to UV (GO:0009411)	12/87	0.015517	0.261104	0	0	2.1845871559633028	9.100589405384683	NPM1;MYC;RUVBL2;POLD1;SIRT6;RPL26;TRIAP1;NOC2L;EIF2S1;AURKB;USF1;COPS9
Positive Regulation of Mitotic Sister Chromatid Separation (GO:1901970)	4/15	0.0164056	0.274297	0	0	4.946280991735537	20.32987752716961	CDC20;ANAPC7;INCENP;AURKB
Cellular Response to UV (GO:0034644)	10/68	0.0171447	0.284841	0	0	2.352047660380336	9.563583149393732	NPM1;MYC;RUVBL2;POLD1;TRIAP1;RPL26;NOC2L;EIF2S1;AURKB;COPS9
Endoplasmic Reticulum to Golgi Vesicle-Mediated Transport (GO:0006888)	13/99	0.0177354	0.28877	0	0	2.064387365498091	8.324007398099152	BCAP31;TRAPPC2L;PEF1;TRAPPC4;RAB1B;NRBP1;YIF1A;LMAN2;TMED2;PREB;HYOU1;YKT6;SEC22C
Regulation of Cellular Response to Stress (GO:0080135)	13/99	0.0177354	0.28877	0	0	2.064387365498091	8.324007398099152	SF3B5;NPM1;PARG;USP19;MTOR;CDK9;DNAJC7;DNAJB6;RUVBL2;HSF1;UBE2V2;TAF7;EIF4G1
Respiratory Chain Complex IV Assembly (GO:0008535)	5/23	0.0180413	0.28877	0	0	3.7804955125774238	15.179042295955217	COX14;TIMM21;COA6;COX10;CEP89
Tricarboxylic Acid Cycle (GO:0006099)	5/23	0.0180413	0.28877	0	0	3.7804955125774238	15.179042295955217	CSKMT;OGDH;SDHD;DLAT;SDHB
Macromolecule Methylation (GO:0043414)	5/23	0.0180413	0.28877	0	0	3.7804955125774238	15.179042295955217	CSKMT;PRMT1;GSPT1;MRM2;FTSJ3
Positive Regulation of Signal Transduction by P53 Class Mediator (GO:1901798)	5/23	0.0180413	0.28877	0	0	3.7804955125774238	15.179042295955217	RPS15;EIF5AL1;MYC;RPL23;RPL26
Regulation of Cell Cycle (GO:0051726)	28/269	0.0182178	0.289829	0	0	1.5934385543103113	6.382285504196221	BEX2;RNASEH2A;HSP90AB1;CCNF;GMNN;PRKAG2;RRP8;TBRG4;CDC20;MAEA;MYC;PES1;RUVBL2;WDR5;KAT7;TRIM21;HRAS;KAT14;CDT1;JUN;ANAPC7;RHOB;CDK9;RNF167;CDK4;MORF4L2;CALR;TARDBP
Transcription by RNA Polymerase II (GO:0006366)	19/166	0.0195241	0.297829	0	0	1.7682828044512602	6.9601461898377535	CTDP1;ELOF1;ELL;CTR9;CCDC124;DDX56;ADRM1;SSU72;CDK9;ELOA;POLR2F;TAF7;ELOB;POLR2G;TRIP13;POLR2I;POLR2J;POLR2K;POLR2L
Regulation of Signal Transduction by P53 Class Mediator (GO:1901796)	8/50	0.0197051	0.297829	0	0	2.5959991302457057	10.194166928021254	RPS15;PRMT5;PLK3;USP7;RPL23;RPF2;AURKB;MTOR
Regulation of Nuclear-Transcribed mRNA Catabolic Process, Nonsense-Mediated Decay (GO:2000622)	3/9	0.0198553	0.297829	0	0	6.796254256526674	26.636464567858475	EIF4A3;PABPC1;HNRNPAB
Cellular Response to Nutrient (GO:0031670)	3/9	0.0198553	0.297829	0	0	6.796254256526674	26.636464567858475	PRMT1;MTOR;USF1
Stem Cell Development (GO:0048864)	3/9	0.0198553	0.297829	0	0	6.796254256526674	26.636464567858475	TCOF1;PEF1;NOLC1
mRNA Pseudouridine Synthesis (GO:1990481)	3/9	0.0198553	0.297829	0	0	6.796254256526674	26.636464567858475	PUS3;RPUSD4;PUS1
Modification-Dependent Macromolecule Catabolic Process (GO:0043632)	3/9	0.0198553	0.297829	0	0	6.796254256526674	26.636464567858475	FAU;RPS27A;UBA52
Negative Regulation of DNA Replication (GO:0008156)	3/9	0.0198553	0.297829	0	0	6.796254256526674	26.636464567858475	CDT1;GMNN;GTPBP4
Positive Regulation of rRNA Processing (GO:2000234)	3/9	0.0198553	0.297829	0	0	6.796254256526674	26.636464567858475	WDR75;RIOK1;WDR43
Regulation of DNA-templated Transcription Initiation (GO:2000142)	3/9	0.0198553	0.297829	0	0	6.796254256526674	26.636464567858475	JUN;CDK4;MITF
Regulation of Telomere Maintenance via Telomerase (GO:0032210)	7/41	0.0203882	0.298698	0	0	2.804648199074385	10.917929248996344	CCT3;CCT6A;HSP90AA1;NAT10;CCT7;CCT5;WRAP53
Mitochondrial Respiratory Chain Complex Assembly (GO:0033108)	11/80	0.0204336	0.298698	0	0	2.1752743330511146	8.463070998180172	CHCHD4;DMAC1;SDHAF1;UQCRFS1;NDUFS1;COX14;TIMM21;ATP5F1D;COA6;FOXRED1;CEP89
Positive Regulation of Proteasomal Protein Catabolic Process (GO:1901800)	11/80	0.0204336	0.298698	0	0	2.1752743330511146	8.463070998180172	BCAP31;PLK3;VCP;PSMC5;PSMC6;PSMC3;AXIN1;ELOB;SIRT6;HSPBP1;DDA1
Endocytic Recycling (GO:0032456)	9/60	0.0205232	0.298698	0	0	2.406050420168067	9.350394799124397	EHD1;EHD4;EIPR1;HGS;SNX17;PTPN23;ENTR1;RAB8A;RAB7A
Mitotic Cell Cycle Phase Transition (GO:0044772)	13/101	0.0206485	0.298698	0	0	2.0171302578018997	7.82669109869149	PLK3;CTDP1;PLK2;CCNF;CUL2;GSPT1;CCNA2;CCNB1;CCNE1;CDK4;MYC;ENSA;TACC3
Proteolysis Involved in Protein Catabolic Process (GO:0051603)	10/70	0.0206953	0.298698	0	0	2.2732646834477497	8.815372459858102	VCP;PSMB1;IDE;FAU;PRPF19;DTX4;RPS27A;TRIM21;UBA52;RNF41
Mitochondrial Fusion (GO:0008053)	4/16	0.0207097	0.298698	0	0	4.533712121212122	17.577893885939762	TRABD;STOML2;CHCHD3;RCC1L
Protein Localization to Nucleus (GO:0034504)	14/112	0.0211111	0.302823	0	0	1.951231527093596	7.527764080294434	IPO13;IPO11;NPM1;RAP1GDS1;CHCHD10;SIRT6;RPF2;PHB2;LMNB2;LMNA;NUP88;CALR;KPNA2;RAN
Cellular Response to Topologically Incorrect Protein (GO:0035967)	5/24	0.0215341	0.307212	0	0	3.58122268127657	13.745149692124382	VCP;DAXX;HSF1;BAX;TMBIM6
DNA-templated DNA Replication (GO:0006261)	8/51	0.0220116	0.308986	0	0	2.535414675586705	9.675613545532224	RFC2;POLD1;WDR18;TWNK;POLD2;WRNIP1;LRWD1;SSBP1
Regulation of Type I Interferon Production (GO:0032479)	8/51	0.0220116	0.308986	0	0	2.535414675586705	9.675613545532224	DDX56;BANF1;TRIM27;KPNA2;DTX4;TRIM21;GAPDH;PQBP1
Nucleosome Organization (GO:0034728)	8/51	0.0220116	0.308986	0	0	2.535414675586705	9.675613545532224	DAXX;NPM1;SART3;SET;HMGA1;SSRP1;NAP1L4;SMARCA4
Protein Localization to Lysosome (GO:0061462)	6/33	0.0231998	0.323933	0	0	3.025563148569982	11.387049482317407	RRAGA;HGS;GLMP;RTN4;LAMTOR5;RAB7A
Nitric Oxide Metabolic Process (GO:0046209)	4/17	0.0256443	0.340043	0	0	4.184615384615385	15.33006211445852	CYB5B;NQO1;HSP90AA1;NOSIP
Nucleosome Disassembly (GO:0006337)	4/17	0.0256443	0.340043	0	0	4.184615384615385	15.33006211445852	SET;HMGA1;SSRP1;SMARCA4
MHC Class I Protein Complex Assembly (GO:0002397)	2/4	0.0257785	0.340043	0	0	13.581632653061224	49.68454337656309	PDIA3;CALR
Regulation of Protein Localization to Chromosome, Telomeric Region (GO:1904814)	2/4	0.0257785	0.340043	0	0	13.581632653061224	49.68454337656309	USP7;GNL3
Regulation of Translational Termination (GO:0006449)	2/4	0.0257785	0.340043	0	0	13.581632653061224	49.68454337656309	OGFOD1;GSPT1
Response to Lead Ion (GO:0010288)	2/4	0.0257785	0.340043	0	0	13.581632653061224	49.68454337656309	PPP5C;PPP1CA
Innate Immune Response in Mucosa (GO:0002227)	2/4	0.0257785	0.340043	0	0	13.581632653061224	49.68454337656309	FAU;LTF
Negative Regulation of Protein Localization to Chromatin (GO:0120186)	2/4	0.0257785	0.340043	0	0	13.581632653061224	49.68454337656309	VCP;SIRT6
Negative Regulation of Viral Life Cycle (GO:1903901)	2/4	0.0257785	0.340043	0	0	13.581632653061224	49.68454337656309	CSNK2B;PPIA
Peptide Antigen Assembly With MHC Class I Protein Complex (GO:0002502)	2/4	0.0257785	0.340043	0	0	13.581632653061224	49.68454337656309	PDIA3;CALR
Positive Regulation of Intrinsic Apoptotic Signaling Pathway by P53 Class Mediator (GO:1902255)	2/4	0.0257785	0.340043	0	0	13.581632653061224	49.68454337656309	MYC;RPL26
ERAD Pathway (GO:0036503)	11/83	0.0261684	0.341624	0	0	2.08411289296169	7.592843655305631	VCP;PSMC6;HSPA5;CCDC47;CANX;SEC61B;CALR;UBE2J2;USP19;ECPAS;HSP90B1
Nucleic Acid Catabolic Process (GO:0141188)	6/34	0.0265867	0.341624	0	0	2.917263260657338	10.581919717287649	EXOSC5;RNASEH2A;PABPC4;EXOSC3;EXOSC1;REXO4
RNA Localization to Cajal Body (GO:0090670)	3/10	0.0269395	0.341624	0	0	5.824874331117237	21.052035596957168	RUVBL2;NOP10;WRAP53
Regulation of Transcription of Nucleolar Large rRNA by RNA Polymerase I (GO:1901836)	3/10	0.0269395	0.341624	0	0	5.824874331117237	21.052035596957168	PWP1;MTOR;SMARCA4
Co-Transcriptional RNA 3'-End Processing, Cleavage and Polyadenylation Pathway (GO:0180012)	3/10	0.0269395	0.341624	0	0	5.824874331117237	21.052035596957168	CSTF3;PAPOLA;SSU72
Xenobiotic Catabolic Process (GO:0042178)	3/10	0.0269395	0.341624	0	0	5.824874331117237	21.052035596957168	GSTM4;CYP2B6;TPMT
Negative Regulation by Host of Viral Transcription (GO:0043922)	3/10	0.0269395	0.341624	0	0	5.824874331117237	21.052035596957168	JUN;PSMC3;TARDBP
Protein Localization to Nuclear Envelope (GO:0090435)	3/10	0.0269395	0.341624	0	0	5.824874331117237	21.052035596957168	TMEM147;LMNA;LMNB2
Protein Maturation (GO:0051604)	14/116	0.0276852	0.349392	0	0	1.8740815866576517	6.722066154305683	PIGT;HOMER2;GPAA1;NAA20;RAP1GDS1;DOHH;UBAC1;CIAO1;HSPD1;CHCHD4;AFG3L2;CPNE1;CALR;AURKAIP1
Regulation of Proteasomal Protein Catabolic Process (GO:0061136)	7/44	0.0291167	0.3657	0	0	2.5765971216370303	9.111994113167487	PSMC5;HSP90AB1;PSMC6;PSMD14;PSMC3;PSMF1;USP19
GPI Anchored Protein Biosynthesis (GO:0180046)	5/26	0.0297687	0.370345	0	0	3.23961211333225	11.384966322535675	DPM1;DPM2;PIGT;GPAA1;PIGH
Response to Amino Acid (GO:0043200)	5/26	0.0297687	0.370345	0	0	3.23961211333225	11.384966322535675	RRAGA;TMBIM6;LAMTOR1;MTOR;LAMTOR5
Microtubule Cytoskeleton Organization Involved in Mitosis (GO:1902850)	8/54	0.0300616	0.372226	0	0	2.369465951955529	8.303805434484838	PLK3;NUDC;CCNB1;PLK2;BCCIP;TACC3;AURKB;RAN
Regulation of Programmed Cell Death (GO:0043067)	16/140	0.0307275	0.378684	0	0	1.762598483722313	6.138420580382261	TOMM70;DAXX;BEX2;VCP;HSP90AA1;RTN4;RSL1D1;PSMC5;FASN;RUVBL2;MORF4L2;ANP32E;RPS3;BAX;CALR;TARDBP
Glial Cell Development (GO:0021782)	4/18	0.0312259	0.381246	0	0	3.8853896103896104	13.46873256299812	EIF2B4;EIF2B2;CSPG5;EIF2B1
Heme Biosynthetic Process (GO:0006783)	4/18	0.0312259	0.381246	0	0	3.8853896103896104	13.46873256299812	ATP5IF1;ALAS1;CPOX;COX10
Regulation of Protein Kinase Activity (GO:0045859)	9/65	0.0328011	0.398624	0	0	2.1903061224489795	7.48491849816363	XRCC6;GSTP1;DNAJA3;PRKAG2;GSKIP;TAF7;TRIM27;PPIA;RTRAF
Regulation of Protein Modification by Small Protein Conjugation or Removal (GO:1903320)	5/27	0.0345356	0.413954	0	0	3.092098458992657	10.407274635103827	DAXX;HSP90AA1;HSP90AB1;GPS1;COPS7A
Clathrin-Dependent Endocytosis (GO:0072583)	5/27	0.0345356	0.413954	0	0	3.092098458992657	10.407274635103827	CANX;CLTB;AP2S1;CLTA;AP2M1
Heme Metabolic Process (GO:0042168)	5/27	0.0345356	0.413954	0	0	3.092098458992657	10.407274635103827	ATP5IF1;ALAS1;CPOX;COX10;HMOX2
Regulation of Mitotic Sister Chromatid Separation (GO:0010965)	3/11	0.0351879	0.417956	0	0	5.0963393870601585	17.057713298494743	CCNB1;INCENP;AURKB
sno(s)RNA 3'-End Processing (GO:0031126)	3/11	0.0351879	0.417956	0	0	5.0963393870601585	17.057713298494743	FBL;EXOSC5;EXOSC3
Positive Regulation of Protein Localization (GO:1903829)	11/87	0.0355134	0.419922	0	0	1.9737595707481763	6.58810549446188	CDK9;HSP90AB1;PARD6A;KAT7;SIRT6;ENTR1;LAMTOR1;RTN4;EIF4G1;GNL3;LAMTOR5
DNA Replication (GO:0006260)	9/66	0.0357594	0.420934	0	0	2.1516992481203006	7.167187051998061	RNASEH2A;SET;RFC2;POLD1;WDR18;TWNK;POLD2;WRNIP1;SSBP1
RNA-templated DNA Biosynthetic Process (GO:0006278)	4/19	0.037465	0.432477	0	0	3.626060606060606	11.909244030149257	HSP90AA1;HSP90AB1;NOP10;WRAP53
Response to Gamma Radiation (GO:0010332)	4/19	0.037465	0.432477	0	0	3.626060606060606	11.909244030149257	XRCC6;HSF1;RPL26;HRAS
Telomere Maintenance via Telomerase (GO:0007004)	4/19	0.037465	0.432477	0	0	3.626060606060606	11.909244030149257	HSP90AA1;HSP90AB1;NOP10;WRAP53
mRNA Cis Splicing, via Spliceosome (GO:0045292)	4/19	0.037465	0.432477	0	0	3.626060606060606	11.909244030149257	SART1;DDX23;SNRNP200;SNRPC
Positive Regulation of Protein Localization to Nucleus (GO:1900182)	9/67	0.0388956	0.432477	0	0	2.114423645320197	6.865269757857905	CCT3;CCT6A;HDAC3;TRIM28;KAT7;CCT7;CCT5;RAN;LAMTOR5
AMP Biosynthetic Process (GO:0006167)	2/5	0.0410236	0.432477	0	0	9.053665910808768	28.91386397125906	ATIC;APRT
Regulation of Endodeoxyribonuclease Activity (GO:0032071)	2/5	0.0410236	0.432477	0	0	9.053665910808768	28.91386397125906	NPM1;RPS3
Regulation of Intrinsic Apoptotic Signaling Pathway by P53 Class Mediator (GO:1902253)	2/5	0.0410236	0.432477	0	0	9.053665910808768	28.91386397125906	EIF5AL1;MYC
tRNA Pseudouridine Synthesis (GO:0031119)	2/5	0.0410236	0.432477	0	0	9.053665910808768	28.91386397125906	PUS3;RPUSD4
Establishment of Protein Localization to Chromatin (GO:0071169)	2/5	0.0410236	0.432477	0	0	9.053665910808768	28.91386397125906	RUVBL2;LRWD1
Transcription Elongation-Coupled Chromatin Remodeling (GO:0140673)	2/5	0.0410236	0.432477	0	0	9.053665910808768	28.91386397125906	SART3;IWS1
Lipid Glycosylation (GO:0030259)	2/5	0.0410236	0.432477	0	0	9.053665910808768	28.91386397125906	GBA2;GBGT1
mRNA 3'-Splice Site Recognition (GO:0000389)	2/5	0.0410236	0.432477	0	0	9.053665910808768	28.91386397125906	SF3A3;SF3A1
Negative Regulation of IRE1-mediated Unfolded Protein Response (GO:1903895)	2/5	0.0410236	0.432477	0	0	9.053665910808768	28.91386397125906	HSPA5;TMBIM6
Negative Regulation of Appetite (GO:0032099)	2/5	0.0410236	0.432477	0	0	9.053665910808768	28.91386397125906	MKKS;GDF15
Negative Regulation of Cellular Response to Hypoxia (GO:1900038)	2/5	0.0410236	0.432477	0	0	9.053665910808768	28.91386397125906	HYOU1;TMBIM6
- Reg of Nuclear-Transcribed mRNA Cat Proc, Nonsense-Mediated Decay (GO:2000623)	2/5	0.0410236	0.432477	0	0	9.053665910808768	28.91386397125906	PABPC1;HNRNPAB
Peptidyl-Lysine Trimethylation (GO:0018023)	2/5	0.0410236	0.432477	0	0	9.053665910808768	28.91386397125906	SETD3;CSKMT
Peptidyl-Proline Modification (GO:0018208)	2/5	0.0410236	0.432477	0	0	9.053665910808768	28.91386397125906	PPIB;PPIA
Polyprenol Metabolic Process (GO:0016093)	2/5	0.0410236	0.432477	0	0	9.053665910808768	28.91386397125906	DPM1;DPM2
Positive Regulation of ATP Biosynthetic Process (GO:2001171)	2/5	0.0410236	0.432477	0	0	9.053665910808768	28.91386397125906	VCP;TMSB4X
Positive Regulation of T Cell Mediated Immune Response to Tumor Cell (GO:0002842)	2/5	0.0410236	0.432477	0	0	9.053665910808768	28.91386397125906	PNKD;HSPD1
Positive Regulation of Endocytic Recycling (GO:2001137)	2/5	0.0410236	0.432477	0	0	9.053665910808768	28.91386397125906	EHD1;EIPR1
Positive Regulation of Protein Localization to Chromosome, Telomeric Region (GO:1904816)	2/5	0.0410236	0.432477	0	0	9.053665910808768	28.91386397125906	GNL3;WRAP53
Positive Regulation of Purine Nucleotide Biosynthetic Process (GO:1900373)	2/5	0.0410236	0.432477	0	0	9.053665910808768	28.91386397125906	VCP;TMSB4X
Positive Regulation of Synaptic Plasticity (GO:0031915)	2/5	0.0410236	0.432477	0	0	9.053665910808768	28.91386397125906	CDC20;DBN1
Negative Regulation of Response to Biotic Stimulus (GO:0002832)	6/38	0.0433401	0.45007	0	0	2.551751138952164	8.009122939585328	BANF1;DTX4;LYAR;TRIM21;AURKB;LTF
Positive Regulation of Proteasomal Ubiquitin-Dependent Protein Catabolic Process (GO:0032436)	8/58	0.0436506	0.45007	0	0	2.1791780821917808	6.824181588165645	CDC20;PLK3;VCP;AXIN1;ELOB;SIRT6;HSPBP1;DDA1
RNA Methylation (GO:0001510)	7/48	0.0442448	0.45007	0	0	2.3244430847957283	7.2476553863755475	FBL;SNRPG;SNRPE;SNRPF;FTSJ1;MRM2;FTSJ3
Dolichol-Linked Oligosaccharide Biosynthetic Process (GO:0006488)	4/20	0.0443664	0.45007	0	0	3.399147727272727	10.58927046573258	DPAGT1;DPM1;ALG3;MPDU1
Mitochondrial Cytochrome C Oxidase Assembly (GO:0033617)	4/20	0.0443664	0.45007	0	0	3.399147727272727	10.58927046573258	COX14;TIMM21;COA6;CEP89
Pigment Biosynthetic Process (GO:0046148)	4/20	0.0443664	0.45007	0	0	3.399147727272727	10.58927046573258	ATP5IF1;ALAS1;CPOX;COX10
Porphyrin-Containing Compound Biosynthetic Process (GO:0006779)	4/20	0.0443664	0.45007	0	0	3.399147727272727	10.58927046573258	ATP5IF1;ALAS1;CPOX;COX10
Positive Regulation of ATP Metabolic Process (GO:1903580)	4/20	0.0443664	0.45007	0	0	3.399147727272727	10.58927046573258	VCP;UCHL1;TMSB4X;MTOR
Antigen Processing and Presentation of Peptide Antigen via MHC Class I (GO:0002474)	3/12	0.0445784	0.45007	0	0	4.529701097237987	14.089664197439596	PDIA3;IDE;CALR
Response to Copper Ion (GO:0046688)	3/12	0.0445784	0.45007	0	0	4.529701097237987	14.089664197439596	DAXX;HSF1;ATP5F1D
Neural Crest Cell Differentiation (GO:0014033)	3/12	0.0445784	0.45007	0	0	4.529701097237987	14.089664197439596	TCOF1;PEF1;NOLC1
TOR Signaling (GO:0031929)	5/29	0.0454137	0.456747	0	0	2.8339495638983694	8.7624082728833	RPS6KA1;RPS6KB2;LAMTOR1;MTOR;LAMTOR5
Protein Import Into Nucleus (GO:0006606)	9/69	0.0457167	0.458039	0	0	2.0436	6.305101939965398	IPO13;IPO11;NPM1;RPL23;SIRT6;NUP88;KPNA2;PHB2;RAN
Regulation of Protein Ubiquitination (GO:0031396)	12/102	0.0467174	0.466286	0	0	1.8181957186544342	5.570294634430876	BEX3;DAXX;BEX2;HSP90AA1;HSP90AB1;HDAC3;CENPX;DNAJA3;AXIN1;RPS3;HSPBP1;GTPBP4
Positive Regulation of Mitotic Cell Cycle Phase Transition (GO:1901992)	8/59	0.0475901	0.473198	0	0	2.1362700331274063	6.505218896124394	CDC20;CCNB1;ANAPC7;CCNE1;CDK4;CDCA5;PHB2;EIF4G1
Regulation of DNA Binding (GO:0051101)	5/30	0.0515353	0.508638	0	0	2.7203640500568826	8.067207932342939	JUN;SMOX;CSNK2B;CPNE1;EDF1
Iron-Sulfur Cluster Assembly (GO:0016226)	4/21	0.0519295	0.508638	0	0	3.1989304812834223	9.462015173320697	GLRX3;CIAPIN1;CIAO1;NUBP2
Metallo-Sulfur Cluster Assembly (GO:0031163)	4/21	0.0519295	0.508638	0	0	3.1989304812834223	9.462015173320697	GLRX3;CIAPIN1;CIAO1;NUBP2
Regulation of Centrosome Cycle (GO:0046605)	4/21	0.0519295	0.508638	0	0	3.1989304812834223	9.462015173320697	NPM1;FBXW5;CHMP1A;NAT10
Regulation of Proteasomal Ubiquitin-Dependent Protein Catabolic Process (GO:0032434)	11/93	0.0535744	0.522453	0	0	1.8284161707596458	5.351194977491728	PLK3;USP7;VCP;HSP90AB1;GIPC1;CSNK2B;AXIN1;ELOB;SIRT6;HSPBP1;DDA1
Negative Regulation of Programmed Cell Death (GO:0043069)	27/284	0.053738	0.522453	0	0	1.43722786482572	4.201928740809152	HDAC3;GSTP1;TRIAP1;PHB2;HSP90B1;HSPD1;BCL2L12;MYDGF;MYC;RPS6KA1;PLK3;NQO1;NPM1;HSPA5;PLK2;PA2G4;MTOR;PSMC5;HNRNPK;FASN;DNAJA3;NAA35;VDAC1;TMBIM6;CIAPIN1;LAMTOR5;LTF
Cell Junction Maintenance (GO:0034331)	3/13	0.0550745	0.525711	0	0	4.07639046538025	11.817733723073477	PARD6A;CHCHD10;CBLN1
Regulation of Viral Life Cycle (GO:1903900)	3/13	0.0550745	0.525711	0	0	4.07639046538025	11.817733723073477	CSNK2B;KPNA2;PPIA
Formation of Cytoplasmic Translation Initiation Complex (GO:0001732)	3/13	0.0550745	0.525711	0	0	4.07639046538025	11.817733723073477	EIF3I;EIF3D;EIF3B
Positive Regulation of Mitotic Metaphase/Anaphase Transition (GO:0045842)	3/13	0.0550745	0.525711	0	0	4.07639046538025	11.817733723073477	CDC20;ANAPC7;SKA3
Protein Alkylation (GO:0008213)	3/13	0.0550745	0.525711	0	0	4.07639046538025	11.817733723073477	PRMT1;CSKMT;GSPT1
AMP Metabolic Process (GO:0046033)	2/6	0.058773	0.528353	0	0	6.7896825396825395	19.242455039749288	NT5E;AMPD2
IMP Biosynthetic Process (GO:0006188)	2/6	0.058773	0.528353	0	0	6.7896825396825395	19.242455039749288	ATIC;AMPD2
Regulation of Low-Density Lipoprotein Particle Clearance (GO:0010988)	2/6	0.058773	0.528353	0	0	6.7896825396825395	19.242455039749288	HNRNPK;KHSRP
Regulation of Melanin Biosynthetic Process (GO:0048021)	2/6	0.058773	0.528353	0	0	6.7896825396825395	19.242455039749288	GIPC1;MFSD12
Regulation of Mitotic Cytokinesis (GO:1902412)	2/6	0.058773	0.528353	0	0	6.7896825396825395	19.242455039749288	INCENP;AURKB
Cobalamin Metabolic Process (GO:0009235)	2/6	0.058773	0.528353	0	0	6.7896825396825395	19.242455039749288	MTRR;MMADHC
Stress Granule Disassembly (GO:0035617)	2/6	0.058773	0.528353	0	0	6.7896825396825395	19.242455039749288	VCP;TRIM21
tRNA 3'-End Processing (GO:0042780)	2/6	0.058773	0.528353	0	0	6.7896825396825395	19.242455039749288	SSB;HSD17B10
Maintenance of Synapse Structure (GO:0099558)	2/6	0.058773	0.528353	0	0	6.7896825396825395	19.242455039749288	CHCHD10;CBLN1
Metaphase/Anaphase Transition of Cell Cycle (GO:0044784)	2/6	0.058773	0.528353	0	0	6.7896825396825395	19.242455039749288	CDC20;TACC3
Morphogenesis of an Endothelium (GO:0003159)	2/6	0.058773	0.528353	0	0	6.7896825396825395	19.242455039749288	CSNK2B;RHOB
Necroptotic Process (GO:0070266)	2/6	0.058773	0.528353	0	0	6.7896825396825395	19.242455039749288	ITPK1;PGAM5
Negative Regulation of miRNA-mediated Gene Silencing (GO:0060965)	2/6	0.058773	0.528353	0	0	6.7896825396825395	19.242455039749288	ELOB;ELAVL1
Peptidyl-Histidine Modification (GO:0018202)	2/6	0.058773	0.528353	0	0	6.7896825396825395	19.242455039749288	SETD3;DPH3
Positive Regulation of Macrophage Activation (GO:0043032)	2/6	0.058773	0.528353	0	0	6.7896825396825395	19.242455039749288	TNIP2;HSPD1
Positive Regulation of Mitochondrial Calcium Ion Concentration (GO:0051561)	2/6	0.058773	0.528353	0	0	6.7896825396825395	19.242455039749288	RAP1GDS1;MCU
protein-DNA Complex Organization (GO:0071824)	2/6	0.058773	0.528353	0	0	6.7896825396825395	19.242455039749288	MYC;RPL23
Carbohydrate Derivative Biosynthetic Process (GO:1901137)	6/41	0.0594515	0.532628	0	0	2.3324438659290596	6.583544059040955	DPAGT1;DPM1;ALG3;TKT;GBGT1;MPDU1
Regulation of Mitochondrial Translation (GO:0070129)	4/22	0.0601485	0.53522	0	0	3.020959595959596	8.491730775268305	RPUSD4;MPV17L2;MALSU1;RCC1L
Organelle Fusion (GO:0048284)	4/22	0.0601485	0.53522	0	0	3.020959595959596	8.491730775268305	TRABD;CHCHD3;LDAH;RCC1L
Positive Regulation of Catabolic Process (GO:0009896)	16/153	0.0608225	0.539389	0	0	1.5935954791617613	4.4617404283668565	BCAP31;VCP;HSP90AA1;PLK2;AXIN1;IDE;AMBRA1;OAZ1;MTOR;RNF41;ATG101;KHSRP;ATG2A;ZC3H18;TRIM21;RAB7A
Positive Regulation of Ubiquitin-Dependent Protein Catabolic Process (GO:2000060)	9/73	0.0616408	0.544805	0	0	1.9152321428571428	5.33666137351779	BCAP31;PLK3;VCP;AXIN1;ELOB;SIRT6;HSPBP1;MTOR;DDA1
Regulation of Protein Catabolic Process (GO:0042176)	12/107	0.063071	0.555316	0	0	1.7217769193626267	4.758120600238877	NQO1;VCP;HSP90AA1;PSMD14;HGS;PLK2;AXIN1;IDE;OAZ1;RNF41;RAB7A;MAD2L1
Metaphase Chromosome Alignment (GO:0051310)	7/52	0.0636763	0.555316	0	0	2.117116432281769	5.830418233380637	NUDC;CCNB1;INCENP;CDCA5;GMNN;CHMP1A;SKA3
Positive Regulation of Binding (GO:0051099)	7/52	0.0636763	0.555316	0	0	2.117116432281769	5.830418233380637	CDT1;GMNN;DPH3;EDF1;IDE;TRIM21;RAN
Protein K63-linked Ubiquitination (GO:0070534)	7/52	0.0636763	0.555316	0	0	2.117116432281769	5.830418233380637	RNF167;RNF126;UBE2V2;UBE2O;TRIM27;PRPF19;TRIM21
Regulation of Glycolytic Process (GO:0006110)	5/32	0.065152	0.558556	0	0	2.518434247672018	6.877924056216968	UCHL1;EIF6;PRKAG2;SIRT6;MTOR
Cellular Response to Heat (GO:0034605)	5/32	0.065152	0.558556	0	0	2.518434247672018	6.877924056216968	VCP;DAXX;HSP90AA1;HSP90AB1;HSF1
Water-Soluble Vitamin Metabolic Process (GO:0006767)	5/32	0.065152	0.558556	0	0	2.518434247672018	6.877924056216968	MTRR;FLAD1;SLC25A19;SLC52A2;MMADHC
Positive Regulation of Viral Process (GO:0048524)	5/32	0.065152	0.558556	0	0	2.518434247672018	6.877924056216968	STAU1;PABPC1;KPNA2;PPIA;RAB7A
Positive Regulation of Protein Ubiquitination (GO:0031398)	8/63	0.0656207	0.558556	0	0	1.9802407638024075	5.39390614125474	HDAC3;CENPX;PEF1;DNAJA3;AXIN1;RPS2;HSPBP1;SPSB4
Regulation of rRNA Processing (GO:2000232)	3/14	0.0666287	0.558556	0	0	3.705499948405737	10.036789231621869	WDR75;RIOK1;WDR43
Transcription by RNA Polymerase I (GO:0006360)	3/14	0.0666287	0.558556	0	0	3.705499948405737	10.036789231621869	TCOF1;POLR2F;POLR2L
Negative Regulation of mRNA Splicing, via Spliceosome (GO:0048025)	3/14	0.0666287	0.558556	0	0	3.705499948405737	10.036789231621869	RNPS1;SRSF4;SRSF9
Oligodendrocyte Development (GO:0014003)	3/14	0.0666287	0.558556	0	0	3.705499948405737	10.036789231621869	EIF2B4;EIF2B2;EIF2B1
Positive Regulation of Mitochondrial Translation (GO:0070131)	3/14	0.0666287	0.558556	0	0	3.705499948405737	10.036789231621869	RPUSD4;MPV17L2;RCC1L
Regulation of ATP Metabolic Process (GO:1903578)	3/14	0.0666287	0.558556	0	0	3.705499948405737	10.036789231621869	ATP5IF1;EIF6;PRKAG2
Regulation of DNA Metabolic Process (GO:0051052)	12/108	0.0667434	0.558556	0	0	1.703698394495413	4.611741436217743	CDK9;CCNA2;SF3B5;PARG;MYC;RUVBL2;GMNN;LMNA;UBE2V2;TAF7;KAT7;KPNA2
Negative Regulation of Apoptotic Process (GO:0043066)	31/341	0.0668139	0.558556	0	0	1.3682297772567409	3.7022162980201196	SET;HDAC3;GSTP1;SERPINE1;TRIAP1;PHB2;HSP90B1;HSPD1;BCL2L12;MYDGF;MAEA;MYC;RPS6KA1;PLK3;DFFA;NPM1;HSPA5;UNC5B;PLK2;PA2G4;MTOR;HNRNPK;TNIP2;FASN;DNAJA3;NAA35;TMBIM6;VDAC1;CIAPIN1;LAMTOR5;LTF
Regulation of Respiratory Burst Involved in Inflammatory Response (GO:0060264)	1/1	0.0687133	0.567898	0	0	Infinity	Infinity	RPS19
Glycosylceramide Catabolic Process (GO:0046477)	1/1	0.0687133	0.567898	0	0	Infinity	Infinity	GBA2
Telomere Maintenance via Telomere Lengthening (GO:0010833)	4/23	0.0690132	0.567898	0	0	2.8617224880382777	7.650692222818137	HSP90AA1;HSP90AB1;NOP10;WRAP53
Translesion Synthesis (GO:0019985)	4/23	0.0690132	0.567898	0	0	2.8617224880382777	7.650692222818137	VCP;POLDIP2;POLD1;POLD2
Cellular Response to Unfolded Protein (GO:0034620)	7/53	0.0692295	0.567898	0	0	2.0709186455802886	5.530031610597024	DAXX;VCP;HSPA5;HSF1;BAX;TMBIM6;HSPD1
Negative Regulation of Immune Response (GO:0050777)	7/53	0.0692295	0.567898	0	0	2.0709186455802886	5.530031610597024	PLK2;BANF1;TRIM27;DTX4;TRIM21;LYAR;AURKB
Protein Targeting (GO:0006605)	13/121	0.0718929	0.58791	0	0	1.640823659480376	4.319594864208782	TOMM70;BCAP31;TOMM40;TOMM34;TIMM13;AP3D1;ZDHHC7;TOMM22;SPCS1;CDC37;GIPC1;TIMM17A;AURKAIP1
Regulation of mRNA Processing (GO:0050684)	5/33	0.0726435	0.588837	0	0	2.428287014464489	6.367432827360942	CDK9;HNRNPK;SAFB2;SAFB;IWS1
Proton Transmembrane Transport (GO:1902600)	5/33	0.0726435	0.588837	0	0	2.428287014464489	6.367432827360942	ATP5F1B;ATP6V0D1;ATP5MF;ATP5MC1;ATP6V1F
Mitotic Metaphase Chromosome Alignment (GO:0007080)	7/54	0.075063	0.588837	0	0	2.0266867221427014	5.247957108819526	CDT1;NUDC;CCNB1;CDCA5;CHMP1A;SKA3;AURKB
Protein Modification by Small Protein Removal (GO:0070646)	9/76	0.0756498	0.588837	0	0	1.8290149253731343	4.72186014418141	HINT1;UCHL1;USP7;PSMD14;GPS1;COPS7A;SENP3;USP19;OTUB1
Regulation of Stress-Activated MAPK Cascade (GO:0032872)	4/24	0.0785091	0.588837	0	0	2.7184090909090908	6.9171041417740255	GSTP1;MYC;FASN;PPIA
Negative Regulation of DNA Metabolic Process (GO:0051053)	4/24	0.0785091	0.588837	0	0	2.7184090909090908	6.9171041417740255	DFFA;GMNN;RPS3;GTPBP4
U4 snRNA 3'-End Processing (GO:0034475)	2/7	0.0786114	0.588837	0	0	5.431292517006803	13.81307369726697	EXOSC5;EXOSC3
Acidic Amino Acid Transport (GO:0015800)	2/7	0.0786114	0.588837	0	0	5.431292517006803	13.81307369726697	GIPC1;SLC7A14
Regulation of Protein Localization to Chromatin (GO:1905634)	2/7	0.0786114	0.588837	0	0	5.431292517006803	13.81307369726697	VCP;SIRT6
Dolichol Metabolic Process (GO:0019348)	2/7	0.0786114	0.588837	0	0	5.431292517006803	13.81307369726697	DPM1;DPM2
Killing by Host of Symbiont Cells (GO:0051873)	2/7	0.0786114	0.588837	0	0	5.431292517006803	13.81307369726697	GAPDH;LTF
Lipoprotein Catabolic Process (GO:0042159)	2/7	0.0786114	0.588837	0	0	5.431292517006803	13.81307369726697	LYPLA2;CTSD
Mucosal Immune Response (GO:0002385)	2/7	0.0786114	0.588837	0	0	5.431292517006803	13.81307369726697	FAU;LTF
Multi-Pass Transmembrane Protein Insertion Into ER Membrane (GO:0160063)	2/7	0.0786114	0.588837	0	0	5.431292517006803	13.81307369726697	TMEM147;NOMO1
Negative Regulation of DNA-templated DNA Replication (GO:2000104)	2/7	0.0786114	0.588837	0	0	5.431292517006803	13.81307369726697	CDT1;GMNN
Negative Regulation of Membrane Potential (GO:0045837)	2/7	0.0786114	0.588837	0	0	5.431292517006803	13.81307369726697	BAX;LTF
Negative Regulation of Transcription by RNA Polymerase I (GO:0016479)	2/7	0.0786114	0.588837	0	0	5.431292517006803	13.81307369726697	DDX56;MAF1
Non-Proteinogenic Amino Acid Catabolic Process (GO:0170044)	2/7	0.0786114	0.588837	0	0	5.431292517006803	13.81307369726697	MTRR;GOT2
poly(A)-dependent snoRNA 3'-End Processing (GO:0071051)	2/7	0.0786114	0.588837	0	0	5.431292517006803	13.81307369726697	EXOSC5;EXOSC3
Positive Regulation of Protein Polyubiquitination (GO:1902916)	2/7	0.0786114	0.588837	0	0	5.431292517006803	13.81307369726697	UBE2V2;SPSB4
Protein Localization to Cytoplasmic Stress Granule (GO:1903608)	2/7	0.0786114	0.588837	0	0	5.431292517006803	13.81307369726697	SSB;DDX1
Purine Ribonucleoside Monophosphate Biosynthetic Process (GO:0009168)	2/7	0.0786114	0.588837	0	0	5.431292517006803	13.81307369726697	ATIC;AMPD2
Regulation of Chaperone-Mediated Autophagy (GO:1904714)	2/7	0.0786114	0.588837	0	0	5.431292517006803	13.81307369726697	PLK3;SNRNP70
DNA Biosynthetic Process (GO:0071897)	3/15	0.0791845	0.588837	0	0	3.3964245175936436	8.613245488934986	POLD1;POLD2;WRNIP1
Regulation of mRNA Metabolic Process (GO:1903311)	3/15	0.0791845	0.588837	0	0	3.3964245175936436	8.613245488934986	SAFB2;SAFB;IWS1
Negative Regulation of mRNA Processing (GO:0050686)	3/15	0.0791845	0.588837	0	0	3.3964245175936436	8.613245488934986	RNPS1;SRSF4;SRSF9
Negative Regulation of Osteoclast Differentiation (GO:0045671)	3/15	0.0791845	0.588837	0	0	3.3964245175936436	8.613245488934986	TNFAIP6;TCTA;LTF
Nuclear Migration (GO:0007097)	3/15	0.0791845	0.588837	0	0	3.3964245175936436	8.613245488934986	LMNA;TACC3;LMNB2
Positive Regulation of Mitophagy (GO:1901526)	3/15	0.0791845	0.588837	0	0	3.3964245175936436	8.613245488934986	ATP5IF1;VDAC1;SLC25A5
Positive Regulation of Translational Initiation (GO:0045948)	3/15	0.0791845	0.588837	0	0	3.3964245175936436	8.613245488934986	RPS6KB2;POLR2G;MTOR
Regulation of IRE1-mediated Unfolded Protein Response (GO:1903894)	3/15	0.0791845	0.588837	0	0	3.3964245175936436	8.613245488934986	HSPA5;BAX;TMBIM6
Regulation of Cell Cycle G2/M Phase Transition (GO:1902749)	3/15	0.0791845	0.588837	0	0	3.3964245175936436	8.613245488934986	NPM1;CDK4;CCNQ
Cellular Response to Amino Acid Stimulus (GO:0071230)	5/34	0.0805844	0.59587	0	0	2.344356831822996	5.904147368745129	RRAGA;PRMT1;LAMTOR1;MTOR;LAMTOR5
Nucleosome Assembly (GO:0006334)	5/34	0.0805844	0.59587	0	0	2.344356831822996	5.904147368745129	DAXX;NPM1;SART3;SSRP1;NAP1L4
Protein N-linked Glycosylation (GO:0006487)	7/55	0.0811765	0.598563	0	0	1.9842977955150134	4.982828861709493	DPAGT1;DPM1;TMEM258;DAD1;RPN1;ALG3;DDOST
Protein Modification by Small Protein Conjugation (GO:0032446)	26/285	0.0845343	0.621576	0	0	1.3714753714753716	3.3883646759988615	VCP;GPS1;URM1;CCNF;CUL2;COPS7A;DTX4;CCAR1;PCNP;HERC4;TRIM28;TRIM27;RPS27A;TRIM21;USP7;FBXW5;ANAPC7;EIPR1;RANGAP1;UBAC1;PJA1;RNF126;UBE2V2;FAU;UBA52;SPSB4
Establishment of Protein Localization to Organelle (GO:0072594)	9/78	0.08599	0.630513	0	0	1.7757018633540373	4.356727648080232	IPO13;IPO11;NPM1;LAMP1;SIRT6;NUP88;KPNA2;PHB2;RAN
DNA-templated Transcription Elongation (GO:0006354)	4/25	0.0886177	0.63907	0	0	2.588744588744589	6.273624413238972	CDK9;CTDP1;ELOF1;CTR9
Cellular Response to Acid Chemical (GO:0071229)	4/25	0.0886177	0.63907	0	0	2.588744588744589	6.273624413238972	RRAGA;LAMTOR1;MTOR;LAMTOR5
Defense Response to Gram-negative Bacterium (GO:0050829)	4/25	0.0886177	0.63907	0	0	2.588744588744589	6.273624413238972	PNKD;RPS19;SERPINE1;LTF
Spindle Assembly Checkpoint Signaling (GO:0071173)	4/25	0.0886177	0.63907	0	0	2.588744588744589	6.273624413238972	CDC20;ZWILCH;TRIP13;MAD2L1
Mitotic Spindle Assembly Checkpoint Signaling (GO:0007094)	4/25	0.0886177	0.63907	0	0	2.588744588744589	6.273624413238972	CDC20;ZWILCH;TRIP13;MAD2L1
Mitotic Spindle Checkpoint Signaling (GO:0071174)	4/25	0.0886177	0.63907	0	0	2.588744588744589	6.273624413238972	CDC20;ZWILCH;TRIP13;MAD2L1
Regulation of Myeloid Cell Differentiation (GO:0045637)	3/16	0.0926787	0.655746	0	0	3.1348991530603336	7.456722255586181	EIF6;PRMT1;CTR9
Regulation of Ubiquitin Protein Ligase Activity (GO:1904666)	3/16	0.0926787	0.655746	0	0	3.1348991530603336	7.456722255586181	CDC20;RPL23;MAD2L1
Endoplasmic Reticulum to Cytosol Transport (GO:1903513)	3/16	0.0926787	0.655746	0	0	3.1348991530603336	7.456722255586181	VCP;SEC61B;HSP90B1
Establishment of Chromosome Localization (GO:0051303)	3/16	0.0926787	0.655746	0	0	3.1348991530603336	7.456722255586181	INCENP;GMNN;SKA3
Negative Regulation of Actin Filament Polymerization (GO:0030837)	3/16	0.0926787	0.655746	0	0	3.1348991530603336	7.456722255586181	TMSB4X;TWF2;PFN1
Oligodendrocyte Differentiation (GO:0048709)	3/16	0.0926787	0.655746	0	0	3.1348991530603336	7.456722255586181	EIF2B4;EIF2B2;EIF2B1
Positive Regulation of Transcription by RNA Polymerase III (GO:0045945)	3/16	0.0926787	0.655746	0	0	3.1348991530603336	7.456722255586181	ELL;DDX56;MTOR
Negative Regulation of Innate Immune Response (GO:0045824)	6/46	0.0932384	0.657932	0	0	2.04003416856492	4.8401768923426465	RPS19;BANF1;DTX4;TRIM21;LYAR;AURKB
Protein Ubiquitination (GO:0016567)	29/327	0.0941196	0.66237	0	0	1.3297499901879979	3.142449988934134	RNF10;VCP;CCNF;CUL2;AMBRA1;UBE2J2;PRPF19;DTX4;CCAR1;DDA1;PCNP;HERC4;RPS27A;TRIM21;USP7;FBXW5;ANAPC7;EIPR1;UBAC1;RNF41;PJA1;RNF167;RNF126;UBE2V2;UBE2O;FAU;UBA52;SPSB4;RNF187
Regulation of Interleukin-2 Production (GO:0032663)	4/26	0.0993176	0.663996	0	0	2.4708677685950415	5.706303461231467	STOML2;HOMER2;RPS3;TRIM27
Regulation of Nitric Oxide Biosynthetic Process (GO:0045428)	4/26	0.0993176	0.663996	0	0	2.4708677685950415	5.706303461231467	HSP90AA1;HSP90AB1;KHSRP;NOSIP
Regulation of Transcription by RNA Polymerase III (GO:0006359)	4/26	0.0993176	0.663996	0	0	2.4708677685950415	5.706303461231467	ELL;DDX56;MAF1;MTOR
Cellular Response to Virus (GO:0098586)	4/26	0.0993176	0.663996	0	0	2.4708677685950415	5.706303461231467	EIF5AL1;TOMM70;HSP90AA1;BAX
Mitochondrial Membrane Organization (GO:0007006)	4/26	0.0993176	0.663996	0	0	2.4708677685950415	5.706303461231467	CHCHD3;IMMT;SLC25A5;TIMM50
Organophosphate Biosynthetic Process (GO:0090407)	4/26	0.0993176	0.663996	0	0	2.4708677685950415	5.706303461231467	MOCS2;TPK1;TKT;GPHN
Protein Insertion Into ER Membrane (GO:0045048)	4/26	0.0993176	0.663996	0	0	2.4708677685950415	5.706303461231467	TMEM147;CCDC47;EMC10;NOMO1
Import Into Nucleus (GO:0051170)	8/69	0.0996423	0.663996	0	0	1.7845647129276143	4.115507616467549	IPO13;IPO11;NPM1;SIRT6;NUP88;KPNA2;PHB2;RAN
Regulation of Fatty Acid Metabolic Process (GO:0019217)	2/8	0.100169	0.663996	0	0	4.5256991685563115	10.413185614270905	EIF6;PRKAG2
R-loop Processing (GO:0062176)	2/8	0.100169	0.663996	0	0	4.5256991685563115	10.413185614270905	DDX23;DDX56
Regulation of Lamellipodium Organization (GO:1902743)	2/8	0.100169	0.663996	0	0	4.5256991685563115	10.413185614270905	TWF2;EPHA2
Regulation of Lysosome Organization (GO:1905671)	2/8	0.100169	0.663996	0	0	4.5256991685563115	10.413185614270905	LAPTM4B;MTOR
Cellular Response to Increased Oxygen Levels (GO:0036295)	2/8	0.100169	0.663996	0	0	4.5256991685563115	10.413185614270905	FASN;ATP6V0D1
Erythrocyte Development (GO:0048821)	2/8	0.100169	0.663996	0	0	4.5256991685563115	10.413185614270905	ALAS1;LYAR
Negative Regulation of Centrosome Duplication (GO:0010826)	2/8	0.100169	0.663996	0	0	4.5256991685563115	10.413185614270905	NPM1;CCNF
Negative Regulation of Fibrinolysis (GO:0051918)	2/8	0.100169	0.663996	0	0	4.5256991685563115	10.413185614270905	SERPINE1;USF1
Negative Regulation of Ubiquitin Protein Ligase Activity (GO:1904667)	2/8	0.100169	0.663996	0	0	4.5256991685563115	10.413185614270905	RPL23;MAD2L1
Peptide Antigen Assembly With MHC Protein Complex (GO:0002501)	2/8	0.100169	0.663996	0	0	4.5256991685563115	10.413185614270905	PDIA3;CALR
Positive Regulation of Leukocyte Activation (GO:0002696)	2/8	0.100169	0.663996	0	0	4.5256991685563115	10.413185614270905	TNIP2;HSPD1
Protein K29-linked Ubiquitination (GO:0035519)	2/8	0.100169	0.663996	0	0	4.5256991685563115	10.413185614270905	RNF167;RNF126
Protein Localization to Nucleolus (GO:1902570)	2/8	0.100169	0.663996	0	0	4.5256991685563115	10.413185614270905	RPF2;RAN
protein-RNA Complex Disassembly (GO:0032988)	2/8	0.100169	0.663996	0	0	4.5256991685563115	10.413185614270905	VCP;TRIM21
rRNA Pseudouridine Synthesis (GO:0031118)	2/8	0.100169	0.663996	0	0	4.5256991685563115	10.413185614270905	RPUSD4;NOP10
Regulation of Protein Secretion (GO:0050708)	7/58	0.101181	0.669019	0	0	1.8671048807208175	4.277242309882663	EIPR1;DPH3;ENSA;ERP29;SIRT6;PPIA;SLC25A22
Base-Excision Repair (GO:0006284)	5/37	0.107023	0.69209	0	0	2.1240401023890785	4.746625134571058	PARG;NTHL1;POLD1;RPS3;HMGA1
Erythrocyte Differentiation (GO:0030218)	5/37	0.107023	0.69209	0	0	2.1240401023890785	4.746625134571058	ATP5IF1;ALAS1;RPS19;SLC25A5;LYAR
Alpha-Amino Acid Catabolic Process (GO:1901606)	3/17	0.107043	0.69209	0	0	2.9107345548889247	6.504101121467115	MTRR;GOT2;HSD17B10
Response to Hexose (GO:0009746)	3/17	0.107043	0.69209	0	0	2.9107345548889247	6.504101121467115	EIF2B4;EIF2B2;EIF2B1
Glutamate Metabolic Process (GO:0006536)	3/17	0.107043	0.69209	0	0	2.9107345548889247	6.504101121467115	OAT;GOT2;ALDH18A1
Negative Regulation of Catalytic Activity (GO:0043086)	3/17	0.107043	0.69209	0	0	2.9107345548889247	6.504101121467115	ATP5IF1;NOSIP;PHPT1
Nuclear Chromosome Segregation (GO:0098813)	3/17	0.107043	0.69209	0	0	2.9107345548889247	6.504101121467115	INCENP;GMNN;SKA3
Positive Regulation of Mononuclear Cell Migration (GO:0071677)	3/17	0.107043	0.69209	0	0	2.9107345548889247	6.504101121467115	SERPINE1;CALR;RTN4
Protein Deacylation (GO:0035601)	3/17	0.107043	0.69209	0	0	2.9107345548889247	6.504101121467115	LYPLA2;HDAC3;SIRT6
Mitotic Spindle Organization (GO:0007052)	9/82	0.109069	0.698697	0	0	1.677839530332681	3.717721493522456	PLK3;NUDC;VCP;CCNB1;INCENP;PLK2;BCCIP;AURKB;RAN
Nuclear-Transcribed mRNA Catabolic Process (GO:0000956)	9/82	0.109069	0.698697	0	0	1.677839530332681	3.717721493522456	EXOSC5;CNOT11;EIF4A3;CNOT3;POLR2G;RNPS1;EXOSC3;PELO;GSPT1
Negative Regulation of Viral Process (GO:0048525)	6/48	0.10913	0.698697	0	0	1.9425642694435405	4.303202960580639	CSNK2B;BANF1;TRIM27;TRIM21;PPIA;LTF
Positive Regulation of TORC1 Signaling (GO:1904263)	6/48	0.10913	0.698697	0	0	1.9425642694435405	4.303202960580639	RNF167;RRAGA;PRMT1;LAMTOR1;OTUB1;LAMTOR5
mRNA Splice Site Recognition (GO:0006376)	4/27	0.110584	0.702864	0	0	2.3632411067193675	5.203809678798093	SF3A3;SF3A1;SNRPC;SRSF9
Negative Regulation of JNK Cascade (GO:0046329)	4/27	0.110584	0.702864	0	0	2.3632411067193675	5.203809678798093	PER1;HDAC3;PRMT1;GSTP1
Negative Regulation of Mitotic Metaphase/Anaphase Transition (GO:0045841)	4/27	0.110584	0.702864	0	0	2.3632411067193675	5.203809678798093	CDC20;ZWILCH;TRIP13;MAD2L1
Sensory Perception of Sound (GO:0007605)	7/60	0.115876	0.726242	0	0	1.796346894429982	3.871544040456284	NDUFB9;MKKS;HOMER2;TIMM13;MYH14;TBL1X;TPRN
COPII-coated Vesicle Budding (GO:0090114)	5/38	0.116671	0.726242	0	0	2.0595028786155067	4.424622413260566	TRAPPC2L;PEF1;TRAPPC4;TMED2;PREB
Negative Regulation of Proteasomal Protein Catabolic Process (GO:1901799)	5/38	0.116671	0.726242	0	0	2.0595028786155067	4.424622413260566	USP7;HSP90AB1;GIPC1;CSNK2B;PSMF1
Negative Regulation of Ubiquitin-Dependent Protein Catabolic Process (GO:2000059)	5/38	0.116671	0.726242	0	0	2.0595028786155067	4.424622413260566	USP7;HSP90AB1;RPL23;GIPC1;CSNK2B
Positive Regulation of Double-Strand Break Repair via Homologous Recombination (GO:1905168)	5/38	0.116671	0.726242	0	0	2.0595028786155067	4.424622413260566	RNF126;PRMT1;RUVBL2;MORF4L2;WRAP53
protein-DNA Complex Assembly (GO:0065004)	5/38	0.116671	0.726242	0	0	2.0595028786155067	4.424622413260566	DAXX;NPM1;SART3;SSRP1;NAP1L4
Regulation of DNA Repair (GO:0006282)	12/120	0.121646	0.726242	0	0	1.5128695208970437	3.1870686990353585	CDK9;SF3B5;PARG;TRIM28;RUVBL2;MORF4L2;UBE2V2;RPS3;TAF7;KAT7;SMARCA4;WRAP53
Retrograde Protein Transport, ER to Cytosol (GO:0030970)	3/18	0.122207	0.726242	0	0	2.7164585698070374	5.710107514338833	VCP;SEC61B;HSP90B1
Striated Muscle Tissue Development (GO:0014706)	3/18	0.122207	0.726242	0	0	2.7164585698070374	5.710107514338833	MYL6;PRMT1;MYH14
Maturation of 5.8S rRNA Frm Tricistronic rRNA Trnscpt (GO:0000466)	3/18	0.122207	0.726242	0	0	2.7164585698070374	5.710107514338833	PES1;EXOSC3;FTSJ3
Modulation by Host of Viral Process (GO:0044788)	3/18	0.122207	0.726242	0	0	2.7164585698070374	5.710107514338833	FASN;PPIB;LTF
Presynaptic Endocytosis (GO:0140238)	3/18	0.122207	0.726242	0	0	2.7164585698070374	5.710107514338833	CANX;AP2S1;AP2M1
rRNA Methylation (GO:0031167)	3/18	0.122207	0.726242	0	0	2.7164585698070374	5.710107514338833	FBL;MRM2;FTSJ3
Regulation of Receptor-Mediated Endocytosis (GO:0048259)	4/28	0.12239	0.726242	0	0	2.2645833333333334	4.7568554192701	HNRNPK;SERPINE1;APOC1;SMAP1
Negative Regulation of Proteasomal Ubiquitin-Dependent Protein Catabolic Process (GO:0032435)	4/28	0.12239	0.726242	0	0	2.2645833333333334	4.7568554192701	USP7;HSP90AB1;GIPC1;CSNK2B
Positive Regulation of Intrinsic Apoptotic Signaling Pathway (GO:2001244)	4/28	0.12239	0.726242	0	0	2.2645833333333334	4.7568554192701	BCAP31;EIF5AL1;MYC;RPS3
DNA Deamination (GO:0045006)	2/9	0.123115	0.726242	0	0	3.8788467768059607	8.12476653779325	EXOSC5;EXOSC3
Regulation of Mitotic Sister Chromatid Segregation (GO:0033047)	2/9	0.123115	0.726242	0	0	3.8788467768059607	8.12476653779325	CCNB1;AURKB
Regulation of Translation in Response to Endoplasmic Reticulum Stress (GO:0036490)	2/9	0.123115	0.726242	0	0	3.8788467768059607	8.12476653779325	EIF2S1;EIF4G1
Cellular Response to Leucine Starvation (GO:1990253)	2/9	0.123115	0.726242	0	0	3.8788467768059607	8.12476653779325	RNF167;MTOR
Endothelial Tube Morphogenesis (GO:0061154)	2/9	0.123115	0.726242	0	0	3.8788467768059607	8.12476653779325	CSNK2B;RHOB
tRNA 5'-Leader Removal (GO:0001682)	2/9	0.123115	0.726242	0	0	3.8788467768059607	8.12476653779325	POP7;SSB
Glycophagy (GO:0061723)	2/9	0.123115	0.726242	0	0	3.8788467768059607	8.12476653779325	WDR45B;ATG2A
Hydrogen Peroxide Catabolic Process (GO:0042744)	2/9	0.123115	0.726242	0	0	3.8788467768059607	8.12476653779325	GPX3;PRDX1
Isotype Switching (GO:0045190)	2/9	0.123115	0.726242	0	0	3.8788467768059607	8.12476653779325	EXOSC3;HSPD1
Lysosomal Membrane Organization (GO:0097212)	2/9	0.123115	0.726242	0	0	3.8788467768059607	8.12476653779325	LAPTM4B;CHMP1A
Maintenance of Protein Localization in Endoplasmic Reticulum (GO:0035437)	2/9	0.123115	0.726242	0	0	3.8788467768059607	8.12476653779325	HSPA5;GPAA1
Negative Regulation of Cardiac Muscle Hypertrophy (GO:0010614)	2/9	0.123115	0.726242	0	0	3.8788467768059607	8.12476653779325	GLRX3;LMNA
Negative Regulation of Lyase Activity (GO:0051350)	2/9	0.123115	0.726242	0	0	3.8788467768059607	8.12476653779325	MTRR;PHPT1
Peptidyl-Threonine Dephosphorylation (GO:0035970)	2/9	0.123115	0.726242	0	0	3.8788467768059607	8.12476653779325	PPP5C;PPM1G
Protein K27-linked Ubiquitination (GO:0044314)	2/9	0.123115	0.726242	0	0	3.8788467768059607	8.12476653779325	RNF126;TRIM21
Regulation of ATP Biosynthetic Process (GO:2001169)	2/9	0.123115	0.726242	0	0	3.8788467768059607	8.12476653779325	VCP;TMSB4X
Positive Regulation of TOR Signaling (GO:0032008)	7/62	0.131618	0.763957	0	0	1.730734943505753	3.5096673878042486	RNF167;RRAGA;HDAC3;PRMT1;LAMTOR1;OTUB1;LAMTOR5
Regulation of Dendritic Cell Chemotaxis (GO:2000508)	1/2	0.13271	0.763957	0	0	13.567383918459797	27.40051597464444	CALR
Regulation of Morphogenesis of a Branching Structure (GO:0060688)	1/2	0.13271	0.763957	0	0	13.567383918459797	27.40051597464444	RTN4
Aromatic Amino Acid Metabolic Process (GO:0009072)	1/2	0.13271	0.763957	0	0	13.567383918459797	27.40051597464444	THAP4
Sperm Mitochondrial Sheath Assembly (GO:0120317)	1/2	0.13271	0.763957	0	0	13.567383918459797	27.40051597464444	VDAC3
Gamma-Aminobutyric Acid Import (GO:0051939)	1/2	0.13271	0.763957	0	0	13.567383918459797	27.40051597464444	SLC7A14
Lipoprotein Metabolic Process (GO:0042157)	1/2	0.13271	0.763957	0	0	13.567383918459797	27.40051597464444	CTSD
Negative Regulation of Acute Inflammatory Response (GO:0002674)	1/2	0.13271	0.763957	0	0	13.567383918459797	27.40051597464444	GSTP1
Positive Regulation of Dendritic Cell Chemotaxis (GO:2000510)	1/2	0.13271	0.763957	0	0	13.567383918459797	27.40051597464444	CALR
Positive Regulation of Multicellular Organism Growth (GO:0040018)	1/2	0.13271	0.763957	0	0	13.567383918459797	27.40051597464444	PPIB
Positive Regulation of Respiratory Burst (GO:0060267)	1/2	0.13271	0.763957	0	0	13.567383918459797	27.40051597464444	RPS19
Regulation of Mitochondrial Membrane Potential (GO:0051881)	4/29	0.134706	0.770378	0	0	2.1738181818181816	4.357765896158779	ATP5IF1;VCP;TUSC2;BAX
Nucleobase-Containing Compound Metabolic Process (GO:0006139)	4/29	0.134706	0.770378	0	0	2.1738181818181816	4.357765896158779	ATIC;TPMT;ERH;NUDT5
Pyruvate Metabolic Process (GO:0006090)	4/29	0.134706	0.770378	0	0	2.1738181818181816	4.357765896158779	PDHA1;VDAC1;DLAT;GAPDH
Positive Regulation of DNA Metabolic Process (GO:0051054)	10/98	0.135122	0.770795	0	0	1.5463126690243396	3.095062225843954	CDT1;TRIM28;MYC;RUVBL2;RPS3;KAT7;SIRT6;AURKB;WRAP53;GNL3
Positive Regulation of Type I Interferon Production (GO:0032481)	6/51	0.135366	0.770795	0	0	1.8126044039483675	3.624794395211187	TOMM70;HSP90AA1;KPNA2;GAPDH;PQBP1;HSPD1
Positive Regulation of miRNA Metabolic Process (GO:2000630)	5/40	0.137142	0.774576	0	0	1.9414919551438323	3.8572306254552027	JUN;MYC;HRAS;GNL3;SMARCA4
Alternative mRNA Splicing, via Spliceosome (GO:0000380)	3/19	0.138096	0.774576	0	0	2.546467082860386	5.041514580236583	RBM17;PQBP1;SRSF9
Regulation of Protein Localization to Cell Periphery (GO:1904375)	3/19	0.138096	0.774576	0	0	2.546467082860386	5.041514580236583	ZDHHC7;SIRT6;EIF4G1
Regulation of Protein Neddylation (GO:2000434)	3/19	0.138096	0.774576	0	0	2.546467082860386	5.041514580236583	GPS1;COPS7A;COPS9
Regulation of Vacuole Organization (GO:0044088)	3/19	0.138096	0.774576	0	0	2.546467082860386	5.041514580236583	LAPTM4B;RAB1B;MTOR
snRNA 3'-End Processing (GO:0034472)	3/19	0.138096	0.774576	0	0	2.546467082860386	5.041514580236583	EXOSC5;EXOSC3;INTS8
Endoplasmic Reticulum Calcium Ion Homeostasis (GO:0032469)	3/19	0.138096	0.774576	0	0	2.546467082860386	5.041514580236583	CCDC47;RAP1GDS1;BAX
Transcription Initiation at RNA Polymerase II Promoter (GO:0006367)	10/99	0.14166	0.782206	0	0	1.5288098115342093	2.9877911725788353	CDK9;WDR5;ELOA;TAF7;KAT7;ELOB;POLR2G;NOC2L;POLR2I;SMARCA4
Negative Regulation of Gene Expression, Epigenetic (GO:0045814)	8/75	0.141874	0.782206	0	0	1.6239351189259184	3.1712460663401103	USP7;MYC;LMNA;SIRT6;TRIM27;PPHLN1;LMNB2;SMARCA4
Regulation of Stem Cell Population Maintenance (GO:2000036)	6/52	0.144717	0.782206	0	0	1.7730514014063583	3.427263184185651	MYC;CNOT3;SIRT6;ELAVL1;WDR43;SMARCA4
Regulation of Telomere Maintenance (GO:0032204)	6/52	0.144717	0.782206	0	0	1.7730514014063583	3.427263184185651	USP7;MYC;LMNA;SIRT6;AURKB;GNL3
Negative Regulation of Protein Modification by Small Protein Conjugation or Removal (GO:1903321)	6/52	0.144717	0.782206	0	0	1.7730514014063583	3.427263184185651	BEX3;BEX2;RPS3;TRIM21;GTPBP4;COPS9
acetyl-CoA Biosynthetic Process (GO:0006085)	2/10	0.147159	0.782206	0	0	3.3937074829931975	6.503159703011872	PDHA1;DLAT
Regulation of Multicellular Organism Growth (GO:0040014)	2/10	0.147159	0.782206	0	0	3.3937074829931975	6.503159703011872	GDF15;PPIB
Aspartate Transmembrane Transport (GO:0015810)	2/10	0.147159	0.782206	0	0	3.3937074829931975	6.503159703011872	SLC25A22;SLC25A13
Regulation of Purine Nucleotide Catabolic Process (GO:0033121)	2/10	0.147159	0.782206	0	0	3.3937074829931975	6.503159703011872	EIF6;PRKAG2
Cellular Response to Cadmium Ion (GO:0071276)	2/10	0.147159	0.782206	0	0	3.3937074829931975	6.503159703011872	DAXX;HSF1
Cellular Response to Copper Ion (GO:0071280)	2/10	0.147159	0.782206	0	0	3.3937074829931975	6.503159703011872	DAXX;HSF1
Removal of Superoxide Radicals (GO:0019430)	2/10	0.147159	0.782206	0	0	3.3937074829931975	6.503159703011872	NQO1;PRDX1
Respiratory Electron Transport Chain (GO:0022904)	2/10	0.147159	0.782206	0	0	3.3937074829931975	6.503159703011872	UQCRFS1;SDHB
Cellular Response to Superoxide (GO:0071451)	2/10	0.147159	0.782206	0	0	3.3937074829931975	6.503159703011872	NQO1;PRDX1
Cristae Formation (GO:0042407)	2/10	0.147159	0.782206	0	0	3.3937074829931975	6.503159703011872	CHCHD3;IMMT
tRNA 5'-End Processing (GO:0099116)	2/10	0.147159	0.782206	0	0	3.3937074829931975	6.503159703011872	POP7;SSB
Mitochondrial Protein Processing (GO:0034982)	2/10	0.147159	0.782206	0	0	3.3937074829931975	6.503159703011872	STOML2;PMPCA
Negative Regulation of Gene Expression via Chromosomal CpG Island Methylation (GO:0044027)	2/10	0.147159	0.782206	0	0	3.3937074829931975	6.503159703011872	USP7;MYC
Negative Regulation of Ubiquitin-Protein Transferase Activity (GO:0051444)	2/10	0.147159	0.782206	0	0	3.3937074829931975	6.503159703011872	RPL23;MAD2L1
Oxoacid Metabolic Process (GO:0043436)	2/10	0.147159	0.782206	0	0	3.3937074829931975	6.503159703011872	THAP4;TPST2
Positive Regulation of Attachment of Spindle Microtubules to Kinetochore (GO:0051987)	2/10	0.147159	0.782206	0	0	3.3937074829931975	6.503159703011872	CCNB1;INCENP
Positive Regulation of Mitotic Cell Cycle Spindle Assembly Checkpoint (GO:0090267)	2/10	0.147159	0.782206	0	0	3.3937074829931975	6.503159703011872	INCENP;MAD2L1
Positive Regulation of Ruffle Assembly (GO:1900029)	2/10	0.147159	0.782206	0	0	3.3937074829931975	6.503159703011872	PFN1;HRAS
Protein Deneddylation (GO:0000338)	2/10	0.147159	0.782206	0	0	3.3937074829931975	6.503159703011872	GPS1;COPS7A
Antimicrobial Humoral Immune Response Mediated by Antimicrobial Peptide (GO:0061844)	4/30	0.147502	0.782206	0	0	2.090034965034965	4.000151439712067	RPS19;FAU;GAPDH;LTF
Regulation of Protein Polymerization (GO:0032271)	4/30	0.147502	0.782206	0	0	2.090034965034965	4.000151439712067	HSP90AA1;COTL1;PFN1;GBA2
Synaptic Vesicle Recycling (GO:0036465)	4/30	0.147502	0.782206	0	0	2.090034965034965	4.000151439712067	CANX;AP2S1;AP3D1;AP2M1
Chromatin Organization (GO:0006325)	23/266	0.150639	0.797235	0	0	1.2903648260468494	2.4424883663738557	PRMT5;DAXX;NPM1;PRMT7;HDAC3;PRMT1;DDX56;SIRT6;LRWD1;SSRP1;NUDT5;NPM3;SAFB;IWS1;SMARCA4;NAP1L4;PER1;SART3;TRIM28;MYC;RUVBL2;KAT7;BANF1
DNA Metabolic Process (GO:0006259)	23/267	0.154779	0.817495	0	0	1.2849669655947145	2.397434886793802	XRCC6;NPM1;VCP;SET;RNASEH2A;PARG;RFC2;LRWD1;HNRNPAB;REXO4;NT5E;TRIM28;NTHL1;ALKBH1;RAD21;RUVBL2;POLD1;POLD2;RPS3;UBE2V2;SSBP1;KPNA2;RAN
Cellular Response to Amino Acid Starvation (GO:0034198)	5/42	0.15907	0.836792	0	0	1.8362389693447714	3.375759336216589	RNF167;RRAGA;FASN;EIF2S1;MTOR
Negative Regulation of Protein Catabolic Process (GO:0042177)	5/42	0.15907	0.836792	0	0	1.8362389693447714	3.375759336216589	NQO1;HSP90AB1;SNRNP70;PSMF1;MAD2L1
Substantia Nigra Development (GO:0021762)	4/31	0.160744	0.842222	0	0	2.0124579124579123	3.678655535737233	YWHAQ;HSPA5;YWHAH;COX6B1
Regulation of Apoptotic Signaling Pathway (GO:2001233)	4/31	0.160744	0.842222	0	0	2.0124579124579123	3.678655535737233	FASN;RPS3;TMBIM6;PPIA
Cell Cycle G2/M Phase Transition (GO:0044839)	5/43	0.170536	0.84571	0	0	1.7877671995688882	3.1622171265009946	CCNA2;PLK3;CCNB1;ENSA;AURKB
Positive Regulation of Intracellular Transport (GO:0032388)	5/43	0.170536	0.84571	0	0	1.7877671995688882	3.1622171265009946	EHD1;PLK3;EIPR1;PTPN23;OAZ1
Regulation of Blood Vessel Endothelial Cell Migration (GO:0043535)	5/43	0.170536	0.84571	0	0	1.7877671995688882	3.1622171265009946	ATP5F1A;ATP5F1B;TMSB4X;CSNK2B;EPHA2
tRNA Metabolic Process (GO:0006399)	3/21	0.171754	0.84571	0	0	2.2631479379493	3.9869682181672044	POP7;SSB;LAGE3
Extrinsic Apoptotic Signaling Pathway via Death Domain Receptors (GO:0008625)	3/21	0.171754	0.84571	0	0	2.2631479379493	3.9869682181672044	DAXX;FASN;BAX
Heart Looping (GO:0001947)	3/21	0.171754	0.84571	0	0	2.2631479379493	3.9869682181672044	MKKS;SMOX;DVL2
Neuron Apoptotic Process (GO:0051402)	3/21	0.171754	0.84571	0	0	2.2631479379493	3.9869682181672044	DAXX;FASN;GAPDH
C4-dicarboxylate Transport (GO:0015740)	2/11	0.172042	0.84571	0	0	3.016376921138826	5.308879251860659	SLC25A22;SLC25A13
Reg of Intrinsic Apoptotic Sgnlng Pway in Resp to DNA Damage by P53 Cls Mediator (GO:1902165)	2/11	0.172042	0.84571	0	0	3.016376921138826	5.308879251860659	TRIAP1;RPL26
SRP-dependent Cotranslational Protein Targeting to Membrane (GO:0006614)	2/11	0.172042	0.84571	0	0	3.016376921138826	5.308879251860659	SEC61B;SRP68
T Cell Homeostasis (GO:0043029)	2/11	0.172042	0.84571	0	0	3.016376921138826	5.308879251860659	PPP2R1A;FASN
Base-Excision Repair, Gap-Filling (GO:0006287)	2/11	0.172042	0.84571	0	0	3.016376921138826	5.308879251860659	PARG;POLD1
Calcium Import Into the Mitochondrion (GO:0036444)	2/11	0.172042	0.84571	0	0	3.016376921138826	5.308879251860659	VDAC1;MCU
Response to Fatty Acid (GO:0070542)	2/11	0.172042	0.84571	0	0	3.016376921138826	5.308879251860659	PPP5C;SCD
Suppression of Viral Release by Host (GO:0044790)	2/11	0.172042	0.84571	0	0	3.016376921138826	5.308879251860659	TRIM28;TRIM21
Establishment of Protein Localization to Chromosome (GO:0070199)	2/11	0.172042	0.84571	0	0	3.016376921138826	5.308879251860659	RUVBL2;LRWD1
Long-Chain Fatty Acid Biosynthetic Process (GO:0042759)	2/11	0.172042	0.84571	0	0	3.016376921138826	5.308879251860659	GSTM4;GSTP1
Meiotic Sister Chromatid Cohesion (GO:0051177)	2/11	0.172042	0.84571	0	0	3.016376921138826	5.308879251860659	PPP2R1A;RAD21
Negative Regulation by Host of Viral Process (GO:0044793)	2/11	0.172042	0.84571	0	0	3.016376921138826	5.308879251860659	PSMC3;LTF
Negative Regulation of cGAS/STING Signaling Pathway (GO:0160049)	2/11	0.172042	0.84571	0	0	3.016376921138826	5.308879251860659	BANF1;AURKB
Negative Regulation of Gluconeogenesis (GO:0045721)	2/11	0.172042	0.84571	0	0	3.016376921138826	5.308879251860659	USP7;SIRT6
Negative Regulation of Interleukin-2 Production (GO:0032703)	2/11	0.172042	0.84571	0	0	3.016376921138826	5.308879251860659	HOMER2;TRIM27
Negative Regulation of Stem Cell Differentiation (GO:2000737)	2/11	0.172042	0.84571	0	0	3.016376921138826	5.308879251860659	TMSB4X;NELFB
Nitric Oxide Biosynthetic Process (GO:0006809)	2/11	0.172042	0.84571	0	0	3.016376921138826	5.308879251860659	CYB5B;NQO1
Positive Regulation of DNA-templated DNA Replication (GO:2000105)	2/11	0.172042	0.84571	0	0	3.016376921138826	5.308879251860659	CDT1;SSBP1
Positive Regulation of Metaphase/Anaphase Transition of Cell Cycle (GO:1902101)	2/11	0.172042	0.84571	0	0	3.016376921138826	5.308879251860659	CDC20;ANAPC7
Positive Regulation of Mitotic Cytokinesis (GO:1903490)	2/11	0.172042	0.84571	0	0	3.016376921138826	5.308879251860659	INCENP;AURKB
Positive Regulation of Nuclear-Transcribed mRNA poly(A) Tail Shortening (GO:0060213)	2/11	0.172042	0.84571	0	0	3.016376921138826	5.308879251860659	POLR2G;PABPC1
Positive Regulation of Spindle Checkpoint (GO:0090232)	2/11	0.172042	0.84571	0	0	3.016376921138826	5.308879251860659	INCENP;MAD2L1
Programmed Necrotic Cell Death (GO:0097300)	2/11	0.172042	0.84571	0	0	3.016376921138826	5.308879251860659	ITPK1;PGAM5
Purine Ribonucleotide Catabolic Process (GO:0009154)	2/11	0.172042	0.84571	0	0	3.016376921138826	5.308879251860659	HINT1;NT5E
Regulation of Attachment of Spindle Microtubules to Kinetochore (GO:0051988)	2/11	0.172042	0.84571	0	0	3.016376921138826	5.308879251860659	ZWILCH;KNSTRN
Regulation of Cellular Respiration (GO:0043457)	2/11	0.172042	0.84571	0	0	3.016376921138826	5.308879251860659	VCP;IDE
Regulation of DNA-templated Transcription Elongation (GO:0032784)	4/32	0.1744	0.851441	0	0	1.940422077922078	3.3887591248515267	ELL;KAT7;INTS8;WDR43
Positive Regulation of Cold-Induced Thermogenesis (GO:0120162)	7/67	0.17523	0.851441	0	0	1.5858418852147473	2.7619906198843167	HDAC3;SCD;CNOT3;HSF1;SIRT6;GPR3;SMARCA4
Negative Regulation of Catabolic Process (GO:0009895)	9/92	0.180037	0.851441	0	0	1.4744509466437177	2.528081642060728	NQO1;RRAGA;RPL23;APOC1;ZDHHC7;TRIM27;MTOR;EIF4G1;MAD2L1
Signal Transduction by P53 Class Mediator (GO:0072331)	5/44	0.182311	0.851441	0	0	1.7417811615763834	2.964579751295885	HINT1;TRIAP1;RPL26;GTSE1;RRP8
Nuclear Export (GO:0051168)	5/44	0.182311	0.851441	0	0	1.7417811615763834	2.964579751295885	RANBP3;ALYREF;CALR;RANGAP1;RAN
GPI Anchor Biosynthetic Process (GO:0006506)	3/22	0.189376	0.851441	0	0	2.14385566640779	3.567419849409054	DPM1;DPM2;PIGH
GPI Anchor Metabolic Process (GO:0006505)	3/22	0.189376	0.851441	0	0	2.14385566640779	3.567419849409054	DPM1;DPM2;PIGH
Chaperone Cofactor-Dependent Protein Refolding (GO:0051085)	3/22	0.189376	0.851441	0	0	2.14385566640779	3.567419849409054	HSPA5;DNAJC7;HSPE1
Vacuolar Acidification (GO:0007035)	3/22	0.189376	0.851441	0	0	2.14385566640779	3.567419849409054	LAMP1;ATP6V0D1;ATP6V1F
Negative Regulation of Hydrolase Activity (GO:0051346)	3/22	0.189376	0.851441	0	0	2.14385566640779	3.567419849409054	ATP5IF1;TMED2;HRAS
Negative Regulation of Myeloid Leukocyte Differentiation (GO:0002762)	3/22	0.189376	0.851441	0	0	2.14385566640779	3.567419849409054	TNFAIP6;MYC;TCTA
Negative Regulation of Tumor Necrosis Factor Superfamily Cytokine Production (GO:1903556)	3/22	0.189376	0.851441	0	0	2.14385566640779	3.567419849409054	GSTP1;TRIM27;LTF
Positive Regulation of Cell Cycle G2/M Phase Transition (GO:1902751)	3/22	0.189376	0.851441	0	0	2.14385566640779	3.567419849409054	NPM1;CCNB1;CDK4
Positive Regulation of Defense Response to Virus by Host (GO:0002230)	3/22	0.189376	0.851441	0	0	2.14385566640779	3.567419849409054	TOMM70;HSP90AA1;PQBP1
Positive Regulation of Viral Genome Replication (GO:0045070)	3/22	0.189376	0.851441	0	0	2.14385566640779	3.567419849409054	STAU1;PABPC1;PPIA
Postreplication Repair (GO:0006301)	3/22	0.189376	0.851441	0	0	2.14385566640779	3.567419849409054	VCP;UBE2V2;WDR33
Protein Export From Nucleus (GO:0006611)	3/22	0.189376	0.851441	0	0	2.14385566640779	3.567419849409054	RANBP3;CALR;RAN
'De Novo' AMP Biosynthetic Process (GO:0044208)	1/3	0.192314	0.851441	0	0	6.7831257078142695	11.182836812580357	ATIC
CD4-positive, Alpha-Beta T Cell Activation (GO:0035710)	1/3	0.192314	0.851441	0	0	6.7831257078142695	11.182836812580357	STOML2
L-phenylalanine Catabolic Process (GO:0006559)	1/3	0.192314	0.851441	0	0	6.7831257078142695	11.182836812580357	FAH
L-phenylalanine Metabolic Process (GO:0006558)	1/3	0.192314	0.851441	0	0	6.7831257078142695	11.182836812580357	FAH
Regulation of Monocyte Chemotactic Protein-1 Production (GO:0071637)	1/3	0.192314	0.851441	0	0	6.7831257078142695	11.182836812580357	GSTP1
Regulation of Osteoclast Development (GO:2001204)	1/3	0.192314	0.851441	0	0	6.7831257078142695	11.182836812580357	LTF
Regulation of Protein Polyubiquitination (GO:1902914)	1/3	0.192314	0.851441	0	0	6.7831257078142695	11.182836812580357	SPSB4
Response to Bile Acid (GO:1903412)	1/3	0.192314	0.851441	0	0	6.7831257078142695	11.182836812580357	ALAS1
Cholesterol Catabolic Process (GO:0006707)	1/3	0.192314	0.851441	0	0	6.7831257078142695	11.182836812580357	SNX17
Defense Response to Symbiont (GO:0140546)	1/3	0.192314	0.851441	0	0	6.7831257078142695	11.182836812580357	GAPDH
Ear Development (GO:0043583)	1/3	0.192314	0.851441	0	0	6.7831257078142695	11.182836812580357	SHROOM2
Sterol Catabolic Process (GO:0016127)	1/3	0.192314	0.851441	0	0	6.7831257078142695	11.182836812580357	SNX17
Thiamine Transmembrane Transport (GO:0071934)	1/3	0.192314	0.851441	0	0	6.7831257078142695	11.182836812580357	SLC25A19
Gamma-Aminobutyric Acid Transport (GO:0015812)	1/3	0.192314	0.851441	0	0	6.7831257078142695	11.182836812580357	SLC7A14
Glucocorticoid Metabolic Process (GO:0008211)	1/3	0.192314	0.851441	0	0	6.7831257078142695	11.182836812580357	YWHAH
Glycoside Catabolic Process (GO:0016139)	1/3	0.192314	0.851441	0	0	6.7831257078142695	11.182836812580357	GBA2
Glycosyl Compound Catabolic Process (GO:1901658)	1/3	0.192314	0.851441	0	0	6.7831257078142695	11.182836812580357	GBA2
Inner Dynein Arm Assembly (GO:0036159)	1/3	0.192314	0.851441	0	0	6.7831257078142695	11.182836812580357	DNAAF5
Multinuclear Osteoclast Differentiation (GO:0072674)	1/3	0.192314	0.851441	0	0	6.7831257078142695	11.182836812580357	TCTA
Negative Regulation of Cardiac Muscle Adaptation (GO:0010616)	1/3	0.192314	0.851441	0	0	6.7831257078142695	11.182836812580357	LMNA
Negative Regulation of Cardiac Muscle Hypertrophy in Response to Stress (GO:1903243)	1/3	0.192314	0.851441	0	0	6.7831257078142695	11.182836812580357	LMNA
Negative Regulation of Lipase Activity (GO:0060192)	1/3	0.192314	0.851441	0	0	6.7831257078142695	11.182836812580357	APOC1
Negative Regulation of Meiotic Nuclear Division (GO:0045835)	1/3	0.192314	0.851441	0	0	6.7831257078142695	11.182836812580357	TRIP13
Negative Regulation of Myeloid Cell Apoptotic Process (GO:0033033)	1/3	0.192314	0.851441	0	0	6.7831257078142695	11.182836812580357	MAEA
Negative Regulation of Response to Food (GO:0032096)	1/3	0.192314	0.851441	0	0	6.7831257078142695	11.182836812580357	GDF15
Phospholipase C-activating Dopamine Receptor Signaling Pathway (GO:0060158)	1/3	0.192314	0.851441	0	0	6.7831257078142695	11.182836812580357	GNA11
Phospholipid Efflux (GO:0033700)	1/3	0.192314	0.851441	0	0	6.7831257078142695	11.182836812580357	APOC1
Polyamine Transport (GO:0015846)	1/3	0.192314	0.851441	0	0	6.7831257078142695	11.182836812580357	TAF7
Positive Regulation of Cholesterol Storage (GO:0010886)	1/3	0.192314	0.851441	0	0	6.7831257078142695	11.182836812580357	EHD1
Positive Regulation of Melanin Biosynthetic Process (GO:0048023)	1/3	0.192314	0.851441	0	0	6.7831257078142695	11.182836812580357	GIPC1
Positive Regulation of Secondary Metabolite Biosynthetic Process (GO:1900378)	1/3	0.192314	0.851441	0	0	6.7831257078142695	11.182836812580357	GIPC1
Regulation of Cardiac Muscle Hypertrophy in Response to Stress (GO:1903242)	1/3	0.192314	0.851441	0	0	6.7831257078142695	11.182836812580357	LMNA
Regulation of Cell Division (GO:0051302)	7/69	0.194216	0.851441	0	0	1.5344282193695515	2.514597454059756	PLK3;MYC;WDR5;CDK2AP2;ENTR1;AURKB;KAT14
Negative Regulation of Binding (GO:0051100)	5/45	0.194376	0.851441	0	0	1.698094425483504	2.781411072408961	JUN;SMOX;CPNE1;BAX;GTPBP4
Positive Regulation of Cell Cycle (GO:0045787)	5/45	0.194376	0.851441	0	0	1.698094425483504	2.781411072408961	CCNB1;HSF1;CALR;TRIM21;USP19
Positive Regulation of Chromosome Organization (GO:2001252)	5/45	0.194376	0.851441	0	0	1.698094425483504	2.781411072408961	MYC;RAD21;SIRT6;AURKB;GNL3
Negative Regulation of MAPK Cascade (GO:0043409)	9/94	0.196284	0.851441	0	0	1.4395159663865547	2.343808728439373	PER1;UCHL1;HDAC3;PRMT1;MYC;GSTP1;PEBP1;DUSP8;PPIA
Regulation of RNA Splicing (GO:0043484)	9/94	0.196284	0.851441	0	0	1.4395159663865547	2.343808728439373	HNRNPL;RPS26;SF3B5;HNRNPK;SNRNP70;TMBIM6;AKAP17A;RPS13;PQBP1
Regulation of MAPK Cascade (GO:0043408)	15/171	0.197427	0.851441	0	0	1.3084225900681596	2.1227643046027582	SMIM29;GDF15;GSTP1;PEBP1;DUSP8;PHB2;RNF41;MYDGF;PER1;FASN;ERP29;LAMTOR1;HRAS;PPIA;EPHA2
Regulation of Execution Phase of Apoptosis (GO:1900117)	2/12	0.197534	0.851441	0	0	2.7145124716553286	4.4025125318716745	DFFA;HSPD1
Regulation of Exit From Mitosis (GO:0007096)	2/12	0.197534	0.851441	0	0	2.7145124716553286	4.4025125318716745	CDCA5;PHB2
Response to Nerve Growth Factor (GO:1990089)	2/12	0.197534	0.851441	0	0	2.7145124716553286	4.4025125318716745	EHD1;RAPGEF1
Defense Response to Fungus (GO:0050832)	2/12	0.197534	0.851441	0	0	2.7145124716553286	4.4025125318716745	GAPDH;LTF
Signal Peptide Processing (GO:0006465)	2/12	0.197534	0.851441	0	0	2.7145124716553286	4.4025125318716745	SPCS1;SEC11C
Steroid Biosynthetic Process (GO:0006694)	2/12	0.197534	0.851441	0	0	2.7145124716553286	4.4025125318716745	SQLE;PRKAG2
Estrogen Receptor Signaling Pathway (GO:0030520)	2/12	0.197534	0.851441	0	0	2.7145124716553286	4.4025125318716745	DDX54;SAFB
Hydrogen Peroxide Metabolic Process (GO:0042743)	2/12	0.197534	0.851441	0	0	2.7145124716553286	4.4025125318716745	GPX3;PRDX1
Mitochondrial Transcription (GO:0006390)	2/12	0.197534	0.851441	0	0	2.7145124716553286	4.4025125318716745	TWNK;MRPL12
Negative Regulation of GTPase Activity (GO:0034260)	2/12	0.197534	0.851441	0	0	2.7145124716553286	4.4025125318716745	TMED2;HRAS
Negative Regulation of Endopeptidase Activity (GO:0010951)	2/12	0.197534	0.851441	0	0	2.7145124716553286	4.4025125318716745	SERPINE1;GAPDH
Negative Regulation of Myeloid Cell Differentiation (GO:0045638)	2/12	0.197534	0.851441	0	0	2.7145124716553286	4.4025125318716745	PRMT1;CTR9
Negative Regulation of Peptidase Activity (GO:0010466)	2/12	0.197534	0.851441	0	0	2.7145124716553286	4.4025125318716745	SERPINE1;GAPDH
Negative Regulation of Viral Transcription (GO:0032897)	2/12	0.197534	0.851441	0	0	2.7145124716553286	4.4025125318716745	TRIM27;TRIM21
Positive Regulation of Exosomal Secretion (GO:1903543)	2/12	0.197534	0.851441	0	0	2.7145124716553286	4.4025125318716745	HGS;RAB7A
Post-Translational Protein Targeting to Endoplasmic Reticulum Membrane (GO:0006620)	2/12	0.197534	0.851441	0	0	2.7145124716553286	4.4025125318716745	HSPA5;SEC61B
Postsynaptic Membrane Organization (GO:0001941)	2/12	0.197534	0.851441	0	0	2.7145124716553286	4.4025125318716745	DNAJA3;GPHN
Protein Insertion Into Mitochondrial Inner Membrane (GO:0045039)	2/12	0.197534	0.851441	0	0	2.7145124716553286	4.4025125318716745	TOMM70;TIMM13
Regulation of Carbohydrate Catabolic Process (GO:0043470)	2/12	0.197534	0.851441	0	0	2.7145124716553286	4.4025125318716745	EIF6;PRKAG2
DNA Repair (GO:0006281)	23/277	0.199571	0.85637	0	0	1.2333260171746825	1.98760835169349	XRCC6;NPM1;USP7;VCP;RNASEH2A;CENPX;RFC2;CDCA5;DDX1;HMGA1;SIRT6;WRNIP1;REXO4;WDR33;PPP5C;TRIM28;NTHL1;ALKBH1;RAD21;POLD1;RPS3;UBE2V2;TRIP13
NADH Dehydrogenase Complex Assembly (GO:0010257)	4/34	0.202816	0.85637	0	0	1.8107575757575758	2.888987183752736	DMAC1;NDUFS1;TIMM21;FOXRED1
Regulation of Lipid Metabolic Process (GO:0019216)	4/34	0.202816	0.85637	0	0	1.8107575757575758	2.888987183752736	APOC1;PRKAG2;EDF1;SIRT6
Inner Mitochondrial Membrane Organization (GO:0007007)	4/34	0.202816	0.85637	0	0	1.8107575757575758	2.888987183752736	TOMM70;CHCHD3;TIMM13;IMMT
Mitochondrial Respiratory Chain Complex I Assembly (GO:0032981)	4/34	0.202816	0.85637	0	0	1.8107575757575758	2.888987183752736	DMAC1;NDUFS1;TIMM21;FOXRED1
Negative Regulation of Double-Strand Break Repair (GO:2000780)	4/34	0.202816	0.85637	0	0	1.8107575757575758	2.888987183752736	HSF1;AUNIP;SENP3;OTUB1
Nuclear Receptor-Mediated Steroid Hormone Signaling Pathway (GO:0030518)	4/34	0.202816	0.85637	0	0	1.8107575757575758	2.888987183752736	DAXX;DDX54;ZDHHC7;SAFB
Positive Regulation of Gene Expression, Epigenetic (GO:0141137)	4/34	0.202816	0.85637	0	0	1.8107575757575758	2.888987183752736	WDR5;KAT7;NOC2L;SMARCA4
Positive Regulation of miRNA Transcription (GO:1902895)	4/34	0.202816	0.85637	0	0	1.8107575757575758	2.888987183752736	JUN;MYC;GNL3;SMARCA4
Sensory Perception of Mechanical Stimulus (GO:0050954)	6/58	0.206412	0.85637	0	0	1.5676800420536183	2.473616486710933	NDUFB9;HOMER2;TIMM13;MYH14;TBL1X;TPRN
Cellular Response to Ionizing Radiation (GO:0071479)	5/46	0.20671	0.85637	0	0	1.656538749687838	2.611431329190902	XRCC6;HSF1;RPL26;HRAS;RHOB
Positive Regulation of Apoptotic Signaling Pathway (GO:2001235)	5/46	0.20671	0.85637	0	0	1.656538749687838	2.611431329190902	BCAP31;TNFRSF12A;FASN;RPS3;BAX
Regulation of Macromolecule Biosynthetic Process (GO:0010556)	10/108	0.207367	0.85637	0	0	1.3873581469200953	2.182684254472935	TCF19;DAXX;SART3;CDK4;MYC;KAT7;MITF;TARDBP;TRIM21;HNRNPAB
Determination of Heart Left/Right Asymmetry (GO:0061371)	3/23	0.20743	0.85637	0	0	2.036492622020431	3.203319443771725	MKKS;SMOX;DVL2
Mitochondrial RNA Metabolic Process (GO:0000959)	3/23	0.20743	0.85637	0	0	2.036492622020431	3.203319443771725	TWNK;MRPL12;TBRG4
Negative Regulation of Proteolysis Involved in Protein Catabolic Process (GO:1903051)	3/23	0.20743	0.85637	0	0	2.036492622020431	3.203319443771725	HSP90AB1;RPL23;PSMF1
Regulation of Actin Polymerization or Depolymerization (GO:0008064)	3/23	0.20743	0.85637	0	0	2.036492622020431	3.203319443771725	COTL1;PFN1;GBA2
Protein-Containing Complex Organization (GO:0043933)	9/96	0.213126	0.85637	0	0	1.4061871921182265	2.1737873004051997	PPP2R1A;FASN;CSNK2B;HSF1;AXIN1;CHCHD10;MITF;ELOB;AP2M1
DNA-templated DNA Replication Maintenance of Fidelity (GO:0045005)	4/35	0.217506	0.85637	0	0	1.752199413489736	2.6730326210550235	CDK9;CENPX;POLD1;TONSL
Antimicrobial Humoral Response (GO:0019730)	4/35	0.217506	0.85637	0	0	1.752199413489736	2.6730326210550235	RPS19;FAU;GAPDH;LTF
DNA-templated Transcription Initiation (GO:0006352)	6/59	0.217508	0.85637	0	0	1.5379722353547944	2.3462092252625464	CDK9;ELOA;TAF7;ELOB;POLR2G;POLR2I
Negative Regulation of Cell Cycle (GO:0045786)	6/59	0.217508	0.85637	0	0	1.5379722353547944	2.3462092252625464	RNF167;CDT1;GMNN;RRP8;RHOB;MAD2L1
Positive Regulation of Intracellular Protein Transport (GO:0090316)	6/59	0.217508	0.85637	0	0	1.5379722353547944	2.3462092252625464	PLK3;HDAC3;TRIM28;SIRT6;OAZ1;RAN
Regulation of Viral Genome Replication (GO:0045069)	5/47	0.219292	0.85637	0	0	1.6169619155967279	2.453497088192469	STAU1;BANF1;PABPC1;PPIA;LTF
2-Oxoglutarate Metabolic Process (GO:0006103)	2/13	0.223436	0.85637	0	0	2.4675324675324677	3.697917303397351	GOT2;OGDH
Arp2/3 Complex-Mediated Actin Nucleation (GO:0034314)	2/13	0.223436	0.85637	0	0	2.4675324675324677	3.697917303397351	ARPC5L;TRIM27
Regulation of Endocytic Recycling (GO:2001135)	2/13	0.223436	0.85637	0	0	2.4675324675324677	3.697917303397351	EHD1;EIPR1
Regulation of Endopeptidase Activity (GO:0052548)	2/13	0.223436	0.85637	0	0	2.4675324675324677	3.697917303397351	SERPINE1;GAPDH
DNA-templated Transcription Termination (GO:0006353)	2/13	0.223436	0.85637	0	0	2.4675324675324677	3.697917303397351	PRMT5;SSU72
Regulation of Fibrinolysis (GO:0051917)	2/13	0.223436	0.85637	0	0	2.4675324675324677	3.697917303397351	SERPINE1;USF1
L-glutamate Import (GO:0051938)	2/13	0.223436	0.85637	0	0	2.4675324675324677	3.697917303397351	SLC25A22;SLC25A13
L-glutamate Transmembrane Transport (GO:0015813)	2/13	0.223436	0.85637	0	0	2.4675324675324677	3.697917303397351	SLC25A22;SLC25A13
Regulation of Lipid Catabolic Process (GO:0050994)	2/13	0.223436	0.85637	0	0	2.4675324675324677	3.697917303397351	APOC1;SIRT6
Regulation of Megakaryocyte Differentiation (GO:0045652)	2/13	0.223436	0.85637	0	0	2.4675324675324677	3.697917303397351	EIF6;PRMT1
Androgen Receptor Signaling Pathway (GO:0030521)	2/13	0.223436	0.85637	0	0	2.4675324675324677	3.697917303397351	DAXX;ZDHHC7
Antibacterial Humoral Response (GO:0019731)	2/13	0.223436	0.85637	0	0	2.4675324675324677	3.697917303397351	FAU;LTF
Regulation of Nuclear-Transcribed mRNA poly(A) Tail Shortening (GO:0060211)	2/13	0.223436	0.85637	0	0	2.4675324675324677	3.697917303397351	POLR2G;PABPC1
Regulation of Protein-Containing Complex Disassembly (GO:0043244)	2/13	0.223436	0.85637	0	0	2.4675324675324677	3.697917303397351	OGFOD1;GSPT1
Cellular Response to Arsenic-Containing Substance (GO:0071243)	2/13	0.223436	0.85637	0	0	2.4675324675324677	3.697917303397351	VCP;HSF1
Glucose 6-Phosphate Metabolic Process (GO:0051156)	2/13	0.223436	0.85637	0	0	2.4675324675324677	3.697917303397351	G6PC3;TKT
Intrinsic Apoptotic Signaling Pathway in Response to Oxidative Stress (GO:0008631)	2/13	0.223436	0.85637	0	0	2.4675324675324677	3.697917303397351	DAXX;GSKIP
Nuclear RNA Surveillance (GO:0071027)	2/13	0.223436	0.85637	0	0	2.4675324675324677	3.697917303397351	EXOSC5;EXOSC3
Nucleobase-Containing Small Molecule Metabolic Process (GO:0055086)	2/13	0.223436	0.85637	0	0	2.4675324675324677	3.697917303397351	AK6;NUDT5
Positive Regulation of Glycolytic Process (GO:0045821)	2/13	0.223436	0.85637	0	0	2.4675324675324677	3.697917303397351	UCHL1;MTOR
Positive Regulation of Purine Nucleotide Catabolic Process (GO:0033123)	2/13	0.223436	0.85637	0	0	2.4675324675324677	3.697917303397351	UCHL1;MTOR
Positive Regulation of Stem Cell Differentiation (GO:2000738)	2/13	0.223436	0.85637	0	0	2.4675324675324677	3.697917303397351	MTCH2;SIRT6
Protein Deacetylation (GO:0006476)	2/13	0.223436	0.85637	0	0	2.4675324675324677	3.697917303397351	HDAC3;SIRT6
Regulation of Aerobic Respiration (GO:1903715)	2/13	0.223436	0.85637	0	0	2.4675324675324677	3.697917303397351	VCP;IDE
Regulation of Double-Strand Break Repair via Homologous Recombination (GO:0010569)	7/72	0.224121	0.85637	0	0	1.4632400666608192	2.1883741430596197	RNF126;PRMT1;RUVBL2;MORF4L2;SIRT6;SENP3;WRAP53
Protein Localization to Organelle (GO:0033365)	11/123	0.224299	0.85637	0	0	1.335286777941417	1.9959556028360772	EHD1;MTCH2;SSB;LAMP1;DDX1;CCDC47;RAP1GDS1;LMNA;CALR;BICD2;RAB8A
DNA Synthesis Involved in DNA Repair (GO:0000731)	3/24	0.225848	0.85637	0	0	1.9393546294794877	2.8855537731757654	VCP;POLD1;WRNIP1
Embryonic Heart Tube Morphogenesis (GO:0003143)	3/24	0.225848	0.85637	0	0	1.9393546294794877	2.8855537731757654	MKKS;SMOX;DVL2
Synaptic Vesicle Endocytosis (GO:0048488)	3/24	0.225848	0.85637	0	0	1.9393546294794877	2.8855537731757654	CANX;AP2S1;AP2M1
Intracellular pH Reduction (GO:0051452)	3/24	0.225848	0.85637	0	0	1.9393546294794877	2.8855537731757654	ATP6V0D1;ATP6V1F;RAB7A
Lipid Droplet Organization (GO:0034389)	3/24	0.225848	0.85637	0	0	1.9393546294794877	2.8855537731757654	SQLE;LDAH;PPIA
Negative Regulation of Cytoskeleton Organization (GO:0051494)	3/24	0.225848	0.85637	0	0	1.9393546294794877	2.8855537731757654	TMSB4X;TWF2;PFN1
Negative Regulation of Protein Polymerization (GO:0032272)	3/24	0.225848	0.85637	0	0	1.9393546294794877	2.8855537731757654	TMSB4X;TWF2;PFN1
Nuclear-Transcribed mRNA Catabolic Process, Nonsense-Mediated Decay (GO:0000184)	3/24	0.225848	0.85637	0	0	1.9393546294794877	2.8855537731757654	EIF4A3;RNPS1;GSPT1
Positive Regulation of Establishment of Protein Localization (GO:1904951)	3/24	0.225848	0.85637	0	0	1.9393546294794877	2.8855537731757654	CCT6A;HRAS;WRAP53
Protein Exit From Endoplasmic Reticulum (GO:0032527)	3/24	0.225848	0.85637	0	0	1.9393546294794877	2.8855537731757654	VCP;SEC61B;HSP90B1
Positive Regulation of Programmed Cell Death (GO:0043068)	16/189	0.227387	0.85637	0	0	1.2581444287578913	1.8634388575443677	JUN;MTCH2;TNFRSF12A;UTP11;CCAR1;RHOB;SAV1;STK17A;FASN;DNAJA3;BAX;VDAC1;RNPS1;CTSD;CTNNBL1;PHLDA3
RNA Export From Nucleus (GO:0006405)	6/60	0.2288	0.85637	0	0	1.5093647177929639	2.2261723668962072	SSB;ALYREF;EIF4A3;NUP88;RAN;NOL6
Positive Regulation of Metabolic Process (GO:0009893)	9/98	0.230516	0.85637	0	0	1.3743563402889245	2.016779834015786	CCNB1;HDAC3;SCD;CNOT3;HSF1;SIRT6;GPR3;RNF41;SMARCA4
Positive Regulation of DNA-binding Transcription Factor Activity (GO:0051091)	11/124	0.23208	0.85637	0	0	1.3233585743393244	1.9329941890440738	BEX2;NPM1;HSF1;DVL2;RPS3;TRIM27;PHB2;TRIM21;PPIA;SMARCA4;LTF
Positive Regulation of Endocytosis (GO:0045807)	5/48	0.232102	0.85637	0	0	1.5792258644865995	2.306584146509465	HNRNPK;LMAN2;SERPINE1;CALR;LYAR
Regulation of Metabolic Process (GO:0019222)	4/36	0.232471	0.85637	0	0	1.6973011363636363	2.4763449120485292	EIF6;STK17A;GPR3;RNF41
Negative Regulation of Protein Localization (GO:1903828)	4/36	0.232471	0.85637	0	0	1.6973011363636363	2.4763449120485292	CDK9;VCP;SIRT6;MTOR
Mitotic Sister Chromatid Segregation (GO:0000070)	10/112	0.240056	0.85637	0	0	1.332503253017454	1.9013251360515078	CCNB1;NUDC;INCENP;CDCA5;CHMP1A;BCCIP;SKA3;KNSTRN;AURKB;RAN
Defense Response to Gram-positive Bacterium (GO:0050830)	3/25	0.244561	0.85637	0	0	1.851047363533175	2.6068122197295387	PNKD;FAU;LTF
Stress Granule Assembly (GO:0034063)	3/25	0.244561	0.85637	0	0	1.851047363533175	2.6068122197295387	OGFOD1;G3BP2;EIF2S1
Tumor Necrosis Factor-Mediated Signaling Pathway (GO:0033209)	3/25	0.244561	0.85637	0	0	1.851047363533175	2.6068122197295387	EIF5AL1;RRAGA;TMSB4X
Purine Ribonucleoside Triphosphate Metabolic Process (GO:0009205)	3/25	0.244561	0.85637	0	0	1.851047363533175	2.6068122197295387	NT5E;OLA1;RAN
Regulation of Androgen Receptor Signaling Pathway (GO:0060765)	3/25	0.244561	0.85637	0	0	1.851047363533175	2.6068122197295387	SAFB2;SAFB;SMARCA4
Heterochromatin Formation (GO:0031507)	5/49	0.245118	0.85637	0	0	1.5432050884269315	2.169772897661108	HNRNPK;LMNA;PPHLN1;LMNB2;SMARCA4
Cytosolic Transport (GO:0016482)	8/87	0.24735	0.85637	0	0	1.3758742269232993	1.922028059620935	RNF126;LAMP1;UBE2O;TRIM27;YKT6;PLEKHJ1;TBC1D10B;RAB7A
Response to Glucose (GO:0009749)	4/37	0.247677	0.85637	0	0	1.6457300275482094	2.296830616846552	EIF2B4;EIF2B2;EIF2B1;USF1
Establishment of Spindle Orientation (GO:0051294)	4/37	0.247677	0.85637	0	0	1.6457300275482094	2.296830616846552	HDAC3;BCCIP;SKA3;MAD2L1
Protein Monoubiquitination (GO:0006513)	4/37	0.247677	0.85637	0	0	1.6457300275482094	2.296830616846552	RNF10;RNF126;UBE2O;TRIM21
4-Hydroxyproline Metabolic Process (GO:0019471)	1/4	0.247826	0.85637	0	0	4.521706304265761	6.307911605278717	GOT2
ATP Synthesis Coupled Electron Transport (GO:0042773)	1/4	0.247826	0.85637	0	0	4.521706304265761	6.307911605278717	NDUFB6
IMP Metabolic Process (GO:0046040)	1/4	0.247826	0.85637	0	0	4.521706304265761	6.307911605278717	AMPD2
RIG-I Signaling Pathway (GO:0039529)	1/4	0.247826	0.85637	0	0	4.521706304265761	6.307911605278717	PHB2
Regulation of Leukocyte Proliferation (GO:0070663)	1/4	0.247826	0.85637	0	0	4.521706304265761	6.307911605278717	GSTP1
Regulation of Macrophage Migration (GO:1905521)	1/4	0.247826	0.85637	0	0	4.521706304265761	6.307911605278717	RTN4
Regulation of Mammary Gland Epithelial Cell Proliferation (GO:0033599)	1/4	0.247826	0.85637	0	0	4.521706304265761	6.307911605278717	RTN4
Alcohol Catabolic Process (GO:0046164)	1/4	0.247826	0.85637	0	0	4.521706304265761	6.307911605278717	SNX17
Aldehyde Biosynthetic Process (GO:0046184)	1/4	0.247826	0.85637	0	0	4.521706304265761	6.307911605278717	TKT
Antigen Processing and Presentation of Endogenous Peptide Antigen via MHC Class I (GO:0019885)	1/4	0.247826	0.85637	0	0	4.521706304265761	6.307911605278717	IDE
Arginine Catabolic Process (GO:0006527)	1/4	0.247826	0.85637	0	0	4.521706304265761	6.307911605278717	OAT
Regulation of Phospholipid Transport (GO:2001138)	1/4	0.247826	0.85637	0	0	4.521706304265761	6.307911605278717	TRIAP1
Bradykinin Catabolic Process (GO:0010815)	1/4	0.247826	0.85637	0	0	4.521706304265761	6.307911605278717	IDE
Regulation of Response to Nutrient Levels (GO:0032107)	1/4	0.247826	0.85637	0	0	4.521706304265761	6.307911605278717	PRKAG2
Regulation of Transforming Growth Factor Beta1 Production (GO:0032908)	1/4	0.247826	0.85637	0	0	4.521706304265761	6.307911605278717	LAPTM4B
Cellular Response to Iron Ion (GO:0071281)	1/4	0.247826	0.85637	0	0	4.521706304265761	6.307911605278717	SLC25A39
Response to Increased Oxygen Levels (GO:0036296)	1/4	0.247826	0.85637	0	0	4.521706304265761	6.307911605278717	ATP6V0D1
Cobalamin Transport (GO:0015889)	1/4	0.247826	0.85637	0	0	4.521706304265761	6.307911605278717	CD320
Small Molecule Biosynthetic Process (GO:0044283)	1/4	0.247826	0.85637	0	0	4.521706304265761	6.307911605278717	SIRT6
Sulfur Amino Acid Catabolic Process (GO:0000098)	1/4	0.247826	0.85637	0	0	4.521706304265761	6.307911605278717	MTRR
Synaptonemal Complex Assembly (GO:0007130)	1/4	0.247826	0.85637	0	0	4.521706304265761	6.307911605278717	TRIP13
Synaptonemal Complex Organization (GO:0070193)	1/4	0.247826	0.85637	0	0	4.521706304265761	6.307911605278717	TRIP13
tRNA Transport (GO:0051031)	1/4	0.247826	0.85637	0	0	4.521706304265761	6.307911605278717	SSB
Epoxygenase P450 Pathway (GO:0019373)	1/4	0.247826	0.85637	0	0	4.521706304265761	6.307911605278717	CYP2B6
Erythrose 4-Phosphate/Phosphoenolpyruvate Family Amino Acid Catabolic Process (GO:1902222)	1/4	0.247826	0.85637	0	0	4.521706304265761	6.307911605278717	FAH
Thiamine-Containing Compound Metabolic Process (GO:0042723)	1/4	0.247826	0.85637	0	0	4.521706304265761	6.307911605278717	SLC25A19
Toll-Like Receptor 2 Signaling Pathway (GO:0034134)	1/4	0.247826	0.85637	0	0	4.521706304265761	6.307911605278717	TNIP2
Hemoglobin Metabolic Process (GO:0020027)	1/4	0.247826	0.85637	0	0	4.521706304265761	6.307911605278717	ALAS1
Hepoxilin Biosynthetic Process (GO:0051122)	1/4	0.247826	0.85637	0	0	4.521706304265761	6.307911605278717	GSTP1
Hepoxilin Metabolic Process (GO:0051121)	1/4	0.247826	0.85637	0	0	4.521706304265761	6.307911605278717	GSTP1
Inclusion Body Assembly (GO:0070841)	1/4	0.247826	0.85637	0	0	4.521706304265761	6.307911605278717	HSP90AA1
Ketone Biosynthetic Process (GO:0042181)	1/4	0.247826	0.85637	0	0	4.521706304265761	6.307911605278717	SIRT6
Negative Regulation of Amyloid Precursor Protein Biosynthetic Process (GO:0042985)	1/4	0.247826	0.85637	0	0	4.521706304265761	6.307911605278717	ITM2C
Negative Regulation of Cholesterol Transport (GO:0032375)	1/4	0.247826	0.85637	0	0	4.521706304265761	6.307911605278717	APOC1
Negative Regulation of Glial Cell Proliferation (GO:0060253)	1/4	0.247826	0.85637	0	0	4.521706304265761	6.307911605278717	RNF10
Negative Regulation of Leukocyte Proliferation (GO:0070664)	1/4	0.247826	0.85637	0	0	4.521706304265761	6.307911605278717	GSTP1
Negative Regulation of Lipoprotein Particle Clearance (GO:0010985)	1/4	0.247826	0.85637	0	0	4.521706304265761	6.307911605278717	KHSRP
Negative Regulation of Nuclear Receptor-Mediated Glucocorticoid Signaling Pathway (GO:2000323)	1/4	0.247826	0.85637	0	0	4.521706304265761	6.307911605278717	PER1
Negative Regulation of Striated Muscle Tissue Development (GO:0045843)	1/4	0.247826	0.85637	0	0	4.521706304265761	6.307911605278717	USP19
Negative Regulation of Trophoblast Cell Migration (GO:1901164)	1/4	0.247826	0.85637	0	0	4.521706304265761	6.307911605278717	CALR
Nucleolar Large rRNA Transcription by RNA Polymerase I (GO:0042790)	1/4	0.247826	0.85637	0	0	4.521706304265761	6.307911605278717	TCOF1
Pentose-Phosphate Shunt, Non-Oxidative Branch (GO:0009052)	1/4	0.247826	0.85637	0	0	4.521706304265761	6.307911605278717	TKT
Peptidyl-Serine Dephosphorylation (GO:0070262)	1/4	0.247826	0.85637	0	0	4.521706304265761	6.307911605278717	PPP5C
Phagosome Acidification (GO:0090383)	1/4	0.247826	0.85637	0	0	4.521706304265761	6.307911605278717	RAB7A
Pituitary Gland Development (GO:0021983)	1/4	0.247826	0.85637	0	0	4.521706304265761	6.307911605278717	SOX3
Positive Regulation of Bicellular Tight Junction Assembly (GO:1903348)	1/4	0.247826	0.85637	0	0	4.521706304265761	6.307911605278717	EPHA2
Positive Regulation of Hemoglobin Biosynthetic Process (GO:0046985)	1/4	0.247826	0.85637	0	0	4.521706304265761	6.307911605278717	PRMT1
Positive Regulation of Neuroepithelial Cell Differentiation (GO:1902913)	1/4	0.247826	0.85637	0	0	4.521706304265761	6.307911605278717	SERPINE1
Positive Regulation of Odontoblast Differentiation (GO:1901331)	1/4	0.247826	0.85637	0	0	4.521706304265761	6.307911605278717	SERPINE1
Positive Regulation of Osteoblast Proliferation (GO:0033690)	1/4	0.247826	0.85637	0	0	4.521706304265761	6.307911605278717	LTF
Positive Regulation of Synapse Maturation (GO:0090129)	1/4	0.247826	0.85637	0	0	4.521706304265761	6.307911605278717	CDC20
Protein Localization to Endoplasmic Reticulum Exit Site (GO:0070973)	1/4	0.247826	0.85637	0	0	4.521706304265761	6.307911605278717	BCAP31
Purine Ribonucleoside Monophosphate Catabolic Process (GO:0009169)	1/4	0.247826	0.85637	0	0	4.521706304265761	6.307911605278717	NT5E
Pyruvate Decarboxylation to acetyl-CoA (GO:0006086)	1/4	0.247826	0.85637	0	0	4.521706304265761	6.307911605278717	PDHA1
Quaternary Ammonium Group Transport (GO:0015697)	1/4	0.247826	0.85637	0	0	4.521706304265761	6.307911605278717	SLC25A19
Regulation of MHC Class I Biosynthetic Process (GO:0045343)	1/4	0.247826	0.85637	0	0	4.521706304265761	6.307911605278717	TAF7
Regulation of T-helper Cell Differentiation (GO:0045622)	1/4	0.247826	0.85637	0	0	4.521706304265761	6.307911605278717	RNASEH2A
Regulation of acyl-CoA Biosynthetic Process (GO:0050812)	1/4	0.247826	0.85637	0	0	4.521706304265761	6.307911605278717	TPK1
Regulation of Animal Organ Morphogenesis (GO:2000027)	1/4	0.247826	0.85637	0	0	4.521706304265761	6.307911605278717	SMOX
3'-UTR-mediated mRNA Destabilization (GO:0061158)	2/14	0.249571	0.85637	0	0	2.261715797430083	3.1392909344559796	KHSRP;TARDBP
3'-UTR-mediated mRNA Stabilization (GO:0070935)	2/14	0.249571	0.85637	0	0	2.261715797430083	3.1392909344559796	TARDBP;ELAVL1
Regulation of Exosomal Secretion (GO:1903541)	2/14	0.249571	0.85637	0	0	2.261715797430083	3.1392909344559796	HGS;RAB7A
Golgi to Vacuole Transport (GO:0006896)	2/14	0.249571	0.85637	0	0	2.261715797430083	3.1392909344559796	LAMP1;AP3D1
Actin Nucleation (GO:0045010)	2/14	0.249571	0.85637	0	0	2.261715797430083	3.1392909344559796	ARPC5L;TRIM27
Cellular Response to dsRNA (GO:0071359)	2/14	0.249571	0.85637	0	0	2.261715797430083	3.1392909344559796	NPM1;PQBP1
Release of Cytochrome C From Mitochondria (GO:0001836)	2/14	0.249571	0.85637	0	0	2.261715797430083	3.1392909344559796	BAX;TIMM50
Response to ATP (GO:0033198)	2/14	0.249571	0.85637	0	0	2.261715797430083	3.1392909344559796	NT5E;HSP90B1
Glycogen Catabolic Process (GO:0005980)	2/14	0.249571	0.85637	0	0	2.261715797430083	3.1392909344559796	WDR45B;ATG2A
Maintenance of Protein Localization in Organelle (GO:0072595)	2/14	0.249571	0.85637	0	0	2.261715797430083	3.1392909344559796	HSPA5;CHCHD10
Mitotic G1/S Transition Checkpoint Signaling (GO:0044819)	2/14	0.249571	0.85637	0	0	2.261715797430083	3.1392909344559796	PLK3;TRIAP1
Mitotic Chromosome Condensation (GO:0007076)	2/14	0.249571	0.85637	0	0	2.261715797430083	3.1392909344559796	CDCA5;CHMP1A
Myeloid Cell Development (GO:0061515)	2/14	0.249571	0.85637	0	0	2.261715797430083	3.1392909344559796	ALAS1;LYAR
Negative Regulation of Transcription Elongation by RNA Polymerase II (GO:0034244)	2/14	0.249571	0.85637	0	0	2.261715797430083	3.1392909344559796	SIRT6;NELFB
Neuromuscular Junction Development (GO:0007528)	2/14	0.249571	0.85637	0	0	2.261715797430083	3.1392909344559796	DNAJA3;GPHN
Positive Regulation of Mitochondrial Fission (GO:0090141)	2/14	0.249571	0.85637	0	0	2.261715797430083	3.1392909344559796	PGAM5;MCU
Protein K6-linked Ubiquitination (GO:0085020)	2/14	0.249571	0.85637	0	0	2.261715797430083	3.1392909344559796	UBE2J2;TRIM21
Protein Localization to Endoplasmic Reticulum (GO:0070972)	2/14	0.249571	0.85637	0	0	2.261715797430083	3.1392909344559796	BCAP31;HSPA5
rRNA Catabolic Process (GO:0016075)	2/14	0.249571	0.85637	0	0	2.261715797430083	3.1392909344559796	EXOSC5;PELO
Double-Strand Break Repair (GO:0006302)	14/166	0.250822	0.85954	0	0	1.2523139745916516	1.731965115242276	VCP;XRCC6;PSMD14;CDCA5;DDX1;TONSL;SIRT6;PRPF19;SEM1;PPP5C;RAD21;UBE2V2;AUNIP;TRIP13
Regulation of DNA Replication (GO:0006275)	6/62	0.251916	0.862164	0	0	1.4552147738366417	2.0062456993403917	CCNA2;CDT1;RUVBL2;GMNN;KAT7;GTPBP4
Regulation of Cell Cycle Process (GO:0010564)	11/127	0.256023	0.869076	0	0	1.288807915629814	1.7559873460269604	PLK3;PRMT5;ZWILCH;MYC;RPL23;ENTR1;KNSTRN;RRP8;AURKB;USP19;SMARCA4
Negative Regulation of Response to External Stimulus (GO:0032102)	9/101	0.257522	0.869076	0	0	1.3292049689440995	1.8032673188771098	TNFAIP6;TMSB4X;SERPINE1;BANF1;DTX4;TRIM21;LYAR;AURKB;LTF
Nucleotide-Excision Repair (GO:0006289)	5/50	0.258318	0.869076	0	0	1.5087852357476932	2.0422357614566296	XAB2;USP7;NTHL1;POLD1;POLR2I
SCF-dependent Proteasomal Ubiquitin-Dependent Protein Catabolic Process (GO:0031146)	4/38	0.263089	0.869076	0	0	1.597192513368984	2.1326701359455087	FBXW5;CCNF;CUL2;FBXL6
Regulation of Protein Import Into Nucleus (GO:0042306)	4/38	0.263089	0.869076	0	0	1.597192513368984	2.1326701359455087	HDAC3;TRIM28;SIRT6;RAN
Regulation of Double-Strand Break Repair via Nonhomologous End Joining (GO:2001032)	3/26	0.263506	0.869076	0	0	1.7704189902778462	2.3611720155952436	HSF1;AUNIP;WRAP53
Apoptotic Mitochondrial Changes (GO:0008637)	3/26	0.263506	0.869076	0	0	1.7704189902778462	2.3611720155952436	BAX;HSPD1;TIMM50
miRNA-mediated Post-Transcriptional Gene Silencing (GO:0035195)	3/26	0.263506	0.869076	0	0	1.7704189902778462	2.3611720155952436	EIF6;RAN;EIF4G1
Negative Regulation of Intracellular Steroid Hormone Receptor Signaling Pathway (GO:0033144)	3/26	0.263506	0.869076	0	0	1.7704189902778462	2.3611720155952436	PER1;CALR;SMARCA4
Positive Regulation of Protein Import Into Nucleus (GO:0042307)	3/26	0.263506	0.869076	0	0	1.7704189902778462	2.3611720155952436	HDAC3;TRIM28;RAN
Regulation of Innate Immune Response (GO:0045088)	6/63	0.263711	0.869076	0	0	1.429564800383647	1.9054716063442563	CDC37;BANF1;DTX4;TRIM21;LYAR;AURKB
Positive Regulation of Double-Strand Break Repair (GO:2000781)	8/89	0.267038	0.869076	0	0	1.341676531935284	1.7715012268040957	RNF126;PRMT1;RUVBL2;MORF4L2;UBE2V2;SIRT6;SMARCA4;WRAP53
B Cell Activation (GO:0042113)	5/51	0.271683	0.869076	0	0	1.4758618984023346	1.9232263495936452	KLF6;AKAP17A;SLC25A5;PHB2;HSPD1
Positive Regulation of DNA Recombination (GO:0045911)	5/51	0.271683	0.869076	0	0	1.4758618984023346	1.9232263495936452	RNF126;PRMT1;RUVBL2;MORF4L2;WRAP53
Autophagy of Peroxisome (GO:0030242)	2/15	0.275784	0.869076	0	0	2.0875632304203733	2.689068364356981	WDR45B;ATG2A
Cellular Response to Misfolded Protein (GO:0071218)	2/15	0.275784	0.869076	0	0	2.0875632304203733	2.689068364356981	VCP;RNF126
Electron Transport Chain (GO:0022900)	2/15	0.275784	0.869076	0	0	2.0875632304203733	2.689068364356981	UQCRFS1;SDHB
Establishment of Melanosome Localization (GO:0032401)	2/15	0.275784	0.869076	0	0	2.0875632304203733	2.689068364356981	MKKS;SHROOM2
Lysosomal Lumen Acidification (GO:0007042)	2/15	0.275784	0.869076	0	0	2.0875632304203733	2.689068364356981	LAMP1;ATP6V1F
Negative Regulation of Calcium Ion Transmembrane Transport (GO:1903170)	2/15	0.275784	0.869076	0	0	2.0875632304203733	2.689068364356981	TMBIM6;VDAC1
Negative Regulation of Fibroblast Proliferation (GO:0048147)	2/15	0.275784	0.869076	0	0	2.0875632304203733	2.689068364356981	GSTP1;MYC
Negative Regulation of Intracellular Protein Transport (GO:0090317)	2/15	0.275784	0.869076	0	0	2.0875632304203733	2.689068364356981	SIRT6;RANGAP1
Neutrophil Chemotaxis (GO:0030593)	2/15	0.275784	0.869076	0	0	2.0875632304203733	2.689068364356981	PPIB;PPIA
Nuclear-Transcribed mRNA poly(A) Tail Shortening (GO:0000289)	2/15	0.275784	0.869076	0	0	2.0875632304203733	2.689068364356981	CNOT11;CNOT3
Pexophagy (GO:0000425)	2/15	0.275784	0.869076	0	0	2.0875632304203733	2.689068364356981	WDR45B;ATG2A
Positive Regulation of Interleukin-2 Production (GO:0032743)	2/15	0.275784	0.869076	0	0	2.0875632304203733	2.689068364356981	STOML2;RPS3
Positive Regulation of Nitric Oxide Biosynthetic Process (GO:0045429)	2/15	0.275784	0.869076	0	0	2.0875632304203733	2.689068364356981	HSP90AA1;HSP90AB1
Positive Regulation of Nitric Oxide Metabolic Process (GO:1904407)	2/15	0.275784	0.869076	0	0	2.0875632304203733	2.689068364356981	HSP90AA1;HSP90AB1
Positive Regulation of Stem Cell Proliferation (GO:2000648)	2/15	0.275784	0.869076	0	0	2.0875632304203733	2.689068364356981	EPCAM;KAT7
Positive Regulation of Ubiquitin-Protein Transferase Activity (GO:0051443)	2/15	0.275784	0.869076	0	0	2.0875632304203733	2.689068364356981	CDC20;RPS2
Protein O-linked Mannosylation (GO:0035269)	2/15	0.275784	0.869076	0	0	2.0875632304203733	2.689068364356981	DPM1;DPM2
Regulation of Centriole Replication (GO:0046599)	2/15	0.275784	0.869076	0	0	2.0875632304203733	2.689068364356981	NPM1;PLK2
Regulation of Osteoclast Differentiation (GO:0045670)	3/27	0.282621	0.869076	0	0	1.6965096481271282	2.143791509177551	TNFAIP6;TCTA;MTOR
Constitutive Heterochromatin Formation (GO:0140719)	3/27	0.282621	0.869076	0	0	1.6965096481271282	2.143791509177551	TRIM28;SIRT6;PPHLN1
mRNA 3'-End Processing (GO:0031124)	3/27	0.282621	0.869076	0	0	1.6965096481271282	2.143791509177551	CSTF3;PAPOLA;SSU72
Positive Regulation of Lymphocyte Activation (GO:0051251)	3/27	0.282621	0.869076	0	0	1.6965096481271282	2.143791509177551	XRCC6;TNIP2;HSPD1
G2/M Transition of Mitotic Cell Cycle (GO:0000086)	4/40	0.294401	0.869076	0	0	1.5082070707070707	1.8442566578221176	CCNA2;PLK3;CCNB1;ENSA
Response to Amino Acid Starvation (GO:1990928)	4/40	0.294401	0.869076	0	0	1.5082070707070707	1.8442566578221176	RRAGA;FASN;EIF2S1;MTOR
Response to Peptide Hormone (GO:0043434)	4/40	0.294401	0.869076	0	0	1.5082070707070707	1.8442566578221176	EIF2B4;EIF2B2;EIF6;EIF2B1
Transcription Initiation-Coupled Chromatin Remodeling (GO:0045815)	4/40	0.294401	0.869076	0	0	1.5082070707070707	1.8442566578221176	WDR5;KAT7;NOC2L;SMARCA4
Fatty Acid Biosynthetic Process (GO:0006633)	4/40	0.294401	0.869076	0	0	1.5082070707070707	1.8442566578221176	GSTM4;SCD;FASN;MCAT
Negative Regulation of Autophagy (GO:0010507)	5/53	0.298818	0.869076	0	0	1.4141306408797876	1.7081561360459707	RRAGA;SNRNP70;TRIM27;MTOR;EIF4G1
Positive Regulation of Telomere Maintenance (GO:0032206)	5/53	0.298818	0.869076	0	0	1.4141306408797876	1.7081561360459707	MYC;RUVBL2;SIRT6;AURKB;GNL3
Negative Regulation of Defense Response (GO:0031348)	7/79	0.299126	0.869076	0	0	1.3202046116812365	1.5933405282252273	TNFAIP6;TMSB4X;BANF1;DTX4;TRIM21;LYAR;AURKB
Regulation of Complement Activation (GO:0030449)	1/5	0.299526	0.869076	0	0	3.3909966024915064	4.0880250610987865	PHB2
C21-steroid Hormone Metabolic Process (GO:0008207)	1/5	0.299526	0.869076	0	0	3.3909966024915064	4.0880250610987865	HSD17B10
COPI Coating of Golgi Vesicle (GO:0048205)	1/5	0.299526	0.869076	0	0	3.3909966024915064	4.0880250610987865	TMED2
COPI-coated Vesicle Budding (GO:0035964)	1/5	0.299526	0.869076	0	0	3.3909966024915064	4.0880250610987865	TMED2
GMP Biosynthetic Process (GO:0006177)	1/5	0.299526	0.869076	0	0	3.3909966024915064	4.0880250610987865	ATIC
Golgi Disassembly (GO:0090166)	1/5	0.299526	0.869076	0	0	3.3909966024915064	4.0880250610987865	PLK3
Golgi Transport Vesicle Coating (GO:0048200)	1/5	0.299526	0.869076	0	0	3.3909966024915064	4.0880250610987865	TMED2
Regulation of Heart Morphogenesis (GO:2000826)	1/5	0.299526	0.869076	0	0	3.3909966024915064	4.0880250610987865	SMOX
Regulation of Hematopoietic Stem Cell Proliferation (GO:1902033)	1/5	0.299526	0.869076	0	0	3.3909966024915064	4.0880250610987865	KAT7
Regulation of Hemoglobin Biosynthetic Process (GO:0046984)	1/5	0.299526	0.869076	0	0	3.3909966024915064	4.0880250610987865	PRMT1
Regulation of Microvillus Organization (GO:0032530)	1/5	0.299526	0.869076	0	0	3.3909966024915064	4.0880250610987865	TWF2
Adiponectin-Activated Signaling Pathway (GO:0033211)	1/5	0.299526	0.869076	0	0	3.3909966024915064	4.0880250610987865	CSNK2B
Regulation of Neuromuscular Junction Development (GO:1904396)	1/5	0.299526	0.869076	0	0	3.3909966024915064	4.0880250610987865	PDZD11
Regulation of Nitric Oxide Metabolic Process (GO:0080164)	1/5	0.299526	0.869076	0	0	3.3909966024915064	4.0880250610987865	NOSIP
Regulation of Nuclear Receptor-Mediated Glucocorticoid Signaling Pathway (GO:2000322)	1/5	0.299526	0.869076	0	0	3.3909966024915064	4.0880250610987865	PER1
Regulation of Pentose-Phosphate Shunt (GO:0043456)	1/5	0.299526	0.869076	0	0	3.3909966024915064	4.0880250610987865	MTOR
Attachment of GPI Anchor to Protein (GO:0016255)	1/5	0.299526	0.869076	0	0	3.3909966024915064	4.0880250610987865	PIGT
Auditory Receptor Cell Stereocilium Organization (GO:0060088)	1/5	0.299526	0.869076	0	0	3.3909966024915064	4.0880250610987865	TPRN
Cap-Dependent Translational Initiation (GO:0002191)	1/5	0.299526	0.869076	0	0	3.3909966024915064	4.0880250610987865	EIF4G1
Regulation of Response to Stress (GO:0080134)	1/5	0.299526	0.869076	0	0	3.3909966024915064	4.0880250610987865	EIF4G1
Regulation of Stress Granule Assembly (GO:0062028)	1/5	0.299526	0.869076	0	0	3.3909966024915064	4.0880250610987865	G3BP2
Cell Fate Commitment Involved in Formation of Primary Germ Layer (GO:0060795)	1/5	0.299526	0.869076	0	0	3.3909966024915064	4.0880250610987865	CTR9
Regulation of Synaptic Assembly at Neuromuscular Junction (GO:0008582)	1/5	0.299526	0.869076	0	0	3.3909966024915064	4.0880250610987865	PDZD11
Cytolysis by Host of Symbiont Cells (GO:0051838)	1/5	0.299526	0.869076	0	0	3.3909966024915064	4.0880250610987865	LTF
Ribosome-Associated Ubiquitin-Dependent Protein Catabolic Process (GO:1990116)	1/5	0.299526	0.869076	0	0	3.3909966024915064	4.0880250610987865	RNF10
Detection of Visible Light (GO:0009584)	1/5	0.299526	0.869076	0	0	3.3909966024915064	4.0880250610987865	GNA11
snRNA Modification (GO:0040031)	1/5	0.299526	0.869076	0	0	3.3909966024915064	4.0880250610987865	NOP10
Spindle Assembly Involved in Female Meiosis (GO:0007056)	1/5	0.299526	0.869076	0	0	3.3909966024915064	4.0880250610987865	SKA3
Sulfur Amino Acid Biosynthetic Process (GO:0000097)	1/5	0.299526	0.869076	0	0	3.3909966024915064	4.0880250610987865	MTRR
Endoplasmic Reticulum Tubular Network Formation (GO:0071787)	1/5	0.299526	0.869076	0	0	3.3909966024915064	4.0880250610987865	RTN4
Synaptic Vesicle Fusion to Presynaptic Active Zone Membrane (GO:0031629)	1/5	0.299526	0.869076	0	0	3.3909966024915064	4.0880250610987865	SNAP47
Toll-Like Receptor 9 Signaling Pathway (GO:0034162)	1/5	0.299526	0.869076	0	0	3.3909966024915064	4.0880250610987865	TNIP2
Fibrinolysis (GO:0042730)	1/5	0.299526	0.869076	0	0	3.3909966024915064	4.0880250610987865	SERPINE1
Vitamin K Metabolic Process (GO:0042373)	1/5	0.299526	0.869076	0	0	3.3909966024915064	4.0880250610987865	NQO1
Glucose Mediated Signaling Pathway (GO:0010255)	1/5	0.299526	0.869076	0	0	3.3909966024915064	4.0880250610987865	USF1
Hexose Mediated Signaling (GO:0009757)	1/5	0.299526	0.869076	0	0	3.3909966024915064	4.0880250610987865	USF1
Homocysteine Metabolic Process (GO:0050667)	1/5	0.299526	0.869076	0	0	3.3909966024915064	4.0880250610987865	MTRR
Hormone Catabolic Process (GO:0042447)	1/5	0.299526	0.869076	0	0	3.3909966024915064	4.0880250610987865	IDE
Internal Peptidyl-Lysine Acetylation (GO:0018393)	1/5	0.299526	0.869076	0	0	3.3909966024915064	4.0880250610987865	KAT7
Intracellular mRNA Localization (GO:0008298)	1/5	0.299526	0.869076	0	0	3.3909966024915064	4.0880250610987865	STAU1
Ketone Body Metabolic Process (GO:1902224)	1/5	0.299526	0.869076	0	0	3.3909966024915064	4.0880250610987865	OXCT1
Lens Fiber Cell Development (GO:0070307)	1/5	0.299526	0.869076	0	0	3.3909966024915064	4.0880250610987865	EPHA2
Long-Term Synaptic Depression (GO:0060292)	1/5	0.299526	0.869076	0	0	3.3909966024915064	4.0880250610987865	PLK2
mRNA 5'-Splice Site Recognition (GO:0000395)	1/5	0.299526	0.869076	0	0	3.3909966024915064	4.0880250610987865	SNRPC
Melanocyte Differentiation (GO:0030318)	1/5	0.299526	0.869076	0	0	3.3909966024915064	4.0880250610987865	MITF
Metaphase/Anaphase Transition of Mitotic Cell Cycle (GO:0007091)	1/5	0.299526	0.869076	0	0	3.3909966024915064	4.0880250610987865	TACC3
Mitochondrial Fragmentation Involved in Apoptotic Process (GO:0043653)	1/5	0.299526	0.869076	0	0	3.3909966024915064	4.0880250610987865	BAX
Negative Regulation of Hemostasis (GO:1900047)	1/5	0.299526	0.869076	0	0	3.3909966024915064	4.0880250610987865	SERPINE1
Negative Regulation of Mitochondrial Membrane Potential (GO:0010917)	1/5	0.299526	0.869076	0	0	3.3909966024915064	4.0880250610987865	BAX
Negative Regulation of Muscle Hypertrophy (GO:0014741)	1/5	0.299526	0.869076	0	0	3.3909966024915064	4.0880250610987865	GLRX3
Negative Regulation of Peptidyl-Threonine Phosphorylation (GO:0010801)	1/5	0.299526	0.869076	0	0	3.3909966024915064	4.0880250610987865	EIF4G1
Negative Regulation of Protein Polyubiquitination (GO:1902915)	1/5	0.299526	0.869076	0	0	3.3909966024915064	4.0880250610987865	PPIA
Negative Regulation of Transforming Growth Factor Beta Production (GO:0071635)	1/5	0.299526	0.869076	0	0	3.3909966024915064	4.0880250610987865	LAPTM4B
Neuronal Action Potential (GO:0019228)	1/5	0.299526	0.869076	0	0	3.3909966024915064	4.0880250610987865	MYH14
Neurotransmitter Receptor Transport to Postsynaptic Membrane (GO:0098969)	1/5	0.299526	0.869076	0	0	3.3909966024915064	4.0880250610987865	RAB8A
Neurotransmitter-Gated Ion Channel Clustering (GO:0072578)	1/5	0.299526	0.869076	0	0	3.3909966024915064	4.0880250610987865	GPHN
Nucleic Acid Biosynthetic Process (GO:0141187)	1/5	0.299526	0.869076	0	0	3.3909966024915064	4.0880250610987865	POLD2
Nucleotide Catabolic Process (GO:0009166)	1/5	0.299526	0.869076	0	0	3.3909966024915064	4.0880250610987865	VCP
Nucleotide Transport (GO:0006862)	1/5	0.299526	0.869076	0	0	3.3909966024915064	4.0880250610987865	SLC25A19
Nucleotide-Excision Repair, DNA Gap Filling (GO:0006297)	1/5	0.299526	0.869076	0	0	3.3909966024915064	4.0880250610987865	POLD1
Outer Dynein Arm Assembly (GO:0036158)	1/5	0.299526	0.869076	0	0	3.3909966024915064	4.0880250610987865	DNAAF5
Polyamine Biosynthetic Process (GO:0006596)	1/5	0.299526	0.869076	0	0	3.3909966024915064	4.0880250610987865	SMOX
Positive Regulation of Calcium Ion Transport Into Cytosol (GO:0010524)	1/5	0.299526	0.869076	0	0	3.3909966024915064	4.0880250610987865	P2RX5
Positive Regulation of Centriole Elongation (GO:1903724)	1/5	0.299526	0.869076	0	0	3.3909966024915064	4.0880250610987865	PPP1R35
Positive Regulation of Fibroblast Apoptotic Process (GO:2000271)	1/5	0.299526	0.869076	0	0	3.3909966024915064	4.0880250610987865	STK17A
Positive Regulation of Kidney Development (GO:0090184)	1/5	0.299526	0.869076	0	0	3.3909966024915064	4.0880250610987865	MYC
Positive Regulation of Leukocyte Differentiation (GO:1902107)	1/5	0.299526	0.869076	0	0	3.3909966024915064	4.0880250610987865	XRCC6
Positive Regulation of Mitotic Sister Chromatid Segregation (GO:0062033)	1/5	0.299526	0.869076	0	0	3.3909966024915064	4.0880250610987865	SKA3
Positive Regulation of Myoblast Fusion (GO:1901741)	1/5	0.299526	0.869076	0	0	3.3909966024915064	4.0880250610987865	EHD1
Positive Regulation of Protein K63-linked Ubiquitination (GO:1902523)	1/5	0.299526	0.869076	0	0	3.3909966024915064	4.0880250610987865	UBE2V2
Positive Regulation of Protein Localization to Centrosome (GO:1904781)	1/5	0.299526	0.869076	0	0	3.3909966024915064	4.0880250610987865	PARD6A
Positive Regulation of Protein Localization to Cilium (GO:1903566)	1/5	0.299526	0.869076	0	0	3.3909966024915064	4.0880250610987865	ENTR1
Positive Regulation of Store-Operated Calcium Channel Activity (GO:1901341)	1/5	0.299526	0.869076	0	0	3.3909966024915064	4.0880250610987865	CASQ1
Positive Regulation of Tumor Necrosis Factor-Mediated Signaling Pathway (GO:1903265)	1/5	0.299526	0.869076	0	0	3.3909966024915064	4.0880250610987865	CPNE1
Positive Regulation of Type 2 Mitophagy (GO:1905091)	1/5	0.299526	0.869076	0	0	3.3909966024915064	4.0880250610987865	VDAC1
Positive Regulation of Vascular Associated Smooth Muscle Cell Migration (GO:1904754)	1/5	0.299526	0.869076	0	0	3.3909966024915064	4.0880250610987865	DOCK4
Protein Histidyl Modification to Diphthamide (GO:0017183)	1/5	0.299526	0.869076	0	0	3.3909966024915064	4.0880250610987865	DPH3
Purine Nucleobase Transport (GO:0006863)	1/5	0.299526	0.869076	0	0	3.3909966024915064	4.0880250610987865	VDAC3
Regulation of acetyl-CoA Biosynthetic Process From Pyruvate (GO:0010510)	1/5	0.299526	0.869076	0	0	3.3909966024915064	4.0880250610987865	TPK1
Regulation of Basement Membrane Organization (GO:0110011)	1/5	0.299526	0.869076	0	0	3.3909966024915064	4.0880250610987865	LMNB2
Regulation of Blood Vessel Branching (GO:1905553)	1/5	0.299526	0.869076	0	0	3.3909966024915064	4.0880250610987865	SIRT6
Regulation of Calcium Import Into the Mitochondrion (GO:0110097)	1/5	0.299526	0.869076	0	0	3.3909966024915064	4.0880250610987865	VDAC1
Regulation of Cellular Response to Hypoxia (GO:1900037)	1/5	0.299526	0.869076	0	0	3.3909966024915064	4.0880250610987865	USP19
DNA Damage Response, Signal Transduction by P53 Class Mediator (GO:0030330)	3/28	0.301849	0.869076	0	0	1.6285130533484677	1.9506802571573143	TRIAP1;RPL26;GTSE1
Regulation of Gluconeogenesis (GO:0006111)	3/28	0.301849	0.869076	0	0	1.6285130533484677	1.9506802571573143	USP7;PRKAG2;SIRT6
Regulation of Peptide Hormone Secretion (GO:0090276)	3/28	0.301849	0.869076	0	0	1.6285130533484677	1.9506802571573143	EIPR1;ENSA;SLC25A22
Negative Regulation of Secretion by Cell (GO:1903531)	3/28	0.301849	0.869076	0	0	1.6285130533484677	1.9506802571573143	PNKD;DPH3;ERP29
Positive Regulation of Phagocytosis (GO:0050766)	3/28	0.301849	0.869076	0	0	1.6285130533484677	1.9506802571573143	LMAN2;CALR;LYAR
Regulation of Generation of Precursor Metabolites and Energy (GO:0043467)	2/16	0.301942	0.869076	0	0	1.9382896015549076	2.321142118464577	EIF6;PRKAG2
Regulation of Lipid Biosynthetic Process (GO:0046890)	2/16	0.301942	0.869076	0	0	1.9382896015549076	2.321142118464577	EIF6;MTOR
Attachment of Mitotic Spindle Microtubules to Kinetochore (GO:0051315)	2/16	0.301942	0.869076	0	0	1.9382896015549076	2.321142118464577	CDT1;SKA3
Regulation of Viral Transcription (GO:0046782)	2/16	0.301942	0.869076	0	0	1.9382896015549076	2.321142118464577	TRIM27;TRIM21
Maintenance of Protein Location in Nucleus (GO:0051457)	2/16	0.301942	0.869076	0	0	1.9382896015549076	2.321142118464577	CHCHD10;RANGAP1
Membrane Depolarization (GO:0051899)	2/16	0.301942	0.869076	0	0	1.9382896015549076	2.321142118464577	ATP5IF1;YWHAH
Mitochondrial Calcium Ion Transmembrane Transport (GO:0006851)	2/16	0.301942	0.869076	0	0	1.9382896015549076	2.321142118464577	VDAC1;MCU
Negative Regulation of Endothelial Cell Apoptotic Process (GO:2000352)	2/16	0.301942	0.869076	0	0	1.9382896015549076	2.321142118464577	TNIP2;SERPINE1
Negative Regulation of Extrinsic Apoptotic Signaling Pathway via Death Domain Receptors (GO:1902042)	2/16	0.301942	0.869076	0	0	1.9382896015549076	2.321142118464577	SERPINE1;PEA15
Negative Regulation of Neuron Differentiation (GO:0045665)	2/16	0.301942	0.869076	0	0	1.9382896015549076	2.321142118464577	SOX3;CALR
Peptidyl-Lysine Methylation (GO:0018022)	2/16	0.301942	0.869076	0	0	1.9382896015549076	2.321142118464577	SETD3;CSKMT
Positive Regulation of Blood Coagulation (GO:0030194)	2/16	0.301942	0.869076	0	0	1.9382896015549076	2.321142118464577	SERPINE1;USF1
Protein Mannosylation (GO:0035268)	2/16	0.301942	0.869076	0	0	1.9382896015549076	2.321142118464577	DPM1;DPM2
Protein Complex Oligomerization (GO:0051259)	8/93	0.307647	0.873886	0	0	1.278109051839914	1.5066388623092326	EHD1;STOML2;EHD4;PRMT1;TWNK;G3BP2;ELAVL1;MCU
Translational Elongation (GO:0006414)	4/41	0.310235	0.873886	0	0	1.4673218673218673	1.7173908876350286	EIF5AL1;PELO;MRPL44;TUFM
Positive Regulation of Nucleocytoplasmic Transport (GO:0046824)	4/41	0.310235	0.873886	0	0	1.4673218673218673	1.7173908876350286	HDAC3;TRIM28;SIRT6;RAN
Regulation of Double-Strand Break Repair (GO:2000779)	7/80	0.310281	0.873886	0	0	1.3020102778775715	1.52371189104255	RUVBL2;MORF4L2;UBE2V2;SIRT6;OTUB1;SMARCA4;WRAP53
Regulation of Cellular Localization (GO:0060341)	5/54	0.312548	0.873886	0	0	1.3851547444916532	1.6109302269974548	RSL1D1;HSP90AA1;HSP90AB1;PARD6A;DNAJB6
Regulation of Mitotic Cell Cycle (GO:0007346)	9/107	0.314198	0.873886	0	0	1.247195335276968	1.4439180775889646	CDC20;CDK9;PRMT5;CCNB1;MAEA;ANAPC7;GMNN;HSF1;MAD2L1
Protein Transport (GO:0015031)	20/258	0.319893	0.873886	0	0	1.1421374105197635	1.3017738812686692	NPM1;RAB1B;AP3D1;TIMM21;SCAMP3;PDIA4;HSP90B1;TIMM50;EHD1;SEC23IP;SCFD2;SNX17;CHMP1A;CANX;ERP29;TIMM17A;TMED2;PREB;RAB7A;YWHAH
Establishment of Mitotic Spindle Orientation (GO:0000132)	3/29	0.321134	0.873886	0	0	1.5657469658604732	1.7785245808068446	HDAC3;BCCIP;MAD2L1
Ub-dep Prot Cat Proc via Multivsiclr Bdy Sorting Pway (GO:0043162)	3/29	0.321134	0.873886	0	0	1.5657469658604732	1.7785245808068446	RNF126;HGS;PTPN23
Negative Regulation of Type I Interferon Production (GO:0032480)	3/29	0.321134	0.873886	0	0	1.5657469658604732	1.7785245808068446	DDX56;BANF1;TRIM27
Regulation of Protein Localization (GO:0032880)	7/81	0.321513	0.873886	0	0	1.2843076828253568	1.457325446437123	RSL1D1;VCP;HSP90AA1;HSP90AB1;DNAJB6;ZDHHC7;CTSD
Positive Regulation of Endothelial Cell Migration (GO:0010595)	6/68	0.324462	0.873886	0	0	1.313726210595929	1.4787126323171882	ATP5F1A;ATP5F1B;TMSB4X;EMC10;CALR;RHOB
Intracellular Iron Ion Homeostasis (GO:0006879)	4/42	0.326147	0.873886	0	0	1.4285885167464114	1.6006007342418227	GLRX3;MYC;ATP6V0D1;NUBP2
Organelle Disassembly (GO:1903008)	4/42	0.326147	0.873886	0	0	1.4285885167464114	1.6006007342418227	PLK3;VCP;PELO;TRIM21
Regulation of Insulin Secretion (GO:0050796)	5/55	0.326359	0.873886	0	0	1.3573378839590444	1.5198885906384039	EIPR1;ENSA;SIRT6;SLC25A22;MCU
Autophagy of Mitochondrion (GO:0000422)	5/55	0.326359	0.873886	0	0	1.3573378839590444	1.5198885906384039	WDR45B;ATG2A;AMBRA1;PHB2;EIF2S1
Vesicle Organization (GO:0016050)	5/55	0.326359	0.873886	0	0	1.3573378839590444	1.5198885906384039	LAPTM4B;TRAPPC2L;TRAPPC4;LAMTOR1;PLEKHJ1
DNA Modification (GO:0006304)	2/17	0.327928	0.873886	0	0	1.8089191232048374	2.0168727981889716	EXOSC5;NTHL1
Regulation of Meiotic Cell Cycle (GO:0051445)	2/17	0.327928	0.873886	0	0	1.8089191232048374	2.0168727981889716	CDC20;ANAPC7
Cellular Response to Nerve Growth Factor Stimulus (GO:1990090)	2/17	0.327928	0.873886	0	0	1.8089191232048374	2.0168727981889716	EHD1;RAPGEF1
Endosome Transport via Multivesicular Body Sorting Pathway (GO:0032509)	2/17	0.327928	0.873886	0	0	1.8089191232048374	2.0168727981889716	LAPTM4B;VCP
Melanosome Localization (GO:0032400)	2/17	0.327928	0.873886	0	0	1.8089191232048374	2.0168727981889716	MKKS;SHROOM2
miRNA-mediated Gene Silencing by Inhibition of Translation (GO:0035278)	2/17	0.327928	0.873886	0	0	1.8089191232048374	2.0168727981889716	EIF6;EIF4G1
Mitochondrial Calcium Ion Homeostasis (GO:0051560)	2/17	0.327928	0.873886	0	0	1.8089191232048374	2.0168727981889716	RAP1GDS1;MCU
Negative Regulation of DNA-templated Transcription, Elongation (GO:0032785)	2/17	0.327928	0.873886	0	0	1.8089191232048374	2.0168727981889716	SIRT6;NELFB
Negative Regulation of Nucleocytoplasmic Transport (GO:0046823)	2/17	0.327928	0.873886	0	0	1.8089191232048374	2.0168727981889716	SIRT6;RANGAP1
Positive Regulation of Cell Cycle Phase Transition (GO:1901989)	2/17	0.327928	0.873886	0	0	1.8089191232048374	2.0168727981889716	NPM1;PHB2
Positive Regulation of mRNA Splicing, via Spliceosome (GO:0048026)	2/17	0.327928	0.873886	0	0	1.8089191232048374	2.0168727981889716	PRMT5;WDR77
Positive Regulation of Neutrophil Migration (GO:1902624)	2/17	0.327928	0.873886	0	0	1.8089191232048374	2.0168727981889716	RTN4;MCU
Positive Regulation of Gene Expression (GO:0010628)	22/288	0.333632	0.873886	0	0	1.124025260366694	1.2338615286200327	NPM1;SSB;SMOX;PRMT1;RPL23;EIF4A3;NAT10;MITF;AGPAT1;ELAVL1;MTOR;ACTG1;EIF6;HGS;ALKBH1;MYC;RPS3;ERP29;RPL26;GAPDH;EIF3D;LAMTOR5
Positive Regulation of Protein Modification by Small Protein Conjugation or Removal (GO:1903322)	6/69	0.336866	0.873886	0	0	1.2927649419676754	1.4066170109043692	HDAC3;CENPX;DNAJA3;AXIN1;HSPBP1;GNL3
Ras Protein Signal Transduction (GO:0007265)	5/56	0.340231	0.873886	0	0	1.330611880702224	1.4345725131044529	CCNA2;PLK2;RAPGEF1;G3BP2;HRAS
Post-Transcriptional Regulation of Gene Expression (GO:0010608)	5/56	0.340231	0.873886	0	0	1.330611880702224	1.4345725131044529	EIF2B4;PER1;TCOF1;NAT10;NOLC1
Regulation of Actin Filament Polymerization (GO:0030833)	5/56	0.340231	0.873886	0	0	1.330611880702224	1.4345725131044529	TMSB4X;COTL1;TWF2;PFN1;GBA2
Regulation of Defense Response to Virus by Host (GO:0050691)	3/30	0.340427	0.873886	0	0	1.5076302181864043	1.624553714861015	TOMM70;HSP90AA1;PQBP1
Chromosome Organization (GO:0051276)	3/30	0.340427	0.873886	0	0	1.5076302181864043	1.624553714861015	MYC;GMNN;BANF1
Negative Regulation of Biosynthetic Process (GO:0009890)	3/30	0.340427	0.873886	0	0	1.5076302181864043	1.624553714861015	USP7;KHSRP;SIRT6
Positive Regulation of Non-Canonical NF-kappaB Signal Transduction (GO:1901224)	3/30	0.340427	0.873886	0	0	1.5076302181864043	1.624553714861015	VCP;RPS3;PHB2
Regulation of Hydrolase Activity (GO:0051336)	4/43	0.342107	0.873886	0	0	1.3918414918414919	1.4929330361951951	ATP5IF1;PPP1R17;NPM1;TBC1D10B
Retrograde Transport, Endosome to Golgi (GO:0042147)	7/83	0.344166	0.873886	0	0	1.2503000660145231	1.3336104977162528	RNF126;UBE2O;TRIM27;YKT6;PLEKHJ1;TBC1D10B;RAB7A
Positive Regulation of DNA Repair (GO:0045739)	7/83	0.344166	0.873886	0	0	1.2503000660145231	1.3336104977162528	TRIM28;RUVBL2;UBE2V2;RPS3;SIRT6;SMARCA4;WRAP53
ADP Transport (GO:0015866)	1/6	0.347677	0.873886	0	0	2.7125707814269537	2.865779858756751	SLC25A5
B Cell Proliferation (GO:0042100)	1/6	0.347677	0.873886	0	0	2.7125707814269537	2.865779858756751	HSPD1
HRI-mediated Signaling (GO:0140468)	1/6	0.347677	0.873886	0	0	2.7125707814269537	2.865779858756751	EIF2S1
Regulation of Hepatocyte Proliferation (GO:2000345)	1/6	0.347677	0.873886	0	0	2.7125707814269537	2.865779858756751	RTN4
Regulation of Humoral Immune Response (GO:0002920)	1/6	0.347677	0.873886	0	0	2.7125707814269537	2.865779858756751	PHB2
Regulation of Immune Effector Process (GO:0002697)	1/6	0.347677	0.873886	0	0	2.7125707814269537	2.865779858756751	PHB2
PERK-mediated Unfolded Protein Response (GO:0036499)	1/6	0.347677	0.873886	0	0	2.7125707814269537	2.865779858756751	EIF2S1
T Cell Apoptotic Process (GO:0070231)	1/6	0.347677	0.873886	0	0	2.7125707814269537	2.865779858756751	FASN
TRAMP-dependent tRNA Surveillance Pathway (GO:0071038)	1/6	0.347677	0.873886	0	0	2.7125707814269537	2.865779858756751	EXOSC3
Regulation of Lysosomal Protein Catabolic Process (GO:1905165)	1/6	0.347677	0.873886	0	0	2.7125707814269537	2.865779858756751	LAPTM4B
Regulation of Mitochondrial mRNA Stability (GO:0044528)	1/6	0.347677	0.873886	0	0	2.7125707814269537	2.865779858756751	TBRG4
Regulation of Mitotic Spindle Checkpoint (GO:1903504)	1/6	0.347677	0.873886	0	0	2.7125707814269537	2.865779858756751	CCNB1
Regulation of Neutrophil Migration (GO:1902622)	1/6	0.347677	0.873886	0	0	2.7125707814269537	2.865779858756751	RTN4
Regulation of Odontoblast Differentiation (GO:1901329)	1/6	0.347677	0.873886	0	0	2.7125707814269537	2.865779858756751	SERPINE1
Aspartate Family Amino Acid Biosynthetic Process (GO:0009067)	1/6	0.347677	0.873886	0	0	2.7125707814269537	2.865779858756751	MTRR
Auditory Receptor Cell Morphogenesis (GO:0002093)	1/6	0.347677	0.873886	0	0	2.7125707814269537	2.865779858756751	TPRN
Regulation of Protein Deubiquitination (GO:0090085)	1/6	0.347677	0.873886	0	0	2.7125707814269537	2.865779858756751	TRIM21
Biogenic Amine Catabolic Process (GO:0042402)	1/6	0.347677	0.873886	0	0	2.7125707814269537	2.865779858756751	SMOX
Branching Involved in Ureteric Bud Morphogenesis (GO:0001658)	1/6	0.347677	0.873886	0	0	2.7125707814269537	2.865779858756751	MYC
Regulation of Store-Operated Calcium Entry (GO:2001256)	1/6	0.347677	0.873886	0	0	2.7125707814269537	2.865779858756751	HOMER2
Regulation of Translational Initiation in Response to Stress (GO:0043558)	1/6	0.347677	0.873886	0	0	2.7125707814269537	2.865779858756751	PPP1CA
Regulation of Type 2 Mitophagy (GO:1905089)	1/6	0.347677	0.873886	0	0	2.7125707814269537	2.865779858756751	VDAC1
Regulation of Vascular Wound Healing (GO:0061043)	1/6	0.347677	0.873886	0	0	2.7125707814269537	2.865779858756751	SERPINE1
Centromeric Sister Chromatid Cohesion (GO:0070601)	1/6	0.347677	0.873886	0	0	2.7125707814269537	2.865779858756751	PPP2R1A
Response to Hydroperoxide (GO:0033194)	1/6	0.347677	0.873886	0	0	2.7125707814269537	2.865779858756751	GPX3
Clathrin-Coated Vesicle Cargo Loading (GO:0035652)	1/6	0.347677	0.873886	0	0	2.7125707814269537	2.865779858756751	AP3D1
Clathrin-Coated Vesicle Cargo Loading, AP-3-mediated (GO:0035654)	1/6	0.347677	0.873886	0	0	2.7125707814269537	2.865779858756751	AP3D1
Determination of Left/Right Asymmetry in Lateral Mesoderm (GO:0003140)	1/6	0.347677	0.873886	0	0	2.7125707814269537	2.865779858756751	SMOX
Somite Development (GO:0061053)	1/6	0.347677	0.873886	0	0	2.7125707814269537	2.865779858756751	SMOX
Steroid Catabolic Process (GO:0006706)	1/6	0.347677	0.873886	0	0	2.7125707814269537	2.865779858756751	YWHAH
Subtelomeric Heterochromatin Formation (GO:0031509)	1/6	0.347677	0.873886	0	0	2.7125707814269537	2.865779858756751	SIRT6
Engulfment of Apoptotic Cell (GO:0043652)	1/6	0.347677	0.873886	0	0	2.7125707814269537	2.865779858756751	XKR8
Establishment of Centrosome Localization (GO:0051660)	1/6	0.347677	0.873886	0	0	2.7125707814269537	2.865779858756751	MAD2L1
Termination of RNA Polymerase II Transcription (GO:0006369)	1/6	0.347677	0.873886	0	0	2.7125707814269537	2.865779858756751	SSU72
Establishment of Mitotic Sister Chromatid Cohesion (GO:0034087)	1/6	0.347677	0.873886	0	0	2.7125707814269537	2.865779858756751	RAD21
Exonucleolytic Trimming to Gen Mat 3'-End of 5.8S rRNA Frm Tricistronic rRNA Trnscpt (GO:0000467)	1/6	0.347677	0.873886	0	0	2.7125707814269537	2.865779858756751	EXOSC3
Facultative Heterochromatin Formation (GO:0140718)	1/6	0.347677	0.873886	0	0	2.7125707814269537	2.865779858756751	RRP8
Ureteric Bud Morphogenesis (GO:0060675)	1/6	0.347677	0.873886	0	0	2.7125707814269537	2.865779858756751	MYC
Genomic Imprinting (GO:0071514)	1/6	0.347677	0.873886	0	0	2.7125707814269537	2.865779858756751	PRMT7
Very-Low-Density Lipoprotein Particle Assembly (GO:0034379)	1/6	0.347677	0.873886	0	0	2.7125707814269537	2.865779858756751	APOC1
Glyceraldehyde-3-Phosphate Metabolic Process (GO:0019682)	1/6	0.347677	0.873886	0	0	2.7125707814269537	2.865779858756751	TKT
Heme Catabolic Process (GO:0042167)	1/6	0.347677	0.873886	0	0	2.7125707814269537	2.865779858756751	HMOX2
Internal Protein Amino Acid Acetylation (GO:0006475)	1/6	0.347677	0.873886	0	0	2.7125707814269537	2.865779858756751	KAT7
Lateral Mesoderm Development (GO:0048368)	1/6	0.347677	0.873886	0	0	2.7125707814269537	2.865779858756751	SMOX
Leptin-Mediated Signaling Pathway (GO:0033210)	1/6	0.347677	0.873886	0	0	2.7125707814269537	2.865779858756751	MKKS
Lymphocyte Mediated Immunity (GO:0002449)	1/6	0.347677	0.873886	0	0	2.7125707814269537	2.865779858756751	GNL1
Macromolecule Depalmitoylation (GO:0098734)	1/6	0.347677	0.873886	0	0	2.7125707814269537	2.865779858756751	LYPLA2
Macropinocytosis (GO:0044351)	1/6	0.347677	0.873886	0	0	2.7125707814269537	2.865779858756751	MAPKAPK3
Meiotic Spindle Assembly (GO:0090306)	1/6	0.347677	0.873886	0	0	2.7125707814269537	2.865779858756751	SKA3
Membrane Invagination (GO:0010324)	1/6	0.347677	0.873886	0	0	2.7125707814269537	2.865779858756751	HGS
Mitochondrial RNA 3'-End Processing (GO:0000965)	1/6	0.347677	0.873886	0	0	2.7125707814269537	2.865779858756751	HSD17B10
Mitochondrial Proton-Transporting ATP Synthase Complex Assembly (GO:0033615)	1/6	0.347677	0.873886	0	0	2.7125707814269537	2.865779858756751	ATP5F1D
Muscle Filament Sliding (GO:0030049)	1/6	0.347677	0.873886	0	0	2.7125707814269537	2.865779858756751	MYL6
Natural Killer Cell Differentiation (GO:0001779)	1/6	0.347677	0.873886	0	0	2.7125707814269537	2.865779858756751	KAT7
Negative Regulation of B Cell Apoptotic Process (GO:0002903)	1/6	0.347677	0.873886	0	0	2.7125707814269537	2.865779858756751	NOC2L
Negative Regulation of D-glucose Import (GO:0046325)	1/6	0.347677	0.873886	0	0	2.7125707814269537	2.865779858756751	PEA15
Negative Regulation of Calcium Ion Import (GO:0090281)	1/6	0.347677	0.873886	0	0	2.7125707814269537	2.865779858756751	TRIM27
Negative Regulation of Myotube Differentiation (GO:0010832)	1/6	0.347677	0.873886	0	0	2.7125707814269537	2.865779858756751	HDAC3
Negative Regulation of Nitric Oxide Biosynthetic Process (GO:0045019)	1/6	0.347677	0.873886	0	0	2.7125707814269537	2.865779858756751	KHSRP
Negative Regulation of Nitric Oxide Metabolic Process (GO:1904406)	1/6	0.347677	0.873886	0	0	2.7125707814269537	2.865779858756751	KHSRP
Negative Regulation of Plasminogen Activation (GO:0010757)	1/6	0.347677	0.873886	0	0	2.7125707814269537	2.865779858756751	SERPINE1
Negative Regulation of Vasoconstriction (GO:0045906)	1/6	0.347677	0.873886	0	0	2.7125707814269537	2.865779858756751	DOCK4
Nerve Growth Factor Signaling Pathway (GO:0038180)	1/6	0.347677	0.873886	0	0	2.7125707814269537	2.865779858756751	RAPGEF1
Neuron Projection Arborization (GO:0140058)	1/6	0.347677	0.873886	0	0	2.7125707814269537	2.865779858756751	SSNA1
Nuclear Polyadenylation-Dependent rRNA Catabolic Process (GO:0071035)	1/6	0.347677	0.873886	0	0	2.7125707814269537	2.865779858756751	EXOSC3
Nucleic Acid Transport (GO:0050657)	1/6	0.347677	0.873886	0	0	2.7125707814269537	2.865779858756751	RTRAF
Phospholipid Homeostasis (GO:0055091)	1/6	0.347677	0.873886	0	0	2.7125707814269537	2.865779858756751	TLCD1
Phototransduction, Visible Light (GO:0007603)	1/6	0.347677	0.873886	0	0	2.7125707814269537	2.865779858756751	GNA11
Pigment Catabolic Process (GO:0046149)	1/6	0.347677	0.873886	0	0	2.7125707814269537	2.865779858756751	HMOX2
Positive Regulation of Rac Protein Signal Transduction (GO:0035022)	1/6	0.347677	0.873886	0	0	2.7125707814269537	2.865779858756751	RTN4
Positive Regulation of Cytoplasmic Translational Initiation (GO:1904690)	1/6	0.347677	0.873886	0	0	2.7125707814269537	2.865779858756751	MTOR
Positive Regulation of Immune Response to Tumor Cell (GO:0002839)	1/6	0.347677	0.873886	0	0	2.7125707814269537	2.865779858756751	HSPD1
Positive Regulation of Reactive Oxygen Species Biosynthetic Process (GO:1903428)	1/6	0.347677	0.873886	0	0	2.7125707814269537	2.865779858756751	FASN
Positive Regulation of Translation in Response to Stress (GO:0032056)	1/6	0.347677	0.873886	0	0	2.7125707814269537	2.865779858756751	EIF4G1
Post-Translational Protein Targeting to Membrane, Translocation (GO:0031204)	1/6	0.347677	0.873886	0	0	2.7125707814269537	2.865779858756751	SEC61B
Postsynapse Organization (GO:0099173)	1/6	0.347677	0.873886	0	0	2.7125707814269537	2.865779858756751	ARHGAP39
Protein Depalmitoylation (GO:0002084)	1/6	0.347677	0.873886	0	0	2.7125707814269537	2.865779858756751	LYPLA2
Protein Retention in ER Lumen (GO:0006621)	1/6	0.347677	0.873886	0	0	2.7125707814269537	2.865779858756751	GPAA1
Proton-Transporting ATP Synthase Complex Assembly (GO:0043461)	1/6	0.347677	0.873886	0	0	2.7125707814269537	2.865779858756751	ATP5F1D
Purine Nucleotide Catabolic Process (GO:0006195)	1/6	0.347677	0.873886	0	0	2.7125707814269537	2.865779858756751	HINT1
rDNA Heterochromatin Formation (GO:0000183)	1/6	0.347677	0.873886	0	0	2.7125707814269537	2.865779858756751	RRP8
Random Inactivation of X Chromosome (GO:0060816)	1/6	0.347677	0.873886	0	0	2.7125707814269537	2.865779858756751	HNRNPK
Regulation of B Cell Apoptotic Process (GO:0002902)	1/6	0.347677	0.873886	0	0	2.7125707814269537	2.865779858756751	NOC2L
Regulation of T-helper 17 Type Immune Response (GO:2000316)	1/6	0.347677	0.873886	0	0	2.7125707814269537	2.865779858756751	RNASEH2A
Modification-Dependent Protein Catabolic Process (GO:0019941)	15/193	0.348348	0.873886	0	0	1.1445740292988196	1.2070144618315555	VCP;PSMD11;PSMD14;PSMD13;UBE2J2;CCAR1;HERC4;RNF167;RNF126;PSMD3;PSMF1;FAU;RPS27A;UBA52;SPSB4
Spindle Assembly (GO:0051225)	6/70	0.349322	0.873886	0	0	1.2724587129840548	1.3383214207397147	HDAC3;PPP2R1A;INCENP;BCCIP;RPS3;AURKB
Chromatin Remodeling (GO:0006338)	18/235	0.350726	0.873886	0	0	1.126807930950075	1.1806138213785184	PRMT5;DAXX;NPM1;PRMT7;HDAC3;PRMT1;DDX56;DDX23;SIRT6;NUDT5;NPM3;IWS1;SMARCA4;CDK9;PER1;SART3;MYC;RUVBL2
Regulation of Lysosomal Lumen pH (GO:0035751)	2/18	0.353644	0.873886	0	0	1.695719954648526	1.7626429826626275	LAMP1;ATP6V1F
Regulation of Mitochondrial Fission (GO:0090140)	2/18	0.353644	0.873886	0	0	1.695719954648526	1.7626429826626275	PGAM5;MCU
Regulation of Neutrophil Chemotaxis (GO:0090022)	2/18	0.353644	0.873886	0	0	1.695719954648526	1.7626429826626275	TNFAIP6;MCU
Chromosome Condensation (GO:0030261)	2/18	0.353644	0.873886	0	0	1.695719954648526	1.7626429826626275	CDCA5;CHMP1A
tRNA Aminoacylation for Protein Translation (GO:0006418)	2/18	0.353644	0.873886	0	0	1.695719954648526	1.7626429826626275	LARS2;FARSA
Mitotic Sister Chromatid Cohesion (GO:0007064)	2/18	0.353644	0.873886	0	0	1.695719954648526	1.7626429826626275	CDCA5;RAD21
Natural Killer Cell Activation (GO:0030101)	2/18	0.353644	0.873886	0	0	1.695719954648526	1.7626429826626275	PRDX1;KAT7
Negative Regulation of DNA Binding (GO:0043392)	2/18	0.353644	0.873886	0	0	1.695719954648526	1.7626429826626275	JUN;SMOX
Negative Regulation of Endoplasmic Reticulum Unfolded Protein Response (GO:1900102)	2/18	0.353644	0.873886	0	0	1.695719954648526	1.7626429826626275	HSPA5;TMBIM6
Negative Regulation of Transferase Activity (GO:0051348)	2/18	0.353644	0.873886	0	0	1.695719954648526	1.7626429826626275	BANF1;PHPT1
Neutrophil Migration (GO:1990266)	2/18	0.353644	0.873886	0	0	1.695719954648526	1.7626429826626275	PPIB;PPIA
Nuclear Envelope Organization (GO:0006998)	2/18	0.353644	0.873886	0	0	1.695719954648526	1.7626429826626275	LMNA;LMNB2
Pore Complex Assembly (GO:0046931)	2/18	0.353644	0.873886	0	0	1.695719954648526	1.7626429826626275	PDZD11;RTN4
Positive Regulation of Morphogenesis of an Epithelium (GO:1905332)	2/18	0.353644	0.873886	0	0	1.695719954648526	1.7626429826626275	SMOX;SIRT6
Regulation of Actin Filament Bundle Assembly (GO:0032231)	2/18	0.353644	0.873886	0	0	1.695719954648526	1.7626429826626275	FHOD1;PFN1
Regulation of Cholesterol Transport (GO:0032374)	2/18	0.353644	0.873886	0	0	1.695719954648526	1.7626429826626275	APOC1;LAMTOR1
Positive Regulation of Apoptotic Process (GO:0043065)	18/236	0.357489	0.873886	0	0	1.1215437421870034	1.1536771822181329	JUN;MTCH2;TNFRSF12A;UTP11;CCAR1;RHOB;SAV1;HSPD1;STK17A;FASN;DNAJA3;RPS3;BAX;VDAC1;RNPS1;CTSD;CTNNBL1;PHLDA3
Regulation of Ubiquitin-Dependent Protein Catabolic Process (GO:2000058)	4/44	0.358087	0.873886	0	0	1.3569318181818182	1.3935422567562508	BCAP31;RPL23;AXIN1;MTOR
Nucleus Organization (GO:0006997)	4/44	0.358087	0.873886	0	0	1.3569318181818182	1.3935422567562508	RPS19;CHMP1A;LMNA;LMNB2
Negative Regulation of Cell Cycle Process (GO:0010948)	3/31	0.359679	0.873886	0	0	1.453664666774769	1.4864360404121486	SKA3;AURKAIP1;AURKB
Positive Regulation of Epithelial Cell Migration (GO:0010634)	3/31	0.359679	0.873886	0	0	1.453664666774769	1.4864360404121486	PFN1;RTN4;MTOR
Purine Nucleotide Metabolic Process (GO:0006163)	3/31	0.359679	0.873886	0	0	1.453664666774769	1.4864360404121486	VCP;NMRK2;AMPD2
Negative Regulation of Gene Expression (GO:0010629)	21/279	0.364143	0.873886	0	0	1.1056751731385916	1.116963565720576	DAXX;SMOX;EIF4A3;SIRT6;PPHLN1;MALSU1;RPS26;EXOSC5;CHMP1A;CPNE1;RPS3;ERP29;TMBIM6;TRIM27;CALR;PABPC1;EXOSC3;TARDBP;HRAS;GAPDH;RPS13
Regulation of mRNA Splicing, via Spliceosome (GO:0048024)	7/85	0.366998	0.873886	0	0	1.218036429552963	1.2209577891035095	HNRNPL;PRMT5;HNRNPK;SRSF4;RNPS1;WDR77;SRSF9
Positive Regulation of Response to Stimulus (GO:0048584)	5/58	0.368082	0.873886	0	0	1.2801854594629403	1.279479681120643	TRIM28;RUVBL2;RPS3;PSMA7;WRAP53
Regulation of Protein Localization to Nucleus (GO:1900180)	4/45	0.374058	0.873886	0	0	1.3237250554323725	1.3016762419451826	KAT7;MTOR;BYSL;LAMTOR5
Mitotic Nuclear Division (GO:0140014)	4/45	0.374058	0.873886	0	0	1.3237250554323725	1.3016762419451826	CTDP1;SKA3;KNSTRN;RAN
Protein Localization (GO:0008104)	23/309	0.375636	0.873886	0	0	1.0923426167328607	1.0695506178580765	NPM1;WDR45B;RAB1B;AP3D1;SHROOM2;NBEAL2;TIMM21;PRPF19;TIMM50;EHD1;RRAGA;SEC23IP;YWHAQ;SCFD2;SNX17;HGS;LMNA;ERP29;TIMM17A;TMED2;SPTSSA;LAMTOR1;YWHAH
Dephosphorylation (GO:0016311)	7/86	0.378456	0.873886	0	0	1.2025172120144914	1.1684327692614702	PPP5C;CTDP1;PHPT1;DUSP8;TIMM50;PPM1G;PPP1CA
Integrated Stress Response Signaling (GO:0140467)	3/32	0.378846	0.873886	0	0	1.4034208775294532	1.3621978724279826	JUN;RNASEH2A;EIF2S1
Positive Regulation of Protein Binding (GO:0032092)	3/32	0.378846	0.873886	0	0	1.4034208775294532	1.3621978724279826	IDE;TRIM21;RAN
Positive Regulation of Wound Healing (GO:0090303)	3/32	0.378846	0.873886	0	0	1.4034208775294532	1.3621978724279826	SERPINE1;HRAS;MTOR
Protein Destabilization (GO:0031648)	3/32	0.378846	0.873886	0	0	1.4034208775294532	1.3621978724279826	SIRT6;TRIM21;MTOR
Regulation of Macrophage Activation (GO:0043030)	2/19	0.379002	0.873886	0	0	1.5958383353341337	1.548304039133872	TNIP2;HSPD1
Reg of Mt Outer Membrane Permeabilization Inv in Apoptotic Sgnlng Pway (GO:1901028)	2/19	0.379002	0.873886	0	0	1.5958383353341337	1.548304039133872	CHCHD10;SLC25A5
Anaphase-Promoting Complex-Dependent Catabolic Process (GO:0031145)	2/19	0.379002	0.873886	0	0	1.5958383353341337	1.548304039133872	CDC20;ANAPC7
Regulation of Ruffle Assembly (GO:1900027)	2/19	0.379002	0.873886	0	0	1.5958383353341337	1.548304039133872	PFN1;HRAS
Entrainment of Circadian Clock by Photoperiod (GO:0043153)	2/19	0.379002	0.873886	0	0	1.5958383353341337	1.548304039133872	PER1;PPP1CA
Modulation by Host of Viral Genome Replication (GO:0044827)	2/19	0.379002	0.873886	0	0	1.5958383353341337	1.548304039133872	DDX56;PPIB
Negative Regulation of Protein Transport (GO:0051224)	2/19	0.379002	0.873886	0	0	1.5958383353341337	1.548304039133872	DPH3;ERP29
Positive Regulation of G2/M Transition of Mitotic Cell Cycle (GO:0010971)	2/19	0.379002	0.873886	0	0	1.5958383353341337	1.548304039133872	CCNB1;CDK4
Positive Regulation of Fibroblast Proliferation (GO:0048146)	2/19	0.379002	0.873886	0	0	1.5958383353341337	1.548304039133872	CDK4;MYC
Protein Neddylation (GO:0045116)	2/19	0.379002	0.873886	0	0	1.5958383353341337	1.548304039133872	GPS1;COPS7A
Positive Regulation of Biosynthetic Process (GO:0009891)	5/59	0.382024	0.873886	0	0	1.256372982766612	1.2089710130925864	HSP90AA1;HSP90AB1;FASN;PRKAG2;MTOR
Protein-Containing Complex Disassembly (GO:0032984)	5/59	0.382024	0.873886	0	0	1.256372982766612	1.2089710130925864	VCP;MYC;RPL23;CHMP1A;GSPT1
Regulation of Non-Canonical NF-kappaB Signal Transduction (GO:1901222)	4/46	0.389996	0.873886	0	0	1.2920995670995672	1.2166641377783114	VCP;CPNE1;RPS3;PHB2
Dicarboxylic Acid Metabolic Process (GO:0043648)	4/46	0.389996	0.873886	0	0	1.2920995670995672	1.2166641377783114	MTRR;GOT2;OGDH;ALDH18A1
Positive Regulation of Protein Secretion (GO:0050714)	4/46	0.389996	0.873886	0	0	1.2920995670995672	1.2166641377783114	SIRT6;PTPN23;PPIA;MCU
Intrinsic Apoptotic Signaling Pathway (GO:0097193)	8/101	0.39189	0.873886	0	0	1.167378602641528	1.0935707100974597	HINT1;CUL2;GSKIP;CYCS;BAX;HSPE1;RRP8;EPHA2
CD40 Signaling Pathway (GO:0023035)	1/7	0.392521	0.873886	0	0	2.2602869007172517	2.113739650014006	TNIP2
Regulation of Fibroblast Apoptotic Process (GO:2000269)	1/7	0.392521	0.873886	0	0	2.2602869007172517	2.113739650014006	STK17A
Golgi Lumen Acidification (GO:0061795)	1/7	0.392521	0.873886	0	0	2.2602869007172517	2.113739650014006	ATP6V1F
Regulation of Hair Cycle (GO:0042634)	1/7	0.392521	0.873886	0	0	2.2602869007172517	2.113739650014006	PER1
Regulation of Lymphocyte Differentiation (GO:0045619)	1/7	0.392521	0.873886	0	0	2.2602869007172517	2.113739650014006	XRCC6
TORC2 Signaling (GO:0038203)	1/7	0.392521	0.873886	0	0	2.2602869007172517	2.113739650014006	MTOR
Regulation of mRNA Export From Nucleus (GO:0010793)	1/7	0.392521	0.873886	0	0	2.2602869007172517	2.113739650014006	IWS1
Actin-Myosin Filament Sliding (GO:0033275)	1/7	0.392521	0.873886	0	0	2.2602869007172517	2.113739650014006	MYL6
Activation of Protein Kinase B Activity (GO:0032148)	1/7	0.392521	0.873886	0	0	2.2602869007172517	2.113739650014006	PPIA
Regulation of miRNA-mediated Gene Silencing (GO:0060964)	1/7	0.392521	0.873886	0	0	2.2602869007172517	2.113739650014006	ELAVL1
Aminoglycan Catabolic Process (GO:0006026)	1/7	0.392521	0.873886	0	0	2.2602869007172517	2.113739650014006	GUSB
Anterograde Dendritic Transport (GO:0098937)	1/7	0.392521	0.873886	0	0	2.2602869007172517	2.113739650014006	STAU1
Antifungal Humoral Response (GO:0019732)	1/7	0.392521	0.873886	0	0	2.2602869007172517	2.113739650014006	LTF
Apical Protein Localization (GO:0045176)	1/7	0.392521	0.873886	0	0	2.2602869007172517	2.113739650014006	SHROOM2
Regulation of Protein Localization to Cilium (GO:1903564)	1/7	0.392521	0.873886	0	0	2.2602869007172517	2.113739650014006	ENTR1
Box C/D snoRNP Assembly (GO:0000492)	1/7	0.392521	0.873886	0	0	2.2602869007172517	2.113739650014006	RUVBL2
Brain Morphogenesis (GO:0048854)	1/7	0.392521	0.873886	0	0	2.2602869007172517	2.113739650014006	MKKS
Regulation of Response to Wounding (GO:1903034)	1/7	0.392521	0.873886	0	0	2.2602869007172517	2.113739650014006	TNFRSF12A
Regulation of Ribonucleoprotein Complex Localization (GO:2000197)	1/7	0.392521	0.873886	0	0	2.2602869007172517	2.113739650014006	IWS1
Cardiocyte Differentiation (GO:0035051)	1/7	0.392521	0.873886	0	0	2.2602869007172517	2.113739650014006	SIRT6
Regulation of Stress-Activated Protein Kinase Signaling Cascade (GO:0070302)	1/7	0.392521	0.873886	0	0	2.2602869007172517	2.113739650014006	GSTP1
Regulation of Toll-Like Receptor 9 Signaling Pathway (GO:0034163)	1/7	0.392521	0.873886	0	0	2.2602869007172517	2.113739650014006	RTN4
Regulation of Tumor Necrosis Factor Superfamily Cytokine Production (GO:1903555)	1/7	0.392521	0.873886	0	0	2.2602869007172517	2.113739650014006	LTF
Regulatory ncRNA-mediated Heterochromatin Formation (GO:0031048)	1/7	0.392521	0.873886	0	0	2.2602869007172517	2.113739650014006	HNRNPK
Response to Ethanol (GO:0045471)	1/7	0.392521	0.873886	0	0	2.2602869007172517	2.113739650014006	GOT2
Serine Family Amino Acid Biosynthetic Process (GO:0009070)	1/7	0.392521	0.873886	0	0	2.2602869007172517	2.113739650014006	SEPHS1
Depyrimidination (GO:0045008)	1/7	0.392521	0.873886	0	0	2.2602869007172517	2.113739650014006	NTHL1
Steroid Hormone Receptor Signaling Pathway (GO:0043401)	1/7	0.392521	0.873886	0	0	2.2602869007172517	2.113739650014006	ZDHHC7
Synaptic Signaling (GO:0099536)	1/7	0.392521	0.873886	0	0	2.2602869007172517	2.113739650014006	DTNA
Synaptic Vesicle Budding From Presynaptic Endocytic Zone Membrane (GO:0016185)	1/7	0.392521	0.873886	0	0	2.2602869007172517	2.113739650014006	AP3D1
tRNA Surveillance (GO:0106354)	1/7	0.392521	0.873886	0	0	2.2602869007172517	2.113739650014006	EXOSC3
Vascular Endothelial Cell Response to Laminar Fluid Shear Stress (GO:0097700)	1/7	0.392521	0.873886	0	0	2.2602869007172517	2.113739650014006	MTOR
Insulin Metabolic Process (GO:1901142)	1/7	0.392521	0.873886	0	0	2.2602869007172517	2.113739650014006	IDE
Intracellular Triglyceride Homeostasis (GO:0035356)	1/7	0.392521	0.873886	0	0	2.2602869007172517	2.113739650014006	LDAH
Membrane Biogenesis (GO:0044091)	1/7	0.392521	0.873886	0	0	2.2602869007172517	2.113739650014006	TLCD1
Methionine Metabolic Process (GO:0006555)	1/7	0.392521	0.873886	0	0	2.2602869007172517	2.113739650014006	MTRR
Mitochondrial DNA Replication (GO:0006264)	1/7	0.392521	0.873886	0	0	2.2602869007172517	2.113739650014006	TWNK
Mitochondrial tRNA Processing (GO:0090646)	1/7	0.392521	0.873886	0	0	2.2602869007172517	2.113739650014006	HSD17B10
Negative Regulation of JUN Kinase Activity (GO:0043508)	1/7	0.392521	0.873886	0	0	2.2602869007172517	2.113739650014006	GSTP1
Negative Regulation of Cell Adhesion Mediated by Integrin (GO:0033629)	1/7	0.392521	0.873886	0	0	2.2602869007172517	2.113739650014006	SERPINE1
Negative Regulation of Cell-Cell Adhesion Mediated by Cadherin (GO:2000048)	1/7	0.392521	0.873886	0	0	2.2602869007172517	2.113739650014006	EPCAM
Negative Regulation of Coagulation (GO:0050819)	1/7	0.392521	0.873886	0	0	2.2602869007172517	2.113739650014006	SERPINE1
Negative Regulation of Double-Strand Break Repair via Nonhomologous End Joining (GO:2001033)	1/7	0.392521	0.873886	0	0	2.2602869007172517	2.113739650014006	HSF1
Negative Regulation of Glycoprotein Biosynthetic Process (GO:0010561)	1/7	0.392521	0.873886	0	0	2.2602869007172517	2.113739650014006	ITM2C
Negative Regulation of Hematopoietic Progenitor Cell Differentiation (GO:1901533)	1/7	0.392521	0.873886	0	0	2.2602869007172517	2.113739650014006	TMSB4X
Negative Regulation of Lipopolysaccharide-Mediated Signaling Pathway (GO:0031665)	1/7	0.392521	0.873886	0	0	2.2602869007172517	2.113739650014006	LTF
Negative Regulation of Lymphocyte Apoptotic Process (GO:0070229)	1/7	0.392521	0.873886	0	0	2.2602869007172517	2.113739650014006	NOC2L
Nucleobase-Containing Small Molecule Interconversion (GO:0015949)	1/7	0.392521	0.873886	0	0	2.2602869007172517	2.113739650014006	AK6
Nucleolar Chromatin Organization (GO:1990700)	1/7	0.392521	0.873886	0	0	2.2602869007172517	2.113739650014006	RRP8
Nucleoside Triphosphate Metabolic Process (GO:0009141)	1/7	0.392521	0.873886	0	0	2.2602869007172517	2.113739650014006	ITPA
Porphyrin-Containing Compound Catabolic Process (GO:0006787)	1/7	0.392521	0.873886	0	0	2.2602869007172517	2.113739650014006	HMOX2
Positive Regulation of IRE1-mediated Unfolded Protein Response (GO:1903896)	1/7	0.392521	0.873886	0	0	2.2602869007172517	2.113739650014006	BAX
Positive Regulation of Attachment of Mitotic Spindle Microtubules to Kinetochore (GO:1902425)	1/7	0.392521	0.873886	0	0	2.2602869007172517	2.113739650014006	INCENP
Positive Regulation of Branching Involved in Ureteric Bud Morphogenesis (GO:0090190)	1/7	0.392521	0.873886	0	0	2.2602869007172517	2.113739650014006	SMOX
Positive Regulation of Chromatin Binding (GO:0035563)	1/7	0.392521	0.873886	0	0	2.2602869007172517	2.113739650014006	GMNN
Positive Regulation of Dendritic Spine Morphogenesis (GO:0061003)	1/7	0.392521	0.873886	0	0	2.2602869007172517	2.113739650014006	DBN1
Positive Regulation of Keratinocyte Migration (GO:0051549)	1/7	0.392521	0.873886	0	0	2.2602869007172517	2.113739650014006	MTOR
Positive Regulation of Leukocyte Degranulation (GO:0043302)	1/7	0.392521	0.873886	0	0	2.2602869007172517	2.113739650014006	LAMP1
Positive Regulation of Macrophage Cytokine Production (GO:0060907)	1/7	0.392521	0.873886	0	0	2.2602869007172517	2.113739650014006	RTN4
Positive Regulation of Mesenchymal Cell Proliferation (GO:0002053)	1/7	0.392521	0.873886	0	0	2.2602869007172517	2.113739650014006	MYC
+ Reg of Mt Outer Membrane Permeabilization Inv in Apoptotic Sgnlng Pway (GO:1901030)	1/7	0.392521	0.873886	0	0	2.2602869007172517	2.113739650014006	CHCHD10
Positive Regulation of Natural Killer Cell Mediated Cytotoxicity (GO:0045954)	1/7	0.392521	0.873886	0	0	2.2602869007172517	2.113739650014006	LAMP1
Positive Regulation of Neuron Projection Arborization (GO:0150012)	1/7	0.392521	0.873886	0	0	2.2602869007172517	2.113739650014006	DVL2
Positive Regulation of Phospholipid Transport (GO:2001140)	1/7	0.392521	0.873886	0	0	2.2602869007172517	2.113739650014006	TRIAP1
Protein Desumoylation (GO:0016926)	1/7	0.392521	0.873886	0	0	2.2602869007172517	2.113739650014006	SENP3
Purine Ribonucleoside Bisphosphate Metabolic Process (GO:0034035)	1/7	0.392521	0.873886	0	0	2.2602869007172517	2.113739650014006	TPST2
Regulation of T Cell Differentiation in Thymus (GO:0033081)	1/7	0.392521	0.873886	0	0	2.2602869007172517	2.113739650014006	CLPTM1
Regulation of Amide Metabolic Process (GO:0034248)	1/7	0.392521	0.873886	0	0	2.2602869007172517	2.113739650014006	PAQR4
Regulation of Centriole Elongation (GO:1903722)	1/7	0.392521	0.873886	0	0	2.2602869007172517	2.113739650014006	PPP1R35
Lysosomal Transport (GO:0007041)	5/60	0.395954	0.873886	0	0	1.2334264143137863	1.142717168531252	LAMP1;HGS;CHMP1A;AP3D1;RAB7A
Negative Regulation of Apoptotic Signaling Pathway (GO:2001234)	5/60	0.395954	0.873886	0	0	1.2334264143137863	1.142717168531252	GSTP1;TMBIM6;TRIAP1;NOC2L;SLC25A5
Stem Cell Differentiation (GO:0048863)	3/33	0.397887	0.873886	0	0	1.3565266742338251	1.250159336442648	PSMD11;EPCAM;NELFB
Sterol Metabolic Process (GO:0016125)	3/33	0.397887	0.873886	0	0	1.3565266742338251	1.250159336442648	SQLE;PRKAG2;GBA2
tRNA Methylation (GO:0030488)	3/33	0.397887	0.873886	0	0	1.3565266742338251	1.250159336442648	TRMU;HSD17B10;FTSJ1
Nitrogen Compound Transport (GO:0071705)	9/116	0.4031	0.873886	0	0	1.1414259012016021	1.0370674134170277	SLC52A2;GIPC1;CHMP1A;SLC25A22;SCAMP3;HSP90B1;CD320;RAB7A;SLC25A13
Regulation of Fatty Acid Biosynthetic Process (GO:0042304)	2/20	0.403932	0.873886	0	0	1.5070546737213404	1.366159707804731	EIF6;APOC1
Regulation of Intracellular Steroid Hormone Receptor Signaling Pathway (GO:0033143)	2/20	0.403932	0.873886	0	0	1.5070546737213404	1.366159707804731	SAFB2;SAFB
Regulation of Muscle Cell Differentiation (GO:0051147)	2/20	0.403932	0.873886	0	0	1.5070546737213404	1.366159707804731	CDK9;LMNB2
Regulation of Protein Export From Nucleus (GO:0046825)	2/20	0.403932	0.873886	0	0	1.5070546737213404	1.366159707804731	SIRT6;RANGAP1
Superoxide Metabolic Process (GO:0006801)	2/20	0.403932	0.873886	0	0	1.5070546737213404	1.366159707804731	NQO1;PRDX1
Negative Regulation of Small Molecule Metabolic Process (GO:0062014)	2/20	0.403932	0.873886	0	0	1.5070546737213404	1.366159707804731	USP7;SIRT6
Nuclear Membrane Reassembly (GO:0031468)	2/20	0.403932	0.873886	0	0	1.5070546737213404	1.366159707804731	CHMP1A;BANF1
Nucleoside Phosphate Metabolic Process (GO:0006753)	2/20	0.403932	0.873886	0	0	1.5070546737213404	1.366159707804731	PARG;NUDT5
Photoperiodism (GO:0009648)	2/20	0.403932	0.873886	0	0	1.5070546737213404	1.366159707804731	PER1;PPP1CA
Positive Regulation of DNA Replication (GO:0045740)	2/20	0.403932	0.873886	0	0	1.5070546737213404	1.366159707804731	CDT1;KAT7
Positive Regulation of Cilium Assembly (GO:0045724)	2/20	0.403932	0.873886	0	0	1.5070546737213404	1.366159707804731	PPP1R35;ENTR1
Positive Regulation of mRNA Processing (GO:0050685)	2/20	0.403932	0.873886	0	0	1.5070546737213404	1.366159707804731	PRMT5;WDR77
Regulation of Cell Size (GO:0008361)	2/20	0.403932	0.873886	0	0	1.5070546737213404	1.366159707804731	MTOR;LAMTOR5
RNA 3'-End Processing (GO:0031123)	4/47	0.405876	0.873886	0	0	1.2619450317124736	1.137906099599251	SSB;CSTF3;PAPOLA;INTS8
Endosome Organization (GO:0007032)	4/47	0.405876	0.873886	0	0	1.2619450317124736	1.137906099599251	LAPTM4B;LAMTOR1;PLEKHJ1;ATP6V1F
[truncated: 1,446 more rows]

## Sheet: GOCC_Downregulated_in_8p
Term	Overlap	P-value	Adjusted P-value	Old P-value	Old Adjusted P-value	Odds Ratio	Combined Score	Genes
[truncated: 303 more rows]

[truncated: 4 more sheets: GOMF_Downregulated_in_8p, GOBP_Downregulated_in_21, GOCC_Downregulated_in_21, GOMF_Downregulated_in_21]
